# Supplementary material for: Monitoring Drug-Target Interactions through Target Engagement-Mediated Amplification on Arrays and in situ
Source: Research Square preprint supplement (doi:10.21203/rs.3.rs-1109577/v1), 2021-12-06
Supplement: Supplementary file 1 [file 7fe004eaa18ee2d2585d9f68.xlsx]

## Sheet: Dasatinib 1nM probe
Block	Column	Row	Name	ID	X	Y	Dia.	F635 Median	F635 Mean	F635 SD	F635 CV	B635	B635 Median	B635 Mean	B635 SD	B635 CV	% > B635+1SD	% > B635+2SD	F635 % Sat.	F532 Median	F532 Mean	F532 SD	F532 CV	B532	B532 Median	B532 Mean	B532 SD	B532 CV	% > B532+1SD	% > B532+2SD	F532 % Sat.	Ratio of Medians (635/532)	Ratio of Means (635/532)	Median of Ratios (635/532)	Mean of Ratios (635/532)	Ratios SD (635/532)	Rgn Ratio (635/532)	Rgn R2 (635/532)	F Pixels	B Pixels	Circularity	Sum of Medians (635/532)	Sum of Means (635/532)	Log Ratio (635/532)	F635 Median - B635	F532 Median - B532	F635 Mean - B635	F532 Mean - B532	F635 Total Intensity
29	18	18	Hs~Ref:NM_001715.2~uORF:IOH57009~RFU:24921.88	HA20457~B29R18C18	6270	37630	110	65535	65535	0	0	260	260	1230	4532	368	100	100	100	353	432	306	70	132	132	165	76	46	100	100	0	295.362	217.583	295.368	256.946	1.565	121.725	0.054	80	558	100	65496	65575	8.206	65275	221	65275	300	5242800
47	4	8	Hs~Ref:NM_004441.2~N/A~RFU:28817.69	HA20457~B47R08C04	12580	53610	110	65535	65535	0	0	52	52	4924	12883	261	100	100	100	553	1849	3807	205	175	175	201	75	37	100	100	0	173.235	39.118	173.235	100.647	3.046	43.872	0.088	80	575	100	65861	67157	7.437	65483	378	65483	1674	5242800
29	17	18	Hs~Ref:NM_001715.2~uORF:IOH57009~RFU:25784.04	HA20457~B29R18C17	6070	37630	110	65535	65526	77	0	83	83	1210	6005	496	100	100	98	922	6499	12308	189	130	130	136	41	30	100	100	0	82.641	10.275	82.717	49.010	5.285	13.923	0.109	80	558	100	66244	71812	6.369	65452	792	65443	6369	5242112
43	18	5	Hs~Ref:NM_005433.2~uORF:IOH26758~RFU:20858.44	HA20457~B43R05C18	15290	48500	110	65535	65517	157	0	796	796	5850	10744	183	100	100	98	601	3299	6067	183	137	137	167	67	40	100	100	0	139.524	20.468	139.617	76.957	4.436	30.838	0.092	80	548	100	65203	67883	7.124	64739	464	64721	3162	5241395
22	22	14	Hs~Ref:NM_005536.2~uORF:IOH21098~RFU:28482.14	HA20457~B22R14C22	11440	27820	110	65535	65329	739	1	57	57	771	3072	398	100	100	87	519	2789	7893	283	108	108	293	814	277	35	26	0	159.314	24.346	160.348	92.432	3.767	19.663	0.067	80	580	100	65889	67953	7.316	65478	411	65272	2681	5226294
39	22	15	Hs~Ref:NM_004439.4~CAT:PV3840~RFU:8001.3	HA20457~B39R15C22	16080	46030	110	65535	65325	669	1	49	49	287	1353	471	100	100	86	3446	9473	13632	143	146	146	171	60	35	100	100	1	19.844	6.999	19.844	19.926	5.058	7.366	0.196	80	581	100	68786	74603	4.311	65486	3300	65276	9327	5225975
17	19	15	Hs~Ref:NM_001721.2~CAT:PV3371~RFU:232.53	HA20457~B17R15C19	6330	23570	110	65535	65295	957	1	47	47	304	1058	348	100	100	90	626	1214	2056	169	105	105	108	29	26	100	100	0	125.697	58.835	125.108	97.505	2.092	71.760	0.154	80	566	100	66009	66357	6.974	65488	521	65248	1109	5223624
34	6	16	Hs~Ref:NP_005408~CAT:P3044~RFU:40.92	HA20457~B34R16C06	8320	41760	110	65535	65161	2284	3	399	399	2145	7069	329	100	100	95	419	4248	10369	244	144	144	184	364	197	37	33	0	236.858	15.780	237.290	101.954	5.164	18.409	0.073	80	528	100	65411	68866	7.888	65136	275	64762	4104	5212859
43	17	5	Hs~Ref:NM_005433.2~uORF:IOH26758~RFU:20381.32	HA20457~B43R05C17	15090	48500	110	65535	64985	3940	6	6722	6722	7408	9365	126	100	100	96	1576	7828	16888	215	206	206	222	267	120	92	73	5	42.929	7.644	43.121	32.896	4.865	11.103	0.072	80	576	100	60183	65885	5.424	58813	1370	58263	7622	5198819
22	21	14	Hs~Ref:NM_005536.2~uORF:IOH21098~RFU:28537.02	HA20457~B22R14C21	11240	27820	110	65535	64794	2636	4	143	143	1065	4494	421	100	100	77	3955	10688	15327	143	124	124	697	1644	235	61	53	1	17.069	6.120	17.069	21.785	6.314	10.172	0.105	80	559	100	69223	75215	4.093	65392	3831	64651	10564	5183501
32	17	15	Hs~Ref:NM_005158.2~CAT:PV3266~RFU:137.55	HA20457~B32R15C17	19540	37000	110	65535	64786	3839	5	47	47	119	298	250	100	100	95	727	1166	1198	102	76	76	80	28	35	100	100	0	100.596	59.394	95.369	80.377	1.969	69.455	0.342	80	584	100	66139	65829	6.652	65488	651	64739	1090	5182842
44	15	15	Hs~Ref:NM_001006943.1~CAT:PV3844~RFU:14539.62	HA20457~B44R15C15	19230	50490	110	65535	64685	3104	4	52	52	173	271	156	100	100	60	368	435	324	74	129	129	129	19	14	100	100	0	273.987	211.219	270.939	252.178	1.626	225.705	0.381	80	566	100	65722	64939	8.098	65483	239	64633	306	5174794
47	3	8	Hs~Ref:NM_004441.2~N/A~RFU:29318.27	HA20457~B47R08C03	12360	53620	110	65535	64638	3553	5	1167	1167	7586	14467	190	100	100	91	471	583	536	91	197	197	239	91	38	100	100	0	234.920	164.433	230.357	204.105	1.598	147.168	0.209	80	564	100	64642	63857	7.876	64368	274	63471	386	5171018
39	21	15	Hs~Ref:NM_004439.4~CAT:PV3840~RFU:8074.78	HA20457~B39R15C21	15880	46030	110	65535	64063	5957	9	49	49	294	1223	415	100	100	81	342	612	1032	168	125	125	126	12	9	100	100	0	301.779	131.446	301.836	227.509	2.452	167.941	0.108	80	576	100	65703	64501	8.237	65486	217	64014	487	5125035
32	18	15	Hs~Ref:NM_005158.2~CAT:PV3266~RFU:137.65	HA20457~B32R15C18	19750	37000	110	65535	64037	8080	12	47	47	226	1574	696	100	100	86	477	504	232	46	77	77	81	27	33	100	100	0	163.720	149.859	163.720	154.867	1.527	142.359	0.471	80	548	100	65888	64417	7.355	65488	400	63990	427	5122981
26	22	15	Hs~Ref:NM_004431.1~CAT:PV3688~RFU:16513.21	HA20457~B26R15C22	11520	32560	110	65535	63718	5178	8	47	47	108	472	437	100	100	81	1189	3587	4328	120	105	105	106	9	8	100	100	0	60.413	18.286	60.881	46.490	4.192	21.049	0.285	80	570	100	66572	67153	5.917	65488	1084	63671	3482	5097471
44	16	15	Hs~Ref:NM_001006943.1~CAT:PV3844~RFU:18174.29	HA20457~B44R15C16	19420	50500	110	65535	63623	6022	9	49	49	196	1251	638	100	100	56	397	437	201	45	113	113	120	23	19	100	98	0	230.585	196.216	229.663	220.878	1.600	198.406	0.598	80	547	100	65770	63898	7.849	65486	284	63574	324	5089803
12	10	16	Hs~MGC:BC065912.1~uORF:IOH40442~RFU:15975.63	HA20457~B12R16C10	18020	14720	110	65535	62945	10251	16	340	340	5240	11937	227	98	96	92	350	453	524	115	119	119	142	84	59	100	92	0	282.229	187.440	281.013	231.673	1.695	208.725	0.128	80	555	100	65426	62939	8.141	65195	231	62605	334	5035631
34	5	16	Hs~Ref:NP_005408~CAT:P3044~RFU:39.3	HA20457~B34R16C05	8110	41750	110	65535	60540	12145	20	508	508	3405	8185	240	100	97	76	1133	4322	6504	150	144	144	183	344	187	86	62	0	65.750	14.369	63.379	39.318	3.828	12.380	0.254	80	586	100	66016	64210	6.039	65027	989	60032	4178	4843212
12	9	16	Hs~MGC:BC065912.1~uORF:IOH40442~RFU:17446.51	HA20457~B12R16C09	17820	14720	110	65535	60420	14509	24	3001	3001	5455	10503	192	95	95	81	461	1066	2221	208	147	147	186	327	175	47	18	0	199.153	62.480	168.555	124.210	2.388	102.953	0.056	80	563	100	62848	58338	7.638	62534	314	57419	919	4833582
17	20	15	Hs~Ref:NM_001721.2~CAT:PV3371~RFU:237.99	HA20457~B17R15C20	6530	23570	110	65343	64734	1089	1	49	49	279	1430	512	100	100	42	646	739	567	76	105	105	111	39	35	100	100	0	120.691	102.027	118.645	110.796	1.325	88.145	0.285	80	548	100	65835	65319	6.915	65294	541	64685	634	5178706
9	20	15	Hs~Ref:NM_001014796.1~CAT:PV3870~RFU:11491.82	HA20457~B09R15C20	6520	14520	110	65023	64574	1172	1	49	49	246	914	371	100	100	23	372	454	270	59	93	93	106	44	41	100	100	0	232.882	178.740	232.984	204.555	1.544	203.363	0.501	80	567	100	65253	64886	7.863	64974	279	64525	361	5165930
23	5	7	Hs~Ref:NM_005248.1~uORF:IOH21152~RFU:8875.55	HA20457~B23R07C05	12560	26430	110	64922	60221	10006	16	50	50	140	347	247	100	100	33	458	1784	3222	180	117	117	119	22	18	100	100	0	190.240	36.095	176.863	92.577	3.505	42.347	0.142	80	590	100	65213	61838	7.572	64872	341	60171	1667	4817711
23	6	7	Hs~Ref:NM_005248.1~uORF:IOH21152~RFU:8643.01	HA20457~B23R07C06	12760	26430	110	64468	63102	3280	5	50	50	135	529	391	100	100	22	364	2003	7462	372	122	122	132	44	33	100	100	0	266.190	33.520	266.579	164.000	3.152	35.712	0.033	80	563	100	64660	64933	8.056	64418	242	63052	1881	5048185
37	20	15	Hs~Ref:AAH59394~CAT:P2907~RFU:125.55	HA20457~B37R15C20	6680	46070	110	63932	62212	4399	7	48	48	143	515	360	100	100	2	456	985	1484	150	129	129	134	35	26	100	98	0	195.364	72.621	194.273	136.991	2.604	66.725	0.080	80	566	100	64211	63020	7.610	63884	327	62164	856	4976970
9	19	15	Hs~Ref:NM_001014796.1~CAT:PV3870~RFU:11954.06	HA20457~B09R15C19	6320	14520	110	63823	63774	953	1	50	50	245	998	407	100	100	2	356	614	1133	184	90	90	99	36	36	100	100	0	239.748	121.611	238.661	197.122	1.925	118.181	0.131	80	568	100	64039	64248	7.905	63773	266	63724	524	5101934
40	14	15	Hs~Ref:NM_005157.2~CAT:PV3865~RFU:96.73	HA20457~B40R15C14	19000	46020	110	62901	61352	4832	7	47	47	125	502	401	100	100	0	631	1148	1858	161	104	104	106	17	16	100	100	0	119.268	58.721	116.538	92.530	1.984	60.656	0.195	80	550	100	63381	62349	6.898	62854	527	61305	1044	4908135
37	19	15	Hs~Ref:AAH59394~CAT:P2907~RFU:123.36	HA20457~B37R15C19	6480	46080	110	61849	61707	2034	3	48	48	111	361	325	100	100	0	486	602	335	55	124	124	128	33	25	100	100	0	170.721	128.994	171.141	145.853	1.551	135.837	0.577	80	586	100	62163	62137	7.415	61801	362	61659	478	4936555
26	21	15	Hs~Ref:NM_004431.1~CAT:PV3688~RFU:16024.93	HA20457~B26R15C21	11320	32560	110	60875	43309	26240	60	47	47	74	148	200	100	100	36	770	5819	10682	183	104	104	106	13	12	100	100	0	91.333	7.570	29.442	29.674	4.596	7.553	0.271	80	564	100	61494	48977	6.513	60828	666	43262	5715	3464717
40	13	15	Hs~Ref:NM_005157.2~CAT:PV3865~RFU:98.59	HA20457~B40R15C13	18800	46020	110	59906	58617	5480	9	47	47	151	586	388	100	100	0	606	762	904	118	111	111	114	21	18	100	100	0	120.927	89.969	117.472	109.313	1.563	89.763	0.173	80	554	100	60354	59221	6.918	59859	495	58570	651	4689349
21	20	18	Hs~Ref:NM_002350.1~N/A~RFU:17318.64	HA20457~B21R18C20	6590	28640	110	58604	51515	12810	24	48	48	66	113	171	100	100	0	541	565	126	22	257	257	253	36	14	100	98	0	206.183	167.101	182.644	169.318	1.513	189.573	0.681	80	556	100	58840	51775	7.688	58556	284	51467	308	4121202
31	2	16	Hs~Ref:NM_001715.2~CAT:PV3683~RFU:93.01	HA20457~B31R16C02	11990	37230	110	56542	48857	16413	33	48	48	1391	6429	462	98	92	0	6221	16348	18994	116	107	107	109	13	11	100	100	0	9.240	3.005	7.261	7.615	4.969	3.511	0.264	80	491	100	62608	65050	3.208	56494	6114	48809	16241	3908580
46	15	19	Hs~Ref:NM_007026.1~uORF:IOH21130~RFU:27433.04	HA20457~B46R19C15	10250	55850	110	55805	55021	4022	7	49	49	151	435	288	100	100	0	647	689	99	14	208	208	214	34	15	100	100	0	127.007	114.287	124.440	115.917	1.246	119.516	0.715	80	577	100	56195	55453	6.989	55756	439	54972	481	4401710
21	19	18	Hs~Ref:NM_002350.1~N/A~RFU:12059.15	HA20457~B21R18C19	6390	28650	110	55166	50086	12218	24	47	47	58	91	156	100	100	0	600	638	146	22	250	250	254	29	11	100	100	0	157.483	128.966	149.142	130.566	1.583	148.963	0.713	80	558	100	55469	50427	7.299	55119	350	50039	388	4006889
23	18	15	Hs~Ref:NM_005233.3~CAT:PV3359~RFU:143.01	HA20457~B23R15C18	15160	28030	110	54954	50917	12342	24	48	48	56	45	80	100	100	0	1021	2422	2625	108	123	123	150	82	54	98	88	0	61.143	22.127	50.560	46.654	3.386	21.090	0.452	80	574	100	55804	53168	5.934	54906	898	50869	2299	4073327
23	17	15	Hs~Ref:NM_005233.3~CAT:PV3359~RFU:155.02	HA20457~B23R15C17	14960	28030	110	54134	51134	10144	19	49	49	53	27	50	100	100	0	951	6908	15003	217	116	116	119	18	15	100	100	2	64.772	7.521	48.860	40.347	5.421	6.033	0.183	80	577	100	54920	57877	6.017	54085	835	51085	6792	4090748
31	1	16	Hs~Ref:NM_001715.2~CAT:PV3683~RFU:106.96	HA20457~B31R16C01	11810	37210	110	53409	44817	21937	48	47	47	2195	9294	423	87	80	0	10066	21976	26841	122	107	107	121	116	95	95	91	20	5.358	2.047	4.817	5.825	6.366	2.499	0.239	80	537	100	63321	66639	2.422	53362	9959	44770	21869	3585374
21	18	15	Hs~Ref:NM_004441.3~CAT:PV3786~RFU:18861.61	HA20457~B21R15C18	6190	28050	110	51698	51595	4746	9	48	48	73	147	201	100	100	0	483	3031	10025	330	122	122	129	26	20	100	100	0	143.075	17.720	153.291	100.751	3.576	20.020	0.049	80	557	100	52011	54456	7.161	51650	361	51547	2909	4127619
46	16	19	Hs~Ref:NM_007026.1~uORF:IOH21130~RFU:26581.1	HA20457~B46R19C16	10450	55850	110	51657	51042	4634	9	48	48	130	420	323	100	100	0	815	3527	9932	281	208	208	209	20	9	100	100	0	85.023	15.364	83.847	54.678	3.172	19.567	0.052	80	538	100	52216	54313	6.410	51609	607	50994	3319	4083374
21	17	15	Hs~Ref:NM_004441.3~CAT:PV3786~RFU:17826.45	HA20457~B21R15C17	5990	28060	110	50698	50221	4650	9	48	48	73	164	224	100	100	0	341	790	1393	176	116	116	120	20	16	100	100	0	225.111	74.441	230.420	154.144	2.685	83.113	0.128	80	574	100	50875	50847	7.814	50650	225	50173	674	4017653
27	2	16	Hs~Ref:NM_004444.2~CAT:PV3251~RFU:172.06	HA20457~B27R16C02	12020	32730	110	50179	48222	8481	17	48	48	70	120	171	100	100	0	655	1448	2228	153	104	104	105	8	7	100	100	0	90.982	35.844	89.213	71.486	2.869	40.632	0.193	80	558	100	50682	49518	6.508	50131	551	48174	1344	3857790
45	1	16	Hs~Ref:NM_005157.2~CAT:P3049~RFU:445.41	HA20457~B45R16C01	2890	55250	110	48947	41998	14049	33	46	46	77	221	287	100	100	0	896	921	164	17	178	178	180	19	10	100	100	0	68.107	56.463	58.083	52.772	1.601	61.528	0.845	80	608	100	49619	42695	6.090	48901	718	41952	743	3359808
9	18	15	Hs~Ref:NM_000222.1~CAT:P3081~RFU:156.11	HA20457~B09R15C18	6120	14520	110	46434	46216	2545	5	49	49	193	746	386	100	100	0	506	513	46	8	90	90	94	27	28	100	100	0	111.502	109.142	111.573	109.506	1.145	120.868	0.766	80	568	100	46801	46590	6.801	46385	416	46167	423	3697268
27	1	16	Hs~Ref:NM_004444.2~CAT:PV3251~RFU:187.87	HA20457~B27R16C01	11830	32730	110	46382	44449	9934	22	48	48	74	146	197	100	100	0	3040	11713	18787	160	107	107	111	26	23	100	100	0	15.797	3.826	16.453	11.163	4.206	3.628	0.191	80	578	100	49267	56007	3.982	46334	2933	44401	11606	3555952
22	7	19	Hs~MGC:BC016652.1~N/A~RFU:9979.54	HA20457~B22R19C07	8450	28840	110	45031	43390	6738	15	48	48	70	166	237	100	100	0	385	394	63	15	113	113	113	10	8	100	100	0	165.379	154.242	160.677	155.541	1.294	165.254	0.783	80	583	100	45255	43623	7.370	44983	272	43342	281	3471208
22	8	19	Hs~MGC:BC016652.1~N/A~RFU:9734.93	HA20457~B22R19C08	8650	28830	110	44699	43343	8257	19	48	48	99	327	330	100	100	0	375	444	476	107	117	117	118	10	8	100	100	0	173.066	132.401	169.025	158.002	1.543	137.426	0.269	80	557	100	44909	43622	7.435	44651	258	43295	327	3467448
12	13	16	Hs~Ref:NM_002031.2~uORF:IOH56137~RFU:6980.1	HA20457~B12R16C13	18630	14700	110	44157	41728	10981	26	47	47	59	95	161	100	100	0	352	339	46	13	80	80	81	9	11	100	100	0	162.169	160.930	163.009	157.002	1.215	169.327	0.878	80	568	100	44382	41940	7.341	44110	272	41681	259	3338242
42	2	16	Hs~Ref:NM_002031.1~CAT:PV3874~RFU:7349.33	HA20457~B42R16C02	7610	50740	110	43925	43903	7006	15	191	191	391	520	132	100	100	0	373	975	3236	331	169	169	184	99	53	98	56	0	214.382	54.233	219.916	154.126	2.575	50.835	0.029	80	514	100	43938	44518	7.744	43734	204	43712	806	3512245
42	1	16	Hs~Ref:NM_002031.1~CAT:PV3874~RFU:8691.41	HA20457~B42R16C01	7410	50740	110	43458	43302	6561	15	233	233	402	691	171	100	100	0	323	561	1331	237	176	176	201	70	34	98	63	0	294.048	111.868	299.091	241.428	2.167	141.664	0.040	80	570	100	43372	43454	8.200	43225	147	43069	385	3464180
45	2	16	Hs~Ref:NM_005157.2~CAT:P3049~RFU:418.12	HA20457~B45R16C02	3100	55250	110	42508	41009	7669	18	46	46	69	132	191	100	100	0	881	856	146	17	174	174	176	17	9	100	100	0	60.059	60.063	61.281	61.360	1.356	60.423	0.848	80	568	100	43169	41645	5.908	42462	707	40963	682	3280684
14	3	8	Hs~Ref:NM_005356.2~N/A~RFU:33396.29	HA20457~B14R08C03	7580	17650	110	41921	42615	6199	14	1654	1654	5645	7919	140	100	100	0	359	405	406	100	149	149	170	80	47	100	90	0	191.748	160.004	202.243	188.444	1.544	189.192	0.110	80	564	100	40477	41217	7.583	40267	210	40961	256	3409215
30	22	15	Hs~Ref:NM_004442.3~CAT:PV3625~RFU:11116.07	HA20457~B30R15C22	11510	37060	110	41723	37859	10773	28	48	48	74	130	175	100	100	0	2142	14895	21908	147	107	107	113	30	26	100	100	8	20.479	2.557	16.426	12.634	9.460	1.988	0.135	80	589	100	43710	52599	4.356	41675	2035	37811	14788	3028698
41	15	15	Hs~Ref:NM_004438.1~CAT:PV3651~RFU:19646.58	HA20457~B41R15C15	5740	50590	110	39093	36291	10096	27	48	48	183	755	412	100	100	0	396	401	51	12	154	154	174	45	25	100	100	0	161.343	146.733	155.523	141.334	1.516	172.933	0.700	80	584	100	39287	36490	7.334	39045	242	36243	247	2903244
9	17	15	Hs~Ref:NM_000222.1~CAT:P3081~RFU:144.1	HA20457~B09R15C17	5920	14520	110	38171	38941	4373	11	48	48	183	846	462	100	100	0	474	487	62	12	93	93	99	34	34	100	100	0	100.060	98.713	99.991	99.335	1.165	62.824	0.012	80	575	100	38504	39287	6.645	38123	381	38893	394	3115316
30	21	15	Hs~Ref:NM_004442.3~CAT:PV3625~RFU:10117.19	HA20457~B30R15C21	11310	37060	110	38001	36583	9381	25	48	48	70	100	142	100	100	0	5404	9975	12890	129	107	107	113	26	23	100	100	0	7.165	3.702	7.217	9.010	5.025	3.399	0.301	80	586	100	43250	46403	2.841	37953	5297	36535	9868	2926649
35	1	20	Hs~Ref:NM_001570.2~N/A~RFU:9867	HA20457~B35R20C01	11850	42510	110	36830	36460	6786	18	48	48	75	129	172	100	100	0	341	456	566	124	128	128	134	23	17	100	100	0	172.685	111.012	174.965	148.237	1.801	105.818	0.131	80	580	100	36995	36740	7.432	36782	213	36412	328	2916770
41	22	15	Hs~Ref:NP_005239~CAT:P3041~RFU:31.62	HA20457~B41R15C22	7140	50580	110	35338	33772	8775	25	49	49	157	331	210	100	100	0	312	380	409	107	159	159	216	129	59	80	13	0	230.647	152.593	227.583	205.951	2.014	176.456	0.122	80	590	100	35442	33944	7.850	35289	153	33723	221	2701754
41	21	15	Hs~Ref:NP_005239~CAT:P3041~RFU:26.04	HA20457~B41R15C21	6940	50570	110	35327	31099	9715	31	48	48	76	111	146	100	100	0	344	430	305	70	156	156	173	58	33	98	95	0	187.654	113.325	170.016	134.458	1.927	126.560	0.358	80	594	100	35467	31325	7.552	35279	188	31051	274	2487882
45	3	8	Hs~Ref:NM_005235.1~N/A~RFU:20265.07	HA20457~B45R08C03	3290	53650	110	34171	33305	4048	12	48	48	159	556	349	100	100	0	825	2554	6740	263	201	201	207	35	16	100	100	0	54.684	14.134	48.142	37.746	2.586	14.199	0.089	80	574	100	34747	35610	5.773	34123	624	33257	2353	2664403
12	14	16	Hs~Ref:NM_002031.2~uORF:IOH56137~RFU:5519.9	HA20457~B12R16C14	18830	14700	110	33957	31051	8664	27	47	47	53	45	84	100	100	0	307	368	293	79	81	81	82	9	10	100	100	0	150.044	108.028	139.208	119.834	1.667	114.768	0.412	80	558	100	34136	31291	7.229	33910	226	31004	287	2484094
35	2	20	Hs~Ref:NM_001570.2~N/A~RFU:10782.75	HA20457~B35R20C02	12050	42510	110	33365	32192	8348	25	49	49	74	102	137	100	100	0	328	432	599	138	122	122	133	27	20	100	100	0	161.728	103.687	162.137	137.940	1.899	138.584	0.106	80	577	100	33522	32453	7.337	33316	206	32143	310	2575386
14	4	8	Hs~Ref:NM_005356.2~N/A~RFU:33856.99	HA20457~B14R08C04	7770	17670	110	31922	27667	9964	36	210	210	6701	11880	177	86	67	0	297	292	33	11	102	102	149	83	55	100	88	0	162.626	144.511	162.531	134.348	1.532	239.888	0.499	80	541	100	31907	27647	7.345	31712	195	27457	190	2213320
39	11	7	Hs~Ref:NM_001721.2~uORF:IOH11645~RFU:9219.68	HA20457~B39R07C11	13880	44440	110	31713	30598	6820	22	48	48	84	278	330	100	100	0	395	439	193	43	114	114	121	37	30	100	100	0	112.687	94.000	109.804	98.404	1.497	101.174	0.319	80	567	100	31946	30875	6.816	31665	281	30550	325	2447878
4	22	15	Hs~Ref:NP_694592~CAT:P3042~RFU:58.95	HA20457~B04R15C22	20400	5500	110	31233	30942	2674	8	51	51	140	266	190	100	100	0	643	659	107	16	251	251	259	46	17	100	100	0	79.546	75.713	79.888	77.314	1.257	80.207	0.627	80	544	100	31574	31299	6.314	31182	392	30891	408	2475335
39	12	7	Hs~Ref:NM_001721.2~uORF:IOH11645~RFU:7587.43	HA20457~B39R07C12	14070	44430	110	30717	30075	8277	27	48	48	117	485	414	100	100	0	410	457	190	41	112	112	117	37	31	100	100	0	102.916	87.035	98.685	89.618	1.523	92.031	0.611	80	556	100	30967	30372	6.685	30669	298	30027	345	2406008
45	4	8	Hs~Ref:NM_005235.1~N/A~RFU:19807.48	HA20457~B45R08C04	3480	53650	110	29733	29721	3440	11	47	47	112	419	374	100	100	0	618	635	73	11	194	194	198	26	13	100	100	0	70.014	67.288	68.968	67.726	1.248	68.239	0.848	80	536	100	30110	30115	6.130	29686	424	29674	441	2377688
4	21	15	Hs~Ref:NP_694592~CAT:P3042~RFU:63.32	HA20457~B04R15C21	20200	5500	110	28087	27860	2839	10	50	50	148	333	225	100	100	0	566	575	52	9	229	229	237	73	30	100	100	0	83.196	80.376	76.709	80.905	1.223	86.306	0.802	80	582	100	28374	28156	6.378	28037	337	27810	346	2228765
41	16	15	Hs~Ref:NM_004438.1~CAT:PV3651~RFU:19233.63	HA20457~B41R15C16	5940	50580	110	26203	26244	4908	18	49	49	148	265	179	100	100	0	336	379	154	40	161	161	179	44	24	100	100	0	149.451	120.161	153.633	133.158	1.571	136.294	0.487	80	576	100	26329	26413	7.224	26154	175	26195	218	2099508
32	20	15	Hs~Ref:NM_005157.2~CAT:PV3863~RFU:114.4	HA20457~B32R15C20	20140	36980	110	24585	22672	8794	38	47	47	51	38	74	100	100	0	599	680	678	99	75	75	76	10	13	97	97	0	46.828	37.397	46.804	48.308	2.777	42.390	0.356	80	520	100	25062	23230	5.549	24538	524	22625	605	1813790
32	19	15	Hs~Ref:NM_005157.2~CAT:PV3863~RFU:103.24	HA20457~B32R15C19	19940	36980	110	23825	22400	10051	44	47	47	55	69	125	100	100	0	548	644	589	91	77	77	81	14	17	100	100	0	50.484	39.423	49.342	39.693	1.898	48.303	0.356	80	538	100	24249	22920	5.658	23778	471	22353	567	1792025
17	3	9	Hs~Ref:NM_004383.1~uORF:IOH29870~RFU:24932.31	HA20457~B17R09C03	3120	22380	110	22621	22679	2611	11	47	47	160	729	455	100	100	0	494	497	60	12	117	117	128	164	128	100	80	0	59.878	59.558	60.502	59.949	1.198	62.673	0.902	80	576	100	22951	23012	5.904	22574	377	22632	380	1814354
38	18	15	Hs~Ref:NM_006206.3~CAT:PV3811~RFU:9197.36	HA20457~B38R15C18	10750	46030	110	22468	21362	6046	28	47	47	59	108	183	100	100	0	385	727	798	109	232	232	244	75	30	100	52	0	146.542	43.061	116.298	81.285	2.608	39.013	0.177	80	522	100	22574	21810	7.195	22421	153	21315	495	1708923
38	17	15	Hs~Ref:NM_006206.3~CAT:PV3811~RFU:9317.34	HA20457~B38R15C17	10560	46030	110	21656	20538	4689	22	47	47	50	23	46	100	100	0	345	343	38	11	203	203	205	19	9	100	100	0	152.176	146.364	150.382	149.145	1.376	153.544	0.746	80	564	100	21751	20631	7.250	21609	142	20491	140	1643023
8	16	5	Hs~Ref:NM_004431.1~N/A~RFU:13310.04	HA20457~B08R05C16	19170	7970	110	20559	20432	3560	17	47	47	67	73	108	100	100	0	484	472	49	10	120	120	139	50	35	100	100	0	56.352	57.912	59.046	57.469	1.180	61.530	0.881	80	568	100	20876	20737	5.816	20512	364	20385	352	1634536
16	16	5	Hs~Ref:NM_001721.2~N/A~RFU:51120.72	HA20457~B16R05C16	19240	17010	110	19396	19374	3841	19	1269	1269	5045	6559	130	97	90	0	303	298	28	9	129	129	141	71	50	98	82	0	104.178	107.130	102.603	105.648	1.332	99.770	0.811	80	571	100	18301	18274	6.703	18127	174	18105	169	1549881
17	4	9	Hs~Ref:NM_004383.1~uORF:IOH29870~RFU:26874.45	HA20457~B17R09C04	3320	22380	110	18191	17999	1835	10	48	48	126	447	354	100	100	0	396	405	49	12	116	116	137	217	158	93	1	0	64.796	62.114	63.914	62.620	1.194	69.224	0.037	80	577	100	18423	18240	6.018	18143	280	17951	289	1439924
48	17	15	Hs~Ref:NM_005232.1~CAT:PV3841~RFU:15288.32	HA20457~B48R15C17	19710	55020	110	18159	16657	4801	28	46	46	49	25	51	100	100	0	499	913	1749	191	149	149	154	31	20	100	100	0	51.751	21.742	51.868	36.303	2.536	25.174	0.103	80	564	100	18463	17375	5.694	18113	350	16611	764	1332587
8	15	5	Hs~Ref:NM_004431.1~N/A~RFU:12417.22	HA20457~B08R05C15	18970	7970	110	17895	17286	3314	19	48	48	55	65	118	100	100	0	500	498	65	13	113	113	122	39	31	100	100	0	46.116	44.774	46.179	44.518	1.257	46.344	0.906	80	578	100	18234	17623	5.527	17847	387	17238	385	1382907
48	18	15	Hs~Ref:NM_005232.1~CAT:PV3841~RFU:16236.98	HA20457~B48R15C18	19900	55020	110	17587	16559	4458	26	45	45	47	21	44	100	100	0	432	438	45	10	147	147	148	13	8	100	100	0	61.551	56.749	57.139	54.741	1.418	62.249	0.792	80	566	100	17827	16805	5.944	17542	285	16514	291	1324735
17	6	16	Hs~Ref:NM_005781.2~CAT:PV4807~RFU:18381	HA20457~B17R16C06	3720	23780	110	17246	16661	3148	18	48	48	78	386	494	100	100	0	312	2648	8530	322	102	102	103	9	8	100	100	0	81.895	6.525	70.474	39.836	3.891	5.246	0.065	80	558	100	17408	19159	6.356	17198	210	16613	2546	1332904
16	15	5	Hs~Ref:NM_001721.2~N/A~RFU:50101.53	HA20457~B16R05C15	19060	17020	110	16252	16351	1658	10	259	259	5372	6415	119	100	96	0	298	487	1136	233	113	113	148	80	54	100	81	0	86.449	43.027	85.127	77.082	1.844	48.939	0.047	80	545	100	16178	16466	6.434	15993	185	16092	374	1308046
32	16	15	Hs~Ref:NM_006575.2~CAT:PV3682~RFU:14332.22	HA20457~B32R15C16	19340	37000	110	14099	12775	5795	45	47	47	53	52	98	100	100	0	396	378	62	16	76	76	78	14	17	100	100	0	43.912	42.146	45.057	34.758	2.295	48.954	0.775	80	546	100	14372	13030	5.457	14052	320	12728	302	1021978
3	11	12	Hs~Ref:NM_000061.1~uORF:IOH21063~RFU:23501.09	HA20457~B03R12C11	13650	4930	110	13797	13972	1547	11	48	48	65	108	166	100	100	0	605	685	779	113	95	95	101	32	31	100	100	0	26.959	23.600	28.241	27.177	1.465	22.676	0.195	80	564	100	14259	14514	4.753	13749	510	13924	590	1117723
47	13	14	Hs~Ref:NM_005206.2~uORF:IOH1805~RFU:12802.4	HA20457~B47R14C13	14380	54810	110	13768	13340	2773	20	46	46	51	42	82	100	100	0	436	443	43	9	143	143	144	12	8	100	100	0	46.833	44.313	44.794	43.710	1.253	45.755	0.867	80	548	100	14015	13594	5.549	13722	293	13294	300	1067193
3	12	12	Hs~Ref:NM_000061.1~uORF:IOH21063~RFU:23245.63	HA20457~B03R12C12	13840	4920	110	13479	13200	2178	16	47	47	89	292	328	100	100	0	614	619	50	8	96	96	111	84	75	100	100	0	25.931	25.149	24.874	24.904	1.225	26.769	0.810	80	557	100	13950	13676	4.697	13432	518	13153	523	1055984
36	22	15	Hs~Ref:NM_002609.2~CAT:P3082~RFU:27.9	HA20457~B36R15C22	20620	41470	110	12403	12245	1851	15	47	47	92	154	167	100	100	0	259	256	30	11	81	81	100	67	67	97	95	0	69.416	69.703	68.926	70.030	1.244	80.226	0.714	80	590	100	12534	12373	6.117	12356	178	12198	175	979621
47	14	14	Hs~Ref:NM_005206.2~uORF:IOH1805~RFU:12400.66	HA20457~B47R14C14	14580	54800	110	12139	11598	2256	19	47	47	64	98	153	100	100	0	492	2015	6588	326	149	149	178	62	34	100	100	0	35.254	6.190	33.496	22.756	2.988	4.475	0.049	80	556	100	12435	13417	5.140	12092	343	11551	1866	927828
36	21	15	Hs~Ref:NM_002609.2~CAT:P3082~RFU:30.69	HA20457~B36R15C21	20420	41470	110	11631	11729	2334	19	48	48	137	251	183	100	100	0	255	255	24	9	96	96	120	77	64	100	52	0	72.849	73.465	72.513	72.298	1.334	91.780	0.562	80	576	100	11742	11840	6.187	11583	159	11681	159	938313
32	15	15	Hs~Ref:NM_006575.2~CAT:PV3682~RFU:9333.15	HA20457~B32R15C15	19150	36990	110	11178	11868	5340	44	48	48	52	28	53	100	100	0	357	367	108	29	81	81	98	39	39	100	98	0	40.326	41.329	45.870	38.935	1.651	53.412	0.624	80	544	100	11406	12106	5.334	11130	276	11820	286	949424
29	1	16	Hs~Ref:NM_005157.2~CAT:PV3864~RFU:61.38	HA20457~B29R16C01	2880	37250	110	10255	10375	2704	26	47	47	53	60	113	100	100	0	585	569	74	13	133	133	136	16	11	100	100	0	22.584	23.688	24.948	23.327	1.343	25.286	0.777	80	570	100	10660	10764	4.497	10208	452	10328	436	830027
45	1	8	Hs~Ref:NM_004383.1~N/A~RFU:39643.79	HA20457~B45R08C01	2890	53650	110	9946	9903	1058	10	48	48	151	478	316	100	100	0	639	641	37	5	247	247	274	105	38	100	100	0	25.250	25.013	25.528	24.998	1.159	27.657	0.747	80	581	100	10290	10249	4.658	9898	392	9855	394	792210
17	5	16	Hs~Ref:NM_005781.2~CAT:PV4807~RFU:16927.95	HA20457~B17R16C05	3530	23790	110	9742	9446	1776	18	49	49	53	32	60	100	100	0	229	251	92	36	107	107	113	29	25	97	97	0	79.451	65.257	78.908	72.651	1.643	72.865	0.536	80	557	100	9815	9541	6.312	9693	122	9397	144	755671
45	2	8	Hs~Ref:NM_004383.1~N/A~RFU:40099.34	HA20457~B45R08C02	3080	53650	110	9552	9422	1553	16	50	50	241	756	313	100	100	0	694	769	216	28	274	274	311	172	55	100	73	0	22.624	18.933	22.750	20.081	1.665	27.127	0.251	80	548	100	9922	9867	4.500	9502	420	9372	495	753768
6	15	5	Hs~Ref:NM_016507.1~N/A~RFU:10770.74	HA20457~B06R05C15	9990	8030	110	9173	9425	1660	17	48	48	196	574	292	100	100	0	445	440	64	14	112	112	126	43	34	100	98	0	27.402	28.588	27.827	28.957	1.315	29.823	0.782	80	570	100	9458	9705	4.776	9125	333	9377	328	754036
39	5	8	Hs~Ref:NM_002530.1~N/A~RFU:19348.96	HA20457~B39R08C05	12680	44640	110	8589	8369	1253	14	48	48	83	160	192	100	100	0	492	634	523	82	130	130	134	33	24	100	100	0	23.594	16.510	23.886	19.502	1.733	18.603	0.367	80	557	100	8903	8825	4.560	8541	362	8321	504	669489
8	14	15	Hs~Ref:NM_000061.1~CAT:PV3363~RFU:377.73	HA20457~B08R15C14	18780	9970	110	8547	8731	1853	21	47	47	47	6	12	100	100	0	959	998	317	31	94	94	96	9	9	100	100	0	9.827	9.606	9.736	9.739	1.387	10.298	0.735	80	568	100	9365	9588	3.297	8500	865	8684	904	698519
6	13	5	Hs~Ref:NM_004226.1~N/A~RFU:38091.7	HA20457~B06R05C13	9590	8040	110	8543	8601	1393	16	56	56	965	1599	165	100	100	0	380	442	322	72	134	134	190	99	52	100	100	0	34.500	27.744	34.967	31.645	1.545	35.919	0.282	80	568	100	8733	8853	5.109	8487	246	8545	308	688112
8	13	15	Hs~Ref:NM_000061.1~CAT:PV3363~RFU:423.58	HA20457~B08R15C13	18580	9970	110	8454	8295	1744	21	47	47	49	25	51	100	100	0	898	885	105	11	92	92	95	19	20	100	100	0	10.431	10.401	10.628	10.304	1.379	11.108	0.816	80	566	100	9213	9041	3.383	8407	806	8248	793	663609
29	2	16	Hs~Ref:NM_005157.2~CAT:PV3864~RFU:61.38	HA20457~B29R16C02	3070	37240	110	8401	8380	2445	29	47	47	58	114	196	100	100	0	521	629	415	65	132	132	134	15	11	100	100	0	21.476	16.767	21.703	18.330	1.706	19.422	0.429	80	547	100	8743	8830	4.425	8354	389	8333	497	670407
10	9	16	Hs~Ref:NM_001008711.1~uORF:IOH59712~RFU:44639.74	HA20457~B10R16C09	8790	14730	110	8366	8314	1726	20	49	49	821	1700	207	100	100	0	350	351	29	8	95	95	120	61	50	100	100	0	32.616	32.285	31.553	31.792	1.229	44.294	0.663	80	568	100	8572	8521	5.027	8317	255	8265	256	665117
20	13	16	Hs~Ref:NM_006254.3~uORF:IOH26352~RFU:30987.72	HA20457~B20R16C13	18650	23680	110	8229	8600	1257	14	564	564	790	883	111	100	100	0	484	483	34	7	180	180	167	79	47	100	98	0	25.214	26.521	25.900	26.419	1.215	26.272	0.792	80	558	100	7969	8339	4.656	7665	304	8036	303	688008
39	6	8	Hs~Ref:NM_002530.1~N/A~RFU:21406.25	HA20457~B39R08C06	12870	44640	110	8156	8061	1194	14	48	48	100	320	320	100	100	0	288	371	202	54	128	128	141	52	36	100	100	0	50.675	32.975	50.828	39.389	1.808	36.424	0.346	80	541	100	8268	8256	5.663	8108	160	8013	243	644906
10	10	16	Hs~Ref:NM_001008711.1~uORF:IOH59712~RFU:45573.14	HA20457~B10R16C10	8980	14730	110	7952	8197	1660	20	50	50	961	2011	209	100	100	0	348	371	53	14	97	97	123	63	51	100	100	0	31.482	29.734	30.965	29.605	1.270	40.204	0.715	80	523	100	8153	8421	4.976	7902	251	8147	274	655734
6	16	5	Hs~Ref:NM_016507.1~N/A~RFU:10486.9	HA20457~B06R05C16	10190	8030	110	7893	7964	1133	14	48	48	62	84	135	100	100	0	571	4938	12851	260	109	109	123	63	51	100	100	0	16.981	1.639	17.030	8.431	4.356	0.194	0.069	80	568	100	8307	12745	4.086	7845	462	7916	4829	637138
29	21	21	Hs~Ref:NP_000600.1~CAT_PHC1361~RFU:2832.96	HA20457~B29R21C21	6880	38230	110	7111	7238	1027	14	51	51	178	419	235	100	100	0	1995	2011	158	7	148	148	162	108	66	100	100	0	3.822	3.858	3.792	3.833	1.209	4.078	0.846	80	557	100	8907	9050	1.934	7060	1847	7187	1863	579060
6	14	5	Hs~Ref:NM_004226.1~N/A~RFU:38756.55	HA20457~B06R05C14	9790	8030	110	7008	6984	1124	16	57	57	862	1232	142	100	100	0	355	357	31	8	123	123	173	85	49	100	100	0	29.961	29.603	29.402	29.406	1.193	33.501	0.635	80	569	100	7183	7161	4.905	6951	232	6927	234	558691
18	18	15	Hs~Ref:NM_005607.1~CAT:PV3832~RFU:6990.33	HA20457~B18R15C18	10650	23520	110	6690	6591	1319	20	49	49	94	131	139	100	100	0	225	229	28	12	97	97	124	67	54	100	42	0	51.883	49.561	49.282	49.236	1.294	62.234	0.374	80	568	100	6769	6674	5.697	6641	128	6542	132	527310
39	21	3	Hs~Ref:NM_014481.2~uORF:IOH4887~RFU:60296.94	HA20457~B39R03C21	15860	43630	110	6429	6423	1143	17	49	49	200	431	215	100	100	0	1527	1474	158	10	166	166	222	154	69	100	100	0	4.688	4.873	4.912	4.827	1.216	5.071	0.853	80	575	100	7741	7682	2.229	6380	1361	6374	1308	513865
29	22	21	Hs~Ref:NP_000600.1~CAT_PHC1361~RFU:2415.36	HA20457~B29R21C22	7070	38210	110	6409	6253	1161	18	49	49	162	473	291	100	100	0	2073	2048	110	5	128	128	166	171	103	100	100	0	3.270	3.231	3.283	3.179	1.257	3.494	0.812	80	566	100	8305	8124	1.709	6360	1945	6204	1920	500244
35	22	19	Hs~Ref:NM_002037.1~N/A~RFU:34855.84	HA20457~B35R19C22	16050	42290	110	6193	6367	827	12	47	47	124	332	267	100	100	0	284	290	25	8	131	131	135	19	14	100	100	0	40.170	39.748	40.275	39.727	1.171	39.250	0.819	80	570	100	6299	6479	5.328	6146	153	6320	159	509379
35	21	19	Hs~Ref:NM_002037.1~N/A~RFU:31562.5	HA20457~B35R19C21	15860	42290	110	5907	5968	953	15	48	48	111	234	210	100	100	0	274	273	12	4	136	136	139	22	15	100	100	0	42.457	43.212	41.755	42.861	1.192	43.381	0.795	80	576	100	5997	6057	5.408	5859	138	5920	137	477405
20	14	16	Hs~Ref:NM_006254.3~uORF:IOH26352~RFU:32669.27	HA20457~B20R16C14	18850	23680	110	5721	5711	869	15	50	50	427	757	177	100	100	0	434	443	33	7	79	79	121	70	57	100	100	0	15.975	15.552	15.744	15.448	1.205	17.417	0.792	80	568	100	6026	6025	3.998	5671	355	5661	364	456880
26	11	4	Hs~MGC:BC017114.1~uORF:IOH9995~RFU:36700.15	HA20457~B26R04C11	9310	30370	110	5692	5730	1108	19	49	49	178	375	210	100	100	0	4759	4632	452	9	118	118	166	151	90	100	100	0	1.216	1.259	1.225	1.242	1.204	1.301	0.873	80	568	100	10284	10195	0.282	5643	4641	5681	4514	458405
18	17	15	Hs~Ref:NM_005607.1~CAT:PV3832~RFU:6932.66	HA20457~B18R15C17	10450	23530	110	5647	5778	1128	19	48	48	48	4	8	100	100	0	282	378	378	100	98	98	99	9	9	100	100	0	30.429	20.464	30.849	26.733	1.763	20.606	0.321	80	566	100	5783	6010	4.927	5599	184	5730	280	462207
34	3	16	Hs~Ref:NM_033439~CAT_PHC9255~RFU:30.57	HA20457~B34R16C03	7720	41750	110	5619	4857	2417	49	47	47	52	64	123	92	92	0	279	284	86	30	120	120	120	9	7	96	95	0	35.044	29.329	29.246	19.758	3.521	33.729	0.778	80	535	100	5731	4974	5.131	5572	159	4810	164	388589
34	4	16	Hs~Ref:NM_033439~CAT_PHC9255~RFU:32.75	HA20457~B34R16C04	7900	41760	110	5544	4411	3250	73	50	50	914	2413	264	65	53	0	317	1777	4245	238	131	131	139	28	20	86	77	0	29.538	2.649	14.547	6.903	6.722	1.975	0.152	80	556	100	5680	6007	4.884	5494	186	4361	1646	352919
41	20	5	Hs~MGC:BC050432.1~uORF:IOH26694~RFU:3679.32	HA20457~B41R05C20	6730	48580	110	5526	5326	1844	34	47	47	47	7	14	100	100	0	446	442	86	19	135	135	139	15	10	100	100	0	17.617	17.195	17.456	16.568	1.577	19.301	0.829	80	567	100	5790	5586	4.139	5479	311	5279	307	426069
41	19	5	Hs~MGC:BC050432.1~uORF:IOH26694~RFU:4597.16	HA20457~B41R05C19	6530	48580	110	5306	5436	2466	45	46	46	47	7	14	100	100	0	464	454	83	18	153	153	161	30	18	100	97	0	16.913	17.907	18.041	16.683	1.664	22.378	0.731	80	567	100	5571	5691	4.080	5260	311	5390	301	434886
44	15	14	Hs~Ref:NM_002924.2~uORF:IOH11294~RFU:2274.93	HA20457~B44R14C15	19230	50290	110	5223	5017	1372	27	50	50	135	220	162	100	100	0	846	817	183	22	131	131	133	31	23	98	98	0	7.235	7.241	6.559	7.566	1.870	8.400	0.765	80	583	100	5888	5653	2.855	5173	715	4967	686	401341
46	8	4	Hs~MGC:BC014991.1~uORF:IOH12177~RFU:46140.25	HA20457~B46R04C08	8850	52870	110	5219	5537	1253	22	49	49	131	176	134	100	100	0	3798	3686	381	10	206	206	237	65	27	100	100	0	1.439	1.577	1.512	1.549	1.227	1.633	0.869	80	555	100	8762	8968	0.525	5170	3592	5488	3480	442964
39	22	3	Hs~Ref:NM_014481.2~uORF:IOH4887~RFU:60242.36	HA20457~B39R03C22	16070	43630	110	5216	5314	861	16	48	48	199	364	182	100	100	0	1454	1419	119	8	146	146	224	162	72	100	100	0	3.951	4.137	4.146	4.100	1.226	4.488	0.841	80	596	100	6476	6539	1.982	5168	1308	5266	1273	425158
26	12	4	Hs~MGC:BC017114.1~uORF:IOH9995~RFU:35552.46	HA20457~B26R04C12	9510	30380	110	5103	5399	1071	19	49	49	178	394	221	100	100	0	4896	4846	413	8	105	105	154	170	110	100	100	0	1.055	1.128	1.130	1.112	1.247	1.224	0.848	80	563	100	9845	10091	0.077	5054	4791	5350	4741	431914
34	6	17	Hs~MGC:BC015047.1~uORF:IOH10054~RFU:4223.8	HA20457~B34R17C06	8270	41920	110	5096	5486	2281	41	811	811	1706	3851	225	57	18	0	206	212	46	21	156	156	213	309	145	0	0	0	85.700	83.482	80.040	85.099	2.996	156.320	0.022	80	481	100	4335	4731	6.421	4285	50	4675	56	438892
30	21	1	AlexaAntiMouseAb~N/A	HA20457~B30R01C21	11300	34250	110	5026	4940	1867	37	48	48	51	40	78	100	100	0	15683	14674	3232	22	114	114	154	105	68	100	100	0	0.320	0.336	0.331	0.313	1.632	0.323	0.823	80	606	100	20547	19452	-1.645	4978	15569	4892	14560	395219
30	22	1	AlexaAntiMouseAb~N/A	HA20457~B30R01C22	11500	34260	110	4920	4518	1712	37	47	47	49	29	59	100	100	0	15449	14734	2517	17	110	110	142	98	69	100	100	0	0.318	0.306	0.332	0.257	2.134	0.315	0.881	80	612	100	20212	19095	-1.654	4873	15339	4471	14624	361443
41	15	14	Hs~Ref:NM_130398.1~uORF:IOH5832~RFU:21860.12	HA20457~B41R14C15	5750	50370	110	4843	4358	1932	44	49	49	204	762	373	93	83	0	921	885	175	19	174	174	203	77	37	100	98	0	6.418	6.060	6.871	5.385	2.439	8.888	0.429	80	573	100	5541	5020	2.682	4794	747	4309	711	348655
46	7	4	Hs~MGC:BC014991.1~uORF:IOH12177~RFU:44852.12	HA20457~B46R04C07	8650	52870	110	4810	4751	927	19	47	47	152	259	170	100	100	0	3583	3595	430	11	212	212	243	64	26	100	100	0	1.413	1.390	1.410	1.376	1.247	1.495	0.835	80	554	100	8134	8087	0.499	4763	3371	4704	3383	380110
38	21	1	AlexaAntiMouseAb~N/A	HA20457~B38R01C21	11340	43230	110	4446	3724	1874	50	47	47	53	60	113	95	95	0	15484	13583	4689	34	155	155	366	309	84	100	100	0	0.287	0.274	0.283	0.207	3.193	0.287	0.755	80	590	100	19728	17105	-1.801	4399	15329	3677	13428	297934
34	5	17	Hs~MGC:BC015047.1~uORF:IOH10054~RFU:3827.19	HA20457~B34R17C05	8120	41950	110	4403	4966	1889	38	2213	2213	4020	5324	132	11	0	0	283	285	37	12	181	181	209	289	138	0	0	0	21.471	26.471	21.427	22.394	2.537	-1569.762	0.000	80	503	100	2292	2857	4.424	2190	102	2753	104	397289
27	1	1	AlexaAntiMouseAb~N/A	HA20457~B27R01C01	11820	29730	110	4398	3775	1337	35	48	48	58	53	91	98	97	0	10822	10373	1935	18	116	116	158	105	66	100	100	0	0.406	0.363	0.373	0.319	2.036	0.366	0.886	80	620	100	15056	13984	-1.299	4350	10706	3727	10257	301996
45	14	14	Hs~MGC:BC009195.2~uORF:IOH12344~RFU:15051.15	HA20457~B45R14C14	5490	54830	110	4392	4189	1786	42	46	46	84	279	332	100	100	0	418	411	78	18	175	175	185	36	19	93	93	0	17.885	17.555	15.890	17.888	2.013	19.974	0.695	80	559	100	4589	4379	4.161	4346	243	4143	236	335099
41	16	14	Hs~Ref:NM_130398.1~uORF:IOH5832~RFU:22562.31	HA20457~B41R14C16	5940	50370	110	4314	4572	2274	49	50	50	172	292	169	100	100	0	908	911	80	8	178	178	198	65	32	100	100	0	5.841	6.169	6.202	5.327	1.893	9.247	0.515	80	564	100	4994	5255	2.546	4264	730	4522	733	365755
46	21	1	AlexaAntiMouseAb~N/A	HA20457~B46R01C21	11450	52240	110	4273	3943	1769	44	47	47	52	25	48	97	97	0	15474	14344	3197	22	231	231	464	331	71	100	100	0	0.277	0.276	0.281	0.207	2.862	0.293	0.871	80	606	100	19469	18009	-1.851	4226	15243	3896	14113	315409
40	1	1	AlexaAntiMouseAb~N/A	HA20457~B40R01C01	16400	43230	110	4244	3675	1761	47	47	47	47	8	17	97	97	0	12169	11046	2744	24	131	131	140	34	24	100	100	0	0.349	0.332	0.352	0.227	3.498	0.336	0.829	80	594	100	16235	14543	-1.520	4197	12038	3628	10915	293990
11	18	13	Hs~Ref:NM_002945.2~uORF:IOH11757~RFU:55705.24	HA20457~B11R13C18	15090	14080	110	4218	4309	897	20	49	49	109	221	202	100	100	0	3088	3057	251	8	94	94	114	84	73	100	100	0	1.392	1.438	1.356	1.411	1.252	1.599	0.844	80	592	100	7163	7223	0.478	4169	2994	4260	2963	344726
8	22	9	Hs~Ref:NM_004596.1~uORF:IOH6628~RFU:37161.46	HA20457~B08R09C22	20380	8770	110	4116	4125	874	21	48	48	101	143	141	100	100	0	1515	1491	452	30	231	231	248	94	37	100	100	0	3.168	3.236	3.366	3.264	1.312	3.419	0.783	80	580	100	5352	5337	1.664	4068	1284	4077	1260	330035
21	21	1	AlexaAntiMouseAb~N/A	HA20457~B21R01C21	6770	25240	110	4092	3536	1357	38	48	48	53	49	92	96	96	0	10671	10389	1353	13	277	277	275	115	41	100	100	0	0.389	0.345	0.372	0.263	3.115	0.359	0.865	80	607	100	14438	13600	-1.362	4044	10394	3488	10112	282846
38	22	1	AlexaAntiMouseAb~N/A	HA20457~B38R01C22	11540	43220	110	4075	3567	2129	59	47	47	62	93	150	91	90	0	14130	11909	5126	43	138	138	280	281	100	100	100	0	0.288	0.299	0.322	0.208	3.080	0.307	0.828	80	620	100	18020	15291	-1.796	4028	13992	3520	11771	285380
31	22	1	AlexaAntiMouseAb~N/A	HA20457~B31R01C22	15990	34180	110	4040	3240	2099	64	47	47	80	231	288	82	81	0	11771	9701	4152	42	115	115	176	190	107	100	96	0	0.343	0.333	0.341	0.165	4.484	0.355	0.854	80	635	100	15649	12779	-1.546	3993	11656	3193	9586	259205
26	21	1	AlexaAntiMouseAb~N/A	HA20457~B26R01C21	11320	29750	110	4035	3903	1642	42	48	48	48	3	6	100	100	0	11287	10424	2392	22	110	110	149	103	69	100	100	0	0.357	0.374	0.401	0.312	2.224	0.380	0.866	80	605	100	15164	14169	-1.487	3987	11177	3855	10314	312219
11	17	13	Hs~Ref:NM_002945.2~uORF:IOH11757~RFU:48965.07	HA20457~B11R13C17	14890	14080	110	4034	4266	869	20	50	50	111	213	191	100	100	0	3346	3451	752	21	111	111	125	74	59	100	100	0	1.232	1.262	1.260	1.262	1.278	1.344	0.825	80	560	100	7219	7556	0.300	3984	3235	4216	3340	341319
46	2	1	AlexaAntiMouseAb~N/A	HA20457~B46R01C02	7650	52260	110	4006	3976	1154	29	49	49	105	165	157	100	100	0	13342	12923	1452	11	295	295	443	275	62	100	100	0	0.303	0.311	0.314	0.297	1.327	0.313	0.894	80	581	100	17004	16555	-1.721	3957	13047	3927	12628	318075
32	2	1	AlexaAntiMouseAb~N/A	HA20457~B32R01C02	16550	34220	110	3975	3628	1272	35	48	48	53	31	58	100	100	0	11699	10249	3525	34	132	132	225	177	78	100	100	0	0.340	0.354	0.363	0.368	1.372	0.340	0.925	80	594	100	15494	13697	-1.559	3927	11567	3580	10117	290216
30	1	1	AlexaAntiMouseAb~N/A	HA20457~B30R01C01	7290	34250	110	3973	3739	988	26	48	48	87	127	145	100	100	0	12818	12702	817	6	373	373	356	215	60	100	100	0	0.315	0.299	0.317	0.285	1.394	0.293	0.855	80	612	100	16370	16020	-1.665	3925	12445	3691	12329	299104
48	21	1	AlexaAntiMouseAb~N/A	HA20457~B48R01C21	20460	52210	110	3964	3447	1347	39	46	46	50	23	46	100	100	0	12396	11732	2204	18	223	223	270	149	55	100	100	0	0.322	0.296	0.322	0.258	1.850	0.304	0.821	80	576	100	16091	14910	-1.635	3918	12173	3401	11509	275736
46	22	1	AlexaAntiMouseAb~N/A	HA20457~B46R01C22	11650	52250	110	3941	3494	1324	37	46	46	48	21	43	100	98	0	14722	13640	2847	20	189	189	272	234	86	100	100	0	0.268	0.256	0.272	0.220	1.949	0.260	0.889	80	602	100	18428	16899	-1.900	3895	14533	3448	13451	279559
39	1	1	AlexaAntiMouseAb~N/A	HA20457~B39R01C01	11860	43240	110	3934	3513	1553	44	48	48	63	112	177	98	98	0	12916	12069	2676	22	196	196	370	264	71	100	100	0	0.306	0.292	0.318	0.253	1.663	0.297	0.833	80	592	100	16606	15338	-1.711	3886	12720	3465	11873	281054
42	22	1	AlexaAntiMouseAb~N/A	HA20457~B42R01C22	11610	47710	110	3929	3647	1136	31	47	47	59	99	167	100	98	0	12192	11314	2067	18	220	220	347	209	60	100	100	0	0.324	0.324	0.333	0.303	1.584	0.326	0.881	80	629	100	15854	14694	-1.625	3882	11972	3600	11094	291767
39	21	1	AlexaAntiMouseAb~N/A	HA20457~B39R01C21	15870	43230	110	3921	3635	1239	34	47	47	49	35	71	100	100	0	12301	11750	1887	16	367	367	385	194	50	100	100	0	0.325	0.315	0.328	0.291	1.466	0.323	0.889	80	558	100	15808	14971	-1.623	3874	11934	3588	11383	290801
31	2	1	AlexaAntiMouseAb~N/A	HA20457~B31R01C02	11990	34240	110	3906	3717	1153	31	47	47	49	12	24	100	100	0	11920	11653	1698	14	123	123	325	1019	313	100	100	0	0.327	0.318	0.315	0.301	1.355	0.322	0.905	80	580	100	15656	15200	-1.612	3859	11797	3670	11530	297330
43	9	6	Hs~Ref:NM_000975.2~uORF:IOH1740~RFU:5950.87	HA20457~B43R06C09	13490	48700	110	3867	3858	856	22	49	49	66	66	100	100	100	0	990	964	159	16	169	169	180	51	28	100	100	0	4.650	4.791	4.623	4.748	1.345	5.029	0.856	80	544	100	4639	4604	2.217	3818	821	3809	795	308602
31	1	1	AlexaAntiMouseAb~N/A	HA20457~B31R01C01	11800	34240	110	3865	3671	1072	29	47	47	47	4	8	100	100	0	12694	12133	2064	17	118	118	150	94	62	100	100	0	0.304	0.302	0.314	0.292	1.552	0.290	0.836	80	592	100	16394	15639	-1.720	3818	12576	3624	12015	293670
23	2	1	AlexaAntiMouseAb~N/A	HA20457~B23R01C02	11940	25220	110	3855	3640	1092	30	52	52	101	112	110	100	100	0	11513	10668	2459	23	185	185	274	186	67	100	100	0	0.336	0.342	0.354	0.346	1.633	0.321	0.822	80	580	100	15131	14071	-1.575	3803	11328	3588	10483	291202
31	2	11	AlexaAntiMouseAb~N/A	HA20457~B31R11C02	12000	36240	110	3839	3813	1109	29	47	47	47	10	21	100	100	0	11322	10908	1814	16	110	110	123	50	40	100	100	0	0.338	0.349	0.349	0.339	1.473	0.336	0.844	80	519	100	15004	14564	-1.564	3792	11212	3766	10798	305066
46	1	1	AlexaAntiMouseAb~N/A	HA20457~B46R01C01	7450	52260	110	3773	3690	1022	27	49	49	161	270	167	100	100	0	12786	12189	1763	14	280	280	474	314	66	100	100	0	0.298	0.306	0.301	0.296	1.406	0.304	0.879	80	614	100	16230	15550	-1.748	3724	12506	3641	11909	295181
11	21	1	AlexaAntiMouseAb~N/A	HA20457~B11R01C21	15680	11670	110	3767	3760	1079	28	47	47	48	12	25	100	100	0	11330	10687	1958	18	160	160	217	128	58	100	100	0	0.333	0.353	0.353	0.341	1.555	0.346	0.863	80	606	100	14890	14240	-1.586	3720	11170	3713	10527	300823
43	1	1	AlexaAntiMouseAb~N/A	HA20457~B43R01C01	11890	47700	110	3761	3617	1178	32	49	49	87	95	109	100	100	0	12185	11371	1973	17	424	424	434	186	42	100	100	0	0.316	0.326	0.333	0.304	1.525	0.321	0.850	80	612	100	15473	14515	-1.664	3712	11761	3568	10947	289381
40	2	1	AlexaAntiMouseAb~N/A	HA20457~B40R01C02	16590	43210	110	3745	3683	1145	31	47	47	48	15	31	100	100	0	11819	10437	3174	30	128	128	136	40	29	100	100	0	0.316	0.353	0.344	0.365	1.645	0.339	0.894	80	613	100	15389	13945	-1.661	3698	11691	3636	10309	294670
45	13	14	Hs~MGC:BC009195.2~uORF:IOH12344~RFU:14582.4	HA20457~B45R14C13	5280	54820	110	3738	3764	2827	75	47	47	150	425	283	82	75	0	433	417	111	26	171	171	220	159	72	86	13	0	14.088	15.110	15.683	8.056	4.735	24.678	0.291	80	573	100	3953	3963	3.816	3691	262	3717	246	301084
47	3	7	Hs~MGC:BC036076.1~uORF:IOH27281~RFU:2929.69	HA20457~B47R07C03	12360	53420	110	3702	3730	1479	39	47	47	2090	9119	436	0	0	0	388	384	31	8	174	174	184	48	26	100	100	0	17.079	17.538	17.696	16.229	1.496	28.518	0.522	80	566	100	3869	3893	4.094	3655	214	3683	210	298394
23	21	1	AlexaAntiMouseAb~N/A	HA20457~B23R01C21	15750	25210	110	3697	3619	839	23	48	48	49	10	20	100	100	0	11397	10991	1681	15	127	127	244	187	76	100	100	0	0.324	0.329	0.331	0.322	1.462	0.321	0.876	80	565	100	14919	14435	-1.627	3649	11270	3571	10864	289514
31	21	1	AlexaAntiMouseAb~N/A	HA20457~B31R01C21	15790	34200	110	3692	3102	1590	51	47	47	54	87	161	91	87	0	11938	10221	3606	35	136	136	218	160	73	100	100	0	0.309	0.303	0.310	0.189	3.609	0.317	0.899	80	600	100	15447	13140	-1.695	3645	11802	3055	10085	248129
17	18	15	Hs~Ref:NM_004938.1~CAT:PV3969~RFU:20907.74	HA20457~B17R15C18	6120	23570	110	3677	3703	1292	34	47	47	83	261	314	100	100	0	359	424	354	83	104	104	105	11	10	100	100	0	14.235	11.425	15.382	12.501	1.868	14.885	0.278	80	566	100	3885	3976	3.831	3630	255	3656	320	296245
43	22	1	AlexaAntiMouseAb~N/A	HA20457~B43R01C22	16090	47680	110	3654	3489	1329	38	47	47	54	40	74	100	100	0	11867	11110	2016	18	151	151	252	190	75	100	100	0	0.308	0.314	0.326	0.288	1.527	0.324	0.883	80	620	100	15323	14401	-1.700	3607	11716	3442	10959	279100
17	17	15	Hs~Ref:NM_004938.1~CAT:PV3969~RFU:20721.73	HA20457~B17R15C17	5930	23580	110	3649	3700	1224	33	49	49	52	28	53	100	100	0	345	336	68	20	107	107	111	20	18	98	98	0	15.126	15.943	15.352	16.350	1.597	17.258	0.827	80	566	100	3838	3880	3.919	3600	238	3651	229	296030
37	21	1	AlexaAntiMouseAb~N/A	HA20457~B37R01C21	6840	43270	110	3625	3277	1386	42	48	48	49	13	26	100	100	0	12230	11112	3157	28	179	179	346	254	73	100	100	0	0.297	0.295	0.296	0.261	1.971	0.297	0.831	80	559	100	15628	14162	-1.752	3577	12051	3229	10933	262145
45	22	1	AlexaAntiMouseAb~N/A	HA20457~B45R01C22	7070	52240	110	3618	3442	1397	40	50	50	132	228	172	98	97	0	12522	11539	2382	20	327	327	451	260	57	100	100	0	0.293	0.303	0.304	0.272	1.805	0.302	0.844	80	602	100	15763	14604	-1.773	3568	12195	3392	11212	275398
47	2	11	AlexaAntiMouseAb~N/A	HA20457~B47R11C02	12160	54210	110	3615	3291	1425	43	50	50	702	1479	210	83	71	0	11353	10276	3385	32	238	238	325	185	56	100	100	0	0.321	0.323	0.328	0.268	2.758	0.303	0.539	80	574	100	14680	13279	-1.641	3565	11115	3241	10038	263302
48	2	1	AlexaAntiMouseAb~N/A	HA20457~B48R01C02	16680	52220	110	3609	3300	1108	33	49	49	107	127	118	98	98	0	11707	11086	2351	21	263	263	314	163	51	100	100	0	0.311	0.300	0.311	0.277	1.750	0.284	0.823	80	588	100	15004	14074	-1.685	3560	11444	3251	10823	264009
41	2	16	Hs~Ref:NM_004443.2~CAT:PV3658~RFU:12811.57	HA20457~B41R16C02	3140	50790	110	3604	3283	1464	44	46	46	46	2	4	100	100	0	359	340	60	17	189	189	189	12	6	97	96	0	20.929	21.437	21.259	19.843	1.854	24.904	0.781	80	558	100	3728	3388	4.387	3558	170	3237	151	262644
37	22	1	AlexaAntiMouseAb~N/A	HA20457~B37R01C22	7030	43270	110	3589	3010	1685	55	48	48	58	73	125	96	96	0	12986	10901	4434	40	147	147	275	244	88	100	100	0	0.276	0.275	0.283	0.225	1.964	0.290	0.883	80	594	100	16380	13716	-1.858	3541	12839	2962	10754	240802
12	9	19	Hs~Ref:NM_006775.1~uORF:IOH10720~RFU:11911.57	HA20457~B12R19C09	17840	15300	110	3585	3782	1062	28	49	49	93	114	122	98	98	0	719	657	178	27	97	97	104	29	27	96	93	0	5.685	6.666	6.158	7.435	2.189	7.393	0.762	80	576	100	4158	4293	2.507	3536	622	3733	560	302556
23	1	1	AlexaAntiMouseAb~N/A	HA20457~B23R01C01	11750	25230	110	3556	3640	871	23	50	50	86	106	123	100	100	0	11271	10607	1930	18	281	281	316	212	67	100	100	0	0.319	0.348	0.357	0.350	1.343	0.330	0.877	80	592	100	14496	13916	-1.648	3506	10990	3590	10326	291223
47	1	1	AlexaAntiMouseAb~N/A	HA20457~B47R01C01	11960	52230	110	3555	3638	1155	31	46	46	47	7	14	100	100	0	12305	11601	2123	18	219	219	247	85	34	100	100	0	0.290	0.316	0.304	0.307	1.378	0.314	0.883	80	634	100	15595	14974	-1.784	3509	12086	3592	11382	291073
48	1	1	AlexaAntiMouseAb~N/A	HA20457~B48R01C01	16480	52230	110	3553	3441	1472	42	48	48	71	94	132	100	100	0	11461	11367	1715	15	427	427	424	225	53	100	100	0	0.318	0.310	0.315	0.266	1.841	0.315	0.816	80	602	100	14539	14333	-1.654	3505	11034	3393	10940	275306
8	21	9	Hs~Ref:NM_004596.1~uORF:IOH6628~RFU:36893.6	HA20457~B08R09C21	20180	8770	110	3545	3712	879	23	51	51	120	153	127	100	100	0	1314	1306	143	10	218	218	246	93	37	100	100	0	3.188	3.365	3.308	3.304	1.285	3.614	0.849	80	566	100	4590	4749	1.673	3494	1096	3661	1088	296984
47	14	8	Hs~MGC:BC035568.1~uORF:IOH27552~RFU:21174.67	HA20457~B47R08C14	14570	53600	110	3542	3542	892	25	51	51	96	101	105	100	100	0	548	552	57	10	170	170	195	60	30	100	100	0	9.235	9.139	9.406	8.947	1.299	9.673	0.769	80	575	100	3869	3873	3.207	3491	378	3491	382	283338
21	22	1	AlexaAntiMouseAb~N/A	HA20457~B21R01C22	6970	25240	110	3540	3456	1138	32	49	49	51	22	43	100	100	0	10548	10191	1600	15	175	175	234	139	59	100	100	0	0.337	0.340	0.342	0.306	1.783	0.352	0.867	80	612	100	13864	13423	-1.571	3491	10373	3407	10016	276446
24	2	1	AlexaAntiMouseAb~N/A	HA20457~B24R01C02	16460	25200	110	3532	3294	1275	38	52	52	106	153	144	100	100	0	10576	9876	1750	17	178	178	245	181	73	100	100	0	0.335	0.334	0.349	0.305	1.528	0.331	0.826	80	581	100	13878	12940	-1.579	3480	10398	3242	9698	263542
7	1	1	AlexaAntiMouseAb~N/A	HA20457~B07R01C01	11700	7230	110	3528	3457	882	25	47	47	47	3	6	100	100	0	11802	11545	1060	9	122	122	143	55	38	100	100	0	0.298	0.299	0.306	0.288	1.299	0.291	0.900	80	612	100	15161	14833	-1.746	3481	11680	3410	11423	276561
7	1	18	Hs~MGC:BC002755.1~N/A~RFU:40319.94	HA20457~B07R18C01	11710	10630	110	3522	3498	924	26	99	99	582	792	136	100	100	0	699	724	107	14	256	256	278	169	60	100	91	0	7.727	7.263	7.246	7.194	1.243	6.991	0.615	80	602	100	3866	3867	2.950	3423	443	3399	468	279874
14	7	3	Hs~Ref:NM_005975.2~uORF:IOH37738~RFU:19501.09	HA20457~B14R03C07	8380	16640	110	3504	3515	1037	29	47	47	47	5	10	100	100	0	332	325	42	12	97	97	98	10	10	100	100	0	14.711	15.211	15.602	14.873	1.399	16.984	0.741	80	586	100	3692	3696	3.879	3457	235	3468	228	281169
34	22	1	AlexaAntiMouseAb~N/A	HA20457~B34R01C22	11530	38720	110	3504	3334	1246	37	49	49	61	54	88	100	100	0	12047	10957	2920	26	183	183	279	176	63	100	100	0	0.291	0.305	0.294	0.291	1.580	0.297	0.854	80	620	100	15319	14059	-1.780	3455	11864	3285	10774	266682
43	10	6	Hs~Ref:NM_000975.2~uORF:IOH1740~RFU:5838.91	HA20457~B43R06C10	13680	48700	110	3502	3329	1077	32	52	52	196	326	166	100	97	0	960	932	253	27	239	239	251	95	37	98	97	0	4.785	4.729	4.420	4.733	1.572	4.840	0.789	80	585	100	4171	3970	2.259	3450	721	3277	693	266338
10	21	1	AlexaAntiMouseAb~N/A	HA20457~B10R01C21	11170	11720	110	3496	3234	872	26	48	48	64	80	125	100	100	0	11738	11476	1119	9	158	158	207	114	55	100	100	0	0.298	0.281	0.301	0.264	1.581	0.279	0.900	80	599	100	15028	14504	-1.748	3448	11580	3186	11318	258740
15	22	1	AlexaAntiMouseAb~N/A	HA20457~B15R01C22	15960	16180	110	3488	3237	1299	40	48	48	51	21	41	100	98	0	11167	10156	2482	24	101	101	166	148	89	100	100	0	0.311	0.317	0.337	0.283	1.912	0.325	0.822	80	613	100	14506	13244	-1.686	3440	11066	3189	10055	258921
2	14	7	Hs~MGC:BC017941.1~uORF:IOH13654~RFU:29031.66	HA20457~B02R07C14	9760	3970	110	3486	3342	630	18	50	50	88	117	132	100	100	0	328	324	39	12	114	114	124	36	29	100	100	0	16.056	15.676	15.500	15.634	1.230	17.813	0.705	80	548	100	3650	3502	4.005	3436	214	3292	210	267369
12	2	1	AlexaAntiMouseAb~N/A	HA20457~B12R01C02	16410	11700	110	3484	3308	1192	36	48	48	77	98	127	98	98	0	10500	9679	2765	28	143	143	205	118	57	100	100	0	0.332	0.342	0.343	0.338	1.986	0.325	0.831	80	588	100	13793	12796	-1.592	3436	10357	3260	9536	264618
14	8	3	Hs~Ref:NM_005975.2~uORF:IOH37738~RFU:20987.99	HA20457~B14R03C08	8580	16640	110	3449	3335	919	27	48	48	52	22	42	100	100	0	307	304	41	13	99	99	116	34	29	100	96	0	16.351	16.034	15.717	15.829	1.443	18.781	0.713	80	577	100	3609	3492	4.031	3401	208	3287	205	266791
15	1	11	AlexaAntiMouseAb~N/A	HA20457~B15R11C01	11770	18190	110	3449	3123	1003	32	48	48	53	26	49	100	100	0	10378	9724	1924	19	150	150	232	144	62	100	100	0	0.333	0.321	0.324	0.305	1.638	0.316	0.865	80	588	100	13629	12649	-1.588	3401	10228	3075	9574	249816
38	2	1	AlexaAntiMouseAb~N/A	HA20457~B38R01C02	7530	43240	110	3447	3137	1509	48	48	48	60	64	106	95	95	0	13155	12120	3274	27	181	181	297	228	76	100	100	0	0.262	0.259	0.272	0.181	3.398	0.275	0.854	80	586	100	16373	15028	-1.932	3399	12974	3089	11939	250954
7	22	1	AlexaAntiMouseAb~N/A	HA20457~B07R01C22	15900	7210	110	3437	3210	1104	34	47	47	48	13	27	100	100	0	12150	11274	2185	19	108	108	139	76	54	100	100	0	0.282	0.283	0.298	0.265	1.679	0.278	0.863	80	604	100	15432	14329	-1.829	3390	12042	3163	11166	256775
11	1	1	AlexaAntiMouseAb~N/A	HA20457~B11R01C01	11690	11690	110	3428	3249	901	27	49	49	88	116	131	100	100	0	11758	11596	1076	9	171	171	258	165	63	100	100	0	0.292	0.280	0.292	0.266	1.451	0.269	0.839	80	613	100	14966	14625	-1.778	3379	11587	3200	11425	259900
43	21	1	AlexaAntiMouseAb~N/A	HA20457~B43R01C21	15890	47680	110	3419	3403	1479	43	48	48	59	43	72	100	100	0	11759	10804	2491	23	215	215	318	197	61	100	100	0	0.292	0.317	0.309	0.296	1.509	0.327	0.851	80	606	100	14915	13944	-1.776	3371	11544	3355	10589	272262
39	1	11	AlexaAntiMouseAb~N/A	HA20457~B39R11C01	11870	45250	110	3415	3073	1114	36	47	47	50	18	36	100	100	0	11341	11419	968	8	402	402	367	197	53	100	100	0	0.308	0.275	0.289	0.246	1.686	0.276	0.831	80	588	100	14307	14043	-1.700	3368	10939	3026	11017	245841
31	1	11	AlexaAntiMouseAb~N/A	HA20457~B31R11C01	11800	36240	110	3411	3285	1066	32	47	47	48	13	27	100	100	0	11065	10672	2005	18	112	112	124	47	37	100	100	0	0.307	0.307	0.316	0.287	1.620	0.307	0.885	80	580	100	14317	13798	-1.703	3364	10953	3238	10560	262773
34	21	1	AlexaAntiMouseAb~N/A	HA20457~B34R01C21	11330	38720	110	3410	3252	1427	43	48	48	48	3	6	100	100	0	11997	10847	2996	27	173	173	291	188	64	100	100	0	0.284	0.300	0.296	0.274	1.583	0.311	0.894	80	607	100	15186	13878	-1.814	3362	11824	3204	10674	260142
20	18	9	Hs~Ref:NM_013375.2~uORF:IOH1920~RFU:21958.52	HA20457~B20R09C18	19660	22280	110	3405	3445	656	19	49	49	76	102	134	100	100	0	2070	2065	138	6	97	97	122	92	75	100	100	0	1.701	1.726	1.749	1.695	1.233	1.747	0.846	80	575	100	5329	5364	0.766	3356	1973	3396	1968	275589
35	22	1	AlexaAntiMouseAb~N/A	HA20457~B35R01C22	16050	38690	110	3405	3399	1293	38	46	46	47	15	31	100	100	0	11040	10327	1858	17	128	128	141	50	35	100	100	0	0.308	0.329	0.346	0.302	1.602	0.334	0.836	80	629	100	14271	13552	-1.700	3359	10912	3353	10199	271943
25	1	1	AlexaAntiMouseAb~N/A	HA20457~B25R01C01	2770	29750	110	3404	3145	1341	42	48	48	51	20	39	100	100	0	10366	10051	1562	15	129	129	139	48	34	100	100	0	0.328	0.312	0.315	0.269	1.776	0.325	0.843	80	613	100	13593	13019	-1.609	3356	10237	3097	9922	251595
15	21	1	AlexaAntiMouseAb~N/A	HA20457~B15R01C21	15760	16180	110	3383	3412	1070	31	47	47	51	26	50	100	98	0	11032	10163	2490	24	117	117	188	149	79	100	100	0	0.306	0.335	0.321	0.325	1.965	0.324	0.799	80	607	100	14251	13411	-1.710	3336	10915	3365	10046	272981
10	22	1	AlexaAntiMouseAb~N/A	HA20457~B10R01C22	11370	11710	110	3372	3177	1009	31	48	48	51	17	33	100	100	0	11148	10546	2186	20	123	123	200	138	69	100	100	0	0.301	0.300	0.294	0.290	1.435	0.293	0.890	80	629	100	14349	13552	-1.730	3324	11025	3129	10423	254158
11	22	1	AlexaAntiMouseAb~N/A	HA20457~B11R01C22	15880	11680	110	3371	3166	1039	32	47	47	48	5	10	100	100	0	11269	10761	1355	12	174	174	230	147	63	100	100	0	0.300	0.295	0.306	0.274	1.458	0.302	0.872	80	612	100	14419	13706	-1.739	3324	11095	3119	10587	253243
36	2	11	AlexaAntiMouseAb~N/A	HA20457~B36R11C02	16620	40680	110	3370	3113	1124	36	46	46	47	3	6	100	100	0	9680	8660	2831	32	133	133	152	57	37	100	100	0	0.348	0.360	0.355	0.368	2.153	0.320	0.759	80	548	100	12871	11594	-1.522	3324	9547	3067	8527	249030
26	22	1	AlexaAntiMouseAb~N/A	HA20457~B26R01C22	11510	29760	110	3366	3304	1358	41	48	48	49	11	22	100	100	0	11420	10562	2053	19	103	103	134	91	67	100	100	0	0.293	0.311	0.309	0.279	1.595	0.322	0.870	80	602	100	14635	13715	-1.770	3318	11317	3256	10459	264303
22	22	1	AlexaAntiMouseAb~N/A	HA20457~B22R01C22	11420	25200	110	3356	2931	1443	49	49	49	51	15	29	97	97	0	11219	9481	3409	35	130	130	241	185	76	100	100	0	0.298	0.308	0.292	0.236	2.490	0.323	0.911	80	610	100	14396	12233	-1.746	3307	11089	2882	9351	234478
25	21	1	AlexaAntiMouseAb~N/A	HA20457~B25R01C21	6790	29740	110	3348	3141	1497	47	47	47	47	2	4	100	100	0	11056	9868	2692	27	126	126	131	32	24	100	100	0	0.302	0.318	0.325	0.289	2.068	0.304	0.752	80	598	100	14231	12836	-1.727	3301	10930	3094	9742	251261
44	1	1	AlexaAntiMouseAb~N/A	HA20457~B44R01C01	16420	47670	110	3346	3260	1019	31	50	50	135	202	149	100	98	0	10658	10368	1750	16	383	383	402	160	39	100	100	0	0.321	0.321	0.321	0.301	1.745	0.307	0.817	80	602	100	13571	13195	-1.640	3296	10275	3210	9985	260790
35	1	1	AlexaAntiMouseAb~N/A	HA20457~B35R01C01	11840	38700	110	3345	3121	1098	35	51	51	104	132	126	98	98	0	11278	10511	1874	17	298	298	347	169	48	100	100	0	0.300	0.301	0.300	0.264	1.889	0.298	0.867	80	612	100	14274	13283	-1.737	3294	10980	3070	10213	249677
28	2	1	AlexaAntiMouseAb~N/A	HA20457~B28R01C02	16500	29680	110	3345	2864	1645	57	50	50	100	120	120	91	91	0	10136	9010	2633	29	179	179	213	128	60	100	100	0	0.331	0.319	0.327	0.223	2.738	0.338	0.770	80	590	100	13252	11645	-1.595	3295	9957	2814	8831	229144
36	2	1	AlexaAntiMouseAb~N/A	HA20457~B36R01C02	16540	38680	110	3338	3265	1111	34	48	48	48	4	8	100	100	0	10859	9531	2749	28	132	132	140	35	25	100	100	0	0.307	0.342	0.334	0.342	1.575	0.325	0.834	80	600	100	14017	12616	-1.705	3290	10727	3217	9399	261213
20	2	1	AlexaAntiMouseAb~N/A	HA20457~B20R01C02	16450	20690	110	3335	3026	1461	48	49	49	69	80	115	100	97	0	10075	9740	1160	11	168	168	196	102	52	100	100	0	0.332	0.311	0.331	0.258	2.064	0.317	0.758	80	568	100	13193	12549	-1.592	3286	9907	2977	9572	242052
4	22	16	Hs~MGC:BC020810.1~uORF:IOH27927~RFU:25762.01	HA20457~B04R16C22	20400	5690	110	3332	3298	1599	48	53	53	160	255	159	100	100	0	1277	1306	189	14	310	310	338	119	35	100	100	0	3.391	3.258	3.090	2.927	1.599	4.403	0.653	80	580	100	4246	4241	1.762	3279	967	3245	996	263844
34	2	1	AlexaAntiMouseAb~N/A	HA20457~B34R01C02	7520	38750	110	3322	3076	1102	35	50	50	67	55	82	100	100	0	11992	11301	1826	16	184	184	270	157	58	100	100	0	0.277	0.272	0.280	0.249	1.506	0.277	0.871	80	570	100	15080	14143	-1.852	3272	11808	3026	11117	246101
20	1	1	AlexaAntiMouseAb~N/A	HA20457~B20R01C01	16250	20690	110	3316	2910	1092	37	50	50	82	73	89	100	100	0	10276	9718	1538	15	213	213	244	118	48	100	100	0	0.325	0.301	0.317	0.270	1.673	0.303	0.864	80	612	100	13329	12365	-1.623	3266	10063	2860	9505	232766
13	21	1	AlexaAntiMouseAb~N/A	HA20457~B13R01C21	6740	16260	110	3311	2980	1026	34	48	48	50	15	30	100	100	0	10886	10362	1653	15	159	159	196	100	51	100	100	0	0.304	0.287	0.316	0.259	1.667	0.284	0.795	80	577	100	13990	13135	-1.717	3263	10727	2932	10203	238400
30	1	11	AlexaAntiMouseAb~N/A	HA20457~B30R11C01	7300	36270	110	3305	3151	854	27	47	47	48	13	27	100	100	0	10378	9791	1797	18	216	216	231	117	50	100	100	0	0.321	0.324	0.331	0.313	1.401	0.309	0.880	80	614	100	13420	12679	-1.641	3258	10162	3104	9575	252073
28	1	11	AlexaAntiMouseAb~N/A	HA20457~B28R11C01	16320	31680	110	3302	3221	996	30	48	48	48	5	10	100	100	0	8629	8349	1856	22	122	122	189	111	58	100	100	0	0.383	0.386	0.373	0.376	1.428	0.377	0.878	80	580	100	11761	11400	-1.386	3254	8507	3173	8227	257710
13	18	9	Hs~MGC:BC008902.2~uORF:IOH46064~RFU:21406.25	HA20457~B13R09C18	6130	17870	110	3300	3226	1406	43	48	48	79	102	129	100	100	0	1998	1895	316	16	108	108	128	42	32	100	100	0	1.721	1.778	1.667	1.604	1.495	1.984	0.790	80	574	100	5142	4965	0.783	3252	1890	3178	1787	258070
15	2	11	AlexaAntiMouseAb~N/A	HA20457~B15R11C02	11970	18200	110	3295	3099	962	31	48	48	50	14	28	100	100	0	10273	9910	1371	13	114	114	179	114	63	100	100	0	0.320	0.311	0.327	0.292	1.517	0.315	0.872	80	568	100	13406	12847	-1.646	3247	10159	3051	9796	247890
44	2	1	AlexaAntiMouseAb~N/A	HA20457~B44R01C02	16610	47670	110	3295	3060	1524	49	49	49	94	126	134	98	97	0	10637	10517	1516	14	341	341	357	121	33	100	100	0	0.315	0.296	0.310	0.233	2.282	0.308	0.792	80	596	100	13542	13187	-1.665	3246	10296	3011	10176	244787
32	2	11	AlexaAntiMouseAb~N/A	HA20457~B32R11C02	16520	36210	110	3288	2990	1064	35	47	47	51	30	58	100	100	0	9430	9053	1405	15	118	118	132	48	36	100	100	0	0.348	0.329	0.341	0.290	1.790	0.334	0.849	80	566	100	12553	11878	-1.523	3241	9312	2943	8935	239234
22	1	1	AlexaAntiMouseAb~N/A	HA20457~B22R01C01	7220	25220	110	3288	2915	1048	35	49	49	79	102	129	100	100	0	10468	9796	2097	21	136	136	215	145	67	100	100	0	0.313	0.297	0.314	0.272	1.512	0.303	0.908	80	591	100	13571	12526	-1.673	3239	10332	2866	9660	233174
47	22	1	AlexaAntiMouseAb~N/A	HA20457~B47R01C22	16160	52210	110	3287	3084	1730	56	47	47	58	42	72	96	95	0	11754	11158	2454	21	180	180	289	197	68	100	100	0	0.280	0.277	0.274	0.184	3.845	0.291	0.750	80	620	100	14814	14015	-1.837	3240	11574	3037	10978	246698
21	2	11	AlexaAntiMouseAb~N/A	HA20457~B21R11C02	2980	27260	110	3284	3253	841	25	47	47	48	12	25	100	100	0	10091	9735	1181	12	113	113	125	43	34	100	100	0	0.324	0.333	0.335	0.323	1.384	0.315	0.819	80	557	100	13215	12828	-1.624	3237	9978	3206	9622	260262
27	19	8	Hs~MGC:BC033856.1~uORF:IOH21797~RFU:32661.83	HA20457~B27R08C19	15430	31130	110	3284	3084	605	19	52	52	148	179	120	100	100	0	1989	1941	256	13	154	154	158	56	35	100	100	0	1.761	1.697	1.689	1.675	1.258	1.735	0.885	80	567	100	5067	4819	0.817	3232	1835	3032	1787	246758
39	22	1	AlexaAntiMouseAb~N/A	HA20457~B39R01C22	16070	43220	110	3270	3159	998	31	47	47	47	7	14	100	100	0	12767	11759	2412	20	147	147	271	217	80	100	100	0	0.255	0.268	0.268	0.256	1.505	0.254	0.758	80	612	100	15843	14724	-1.969	3223	12620	3112	11612	252755
27	2	11	AlexaAntiMouseAb~N/A	HA20457~B27R11C02	12020	31740	110	3259	3069	1098	35	47	47	48	2	4	100	100	0	9250	8766	1842	21	108	108	124	48	38	100	100	0	0.351	0.349	0.355	0.315	1.629	0.350	0.888	80	544	100	12354	11680	-1.509	3212	9142	3022	8658	245484
8	2	1	AlexaAntiMouseAb~N/A	HA20457~B08R01C02	16360	7180	110	3256	3237	1131	34	48	48	55	32	58	100	100	0	10878	10639	1094	10	139	139	168	89	52	100	100	0	0.299	0.304	0.310	0.279	1.543	0.297	0.796	80	590	100	13947	13689	-1.743	3208	10739	3189	10500	258983
7	16	3	Hs~Ref:NM_020467.2~uORF:IOH3994~RFU:33977.07	HA20457~B07R03C16	14700	7630	110	3253	3435	734	21	52	52	413	563	136	100	100	0	2995	2998	92	3	108	108	374	385	102	100	100	0	1.109	1.171	1.114	1.145	1.228	1.344	0.796	80	553	100	6088	6273	0.149	3201	2887	3383	2890	274776
24	1	1	AlexaAntiMouseAb~N/A	HA20457~B24R01C01	16270	25190	110	3242	3040	1291	42	51	51	83	82	98	98	93	0	10594	10054	1579	15	225	225	326	232	71	100	100	0	0.308	0.304	0.318	0.245	2.285	0.313	0.834	80	611	100	13560	12818	-1.700	3191	10369	2989	9829	243181
4	8	16	Hs~Ref:NM_003418.1~uORF:IOH59002~RFU:12843.89	HA20457~B04R16C08	17600	5710	110	3237	3404	1274	37	48	48	52	40	76	100	100	0	487	461	101	21	106	106	110	16	14	100	98	0	8.370	9.454	9.407	9.480	1.676	10.850	0.783	80	584	100	3570	3711	3.065	3189	381	3356	355	272317
4	21	16	Hs~MGC:BC020810.1~uORF:IOH27927~RFU:28383.19	HA20457~B04R16C21	20200	5700	110	3236	3270	1139	34	52	52	173	364	210	100	100	0	1171	1202	150	12	249	249	273	127	46	100	100	0	3.453	3.377	3.308	3.224	1.373	4.663	0.647	80	546	100	4106	4171	1.788	3184	922	3218	953	261611
37	1	11	AlexaAntiMouseAb~N/A	HA20457~B37R11C01	2880	45300	110	3236	2690	1083	40	49	49	172	265	154	97	95	0	10837	9499	3274	34	430	430	500	343	68	100	97	0	0.306	0.291	0.311	0.286	1.386	0.278	0.891	80	580	100	13594	11710	-1.707	3187	10407	2641	9069	215227
39	2	1	AlexaAntiMouseAb~N/A	HA20457~B39R01C02	12050	43240	110	3230	2993	1679	56	49	49	89	198	222	90	88	0	12365	11108	3219	28	165	165	268	206	76	100	100	0	0.261	0.269	0.259	0.176	3.551	0.286	0.811	80	586	100	15381	13887	-1.939	3181	12200	2944	10943	239473
41	22	1	AlexaAntiMouseAb~N/A	HA20457~B41R01C22	7120	47780	110	3229	3015	1469	48	47	47	48	10	20	97	96	0	11749	10413	2961	28	146	146	247	199	80	100	100	0	0.274	0.289	0.292	0.205	3.662	0.300	0.862	80	580	100	14785	13235	-1.866	3182	11603	2968	10267	241203
34	1	1	AlexaAntiMouseAb~N/A	HA20457~B34R01C01	7330	38750	110	3223	3266	1063	32	50	50	92	108	117	100	100	0	12088	11321	1926	17	364	364	398	183	45	100	100	0	0.271	0.294	0.287	0.282	1.443	0.288	0.863	80	603	100	14897	14173	-1.886	3173	11724	3216	10957	261257
7	15	3	Hs~Ref:NM_020467.2~uORF:IOH3994~RFU:32313.32	HA20457~B07R03C15	14510	7630	110	3215	3467	955	27	188	188	413	466	112	100	100	0	3115	3102	202	6	278	278	502	445	88	100	100	0	1.067	1.161	1.076	1.127	1.307	1.322	0.774	80	563	100	5864	6103	0.094	3027	2837	3279	2824	277336
9	22	1	AlexaAntiMouseAb~N/A	HA20457~B09R01C22	6910	11720	110	3202	2897	1268	43	47	47	59	83	140	97	97	0	10419	9936	1813	18	178	178	228	145	63	100	100	0	0.308	0.292	0.314	0.230	2.815	0.290	0.767	80	621	100	13396	12608	-1.699	3155	10241	2850	9758	231791
47	2	1	AlexaAntiMouseAb~N/A	HA20457~B47R01C02	12160	52230	110	3194	3217	877	27	46	46	73	99	135	100	100	0	11993	11377	2174	19	249	249	297	150	50	100	100	0	0.268	0.285	0.278	0.278	1.481	0.274	0.856	80	598	100	14892	14299	-1.899	3148	11744	3171	11128	257366
4	12	17	Hs~Ref:NM_024068.1~uORF:IOH6654~RFU:17586.24	HA20457~B04R17C12	18390	5910	110	3193	3199	728	22	50	50	189	402	212	100	100	0	1948	1995	493	24	141	141	190	129	67	100	100	0	1.739	1.698	1.793	1.682	1.346	1.700	0.643	80	556	100	4950	5003	0.799	3143	1807	3149	1854	255892
7	21	1	AlexaAntiMouseAb~N/A	HA20457~B07R01C21	15710	7220	110	3184	2905	1039	35	47	47	47	2	4	100	100	0	11687	11181	1772	15	105	105	144	81	56	100	100	0	0.271	0.258	0.270	0.229	1.863	0.249	0.800	80	574	100	14719	13934	-1.884	3137	11582	2858	11076	232373
35	2	1	AlexaAntiMouseAb~N/A	HA20457~B35R01C02	12040	38710	110	3167	3076	768	24	50	50	83	80	96	100	100	0	10939	10371	1847	17	188	188	250	146	58	100	100	0	0.290	0.297	0.294	0.289	1.387	0.290	0.899	80	588	100	13868	13209	-1.786	3117	10751	3026	10183	246096
36	1	11	AlexaAntiMouseAb~N/A	HA20457~B36R11C01	16420	40690	110	3166	3135	1237	39	46	46	46	3	6	100	100	0	9770	9185	1839	20	126	126	132	36	27	100	100	0	0.324	0.341	0.353	0.306	1.832	0.347	0.831	80	580	100	12764	12148	-1.628	3120	9644	3089	9059	250813
27	2	1	AlexaAntiMouseAb~N/A	HA20457~B27R01C02	12030	29730	110	3166	3064	1219	39	48	48	49	11	22	98	98	0	10799	9768	2771	28	106	106	138	95	68	100	100	0	0.292	0.312	0.319	0.272	1.910	0.311	0.860	80	589	100	13811	12678	-1.778	3118	10693	3016	9662	245136
32	1	1	AlexaAntiMouseAb~N/A	HA20457~B32R01C01	16320	34200	110	3166	2891	2213	76	48	48	72	186	258	77	75	0	11647	8772	4666	53	163	163	284	296	104	92	87	0	0.272	0.330	0.298	0.155	4.921	0.356	0.856	80	642	100	14602	11452	-1.881	3118	11484	2843	8609	231255
47	7	16	Hs~Ref:NM_139016.2~uORF:IOH27635~RFU:32656.25	HA20457~B47R16C07	13170	55220	110	3165	3168	761	24	93	93	397	549	138	100	100	0	1763	1729	121	6	324	324	379	236	62	100	100	0	2.135	2.189	2.182	2.133	1.299	2.515	0.723	80	567	100	4511	4480	1.094	3072	1439	3075	1405	253418
18	13	16	Hs~Ref:NM_014220.2~uORF:IOH59024~RFU:13783.48	HA20457~B18R16C13	9650	23730	110	3165	3099	917	29	48	48	48	3	6	100	100	0	287	280	48	17	98	98	101	14	13	100	100	0	16.492	16.764	16.350	16.701	1.537	19.047	0.765	80	568	100	3306	3233	4.044	3117	189	3051	182	247956
18	1	1	AlexaAntiMouseAb~N/A	HA20457~B18R01C01	7220	20730	110	3162	2996	1317	43	50	50	100	109	109	98	97	0	10695	10305	1205	11	211	211	242	144	59	100	100	0	0.297	0.292	0.310	0.233	2.596	0.293	0.788	80	602	100	13596	13040	-1.752	3112	10484	2946	10094	239673
29	1	1	AlexaAntiMouseAb~N/A	HA20457~B29R01C01	2850	34240	110	3155	3206	975	30	48	48	68	95	139	100	100	0	11071	11156	1039	9	285	285	369	244	66	100	100	0	0.288	0.290	0.290	0.275	1.407	0.289	0.866	80	592	100	13893	14029	-1.796	3107	10786	3158	10871	256507
29	22	1	AlexaAntiMouseAb~N/A	HA20457~B29R01C22	7040	34220	110	3155	3034	1324	43	47	47	50	25	50	98	97	0	12732	11573	2989	25	127	127	250	207	82	100	100	0	0.247	0.261	0.241	0.223	1.919	0.267	0.858	80	602	100	15713	14433	-2.020	3108	12605	2987	11446	242751
28	1	1	AlexaAntiMouseAb~N/A	HA20457~B28R01C01	16300	29690	110	3132	2987	1122	37	50	50	89	107	120	97	96	0	10125	8970	2698	30	233	233	267	150	56	100	100	0	0.312	0.336	0.331	0.311	2.293	0.314	0.765	80	602	100	12974	11674	-1.682	3082	9892	2937	8737	238929
47	1	11	AlexaAntiMouseAb~N/A	HA20457~B47R11C01	11970	54220	110	3130	2932	1300	44	48	48	201	453	225	96	91	0	11286	10485	2134	20	222	222	336	205	61	100	100	0	0.279	0.281	0.279	0.244	1.695	0.288	0.854	80	578	100	14146	13147	-1.844	3082	11064	2884	10263	234566
16	21	1	AlexaAntiMouseAb~N/A	HA20457~B16R01C21	20260	16200	110	3129	2836	919	32	48	48	54	37	68	100	100	0	9086	8059	2427	30	152	152	179	83	46	98	98	0	0.345	0.353	0.359	0.379	2.187	0.331	0.840	80	588	100	12015	10695	-1.536	3081	8934	2788	7907	226882
47	8	16	Hs~Ref:NM_139016.2~uORF:IOH27635~RFU:35706.85	HA20457~B47R16C08	13370	55210	110	3126	3095	998	32	50	50	402	654	162	98	98	0	1318	1306	165	12	188	188	327	227	69	100	100	0	2.722	2.724	2.623	2.594	1.482	3.043	0.762	80	593	100	4206	4163	1.445	3076	1130	3045	1118	247619
19	21	1	AlexaAntiMouseAb~N/A	HA20457~B19R01C21	15790	20700	110	3123	2841	1033	36	48	48	49	10	20	100	100	0	10475	10090	1434	14	120	120	195	139	71	100	100	0	0.297	0.280	0.287	0.255	1.570	0.281	0.798	80	604	100	13430	12763	-1.752	3075	10355	2793	9970	227304
5	22	1	AlexaAntiMouseAb~N/A	HA20457~B05R01C22	6870	7260	110	3122	3011	1058	35	48	48	63	59	93	96	96	0	11745	11449	1730	15	218	218	249	123	49	100	100	0	0.267	0.264	0.266	0.218	2.672	0.267	0.867	80	602	100	14601	14194	-1.907	3074	11527	2963	11231	240850
13	17	9	Hs~MGC:BC008902.2~uORF:IOH46064~RFU:29999.07	HA20457~B13R09C17	5930	17860	110	3122	2983	1099	36	48	48	66	78	118	100	100	0	1916	1827	378	20	103	103	121	42	34	100	100	0	1.696	1.702	1.721	1.623	1.466	1.847	0.856	80	548	100	4887	4659	0.762	3074	1813	2935	1724	238614
19	2	1	AlexaAntiMouseAb~N/A	HA20457~B19R01C02	11990	20710	110	3120	3004	820	27	49	49	57	38	66	100	100	0	11482	11011	1698	15	106	106	198	159	80	100	100	0	0.270	0.271	0.275	0.260	1.382	0.266	0.899	80	597	100	14447	13860	-1.889	3071	11376	2955	10905	240299
43	17	3	Hs~MGC:BC036391.1~uORF:IOH22062~RFU:7088.91	HA20457~B43R03C17	15090	48090	110	3116	3398	1287	37	47	47	63	89	141	100	100	0	554	546	39	7	119	119	123	30	24	100	100	0	7.055	7.848	6.979	7.340	1.507	11.551	0.686	80	546	100	3504	3778	2.819	3069	435	3351	427	271867
5	21	1	AlexaAntiMouseAb~N/A	HA20457~B05R01C21	6670	7250	110	3114	3085	1134	36	47	47	53	56	105	100	100	0	12541	11797	2033	17	178	178	217	120	55	100	100	0	0.248	0.261	0.266	0.233	1.749	0.268	0.861	80	576	100	15430	14657	-2.011	3067	12363	3038	11619	246780
19	7	9	Hs~Ref:NM_006246.2~uORF:IOH29856~RFU:25623.36	HA20457~B19R09C07	12980	22320	110	3113	3029	576	19	50	50	80	136	170	100	100	0	343	342	35	10	133	133	149	52	34	100	100	0	14.586	14.254	14.232	14.200	1.288	17.544	0.710	80	558	100	3273	3188	3.866	3063	210	2979	209	242329
33	21	1	AlexaAntiMouseAb~N/A	HA20457~B33R01C21	6850	38720	110	3103	2775	906	32	48	48	51	17	33	100	100	0	12304	11588	1659	14	285	285	340	195	57	100	100	0	0.254	0.241	0.255	0.224	1.477	0.246	0.876	80	606	100	15074	14030	-1.976	3055	12019	2727	11303	222023
32	21	1	AlexaAntiMouseAb~N/A	HA20457~B32R01C21	20340	34190	110	3101	2745	1522	55	47	47	47	6	12	100	98	0	11991	9555	4719	49	96	96	159	123	77	100	100	0	0.257	0.285	0.291	0.261	2.426	0.273	0.830	80	615	100	14949	12157	-1.962	3054	11895	2698	9459	219639
36	1	1	AlexaAntiMouseAb~N/A	HA20457~B36R01C01	16350	38690	110	3100	2989	1082	36	47	47	47	3	6	100	100	0	11055	10041	2428	24	144	144	174	71	40	100	100	0	0.280	0.297	0.306	0.277	1.732	0.302	0.863	80	608	100	13964	12839	-1.837	3053	10911	2942	9897	239102
35	21	1	AlexaAntiMouseAb~N/A	HA20457~B35R01C21	15840	38690	110	3092	2945	1180	40	46	46	46	2	4	100	100	0	11234	10326	2453	23	135	135	143	33	23	100	100	0	0.274	0.284	0.280	0.253	1.680	0.291	0.888	80	606	100	14145	13090	-1.865	3046	11099	2899	10191	235581
48	22	1	AlexaAntiMouseAb~N/A	HA20457~B48R01C22	20660	52210	110	3086	3111	1065	34	47	47	47	7	14	100	100	0	12094	11248	2750	24	126	126	154	91	59	100	100	0	0.254	0.275	0.274	0.261	1.557	0.270	0.871	80	620	100	15007	14186	-1.978	3039	11968	3064	11122	248872
12	10	19	Hs~Ref:NM_006775.1~uORF:IOH10720~RFU:9863.28	HA20457~B12R19C10	18040	15310	110	3079	3459	1229	35	49	49	90	122	135	100	100	0	744	711	103	14	101	101	108	23	21	100	100	0	4.712	5.590	5.271	5.356	1.391	6.923	0.744	80	548	100	3673	4020	2.236	3030	643	3410	610	276717
18	2	1	AlexaAntiMouseAb~N/A	HA20457~B18R01C02	7420	20720	110	3078	3199	1442	45	49	49	86	82	95	100	100	0	10550	10054	1387	13	179	179	209	125	59	100	100	0	0.292	0.319	0.315	0.286	1.609	0.309	0.765	80	594	100	13400	13025	-1.776	3029	10371	3150	9875	255946
17	22	1	AlexaAntiMouseAb~N/A	HA20457~B17R01C22	6910	20750	110	3078	2881	1118	38	49	49	49	8	16	100	100	0	10624	9242	2756	29	167	167	209	148	70	100	100	0	0.290	0.312	0.288	0.304	1.622	0.304	0.840	80	612	100	13486	11907	-1.788	3029	10457	2832	9075	230496
26	1	1	AlexaAntiMouseAb~N/A	HA20457~B26R01C01	7300	29770	110	3069	3145	989	31	47	47	47	7	14	100	100	0	11039	10366	1743	16	128	128	146	62	42	100	100	0	0.277	0.303	0.293	0.286	1.433	0.306	0.878	80	612	100	13933	13336	-1.852	3022	10911	3098	10238	251591
29	2	11	AlexaAntiMouseAb~N/A	HA20457~B29R11C02	3060	36250	110	3060	2900	1145	39	47	47	51	25	49	100	98	0	10968	10466	1755	16	159	159	233	139	59	100	100	0	0.279	0.277	0.275	0.237	1.843	0.283	0.861	80	567	100	13822	13160	-1.843	3013	10809	2853	10307	232038
28	2	11	AlexaAntiMouseAb~N/A	HA20457~B28R11C02	16510	31690	110	3059	2849	1113	39	48	48	48	7	14	100	100	0	8997	8663	1306	15	93	93	126	72	57	100	100	0	0.338	0.327	0.361	0.283	1.944	0.332	0.834	80	576	100	11915	11371	-1.564	3011	8904	2801	8570	227940
11	2	1	AlexaAntiMouseAb~N/A	HA20457~B11R01C02	11890	11700	110	3055	2877	775	26	49	49	112	171	152	100	100	0	11041	10883	1084	9	208	208	230	134	58	100	100	0	0.277	0.265	0.274	0.254	1.345	0.251	0.848	80	555	100	13839	13503	-1.850	3006	10833	2828	10675	230193
37	2	11	AlexaAntiMouseAb~N/A	HA20457~B37R11C02	3080	45300	110	3050	2791	1150	41	50	50	154	233	151	98	96	0	10857	9644	3037	31	445	445	457	284	62	100	98	0	0.288	0.298	0.295	0.291	1.356	0.277	0.850	80	578	100	13412	11940	-1.795	3000	10412	2741	9199	223281
12	1	1	AlexaAntiMouseAb~N/A	HA20457~B12R01C01	16200	11700	110	3045	2810	891	31	48	48	55	35	63	100	98	0	10182	9254	2515	27	113	113	198	154	77	100	100	0	0.298	0.302	0.306	0.285	1.704	0.296	0.815	80	620	100	13066	11903	-1.748	2997	10069	2762	9141	224811
39	2	11	AlexaAntiMouseAb~N/A	HA20457~B39R11C02	12070	45250	110	3039	3035	959	31	47	47	48	8	16	100	100	0	11682	11629	1173	10	143	143	230	153	66	100	100	0	0.259	0.260	0.255	0.242	1.580	0.258	0.817	80	552	100	14531	14474	-1.947	2992	11539	2988	11486	242825
48	2	11	AlexaAntiMouseAb~N/A	HA20457~B48R11C02	16690	54230	110	3033	2825	1132	40	46	46	57	47	82	98	98	0	9272	8905	1738	19	231	231	303	331	109	100	100	0	0.330	0.320	0.314	0.280	1.988	0.325	0.841	80	556	100	12028	11453	-1.598	2987	9041	2779	8674	226014
40	21	1	AlexaAntiMouseAb~N/A	HA20457~B40R01C21	20390	43210	110	3032	2855	960	33	47	47	47	5	10	100	100	0	12490	11335	2903	25	152	152	245	186	75	100	100	0	0.242	0.251	0.254	0.247	1.651	0.234	0.786	80	580	100	15323	13991	-2.047	2985	12338	2808	11183	228439
15	1	1	AlexaAntiMouseAb~N/A	HA20457~B15R01C01	11760	16190	110	3030	3070	1134	36	51	51	109	122	111	100	100	0	11664	10702	2207	20	251	251	294	157	53	100	100	0	0.261	0.289	0.294	0.275	1.406	0.282	0.857	80	602	100	14392	13470	-1.938	2979	11413	3019	10451	245605
29	21	1	AlexaAntiMouseAb~N/A	HA20457~B29R01C21	6850	34230	110	3026	3153	1216	38	47	47	47	5	10	100	100	0	12501	11487	2491	21	135	135	264	205	77	100	100	0	0.241	0.274	0.259	0.261	1.475	0.276	0.874	80	579	100	15345	14458	-2.053	2979	12366	3106	11352	252228
29	2	1	AlexaAntiMouseAb~N/A	HA20457~B29R01C02	3040	34230	110	3026	2931	723	24	48	48	69	86	124	100	100	0	11193	11037	858	7	213	213	283	172	60	100	100	0	0.271	0.266	0.273	0.257	1.393	0.263	0.875	80	570	100	13958	13707	-1.882	2978	10980	2883	10824	234493
21	1	1	AlexaAntiMouseAb~N/A	HA20457~B21R01C01	2770	25250	110	3026	2781	794	28	48	48	49	5	10	100	100	0	10758	10257	1604	15	122	122	140	59	42	100	100	0	0.280	0.270	0.281	0.258	1.362	0.272	0.914	80	602	100	13614	12868	-1.837	2978	10636	2733	10135	222476
18	22	1	AlexaAntiMouseAb~N/A	HA20457~B18R01C22	11420	20720	110	3025	2772	1208	43	49	49	60	56	93	95	92	0	10759	10119	2028	20	127	127	203	149	73	100	100	0	0.280	0.273	0.295	0.203	2.960	0.279	0.838	80	602	100	13608	12715	-1.837	2976	10632	2723	9992	221751
33	22	1	AlexaAntiMouseAb~N/A	HA20457~B33R01C22	7050	38720	110	3023	2872	1027	35	48	48	65	76	116	100	100	0	12265	11553	1697	14	163	163	290	204	70	100	100	0	0.246	0.248	0.256	0.230	1.471	0.255	0.854	80	621	100	15077	14214	-2.024	2975	12102	2824	11390	229737
43	2	11	AlexaAntiMouseAb~N/A	HA20457~B43R11C02	12080	49700	110	3022	2763	1154	41	46	46	67	138	205	97	91	0	10473	9715	2109	21	164	164	242	141	58	100	100	0	0.289	0.284	0.292	0.247	1.798	0.291	0.876	80	575	100	13285	12268	-1.792	2976	10309	2717	9551	221038
6	21	1	AlexaAntiMouseAb~N/A	HA20457~B06R01C21	11150	7230	110	3021	2936	937	31	47	47	48	8	16	100	100	0	11540	10621	2293	21	144	144	161	64	39	100	100	0	0.261	0.276	0.273	0.268	1.558	0.257	0.814	80	586	100	14370	13366	-1.938	2974	11396	2889	10477	234877
16	2	1	AlexaAntiMouseAb~N/A	HA20457~B16R01C02	16450	16210	110	3020	2738	1175	42	50	50	78	85	108	98	96	0	10309	9395	2533	26	161	161	205	131	63	100	100	0	0.293	0.291	0.295	0.260	1.973	0.288	0.838	80	566	100	13118	11922	-1.773	2970	10148	2688	9234	219043
43	2	1	AlexaAntiMouseAb~N/A	HA20457~B43R01C02	12090	47700	110	3005	3116	978	31	50	50	87	83	95	100	100	0	11935	11575	1217	10	260	260	320	157	49	100	100	0	0.253	0.271	0.254	0.255	1.478	0.268	0.802	80	599	100	14630	14381	-1.982	2955	11675	3066	11315	249265
4	6	5	Hs~Ref:NM_007278.1~uORF:IOH41289~RFU:19029.48	HA20457~B04R05C06	17190	3500	110	2999	2976	651	21	51	51	112	172	153	100	100	0	1754	1730	281	16	142	142	175	152	86	100	100	0	1.829	1.842	1.857	1.842	1.459	1.987	0.755	80	558	100	4560	4513	0.871	2948	1612	2925	1588	238107
22	21	1	AlexaAntiMouseAb~N/A	HA20457~B22R01C21	11230	25210	110	2997	2889	1048	36	49	49	51	18	35	100	100	0	11775	10701	2872	26	171	171	251	164	65	100	100	0	0.254	0.270	0.281	0.258	2.095	0.250	0.786	80	578	100	14552	13370	-1.977	2948	11604	2840	10530	231134
5	2	1	AlexaAntiMouseAb~N/A	HA20457~B05R01C02	2870	7270	110	2996	2964	836	28	47	47	58	72	124	100	100	0	11629	11292	1024	9	153	153	195	115	58	100	100	0	0.257	0.262	0.256	0.252	1.318	0.253	0.855	80	599	100	14425	14056	-1.960	2949	11476	2917	11139	237128
15	2	1	AlexaAntiMouseAb~N/A	HA20457~B15R01C02	11950	16190	110	2992	3079	1044	33	48	48	76	87	114	100	100	0	11605	10420	2650	25	143	143	215	150	69	100	100	0	0.257	0.295	0.276	0.291	1.523	0.283	0.866	80	580	100	14406	13308	-1.961	2944	11462	3031	10277	246292
42	21	1	AlexaAntiMouseAb~N/A	HA20457~B42R01C21	11400	47720	110	2987	3023	1520	50	48	48	62	125	201	93	92	0	12631	10613	3799	35	452	452	473	213	45	100	100	0	0.241	0.293	0.290	0.237	2.220	0.292	0.814	80	607	100	15118	13136	-2.051	2939	12179	2975	10161	241835
21	2	1	AlexaAntiMouseAb~N/A	HA20457~B21R01C02	2970	25250	110	2981	3022	857	28	48	48	51	29	56	100	100	0	10636	10247	1445	14	117	117	135	63	46	100	100	0	0.279	0.294	0.298	0.284	1.356	0.289	0.885	80	580	100	13452	13104	-1.843	2933	10519	2974	10130	241725
29	1	11	AlexaAntiMouseAb~N/A	HA20457~B29R11C01	2860	36250	110	2978	2870	909	31	47	47	49	19	38	100	98	0	10657	10486	1116	10	164	164	289	211	73	100	100	0	0.279	0.273	0.273	0.245	1.825	0.283	0.878	80	589	100	13424	13145	-1.840	2931	10493	2823	10322	229603
23	1	11	AlexaAntiMouseAb~N/A	HA20457~B23R11C01	11760	27240	110	2977	2944	757	25	61	61	242	322	133	100	100	0	10328	10016	1361	13	315	315	351	231	65	100	100	0	0.291	0.297	0.296	0.292	1.394	0.281	0.853	80	568	100	12929	12584	-1.780	2916	10013	2883	9701	235517
26	2	1	AlexaAntiMouseAb~N/A	HA20457~B26R01C02	7500	29770	110	2966	2852	932	32	47	47	49	22	44	100	100	0	10573	9958	1825	18	121	121	141	62	43	100	100	0	0.279	0.285	0.273	0.270	1.382	0.289	0.901	80	600	100	13371	12642	-1.840	2919	10452	2805	9837	228149
18	14	16	Hs~Ref:NM_014220.2~uORF:IOH59024~RFU:14852.12	HA20457~B18R16C14	9850	23720	110	2965	3150	1306	41	48	48	50	20	40	100	100	0	274	274	30	10	96	96	98	19	19	100	100	0	16.388	17.427	16.709	15.793	1.608	20.802	0.767	80	577	100	3095	3280	4.035	2917	178	3102	178	251999
41	21	7	Hs~MGC:BC011739.2~uORF:IOH14463~RFU:10830.54	HA20457~B41R07C21	6930	48980	110	2964	2961	748	25	49	49	65	58	89	100	100	0	1900	1822	182	9	170	170	193	72	37	100	100	0	1.685	1.763	1.807	1.701	1.395	1.969	0.793	80	576	100	4645	4564	0.753	2915	1730	2912	1652	236873
12	2	11	AlexaAntiMouseAb~N/A	HA20457~B12R11C02	16430	13710	110	2963	2957	1093	36	47	47	47	2	4	100	100	0	8899	8154	2248	27	92	92	139	87	62	100	100	0	0.331	0.361	0.341	0.358	2.168	0.334	0.759	80	554	100	11723	10972	-1.595	2916	8807	2910	8062	236582
4	5	5	Hs~Ref:NM_007278.1~uORF:IOH41289~RFU:17981.44	HA20457~B04R05C05	16990	3510	110	2961	2975	566	19	50	50	107	133	124	100	100	0	1952	1959	191	9	163	163	188	133	70	100	100	0	1.627	1.629	1.558	1.607	1.265	1.747	0.796	80	586	100	4700	4721	0.702	2911	1789	2925	1796	237986
30	2	1	AlexaAntiMouseAb~N/A	HA20457~B30R01C02	7480	34240	110	2960	2927	1078	36	49	49	89	118	132	100	98	0	12505	12319	996	8	205	205	312	191	61	100	100	0	0.237	0.238	0.242	0.208	1.854	0.237	0.772	80	606	100	15211	14992	-2.079	2911	12300	2878	12114	234132
9	21	1	AlexaAntiMouseAb~N/A	HA20457~B09R01C21	6710	11730	110	2952	2711	1267	46	47	47	57	80	140	98	97	0	10921	10135	2055	20	169	169	209	142	67	100	100	0	0.270	0.267	0.296	0.216	2.378	0.275	0.776	80	608	100	13657	12630	-1.888	2905	10752	2664	9966	216896
21	1	11	AlexaAntiMouseAb~N/A	HA20457~B21R11C01	2780	27260	110	2951	2994	908	30	48	48	49	15	30	100	100	0	9742	9280	1446	15	112	112	127	51	40	100	100	0	0.301	0.321	0.311	0.309	1.379	0.318	0.856	80	570	100	12533	12114	-1.730	2903	9630	2946	9168	239533
20	17	9	Hs~Ref:NM_013375.2~uORF:IOH1920~RFU:21117.9	HA20457~B20R09C17	19450	22280	110	2951	2977	644	21	50	50	105	181	172	100	100	0	1893	1944	322	16	125	125	131	59	45	100	100	0	1.641	1.609	1.585	1.596	1.360	1.726	0.791	80	574	100	4669	4746	0.714	2901	1768	2927	1819	238192
32	1	11	AlexaAntiMouseAb~N/A	HA20457~B32R11C01	16330	36210	110	2951	2890	817	28	47	47	48	12	25	100	100	0	9593	9022	2180	24	124	124	140	48	34	100	100	0	0.307	0.320	0.317	0.320	1.457	0.307	0.878	80	596	100	12373	11741	-1.705	2904	9469	2843	8898	231173
27	22	1	AlexaAntiMouseAb~N/A	HA20457~B27R01C22	16010	29720	110	2924	2464	1775	72	49	49	159	225	141	78	76	0	10405	7832	4307	54	241	241	306	226	73	98	91	0	0.283	0.318	0.335	0.205	3.237	0.338	0.838	80	591	100	13039	10006	-1.822	2875	10164	2415	7591	197115
25	2	1	AlexaAntiMouseAb~N/A	HA20457~B25R01C02	2970	29750	110	2916	2872	1225	42	48	48	53	41	77	100	100	0	10190	9829	1281	13	122	122	132	48	36	100	100	0	0.285	0.291	0.288	0.251	1.776	0.295	0.799	80	577	100	12936	12531	-1.812	2868	10068	2824	9707	229736
7	2	1	AlexaAntiMouseAb~N/A	HA20457~B07R01C02	11900	7230	110	2909	2832	867	30	47	47	51	37	72	100	100	0	11828	11533	1302	11	117	117	137	58	42	100	100	0	0.244	0.244	0.246	0.230	1.457	0.238	0.862	80	580	100	14573	14201	-2.033	2862	11711	2785	11416	226559
38	1	1	AlexaAntiMouseAb~N/A	HA20457~B38R01C01	7340	43240	110	2900	3103	1399	45	47	47	78	131	167	98	98	0	13427	12727	1921	15	214	214	394	281	71	100	100	0	0.216	0.244	0.232	0.207	1.877	0.252	0.813	80	602	100	16066	15569	-2.211	2853	13213	3056	12513	248235
43	1	11	AlexaAntiMouseAb~N/A	HA20457~B43R11C01	11890	49710	110	2900	2841	1017	35	46	46	47	8	17	100	100	0	10494	10109	1571	15	391	391	367	159	43	100	100	0	0.282	0.288	0.275	0.255	1.742	0.286	0.855	80	579	100	12957	12513	-1.824	2854	10103	2795	9718	227311
30	2	11	AlexaAntiMouseAb~N/A	HA20457~B30R11C02	7500	36270	110	2895	2793	836	29	46	46	47	10	21	100	100	0	9918	9643	1483	15	132	132	191	100	52	100	100	0	0.291	0.289	0.306	0.278	1.514	0.269	0.783	80	558	100	12635	12258	-1.780	2849	9786	2747	9511	223465
38	2	11	AlexaAntiMouseAb~N/A	HA20457~B38R11C02	7540	45240	110	2893	2701	966	35	46	46	63	84	133	100	100	0	10443	10120	982	9	165	165	245	140	57	100	100	0	0.277	0.267	0.284	0.242	1.576	0.270	0.844	80	575	100	13125	12610	-1.852	2847	10278	2655	9955	216066
10	2	11	AlexaAntiMouseAb~N/A	HA20457~B10R11C02	7380	13740	110	2892	2770	803	28	48	48	52	28	53	100	100	0	9279	8928	1155	12	134	134	157	70	44	100	100	0	0.311	0.310	0.324	0.296	1.422	0.303	0.866	80	568	100	11989	11516	-1.685	2844	9145	2722	8794	221572
6	22	1	AlexaAntiMouseAb~N/A	HA20457~B06R01C22	11350	7230	110	2881	2902	666	22	48	48	65	63	96	100	100	0	11772	11220	1505	13	143	143	167	69	41	100	100	0	0.244	0.258	0.258	0.253	1.264	0.253	0.911	80	630	100	14462	13931	-2.037	2833	11629	2854	11077	232133
47	2	9	Hs~Ref:NM_152770.1~uORF:IOH22874~RFU:19341.7	HA20457~B47R09C02	12160	53810	110	2878	2955	1082	36	105	105	2486	4679	188	0	0	0	696	683	62	9	187	187	219	75	34	100	98	0	5.448	5.746	5.714	5.335	1.490	57.357	0.098	80	566	100	3282	3346	2.446	2773	509	2850	496	236381
40	2	11	AlexaAntiMouseAb~N/A	HA20457~B40R11C02	16580	45220	110	2854	2689	915	34	47	47	50	20	40	100	100	0	9820	9456	1244	13	146	146	158	39	24	100	100	0	0.290	0.284	0.286	0.266	1.384	0.291	0.877	80	575	100	12481	11952	-1.785	2807	9674	2642	9310	215100
19	8	9	Hs~Ref:NM_006246.2~uORF:IOH29856~RFU:26469.43	HA20457~B19R09C08	13180	22310	110	2852	2867	659	22	49	49	71	107	150	100	100	0	371	409	179	43	101	101	125	47	37	100	100	0	10.381	9.149	10.509	9.663	1.523	6.393	0.027	80	574	100	3073	3126	3.376	2803	270	2818	308	229382
41	21	1	AlexaAntiMouseAb~N/A	HA20457~B41R01C21	6930	47760	110	2843	2984	1364	45	48	48	56	40	71	100	100	0	12122	10172	3815	37	169	169	266	185	69	100	98	0	0.234	0.294	0.290	0.307	1.795	0.282	0.843	80	586	100	14748	12939	-2.096	2795	11953	2936	10003	238681
26	1	11	AlexaAntiMouseAb~N/A	HA20457~B26R11C01	7320	31780	110	2834	2655	788	29	47	47	48	14	29	100	100	0	9900	9186	2003	21	120	120	124	22	17	100	100	0	0.285	0.288	0.282	0.279	1.685	0.277	0.854	80	598	100	12567	11674	-1.811	2787	9780	2608	9066	212370
44	2	11	AlexaAntiMouseAb~N/A	HA20457~B44R11C02	16630	49680	110	2830	2842	769	27	47	47	53	29	54	100	100	0	10099	9778	1014	10	197	197	238	97	40	100	100	0	0.281	0.292	0.293	0.281	1.293	0.284	0.882	80	568	100	12685	12376	-1.831	2783	9902	2795	9581	227322
8	1	1	AlexaAntiMouseAb~N/A	HA20457~B08R01C01	16160	7180	110	2830	2673	811	30	47	47	66	56	84	100	98	0	10912	10862	972	8	132	132	159	75	47	100	100	0	0.258	0.245	0.254	0.224	1.693	0.230	0.804	80	612	100	13563	13356	-1.954	2783	10780	2626	10730	213808
16	1	1	AlexaAntiMouseAb~N/A	HA20457~B16R01C01	16260	16210	110	2830	2665	1131	42	49	49	71	69	97	100	100	0	10519	10063	1452	14	200	200	253	167	66	100	100	0	0.270	0.265	0.272	0.237	1.760	0.252	0.744	80	611	100	13100	12479	-1.892	2781	10319	2616	9863	213217
23	2	11	AlexaAntiMouseAb~N/A	HA20457~B23R11C02	11940	27240	110	2829	2747	1235	44	50	50	184	254	138	92	91	0	10488	8985	3366	37	187	187	323	258	79	98	97	0	0.270	0.307	0.295	0.254	2.653	0.301	0.870	80	564	100	13080	11495	-1.890	2779	10301	2697	8798	219780
37	2	1	AlexaAntiMouseAb~N/A	HA20457~B37R01C02	3060	43280	110	2829	2603	1155	44	47	47	53	36	67	96	96	0	11974	11248	1900	16	172	172	273	198	72	100	100	0	0.236	0.231	0.253	0.180	3.075	0.226	0.753	80	590	100	14584	13632	-2.085	2782	11802	2556	11076	208209
12	19	5	Hs~MGC:BC064984.1~uORF:IOH40665~RFU:38359.17	HA20457~B12R05C19	19810	12500	110	2823	2739	828	30	52	52	210	294	140	100	97	0	1597	1532	256	16	167	167	243	157	64	100	100	0	1.938	1.968	2.020	1.884	1.376	2.121	0.817	80	562	100	4201	4052	0.954	2771	1430	2687	1365	219122
10	1	1	AlexaAntiMouseAb~N/A	HA20457~B10R01C01	7170	11730	110	2822	2592	806	31	51	51	98	112	114	97	97	0	10373	10330	840	8	252	252	265	109	41	100	100	0	0.274	0.252	0.266	0.218	2.311	0.244	0.831	80	612	100	12892	12619	-1.869	2771	10121	2541	10078	207355
48	22	9	Hs~Ref:NM_018454.4~uORF:IOH3087~RFU:5876.64	HA20457~B48R09C22	20700	53820	110	2820	2824	610	21	46	46	46	4	8	100	100	0	1713	1742	375	21	127	127	128	22	17	100	100	0	1.749	1.720	1.705	1.715	1.396	1.793	0.837	80	580	100	4360	4393	0.807	2774	1586	2778	1615	225949
9	2	1	AlexaAntiMouseAb~N/A	HA20457~B09R01C02	2900	11720	110	2817	2754	1101	39	48	48	55	40	72	98	97	0	11231	11013	1024	9	184	184	207	98	47	100	100	0	0.251	0.250	0.250	0.210	2.290	0.244	0.789	80	592	100	13816	13535	-1.996	2769	11047	2706	10829	220293
9	18	16	Hs~Ref:NM_001008896.1~uORF:IOH50198~RFU:14961.79	HA20457~B09R16C18	6130	14720	110	2805	2918	804	27	50	50	109	285	261	100	100	0	700	703	86	12	95	95	108	48	44	100	100	0	4.554	4.717	4.474	4.588	1.511	5.650	0.682	80	568	100	3360	3476	2.187	2755	605	2868	608	233436
33	2	1	AlexaAntiMouseAb~N/A	HA20457~B33R01C02	3040	38740	110	2798	2578	642	24	48	48	57	39	68	100	100	0	10857	10491	1396	13	201	201	277	157	56	100	100	0	0.258	0.246	0.255	0.240	1.344	0.233	0.825	80	578	100	13406	12820	-1.954	2750	10656	2530	10290	206228
40	1	11	AlexaAntiMouseAb~N/A	HA20457~B40R11C01	16390	45220	110	2794	2816	772	27	48	48	48	6	12	100	100	0	10047	9706	968	9	161	161	225	125	55	100	100	0	0.278	0.290	0.284	0.272	1.515	0.284	0.876	80	580	100	12632	12313	-1.848	2746	9886	2768	9545	225240
12	21	1	AlexaAntiMouseAb~N/A	HA20457~B12R01C21	20210	11680	110	2790	2836	954	33	48	48	48	5	10	100	100	0	10003	9057	2326	25	180	180	231	103	44	100	100	0	0.279	0.314	0.319	0.307	1.573	0.306	0.859	80	589	100	12565	11665	-1.841	2742	9823	2788	8877	226840
24	2	11	AlexaAntiMouseAb~N/A	HA20457~B24R11C02	16470	27220	110	2790	2638	1147	43	48	48	49	7	14	100	98	0	9309	8084	2569	31	103	103	170	117	68	100	100	0	0.298	0.325	0.325	0.295	1.979	0.332	0.879	80	559	100	11948	10571	-1.747	2742	9206	2590	7981	211060
11	2	11	AlexaAntiMouseAb~N/A	HA20457~B11R11C02	11890	13690	110	2789	2652	976	36	49	49	131	172	131	100	100	0	9387	8972	1487	16	237	237	227	110	48	100	100	0	0.299	0.298	0.307	0.276	1.683	0.282	0.777	80	558	100	11890	11338	-1.740	2740	9150	2603	8735	212158
43	3	14	Hs~Ref:NM_194290.1~uORF:IOH42276~RFU:20984.93	HA20457~B43R14C03	12300	50300	110	2787	2814	834	29	483	483	573	539	94	100	96	0	1807	1920	768	40	489	489	406	179	44	100	100	0	1.748	1.629	1.732	1.589	1.630	1.397	0.414	80	558	100	3622	3762	0.806	2304	1318	2331	1431	225146
16	1	11	AlexaAntiMouseAb~N/A	HA20457~B16R11C01	16290	18220	110	2786	2643	919	34	47	47	48	7	14	100	100	0	8541	8151	1133	13	104	104	170	109	64	100	100	0	0.325	0.323	0.344	0.296	1.743	0.309	0.794	80	590	100	11176	10643	-1.623	2739	8437	2596	8047	211416
47	4	7	Hs~MGC:BC036076.1~uORF:IOH27281~RFU:2920.31	HA20457~B47R07C04	12560	53410	110	2781	2674	1023	38	46	46	1233	7250	587	0	0	0	374	381	73	19	166	166	168	38	22	100	100	0	13.149	12.223	13.446	11.531	1.756	16.986	0.546	80	577	100	2943	2843	3.717	2735	208	2628	215	213887
44	16	4	Hs~Ref:NM_016648.1~uORF:IOH41297~RFU:33710.01	HA20457~B44R04C16	19420	48260	110	2779	2671	602	22	46	46	56	60	107	100	100	0	1151	1170	145	12	105	105	111	32	28	100	100	0	2.613	2.465	2.655	2.418	1.347	2.517	0.820	80	568	100	3779	3690	1.386	2733	1046	2625	1065	213660
34	2	11	AlexaAntiMouseAb~N/A	HA20457~B34R11C02	7510	40750	110	2777	2652	1287	48	47	47	50	54	108	98	97	0	9965	8849	2747	31	142	142	201	116	57	100	100	0	0.278	0.299	0.294	0.252	1.724	0.316	0.894	80	576	100	12553	11312	-1.847	2730	9823	2605	8707	212156
12	19	14	Hs~Ref:NM_000525.3~uORF:IOH60138~RFU:4712.88	HA20457~B12R14C19	19830	14300	110	2775	2800	1204	43	46	46	47	6	12	100	100	0	382	370	54	14	101	101	100	10	10	100	100	0	9.712	10.238	9.462	9.336	1.654	12.322	0.764	80	567	100	3010	3023	3.280	2729	281	2754	269	224005
14	2	1	AlexaAntiMouseAb~N/A	HA20457~B14R01C02	7370	16230	110	2768	2530	876	34	50	50	108	159	147	100	98	0	10803	9987	1785	17	166	166	208	128	61	100	100	0	0.256	0.253	0.258	0.236	1.639	0.230	0.767	80	598	100	13355	12301	-1.968	2718	10637	2480	9821	202378
4	11	17	Hs~Ref:NM_024068.1~uORF:IOH6654~RFU:16669.21	HA20457~B04R17C11	18200	5910	110	2766	2736	790	28	51	51	164	223	135	100	100	0	2023	2017	102	5	156	156	222	201	90	100	100	0	1.454	1.443	1.472	1.384	1.319	1.619	0.747	80	565	100	4582	4546	0.540	2715	1867	2685	1861	218915
35	1	11	AlexaAntiMouseAb~N/A	HA20457~B35R11C01	11850	40700	110	2764	2630	716	27	49	49	74	113	152	100	100	0	9612	9385	1453	15	308	308	301	157	52	100	100	0	0.292	0.284	0.287	0.277	1.420	0.269	0.849	80	601	100	12019	11658	-1.777	2715	9304	2581	9077	210377
8	20	13	Hs~MGC:BC017305.1~uORF:IOH12450~RFU:40058.95	HA20457~B08R13C20	19980	9560	110	2758	2757	696	25	47	47	66	81	122	100	100	0	2028	2063	216	10	162	162	188	79	42	100	100	0	1.453	1.426	1.381	1.383	1.426	1.461	0.762	80	558	100	4577	4611	0.539	2711	1866	2710	1901	220592
45	21	1	AlexaAntiMouseAb~N/A	HA20457~B45R01C21	6880	52240	110	2756	2829	1236	43	49	49	116	204	175	98	97	0	11988	11168	2265	20	287	287	379	227	59	100	100	0	0.231	0.255	0.240	0.225	1.952	0.256	0.807	80	588	100	14408	13661	-2.112	2707	11701	2780	10881	226312
2	13	7	Hs~MGC:BC017941.1~uORF:IOH13654~RFU:25565.48	HA20457~B02R07C13	9560	3970	110	2746	2915	705	24	48	48	76	75	98	100	100	0	349	343	39	11	118	118	135	46	34	100	100	0	11.680	12.742	11.523	12.615	1.361	15.429	0.690	80	577	100	2929	3092	3.546	2698	231	2867	225	233204
38	1	11	AlexaAntiMouseAb~N/A	HA20457~B38R11C01	7350	45250	110	2745	2692	961	35	47	47	57	64	112	100	100	0	10427	9975	1607	16	360	360	344	156	45	100	100	0	0.268	0.275	0.268	0.258	1.542	0.265	0.821	80	590	100	12765	12260	-1.900	2698	10067	2645	9615	215367
23	8	12	Hs~MGC:BC032347.1~uORF:IOH21704~RFU:56108.08	HA20457~B23R12C08	13150	27440	110	2742	2709	797	29	51	51	199	280	140	100	100	0	1643	1683	176	10	168	168	201	84	41	100	100	0	1.824	1.754	1.708	1.685	1.364	1.761	0.771	80	560	100	4166	4173	0.867	2691	1475	2658	1515	216691
5	1	1	AlexaAntiMouseAb~N/A	HA20457~B05R01C01	2670	7270	110	2740	2550	696	27	47	47	48	6	12	100	100	0	10985	11068	792	7	136	136	171	106	61	100	100	0	0.248	0.229	0.239	0.219	1.337	0.218	0.841	80	623	100	13542	13435	-2.010	2693	10849	2503	10932	203976
22	2	11	AlexaAntiMouseAb~N/A	HA20457~B22R11C02	7430	27230	110	2734	2422	1153	47	47	47	50	23	46	100	97	0	9050	8508	1556	18	110	110	139	109	78	100	100	0	0.301	0.283	0.300	0.219	2.260	0.295	0.824	80	575	100	11627	10773	-1.734	2687	8940	2375	8398	193744
47	13	8	Hs~MGC:BC035568.1~uORF:IOH27552~RFU:21772.93	HA20457~B47R08C13	14380	53600	110	2733	2812	895	31	48	48	59	47	79	100	100	0	573	573	53	9	154	154	158	28	17	100	100	0	6.408	6.597	6.323	6.288	1.418	7.302	0.758	80	583	100	3104	3183	2.680	2685	419	2764	419	224985
19	1	11	AlexaAntiMouseAb~N/A	HA20457~B19R11C01	11780	22720	110	2732	2794	783	28	48	48	53	48	90	100	100	0	9624	9441	746	7	107	107	174	118	67	100	100	0	0.282	0.294	0.293	0.279	1.407	0.291	0.844	80	590	100	12201	12080	-1.826	2684	9517	2746	9334	223504
27	1	11	AlexaAntiMouseAb~N/A	HA20457~B27R11C01	11830	31740	110	2726	2642	697	26	47	47	47	2	4	100	100	0	9490	8832	1980	22	108	108	139	71	51	100	100	0	0.286	0.297	0.296	0.299	1.406	0.292	0.927	80	588	100	12061	11319	-1.808	2679	9382	2595	8724	211346
22	1	11	AlexaAntiMouseAb~N/A	HA20457~B22R11C01	7230	27240	110	2723	2605	1109	42	48	48	57	67	117	100	98	0	8931	8437	1562	18	110	110	155	150	96	100	100	0	0.303	0.307	0.311	0.265	1.705	0.317	0.850	80	599	100	11496	10884	-1.721	2675	8821	2557	8327	208427
7	2	11	AlexaAntiMouseAb~N/A	HA20457~B07R11C02	11900	9220	110	2717	2713	984	36	46	46	48	25	52	100	100	0	10942	10662	1282	12	103	103	157	94	59	100	100	0	0.246	0.253	0.252	0.232	1.466	0.257	0.869	80	546	100	13510	13226	-2.021	2671	10839	2667	10559	217058
40	11	5	Hs~Ref:NM_003600.1~N/A~RFU:17196.51	HA20457~B40R05C11	18390	44010	110	2708	2863	526	18	47	47	79	155	196	100	100	0	2487	2372	296	12	116	116	141	109	77	100	100	0	1.122	1.248	1.267	1.239	1.217	1.291	0.865	80	567	100	5032	5072	0.166	2661	2371	2816	2256	229022
43	21	22	AlexaAntiMouseAb~N/A	HA20457~B43R22C21	15920	51890	110	2698	2525	791	31	46	46	52	45	86	100	100	0	7244	7053	855	12	271	271	269	129	47	100	100	0	0.380	0.366	0.383	0.342	1.491	0.363	0.840	80	565	100	9625	9261	-1.395	2652	6973	2479	6782	201990
12	22	1	AlexaAntiMouseAb~N/A	HA20457~B12R01C22	20420	11690	110	2690	2536	749	29	47	47	48	3	6	100	100	0	9809	8916	1926	21	179	179	222	99	44	100	100	0	0.274	0.285	0.286	0.282	1.698	0.273	0.822	80	621	100	12273	11226	-1.865	2643	9630	2489	8737	202862
42	1	11	AlexaAntiMouseAb~N/A	HA20457~B42R11C01	7410	49740	110	2687	2719	967	35	47	47	81	123	151	100	98	0	10702	10542	684	6	196	196	256	141	55	100	100	0	0.251	0.258	0.247	0.240	1.519	0.250	0.793	80	581	100	13146	13018	-1.993	2640	10506	2672	10346	217553
19	22	1	AlexaAntiMouseAb~N/A	HA20457~B19R01C22	15990	20700	110	2682	2654	1030	38	49	49	57	35	61	100	100	0	9628	9428	1191	12	135	135	198	155	78	100	100	0	0.277	0.280	0.281	0.249	1.679	0.282	0.825	80	602	100	12126	11898	-1.850	2633	9493	2605	9293	212310
17	21	1	AlexaAntiMouseAb~N/A	HA20457~B17R01C21	6710	20750	110	2679	2648	997	37	48	48	76	100	131	100	98	0	10892	9842	2203	22	177	177	204	121	59	100	100	0	0.246	0.269	0.273	0.249	1.692	0.269	0.865	80	612	100	13346	12265	-2.026	2631	10715	2600	9665	211822
13	8	14	Hs~Ref:NM_003636.1~uORF:IOH29625~RFU:49586.12	HA20457~B13R14C08	4150	18870	110	2674	2771	723	26	48	48	50	13	26	100	100	0	2385	2283	442	19	110	110	115	31	26	100	100	0	1.154	1.253	1.196	1.264	1.456	1.297	0.817	80	558	100	4901	4896	0.207	2626	2275	2723	2173	221684
4	1	1	AlexaAntiMouseAb~N/A	HA20457~B04R01C01	16180	2710	110	2671	2597	920	35	46	46	48	18	37	100	100	0	11685	11625	1166	10	116	116	205	135	65	100	100	0	0.227	0.222	0.235	0.200	1.656	0.224	0.808	80	602	100	14194	14060	-2.140	2625	11569	2551	11509	207741
43	11	5	Hs~MGC:NM_138730.1~uORF:IOH9857~RFU:9295.94	HA20457~B43R05C11	13900	48490	110	2661	2843	629	22	212	212	350	386	110	100	100	0	1966	2515	3011	119	382	382	351	196	55	100	100	0	1.546	1.233	1.643	1.485	1.801	0.414	0.207	80	558	100	4033	4764	0.629	2449	1584	2631	2133	227415
40	22	1	AlexaAntiMouseAb~N/A	HA20457~B40R01C22	20580	43200	110	2657	2413	1212	50	46	46	48	20	41	95	95	0	11983	9961	4122	41	143	143	253	196	77	100	97	0	0.221	0.241	0.237	0.205	2.456	0.242	0.871	80	619	100	14451	12185	-2.181	2611	11840	2367	9818	193005
46	2	11	AlexaAntiMouseAb~N/A	HA20457~B46R11C02	7640	54260	110	2652	2585	963	37	47	47	66	136	206	100	98	0	9615	9268	1388	14	236	236	310	230	74	100	100	0	0.278	0.281	0.293	0.259	1.606	0.282	0.849	80	585	100	11984	11570	-1.848	2605	9379	2538	9032	206776
44	16	5	Hs~Ref:NM_016167.3~uORF:IOH40609~RFU:10702.19	HA20457~B44R05C16	19410	48460	110	2650	2468	855	34	46	46	56	71	126	100	100	0	1825	1767	282	15	106	106	109	24	22	100	100	0	1.515	1.458	1.488	1.377	1.736	1.755	0.652	80	577	100	4323	4083	0.599	2604	1719	2422	1661	197458
48	1	11	AlexaAntiMouseAb~N/A	HA20457~B48R11C01	16500	54230	110	2642	2730	765	28	47	47	63	51	80	100	100	0	9460	8596	2247	26	275	275	350	282	80	100	98	0	0.283	0.322	0.325	0.331	1.712	0.296	0.809	80	578	100	11780	11004	-1.824	2595	9185	2683	8321	218378
27	2	18	Hs~MGC:BC022520.1~uORF:IOH10749~RFU:11183.97	HA20457~B27R18C02	12020	33130	110	2641	2797	755	26	48	48	50	22	44	100	100	0	521	525	38	7	102	102	103	11	10	100	100	0	6.189	6.499	5.936	6.303	1.290	7.332	0.831	80	593	100	3012	3172	2.630	2593	419	2749	423	223729
41	22	7	Hs~MGC:BC011739.2~uORF:IOH14463~RFU:11248.14	HA20457~B41R07C22	7130	48980	110	2639	2573	737	28	51	51	121	170	140	100	100	0	1777	1733	234	13	178	178	216	106	49	100	100	0	1.619	1.622	1.650	1.551	1.572	1.770	0.709	80	596	100	4187	4077	0.695	2588	1599	2522	1555	205825
20	15	14	Hs~MGC:BC104469.1~uORF:IOH63631~RFU:15576.42	HA20457~B20R14C15	19060	23280	110	2638	2800	859	30	51	51	166	214	128	100	100	0	1047	1051	112	10	87	87	161	117	72	100	100	0	2.695	2.852	2.716	2.730	1.324	3.192	0.825	80	575	100	3547	3713	1.430	2587	960	2749	964	224001
47	21	1	AlexaAntiMouseAb~N/A	HA20457~B47R01C21	15960	52210	110	2638	2629	1459	55	46	46	52	33	63	98	97	0	11578	10517	3126	29	270	270	350	219	62	100	98	0	0.229	0.252	0.236	0.206	1.860	0.263	0.786	80	616	100	13900	12830	-2.125	2592	11308	2583	10247	210320
6	2	1	AlexaAntiMouseAb~N/A	HA20457~B06R01C02	7340	7250	110	2636	2453	891	36	49	49	74	83	112	98	98	0	11458	11238	1004	8	197	197	235	109	46	100	100	0	0.230	0.218	0.229	0.181	2.766	0.210	0.779	80	599	100	13848	13445	-2.122	2587	11261	2404	11041	196250
27	18	2	Hs~MGC:NM_148179.1~uORF:IOH23094~RFU:6143.97	HA20457~B27R02C18	15230	29930	110	2626	2582	780	30	48	48	54	35	64	100	100	0	626	620	111	17	107	107	113	21	18	100	100	0	4.967	4.940	4.723	4.816	1.389	5.696	0.797	80	548	100	3097	3047	2.312	2578	519	2534	513	206595
4	4	6	Hs~Ref:NM_014508.2~uORF:IOH54737~RFU:11205.24	HA20457~B04R06C04	16780	3710	110	2625	2613	827	31	48	48	59	60	101	100	100	0	1887	1774	281	15	111	111	119	26	21	100	100	0	1.451	1.542	1.484	1.472	1.415	1.680	0.793	80	539	100	4353	4228	0.537	2577	1776	2565	1663	209062
18	21	1	AlexaAntiMouseAb~N/A	HA20457~B18R01C21	11220	20710	110	2624	2609	1038	39	48	48	49	3	6	100	100	0	11011	10124	2466	24	141	141	202	136	67	100	100	0	0.237	0.257	0.265	0.237	1.576	0.259	0.857	80	599	100	13446	12544	-2.077	2576	10870	2561	9983	208690
22	2	1	AlexaAntiMouseAb~N/A	HA20457~B22R01C02	7420	25220	110	2623	2604	1082	41	48	48	58	51	87	98	98	0	10482	9826	2163	22	125	125	186	118	63	100	100	0	0.249	0.263	0.257	0.232	1.736	0.275	0.872	80	607	100	12932	12257	-2.008	2575	10357	2556	9701	208310
26	2	11	AlexaAntiMouseAb~N/A	HA20457~B26R11C02	7520	31780	110	2622	2435	675	27	48	48	48	2	4	100	100	0	9454	8769	1899	21	132	132	134	19	14	100	100	0	0.276	0.276	0.277	0.274	1.427	0.261	0.868	80	585	100	11896	11024	-1.857	2574	9322	2387	8637	194766
33	1	11	AlexaAntiMouseAb~N/A	HA20457~B33R11C01	2850	40750	110	2610	2782	909	32	48	48	55	36	65	100	100	0	9428	8529	2123	24	204	204	257	123	47	100	100	0	0.278	0.328	0.320	0.328	1.549	0.310	0.858	80	596	100	11786	11059	-1.848	2562	9224	2734	8325	222527
48	21	9	Hs~Ref:NM_018454.4~uORF:IOH3087~RFU:5401.75	HA20457~B48R09C21	20500	53820	110	2607	2621	731	27	45	45	50	48	96	100	100	0	1431	1460	237	16	121	121	123	21	17	100	100	0	1.956	1.924	1.863	1.866	1.384	2.116	0.840	80	548	100	3872	3915	0.968	2562	1310	2576	1339	209651
14	21	1	AlexaAntiMouseAb~N/A	HA20457~B14R01C21	11170	16230	110	2603	2631	1155	43	48	48	56	36	64	98	98	0	11131	10154	2461	24	148	148	205	141	68	100	100	0	0.233	0.258	0.240	0.217	2.096	0.268	0.832	80	580	100	13538	12589	-2.104	2555	10983	2583	10006	210489
11	1	11	AlexaAntiMouseAb~N/A	HA20457~B11R11C01	11690	13690	110	2602	2684	759	28	115	115	244	254	104	100	100	0	9259	8848	1437	16	302	302	306	83	27	100	100	0	0.278	0.301	0.298	0.292	1.305	0.285	0.816	80	580	100	11444	11115	-1.849	2487	8957	2569	8546	214681
8	22	1	AlexaAntiMouseAb~N/A	HA20457~B08R01C22	20370	7170	110	2600	2488	1105	44	48	48	66	91	137	98	97	0	10062	9879	936	9	397	397	401	96	23	100	100	0	0.264	0.257	0.266	0.215	2.138	0.255	0.742	80	612	100	12217	11922	-1.921	2552	9665	2440	9482	199033
42	2	11	AlexaAntiMouseAb~N/A	HA20457~B42R11C02	7600	49740	110	2599	2552	850	33	46	46	47	7	14	100	100	0	10655	10111	1648	16	174	174	244	123	50	100	100	0	0.244	0.252	0.246	0.231	1.621	0.255	0.884	80	536	100	13034	12443	-2.038	2553	10481	2506	9937	204128
18	17	4	Hs~MGC:BC030290.1~uORF:IOH21571~RFU:7584.06	HA20457~B18R04C17	10420	21310	110	2594	2663	853	32	49	49	51	22	43	100	100	0	1225	1207	144	11	94	94	94	9	9	100	100	0	2.250	2.349	2.275	2.248	1.420	2.683	0.763	80	548	100	3676	3727	1.170	2545	1131	2614	1113	213015
34	5	18	Hs~MGC:NM_173195.2~uORF:IOH29635~RFU:19019.72	HA20457~B34R18C05	8120	42150	110	2592	2654	712	26	984	984	1448	1207	83	68	21	0	221	255	166	65	189	189	206	203	98	5	3	0	50.250	25.303	47.979	41.468	2.900	51.408	0.042	80	512	100	1640	1736	5.651	1608	32	1670	66	212349
4	7	16	Hs~Ref:NM_003418.1~uORF:IOH59002~RFU:12822.05	HA20457~B04R16C07	17390	5700	110	2590	2686	1408	52	47	47	51	47	92	100	98	0	441	409	100	24	101	101	104	21	20	95	93	0	7.479	8.568	8.176	8.626	2.436	10.578	0.753	80	577	100	2883	2947	2.903	2543	340	2639	308	214890
6	7	3	Hs~MGC:NM_015191.1~uORF:IOH45349~RFU:6252.18	HA20457~B06R03C07	8390	7660	110	2590	2536	901	35	47	47	53	51	96	100	100	0	396	380	45	11	131	131	137	40	29	100	100	0	9.596	9.996	10.027	9.385	1.493	11.577	0.693	80	567	100	2808	2738	3.262	2543	265	2489	249	202888
46	11	18	Hs~Ref:NM_024578.1~uORF:IOH23128~RFU:23426.86	HA20457~B46R18C11	9450	55650	110	2589	2731	1173	42	47	47	61	124	203	100	100	0	1254	2846	4128	145	202	202	280	481	171	100	56	0	2.416	1.015	2.364	1.635	3.411	0.099	0.018	80	555	100	3594	5328	1.273	2542	1052	2684	2644	218453
18	18	4	Hs~MGC:BC030290.1~uORF:IOH21571~RFU:7569.87	HA20457~B18R04C18	10620	21310	110	2586	2759	935	33	48	48	49	18	36	100	100	0	1333	1316	153	11	97	97	101	21	20	100	100	0	2.053	2.224	2.079	2.125	1.459	2.778	0.708	80	568	100	3774	3930	1.038	2538	1236	2711	1219	220759
45	16	17	Hs~Ref:NM_013242.1~uORF:IOH5166~RFU:29448.47	HA20457~B45R17C16	5890	55440	110	2586	2449	789	32	51	51	122	141	115	100	100	0	1462	1464	200	13	259	259	268	85	31	100	100	0	2.107	1.990	1.939	1.876	1.553	2.227	0.718	80	589	100	3738	3603	1.075	2535	1203	2398	1205	195916
45	15	17	Hs~Ref:NM_013242.1~uORF:IOH5166~RFU:33618.86	HA20457~B45R17C15	5700	55440	110	2585	2774	919	33	48	48	114	138	121	100	100	0	1603	1603	382	23	254	254	295	117	39	100	100	0	1.881	2.021	2.204	1.966	1.412	2.430	0.708	80	574	100	3886	4075	0.911	2537	1349	2726	1349	221929
24	21	1	AlexaAntiMouseAb~N/A	HA20457~B24R01C21	20270	25200	110	2585	2583	1353	52	48	48	49	10	20	98	97	0	10487	9515	3011	31	182	182	228	129	56	100	100	0	0.246	0.272	0.256	0.199	2.992	0.274	0.804	80	579	100	12842	11868	-2.022	2537	10305	2535	9333	206614
41	1	1	AlexaAntiMouseAb~N/A	HA20457~B41R01C01	2920	47760	110	2584	2558	888	34	47	47	60	64	106	100	100	0	10661	10122	1763	17	194	194	318	262	82	100	100	0	0.242	0.253	0.243	0.237	1.763	0.243	0.773	80	618	100	13004	12439	-2.045	2537	10467	2511	9928	204620
27	21	1	AlexaAntiMouseAb~N/A	HA20457~B27R01C21	15830	29700	110	2583	2732	1651	60	48	48	81	123	151	95	92	0	10358	8257	3834	46	138	138	219	158	72	100	100	0	0.248	0.331	0.314	0.293	2.615	0.330	0.728	80	608	100	12755	10803	-2.011	2535	10220	2684	8119	218570
10	1	11	AlexaAntiMouseAb~N/A	HA20457~B10R11C01	7180	13740	110	2583	2513	607	24	47	47	51	20	39	100	100	0	9078	8773	1394	15	148	148	175	81	46	100	100	0	0.284	0.286	0.283	0.284	1.482	0.271	0.847	80	590	100	11466	11091	-1.816	2536	8930	2466	8625	201054
14	1	1	AlexaAntiMouseAb~N/A	HA20457~B14R01C01	7160	16230	110	2577	2089	1081	51	48	48	95	157	165	97	91	0	10253	9049	2865	31	123	123	208	159	76	100	100	0	0.250	0.229	0.245	0.193	1.977	0.230	0.749	80	616	100	12659	10967	-2.002	2529	10130	2041	8926	167086
25	1	3	Hs~MGC:BC030516.1~uORF:IOH21650~RFU:47268.42	HA20457~B25R03C01	2780	30160	110	2573	2617	737	28	48	48	72	113	156	100	100	0	2123	2106	121	5	128	128	169	161	95	100	100	0	1.266	1.299	1.254	1.247	1.356	1.303	0.717	80	601	100	4520	4547	0.340	2525	1995	2569	1978	209391
44	1	11	AlexaAntiMouseAb~N/A	HA20457~B44R11C01	16430	49680	110	2562	2638	758	28	48	48	56	37	66	100	100	0	9717	9567	1194	12	320	320	325	119	36	100	100	0	0.268	0.280	0.288	0.268	1.404	0.275	0.857	80	590	100	11911	11837	-1.902	2514	9397	2590	9247	211043
40	20	18	Hs~Ref:NM_032860.2~uORF:IOH22948~RFU:6684.34	HA20457~B40R18C20	20200	46640	110	2544	2357	939	39	46	46	54	73	135	100	100	0	1320	1286	211	16	113	113	116	20	17	100	100	0	2.070	1.970	2.043	1.817	1.627	2.413	0.729	80	549	100	3705	3484	1.049	2498	1207	2311	1173	188575
24	1	11	AlexaAntiMouseAb~N/A	HA20457~B24R11C01	16280	27220	110	2542	2553	809	31	48	48	49	5	10	100	100	0	9245	8769	1595	18	132	132	220	152	69	100	100	0	0.274	0.290	0.286	0.269	1.545	0.296	0.902	80	570	100	11607	11142	-1.869	2494	9113	2505	8637	204231
20	12	14	Hs~MGC:BC009458.1~uORF:IOH13468~RFU:37720.42	HA20457~B20R14C12	18450	23290	110	2540	2551	616	24	51	51	119	217	182	100	100	0	1138	1154	103	8	102	102	134	93	69	100	100	0	2.403	2.376	2.420	2.310	1.319	2.735	0.744	80	546	100	3525	3552	1.265	2489	1036	2500	1052	204115
7	1	11	AlexaAntiMouseAb~N/A	HA20457~B07R11C01	11720	9240	110	2533	2420	872	36	47	47	49	27	55	98	98	0	10640	10325	1419	13	109	109	165	111	67	100	100	0	0.236	0.232	0.233	0.200	2.293	0.229	0.810	80	547	100	13017	12589	-2.083	2486	10531	2373	10216	193614
46	21	22	AlexaAntiMouseAb~N/A	HA20457~B46R22C21	11440	56440	110	2523	2156	1036	48	47	47	62	66	106	100	95	0	7041	6455	1766	27	201	201	215	52	24	100	100	0	0.362	0.337	0.358	0.277	2.090	0.347	0.845	80	570	100	9316	8363	-1.466	2476	6840	2109	6254	172498
16	19	14	Hs~MGC:BC002559.1~uORF:IOH4053~RFU:19474.89	HA20457~B16R14C19	19880	18810	110	2520	2624	694	26	56	56	125	175	140	100	100	0	1647	1626	122	7	183	183	202	260	128	100	100	0	1.683	1.780	1.666	1.715	1.347	2.019	0.630	80	576	100	3928	4011	0.751	2464	1464	2568	1443	209942
19	1	1	AlexaAntiMouseAb~N/A	HA20457~B19R01C01	11770	20710	110	2518	2621	1008	38	48	48	57	75	131	98	97	0	10803	10036	2187	21	99	99	222	210	94	100	100	0	0.231	0.259	0.242	0.230	1.676	0.259	0.824	80	628	100	13174	12510	-2.116	2470	10704	2573	9937	209651
2	21	1	AlexaAntiMouseAb~N/A	HA20457~B02R01C21	11140	2760	110	2513	2377	1137	47	47	47	48	11	22	97	97	0	12400	11735	2172	18	120	120	169	93	55	100	100	0	0.201	0.201	0.205	0.152	3.264	0.199	0.768	80	598	100	14746	13945	-2.316	2466	12280	2330	11615	190165
2	22	1	AlexaAntiMouseAb~N/A	HA20457~B02R01C22	11350	2760	110	2513	2353	732	31	47	47	48	7	14	100	100	0	12483	11969	1599	13	163	163	179	93	51	100	100	0	0.200	0.195	0.208	0.183	1.585	0.186	0.825	80	620	100	14786	14112	-2.321	2466	12320	2306	11806	188279
9	19	16	Hs~Ref:NM_139168.1~uORF:IOH37855~RFU:5036.03	HA20457~B09R16C19	6330	14720	110	2503	3001	1305	43	52	52	293	758	258	100	97	0	1228	1934	3047	157	93	93	127	83	65	100	98	0	2.159	1.602	2.091	2.140	2.502	0.724	0.095	80	568	100	3586	4790	1.111	2451	1135	2949	1841	240050
2	2	1	AlexaAntiMouseAb~N/A	HA20457~B02R01C02	7350	2780	110	2503	2132	949	44	47	47	60	114	190	98	95	0	12040	10354	3491	33	129	129	177	107	60	100	100	0	0.206	0.204	0.224	0.193	2.099	0.191	0.778	80	590	100	14367	12310	-2.278	2456	11911	2085	10225	170531
14	22	1	AlexaAntiMouseAb~N/A	HA20457~B14R01C22	11360	16230	110	2501	2173	1421	65	48	48	53	39	73	90	86	0	10976	8890	4035	45	116	116	196	155	79	100	100	0	0.226	0.242	0.229	0.145	3.107	0.262	0.835	80	580	100	13313	10899	-2.146	2453	10860	2125	8774	173815
17	2	1	AlexaAntiMouseAb~N/A	HA20457~B17R01C02	2910	20770	110	2495	2496	791	31	49	49	72	63	87	100	100	0	9948	9411	1473	15	170	170	206	112	54	100	100	0	0.250	0.265	0.259	0.247	1.486	0.259	0.815	80	577	100	12224	11688	-1.999	2446	9778	2447	9241	199654
35	2	11	AlexaAntiMouseAb~N/A	HA20457~B35R11C02	12040	40710	110	2493	2411	734	30	47	47	52	23	44	97	97	0	9619	8957	2082	23	121	121	189	116	61	100	100	0	0.258	0.268	0.265	0.244	1.863	0.261	0.865	80	566	100	11944	11200	-1.957	2446	9498	2364	8836	192883
16	2	11	AlexaAntiMouseAb~N/A	HA20457~B16R11C02	16480	18220	110	2492	2498	933	37	48	48	49	9	18	100	100	0	8297	7882	1183	15	91	91	141	86	60	100	100	0	0.298	0.314	0.311	0.292	1.538	0.307	0.814	80	557	100	10650	10241	-1.747	2444	8206	2450	7791	199803
25	22	1	AlexaAntiMouseAb~N/A	HA20457~B25R01C22	6990	29740	110	2484	2590	877	33	47	47	47	2	4	100	100	0	10239	9429	2332	24	138	138	143	39	27	100	100	0	0.241	0.274	0.254	0.275	1.754	0.249	0.766	80	613	100	12538	11834	-2.051	2437	10101	2543	9291	207200
45	7	16	Hs~MGC:BC048970.1~uORF:IOH26893~RFU:10684.5	HA20457~B45R16C07	4100	55250	110	2480	2535	826	32	47	47	56	46	82	100	100	0	2535	2446	252	10	179	179	182	24	13	100	100	0	1.033	1.097	1.064	1.042	1.340	1.147	0.823	80	576	100	4789	4755	0.046	2433	2356	2488	2267	202828
46	1	11	AlexaAntiMouseAb~N/A	HA20457~B46R11C01	7420	54250	110	2478	2138	1360	63	46	46	74	178	240	80	80	0	9883	7925	3690	46	182	182	300	425	141	90	86	0	0.251	0.270	0.274	0.148	4.788	0.281	0.880	80	593	100	12133	9835	-1.996	2432	9701	2092	7743	171049
40	12	5	Hs~Ref:NM_003600.1~N/A~RFU:18103.71	HA20457~B40R05C12	18590	44010	110	2476	2483	686	27	47	47	88	165	187	100	100	0	2519	2476	274	11	111	111	134	94	70	100	100	0	1.009	1.030	0.999	0.996	1.359	1.143	0.775	80	537	100	4837	4801	0.013	2429	2408	2436	2365	198650
47	3	10	Hs~Ref:NM_144676.1~uORF:IOH13348~RFU:1.86	HA20457~B47R10C03	12380	54010	110	2472	2315	2035	87	49	49	2046	3706	181	25	0	0	248	259	98	37	191	191	246	171	69	12	5	0	42.509	33.324	25.684	7.661	15.041	43.271	0.512	80	582	100	2480	2334	5.410	2423	57	2266	68	185182
5	2	11	AlexaAntiMouseAb~N/A	HA20457~B05R11C02	2880	9280	110	2470	2498	820	32	46	46	46	4	8	100	100	0	9349	9005	1246	13	106	106	121	41	33	100	100	0	0.262	0.276	0.268	0.259	1.534	0.265	0.799	80	548	100	11667	11351	-1.931	2424	9243	2452	8899	199825
4	1	8	Hs~MGC:BC044632.1~uORF:IOH62971~RFU:23382.1	HA20457~B04R08C01	16200	4110	110	2470	2415	614	25	51	51	159	228	143	100	100	0	932	933	131	14	181	181	235	160	68	100	100	0	3.221	3.144	3.440	3.074	1.449	3.426	0.685	80	560	100	3170	3116	1.688	2419	751	2364	752	193177
12	7	21	Hs~Ref:NM_207285.1~uORF:IOH50066~RFU:37272.14	HA20457~B12R21C07	17430	15710	110	2466	2313	676	29	134	134	217	246	113	100	98	0	2147	2078	314	15	308	308	336	183	54	100	98	0	1.268	1.231	1.244	1.186	1.396	1.327	0.760	80	568	100	4171	3949	0.343	2332	1839	2179	1770	185020
20	2	11	AlexaAntiMouseAb~N/A	HA20457~B20R11C02	16440	22690	110	2449	2188	1051	48	48	48	57	54	94	95	88	0	8871	8533	1503	17	115	115	137	65	47	100	100	0	0.274	0.254	0.279	0.176	3.582	0.267	0.797	80	558	100	11157	10558	-1.867	2401	8756	2140	8418	175012
4	2	11	AlexaAntiMouseAb~N/A	HA20457~B04R11C02	16390	4710	110	2446	2347	760	32	48	48	56	39	69	100	100	0	9819	9009	2010	22	129	129	159	84	52	100	100	0	0.247	0.259	0.273	0.256	1.814	0.230	0.735	80	558	100	12088	11179	-2.015	2398	9690	2299	8880	187793
19	2	11	AlexaAntiMouseAb~N/A	HA20457~B19R11C02	11980	22720	110	2445	2362	921	38	48	48	54	46	85	100	100	0	9491	9452	652	6	104	104	153	88	57	100	100	0	0.255	0.248	0.258	0.217	1.782	0.250	0.778	80	559	100	11784	11662	-1.969	2397	9387	2314	9348	188969
40	13	9	Hs~Ref:NM_003690.3~uORF:IOH57108~RFU:30408.3	HA20457~B40R09C13	18790	44820	110	2443	2430	693	28	47	47	54	59	109	100	100	0	1292	1290	82	6	112	112	119	38	31	100	100	0	2.031	2.023	2.089	1.933	1.368	2.223	0.766	80	575	100	3576	3561	1.022	2396	1180	2383	1178	194401
27	20	8	Hs~MGC:BC033856.1~uORF:IOH21797~RFU:32618.12	HA20457~B27R08C20	15620	31120	110	2440	2594	595	22	50	50	114	192	168	100	100	0	1984	1994	632	31	107	107	130	46	35	100	100	0	1.273	1.348	1.317	1.352	1.343	1.298	0.691	80	557	100	4267	4431	0.349	2390	1877	2544	1887	207506
8	2	11	AlexaAntiMouseAb~N/A	HA20457~B08R11C02	16380	9190	110	2439	2328	850	36	48	48	94	170	180	100	100	0	9151	8530	1704	19	167	167	219	196	89	100	100	0	0.266	0.273	0.282	0.257	1.490	0.263	0.797	80	567	100	11375	10643	-1.910	2391	8984	2280	8363	186232
4	2	1	AlexaAntiMouseAb~N/A	HA20457~B04R01C02	16380	2700	110	2424	2507	801	31	48	48	74	91	122	100	100	0	11229	10787	1725	15	139	139	229	172	75	100	100	0	0.214	0.231	0.217	0.218	1.481	0.211	0.780	80	606	100	13466	13107	-2.223	2376	11090	2459	10648	200576
9	21	17	Hs~MGC:BC035006.2~uORF:IOH27161~RFU:3134.28	HA20457~B09R17C21	6730	14930	110	2422	2634	985	37	47	47	81	123	151	100	100	0	540	532	53	9	92	92	99	26	26	100	100	0	5.301	5.880	5.285	5.546	1.407	7.231	0.759	80	577	100	2823	3027	2.406	2375	448	2587	440	210730
18	1	11	AlexaAntiMouseAb~N/A	HA20457~B18R11C01	7240	22730	110	2422	2537	922	36	47	47	47	4	8	100	100	0	8748	8230	1446	17	110	110	118	32	27	100	100	0	0.275	0.307	0.300	0.283	1.636	0.304	0.827	80	606	100	11013	10610	-1.863	2375	8638	2490	8120	202958
43	3	15	Hs~Ref:NM_018189.2~uORF:IOH45471~RFU:10341.7	HA20457~B43R15C03	12310	50500	110	2413	2436	530	21	49	49	298	437	146	100	100	0	1351	1340	105	7	174	174	289	181	62	100	100	0	2.008	2.047	1.957	2.009	1.267	2.160	0.872	80	566	100	3541	3553	1.006	2364	1177	2387	1166	194915
6	19	13	Hs~MGC:BC020597.1~uORF:IOH14197~RFU:35985.81	HA20457~B06R13C19	10780	9640	110	2411	2397	619	25	48	48	136	235	172	100	100	0	1542	1547	79	5	108	108	230	265	115	100	100	0	1.648	1.632	1.672	1.567	1.372	1.828	0.764	80	566	100	3797	3788	0.721	2363	1434	2349	1439	191741
9	17	19	Hs~MGC:NM_175887.2~uORF:IOH27336~RFU:16487.99	HA20457~B09R19C17	5930	15340	110	2404	2319	608	26	49	49	185	361	195	100	97	0	3010	3004	170	5	96	96	252	424	168	100	100	0	0.808	0.781	0.775	0.749	1.361	0.809	0.797	80	544	100	5269	5178	-0.307	2355	2914	2270	2908	185495
10	2	1	AlexaAntiMouseAb~N/A	HA20457~B10R01C02	7370	11730	110	2403	2322	975	41	49	49	109	134	122	100	100	0	10183	9153	2311	25	260	260	258	115	44	100	100	0	0.237	0.256	0.243	0.240	1.534	0.243	0.768	80	590	100	12277	11166	-2.076	2354	9923	2273	8893	185794
5	6	16	Hs~N/A:NM_006206.3~CAT:PV4680~RFU:4637.55	HA20457~B05R16C06	3690	10280	110	2398	2344	1036	44	47	47	47	9	19	100	100	0	396	391	65	16	87	87	89	15	16	100	100	0	7.608	7.556	7.489	6.742	1.598	8.930	0.794	80	568	100	2660	2601	2.928	2351	309	2297	304	187512
28	22	1	AlexaAntiMouseAb~N/A	HA20457~B28R01C22	20510	29670	110	2397	2257	984	43	48	48	51	32	62	98	98	0	9326	8674	1682	19	100	100	152	98	64	100	100	0	0.255	0.258	0.263	0.235	1.638	0.261	0.817	80	612	100	11575	10783	-1.974	2349	9226	2209	8574	180522
20	11	14	Hs~MGC:BC009458.1~uORF:IOH13468~RFU:36716.16	HA20457~B20R14C11	18250	23290	110	2380	2402	597	24	50	50	110	133	120	100	100	0	1170	1148	124	10	149	149	152	93	61	100	100	0	2.282	2.354	2.290	2.300	1.323	2.493	0.733	80	545	100	3351	3351	1.190	2330	1021	2352	999	192161
12	1	11	AlexaAntiMouseAb~N/A	HA20457~B12R11C01	16220	13710	110	2379	2323	975	41	47	47	47	5	10	100	100	0	8863	8741	900	10	112	112	177	114	64	100	100	0	0.266	0.264	0.263	0.213	2.516	0.264	0.734	80	608	100	11083	10905	-1.908	2332	8751	2276	8629	185874
34	21	13	Hs~Ref:NM_031445.1~uORF:IOH5185~RFU:22770.65	HA20457~B34R13C21	11320	41140	110	2377	2506	778	31	172	172	270	286	105	100	100	0	1373	1474	429	29	586	586	526	379	72	98	55	0	2.802	2.628	2.737	2.713	1.746	2.782	0.435	80	505	100	2992	3222	1.486	2205	787	2334	888	200463
34	1	11	AlexaAntiMouseAb~N/A	HA20457~B34R11C01	7310	40750	110	2377	2270	1397	61	47	47	53	68	128	91	91	0	9773	8334	3217	38	170	170	257	134	52	100	100	0	0.243	0.272	0.241	0.180	3.006	0.295	0.828	80	590	100	11933	10387	-2.043	2330	9603	2223	8164	181608
23	22	22	AlexaAntiMouseAb~N/A	HA20457~B23R22C22	15970	29430	110	2376	2286	661	28	48	48	81	127	156	100	100	0	6534	6002	1322	22	107	107	219	205	93	100	100	0	0.362	0.380	0.379	0.377	1.328	0.368	0.878	80	621	100	8755	8133	-1.465	2328	6427	2238	5895	182843
5	1	11	AlexaAntiMouseAb~N/A	HA20457~B05R11C01	2680	9280	110	2372	2256	631	27	47	47	47	3	6	100	100	0	9080	8938	787	8	114	114	131	52	39	100	100	0	0.259	0.250	0.252	0.240	1.341	0.242	0.791	80	589	100	11291	11033	-1.947	2325	8966	2209	8824	180509
28	13	4	Hs~MGC:BC010537.1~uORF:IOH10170~RFU:45021.39	HA20457~B28R04C13	18690	30280	110	2369	2194	632	28	236	236	404	455	112	96	93	0	2039	1842	489	26	201	201	207	120	57	100	96	0	1.161	1.193	1.166	1.212	1.779	1.281	0.584	80	541	100	3971	3599	0.215	2133	1838	1958	1641	175510
11	5	13	Hs~MGC:BC007346.2~uORF:IOH7023~RFU:54758.73	HA20457~B11R13C05	12490	14090	110	2366	2322	481	20	52	52	199	255	128	100	100	0	781	805	90	11	119	119	223	166	74	100	100	0	3.495	3.309	3.408	3.256	1.260	3.782	0.699	80	548	100	2976	2956	1.805	2314	662	2270	686	185779
48	2	16	Hs~Ref:NM_005409.3~CAT_PHC1695~RFU:9396.39	HA20457~B48R16C02	16700	55230	110	2361	2555	570	22	48	48	162	194	119	100	100	0	1535	1599	236	14	158	158	209	106	50	100	100	0	1.680	1.740	1.611	1.713	1.364	1.708	0.758	80	577	100	3690	3948	0.748	2313	1377	2507	1441	204380
34	6	13	Hs~Ref:NM_003994.4~uORF:IOH44526~RFU:6478.17	HA20457~B34R13C06	8320	41150	110	2361	2335	665	28	48	48	56	42	75	100	100	0	728	703	89	12	126	126	127	13	10	100	100	0	3.842	3.964	3.980	3.842	1.374	4.523	0.849	80	556	100	2915	2864	1.942	2313	602	2287	577	186825
13	7	14	Hs~Ref:NM_003636.1~uORF:IOH29625~RFU:52394.9	HA20457~B13R14C07	3950	18870	110	2359	2637	1027	38	47	47	49	12	24	100	100	0	2367	2336	305	13	110	110	121	30	24	100	100	0	1.024	1.164	1.045	1.105	1.455	1.333	0.724	80	558	100	4569	4816	0.035	2312	2257	2590	2226	210973
12	8	21	Hs~Ref:NM_207285.1~uORF:IOH50066~RFU:34810.27	HA20457~B12R21C08	17630	15710	110	2352	2310	588	25	116	116	224	271	120	100	100	0	1878	1855	192	10	308	308	299	174	58	100	100	0	1.424	1.418	1.432	1.371	1.290	1.602	0.794	80	576	100	3806	3741	0.510	2236	1570	2194	1547	184837
13	1	1	AlexaAntiMouseAb~N/A	HA20457~B13R01C01	2730	16260	110	2349	2292	900	39	48	48	70	80	114	100	96	0	10276	9517	2215	23	123	123	205	171	83	100	100	0	0.227	0.239	0.235	0.212	1.698	0.236	0.858	80	620	100	12454	11638	-2.142	2301	10153	2244	9394	183359
6	8	3	Hs~MGC:NM_015191.1~uORF:IOH45349~RFU:5219.43	HA20457~B06R03C08	8570	7650	110	2348	2499	941	37	46	46	50	38	76	100	100	0	406	385	55	14	125	125	127	11	8	100	100	0	8.192	9.435	9.437	9.046	1.631	11.821	0.670	80	564	100	2583	2713	3.034	2302	281	2453	260	199941
14	1	11	AlexaAntiMouseAb~N/A	HA20457~B14R11C01	7190	18240	110	2345	2353	779	33	54	54	141	162	114	100	100	0	8456	7962	1584	19	273	273	265	105	39	100	100	0	0.280	0.299	0.286	0.294	1.608	0.272	0.797	80	579	100	10474	9988	-1.837	2291	8183	2299	7689	188216
22	22	22	AlexaAntiMouseAb~N/A	HA20457~B22R22C22	11450	29410	110	2343	2059	876	42	48	48	48	2	4	100	100	0	6677	6203	1464	23	98	98	116	50	43	100	100	0	0.349	0.329	0.346	0.294	1.727	0.336	0.824	80	612	100	8874	8116	-1.519	2295	6579	2011	6105	164690
13	22	1	AlexaAntiMouseAb~N/A	HA20457~B13R01C22	6940	16260	110	2338	2317	823	35	47	47	48	6	12	100	100	0	9686	9053	1942	21	147	147	201	111	55	100	100	0	0.240	0.255	0.260	0.240	1.935	0.232	0.725	80	598	100	11830	11176	-2.058	2291	9539	2270	8906	185391
41	1	16	Hs~Ref:NM_004443.2~CAT:PV3658~RFU:12560.45	HA20457~B41R16C01	2940	50790	110	2335	2554	1245	48	46	46	47	15	31	100	100	0	376	350	63	18	193	193	206	40	19	92	85	0	12.508	15.975	15.290	15.450	1.655	18.518	0.724	80	590	100	2472	2665	3.645	2289	183	2508	157	204293
29	21	9	Hs~MGC:BC019039.2~uORF:IOH46089~RFU:48962.05	HA20457~B29R09C21	6860	35830	110	2332	2290	679	29	86	86	287	340	118	100	100	0	1822	1890	301	15	339	339	347	235	67	100	100	0	1.514	1.421	1.469	1.372	1.491	1.514	0.653	80	567	100	3729	3755	0.599	2246	1483	2204	1551	183205
2	5	16	Hs~Ref:NM_199168.2~CAT_PHC1346~RFU:1152.84	HA20457~B02R16C05	7960	5780	110	2329	2417	604	24	48	48	69	104	150	100	100	0	940	931	54	5	140	140	153	35	22	100	100	0	2.851	2.995	2.784	2.909	1.295	3.583	0.762	80	575	100	3081	3160	1.512	2281	800	2369	791	193337
9	2	11	AlexaAntiMouseAb~N/A	HA20457~B09R11C02	2910	13730	110	2320	2058	792	38	50	50	156	212	135	100	96	0	8284	7869	1550	19	286	286	303	140	46	100	100	0	0.284	0.265	0.286	0.241	1.634	0.258	0.808	80	568	100	10268	9591	-1.817	2270	7998	2008	7583	164634
45	2	1	AlexaAntiMouseAb~N/A	HA20457~B45R01C02	3070	52250	110	2319	2262	792	35	47	47	66	66	100	97	97	0	10715	9871	2513	25	294	294	397	212	53	100	100	0	0.218	0.231	0.237	0.203	2.263	0.229	0.884	80	598	100	12693	11792	-2.197	2272	10421	2215	9577	180979
33	21	14	Hs~Ref:NM_134427.1~uORF:IOH45474~RFU:47977.07	HA20457~B33R14C21	6850	41320	110	2319	2245	400	17	133	133	230	233	101	100	100	0	1253	1254	111	8	484	484	406	209	51	100	100	0	2.843	2.743	2.931	2.715	1.314	2.488	0.742	80	577	100	2955	2882	1.507	2186	769	2112	770	179598
4	3	6	Hs~Ref:NM_014508.2~uORF:IOH54737~RFU:12010.92	HA20457~B04R06C03	16590	3710	110	2314	2252	489	21	48	48	54	30	55	100	100	0	1881	1826	358	19	109	109	113	20	17	100	100	0	1.279	1.284	1.295	1.279	1.308	1.322	0.820	80	589	100	4038	3921	0.355	2266	1772	2204	1717	180121
27	3	19	Hs~MGC:BC064840.1~uORF:IOH40500~RFU:28752.79	HA20457~B27R19C03	12240	33340	110	2304	2343	608	25	48	48	54	34	62	100	100	0	725	733	56	7	101	101	110	25	22	100	100	0	3.615	3.631	3.546	3.524	1.272	4.087	0.787	80	574	100	2880	2927	1.854	2256	624	2295	632	187458
14	5	9	Hs~Ref:NM_003135.1~uORF:IOH59899~RFU:8628.82	HA20457~B14R09C05	7980	17840	110	2293	2231	449	20	52	52	333	475	142	100	100	0	2551	2521	188	7	120	120	194	114	58	100	100	0	0.922	0.908	0.917	0.890	1.227	0.886	0.671	80	567	100	4672	4580	-0.117	2241	2431	2179	2401	178505
24	22	1	AlexaAntiMouseAb~N/A	HA20457~B24R01C22	20460	25190	110	2293	1989	1067	53	48	48	49	10	20	96	96	0	9430	8428	2362	28	105	105	144	104	72	100	100	0	0.241	0.233	0.242	0.156	3.351	0.245	0.806	80	611	100	11570	10264	-2.054	2245	9325	1941	8323	159080
33	22	20	Hs~Ref:NM_016359.2~uORF:IOH45439~RFU:14274.02	HA20457~B33R20C22	7050	42520	110	2290	2364	623	26	47	47	52	40	76	100	100	0	2096	2101	123	5	131	131	133	14	10	100	100	0	1.141	1.176	1.144	1.137	1.306	1.279	0.832	80	590	100	4208	4287	0.191	2243	1965	2317	1970	189144
6	2	11	AlexaAntiMouseAb~N/A	HA20457~B06R11C02	7380	9250	110	2287	2232	730	32	48	48	79	157	198	98	98	0	9300	9113	853	9	219	219	206	93	45	100	100	0	0.247	0.246	0.241	0.228	1.593	0.248	0.853	80	538	100	11320	11078	-2.020	2239	9081	2184	8894	178572
3	22	1	AlexaAntiMouseAb~N/A	HA20457~B03R01C22	15840	2720	110	2286	2239	549	24	46	46	46	3	6	100	100	0	11714	10814	2129	19	113	113	161	101	62	100	100	0	0.193	0.205	0.196	0.206	1.422	0.198	0.899	80	591	100	13841	12894	-2.373	2240	11601	2193	10701	179159
18	2	11	AlexaAntiMouseAb~N/A	HA20457~B18R11C02	7440	22720	110	2283	2231	729	32	47	47	47	2	4	100	100	0	8281	7837	1330	16	108	108	112	20	17	100	100	0	0.274	0.283	0.289	0.271	1.524	0.272	0.837	80	559	100	10409	9913	-1.870	2236	8173	2184	7729	178479
16	22	1	AlexaAntiMouseAb~N/A	HA20457~B16R01C22	20450	16210	110	2283	2193	998	45	48	48	51	26	50	100	100	0	9251	8766	1699	19	158	158	211	115	54	100	100	0	0.246	0.249	0.243	0.211	1.906	0.253	0.788	80	602	100	11328	10753	-2.024	2235	9093	2145	8608	175419
47	3	1	ERa~N/A	HA20457~B47R01C03	12360	52240	110	2282	2512	846	33	48	48	121	157	129	100	100	0	1102	1104	76	6	192	192	208	67	32	100	100	0	2.455	2.702	2.509	2.567	1.327	2.986	0.778	80	554	100	3144	3376	1.296	2234	910	2464	912	200986
44	15	5	Hs~Ref:NM_016167.3~uORF:IOH40609~RFU:9299.67	HA20457~B44R05C15	19210	48470	110	2280	2353	875	37	46	46	48	16	33	100	100	0	1412	1392	132	9	108	108	108	11	10	100	100	0	1.713	1.797	1.702	1.672	1.521	2.155	0.739	80	557	100	3538	3591	0.777	2234	1304	2307	1284	188269
6	12	5	Hs~Ref:NM_007194.2~N/A~RFU:18450.87	HA20457~B06R05C12	9390	8030	110	2278	2287	641	28	48	48	191	709	371	100	92	0	461	461	53	11	116	116	138	69	50	100	100	0	6.464	6.490	6.034	6.306	1.343	7.510	0.734	80	567	100	2575	2584	2.692	2230	345	2239	345	182992
45	1	11	AlexaAntiMouseAb~N/A	HA20457~B45R11C01	2890	54250	110	2272	2102	790	37	46	46	47	10	21	100	100	0	10402	9401	2151	22	210	210	330	214	64	100	100	0	0.218	0.224	0.237	0.206	1.642	0.225	0.868	80	588	100	12418	11247	-2.195	2226	10192	2056	9191	168122
8	21	1	AlexaAntiMouseAb~N/A	HA20457~B08R01C21	20170	7160	110	2271	2339	778	33	49	49	88	120	136	100	100	0	10151	9807	1409	14	213	213	246	120	48	100	100	0	0.224	0.239	0.234	0.229	1.368	0.221	0.775	80	599	100	12160	11884	-2.161	2222	9938	2290	9594	187117
41	1	11	AlexaAntiMouseAb~N/A	HA20457~B41R11C01	2940	49790	110	2270	2233	953	42	48	48	77	100	129	100	100	0	9640	9105	1596	17	382	382	419	148	35	100	100	0	0.240	0.250	0.250	0.230	1.569	0.250	0.808	80	570	100	11480	10908	-2.059	2222	9258	2185	8723	178661
46	6	12	Hs~Ref:NM_015933.1~uORF:IOH3769~RFU:7120.54	HA20457~B46R12C06	8410	54440	110	2261	2039	773	37	472	472	636	695	109	83	72	0	2351	3757	4383	116	702	702	612	412	67	93	91	0	1.085	0.513	0.966	0.685	2.483	0.192	0.164	80	598	100	3438	4622	0.118	1789	1649	1567	3055	163148
28	21	1	AlexaAntiMouseAb~N/A	HA20457~B28R01C21	20310	29660	110	2258	2193	1074	48	48	48	49	10	20	96	96	0	9488	8133	3072	37	196	196	210	93	44	100	100	0	0.238	0.270	0.261	0.225	2.699	0.263	0.796	80	598	100	11502	10082	-2.072	2210	9292	2145	7937	175455
38	1	12	Hs~Ref:NM_001023.2~uORF:IOH6083~RFU:11534.93	HA20457~B38R12C01	7350	45450	110	2257	2202	521	23	160	160	272	274	100	100	100	0	2568	2555	89	3	441	441	445	119	26	100	100	0	0.986	0.966	1.010	0.934	1.309	0.912	0.742	80	590	100	4224	4156	-0.020	2097	2127	2042	2114	176136
36	21	1	AlexaAntiMouseAb~N/A	HA20457~B36R01C21	20400	38670	110	2257	2092	1090	52	48	48	90	137	152	96	90	0	10995	10095	2850	28	90	90	152	150	98	100	100	0	0.203	0.204	0.198	0.156	2.407	0.210	0.835	80	590	100	13114	12049	-2.304	2209	10905	2044	10005	167378
23	22	1	AlexaAntiMouseAb~N/A	HA20457~B23R01C22	15920	25240	110	2249	2158	2019	93	49	49	134	425	317	58	58	0	8617	6697	4850	72	108	108	522	1671	320	67	61	0	0.259	0.320	0.283	0.124	4.931	0.328	0.860	80	569	100	10709	8698	-1.951	2200	8509	2109	6589	172623
23	12	18	Hs~Ref:NM_012199.2~uORF:IOH55724~RFU:3341.7	HA20457~B23R18C12	13970	28630	110	2248	2274	785	34	49	49	125	194	155	100	100	0	491	479	97	20	132	132	203	175	86	96	55	0	6.125	6.412	6.626	6.235	1.522	7.434	0.640	80	589	100	2558	2572	2.615	2199	359	2225	347	181902
27	3	17	Hs~MGC:BC012499.1~uORF:IOH11855~RFU:5992.37	HA20457~B27R17C03	12220	32930	110	2246	2506	1143	45	47	47	48	6	12	100	100	0	383	389	41	10	101	101	102	8	7	100	100	0	7.798	8.538	7.970	7.716	1.580	10.603	0.763	80	559	100	2481	2747	2.963	2199	282	2459	288	200450
11	6	13	Hs~MGC:BC007346.2~uORF:IOH7023~RFU:56565.5	HA20457~B11R13C06	12680	14090	110	2240	2382	532	22	49	49	207	314	151	100	100	0	763	791	90	11	99	99	200	158	79	100	100	0	3.300	3.371	3.387	3.317	1.300	4.006	0.644	80	549	100	2855	3025	1.722	2191	664	2333	692	190571
41	2	1	AlexaAntiMouseAb~N/A	HA20457~B41R01C02	3110	47770	110	2239	2166	976	45	47	47	54	50	92	97	96	0	11297	10661	1951	18	162	162	292	230	78	100	100	0	0.197	0.202	0.197	0.155	2.587	0.206	0.817	80	597	100	13327	12618	-2.345	2192	11135	2119	10499	173265
47	22	2	Hs~Ref:NM_003093.1~uORF:IOH41465~RFU:55435.27	HA20457~B47R02C22	16160	52420	110	2239	2101	450	21	46	46	51	28	54	100	100	0	1376	1418	173	12	166	166	214	129	60	100	100	0	1.812	1.641	1.666	1.604	1.360	1.648	0.807	80	568	100	3403	3307	0.858	2193	1210	2055	1252	168047
45	18	14	Hs~Ref:NM_030952.1~uORF:IOH21129~RFU:10653.83	HA20457~B45R14C18	6290	54850	110	2238	2062	935	45	46	46	49	20	40	100	100	0	712	716	120	16	210	210	222	53	23	100	100	0	4.367	3.984	3.731	3.428	1.835	4.793	0.810	80	567	100	2694	2522	2.126	2192	502	2016	506	164930
2	2	11	AlexaAntiMouseAb~N/A	HA20457~B02R11C02	7350	4780	110	2233	2142	839	39	47	47	47	3	6	100	100	0	9130	9002	625	6	132	132	166	71	42	100	100	0	0.243	0.236	0.243	0.197	2.280	0.239	0.821	80	545	100	11184	10965	-2.041	2186	8998	2095	8870	171393
44	22	1	AlexaAntiMouseAb~N/A	HA20457~B44R01C22	20620	47650	110	2233	2025	867	42	46	46	48	14	29	98	97	0	10001	9635	1614	16	124	124	134	43	32	100	100	0	0.221	0.208	0.212	0.167	2.362	0.211	0.820	80	611	100	12064	11490	-2.175	2187	9877	1979	9511	162005
24	13	18	Hs~Ref:NM_012279.1~uORF:IOH6492~RFU:16895.2	HA20457~B24R18C13	18710	28630	110	2229	2202	721	32	49	49	57	48	84	100	100	0	1728	1663	314	18	94	94	99	25	25	100	100	0	1.334	1.372	1.266	1.323	1.604	1.629	0.694	80	576	100	3814	3722	0.416	2180	1634	2153	1569	176120
20	22	1	AlexaAntiMouseAb~N/A	HA20457~B20R01C22	20440	20670	110	2225	2274	1172	51	48	48	51	22	43	96	96	0	9478	9080	1742	19	101	101	152	84	55	100	100	0	0.232	0.248	0.244	0.178	3.090	0.262	0.798	80	612	100	11554	11205	-2.107	2177	9377	2226	8979	181881
46	3	5	Hs~Ref:NM_006439.3~uORF:IOH12221~RFU:41506.7	HA20457~B46R05C03	7830	53070	110	2222	2201	649	29	47	47	126	196	155	100	100	0	991	1010	99	9	210	210	322	211	65	100	100	0	2.785	2.693	2.839	2.578	1.327	3.340	0.619	80	546	100	2956	2954	1.478	2175	781	2154	800	176068
25	2	11	AlexaAntiMouseAb~N/A	HA20457~B25R11C02	2990	31760	110	2218	2241	891	39	48	48	51	28	54	100	100	0	8462	7884	1482	18	130	130	202	122	60	100	100	0	0.260	0.283	0.288	0.256	1.658	0.287	0.838	80	593	100	10502	9947	-1.941	2170	8332	2193	7754	179280
20	3	15	Hs~Ref:NM_000545.3~uORF:IOH44420~RFU:37823.14	HA20457~B20R15C03	16660	23490	110	2214	2385	607	25	50	50	88	103	117	100	100	0	456	460	28	6	114	114	144	63	43	100	100	0	6.327	6.749	6.473	6.530	1.300	8.212	0.710	80	566	100	2506	2681	2.662	2164	342	2335	346	190796
16	16	6	Hs~Ref:NM_003287.2~uORF:IOH59709~RFU:15030.57	HA20457~B16R06C16	19270	17210	110	2212	2233	924	41	440	440	3876	5914	152	0	0	0	247	244	34	13	119	119	138	63	45	96	55	0	13.844	14.344	13.232	12.396	1.959	154.739	0.181	80	579	100	1900	1918	3.791	1772	128	1793	125	178669
4	22	1	AlexaAntiMouseAb~N/A	HA20457~B04R01C22	20380	2700	110	2209	1979	1039	52	47	47	47	5	10	96	95	0	10571	10327	1265	12	268	268	290	98	33	100	100	0	0.210	0.192	0.200	0.124	4.527	0.198	0.726	80	602	100	12465	11991	-2.253	2162	10303	1932	10059	158330
9	1	1	AlexaAntiMouseAb~N/A	HA20457~B09R01C01	2700	11720	110	2205	2166	810	37	48	48	53	28	52	100	100	0	11136	10993	1020	9	117	117	162	94	58	100	100	0	0.196	0.195	0.207	0.175	1.642	0.190	0.753	80	628	100	13176	12994	-2.353	2157	11019	2118	10876	173254
24	17	8	Hs~Ref:NM_004397.3~uORF:IOH45655~RFU:22718.56	HA20457~B24R08C17	19490	26600	110	2199	2208	574	25	51	51	86	114	132	100	100	0	1334	1282	257	20	131	131	137	96	70	98	98	0	1.786	1.874	1.715	1.948	2.011	2.122	0.732	80	567	100	3351	3308	0.836	2148	1203	2157	1151	176670
16	20	5	Hs~Ref:NM_003521.2~uORF:IOH40169~RFU:23211.79	HA20457~B16R05C20	20070	17010	110	2197	2176	455	20	49	49	105	163	155	100	100	0	1766	1704	214	12	122	122	168	103	61	100	100	0	1.307	1.345	1.308	1.326	1.324	1.477	0.719	80	577	100	3792	3709	0.386	2148	1644	2127	1582	174115
37	1	1	AlexaAntiMouseAb~N/A	HA20457~B37R01C01	2860	43290	110	2193	2082	918	44	49	49	58	38	65	98	98	0	11673	10917	2072	18	491	491	1421	4268	300	98	83	0	0.192	0.195	0.193	0.168	1.873	0.089	0.314	80	612	100	13326	12459	-2.383	2144	11182	2033	10426	166564
25	2	3	Hs~MGC:BC030516.1~uORF:IOH21650~RFU:45047.43	HA20457~B25R03C02	2980	30160	110	2190	2257	728	32	48	48	88	159	180	100	100	0	2023	2021	72	3	123	123	158	149	94	100	100	0	1.127	1.164	1.142	1.103	1.392	1.219	0.680	80	580	100	4042	4107	0.173	2142	1900	2209	1898	180589
18	21	22	AlexaAntiMouseAb~N/A	HA20457~B18R22C21	11250	24930	110	2188	1855	985	53	49	49	54	30	55	95	90	0	6891	5918	1991	33	110	110	178	109	61	100	100	0	0.315	0.311	0.327	0.205	3.113	0.331	0.855	80	598	100	8920	7614	-1.665	2139	6781	1806	5808	148365
8	17	8	Hs~MGC:BC033677.1~uORF:IOH40219~RFU:11020.74	HA20457~B08R08C17	19380	8570	110	2187	2251	674	29	47	47	62	66	106	100	100	0	1775	1740	360	20	120	120	133	60	45	100	100	0	1.293	1.360	1.320	1.327	1.485	1.495	0.746	80	558	100	3795	3824	0.371	2140	1655	2204	1620	180070
20	21	1	AlexaAntiMouseAb~N/A	HA20457~B20R01C21	20240	20670	110	2187	2066	912	44	49	49	51	21	41	98	98	0	9601	8795	2149	24	149	149	174	85	48	100	100	0	0.226	0.233	0.237	0.194	2.338	0.237	0.840	80	590	100	11590	10663	-2.144	2138	9452	2017	8646	165294
43	2	15	Hs~Ref:NM_014955.2~uORF:IOH45543~RFU:14764.19	HA20457~B43R15C02	12100	50500	110	2182	2061	674	32	49	49	212	404	190	100	96	0	986	998	91	9	202	202	275	154	56	100	100	0	2.721	2.528	2.562	2.387	1.488	2.971	0.745	80	585	100	2917	2808	1.444	2133	784	2012	796	164918
8	13	18	Hs~Ref:NM_175923.2~uORF:IOH22051~RFU:5871.18	HA20457~B08R18C13	18580	10570	110	2178	2085	495	23	47	47	49	21	42	100	100	0	1394	1388	175	12	95	95	101	27	26	100	100	0	1.640	1.576	1.591	1.544	1.357	1.720	0.812	80	574	100	3430	3331	0.714	2131	1299	2038	1293	166836
8	1	11	AlexaAntiMouseAb~N/A	HA20457~B08R11C01	16170	9180	110	2176	1994	651	32	47	47	50	18	36	100	100	0	9097	8588	1901	22	136	136	165	83	50	100	100	0	0.238	0.230	0.236	0.221	2.004	0.220	0.780	80	577	100	11090	10399	-2.073	2129	8961	1947	8452	159532
44	21	1	AlexaAntiMouseAb~N/A	HA20457~B44R01C21	20430	47650	110	2173	2252	886	39	46	46	48	15	31	100	100	0	9940	9265	2091	22	120	120	128	30	23	100	100	0	0.217	0.241	0.240	0.229	1.992	0.228	0.773	80	599	100	11947	11351	-2.207	2127	9820	2206	9145	180185
48	5	12	Hs~Ref:NM_001014.2~uORF:IOH4063~RFU:28807.66	HA20457~B48R12C05	17300	54430	110	2167	2281	713	31	57	57	148	172	116	100	100	0	1561	1556	213	13	248	248	244	65	26	100	100	0	1.607	1.700	1.608	1.630	1.466	1.755	0.750	80	568	100	3423	3532	0.684	2110	1313	2224	1308	182440
33	2	11	AlexaAntiMouseAb~N/A	HA20457~B33R11C02	3050	40740	110	2166	2279	836	36	47	47	51	49	96	100	100	0	9137	8692	1500	17	177	177	221	98	44	100	100	0	0.236	0.262	0.238	0.247	1.615	0.242	0.721	80	568	100	11079	10747	-2.080	2119	8960	2232	8515	182329
11	9	17	Hs~Ref:NM_012341.2~uORF:IOH26105~RFU:11188.86	HA20457~B11R17C09	13290	14880	110	2165	2114	479	22	47	47	63	126	200	100	100	0	1913	1938	223	11	90	90	97	44	45	100	100	0	1.162	1.119	1.121	1.088	1.303	1.177	0.853	80	568	100	3941	3915	0.216	2118	1823	2067	1848	169124
1	21	1	AlexaAntiMouseAb~N/A	HA20457~B01R01C21	6640	2760	110	2165	1946	970	49	46	46	69	137	198	91	90	0	11118	10118	2464	24	123	123	187	209	111	100	100	0	0.193	0.190	0.208	0.133	4.206	0.195	0.755	80	614	100	13114	11895	-2.375	2119	10995	1900	9995	155640
12	17	4	Hs~MGC:BC033708.1~uORF:IOH21753~RFU:44001.09	HA20457~B12R04C17	19410	12290	110	2157	2148	480	22	356	356	514	501	97	98	93	0	829	843	52	6	400	400	409	173	42	100	100	0	4.198	4.045	4.133	3.824	1.564	4.135	0.612	80	583	100	2230	2235	2.070	1801	429	1792	443	171823
12	2	4	Hs~MGC:BC011842.2~uORF:IOH14099~RFU:37279.48	HA20457~B12R04C02	16410	12310	110	2153	2167	660	30	52	52	201	387	192	100	100	0	1826	1809	179	9	191	191	227	171	75	100	100	0	1.285	1.307	1.265	1.251	1.354	1.383	0.789	80	583	100	3736	3733	0.362	2101	1635	2115	1618	173387
8	14	18	Hs~Ref:NM_175923.2~uORF:IOH22051~RFU:6137.55	HA20457~B08R18C14	18780	10580	110	2152	2118	774	36	47	47	55	45	81	100	100	0	1365	1338	188	14	95	95	104	29	27	100	100	0	1.657	1.666	1.647	1.538	1.599	2.042	0.748	80	568	100	3375	3314	0.729	2105	1270	2071	1243	169422
4	21	1	AlexaAntiMouseAb~N/A	HA20457~B04R01C21	20190	2700	110	2151	2010	812	40	47	47	47	2	4	100	100	0	10731	10558	919	8	247	247	275	90	32	100	100	0	0.201	0.190	0.203	0.162	1.993	0.186	0.780	80	570	100	12588	12274	-2.317	2104	10484	1963	10311	160835
15	20	13	Hs~MGC:BC009348.2~uORF:IOH12064~RFU:23905.02	HA20457~B15R13C20	15560	18580	110	2150	2044	660	32	49	49	214	348	162	100	98	0	2446	2451	192	7	98	98	224	266	118	100	100	0	0.895	0.848	0.813	0.797	1.458	0.872	0.713	80	566	100	4449	4348	-0.160	2101	2348	1995	2353	163520
12	20	5	Hs~MGC:BC064984.1~uORF:IOH40665~RFU:41063.99	HA20457~B12R05C20	20010	12510	110	2147	2119	641	30	52	52	250	361	144	100	98	0	1795	1635	486	29	184	184	281	185	65	100	95	0	1.300	1.425	1.480	1.480	1.463	1.535	0.726	80	558	100	3706	3518	0.379	2095	1611	2067	1451	169528
3	7	5	Hs~Ref:NM_001022.3~uORF:IOH4572~RFU:26337.34	HA20457~B03R05C07	12830	3530	110	2145	2173	452	20	49	49	128	209	163	100	100	0	2474	2450	171	6	141	141	182	95	52	100	100	0	0.898	0.920	0.894	0.899	1.241	0.968	0.794	80	557	100	4429	4433	-0.155	2096	2333	2124	2309	173859
20	4	15	Hs~Ref:NM_000545.3~uORF:IOH44420~RFU:37746.72	HA20457~B20R15C04	16850	23490	110	2144	2241	672	29	49	49	96	161	167	100	100	0	449	452	30	6	100	100	128	53	41	100	100	0	6.003	6.227	5.841	6.000	1.300	8.369	0.698	80	548	100	2444	2544	2.586	2095	349	2192	352	179256
13	19	9	Hs~MGC:BC015586.2~uORF:IOH46065~RFU:11003.53	HA20457~B13R09C19	6350	17860	110	2143	2174	870	40	50	50	79	84	106	100	100	0	1220	1150	249	21	125	125	157	67	42	100	100	0	1.911	2.072	1.899	1.958	1.612	2.419	0.738	80	564	100	3188	3149	0.935	2093	1095	2124	1025	173882
17	2	11	AlexaAntiMouseAb~N/A	HA20457~B17R11C02	2910	22780	110	2141	2099	874	41	48	48	48	7	14	100	100	0	8170	7811	1218	15	121	121	144	56	38	100	100	0	0.260	0.267	0.258	0.232	1.789	0.267	0.829	80	566	100	10142	9741	-1.943	2093	8049	2051	7690	167907
3	1	1	AlexaAntiMouseAb~N/A	HA20457~B03R01C01	11630	2730	110	2141	1981	782	39	47	47	47	3	6	100	100	0	11957	10948	2386	21	108	108	148	94	63	100	100	0	0.177	0.178	0.194	0.160	1.879	0.176	0.826	80	621	100	13943	12774	-2.500	2094	11849	1934	10840	158506
43	2	22	ERa~N/A	HA20457~B43R22C02	12100	51900	110	2137	2309	710	30	49	49	194	353	181	100	98	0	1080	1249	1071	85	265	265	310	175	56	100	100	0	2.562	2.297	2.663	2.514	1.606	2.212	0.314	80	560	100	2903	3244	1.357	2088	815	2260	984	184740
9	2	14	Hs~MGC:BC028151.1~uORF:IOH11514~RFU:13844.98	HA20457~B09R14C02	2910	14330	110	2136	2021	844	41	47	47	49	22	44	100	100	0	1472	1454	190	13	96	96	98	18	18	100	100	0	1.518	1.454	1.529	1.324	1.571	1.723	0.725	80	586	100	3465	3332	0.602	2089	1376	1974	1358	161655
7	2	18	Hs~MGC:BC002755.1~N/A~RFU:41944.32	HA20457~B07R18C02	11910	10630	110	2135	2274	609	26	560	560	830	776	93	96	52	0	591	596	57	9	288	288	320	123	38	100	86	0	5.198	5.565	5.438	5.313	1.449	7.868	0.528	80	598	100	1878	2022	2.378	1575	303	1714	308	181918
45	14	13	Hs~Ref:NM_004060.2~uORF:IOH4393~RFU:12403.93	HA20457~B45R13C14	5480	54640	110	2135	2192	765	34	47	47	112	290	258	100	97	0	1323	1275	185	14	192	192	217	124	57	100	100	0	1.846	1.981	1.894	1.862	1.451	2.252	0.824	80	558	100	3219	3228	0.885	2088	1131	2145	1083	175385
15	8	12	Hs~Ref:NM_016508.2~uORF:IOH21339~RFU:46366.26	HA20457~B15R12C08	13170	18400	110	2133	2261	745	32	56	56	244	313	128	100	100	0	1129	1139	117	10	168	168	237	149	62	100	100	0	2.161	2.271	2.209	2.160	1.414	2.523	0.723	80	585	100	3038	3176	1.112	2077	961	2205	971	180896
45	8	16	Hs~MGC:BC048970.1~uORF:IOH26893~RFU:10545.85	HA20457~B45R16C08	4290	55250	110	2133	2209	737	33	47	47	71	72	101	100	100	0	2244	2363	1104	46	183	183	187	30	16	100	100	0	1.012	0.992	1.026	1.005	1.490	0.976	0.678	80	558	100	4147	4342	0.017	2086	2061	2162	2180	176754
43	4	14	Hs~Ref:NM_194290.1~uORF:IOH42276~RFU:21185.83	HA20457~B43R14C04	12500	50300	110	2131	2292	683	29	246	246	392	418	106	100	100	0	1916	2010	376	18	403	403	368	169	45	100	100	0	1.246	1.273	1.220	1.230	1.370	1.253	0.711	80	568	100	3398	3653	0.317	1885	1513	2046	1607	183361
46	6	14	Hs~Ref:NM_001013.2~uORF:IOH5840~RFU:9808.95	HA20457~B46R14C06	8430	54850	110	2127	2299	754	32	46	46	56	42	75	100	100	0	1353	1328	269	20	209	209	215	33	15	100	100	0	1.819	2.013	1.950	1.944	1.448	2.225	0.850	80	548	100	3225	3372	0.863	2081	1144	2253	1119	183927
13	6	7	Hs~Ref:NM_033256.1~uORF:IOH13214~RFU:40253.91	HA20457~B13R07C06	3740	17480	110	2124	2198	719	32	51	51	119	147	123	100	100	0	1240	1260	123	9	131	131	194	102	52	100	100	0	1.869	1.902	1.930	1.806	1.420	2.167	0.707	80	548	100	3182	3276	0.902	2073	1109	2147	1129	175849
44	15	4	Hs~Ref:NM_016648.1~uORF:IOH41297~RFU:35834.26	HA20457~B44R04C15	19220	48260	110	2124	2094	393	18	47	47	58	63	108	100	100	0	978	976	90	9	110	110	115	32	27	100	100	0	2.393	2.364	2.237	2.332	1.259	2.492	0.845	80	595	100	2945	2913	1.259	2077	868	2047	866	167523
41	21	17	Hs~Ref:NM_001008.2~uORF:IOH11799~RFU:6496.72	HA20457~B41R17C21	6950	50980	110	2121	2119	776	36	47	47	108	210	194	98	98	0	1225	1189	195	16	154	154	196	130	66	100	100	0	1.937	2.002	1.881	1.854	1.526	2.253	0.832	80	532	100	3145	3107	0.953	2074	1071	2072	1035	169511
25	17	12	Hs~Ref:NM_000989.2~uORF:IOH3809~RFU:9902.34	HA20457~B25R12C17	6000	31950	110	2113	2093	611	29	48	48	49	15	30	100	100	0	1475	1425	225	15	112	112	125	33	26	100	100	0	1.515	1.558	1.696	1.512	1.434	1.646	0.785	80	575	100	3428	3358	0.599	2065	1363	2045	1313	167410
36	22	1	AlexaAntiMouseAb~N/A	HA20457~B36R01C22	20600	38670	110	2111	1914	826	43	48	48	104	212	203	95	95	0	10514	9732	1935	19	88	88	184	198	107	100	100	0	0.198	0.193	0.197	0.162	2.028	0.196	0.803	80	612	100	12489	11510	-2.337	2063	10426	1866	9644	153156
45	13	2	Hs~Ref:NM_018039.2~uORF:IOH43857~RFU:11733.63	HA20457~B45R02C13	5280	52450	110	2110	2123	881	41	46	46	47	8	17	100	100	0	1279	1268	148	11	169	169	166	32	19	100	100	0	1.859	1.890	1.921	1.707	1.597	2.254	0.791	80	568	100	3174	3176	0.895	2064	1110	2077	1099	169833
19	22	22	AlexaAntiMouseAb~N/A	HA20457~B19R22C22	16010	24890	110	2109	2152	915	42	48	48	60	46	76	97	97	0	6470	6144	1226	19	123	123	179	110	61	100	100	0	0.325	0.349	0.323	0.278	3.257	0.341	0.755	80	611	100	8408	8125	-1.623	2061	6347	2104	6021	172128
32	22	1	AlexaAntiMouseAb~N/A	HA20457~B32R01C22	20550	34180	110	2106	2193	982	44	47	47	47	3	6	100	100	0	11803	10147	3467	34	92	92	97	29	29	100	100	0	0.176	0.213	0.220	0.206	1.710	0.210	0.871	80	629	100	13770	12201	-2.508	2059	11711	2146	10055	175419
42	2	15	Hs~MGC:BC012924.1~uORF:IOH11017~RFU:32771.83	HA20457~B42R15C02	7610	50560	110	2096	2257	998	44	51	51	160	373	233	100	96	0	569	566	46	8	203	203	217	73	33	100	100	0	5.587	6.077	5.425	5.487	1.658	7.779	0.582	80	555	100	2411	2569	2.482	2045	366	2206	363	180567
16	11	2	Hs~Ref:NM_013293.1~uORF:IOH9999~RFU:7467.25	HA20457~B16R02C11	18250	16410	110	2095	2171	680	31	51	51	183	280	153	100	100	0	2483	2288	541	23	137	137	205	157	76	100	97	0	0.871	0.986	1.012	0.988	1.520	1.015	0.758	80	548	100	4390	4271	-0.199	2044	2346	2120	2151	173712
9	1	11	AlexaAntiMouseAb~N/A	HA20457~B09R11C01	2710	13740	110	2091	2053	851	41	48	48	70	81	115	98	98	0	8486	8260	1203	14	120	120	219	184	84	100	100	0	0.244	0.246	0.239	0.214	1.780	0.254	0.839	80	598	100	10409	10145	-2.034	2043	8366	2005	8140	164257
21	2	4	Hs~MGC:BC030702.1~uORF:IOH22356~RFU:25458.52	HA20457~B21R04C02	2970	25850	110	2089	2051	522	25	48	48	58	89	153	100	100	0	1537	1522	92	6	125	125	135	55	40	100	100	0	1.445	1.434	1.425	1.378	1.382	1.513	0.844	80	558	100	3453	3400	0.532	2041	1412	2003	1397	164104
12	18	4	Hs~MGC:BC033708.1~uORF:IOH21753~RFU:42721.62	HA20457~B12R04C18	19620	12300	110	2088	2153	528	24	58	58	341	456	133	100	100	0	845	858	64	7	232	232	300	200	66	100	100	0	3.312	3.347	3.186	3.257	1.343	4.023	0.598	80	584	100	2643	2721	1.728	2030	613	2095	626	172252
21	21	2	Hs~Ref:XM_088679.2~uORF:IOH43003~RFU:11165.36	HA20457~B21R02C21	6770	25450	110	2088	2032	540	26	53	53	163	210	128	100	100	0	2415	2284	452	19	309	309	314	118	37	100	100	0	0.966	1.002	0.991	0.989	1.371	0.926	0.759	80	566	100	4141	3954	-0.049	2035	2106	1979	1975	162552
6	1	11	AlexaAntiMouseAb~N/A	HA20457~B06R11C01	7190	9260	110	2087	2169	723	33	47	47	97	226	232	100	96	0	9103	9095	582	6	122	122	202	202	100	100	100	0	0.227	0.236	0.228	0.220	1.547	0.233	0.786	80	603	100	11021	11095	-2.138	2040	8981	2122	8973	173506
3	21	1	AlexaAntiMouseAb~N/A	HA20457~B03R01C21	15640	2720	110	2084	2208	758	34	47	47	47	2	4	100	100	0	11559	10857	1863	17	111	111	143	66	46	100	100	0	0.178	0.201	0.189	0.192	1.503	0.200	0.872	80	580	100	13485	12907	-2.491	2037	11448	2161	10746	176640
6	11	5	Hs~Ref:NM_007194.2~N/A~RFU:18648.47	HA20457~B06R05C11	9190	8040	110	2076	2071	656	31	47	47	54	73	135	100	100	0	471	463	45	9	116	116	124	37	29	100	100	0	5.715	5.833	6.295	5.499	1.475	6.690	0.683	80	577	100	2384	2371	2.515	2029	355	2024	347	165675
28	14	4	Hs~MGC:BC010537.1~uORF:IOH10170~RFU:48371.47	HA20457~B28R04C14	18900	30280	110	2075	1939	450	23	53	53	266	354	133	100	100	0	2224	2213	91	4	109	109	172	117	68	100	100	0	0.956	0.896	0.966	0.869	1.291	0.875	0.748	80	602	100	4137	3990	-0.065	2022	2115	1886	2104	155123
40	17	5	Hs~Ref:NM_001001330.1~uORF:IOH40137~RFU:12373.51	HA20457~B40R05C17	19580	44000	110	2073	2138	690	32	47	47	50	39	78	100	100	0	1133	1139	83	7	104	104	106	14	13	100	100	0	1.969	2.020	1.886	1.921	1.384	2.420	0.715	80	568	100	3055	3126	0.977	2026	1029	2091	1035	171046
9	13	9	Hs~MGC:BC028711.2~uORF:IOH11814~RFU:21284.41	HA20457~B09R09C13	5120	13330	110	2070	2002	762	38	48	48	65	67	103	100	100	0	1247	1240	102	8	112	112	125	51	40	100	100	0	1.781	1.732	1.767	1.609	1.474	1.961	0.776	80	556	100	3157	3082	0.833	2022	1135	1954	1128	160183
34	13	15	Hs~IVGN:PM_2141~Ext:Histone_F2a2~N/A	HA20457~B34R15C13	9710	41550	110	2067	2097	974	46	134	134	237	272	114	100	92	0	1072	1096	214	19	466	466	452	244	53	93	76	0	3.190	3.116	3.089	2.838	1.577	4.114	0.547	80	568	100	2539	2593	1.673	1933	606	1963	630	167765
2	7	13	Hs~MGC:BC096708.1~uORF:IOH63336~RFU:18421.4	HA20457~B02R13C07	8360	5180	110	2061	2132	740	34	47	47	56	40	71	100	100	0	1988	1954	140	7	134	134	149	61	40	100	100	0	1.086	1.146	1.190	1.072	1.485	1.255	0.673	80	557	100	3868	3905	0.119	2014	1854	2085	1820	170593
11	3	20	Hs~Ref:NM_016483.3~uORF:IOH22255~RFU:11473.8	HA20457~B11R20C03	12100	15480	110	2058	2014	741	36	48	48	56	54	96	100	100	0	1633	1639	101	6	89	89	91	17	18	100	100	0	1.302	1.268	1.294	1.152	1.651	1.454	0.734	80	562	100	3554	3516	0.381	2010	1544	1966	1550	161133
9	20	17	Hs~MGC:BC027900.1~uORF:IOH27306~RFU:10696.51	HA20457~B09R17C20	6520	14920	110	2056	2332	950	40	51	51	234	396	169	100	97	0	577	661	200	30	104	104	130	54	41	100	100	0	4.239	4.095	3.804	3.941	1.655	5.998	0.520	80	557	100	2478	2838	2.084	2005	473	2281	557	186545
5	14	19	Hs~MGC:BC010467.1~uORF:IOH11119~RFU:36500.19	HA20457~B05R19C14	5290	10870	110	2055	2146	609	28	48	48	76	108	142	100	100	0	1950	1924	166	8	112	112	135	85	62	100	100	0	1.092	1.158	1.148	1.114	1.308	1.220	0.841	80	558	100	3845	3910	0.127	2007	1838	2098	1812	171657
42	3	15	Hs~MGC:BC069092.1~uORF:IOH63641~RFU:33697.6	HA20457~B42R15C03	7810	50550	110	2047	2109	661	31	55	55	201	262	130	100	100	0	779	807	66	8	250	250	277	124	44	100	100	0	3.766	3.688	3.654	3.508	1.466	4.229	0.688	80	554	100	2521	2611	1.913	1992	529	2054	557	168712
2	6	16	Hs~Ref:NM_199168.2~CAT_PHC1346~RFU:1211.79	HA20457~B02R16C06	8160	5780	110	2045	2005	564	28	48	48	86	127	147	100	100	0	803	802	50	6	141	141	151	32	21	100	100	0	3.017	2.961	2.998	2.830	1.366	3.566	0.751	80	554	100	2659	2618	1.593	1997	662	1957	661	160427
43	12	5	Hs~MGC:NM_138730.1~uORF:IOH9857~RFU:9925.6	HA20457~B43R05C12	14090	48510	110	2044	2052	579	28	50	50	229	365	159	100	97	0	2335	2208	275	12	146	146	271	275	101	100	100	0	0.911	0.971	1.001	0.938	1.394	0.986	0.711	80	554	100	4183	4064	-0.135	1994	2189	2002	2062	164194
46	4	5	Hs~Ref:NM_006439.3~uORF:IOH12221~RFU:40438.86	HA20457~B46R05C04	8020	53050	110	2043	1968	745	37	50	50	242	394	162	93	92	0	859	1371	1680	122	244	244	513	620	120	47	20	0	3.241	1.702	2.383	2.052	2.101	0.820	0.158	80	537	100	2608	3045	1.696	1993	615	1918	1127	157471
10	11	16	Hs~Ref:NM_145909.1~uORF:IOH45888~RFU:24919.21	HA20457~B10R16C11	9190	14730	110	2039	2021	526	26	48	48	313	1341	428	91	8	0	1606	1607	127	7	96	96	126	103	81	100	100	0	1.319	1.306	1.308	1.264	1.320	1.372	0.743	80	546	100	3501	3484	0.399	1991	1510	1973	1511	161660
17	1	1	AlexaAntiMouseAb~N/A	HA20457~B17R01C01	2710	20770	110	2038	1975	600	30	49	49	50	9	18	100	100	0	9534	9201	1130	12	130	130	168	98	58	100	100	0	0.212	0.212	0.220	0.195	1.657	0.211	0.869	80	602	100	11393	10997	-2.241	1989	9404	1926	9071	157982
1	22	1	AlexaAntiMouseAb~N/A	HA20457~B01R01C22	6850	2760	110	2029	1981	843	42	47	47	64	117	182	96	96	0	11589	10186	3035	29	144	144	209	167	79	100	100	0	0.173	0.193	0.202	0.181	2.119	0.181	0.772	80	629	100	13427	11976	-2.530	1982	11445	1934	10042	158484
36	14	4	Hs~MGC:BC025266.1~uORF:IOH23199~RFU:7.44	HA20457~B36R04C14	19020	39270	110	2028	2027	601	29	47	47	48	11	22	100	100	0	1370	1349	193	14	99	99	104	59	56	100	100	0	1.559	1.584	1.523	1.526	1.459	1.911	0.656	80	566	100	3252	3230	0.640	1981	1271	1980	1250	162180
9	18	19	Hs~MGC:NM_175887.2~uORF:IOH27336~RFU:17031.25	HA20457~B09R19C18	6140	15340	110	2026	2268	749	33	49	49	225	462	205	100	100	0	2802	2689	488	18	93	93	258	465	180	100	97	0	0.730	0.855	0.835	0.835	1.388	0.873	0.733	80	564	100	4686	4815	-0.454	1977	2709	2219	2596	181430
40	14	9	Hs~Ref:NM_003690.3~uORF:IOH57108~RFU:31472.71	HA20457~B40R09C14	18990	44820	110	2023	2043	564	27	47	47	62	89	143	100	100	0	1371	1375	106	7	107	107	117	49	41	100	100	0	1.563	1.574	1.533	1.523	1.371	1.694	0.778	80	556	100	3240	3264	0.645	1976	1264	1996	1268	163414
33	1	1	AlexaAntiMouseAb~N/A	HA20457~B33R01C01	2840	38740	110	2022	2225	807	36	48	48	90	153	170	100	98	0	10978	10680	984	9	249	249	343	200	58	100	100	0	0.184	0.209	0.192	0.194	1.465	0.207	0.829	80	602	100	12703	12608	-2.442	1974	10729	2177	10431	177989
31	21	22	AlexaAntiMouseAb~N/A	HA20457~B31R22C21	15820	38420	110	2022	1807	729	40	46	46	50	36	72	100	100	0	6990	6703	1088	16	134	134	156	58	37	100	100	0	0.288	0.268	0.285	0.242	1.741	0.256	0.774	80	608	100	8832	8330	-1.795	1976	6856	1761	6569	144592
48	6	12	Hs~Ref:NM_001014.2~uORF:IOH4063~RFU:27906.44	HA20457~B48R12C06	17500	54430	110	2013	2149	655	30	71	71	205	234	114	100	100	0	1612	1580	155	9	381	381	444	255	57	100	100	0	1.578	1.733	1.699	1.663	1.488	2.032	0.664	80	559	100	3173	3277	0.658	1942	1231	2078	1199	171951
37	1	20	Hs~Ref:NM_004965.3~uORF:IOH4772~RFU:16111.42	HA20457~B37R20C01	2870	47080	110	2011	2093	705	33	49	49	309	445	144	98	92	0	2621	4181	4070	97	357	357	453	306	67	100	100	0	0.867	0.535	0.777	0.649	2.250	0.178	0.167	80	596	100	4226	5868	-0.207	1962	2264	2044	3824	167447
11	15	2	Hs~MGC:BC007228.1~uORF:IOH6059~RFU:27430.25	HA20457~B11R02C15	14480	11890	110	2006	2180	733	33	50	50	130	289	222	100	100	0	2070	2062	134	6	115	115	139	89	64	100	100	0	1.001	1.094	0.965	1.038	1.393	1.174	0.725	80	555	100	3911	4077	0.001	1956	1955	2130	1947	174439
18	22	22	AlexaAntiMouseAb~N/A	HA20457~B18R22C22	11450	24930	110	2006	1824	833	45	48	48	49	19	38	97	96	0	6740	6079	1602	26	108	108	188	136	72	100	100	0	0.295	0.297	0.298	0.231	2.357	0.316	0.852	80	620	100	8590	7747	-1.760	1958	6632	1776	5971	145939
47	21	2	Hs~Ref:NM_003093.1~uORF:IOH41465~RFU:59049.48	HA20457~B47R02C21	15970	52420	110	2000	2031	659	32	46	46	49	17	34	100	100	0	1408	1411	130	9	161	161	234	155	66	100	100	0	1.567	1.588	1.558	1.501	1.409	1.728	0.800	80	548	100	3201	3235	0.648	1954	1247	1985	1250	162492
31	22	22	AlexaAntiMouseAb~N/A	HA20457~B31R22C22	16020	38430	110	1997	1906	722	37	47	47	47	3	6	100	100	0	6841	6431	1159	18	126	126	139	46	33	100	100	0	0.290	0.295	0.304	0.261	2.224	0.276	0.774	80	628	100	8665	8164	-1.784	1950	6715	1859	6305	152451
46	12	18	Hs~Ref:NM_024578.1~uORF:IOH23128~RFU:23111.35	HA20457~B46R18C12	9640	55650	110	1996	2157	818	37	46	46	51	62	121	100	100	0	1355	1345	138	10	208	208	226	247	109	100	100	0	1.700	1.857	1.691	1.740	1.483	2.074	0.746	80	558	100	3097	3248	0.766	1950	1147	2111	1137	172524
10	12	16	Hs~Ref:NM_145909.1~uORF:IOH45888~RFU:23858.08	HA20457~B10R16C12	9380	14740	110	1996	2122	572	26	48	48	74	113	152	100	100	0	1571	1580	99	6	97	97	111	39	35	100	100	0	1.322	1.399	1.369	1.344	1.344	1.543	0.809	80	492	100	3422	3557	0.402	1948	1474	2074	1483	169741
35	4	5	Hs~MGC:BC010919.1~uORF:IOH27800~RFU:5152.53	HA20457~B35R05C04	12450	39510	110	1994	2097	681	32	47	47	49	15	30	100	100	0	723	727	208	28	112	112	120	30	25	100	100	0	3.187	3.333	3.193	3.358	1.451	3.685	0.831	80	550	100	2558	2665	1.672	1947	611	2050	615	167778
45	1	1	AlexaAntiMouseAb~N/A	HA20457~B45R01C01	2870	52250	110	1993	1884	884	46	46	46	55	44	80	98	98	0	10147	9128	2790	30	207	207	326	223	68	100	100	0	0.196	0.206	0.197	0.177	1.900	0.212	0.852	80	612	100	11887	10759	-2.352	1947	9940	1838	8921	150757
25	18	12	Hs~Ref:NM_000989.2~uORF:IOH3809~RFU:10146.95	HA20457~B25R12C18	6190	31950	110	1992	2194	645	29	48	48	52	52	100	100	100	0	1377	1384	161	11	110	110	119	29	24	100	100	0	1.534	1.684	1.603	1.620	1.363	1.850	0.811	80	565	100	3211	3420	0.618	1944	1267	2146	1274	175546
26	22	22	AlexaAntiMouseAb~N/A	HA20457~B26R22C22	11530	33960	110	1991	2048	776	37	47	47	47	2	4	100	98	0	6727	6252	1518	24	111	111	124	45	36	100	100	0	0.294	0.326	0.311	0.299	1.796	0.327	0.830	80	621	100	8560	8142	-1.767	1944	6616	2001	6141	163844
22	7	21	Hs~Ref:NM_015609.1~uORF:IOH23006~RFU:18233.82	HA20457~B22R21C07	8430	29230	110	1991	1886	679	36	48	48	131	311	237	97	96	0	3109	2940	556	18	126	126	190	208	109	100	100	0	0.651	0.653	0.625	0.614	1.454	0.719	0.789	80	558	100	4926	4652	-0.618	1943	2983	1838	2814	150890
29	22	22	AlexaAntiMouseAb~N/A	HA20457~B29R22C22	7070	38420	110	1984	1974	751	38	49	49	134	389	290	97	95	0	7398	7224	655	9	216	216	256	185	72	100	100	0	0.269	0.275	0.264	0.246	1.662	0.281	0.859	80	620	100	9117	8933	-1.892	1935	7182	1925	7008	157913
12	7	6	Hs~Ref:NM_001017417.1~uORF:IOH54734~RFU:60901.23	HA20457~B12R06C07	17410	12710	110	1977	2652	3031	114	107	107	453	538	118	100	97	0	1737	1729	82	4	296	296	450	392	87	100	100	0	1.298	1.776	1.284	1.429	1.669	4.615	0.252	80	538	100	3311	3978	0.376	1870	1441	2545	1433	212190
30	3	19	Hs~MGC:BC063275.1~uORF:IOH40423~RFU:6816.41	HA20457~B30R19C03	7710	37880	110	1976	2100	605	28	47	47	58	67	115	100	100	0	1411	1387	140	10	114	114	122	56	45	100	100	0	1.487	1.613	1.558	1.552	1.364	1.738	0.821	80	583	100	3226	3326	0.573	1929	1297	2053	1273	167961
42	11	6	Hs~MGC:BC000412.1~uORF:IOH3631~RFU:15187.87	HA20457~B42R06C11	9390	48730	110	1973	2017	726	35	47	47	60	72	120	100	100	0	1309	1317	158	11	167	167	212	151	71	100	100	0	1.687	1.713	1.703	1.622	1.459	1.973	0.690	80	558	100	3068	3120	0.754	1926	1142	1970	1150	161356
19	21	22	AlexaAntiMouseAb~N/A	HA20457~B19R22C21	15800	24900	110	1972	1999	866	43	47	47	56	65	116	98	98	0	6579	6180	1059	17	128	128	194	123	63	100	100	0	0.298	0.323	0.308	0.279	1.832	0.328	0.804	80	599	100	8376	8004	-1.745	1925	6451	1952	6052	159888
34	2	9	Hs~MGC:BC068514.1~uORF:IOH40543~RFU:4336.87	HA20457~B34R09C02	7520	40350	110	1972	1954	523	26	47	47	48	15	31	100	100	0	1692	1672	243	14	124	124	126	13	10	100	100	0	1.228	1.232	1.217	1.204	1.308	1.280	0.877	80	567	100	3493	3455	0.296	1925	1568	1907	1548	156304
3	2	11	AlexaAntiMouseAb~N/A	HA20457~B03R11C02	11830	4730	110	1971	1894	817	43	49	49	50	10	20	98	98	0	9396	8847	1461	16	133	133	158	69	43	100	100	0	0.207	0.212	0.209	0.186	1.752	0.221	0.828	80	567	100	11185	10559	-2.269	1922	9263	1845	8714	151515
25	3	16	Hs~MGC:NM_015191.1~CAT:PV4792~RFU:1616.81	HA20457~B25R16C03	3200	32760	110	1970	2064	896	43	46	46	46	3	6	100	100	0	429	428	38	8	112	112	113	9	7	100	100	0	6.069	6.386	5.814	5.625	1.766	7.935	0.758	80	566	100	2241	2334	2.602	1924	317	2018	316	165086
5	8	4	Hs~MGC:BC003608.1~uORF:IOH4641~RFU:25820.96	HA20457~B05R04C08	4070	7870	110	1970	1967	548	27	47	47	51	33	64	100	100	0	447	442	43	9	98	98	103	23	22	100	100	0	5.510	5.581	5.810	5.369	1.396	6.985	0.720	80	567	100	2272	2264	2.462	1923	349	1920	344	157399
21	16	2	Hs~Ref:NM_145010.1~uORF:IOH10871~RFU:50515.25	HA20457~B21R02C16	5770	25440	110	1967	2069	482	23	49	49	146	268	183	100	100	0	1697	1805	752	41	106	106	194	222	114	100	100	0	1.206	1.189	1.236	1.210	1.505	1.242	0.545	80	567	100	3509	3719	0.270	1918	1591	2020	1699	165519
42	21	22	AlexaAntiMouseAb~N/A	HA20457~B42R22C21	11410	51910	110	1967	1991	665	33	47	47	57	53	92	100	98	0	7578	7143	1285	17	187	187	218	83	38	100	100	0	0.260	0.279	0.264	0.263	1.606	0.274	0.835	80	580	100	9311	8900	-1.945	1920	7391	1944	6956	159260
29	16	18	Hs~MGC:BC056911.1~uORF:IOH29120~RFU:32486.9	HA20457~B29R18C16	5880	37630	110	1966	2092	771	36	75	75	216	396	183	100	98	0	580	574	65	11	176	176	216	104	48	98	97	0	4.681	5.068	4.989	4.789	1.558	6.236	0.612	80	575	100	2295	2415	2.227	1891	404	2017	398	167335
24	11	16	Hs~Ref:NM_001025092.1~uORF:IOH63097~RFU:16643.01	HA20457~B24R16C11	18290	28220	110	1965	1767	624	35	49	49	60	38	63	100	100	0	1175	1105	200	18	118	118	117	19	16	100	100	0	1.813	1.741	1.779	1.622	1.494	1.913	0.846	80	566	100	2973	2705	0.858	1916	1057	1718	987	141357
45	2	11	AlexaAntiMouseAb~N/A	HA20457~B45R11C02	3080	54250	110	1959	2133	1128	52	47	47	53	25	47	100	100	0	10759	10523	1669	15	401	401	444	222	50	100	100	0	0.185	0.206	0.191	0.170	2.135	0.211	0.763	80	567	100	12270	12208	-2.438	1912	10358	2086	10122	170604
44	16	14	Hs~Ref:NM_002924.2~uORF:IOH11294~RFU:2372.58	HA20457~B44R14C16	19420	50300	110	1956	2265	1165	51	48	48	109	855	784	97	58	0	1013	965	146	15	114	114	120	24	20	100	100	0	2.122	2.605	2.264	2.341	1.700	3.566	0.591	80	581	100	2807	3068	1.086	1908	899	2217	851	181238
24	18	8	Hs~Ref:NM_004397.3~uORF:IOH45655~RFU:23161.27	HA20457~B24R08C18	19680	26600	110	1956	1969	823	41	49	49	71	72	101	100	100	0	1424	1399	191	13	83	83	108	45	41	100	100	0	1.422	1.459	1.462	1.338	1.603	1.852	0.713	80	576	100	3248	3236	0.508	1907	1341	1920	1316	157554
12	16	8	Hs~MGC:BC022471.1~uORF:IOH11199~RFU:13478.17	HA20457~B12R08C16	19220	13100	110	1954	2078	728	35	48	48	50	21	42	100	100	0	1309	1268	198	15	87	87	89	11	12	100	100	0	1.560	1.719	1.570	1.642	1.410	1.967	0.785	80	567	100	3128	3211	0.641	1906	1222	2030	1181	166210
6	1	1	AlexaAntiMouseAb~N/A	HA20457~B06R01C01	7140	7250	110	1950	1988	919	46	49	49	70	75	107	100	98	0	11133	10634	1482	13	197	197	232	120	51	100	100	0	0.174	0.186	0.168	0.161	1.710	0.189	0.701	80	621	100	12837	12376	-2.524	1901	10936	1939	10437	159008
46	5	14	Hs~Ref:NM_001013.2~uORF:IOH5840~RFU:10253.28	HA20457~B46R14C05	8240	54850	110	1949	2120	753	35	46	46	59	120	203	100	100	0	1478	1386	359	25	205	205	210	32	15	100	100	0	1.495	1.756	1.744	1.776	1.530	1.896	0.857	80	557	100	3176	3255	0.580	1903	1273	2074	1181	169589
25	5	20	Hs~Ref:NM_032848.1~uORF:IOH13466~RFU:12115.72	HA20457~B25R20C05	3600	33560	110	1949	1957	555	28	46	46	51	44	86	100	100	0	2258	2226	184	8	123	123	141	61	43	100	100	0	0.891	0.909	0.902	0.873	1.354	0.966	0.844	80	548	100	4038	4014	-0.166	1903	2135	1911	2103	156541
16	19	7	Hs~MGC:BC021234.2~uORF:IOH13820~RFU:19698.66	HA20457~B16R07C19	19880	17410	110	1949	1889	454	24	47	47	48	9	18	100	100	0	1305	1300	134	10	92	92	95	16	16	100	100	0	1.568	1.525	1.484	1.482	1.340	1.659	0.800	80	548	100	3115	3050	0.649	1902	1213	1842	1208	151140
20	16	14	Hs~MGC:BC104469.1~uORF:IOH63631~RFU:15330.79	HA20457~B20R14C16	19250	23280	110	1946	1964	649	33	49	49	97	149	153	100	100	0	1203	1202	170	14	82	82	113	79	69	100	100	0	1.692	1.710	1.670	1.610	1.496	1.866	0.792	80	556	100	3018	3035	0.759	1897	1121	1915	1120	157119
13	2	1	AlexaAntiMouseAb~N/A	HA20457~B13R01C02	2930	16270	110	1945	1909	527	27	49	49	79	101	127	100	100	0	10139	9763	1334	13	176	176	225	136	60	100	100	0	0.190	0.194	0.197	0.187	1.347	0.186	0.857	80	580	100	11859	11447	-2.394	1896	9963	1860	9587	152707
3	22	22	AlexaAntiMouseAb~N/A	HA20457~B03R22C22	15850	6920	110	1944	1660	857	51	47	47	49	17	34	93	93	0	6828	6726	809	12	130	130	143	53	37	100	100	0	0.283	0.245	0.263	0.165	4.531	0.244	0.692	80	611	100	8595	8209	-1.820	1897	6698	1613	6596	132770
9	20	16	Hs~Ref:NM_139168.1~uORF:IOH37855~RFU:5848.25	HA20457~B09R16C20	6530	14730	110	1942	2169	1011	46	52	52	379	658	173	98	82	0	1063	1026	118	11	94	94	125	69	55	100	100	0	1.950	2.271	1.969	2.075	1.626	5.907	0.309	80	545	100	2859	3049	0.964	1890	969	2117	932	173525
43	6	18	Hs~MGC:BC020972.1~N/A~RFU:35848.21	HA20457~B43R18C06	12910	51110	110	1939	2003	403	20	47	47	89	122	137	100	100	0	1351	1359	77	5	156	156	189	71	37	100	100	0	1.583	1.626	1.637	1.593	1.270	1.728	0.816	80	564	100	3087	3159	0.663	1892	1195	1956	1203	160203
5	6	10	Hs~MGC:BC026039.1~uORF:IOH40656~RFU:36796.94	HA20457~B05R10C06	3680	9080	110	1937	1885	681	36	47	47	64	97	151	100	100	0	1056	1037	104	10	97	97	113	93	82	100	100	0	1.971	1.955	2.042	1.812	1.533	2.427	0.636	80	566	100	2849	2778	0.979	1890	959	1838	940	150782
10	21	22	AlexaAntiMouseAb~N/A	HA20457~B10R22C21	11190	15920	110	1935	1920	719	37	49	49	73	76	104	98	96	0	6917	6412	1405	21	139	139	174	97	55	100	100	0	0.278	0.298	0.305	0.264	1.981	0.296	0.854	80	599	100	8664	8144	-1.846	1886	6778	1871	6273	153587
30	4	19	Hs~MGC:BC063275.1~uORF:IOH40423~RFU:8638.39	HA20457~B30R19C04	7910	37870	110	1934	1942	543	27	48	48	66	108	163	100	100	0	1350	1361	171	12	117	117	125	49	39	100	100	0	1.530	1.523	1.530	1.471	1.395	1.676	0.792	80	548	100	3119	3138	0.613	1886	1233	1894	1244	155367
47	21	4	Hs~Ref:NM_005659.1~uORF:IOH4744~RFU:40891.93	HA20457~B47R04C21	15970	52820	110	1931	2134	778	36	54	54	308	367	119	100	97	0	716	713	21	2	218	218	388	271	69	100	1	0	3.769	4.202	3.870	3.931	1.458	5.387	0.403	80	580	100	2375	2575	1.914	1877	498	2080	495	170709
46	4	21	Hs~Ref:NM_017528.2~uORF:IOH40629~RFU:10491.07	HA20457~B46R21C04	8040	56250	110	1929	2001	642	32	47	47	52	31	59	100	100	0	2083	1956	307	15	217	217	231	49	21	100	100	0	1.009	1.124	1.034	1.095	1.339	1.239	0.829	80	584	100	3748	3693	0.012	1882	1866	1954	1739	160082
20	4	12	Hs~MGC:BC000877.1~uORF:IOH3268~RFU:6348.25	HA20457~B20R12C04	16850	22890	110	1918	1846	569	30	48	48	57	79	138	100	100	0	1325	1281	191	14	86	86	93	57	61	100	100	0	1.509	1.505	1.514	1.441	1.417	1.717	0.751	80	574	100	3109	2993	0.594	1870	1239	1798	1195	147702
43	14	17	Hs~Ref:NM_003092.3~uORF:IOH21977~RFU:26410.9	HA20457~B43R17C14	14500	50900	110	1910	1906	768	40	47	47	54	30	55	100	100	0	958	890	212	23	173	173	180	35	19	98	98	0	2.373	2.593	2.312	2.633	2.214	3.065	0.761	80	558	100	2648	2576	1.247	1863	785	1859	717	152514
6	21	2	Hs~Ref:NM_000992.2~uORF:IOH1702~RFU:10438.86	HA20457~B06R02C21	11180	7450	110	1908	2075	591	28	47	47	51	33	64	100	100	0	1815	1775	258	14	113	113	148	103	69	100	100	0	1.093	1.220	1.134	1.185	1.333	1.309	0.818	80	559	100	3563	3690	0.129	1861	1702	2028	1662	165963
37	22	22	AlexaAntiMouseAb~N/A	HA20457~B37R22C22	7080	47460	110	1907	1614	949	58	49	49	97	133	137	86	80	0	7227	6065	2359	38	175	175	271	167	61	97	96	0	0.263	0.266	0.279	0.206	3.029	0.262	0.763	80	592	100	8910	7455	-1.924	1858	7052	1565	5890	129124
8	22	22	AlexaAntiMouseAb~N/A	HA20457~B08R22C22	20380	11370	110	1906	1825	868	47	47	47	49	11	22	100	100	0	6401	6177	762	12	177	177	216	83	38	100	100	0	0.299	0.296	0.298	0.246	1.946	0.307	0.766	80	610	100	8083	7778	-1.743	1859	6224	1778	6000	145987
26	15	17	Hs~Ref:NM_001412.2~uORF:IOH3055~RFU:8125	HA20457~B26R17C15	10120	32970	110	1905	2000	620	31	49	49	78	93	119	100	100	0	2661	2749	402	14	125	125	187	207	110	100	100	0	0.732	0.744	0.715	0.715	1.359	0.710	0.795	80	557	100	4392	4575	-0.450	1856	2536	1951	2624	159997
23	7	12	Hs~MGC:BC032347.1~uORF:IOH21704~RFU:50242.75	HA20457~B23R12C07	12960	27450	110	1904	1986	721	36	52	52	185	247	133	100	100	0	1718	1743	206	11	178	178	222	120	54	100	100	0	1.203	1.236	1.169	1.155	1.463	1.408	0.694	80	568	100	3392	3499	0.266	1852	1540	1934	1565	158858
30	22	16	Hs~MGC:BC018906.2~uORF:IOH57152~RFU:23660.48	HA20457~B30R16C22	11510	37250	110	1903	2157	1263	58	47	47	72	126	175	100	100	0	566	564	76	13	107	107	128	150	117	100	96	0	4.044	4.617	4.272	3.873	2.180	7.215	0.167	80	589	100	2315	2567	2.016	1856	459	2110	457	172548
27	22	22	AlexaAntiMouseAb~N/A	HA20457~B27R22C22	16030	33910	110	1902	2059	703	34	47	47	56	39	69	100	100	0	6598	6038	1501	24	121	121	141	49	34	100	100	0	0.286	0.340	0.341	0.341	1.469	0.334	0.875	80	612	100	8332	7929	-1.804	1855	6477	2012	5917	164696
4	1	11	AlexaAntiMouseAb~N/A	HA20457~B04R11C01	16190	4720	110	1902	1868	762	40	47	47	58	42	72	100	100	0	9730	9356	1624	17	158	158	192	99	51	100	100	0	0.194	0.198	0.195	0.179	1.635	0.191	0.750	80	588	100	11427	11019	-2.367	1855	9572	1821	9198	149446
45	17	14	Hs~Ref:NM_030952.1~uORF:IOH21129~RFU:13705.24	HA20457~B45R14C17	6100	54840	110	1901	1865	804	43	46	46	52	39	75	100	98	0	674	662	126	19	186	186	192	33	17	100	100	0	3.801	3.821	3.836	3.479	1.557	4.317	0.839	80	567	100	2343	2295	1.926	1855	488	1819	476	149207
45	10	18	Hs~MGC:BC000190.1~uORF:IOH4410~RFU:10366.44	HA20457~B45R18C10	4700	55650	110	1897	1876	551	29	48	48	65	60	92	100	100	0	1242	1205	145	12	185	185	197	36	18	100	100	0	1.749	1.792	1.831	1.733	1.361	1.936	0.792	80	567	100	2906	2848	0.807	1849	1057	1828	1020	150108
11	22	22	AlexaAntiMouseAb~N/A	HA20457~B11R22C22	15910	15860	110	1897	1771	555	31	47	47	48	4	8	100	100	0	6168	5873	865	14	100	100	151	96	63	100	100	0	0.305	0.299	0.314	0.283	1.447	0.293	0.859	80	612	100	7918	7497	-1.714	1850	6068	1724	5773	141648
45	10	4	Hs~Ref:NM_000984.2~uORF:IOH13591~RFU:23497.95	HA20457~B45R04C10	4680	52850	110	1895	1961	477	24	78	78	197	211	107	100	100	0	2740	2639	307	11	324	324	292	87	29	100	100	0	0.752	0.813	0.799	0.794	1.222	0.758	0.837	80	528	100	4233	4198	-0.411	1817	2416	1883	2315	156868
45	18	3	Hs~Ref:NM_012396.1~uORF:IOH12626~RFU:35751.49	HA20457~B45R03C18	6280	52640	110	1894	1895	662	34	53	53	155	257	165	100	100	0	1204	1257	189	15	257	257	257	101	39	100	100	0	1.944	1.842	1.802	1.749	1.482	1.892	0.723	80	555	100	2788	2842	0.959	1841	947	1842	1000	151614
20	13	5	Hs~Ref:NM_006607.1~uORF:IOH40244~RFU:29264.19	HA20457~B20R05C13	18640	21480	110	1894	1871	647	34	51	51	108	158	146	100	100	0	1294	1303	122	9	145	145	145	37	25	100	100	0	1.604	1.572	1.621	1.468	1.503	1.855	0.709	80	576	100	2992	2978	0.682	1843	1149	1820	1158	149718
14	2	11	AlexaAntiMouseAb~N/A	HA20457~B14R11C02	7380	18240	110	1894	1860	726	39	50	50	94	105	111	98	96	0	8444	8164	1055	12	206	206	213	104	48	100	100	0	0.224	0.227	0.228	0.204	1.733	0.227	0.834	80	558	100	10082	9768	-2.159	1844	8238	1810	7958	148817
33	21	22	AlexaAntiMouseAb~N/A	HA20457~B33R22C21	6850	42910	110	1890	1764	1067	60	48	48	63	78	123	88	87	0	7649	6394	2537	39	208	208	311	305	98	98	93	0	0.248	0.277	0.245	0.177	3.319	0.289	0.864	80	578	100	9283	7902	-2.014	1842	7441	1716	6186	141138
37	2	20	Hs~Ref:NM_004965.3~uORF:IOH4772~RFU:14927.46	HA20457~B37R20C02	3070	47080	110	1888	1941	577	29	140	140	342	388	113	100	97	0	2380	2387	267	11	347	347	411	224	54	100	100	0	0.860	0.883	0.887	0.842	1.479	0.911	0.653	80	573	100	3781	3841	-0.218	1748	2033	1801	2040	155277
40	18	19	Hs~MGC:BC000288.1~uORF:IOH3404~RFU:22287.02	HA20457~B40R19C18	19810	46830	110	1887	1825	505	27	47	47	57	62	108	100	100	0	1673	1652	165	9	108	108	113	25	22	100	100	0	1.176	1.152	1.177	1.108	1.393	1.231	0.832	80	547	100	3405	3322	0.234	1840	1565	1778	1544	145991
26	5	17	Hs~Ref:NM_006713.2~uORF:IOH14686~RFU:18028.27	HA20457~B26R17C05	8110	32970	110	1884	1764	764	43	47	47	79	171	216	96	92	0	1224	1162	227	19	125	125	128	25	19	100	100	0	1.672	1.656	1.608	1.362	2.346	2.042	0.828	80	498	100	2936	2754	0.741	1837	1099	1717	1037	141137
27	1	14	Hs~Ref:NM_001697.1~uORF:IOH13236~RFU:46787.12	HA20457~B27R14C01	11830	32340	110	1883	1955	795	40	48	48	59	50	84	100	100	0	1114	1110	66	5	104	104	119	51	42	100	100	0	1.817	1.896	1.871	1.755	1.465	2.209	0.734	80	590	100	2845	2913	0.861	1835	1010	1907	1006	156368
21	11	19	Hs~Ref:NM_080416.1~uORF:IOH10603~RFU:21496.72	HA20457~B21R19C11	4800	28870	110	1883	1927	763	39	47	47	49	17	34	100	100	0	382	385	47	12	160	160	165	32	19	98	97	0	8.270	8.356	8.084	7.911	1.463	9.772	0.644	80	562	100	2058	2105	3.048	1836	222	1880	225	154137
31	1	13	Hs~MGC:BC038713.1~uORF:IOH27724~RFU:12669.27	HA20457~B31R13C01	11800	36630	110	1881	1837	477	25	47	47	59	89	150	100	100	0	461	478	46	9	105	105	108	22	20	100	100	0	5.152	4.799	4.730	4.650	1.329	5.652	0.825	80	589	100	2190	2163	2.365	1834	356	1790	373	146997
30	22	22	AlexaAntiMouseAb~N/A	HA20457~B30R22C22	11500	38450	110	1879	1587	900	56	48	48	65	73	112	90	87	0	7314	6223	2341	37	165	165	235	132	56	100	97	0	0.256	0.254	0.255	0.179	3.126	0.267	0.831	80	592	100	8980	7597	-1.965	1831	7149	1539	6058	126946
5	21	22	AlexaAntiMouseAb~N/A	HA20457~B05R22C21	6700	11470	110	1878	1803	520	28	48	48	69	89	128	100	100	0	6928	6747	858	12	152	152	196	102	52	100	100	0	0.270	0.266	0.278	0.256	1.394	0.256	0.829	80	597	100	8606	8350	-1.889	1830	6776	1755	6595	144256
21	22	22	AlexaAntiMouseAb~N/A	HA20457~B21R22C22	7000	29440	110	1877	1903	720	37	47	47	55	48	87	100	100	0	6732	6405	1110	17	144	144	152	37	24	100	100	0	0.278	0.296	0.285	0.276	1.407	0.297	0.867	80	602	100	8418	8117	-1.848	1830	6588	1856	6261	152227
23	11	18	Hs~Ref:NM_012199.2~uORF:IOH55724~RFU:3210.7	HA20457~B23R18C11	13760	28630	110	1876	1781	637	35	52	52	181	219	120	100	100	0	514	509	93	18	154	154	259	201	77	98	36	0	5.067	4.870	4.791	4.657	1.507	5.527	0.561	80	589	100	2184	2084	2.341	1824	360	1729	355	142447
3	1	11	AlexaAntiMouseAb~N/A	HA20457~B03R11C01	11640	4730	110	1873	1881	521	27	48	48	54	36	66	100	100	0	9185	8713	1557	17	132	132	165	85	51	100	100	0	0.202	0.214	0.218	0.205	1.586	0.198	0.807	80	589	100	10878	10414	-2.310	1825	9053	1833	8581	150496
35	22	22	AlexaAntiMouseAb~N/A	HA20457~B35R22C22	16060	42890	110	1873	1858	668	35	46	46	47	3	6	100	100	0	7187	6733	1642	24	146	146	159	53	33	100	100	0	0.259	0.275	0.267	0.269	1.705	0.260	0.825	80	622	100	8868	8399	-1.946	1827	7041	1812	6587	148671
12	15	8	Hs~MGC:BC022471.1~uORF:IOH11199~RFU:13463.97	HA20457~B12R08C15	19010	13090	110	1871	1910	594	31	48	48	53	32	60	100	100	0	1385	1348	200	14	90	90	93	16	17	100	100	0	1.408	1.480	1.400	1.406	1.503	1.632	0.824	80	569	100	3118	3120	0.493	1823	1295	1862	1258	152809
1	19	3	Hs~Ref:NM_004865.2~uORF:IOH10084~RFU:5025.11	HA20457~B01R03C19	6240	3160	110	1871	1869	642	34	47	47	49	17	34	100	100	0	1530	1468	288	19	111	111	113	13	11	100	100	0	1.285	1.343	1.426	1.278	1.545	1.453	0.766	80	548	100	3243	3179	0.362	1824	1419	1822	1357	149534
36	2	5	Hs~Ref:NM_152757.1~uORF:IOH43336~RFU:25232.53	HA20457~B36R05C02	16620	39480	110	1871	1817	657	36	47	47	48	20	41	100	100	0	736	879	573	65	140	140	170	61	35	98	98	0	3.060	2.395	2.653	2.612	1.884	2.504	0.517	80	558	100	2420	2509	1.614	1824	596	1770	739	145360
4	15	16	Hs~Ref:NM_014473.2~uORF:IOH9851~RFU:21110.26	HA20457~B04R16C15	19000	5710	110	1870	1979	547	27	53	53	223	300	134	100	100	0	2251	2300	206	8	234	234	315	229	72	100	100	0	0.901	0.932	0.907	0.898	1.320	0.775	0.598	80	566	100	3834	3992	-0.151	1817	2017	1926	2066	158322
20	1	12	Hs~MGC:BC018137.1~uORF:IOH10369~RFU:29487.99	HA20457~B20R12C01	16250	22890	110	1868	1998	811	40	54	54	144	175	121	100	100	0	1793	1776	74	4	209	209	207	71	34	100	100	0	1.145	1.241	1.189	1.124	1.600	1.404	0.699	80	590	100	3398	3511	0.196	1814	1584	1944	1567	159814
39	22	22	AlexaAntiMouseAb~N/A	HA20457~B39R22C22	16070	47400	110	1868	1956	987	50	47	47	51	30	58	97	97	0	7071	6321	1808	28	145	145	190	90	47	100	100	0	0.263	0.309	0.290	0.257	2.269	0.307	0.778	80	590	100	8747	8085	-1.927	1821	6926	1909	6176	156487
39	18	8	Hs~Ref:NM_006590.2~uORF:IOH45672~RFU:44583.33	HA20457~B39R08C18	15260	44630	110	1868	1866	469	25	316	316	452	451	99	100	92	0	977	1439	2659	184	355	355	348	189	54	100	100	0	2.495	1.430	2.609	2.076	2.167	0.074	0.023	80	546	100	2174	2634	1.319	1552	622	1550	1084	149286
2	16	19	Hs~Ref:NM_001966.2~uORF:IOH62346~RFU:21431.22	HA20457~B02R19C16	10170	6360	110	1868	1832	496	27	48	48	52	26	50	100	100	0	2037	1929	297	15	106	106	118	35	29	100	100	0	0.943	0.979	1.010	0.950	1.348	0.958	0.837	80	547	100	3751	3607	-0.085	1820	1931	1784	1823	146533
47	21	22	AlexaAntiMouseAb~N/A	HA20457~B47R22C21	15980	56410	110	1868	1807	1011	55	46	46	58	66	113	92	92	0	6501	5875	1666	28	187	187	225	92	40	100	100	0	0.289	0.310	0.301	0.196	4.141	0.326	0.839	80	581	100	8136	7449	-1.793	1822	6314	1761	5688	144525
11	10	17	Hs~Ref:NM_012341.2~uORF:IOH26105~RFU:10811.14	HA20457~B11R17C10	13490	14880	110	1867	1985	689	34	47	47	67	135	201	100	100	0	2056	2022	132	6	92	92	98	27	27	100	100	0	0.927	1.004	0.970	0.948	1.423	1.139	0.789	80	566	100	3784	3868	-0.110	1820	1964	1938	1930	158835
48	10	14	Hs~MGC:NM_015014.1~uORF:IOH23193~RFU:3345.42	HA20457~B48R14C10	18310	54830	110	1866	1911	591	30	48	48	69	68	98	100	100	0	1195	1163	265	22	177	177	198	50	25	100	100	0	1.786	1.889	1.790	1.901	1.513	2.054	0.830	80	556	100	2836	2849	0.837	1818	1018	1863	986	152917
28	21	2	Hs~Ref:NM_014047.1~uORF:IOH11187~RFU:34852.62	HA20457~B28R02C21	20310	29860	110	1865	1996	585	29	49	49	67	69	102	100	100	0	1261	1292	140	10	127	127	132	50	37	100	100	0	1.601	1.671	1.628	1.608	1.383	1.851	0.726	80	559	100	2950	3112	0.679	1816	1134	1947	1165	159697
47	19	22	ERa~N/A	HA20457~B47R22C19	15580	56430	110	1865	1924	575	29	49	49	96	118	122	100	100	0	1138	1160	125	10	192	192	202	59	29	100	100	0	1.920	1.937	1.834	1.856	1.380	2.148	0.764	80	606	100	2762	2843	0.941	1816	946	1875	968	153892
33	2	12	Hs~Ref:NM_002136.1~uORF:IOH3526~RFU:14228.98	HA20457~B33R12C02	3050	40940	110	1865	1884	709	37	50	50	146	206	141	100	100	0	2157	2179	192	8	266	266	282	94	33	100	100	0	0.960	0.959	0.971	0.881	1.478	0.888	0.711	80	548	100	3706	3747	-0.059	1815	1891	1834	1913	150686
21	15	2	Hs~Ref:NM_145010.1~uORF:IOH10871~RFU:50942.15	HA20457~B21R02C15	5570	25440	110	1864	1970	563	28	48	48	189	368	194	100	97	0	1819	1842	78	4	103	103	250	356	142	100	100	0	1.058	1.105	1.093	1.055	1.373	1.310	0.768	80	558	100	3532	3661	0.082	1816	1716	1922	1739	157602
20	1	11	AlexaAntiMouseAb~N/A	HA20457~B20R11C01	16250	22690	110	1862	1874	750	40	49	49	56	40	71	100	100	0	7397	7253	443	6	131	131	137	47	34	100	100	0	0.250	0.256	0.244	0.231	1.629	0.256	0.783	80	580	100	9079	8947	-2.003	1813	7266	1825	7122	149899
33	22	22	AlexaAntiMouseAb~N/A	HA20457~B33R22C22	7060	42910	110	1860	1825	939	51	48	48	55	54	98	96	96	0	7786	7199	1598	22	149	149	253	164	64	100	100	0	0.237	0.252	0.242	0.194	2.478	0.264	0.821	80	610	100	9449	8827	-2.075	1812	7637	1777	7050	145961
37	21	22	AlexaAntiMouseAb~N/A	HA20457~B37R22C21	6890	47480	110	1860	1743	789	45	50	50	127	168	132	98	97	0	7447	7030	1250	17	239	239	284	150	52	100	100	0	0.251	0.249	0.268	0.218	1.979	0.233	0.705	80	598	100	9018	8484	-1.994	1810	7208	1693	6791	139477
5	5	16	Hs~N/A:NM_006206.3~CAT:PV4680~RFU:4571.24	HA20457~B05R16C05	3490	10280	110	1859	2181	911	41	46	46	47	8	17	100	100	0	373	375	60	16	90	90	94	36	38	100	100	0	6.406	7.491	6.815	6.995	1.509	9.013	0.767	80	576	100	2096	2420	2.680	1813	283	2135	285	174453
46	5	12	Hs~Ref:NM_015933.1~uORF:IOH3769~RFU:7998.51	HA20457~B46R12C05	8210	54460	110	1859	1828	832	45	87	87	497	655	131	87	66	0	2325	2270	384	16	306	306	514	392	76	100	98	0	0.878	0.886	0.873	0.768	1.771	1.033	0.512	80	543	100	3791	3705	-0.188	1772	2019	1741	1964	146245
40	17	7	Hs~Ref:NM_004217.1~N/A~RFU:32006.55	HA20457~B40R07C17	19590	44400	110	1854	1825	559	30	47	47	52	53	101	100	100	0	1649	1711	162	9	109	109	116	44	37	100	100	0	1.173	1.110	1.190	1.049	1.536	1.142	0.674	80	576	100	3347	3380	0.231	1807	1540	1778	1602	146010
10	22	22	AlexaAntiMouseAb~N/A	HA20457~B10R22C22	11390	15930	110	1853	1766	780	44	48	48	52	25	48	98	98	0	7035	6430	1536	23	104	104	164	110	67	100	100	0	0.260	0.272	0.274	0.230	2.042	0.281	0.863	80	628	100	8736	8044	-1.941	1805	6931	1718	6326	141250
27	21	22	AlexaAntiMouseAb~N/A	HA20457~B27R22C21	15830	33910	110	1848	1894	907	47	46	46	47	7	14	100	100	0	6762	6218	1377	22	117	117	144	64	44	100	100	0	0.271	0.303	0.300	0.271	1.679	0.306	0.814	80	590	100	8447	7949	-1.883	1802	6645	1848	6101	151519
24	12	16	Hs~Ref:NM_001025092.1~uORF:IOH63097~RFU:16924.67	HA20457~B24R16C12	18490	28210	110	1846	1887	727	38	48	48	62	66	106	100	100	0	1155	1149	195	16	92	92	99	27	27	100	100	0	1.691	1.740	1.750	1.567	1.759	2.092	0.742	80	577	100	2861	2896	0.758	1798	1063	1839	1057	150980
2	1	1	AlexaAntiMouseAb~N/A	HA20457~B02R01C01	7140	2800	110	1846	1592	1124	70	46	46	86	246	286	71	71	0	11638	8530	5077	59	132	132	230	478	207	98	78	0	0.156	0.184	0.174	0.096	4.224	0.190	0.801	80	600	100	13306	9944	-2.676	1800	11506	1546	8398	127384
13	20	9	Hs~MGC:BC015586.2~uORF:IOH46065~RFU:10789.3	HA20457~B13R09C20	6540	17860	110	1844	2013	720	35	49	49	67	59	88	100	100	0	1204	1159	161	13	112	112	146	67	45	100	100	0	1.644	1.876	1.663	1.785	1.467	2.231	0.762	80	560	100	2887	3011	0.717	1795	1092	1964	1047	161023
5	4	14	Hs~MGC:BC052966.1~uORF:IOH28846~RFU:12468.38	HA20457~B05R14C04	3280	9880	110	1844	1912	510	26	50	50	79	103	130	100	100	0	1303	1291	94	7	160	160	168	47	27	100	100	0	1.570	1.646	1.674	1.584	1.332	1.807	0.753	80	585	100	2937	2993	0.650	1794	1143	1862	1131	152927
43	18	6	Hs~MGC:BC064593.1~uORF:IOH39933~RFU:16431.36	HA20457~B43R06C18	15270	48690	110	1842	1570	810	51	56	56	2146	3832	178	0	0	0	423	417	57	13	125	125	151	56	37	100	98	0	5.993	5.185	5.347	3.810	2.648	56.962	0.071	80	554	100	2084	1806	2.583	1786	298	1514	292	125628
20	16	5	Hs~Ref:NM_148912.2~uORF:IOH40097~RFU:35055.8	HA20457~B20R05C16	19250	21480	110	1841	1898	789	41	49	49	98	144	146	100	100	0	697	692	59	8	98	98	140	84	60	100	100	0	2.992	3.113	2.847	2.850	1.549	3.988	0.622	80	557	100	2391	2443	1.581	1792	599	1849	594	151835
27	4	19	Hs~MGC:BC064840.1~uORF:IOH40500~RFU:30425.04	HA20457~B27R19C04	12430	33340	110	1840	2090	749	35	47	47	58	58	100	100	100	0	719	828	599	72	100	100	107	24	22	100	100	0	2.897	2.806	2.913	2.896	1.457	2.758	0.544	80	558	100	2412	2771	1.534	1793	619	2043	728	167190
41	9	9	Hs~Ref:NM_138779.1~uORF:IOH10711~RFU:30067.89	HA20457~B41R09C09	4530	49390	110	1840	1699	533	31	50	50	103	109	105	100	100	0	1359	1359	131	9	257	257	247	60	24	100	100	0	1.624	1.496	1.560	1.416	1.462	1.560	0.804	80	552	100	2892	2751	0.700	1790	1102	1649	1102	135933
15	17	3	Hs~MGC:BC022361.1~uORF:IOH14170~RFU:18963.97	HA20457~B15R03C17	14950	16590	110	1839	1836	675	36	51	51	113	129	114	100	100	0	2140	2146	132	6	114	114	144	66	45	100	100	0	0.883	0.878	0.843	0.815	1.489	0.919	0.742	80	555	100	3814	3817	-0.180	1788	2026	1785	2032	146902
47	7	8	Hs~MGC:BC010876.1~uORF:IOH9862~RFU:7737.99	HA20457~B47R08C07	13170	53620	110	1837	2044	929	45	46	46	47	13	27	100	100	0	1027	982	128	13	171	171	174	19	10	100	100	0	2.092	2.464	2.415	2.230	1.647	3.163	0.686	80	550	100	2647	2809	1.065	1791	856	1998	811	163548
26	6	17	Hs~Ref:NM_006713.2~uORF:IOH14686~RFU:18160.34	HA20457~B26R17C06	8310	32970	110	1837	1730	782	45	47	47	93	204	219	95	95	0	1315	1227	240	19	161	161	198	95	47	100	100	0	1.551	1.579	1.617	1.256	2.373	1.929	0.799	80	501	100	2944	2749	0.633	1790	1154	1683	1066	138416
29	21	22	AlexaAntiMouseAb~N/A	HA20457~B29R22C21	6870	38420	110	1836	1807	707	39	49	49	80	83	103	96	96	0	7529	7063	1308	18	260	260	272	102	37	100	100	0	0.246	0.258	0.257	0.216	2.270	0.262	0.861	80	580	100	9056	8561	-2.024	1787	7269	1758	6803	144529
37	3	20	Hs~MGC:BC001132.1~uORF:IOH3853~RFU:16130.95	HA20457~B37R20C03	3290	47090	110	1831	1755	409	23	80	80	183	255	139	100	100	0	2659	2613	204	7	308	308	342	130	38	100	100	0	0.745	0.727	0.760	0.704	1.288	0.715	0.756	80	592	100	4102	3980	-0.425	1751	2351	1675	2305	140363
37	13	14	Hs~MGC:NM_178588.1~uORF:IOH13592~RFU:7347.47	HA20457~B37R14C13	5290	45880	110	1828	1843	808	43	46	46	47	7	14	100	100	0	425	407	58	14	144	144	147	18	12	100	100	0	6.342	6.833	6.950	6.232	1.505	8.016	0.797	80	586	100	2063	2060	2.665	1782	281	1797	263	147479
7	3	13	Hs~Ref:NM_006912.3~uORF:IOH29584~RFU:24274.02	HA20457~B07R13C03	12120	9640	110	1827	1864	652	34	48	48	87	111	127	100	100	0	2195	2350	855	36	105	105	157	102	64	100	100	0	0.851	0.809	0.903	0.788	1.569	0.746	0.652	80	516	100	3869	4061	-0.232	1779	2090	1816	2245	149112
44	22	22	AlexaAntiMouseAb~N/A	HA20457~B44R22C22	20640	51880	110	1827	1740	692	39	46	46	46	2	4	100	100	0	6823	6577	1069	16	124	124	128	23	17	100	100	0	0.266	0.263	0.265	0.238	1.614	0.263	0.829	80	612	100	8480	8147	-1.911	1781	6699	1694	6453	139168
16	19	5	Hs~Ref:NM_003521.2~uORF:IOH40169~RFU:22253.28	HA20457~B16R05C19	19870	17010	110	1824	1823	605	33	54	54	153	357	233	100	100	0	1780	1747	217	12	195	195	188	115	61	100	100	0	1.117	1.140	1.137	1.084	1.473	1.226	0.681	80	576	100	3355	3321	0.159	1770	1585	1769	1552	145848
8	18	8	Hs~MGC:BC033677.1~uORF:IOH40219~RFU:10872.27	HA20457~B08R08C18	19580	8570	110	1823	1952	484	24	47	47	64	78	121	100	100	0	1623	1581	156	9	130	130	136	29	21	100	100	0	1.190	1.313	1.292	1.280	1.313	1.436	0.812	80	564	100	3269	3356	0.250	1776	1493	1905	1451	156124
11	21	22	AlexaAntiMouseAb~N/A	HA20457~B11R22C21	15710	15860	110	1819	1783	535	30	47	47	55	42	76	100	100	0	6008	6006	540	8	112	112	166	94	56	100	100	0	0.301	0.295	0.301	0.272	1.623	0.285	0.819	80	592	100	7668	7630	-1.734	1772	5896	1736	5894	142640
16	16	9	Hs~Ref:NM_201998.1~uORF:IOH56887~RFU:45456.33	HA20457~B16R09C16	19270	17810	110	1818	1805	491	27	48	48	146	270	184	100	100	0	1080	1160	327	28	103	103	140	88	62	100	100	0	1.812	1.662	1.744	1.639	1.423	1.582	0.585	80	574	100	2747	2814	0.857	1770	977	1757	1057	144417
40	17	19	Hs~MGC:BC000288.1~uORF:IOH3404~RFU:22087.98	HA20457~B40R19C17	19610	46830	110	1817	1842	687	37	47	47	53	38	71	100	100	0	1721	1745	312	17	106	106	110	25	22	100	100	0	1.096	1.095	1.031	1.020	1.513	1.218	0.769	80	558	100	3385	3434	0.132	1770	1615	1795	1639	147334
3	21	22	AlexaAntiMouseAb~N/A	HA20457~B03R22C21	15660	6920	110	1817	1632	743	45	48	48	63	79	125	100	100	0	6960	6444	1562	24	109	109	134	66	49	100	100	0	0.258	0.250	0.257	0.227	2.089	0.225	0.700	80	590	100	8620	7919	-1.953	1769	6851	1584	6335	130593
20	15	5	Hs~Ref:NM_148912.2~uORF:IOH40097~RFU:37155.02	HA20457~B20R05C15	19050	21480	110	1815	1964	588	29	56	56	155	233	150	100	100	0	715	728	95	13	188	188	179	85	47	100	100	0	3.338	3.533	3.436	3.428	1.322	3.832	0.694	80	575	100	2286	2448	1.739	1759	527	1908	540	157127
12	13	18	Hs~MGC:BC032662.1~uORF:IOH21986~RFU:29355.9	HA20457~B12R18C13	18640	15110	110	1815	1929	625	32	50	50	149	196	131	100	100	0	924	924	78	8	114	114	147	88	59	100	100	0	2.179	2.320	2.201	2.219	1.332	2.731	0.736	80	577	100	2575	2689	1.124	1765	810	1879	810	154288
46	18	13	Hs~Ref:NM_023080.1~uORF:IOH13369~RFU:9438.24	HA20457~B46R13C18	10830	54640	110	1815	1784	509	28	48	48	129	147	113	100	100	0	2354	2358	280	11	210	210	242	75	30	100	100	0	0.824	0.808	0.836	0.776	1.506	0.813	0.661	80	556	100	3911	3884	-0.279	1767	2144	1736	2148	142722
48	22	17	Hs~MGC:BC000522.1~uORF:IOH3622~RFU:36648.47	HA20457~B48R17C22	20710	55420	110	1814	1864	517	27	53	53	353	434	122	100	100	0	1131	1150	123	10	179	179	301	211	70	100	100	0	1.850	1.865	1.850	1.805	1.440	2.294	0.613	80	580	100	2713	2782	0.887	1761	952	1811	971	149121
25	1	11	AlexaAntiMouseAb~N/A	HA20457~B25R11C01	2780	31760	110	1814	1746	1030	58	48	48	54	31	57	92	92	0	8739	7335	2954	40	140	140	232	158	68	100	98	0	0.205	0.236	0.228	0.173	2.391	0.245	0.832	80	606	100	10365	8893	-2.284	1766	8599	1698	7195	139667
20	21	22	AlexaAntiMouseAb~N/A	HA20457~B20R22C21	20260	24880	110	1811	1660	749	45	49	49	61	66	108	96	96	0	6098	5787	1021	17	166	166	166	62	37	100	100	0	0.297	0.287	0.311	0.236	2.563	0.286	0.771	80	580	100	7694	7232	-1.751	1762	5932	1611	5621	132829
39	21	22	AlexaAntiMouseAb~N/A	HA20457~B39R22C21	15870	47410	110	1810	1788	928	51	48	48	66	103	156	93	92	0	6912	6403	1384	21	195	195	215	105	48	100	100	0	0.262	0.280	0.262	0.227	1.983	0.299	0.823	80	588	100	8479	7948	-1.931	1762	6717	1740	6208	143051
13	2	11	AlexaAntiMouseAb~N/A	HA20457~B13R11C02	2940	18300	110	1810	1492	960	64	47	47	51	34	66	88	85	0	8228	6839	3006	43	133	133	199	122	61	100	100	0	0.218	0.215	0.212	0.136	3.067	0.223	0.821	80	547	100	9858	8151	-2.199	1763	8095	1445	6706	119399
20	14	5	Hs~Ref:NM_006607.1~uORF:IOH40244~RFU:28891.92	HA20457~B20R05C14	18840	21480	110	1809	1850	630	34	55	55	148	246	166	100	100	0	1392	1363	75	5	150	150	158	64	40	100	100	0	1.412	1.480	1.487	1.399	1.388	1.656	0.707	80	574	100	2996	3008	0.498	1754	1242	1795	1213	147969
1	2	1	AlexaAntiMouseAb~N/A	HA20457~B01R01C02	2840	2770	110	1809	1572	799	50	47	47	47	4	8	98	97	0	9614	8934	2056	23	193	193	224	72	32	100	100	0	0.187	0.174	0.183	0.132	2.608	0.179	0.742	80	592	100	11183	10266	-2.419	1762	9421	1525	8741	125720
7	21	22	AlexaAntiMouseAb~N/A	HA20457~B07R22C21	15730	11420	110	1806	1725	608	35	47	47	61	91	149	100	100	0	6568	6285	768	12	125	125	166	104	62	100	100	0	0.273	0.272	0.278	0.255	1.484	0.267	0.784	80	615	100	8202	7838	-1.873	1759	6443	1678	6160	138017
48	13	16	Hs~Ref:NM_006925.2~uORF:IOH58606~RFU:6653.65	HA20457~B48R16C13	18900	55230	110	1806	1679	349	20	57	57	139	145	104	100	100	0	2179	2162	551	25	261	261	238	75	31	100	100	0	0.912	0.853	0.908	0.857	1.379	0.747	0.718	80	544	100	3667	3523	-0.133	1749	1918	1622	1901	134306
40	2	16	Hs~IVGN:NM_001206389~CAT_PHG0184~N/A	HA20457~B40R16C02	16600	46230	110	1805	1697	605	35	49	49	61	45	73	100	100	0	990	965	116	12	207	207	215	46	21	100	100	0	2.243	2.174	2.240	2.023	1.589	2.595	0.773	80	602	100	2539	2406	1.165	1756	783	1648	758	135736
2	15	19	Hs~Ref:NM_001966.2~uORF:IOH62346~RFU:20994.54	HA20457~B02R19C15	9970	6370	110	1796	1926	722	37	47	47	49	12	24	100	100	0	2023	1945	354	18	107	107	118	34	28	100	100	0	0.913	1.022	0.960	0.977	1.472	1.084	0.797	80	566	100	3665	3717	-0.132	1749	1916	1879	1838	154074
38	22	22	AlexaAntiMouseAb~N/A	HA20457~B38R22C22	11560	47420	110	1794	1808	865	47	48	48	56	41	73	98	98	0	7673	6761	1814	26	213	213	281	137	48	100	100	0	0.234	0.269	0.244	0.233	1.856	0.276	0.833	80	592	100	9206	8308	-2.095	1746	7460	1760	6548	144654
3	2	1	AlexaAntiMouseAb~N/A	HA20457~B03R01C02	11830	2730	110	1794	1788	797	44	48	48	57	48	84	98	96	0	11449	10874	2164	19	129	129	181	102	56	100	100	0	0.154	0.162	0.153	0.134	2.336	0.157	0.711	80	607	100	13066	12485	-2.697	1746	11320	1740	10745	143073
25	19	9	Hs~MGC:BC004876.1~uORF:IOH5626~RFU:38825.33	HA20457~B25R09C19	6390	31340	110	1793	1878	533	28	47	47	56	98	175	100	100	0	1603	1597	140	8	109	109	118	48	40	100	100	0	1.169	1.231	1.191	1.186	1.397	1.248	0.717	80	592	100	3240	3319	0.225	1746	1494	1831	1488	150241
42	22	22	AlexaAntiMouseAb~N/A	HA20457~B42R22C22	11600	51920	110	1791	1781	968	54	46	46	47	7	14	100	100	0	7739	7182	1565	21	189	189	191	30	15	100	100	0	0.231	0.248	0.241	0.185	2.433	0.265	0.777	80	610	100	9295	8728	-2.113	1745	7550	1735	6993	142462
43	5	18	Hs~MGC:BC020972.1~N/A~RFU:36257.44	HA20457~B43R18C05	12710	51100	110	1790	1822	468	25	52	52	111	126	113	100	100	0	1277	1269	121	9	241	241	222	76	34	100	100	0	1.678	1.722	1.727	1.674	1.330	1.782	0.722	80	558	100	2774	2798	0.746	1738	1036	1770	1028	145751
43	6	5	Hs~MGC:BC017212.2~uORF:IOH13041~RFU:11308.95	HA20457~B43R05C06	12890	48500	110	1790	1782	448	25	48	48	54	34	62	100	100	0	1362	1301	150	11	122	122	128	24	18	100	100	0	1.405	1.471	1.485	1.428	1.402	1.664	0.792	80	558	100	2982	2913	0.490	1742	1240	1734	1179	142538
10	22	3	Hs~MGC:BC009762.2~uORF:IOH14113~RFU:10764.51	HA20457~B10R03C22	11370	12110	110	1790	1743	545	31	48	48	58	44	75	100	100	0	1108	1088	97	8	103	103	137	63	45	100	100	0	1.733	1.721	1.666	1.638	1.367	1.944	0.810	80	577	100	2747	2680	0.794	1742	1005	1695	985	139406
48	14	16	Hs~Ref:NM_006925.2~uORF:IOH58606~RFU:6878.72	HA20457~B48R16C14	19100	55230	110	1786	1907	669	35	49	49	122	162	132	100	100	0	2308	2293	181	7	189	189	218	103	47	100	100	0	0.820	0.883	0.809	0.831	1.435	0.914	0.719	80	567	100	3856	3962	-0.287	1737	2119	1858	2104	152590
33	21	20	Hs~Ref:NM_016359.2~uORF:IOH45439~RFU:14498.91	HA20457~B33R20C21	6850	42520	110	1784	1872	634	33	47	47	55	69	125	100	100	0	2015	1994	119	5	136	136	138	15	10	100	100	0	0.924	0.982	0.969	0.929	1.398	1.075	0.777	80	546	100	3616	3683	-0.113	1737	1879	1825	1858	149758
6	17	19	Hs~Ref:NM_144602.1~uORF:IOH11852~RFU:8680.13	HA20457~B06R19C17	10390	10850	110	1784	1842	498	27	47	47	62	74	119	100	100	0	1565	1533	187	12	102	102	114	64	56	100	100	0	1.187	1.254	1.245	1.218	1.382	1.409	0.821	80	575	100	3200	3226	0.248	1737	1463	1795	1431	147367
22	2	12	Hs~Ref:NM_015640.1~uORF:IOH22934~RFU:26461.12	HA20457~B22R12C02	7430	27440	110	1784	1791	492	27	49	49	100	148	148	100	100	0	3051	3749	3805	101	134	134	224	237	105	100	100	0	0.595	0.482	0.563	0.530	1.636	0.202	0.321	80	565	100	4652	5357	-0.750	1735	2917	1742	3615	143282
13	4	20	Hs~Ref:NM_139169.2~uORF:IOH22254~RFU:37537.2	HA20457~B13R20C04	3360	20080	110	1779	1816	552	30	50	50	209	290	138	100	98	0	1571	1543	126	8	128	128	302	299	99	100	100	0	1.198	1.248	1.184	1.184	1.431	1.422	0.722	80	562	100	3172	3181	0.261	1729	1443	1766	1415	145301
5	5	10	Hs~MGC:BC026039.1~uORF:IOH40656~RFU:37243.45	HA20457~B05R10C05	3480	9070	110	1778	1910	685	35	47	47	55	46	83	100	100	0	1021	1015	70	6	98	98	111	64	57	100	100	0	1.875	2.032	2.010	1.879	1.572	2.392	0.678	80	577	100	2654	2780	0.907	1731	923	1863	917	152773
16	12	18	Hs~Ref:NM_012153.1~uORF:IOH26169~RFU:8112.45	HA20457~B16R18C12	18490	19610	110	1778	1673	484	28	48	48	48	13	27	100	100	0	694	673	114	16	78	78	80	15	18	100	100	0	2.808	2.731	2.976	2.642	1.537	3.078	0.807	80	563	100	2346	2220	1.490	1730	616	1625	595	133814
38	21	22	AlexaAntiMouseAb~N/A	HA20457~B38R22C21	11370	47420	110	1778	1646	648	39	47	47	48	6	12	100	100	0	7605	6658	2061	30	371	371	391	158	40	100	100	0	0.239	0.254	0.250	0.253	1.648	0.242	0.853	80	610	100	8965	7886	-2.063	1731	7234	1599	6287	131704
30	21	22	AlexaAntiMouseAb~N/A	HA20457~B30R22C21	11310	38460	110	1776	1853	823	44	48	48	54	37	68	98	98	0	7310	6845	1236	18	173	173	233	123	52	100	100	0	0.242	0.271	0.276	0.225	2.257	0.278	0.811	80	580	100	8865	8477	-2.046	1728	7137	1805	6672	148226
21	12	19	Hs~Ref:NM_080416.1~uORF:IOH10603~RFU:18911.57	HA20457~B21R19C12	4990	28850	110	1775	1715	591	34	47	47	49	19	38	100	100	0	417	423	41	9	163	163	166	21	12	100	100	0	6.803	6.415	6.687	6.071	1.543	7.677	0.674	80	575	100	1982	1928	2.766	1728	254	1668	260	137211
45	10	8	Hs~Ref:NM_002677.1~uORF:IOH27101~RFU:22069.38	HA20457~B45R08C10	4680	53650	110	1773	1861	552	29	48	48	75	98	130	100	100	0	1537	1525	144	9	217	217	233	71	30	100	100	0	1.307	1.386	1.361	1.330	1.326	1.524	0.738	80	575	100	3045	3121	0.386	1725	1320	1813	1308	148855
4	21	17	Hs~Ref:NM_004456.2~uORF:IOH9963~RFU:10188.86	HA20457~B04R17C21	20200	5880	110	1770	1715	613	35	49	49	72	85	118	98	98	0	913	835	221	26	304	304	309	118	38	88	85	0	2.826	3.137	2.985	3.774	2.198	3.304	0.735	80	545	100	2330	2197	1.499	1721	609	1666	531	137205
14	22	22	AlexaAntiMouseAb~N/A	HA20457~B14R22C22	11390	20430	110	1765	1525	785	51	49	49	51	15	29	95	95	0	6653	5996	1595	26	107	107	163	115	70	100	100	0	0.262	0.251	0.281	0.164	3.515	0.268	0.834	80	612	100	8262	7365	-1.932	1716	6546	1476	5889	121964
23	16	8	Hs~Ref:NM_201259.1~uORF:IOH45586~RFU:50039.06	HA20457~B23R08C16	14750	26620	110	1764	1892	653	34	49	49	88	139	157	100	100	0	1316	1320	90	6	136	136	163	102	62	100	100	0	1.453	1.557	1.494	1.467	1.455	1.784	0.715	80	585	100	2895	3027	0.539	1715	1180	1843	1184	151386
20	17	19	Hs~MGC:BC066938.1~uORF:IOH40083~RFU:35398.47	HA20457~B20R19C17	19460	24280	110	1764	1796	435	24	49	49	56	35	62	100	100	0	780	762	83	10	98	98	97	20	20	100	100	0	2.515	2.631	2.428	2.573	1.329	3.034	0.765	80	568	100	2397	2411	1.330	1715	682	1747	664	143666
42	1	15	Hs~MGC:BC012924.1~uORF:IOH11017~RFU:34638.65	HA20457~B42R15C01	7410	50560	110	1762	1966	799	40	50	50	175	566	323	100	80	0	514	514	53	10	180	180	207	73	35	100	100	0	5.126	5.737	5.521	5.305	1.540	7.145	0.654	80	569	100	2046	2250	2.358	1712	334	1916	334	157269
28	7	8	Hs~Ref:NM_005371.2~uORF:IOH4172~RFU:32811.57	HA20457~B28R08C07	17520	31080	110	1761	1950	756	38	146	146	301	374	124	100	93	0	1388	1372	76	5	374	374	311	192	61	100	100	0	1.593	1.808	1.619	1.652	1.627	2.341	0.552	80	530	100	2629	2802	0.671	1615	1014	1804	998	155960
19	2	19	Hs~Ref:NM_003512.3~uORF:IOH14485~RFU:17446.51	HA20457~B19R19C02	12000	24320	110	1760	1677	557	33	51	51	171	243	142	100	98	0	1876	1829	183	10	122	122	173	129	74	100	100	0	0.974	0.953	0.949	0.896	1.444	1.071	0.760	80	544	100	3463	3333	-0.037	1709	1754	1626	1707	134138
16	22	22	AlexaAntiMouseAb~N/A	HA20457~B16R22C22	20490	20410	110	1755	1537	675	43	48	48	49	11	22	100	100	0	5831	5596	805	14	99	99	126	60	47	100	100	0	0.298	0.271	0.304	0.236	1.701	0.278	0.824	80	611	100	7439	6986	-1.748	1707	5732	1489	5497	122973
45	22	22	AlexaAntiMouseAb~N/A	HA20457~B45R22C22	7090	56440	110	1751	1761	758	43	47	47	58	55	94	97	96	0	6854	6476	1274	19	299	299	330	149	45	100	100	0	0.260	0.277	0.260	0.233	2.044	0.283	0.855	80	598	100	8259	7891	-1.944	1704	6555	1714	6177	140847
12	12	6	Hs~Ref:NM_032636.2~uORF:IOH4088~RFU:40914.85	HA20457~B12R06C12	18420	12710	110	1751	1640	662	40	51	51	130	177	136	100	97	0	1857	1899	226	11	138	138	302	853	282	100	51	0	0.989	0.902	0.982	0.807	1.810	0.519	0.214	80	552	100	3419	3350	-0.016	1700	1719	1589	1761	131184
43	6	8	Hs~MGC:BC011885.1~uORF:IOH14206~RFU:18498.88	HA20457~B43R08C06	12880	49100	110	1750	1696	655	38	52	52	317	391	123	100	95	0	1191	1213	137	11	188	188	245	156	63	100	100	0	1.693	1.604	1.685	1.488	1.513	1.801	0.568	80	568	100	2701	2669	0.760	1698	1003	1644	1025	135718
15	21	22	AlexaAntiMouseAb~N/A	HA20457~B15R22C21	15770	20380	110	1747	1605	758	47	48	48	49	12	24	97	95	0	5616	5318	1185	22	103	103	143	75	52	100	100	0	0.308	0.299	0.311	0.218	2.969	0.312	0.840	80	580	100	7212	6772	-1.698	1699	5513	1557	5215	128421
16	15	9	Hs~Ref:NM_201998.1~uORF:IOH56887~RFU:45660.48	HA20457~B16R09C15	19080	17820	110	1746	1898	594	31	93	93	258	377	146	100	95	0	1105	1127	115	10	180	180	196	517	263	100	30	0	1.787	1.906	1.858	1.808	1.361	1.668	0.216	80	554	100	2578	2752	0.838	1653	925	1805	947	151850
41	2	11	AlexaAntiMouseAb~N/A	HA20457~B41R11C02	3130	49790	110	1746	1815	825	45	48	48	61	38	62	100	100	0	9796	9321	1351	14	391	391	428	122	28	100	100	0	0.181	0.198	0.182	0.176	1.596	0.200	0.801	80	574	100	11103	10697	-2.470	1698	9405	1767	8930	145239
23	21	22	AlexaAntiMouseAb~N/A	HA20457~B23R22C21	15770	29430	110	1745	1794	708	39	48	48	49	13	26	100	100	0	6590	6327	754	11	197	197	216	111	51	100	100	0	0.265	0.285	0.277	0.260	1.553	0.287	0.768	80	599	100	8090	7876	-1.914	1697	6393	1746	6130	143558
40	18	5	Hs~Ref:NM_001001330.1~uORF:IOH40137~RFU:12672.99	HA20457~B40R05C18	19780	44000	110	1745	1638	490	29	46	46	52	45	86	100	100	0	1287	1242	120	9	107	107	108	17	15	100	100	0	1.440	1.403	1.391	1.330	1.471	1.511	0.769	80	577	100	2879	2727	0.526	1699	1180	1592	1135	131013
41	22	22	AlexaAntiMouseAb~N/A	HA20457~B41R22C22	7150	51950	110	1742	1775	538	30	49	49	126	171	135	100	98	0	7237	6547	1636	24	312	312	356	174	48	100	98	0	0.244	0.277	0.270	0.282	1.672	0.254	0.799	80	602	100	8618	7961	-2.032	1693	6925	1726	6235	142005
8	21	22	AlexaAntiMouseAb~N/A	HA20457~B08R22C21	20190	11370	110	1740	1598	617	38	50	50	114	195	171	97	92	0	6244	5884	1107	18	202	202	252	119	47	100	100	0	0.280	0.272	0.273	0.242	2.017	0.269	0.694	80	598	100	7732	7230	-1.838	1690	6042	1548	5682	127844
4	2	8	Hs~MGC:BC044632.1~uORF:IOH62971~RFU:24037.12	HA20457~B04R08C02	16390	4110	110	1739	1919	660	34	50	50	99	134	135	100	100	0	1056	1049	152	14	154	154	186	107	57	100	100	0	1.873	2.088	2.183	2.004	1.437	2.489	0.723	80	569	100	2591	2764	0.905	1689	902	1869	895	153542
24	22	5	Hs~Ref:NM_170610.2~uORF:IOH40168~RFU:20192.14	HA20457~B24R05C22	20480	26000	110	1739	1743	497	28	49	49	62	60	96	100	100	0	1665	1659	101	6	97	97	109	36	33	100	100	0	1.078	1.085	1.064	1.032	1.392	1.141	0.819	80	598	100	3258	3256	0.108	1690	1568	1694	1562	139432
24	14	18	Hs~Ref:NM_012279.1~uORF:IOH6492~RFU:16398.47	HA20457~B24R18C14	18900	28630	110	1739	1630	493	30	48	48	56	73	130	100	100	0	2021	1992	331	16	85	85	90	20	22	100	100	0	0.873	0.830	0.878	0.800	1.537	0.982	0.622	80	556	100	3627	3489	-0.195	1691	1936	1582	1907	130374
16	5	20	Hs~MGC:BC008726.1~N/A~RFU:33376.64	HA20457~B16R20C05	17090	20020	110	1738	1727	412	23	60	60	215	276	128	100	100	0	514	523	56	10	140	140	139	56	40	100	100	0	4.487	4.352	4.293	4.260	1.323	5.106	0.738	80	577	100	2052	2050	2.166	1678	374	1667	383	138145
27	3	18	Hs~Ref:NM_031417.1~N/A~RFU:8059.9	HA20457~B27R18C03	12240	33130	110	1735	1996	764	38	47	47	48	15	31	100	100	0	338	346	123	35	100	100	101	11	10	100	100	0	7.092	7.923	8.876	7.899	1.785	9.618	0.545	80	583	100	1926	2195	2.826	1688	238	1949	246	159659
25	3	8	Hs~MGC:BC021930.1~uORF:IOH13703~RFU:21994.54	HA20457~B25R08C03	3190	31150	110	1733	1922	633	32	51	51	111	127	114	100	100	0	2424	2425	146	6	205	205	212	96	45	100	100	0	0.758	0.843	0.781	0.805	1.351	0.815	0.749	80	585	100	3901	4091	-0.400	1682	2219	1871	2220	153741
29	22	9	Hs~MGC:BC019039.2~uORF:IOH46089~RFU:46234.19	HA20457~B29R09C22	7050	35840	110	1732	1684	604	35	50	50	218	290	133	100	98	0	1725	1953	1219	62	124	124	291	263	90	100	100	0	1.051	0.893	1.053	0.898	1.723	0.717	0.420	80	574	100	3283	3463	0.071	1682	1601	1634	1829	134738
14	5	5	Hs~Ref:NM_133332.1~uORF:IOH38113~RFU:7790.39	HA20457~B14R05C05	7980	17050	110	1731	1660	432	26	48	48	51	39	76	100	100	0	1225	1212	124	10	95	95	97	8	8	100	100	0	1.489	1.443	1.447	1.399	1.373	1.540	0.788	80	584	100	2813	2729	0.575	1683	1130	1612	1117	132836
46	6	13	Hs~MGC:BC020729.1~uORF:IOH12978~RFU:9575.89	HA20457~B46R13C06	8430	54660	110	1730	1690	410	24	130	130	467	567	121	100	90	0	1081	1086	140	12	329	329	583	414	71	100	22	0	2.128	2.061	2.165	2.022	1.408	2.296	0.556	80	583	100	2352	2317	1.089	1600	752	1560	757	135182
2	15	8	Hs~Ref:NM_017503.2~uORF:IOH12519~RFU:7487.91	HA20457~B02R08C15	9960	4170	110	1721	1518	516	33	49	49	57	40	70	100	100	0	2107	1760	683	38	110	110	120	31	25	100	100	0	0.837	0.890	0.884	0.976	2.048	0.846	0.746	80	568	100	3669	3119	-0.256	1672	1997	1469	1650	121406
24	3	17	Hs~MGC:BC093990.1~uORF:IOH62017~RFU:37346.54	HA20457~B24R17C03	16680	28410	110	1715	1598	639	39	49	49	153	238	155	96	92	0	2207	3169	5127	161	95	95	240	315	131	100	100	0	0.789	0.504	0.752	0.530	3.462	0.112	0.131	80	581	100	3778	4623	-0.342	1666	2112	1549	3074	127862
20	3	12	Hs~MGC:BC000877.1~uORF:IOH3268~RFU:6120.09	HA20457~B20R12C03	16660	22890	110	1714	1828	527	28	47	47	74	141	190	100	100	0	1261	1257	285	22	86	86	100	67	67	100	100	0	1.419	1.521	1.326	1.503	1.576	1.651	0.708	80	576	100	2842	2952	0.505	1667	1175	1781	1171	146279
46	22	22	AlexaAntiMouseAb~N/A	HA20457~B46R22C22	11630	56430	110	1714	1528	901	58	46	46	53	56	105	86	85	0	7165	5676	2739	48	189	189	269	159	59	92	91	0	0.239	0.270	0.280	0.202	3.927	0.268	0.870	80	592	100	8644	6969	-2.064	1668	6976	1482	5487	122226
6	22	22	AlexaAntiMouseAb~N/A	HA20457~B06R22C22	11360	11440	110	1713	1742	624	35	47	47	48	10	20	100	100	0	7067	6883	618	8	112	112	167	105	62	100	100	0	0.240	0.250	0.242	0.232	1.487	0.249	0.796	80	603	100	8621	8466	-2.062	1666	6955	1695	6771	139321
12	8	6	Hs~Ref:NM_001017417.1~uORF:IOH54734~RFU:60903.09	HA20457~B12R06C08	17600	12720	110	1711	1803	609	33	53	53	382	540	141	100	81	0	1774	1727	189	10	122	122	424	465	109	100	98	0	1.004	1.090	1.039	1.027	1.442	1.364	0.573	80	570	100	3310	3355	0.005	1658	1652	1750	1605	144213
12	1	4	Hs~MGC:BC011842.2~uORF:IOH14099~RFU:37373.36	HA20457~B12R04C01	16190	12310	110	1711	1755	724	41	54	54	227	392	172	100	88	0	1888	1785	339	18	157	157	259	232	89	100	97	0	0.957	1.045	1.033	0.979	1.483	1.220	0.651	80	609	100	3388	3329	-0.063	1657	1731	1701	1628	140396
9	19	17	Hs~MGC:BC027900.1~uORF:IOH27306~RFU:11032.75	HA20457~B09R17C19	6320	14920	110	1709	1802	536	29	51	51	180	267	148	100	100	0	602	614	47	7	111	111	131	68	51	100	100	0	3.377	3.481	3.410	3.329	1.381	4.314	0.686	80	568	100	2149	2254	1.756	1658	491	1751	503	144181
35	21	22	AlexaAntiMouseAb~N/A	HA20457~B35R22C21	15860	42890	110	1707	1649	649	39	47	47	49	28	57	100	98	0	7078	6366	1528	24	165	165	213	100	46	100	100	0	0.240	0.258	0.244	0.242	1.669	0.255	0.841	80	591	100	8573	7803	-2.058	1660	6913	1602	6201	131902
2	1	11	AlexaAntiMouseAb~N/A	HA20457~B02R11C01	7160	4780	110	1705	1756	615	35	47	47	47	2	4	100	100	0	8980	8661	1484	17	131	131	165	77	46	100	100	0	0.187	0.200	0.196	0.191	1.509	0.186	0.763	80	580	100	10507	10239	-2.416	1658	8849	1709	8530	140482
29	19	17	Hs~MGC:BC000884.1~uORF:IOH3230~RFU:9169.46	HA20457~B29R17C19	6480	37430	110	1705	1670	674	40	47	47	63	87	138	98	98	0	314	314	53	16	117	117	122	24	19	100	100	0	8.416	8.239	7.634	7.662	1.555	9.346	0.819	80	574	100	1855	1820	3.073	1658	197	1623	197	133592
42	12	6	Hs~MGC:BC000412.1~uORF:IOH3631~RFU:16263.02	HA20457~B42R06C12	9580	48720	110	1700	1885	702	37	49	49	178	308	173	100	100	0	1374	1363	122	8	177	177	251	194	77	100	100	0	1.379	1.548	1.520	1.444	1.421	1.864	0.773	80	568	100	2848	3022	0.464	1651	1197	1836	1186	150835
8	6	15	Hs~Ref:NM_000998.3~uORF:IOH1576~RFU:3646.29	HA20457~B08R15C06	17170	9980	110	1699	1750	845	48	48	48	80	104	130	98	95	0	1204	1154	291	25	96	96	186	174	93	100	100	0	1.490	1.609	1.578	1.348	2.308	2.041	0.672	80	548	100	2759	2760	0.575	1651	1108	1702	1058	139970
46	3	21	Hs~Ref:NM_017528.2~uORF:IOH40629~RFU:10627.79	HA20457~B46R21C03	7840	56250	110	1694	1793	874	48	47	47	52	26	50	100	100	0	1911	1825	366	20	187	187	189	16	8	100	100	0	0.955	1.066	0.973	0.973	1.613	1.227	0.746	80	590	100	3371	3384	-0.066	1647	1724	1746	1638	143454
29	19	14	Hs~MGC:BC012760.2~uORF:IOH62834~RFU:26872.21	HA20457~B29R14C19	6470	36830	110	1693	1664	481	28	48	48	56	34	60	100	100	0	862	853	57	6	143	143	140	26	18	100	100	0	2.288	2.276	2.308	2.161	1.412	2.425	0.822	80	566	100	2364	2326	1.194	1645	719	1616	710	133146
45	9	4	Hs~Ref:NM_000984.2~uORF:IOH13591~RFU:26253.72	HA20457~B45R04C09	4490	52840	110	1692	1883	574	30	49	49	134	168	125	100	100	0	2495	2483	289	11	248	248	266	85	31	100	100	0	0.731	0.821	0.780	0.789	1.295	0.857	0.786	80	573	100	3890	4069	-0.452	1643	2247	1834	2235	150605
31	6	4	Hs~Ref:NM_022839.2~uORF:IOH1783~RFU:22644.16	HA20457~B31R04C06	12790	34840	110	1692	1762	441	25	48	48	50	36	72	100	100	0	1052	1055	57	5	101	101	104	17	16	100	100	0	1.729	1.797	1.699	1.740	1.306	2.022	0.788	80	559	100	2595	2668	0.790	1644	951	1714	954	140999
10	5	13	Hs~Ref:NM_003910.2~uORF:IOH23209~RFU:33594.98	HA20457~B10R13C05	7970	14140	110	1692	1692	547	32	51	51	188	265	140	100	100	0	1116	1136	100	8	111	111	237	197	83	100	100	0	1.633	1.601	1.613	1.509	1.416	1.958	0.729	80	556	100	2646	2666	0.707	1641	1005	1641	1025	135388
27	2	8	Hs~Ref:NM_016093.2~uORF:IOH14674~RFU:16951.26	HA20457~B27R08C02	12030	31140	110	1689	1634	707	43	48	48	49	10	20	100	100	0	1032	1030	161	15	102	102	107	21	19	100	100	0	1.765	1.709	1.685	1.547	1.893	2.144	0.560	80	591	100	2571	2514	0.819	1641	930	1586	928	130724
5	13	19	Hs~MGC:BC010467.1~uORF:IOH11119~RFU:37493.49	HA20457~B05R19C13	5090	10870	110	1688	1731	363	20	47	47	64	80	125	100	100	0	1837	1828	119	6	96	96	118	63	53	100	100	0	0.943	0.972	0.948	0.952	1.255	0.987	0.769	80	558	100	3382	3416	-0.085	1641	1741	1684	1732	138500
26	21	22	AlexaAntiMouseAb~N/A	HA20457~B26R22C21	11330	33960	110	1686	1709	750	43	47	47	49	24	48	100	100	0	5961	5670	1571	27	109	109	129	49	37	100	100	0	0.280	0.299	0.304	0.273	1.624	0.307	0.867	80	599	100	7491	7223	-1.836	1639	5852	1662	5561	136698
16	22	14	Hs~MGC:NM_152912.3~uORF:IOH26907~RFU:8518.56	HA20457~B16R14C22	20490	18810	110	1686	1664	496	29	47	47	49	20	40	100	100	0	1586	1490	206	13	91	91	94	15	15	100	100	0	1.096	1.156	1.120	1.103	1.447	1.248	0.804	80	590	100	3134	3016	0.133	1639	1495	1617	1399	133080
9	20	13	Hs~MGC:BC014452.1~uORF:IOH14883~RFU:55022.93	HA20457~B09R13C20	6520	14120	110	1685	1693	475	28	50	50	241	320	132	100	98	0	2148	2189	123	5	105	105	285	272	95	100	100	0	0.800	0.788	0.774	0.755	1.352	0.781	0.783	80	567	100	3678	3727	-0.321	1635	2043	1643	2084	135451
45	21	22	AlexaAntiMouseAb~N/A	HA20457~B45R22C21	6910	56430	110	1683	1710	747	43	47	47	131	194	148	100	96	0	7230	6589	1318	20	329	329	317	121	38	100	100	0	0.237	0.266	0.251	0.243	1.690	0.260	0.799	80	578	100	8537	7923	-2.077	1636	6901	1663	6260	136771
25	20	9	Hs~MGC:BC004876.1~uORF:IOH5626~RFU:37580.79	HA20457~B25R09C20	6600	31340	110	1681	1814	422	23	47	47	68	121	177	100	100	0	1501	1535	104	6	109	109	122	77	63	100	100	0	1.174	1.239	1.186	1.211	1.269	1.193	0.795	80	577	100	3026	3193	0.231	1634	1392	1767	1426	145096
17	13	12	Hs~Ref:NM_032338.2~uORF:IOH7537~RFU:9354.8	HA20457~B17R12C13	5120	22980	110	1680	1737	511	29	47	47	48	11	22	100	100	0	1747	1725	158	9	98	98	99	12	12	100	100	0	0.990	1.039	1.012	0.994	1.357	1.096	0.840	80	574	100	3282	3317	-0.014	1633	1649	1690	1627	138972
24	21	22	AlexaAntiMouseAb~N/A	HA20457~B24R22C21	20300	29410	110	1676	1381	727	52	48	48	51	26	50	92	91	0	6189	5692	1564	27	207	207	201	77	38	100	100	0	0.272	0.243	0.253	0.163	3.758	0.249	0.727	80	580	100	7610	6818	-1.878	1628	5982	1333	5485	110480
21	7	5	Hs~Ref:NM_016940.1~uORF:IOH12821~RFU:44638.65	HA20457~B21R05C07	3970	26050	110	1675	1635	557	34	48	48	72	126	175	100	100	0	1128	1125	59	5	120	120	147	105	71	100	100	0	1.614	1.579	1.618	1.449	1.603	1.738	0.750	80	577	100	2635	2592	0.691	1627	1008	1587	1005	130794
41	15	20	Hs~Ref:NM_152652.1~uORF:IOH41534~RFU:9918.15	HA20457~B41R20C15	5750	51570	110	1675	1584	517	32	47	47	47	7	14	100	100	0	1297	1240	347	27	158	158	159	11	6	100	100	0	1.429	1.421	1.404	1.431	1.527	1.457	0.857	80	524	100	2767	2619	0.515	1628	1139	1537	1082	126733
45	9	18	Hs~MGC:BC000190.1~uORF:IOH4410~RFU:9515.44	HA20457~B45R18C09	4500	55650	110	1674	1763	484	27	48	48	63	56	88	100	100	0	1324	1290	168	13	191	191	202	36	17	100	100	0	1.435	1.561	1.453	1.516	1.400	1.767	0.761	80	566	100	2759	2814	0.521	1626	1133	1715	1099	141064
29	20	14	Hs~MGC:BC012760.2~uORF:IOH62834~RFU:24860.49	HA20457~B29R14C20	6670	36830	110	1674	1742	718	41	48	48	66	82	124	100	100	0	847	834	69	8	119	119	131	27	20	100	100	0	2.234	2.369	2.103	2.185	1.510	3.013	0.736	80	548	100	2354	2409	1.159	1626	728	1694	715	139392
27	2	14	Hs~Ref:NM_001697.1~uORF:IOH13236~RFU:47190.29	HA20457~B27R14C02	12020	32330	110	1673	1634	520	31	48	48	67	82	122	100	98	0	1004	1008	52	5	108	108	121	46	38	100	100	0	1.814	1.762	1.825	1.628	1.581	1.961	0.780	80	567	100	2521	2486	0.859	1625	896	1586	900	130720
6	22	2	Hs~Ref:NM_000992.2~uORF:IOH1702~RFU:10501.09	HA20457~B06R02C22	11380	7450	110	1672	1734	519	29	47	47	56	71	126	100	100	0	1777	2031	1130	55	115	115	145	108	74	100	100	0	0.978	0.880	0.988	0.921	1.497	0.774	0.690	80	573	100	3287	3603	-0.032	1625	1662	1687	1916	138708
17	19	19	Hs~MGC:BC047690.1~uORF:IOH28834~RFU:5169.27	HA20457~B17R19C19	6330	24370	110	1672	1620	547	33	48	48	48	4	8	100	100	0	1302	1270	349	27	102	102	104	18	17	100	100	0	1.353	1.346	1.404	1.307	1.640	1.455	0.703	80	548	100	2824	2740	0.437	1624	1200	1572	1168	129563
47	8	8	Hs~MGC:BC010876.1~uORF:IOH9862~RFU:7208.52	HA20457~B47R08C08	13380	53610	110	1669	1714	671	39	46	46	49	27	55	100	100	0	1090	1058	108	10	176	176	178	23	12	100	100	0	1.776	1.891	1.816	1.746	1.454	2.168	0.804	80	545	100	2537	2550	0.828	1623	914	1668	882	137129
22	21	22	AlexaAntiMouseAb~N/A	HA20457~B22R22C21	11250	29420	110	1668	1756	752	42	47	47	48	6	12	100	100	0	6720	6164	1408	22	110	110	130	54	41	100	100	0	0.245	0.282	0.252	0.269	1.634	0.278	0.797	80	599	100	8231	7763	-2.028	1621	6610	1709	6054	140514
38	4	19	Hs~Ref:NM_006275.2~uORF:IOH3168~RFU:3128.72	HA20457~B38R19C04	7940	46840	110	1668	1479	569	38	49	49	204	281	137	95	90	0	2415	2386	492	20	156	156	264	177	67	100	96	0	0.717	0.641	0.715	0.601	1.521	0.609	0.720	80	562	100	3878	3660	-0.481	1619	2259	1430	2230	118333
48	1	16	Hs~Ref:NM_005409.3~CAT_PHC1695~RFU:9096.91	HA20457~B48R16C01	16500	55240	110	1663	1876	569	30	282	282	316	285	90	100	100	0	1635	1704	238	13	308	308	292	125	42	100	100	0	1.041	1.142	1.033	1.088	1.482	1.198	0.691	80	607	100	2708	2990	0.058	1381	1327	1594	1396	150040
46	2	16	Hs~Ref:NM_020168.3~CAT:PV3502~RFU:221.62	HA20457~B46R16C02	7630	55260	110	1663	1531	710	46	46	46	52	31	59	100	100	0	1176	1272	482	37	200	200	212	50	23	100	100	0	1.657	1.385	1.549	1.265	2.004	1.555	0.498	80	569	100	2593	2557	0.728	1617	976	1485	1072	122509
48	22	22	AlexaAntiMouseAb~N/A	HA20457~B48R22C22	20690	56410	110	1663	1445	874	60	47	47	56	111	198	85	83	0	6125	5338	2200	41	161	161	215	106	49	100	100	0	0.271	0.270	0.260	0.176	3.866	0.287	0.735	80	600	100	7580	6575	-1.884	1616	5964	1398	5177	115605
17	17	14	Hs~Ref:NM_003939.2~uORF:IOH42069~RFU:12444.32	HA20457~B17R14C17	5920	23370	110	1659	1715	715	41	49	49	62	51	82	100	100	0	964	939	106	11	112	112	132	38	28	100	100	0	1.890	2.015	1.895	1.855	1.578	2.560	0.686	80	577	100	2462	2493	0.918	1610	852	1666	827	137224
48	21	17	Hs~MGC:BC000522.1~uORF:IOH3622~RFU:36081.66	HA20457~B48R17C21	20510	55410	110	1658	1676	544	32	505	505	596	473	79	87	62	0	917	936	90	9	441	441	405	173	42	100	98	0	2.422	2.366	2.511	2.116	1.854	3.179	0.490	80	564	100	1629	1666	1.276	1153	476	1171	495	134043
7	22	22	AlexaAntiMouseAb~N/A	HA20457~B07R22C22	15930	11420	110	1657	1817	645	35	47	47	50	28	56	100	100	0	6822	6610	643	9	135	135	174	106	60	100	100	0	0.241	0.273	0.255	0.257	1.470	0.262	0.798	80	617	100	8297	8245	-2.054	1610	6687	1770	6475	145381
21	1	5	Hs~MGC:BC010907.1~uORF:IOH12088~RFU:16454.15	HA20457~B21R05C01	2770	26050	110	1656	1790	732	40	48	48	60	100	166	100	100	0	1457	1440	126	8	122	122	125	29	23	100	100	0	1.204	1.322	1.272	1.203	1.615	1.555	0.733	80	597	100	2943	3060	0.268	1608	1335	1742	1318	143193
5	15	3	Hs~Ref:NM_014366.1~uORF:IOH4189~RFU:11140.83	HA20457~B05R03C15	5470	7670	110	1656	1654	459	27	46	46	56	77	137	100	100	0	1633	1612	170	10	97	97	102	27	26	100	100	0	1.048	1.061	1.057	1.021	1.392	1.121	0.760	80	575	100	3146	3123	0.068	1610	1536	1608	1515	132297
48	21	22	AlexaAntiMouseAb~N/A	HA20457~B48R22C21	20510	56420	110	1653	1639	725	44	47	47	73	146	200	97	95	0	6442	6010	1087	18	317	317	277	86	31	100	100	0	0.262	0.280	0.281	0.246	1.966	0.278	0.750	80	566	100	7731	7285	-1.931	1606	6125	1592	5693	131128
6	22	11	Hs~Ref:NM_005801.2~uORF:IOH6916~RFU:26588.54	HA20457~B06R11C22	11370	9240	110	1652	1744	507	29	52	52	221	310	140	100	100	0	2025	2030	250	12	110	110	315	310	98	100	100	0	0.836	0.881	0.847	0.850	1.372	0.986	0.679	80	589	100	3515	3612	-0.259	1600	1915	1692	1920	139516
27	1	8	Hs~Ref:NM_016093.2~uORF:IOH14674~RFU:16790.36	HA20457~B27R08C01	11830	31140	110	1652	1667	368	22	48	48	48	8	16	100	100	0	1276	1245	152	12	101	101	102	12	11	100	100	0	1.365	1.415	1.396	1.386	1.390	1.520	0.824	80	581	100	2779	2763	0.449	1604	1175	1619	1144	133377
41	21	22	AlexaAntiMouseAb~N/A	HA20457~B41R22C21	6950	51950	110	1651	1628	574	35	49	49	118	165	139	98	97	0	7243	6782	1411	20	298	298	319	147	46	100	100	0	0.231	0.244	0.230	0.236	1.652	0.234	0.808	80	582	100	8547	8063	-2.116	1602	6945	1579	6484	130276
1	6	3	Hs~Ref:NM_000993.2~uORF:IOH14051~RFU:15269.65	HA20457~B01R03C06	3640	3170	110	1651	1623	681	41	47	47	48	9	18	100	100	0	1854	1822	207	11	118	118	119	10	8	100	100	0	0.924	0.925	0.885	0.789	2.015	1.005	0.709	80	585	100	3340	3280	-0.114	1604	1736	1576	1704	129826
37	17	6	Hs~MGC:BC031650.1~uORF:IOH22742~RFU:50423.58	HA20457~B37R06C17	6080	44270	110	1651	1567	612	39	81	81	195	208	106	100	100	0	1369	1391	104	7	346	346	293	152	51	100	100	0	1.535	1.422	1.484	1.294	1.585	1.363	0.631	80	517	100	2593	2531	0.618	1570	1023	1486	1045	125353
25	6	20	Hs~Ref:NM_032848.1~uORF:IOH13466~RFU:12454.15	HA20457~B25R20C06	3800	33550	110	1650	1667	519	31	47	47	63	101	160	100	100	0	1965	1982	258	13	120	120	145	78	53	100	100	0	0.869	0.870	0.812	0.831	1.439	0.975	0.789	80	548	100	3448	3482	-0.203	1603	1845	1620	1862	133357
47	18	7	Hs~MGC:BC028040.1~uORF:IOH11532~RFU:15087.34	HA20457~B47R07C18	15370	53390	110	1649	1763	650	36	46	46	61	94	154	100	100	0	1021	994	121	12	129	129	141	68	48	100	100	0	1.797	1.985	1.822	1.854	1.462	2.362	0.722	80	584	100	2495	2582	0.846	1603	892	1717	865	141055
6	21	22	AlexaAntiMouseAb~N/A	HA20457~B06R22C21	11170	11440	110	1649	1684	632	37	48	48	89	130	146	100	98	0	7269	6908	895	12	118	118	168	88	52	100	100	0	0.224	0.241	0.236	0.224	1.540	0.233	0.781	80	588	100	8752	8426	-2.159	1601	7151	1636	6790	134735
21	2	5	Hs~MGC:BC010907.1~uORF:IOH12088~RFU:16545.85	HA20457~B21R05C02	2980	26050	110	1648	1680	476	28	47	47	52	35	67	100	100	0	1373	1363	197	14	122	122	125	21	16	100	100	0	1.280	1.316	1.314	1.281	1.339	1.430	0.811	80	575	100	2852	2874	0.356	1601	1251	1633	1241	134375
47	5	19	Hs~MGC:BC029046.1~uORF:IOH27332~RFU:10850.44	HA20457~B47R19C05	12780	55840	110	1647	1639	447	27	131	131	184	167	90	100	100	0	1431	1360	154	11	337	337	338	67	19	100	100	0	1.386	1.474	1.462	1.417	1.422	1.519	0.742	80	513	100	2610	2531	0.471	1516	1094	1508	1023	131114
48	1	12	Hs~MGC:BC001088.1~uORF:IOH3839~RFU:21457.42	HA20457~B48R12C01	16500	54440	110	1645	1719	486	28	48	48	64	98	153	100	100	0	1220	1230	78	6	184	184	412	614	149	100	1	0	1.542	1.598	1.521	1.535	1.336	1.540	0.383	80	589	100	2633	2717	0.624	1597	1036	1671	1046	137515
29	19	5	Hs~MGC:BC001697.1~uORF:IOH3864~RFU:5185.08	HA20457~B29R05C19	6460	35030	110	1645	1701	607	35	47	47	47	4	8	100	100	0	1019	975	156	16	112	112	113	10	8	100	100	0	1.762	1.917	1.791	1.821	1.485	2.234	0.729	80	575	100	2505	2517	0.817	1598	907	1654	863	136088
9	19	13	Hs~MGC:BC014452.1~uORF:IOH14883~RFU:55556.77	HA20457~B09R13C19	6320	14130	110	1640	1935	710	36	50	50	239	343	143	100	98	0	2308	2910	1702	58	111	111	295	274	92	100	100	0	0.724	0.673	0.714	0.692	1.752	0.519	0.387	80	577	100	3787	4684	-0.467	1590	2197	1885	2799	154761
15	22	22	AlexaAntiMouseAb~N/A	HA20457~B15R22C22	15970	20380	110	1639	1675	675	40	47	47	47	2	4	100	100	0	5786	5408	1095	20	90	90	133	79	59	100	100	0	0.279	0.306	0.288	0.274	2.041	0.306	0.817	80	602	100	7288	6946	-1.839	1592	5696	1628	5318	134021
22	14	19	Hs~MGC:BC066958.1~uORF:IOH61486~RFU:46328.13	HA20457~B22R19C14	9850	28830	110	1639	1634	511	31	48	48	67	103	153	100	100	0	1221	1215	130	10	95	95	126	109	86	100	100	0	1.413	1.416	1.384	1.350	1.419	1.528	0.775	80	548	100	2717	2706	0.499	1591	1126	1586	1120	130716
32	17	18	Hs~Ref:NM_016848.2~uORF:IOH11138~RFU:47541.85	HA20457~B32R18C17	19540	37580	110	1638	1504	435	28	48	48	92	137	148	100	100	0	1048	1066	93	8	80	80	141	147	104	100	100	0	1.643	1.477	1.404	1.415	1.326	1.505	0.761	80	524	100	2558	2442	0.716	1590	968	1456	986	120289
14	5	10	Hs~Ref:NM_020664.3~uORF:IOH9825~RFU:45091.15	HA20457~B14R10C05	7980	18040	110	1637	1597	400	25	180	180	387	454	117	100	88	0	600	612	44	7	160	160	209	94	44	100	100	0	3.311	3.135	3.035	3.023	1.302	3.700	0.782	80	536	100	1897	1869	1.727	1457	440	1417	452	127758
16	6	8	Hs~Ref:NM_003582.1~N/A~RFU:10087.43	HA20457~B16R08C06	17280	17620	110	1635	1673	409	24	49	49	122	205	168	100	98	0	1212	1174	173	14	106	106	142	85	59	100	100	0	1.434	1.521	1.491	1.493	1.333	1.612	0.794	80	554	100	2692	2692	0.520	1586	1106	1624	1068	133827
25	15	4	Hs~MGC:BC031682.1~uORF:IOH22859~RFU:17445.13	HA20457~B25R04C15	5580	30340	110	1633	1638	695	42	47	47	54	44	81	100	100	0	1714	1708	150	8	107	107	113	30	26	100	100	0	0.987	0.994	0.988	0.894	1.626	1.101	0.772	80	554	100	3193	3192	-0.019	1586	1607	1591	1601	131018
13	5	7	Hs~Ref:NM_033256.1~uORF:IOH13214~RFU:39518.23	HA20457~B13R07C05	3550	17490	110	1632	1706	670	39	50	50	120	184	153	100	100	0	1228	1198	146	12	126	126	217	174	80	100	98	0	1.436	1.545	1.425	1.443	1.458	1.836	0.704	80	570	100	2684	2728	0.522	1582	1102	1656	1072	136478
35	3	5	Hs~MGC:BC010919.1~uORF:IOH27800~RFU:4849.33	HA20457~B35R05C03	12250	39510	110	1632	1701	585	34	47	47	48	8	16	100	100	0	817	798	182	22	115	115	121	22	18	100	100	0	2.258	2.422	2.254	2.344	1.509	2.737	0.817	80	592	100	2287	2337	1.175	1585	702	1654	683	136114
41	20	16	Hs~Ref:XM_294794.1~uORF:IOH42923~RFU:12667.41	HA20457~B41R16C20	6740	50770	110	1632	1452	574	39	47	47	55	32	58	100	100	0	1251	1222	124	10	161	161	165	21	12	100	100	0	1.454	1.324	1.440	1.194	1.548	1.498	0.830	80	558	100	2675	2466	0.540	1585	1090	1405	1061	116173
17	21	22	AlexaAntiMouseAb~N/A	HA20457~B17R22C21	6730	24960	110	1631	1647	650	39	48	48	51	17	33	100	100	0	6105	5837	969	16	114	114	159	90	56	100	100	0	0.264	0.279	0.262	0.262	1.466	0.277	0.821	80	589	100	7574	7322	-1.920	1583	5991	1599	5723	131733
43	13	17	Hs~Ref:NM_003092.3~uORF:IOH21977~RFU:21821.99	HA20457~B43R17C13	14300	50900	110	1630	1822	793	43	50	50	76	66	86	100	100	0	1020	922	267	28	197	197	198	38	19	100	98	0	1.920	2.444	2.162	2.561	2.065	2.947	0.693	80	548	100	2403	2497	0.941	1580	823	1772	725	145783
34	14	15	Hs~IVGN:PM_2141~Ext:Histone_F2a2~N/A	HA20457~B34R15C14	9910	41550	110	1630	1695	699	41	49	49	159	236	148	100	95	0	880	827	143	17	279	279	372	201	54	100	81	0	2.631	3.004	2.921	2.817	1.742	4.258	0.443	80	594	100	2182	2194	1.395	1581	601	1646	548	135604
22	1	12	Hs~Ref:NM_015640.1~uORF:IOH22934~RFU:27552.08	HA20457~B22R12C01	7240	27440	110	1630	1643	431	26	49	49	127	196	154	100	100	0	2933	2940	147	5	144	144	244	245	100	100	100	0	0.567	0.570	0.553	0.547	1.378	0.499	0.657	80	570	100	4370	4390	-0.819	1581	2789	1594	2796	131437
15	18	3	Hs~MGC:BC022361.1~uORF:IOH14170~RFU:19111.35	HA20457~B15R03C18	15150	16590	110	1630	1503	567	37	50	50	120	163	135	100	100	0	2177	2128	191	8	100	100	136	62	45	100	100	0	0.761	0.716	0.769	0.661	1.609	0.800	0.636	80	558	100	3657	3481	-0.395	1580	2077	1453	2028	120268
20	2	12	Hs~MGC:BC018137.1~uORF:IOH10369~RFU:29587.34	HA20457~B20R12C02	16450	22890	110	1629	1787	467	26	50	50	118	185	156	100	100	0	1792	1778	97	5	147	147	170	84	49	100	100	0	0.960	1.065	1.019	1.029	1.320	1.133	0.716	80	576	100	3224	3368	-0.059	1579	1645	1737	1631	142982
9	1	14	Hs~MGC:BC028151.1~uORF:IOH11514~RFU:14046.94	HA20457~B09R14C01	2710	14330	110	1629	1541	495	32	47	47	49	26	53	100	100	0	1528	1502	145	9	99	99	102	19	18	100	100	0	1.107	1.065	1.076	1.000	1.522	1.200	0.724	80	596	100	3011	2897	0.147	1582	1429	1494	1403	123309
20	18	19	Hs~MGC:BC066938.1~uORF:IOH40083~RFU:36108.63	HA20457~B20R19C18	19660	24280	110	1628	1732	459	26	49	49	54	31	57	100	100	0	810	821	69	8	82	82	89	20	22	100	100	0	2.169	2.277	2.315	2.199	1.300	2.501	0.780	80	566	100	2307	2422	1.117	1579	728	1683	739	138567
5	15	12	Hs~Ref:NM_133336.1~uORF:IOH42549~RFU:3599.33	HA20457~B05R12C15	5480	9460	110	1627	1638	599	36	47	47	51	29	56	100	100	0	1864	1803	203	11	99	99	106	22	20	100	100	0	0.895	0.934	0.905	0.873	1.513	1.034	0.750	80	558	100	3345	3295	-0.160	1580	1765	1591	1704	131050
30	22	13	Hs~MGC:BC001048.1~uORF:IOH4605~RFU:30870.09	HA20457~B30R13C22	11510	36660	110	1625	1742	627	35	48	48	98	170	173	100	100	0	453	537	289	53	110	110	134	61	45	100	100	0	4.598	3.967	4.626	4.121	1.782	5.316	0.429	80	590	100	1920	2121	2.201	1577	343	1694	427	139367
24	20	20	Hs~Ref:NM_172238.1~uORF:IOH34861~RFU:19334.06	HA20457~B24R20C20	20090	29010	110	1624	1634	557	34	52	52	166	196	118	100	98	0	1829	1813	113	6	110	110	155	83	53	100	100	0	0.914	0.929	0.911	0.868	1.472	1.034	0.697	80	548	100	3291	3285	-0.129	1572	1719	1582	1703	130733
1	20	3	Hs~Ref:NM_004865.2~uORF:IOH10084~RFU:4851.53	HA20457~B01R03C20	6430	3160	110	1624	1604	629	39	46	46	51	33	64	100	100	0	1455	1428	224	15	110	110	111	9	8	100	100	0	1.173	1.182	1.077	1.080	1.548	1.366	0.796	80	558	100	2923	2876	0.230	1578	1345	1558	1318	128326
23	15	8	Hs~Ref:NM_201259.1~uORF:IOH45586~RFU:47871.09	HA20457~B23R08C15	14550	26620	110	1621	1653	645	39	49	49	82	136	165	100	98	0	1228	1207	100	8	130	130	154	91	59	100	100	0	1.432	1.489	1.516	1.349	1.623	1.748	0.721	80	577	100	2670	2681	0.518	1572	1098	1604	1077	132271
38	14	18	Hs~MGC:BC033886.2~uORF:IOH27178~RFU:4003.28	HA20457~B38R18C14	9960	46640	110	1619	1459	545	37	48	48	77	89	115	100	100	0	953	893	237	26	151	151	178	73	41	100	100	0	1.959	1.902	1.949	1.849	1.715	2.166	0.744	80	559	100	2373	2153	0.970	1571	802	1411	742	116702
27	17	2	Hs~MGC:NM_148179.1~uORF:IOH23094~RFU:5153.93	HA20457~B27R02C17	15030	29930	110	1617	1711	785	45	47	47	48	6	12	100	100	0	651	623	90	14	111	111	115	15	13	100	100	0	2.907	3.250	3.293	2.855	1.938	4.272	0.649	80	558	100	2110	2176	1.540	1570	540	1664	512	136906
6	20	13	Hs~MGC:BC020597.1~uORF:IOH14197~RFU:35091.7	HA20457~B06R13C20	10980	9640	110	1617	1681	402	23	49	49	161	262	162	100	100	0	1396	1397	95	6	106	106	241	278	115	100	100	0	1.216	1.264	1.240	1.233	1.266	1.312	0.774	80	548	100	2858	2923	0.282	1568	1290	1632	1291	134460
12	11	6	Hs~Ref:NM_032636.2~uORF:IOH4088~RFU:42323.29	HA20457~B12R06C11	18220	12700	110	1615	1621	447	27	57	57	160	179	111	100	100	0	1990	2424	3780	155	221	221	208	111	53	100	100	0	0.881	0.710	0.877	0.817	1.622	0.078	0.076	80	556	100	3327	3767	-0.183	1558	1769	1564	2203	129665
48	9	14	Hs~MGC:NM_015014.1~uORF:IOH23193~RFU:3632.81	HA20457~B48R14C09	18100	54830	110	1615	1562	607	38	46	46	52	37	71	100	100	0	1128	1089	250	22	152	152	156	19	12	100	100	0	1.608	1.618	1.636	1.544	1.520	1.851	0.786	80	585	100	2545	2453	0.685	1569	976	1516	937	124962
14	21	22	AlexaAntiMouseAb~N/A	HA20457~B14R22C21	11190	20430	110	1614	1655	813	49	48	48	51	28	54	98	97	0	6542	6236	1018	16	104	104	158	95	60	100	100	0	0.243	0.262	0.248	0.203	2.608	0.270	0.787	80	590	100	8004	7739	-2.040	1566	6438	1607	6132	132414
24	12	15	Hs~Ref:NM_004114.2~uORF:IOH13832~RFU:11566.22	HA20457~B24R15C12	18480	28000	110	1612	1644	529	32	50	50	85	101	118	100	100	0	1668	1572	234	14	108	108	110	36	32	100	100	0	1.001	1.089	1.080	1.035	1.565	1.162	0.793	80	566	100	3122	3058	0.002	1562	1560	1594	1464	131540
2	16	8	Hs~Ref:NM_017503.2~uORF:IOH12519~RFU:8922.06	HA20457~B02R08C16	10160	4170	110	1611	1601	593	37	48	48	58	50	86	100	100	0	2143	1806	724	40	106	106	116	31	26	100	100	0	0.767	0.914	0.894	0.983	1.894	0.871	0.830	80	557	100	3600	3253	-0.382	1563	2037	1553	1700	128061
12	20	14	Hs~Ref:NM_000525.3~uORF:IOH60138~RFU:4805.68	HA20457~B12R14C20	20030	14300	110	1609	1745	840	48	47	47	52	26	50	100	100	0	382	384	56	14	112	112	121	28	23	100	100	0	5.785	6.243	5.698	5.501	1.673	7.926	0.781	80	567	100	1832	1970	2.532	1562	270	1698	272	139636
1	1	11	AlexaAntiMouseAb~N/A	HA20457~B01R11C01	2650	4770	110	1608	1627	704	43	48	48	48	3	6	100	100	0	8414	7927	1393	17	148	148	178	81	45	100	100	0	0.189	0.203	0.207	0.167	2.326	0.189	0.729	80	590	100	9826	9358	-2.406	1560	8266	1579	7779	130150
10	13	8	Hs~MGC:BC013796.1~uORF:IOH21478~RFU:4105.9	HA20457~B10R08C13	9580	13120	110	1608	1546	449	29	49	49	78	73	93	100	100	0	1378	1327	200	15	146	146	156	56	35	100	100	0	1.265	1.268	1.263	1.219	1.483	1.403	0.788	80	565	100	2791	2678	0.340	1559	1232	1497	1181	123714
37	18	7	Hs~MGC:BC028301.1~uORF:IOH11759~RFU:5393.01	HA20457~B37R07C18	6260	44470	110	1606	1466	833	56	49	49	105	139	132	91	88	0	1409	1269	389	30	141	141	210	128	60	96	93	0	1.228	1.256	1.210	0.951	3.377	1.544	0.780	80	536	100	2825	2545	0.296	1557	1268	1417	1128	117317
29	15	18	Hs~MGC:BC056911.1~uORF:IOH29120~RFU:32878.53	HA20457~B29R18C15	5660	37630	110	1605	1689	741	43	102	102	230	256	111	98	90	0	628	620	53	8	213	213	270	124	45	100	100	0	3.622	3.899	3.741	3.410	1.715	6.109	0.548	80	591	100	1918	1994	1.857	1503	415	1587	407	135150
34	21	22	AlexaAntiMouseAb~N/A	HA20457~B34R22C21	11320	42950	110	1605	1539	905	58	47	47	55	49	89	88	85	0	7928	6412	2699	42	141	141	242	160	66	100	100	0	0.200	0.238	0.222	0.159	3.130	0.259	0.853	80	578	100	9345	7763	-2.321	1558	7787	1492	6271	123134
24	22	22	AlexaAntiMouseAb~N/A	HA20457~B24R22C22	20500	29420	110	1605	1428	647	45	47	47	47	3	6	97	93	0	6575	6217	1260	20	107	107	160	89	55	100	100	0	0.241	0.226	0.233	0.169	4.023	0.221	0.729	80	621	100	8026	7491	-2.054	1558	6468	1381	6110	114243
24	21	5	Hs~Ref:NM_170610.2~uORF:IOH40168~RFU:19657.21	HA20457~B24R05C21	20280	26000	110	1604	1570	513	32	50	50	67	90	134	100	100	0	1842	2014	843	41	102	102	110	35	31	100	100	0	0.893	0.795	0.883	0.781	1.622	0.740	0.599	80	558	100	3294	3432	-0.163	1554	1740	1520	1912	125589
1	1	1	AlexaAntiMouseAb~N/A	HA20457~B01R01C01	2640	2770	110	1603	1427	665	46	46	46	46	2	4	100	100	0	9383	8680	2187	25	182	182	209	71	33	100	100	0	0.169	0.163	0.171	0.135	2.287	0.158	0.751	80	612	100	10758	9879	-2.563	1557	9201	1381	8498	114181
10	6	13	Hs~Ref:NM_003910.2~uORF:IOH23209~RFU:35188.86	HA20457~B10R13C06	8170	14140	110	1601	1661	494	29	52	52	156	220	141	100	100	0	1097	1123	81	7	124	124	243	203	83	100	100	0	1.592	1.611	1.549	1.541	1.332	2.019	0.718	80	575	100	2522	2608	0.671	1549	973	1609	999	132863
31	8	9	Hs~MGC:BC033621.2~uORF:IOH21688~RFU:25106.03	HA20457~B31R09C08	13190	35830	110	1597	1553	522	33	47	47	61	79	129	100	100	0	1736	2249	2102	93	104	104	111	29	26	100	100	0	0.950	0.702	0.880	0.767	1.751	0.385	0.376	80	556	100	3182	3651	-0.074	1550	1632	1506	2145	124219
13	16	19	Hs~Ref:XM_374177.2~uORF:IOH43615~RFU:43085.94	HA20457~B13R19C16	5750	19860	110	1596	1637	419	25	49	49	80	116	145	100	100	0	1254	1254	105	8	119	119	158	80	50	100	100	0	1.363	1.399	1.364	1.355	1.340	1.451	0.764	80	595	100	2682	2723	0.447	1547	1135	1588	1135	130935
37	14	14	Hs~MGC:NM_178588.1~uORF:IOH13592~RFU:7805.68	HA20457~B37R14C14	5490	45880	110	1593	1691	794	46	47	47	51	23	45	97	97	0	404	393	79	20	142	142	143	17	11	100	98	0	5.901	6.550	5.936	5.609	2.416	8.085	0.722	80	569	100	1808	1895	2.561	1546	262	1644	251	135270
44	15	17	Hs~Ref:NM_175065.2~uORF:IOH35055~RFU:5271.58	HA20457~B44R17C15	19240	50900	110	1593	1569	480	30	46	46	55	56	101	100	100	0	1098	1126	164	14	125	125	146	64	43	100	100	0	1.590	1.521	1.534	1.464	1.382	1.622	0.773	80	572	100	2520	2524	0.669	1547	973	1523	1001	125521
22	8	21	Hs~Ref:NM_015609.1~uORF:IOH23006~RFU:17290.74	HA20457~B22R21C08	8630	29230	110	1591	1631	556	34	48	48	166	363	218	100	96	0	2921	2774	478	17	127	127	214	253	118	100	100	0	0.552	0.598	0.572	0.578	1.345	0.607	0.777	80	576	100	4337	4230	-0.857	1543	2794	1583	2647	130474
25	4	8	Hs~MGC:BC021930.1~uORF:IOH13703~RFU:21468.34	HA20457~B25R08C04	3390	31150	110	1591	1594	618	38	49	49	99	118	119	100	100	0	2425	2404	128	5	123	123	168	83	49	100	100	0	0.670	0.677	0.654	0.628	1.487	0.762	0.688	80	559	100	3844	3826	-0.578	1542	2302	1545	2281	127525
17	13	5	Hs~Ref:NM_032140.1~uORF:IOH6250~RFU:35772.93	HA20457~B17R05C13	5110	21570	110	1588	1739	544	31	48	48	63	57	90	100	100	0	1373	1393	162	11	100	100	118	43	36	100	100	0	1.210	1.308	1.295	1.256	1.420	1.527	0.735	80	558	100	2813	2984	0.275	1540	1273	1691	1293	139115
5	3	14	Hs~MGC:BC052966.1~uORF:IOH28846~RFU:12449.78	HA20457~B05R14C03	3080	9870	110	1588	1616	540	33	49	49	73	103	141	100	100	0	1335	1317	85	6	133	133	147	50	34	100	100	0	1.280	1.323	1.323	1.240	1.465	1.448	0.782	80	593	100	2741	2751	0.357	1539	1202	1567	1184	129280
48	2	12	Hs~MGC:BC001088.1~uORF:IOH3839~RFU:24908.3	HA20457~B48R12C02	16700	54420	110	1588	1542	700	45	47	47	74	146	197	98	97	0	830	850	94	11	173	173	432	630	145	67	0	0	2.346	2.208	2.075	1.859	2.240	1.384	0.032	80	567	100	2198	2172	1.230	1541	657	1495	677	123395
9	15	8	Hs~Ref:NM_018105.1~uORF:IOH10776~RFU:9497.77	HA20457~B09R08C15	5510	13120	110	1581	1689	654	38	47	47	50	22	44	100	100	0	1625	1598	148	9	102	102	113	31	27	100	100	0	1.007	1.098	1.061	1.005	1.512	1.183	0.792	80	558	100	3057	3138	0.010	1534	1523	1642	1496	135086
28	9	3	Hs~Ref:NM_005678.3~uORF:IOH45840~RFU:42555.8	HA20457~B28R03C09	17900	30090	110	1581	1662	515	30	54	54	222	285	128	100	100	0	930	921	82	8	155	155	356	272	76	100	100	0	1.970	2.099	2.133	2.004	1.387	2.698	0.528	80	565	100	2302	2374	0.978	1527	775	1608	766	132938
13	21	22	AlexaAntiMouseAb~N/A	HA20457~B13R22C21	6750	20450	110	1577	1630	825	50	48	48	55	40	72	96	95	0	6070	5672	1219	21	106	106	158	93	58	100	100	0	0.256	0.284	0.269	0.216	2.425	0.290	0.783	80	590	100	7493	7148	-1.964	1529	5964	1582	5566	130384
10	14	8	Hs~MGC:BC013796.1~uORF:IOH21478~RFU:3991.27	HA20457~B10R08C14	9770	13120	110	1577	1515	445	29	49	49	71	65	91	100	100	0	1400	1369	201	14	124	124	148	62	41	100	100	0	1.197	1.178	1.202	1.128	1.453	1.275	0.798	80	576	100	2804	2711	0.260	1528	1276	1466	1245	121160
13	3	21	Hs~MGC:BC023527.2~uORF:IOH29316~RFU:10873.36	HA20457~B13R21C03	3150	20280	110	1577	1472	501	34	49	49	148	213	143	100	96	0	390	381	61	16	113	113	253	254	100	62	0	0	5.516	5.310	5.337	5.038	1.625	6.379	0.172	80	522	100	1805	1691	2.464	1528	277	1423	268	117799
28	22	2	Hs~Ref:NM_014047.1~uORF:IOH11187~RFU:35842.79	HA20457~B28R02C22	20500	29870	110	1576	1431	324	22	48	48	60	67	111	100	100	0	1345	1350	105	7	88	88	109	46	42	100	100	0	1.216	1.096	1.121	1.064	1.293	1.107	0.778	80	570	100	2785	2645	0.282	1528	1257	1383	1262	114499
42	3	17	Hs~Ref:NM_004635.2~uORF:IOH3889~RFU:22883.18	HA20457~B42R17C03	7820	50930	110	1575	1620	476	29	64	64	155	189	121	100	100	0	886	898	62	6	231	231	374	1289	344	0	0	0	2.307	2.333	2.242	2.238	1.337	2.539	0.637	80	577	100	2166	2223	1.206	1511	655	1556	667	129620
23	18	2	Hs~Ref:NM_144714.1~uORF:IOH11221~RFU:3391.92	HA20457~B23R02C18	15140	25410	110	1575	1592	425	26	48	48	58	60	103	100	100	0	1247	1249	104	8	93	93	102	45	44	100	100	0	1.323	1.336	1.257	1.284	1.344	1.440	0.817	80	564	100	2681	2700	0.404	1527	1154	1544	1156	127334
12	17	12	Hs~MGC:BC103660.1~uORF:IOH63319~RFU:7439.96	HA20457~B12R12C17	19420	13900	110	1572	1517	539	35	46	46	48	10	20	100	100	0	877	819	140	17	90	90	99	33	33	100	100	0	1.939	2.018	2.026	1.818	1.886	2.308	0.781	80	583	100	2313	2200	0.955	1526	787	1471	729	121361
15	7	12	Hs~Ref:NM_016508.2~uORF:IOH21339~RFU:42574.24	HA20457~B15R12C07	12960	18390	110	1570	1640	572	34	53	53	192	291	151	100	100	0	1079	1092	88	8	160	160	234	173	73	100	100	0	1.651	1.703	1.579	1.603	1.425	1.865	0.726	80	577	100	2436	2519	0.723	1517	919	1587	932	131170
37	1	14	Hs~MGC:BC020712.1~uORF:IOH13788~RFU:52689.73	HA20457~B37R14C01	2870	45900	110	1570	1583	442	27	47	47	82	117	142	100	100	0	1137	1156	96	8	165	165	243	145	59	100	100	0	1.567	1.550	1.596	1.478	1.432	1.783	0.773	80	592	100	2495	2527	0.648	1523	972	1536	991	126607
24	11	15	Hs~Ref:NM_004114.2~uORF:IOH13832~RFU:15420.39	HA20457~B24R15C11	18290	28010	110	1569	1577	556	35	55	55	106	103	97	100	100	0	1616	1560	146	9	134	134	138	31	22	100	100	0	1.022	1.067	1.050	0.996	1.534	1.186	0.738	80	566	100	2996	2948	0.031	1514	1482	1522	1426	126181
5	16	5	Hs~MGC:BC048299.1~uORF:IOH26615~RFU:31959.61	HA20457~B05R05C16	5670	8070	110	1569	1534	622	40	47	47	64	101	157	100	100	0	1127	1139	104	9	95	95	104	52	50	100	100	0	1.475	1.424	1.500	1.273	1.666	1.766	0.667	80	567	100	2554	2531	0.561	1522	1032	1487	1044	122739
9	15	6	Hs~Ref:NM_013975.1~uORF:IOH40893~RFU:24500.56	HA20457~B09R06C15	5520	12740	110	1568	1631	489	29	50	50	134	174	129	100	100	0	1340	1345	64	4	118	118	198	138	69	100	100	0	1.242	1.289	1.227	1.230	1.348	1.446	0.736	80	567	100	2740	2808	0.313	1518	1222	1581	1227	130482
34	1	9	Hs~MGC:BC068514.1~uORF:IOH40543~RFU:4358.26	HA20457~B34R09C01	7320	40340	110	1568	1539	568	36	47	47	54	44	81	100	100	0	1830	1763	246	13	135	135	138	22	15	100	100	0	0.897	0.916	0.912	0.857	1.461	0.981	0.824	80	598	100	3216	3120	-0.156	1521	1695	1492	1628	123106
25	16	4	Hs~MGC:BC031682.1~uORF:IOH22859~RFU:16770.83	HA20457~B25R04C16	5780	30340	110	1567	1653	460	27	48	48	56	49	87	100	100	0	1642	1603	124	7	108	108	115	38	33	100	100	0	0.990	1.074	1.058	1.027	1.406	1.148	0.846	80	546	100	3053	3100	-0.014	1519	1534	1605	1495	132237
13	3	20	Hs~Ref:NM_139169.2~uORF:IOH22254~RFU:31955.92	HA20457~B13R20C03	3160	20080	110	1567	1595	478	29	49	49	144	216	150	100	100	0	1406	1403	104	7	121	121	245	256	104	100	100	0	1.181	1.206	1.219	1.153	1.386	1.249	0.645	80	576	100	2803	2828	0.240	1518	1285	1546	1282	127604
13	22	22	AlexaAntiMouseAb~N/A	HA20457~B13R22C22	6950	20460	110	1566	1440	654	45	48	48	49	8	16	98	98	0	5882	5765	553	9	121	121	222	268	120	100	100	0	0.263	0.247	0.262	0.195	2.516	0.257	0.793	80	620	100	7279	7036	-1.924	1518	5761	1392	5644	115163
5	16	12	Hs~Ref:NM_133336.1~uORF:IOH42549~RFU:3633.74	HA20457~B05R12C16	5680	9470	110	1565	1572	372	23	47	47	55	39	70	100	100	0	1883	1811	231	12	95	95	105	30	28	100	100	0	0.849	0.889	0.890	0.872	1.326	0.919	0.827	80	585	100	3306	3241	-0.236	1518	1788	1525	1716	125777
21	10	6	Hs~MGC:BC064940.1~uORF:IOH39946~RFU:20327.51	HA20457~B21R06C10	4580	26250	110	1561	1666	604	36	47	47	50	25	50	100	100	0	1050	1046	106	10	113	113	114	12	10	100	100	0	1.616	1.735	1.626	1.643	1.467	2.015	0.747	80	567	100	2451	2552	0.692	1514	937	1619	933	133301
17	1	11	AlexaAntiMouseAb~N/A	HA20457~B17R11C01	2720	22780	110	1560	1505	480	31	48	48	48	7	14	100	100	0	7336	7098	977	13	126	126	146	59	40	100	100	0	0.210	0.209	0.210	0.197	1.411	0.210	0.892	80	570	100	8722	8429	-2.254	1512	7210	1457	6972	120409
32	22	8	Hs~Ref:NM_198965.1~uORF:IOH44500~RFU:4808.95	HA20457~B32R08C22	20520	35600	110	1560	1495	490	32	48	48	52	22	42	100	100	0	1220	1158	271	23	89	89	97	23	23	100	100	0	1.337	1.354	1.333	1.280	1.560	1.429	0.884	80	590	100	2643	2516	0.419	1512	1131	1447	1069	119610
23	5	8	Hs~Ref:NM_017593.2~N/A~RFU:16635.37	HA20457~B23R08C05	12560	26630	110	1559	1603	817	50	48	48	92	224	243	100	95	0	513	515	35	6	107	107	114	39	34	100	100	0	3.722	3.811	3.472	3.290	1.771	5.902	0.518	80	582	100	1917	1963	1.896	1511	406	1555	408	128225
4	16	16	Hs~Ref:NM_014473.2~uORF:IOH9851~RFU:20614.63	HA20457~B04R16C16	19200	5710	110	1559	1566	504	32	51	51	199	282	141	100	100	0	2038	2076	190	9	195	195	287	198	68	100	100	0	0.818	0.805	0.817	0.763	1.430	0.799	0.711	80	562	100	3351	3396	-0.289	1508	1843	1515	1881	125268
27	1	18	Hs~MGC:BC022520.1~uORF:IOH10749~RFU:11104.91	HA20457~B27R18C01	11820	33130	110	1559	1532	675	44	47	47	50	21	42	100	100	0	520	520	43	8	106	106	107	11	10	100	100	0	3.652	3.587	3.502	3.245	1.586	4.625	0.703	80	589	100	1926	1899	1.869	1512	414	1485	414	122569
40	16	17	Hs~MGC:BC009108.1~uORF:IOH10191~RFU:40102.31	HA20457~B40R17C16	19400	46410	110	1557	1576	534	33	46	46	50	21	42	100	100	0	1656	1669	294	17	102	102	113	114	100	100	100	0	0.972	0.976	0.983	0.938	1.598	0.892	0.572	80	592	100	3065	3097	-0.040	1511	1554	1530	1567	126067
1	5	3	Hs~Ref:NM_000993.2~uORF:IOH14051~RFU:15347.16	HA20457~B01R03C05	3440	3170	110	1557	1456	439	30	47	47	59	65	110	100	98	0	1737	1709	255	14	122	122	131	53	40	100	100	0	0.935	0.888	0.928	0.824	1.714	0.942	0.702	80	558	100	3125	2996	-0.097	1510	1615	1409	1587	116465
9	21	22	AlexaAntiMouseAb~N/A	HA20457~B09R22C21	6730	15940	110	1556	1575	751	47	47	47	63	82	130	98	98	0	6448	6122	815	13	102	102	116	41	35	100	100	0	0.238	0.254	0.239	0.213	2.007	0.257	0.780	80	612	100	7855	7548	-2.072	1509	6346	1528	6020	125983
5	15	5	Hs~MGC:BC048299.1~uORF:IOH26615~RFU:37760.92	HA20457~B05R05C15	5470	8060	110	1554	1618	476	29	47	47	56	68	121	100	100	0	1210	1227	135	11	95	95	101	35	34	100	100	0	1.352	1.388	1.411	1.334	1.366	1.555	0.720	80	568	100	2622	2703	0.435	1507	1115	1571	1132	129453
19	10	14	Hs~Ref:NM_024038.2~uORF:IOH5926~RFU:60894.72	HA20457~B19R14C10	13550	23300	110	1554	1513	477	31	102	102	426	598	140	90	70	0	1818	1819	382	21	184	184	596	912	153	98	27	0	0.889	0.863	0.873	0.821	1.564	0.474	0.195	80	592	100	3086	3046	-0.170	1452	1634	1411	1635	121001
36	22	2	Hs~MGC:BC002733.2~uORF:IOH5365~RFU:50213.97	HA20457~B36R02C22	20610	38870	110	1552	1582	469	29	48	48	171	281	164	100	100	0	2128	2112	199	9	93	93	216	244	112	100	100	0	0.739	0.760	0.708	0.730	1.426	0.858	0.718	80	580	100	3539	3553	-0.436	1504	2035	1534	2019	126575
5	16	3	Hs~Ref:NM_014366.1~uORF:IOH4189~RFU:12690.66	HA20457~B05R03C16	5670	7670	110	1551	1631	465	28	46	46	58	104	179	100	100	0	1670	1633	174	10	97	97	104	32	30	100	100	0	0.957	1.032	0.992	0.998	1.345	1.128	0.763	80	559	100	3078	3121	-0.064	1505	1573	1585	1536	130514
15	19	13	Hs~MGC:BC009348.2~uORF:IOH12064~RFU:25197.6	HA20457~B15R13C19	15370	18570	110	1551	1625	391	24	50	50	217	324	149	100	100	0	2379	2375	142	5	112	112	247	268	108	100	100	0	0.662	0.696	0.671	0.678	1.277	0.700	0.779	80	557	100	3768	3838	-0.595	1501	2267	1575	2263	129968
32	16	6	Hs~Ref:NM_198217.1~uORF:IOH59743~RFU:7030.32	HA20457~B32R06C16	19320	35200	110	1551	1461	546	37	47	47	49	19	38	100	100	0	1203	1159	170	14	80	80	82	17	20	100	100	0	1.339	1.310	1.338	1.224	1.475	1.529	0.797	80	547	100	2627	2493	0.421	1504	1123	1414	1079	116900
5	22	22	AlexaAntiMouseAb~N/A	HA20457~B05R22C22	6890	11470	110	1548	1695	654	38	47	47	53	34	64	100	100	0	6920	6798	499	7	127	127	181	96	53	100	100	0	0.221	0.247	0.223	0.228	1.469	0.251	0.757	80	610	100	8294	8319	-2.178	1501	6793	1648	6671	135576
4	22	22	AlexaAntiMouseAb~N/A	HA20457~B04R22C22	20400	6900	110	1548	1565	589	37	48	48	64	73	114	100	100	0	6975	6727	1104	16	331	331	352	106	30	100	100	0	0.226	0.237	0.225	0.225	1.541	0.216	0.733	80	620	100	8144	7913	-2.147	1500	6644	1517	6396	125224
47	14	7	Hs~MGC:BC016987.1~uORF:IOH11787~RFU:9614.63	HA20457~B47R07C14	14570	53400	110	1546	1531	461	30	48	48	72	65	90	100	100	0	1242	1186	181	15	161	161	170	34	20	100	100	0	1.386	1.447	1.418	1.396	1.359	1.592	0.803	80	568	100	2579	2508	0.471	1498	1081	1483	1025	122476
29	11	7	Hs~Ref:NM_002110.1~uORF:IOH21123~RFU:6673.58	HA20457~B29R07C11	4860	35430	110	1546	1528	676	44	47	47	47	8	17	100	100	0	314	309	46	14	112	112	114	11	9	100	100	0	7.421	7.518	7.225	6.841	1.754	9.897	0.644	80	557	100	1701	1678	2.892	1499	202	1481	197	122231
40	12	15	Hs~Ref:NM_003517.2~uORF:IOH29296~RFU:19038.32	HA20457~B40R15C12	18590	46020	110	1543	1538	486	31	47	47	68	152	223	100	100	0	1848	1846	222	12	126	126	129	23	17	100	100	0	0.869	0.867	0.851	0.829	1.439	0.900	0.787	80	576	100	3218	3211	-0.203	1496	1722	1491	1720	123019
13	8	6	Hs~MGC:BC070073.1~uORF:IOH40070~RFU:4974.89	HA20457~B13R06C08	4140	17280	110	1542	1543	684	44	47	47	49	12	24	100	100	0	1176	1099	227	20	107	107	119	29	24	100	100	0	1.399	1.508	1.597	1.334	1.940	1.804	0.728	80	577	100	2564	2488	0.484	1495	1069	1496	992	123475
29	5	4	Hs~Ref:NM_001321.1~uORF:IOH1779~RFU:10594.98	HA20457~B29R04C05	3650	34840	110	1541	1533	536	34	47	47	47	2	4	100	100	0	742	734	107	14	123	123	125	15	12	100	100	0	2.414	2.432	2.479	2.260	1.560	2.837	0.792	80	556	100	2113	2097	1.271	1494	619	1486	611	122634
27	5	21	Hs~Ref:NM_001026.3~uORF:IOH42145~RFU:4822.05	HA20457~B27R21C05	12630	33730	110	1538	1571	616	39	46	46	46	2	4	100	100	0	834	790	261	33	98	98	99	8	8	100	100	0	2.027	2.204	2.268	2.177	1.708	2.518	0.734	80	566	100	2228	2217	1.019	1492	736	1525	692	125672
20	2	20	Hs~MGC:BC000535.1~uORF:IOH4145~RFU:8397.38	HA20457~B20R20C02	16460	24490	110	1537	1640	530	32	49	49	58	50	86	100	100	0	1153	1146	137	11	105	105	114	37	32	100	100	0	1.420	1.528	1.480	1.448	1.470	1.761	0.789	80	557	100	2536	2632	0.506	1488	1048	1591	1041	131162
21	21	22	AlexaAntiMouseAb~N/A	HA20457~B21R22C21	6800	29450	110	1537	1570	531	33	48	48	53	35	66	100	100	0	6505	6277	930	14	134	134	142	34	23	100	100	0	0.234	0.248	0.245	0.236	1.546	0.236	0.805	80	588	100	7860	7665	-2.097	1489	6371	1522	6143	125628
41	10	9	Hs~Ref:NM_138779.1~uORF:IOH10711~RFU:26437.87	HA20457~B41R09C10	4730	49390	110	1536	1510	589	39	53	53	110	109	99	100	98	0	1369	1343	107	7	285	285	285	37	12	100	100	0	1.368	1.377	1.422	1.236	1.658	1.601	0.720	80	567	100	2567	2515	0.452	1483	1084	1457	1058	120779
38	3	19	Hs~Ref:NM_006275.2~uORF:IOH3168~RFU:3219.87	HA20457~B38R19C03	7760	46840	110	1534	1643	532	32	56	56	204	246	120	100	100	0	2481	2482	173	6	295	295	284	134	47	100	100	0	0.676	0.726	0.696	0.687	1.467	0.636	0.708	80	546	100	3664	3774	-0.565	1478	2186	1587	2187	131426
40	22	22	AlexaAntiMouseAb~N/A	HA20457~B40R22C22	20610	47420	110	1534	1494	618	41	46	46	47	2	4	100	100	0	6184	6127	932	15	124	124	130	34	26	100	100	0	0.246	0.241	0.234	0.207	1.941	0.237	0.815	80	612	100	7548	7451	-2.026	1488	6060	1448	6003	119512
40	4	18	Hs~MGC:BC071909.1~uORF:IOH63092~RFU:8033.85	HA20457~B40R18C04	17010	46640	110	1534	1381	623	45	46	46	57	78	136	100	100	0	1492	1481	277	18	166	166	176	48	27	100	100	0	1.122	1.015	1.024	0.910	1.860	1.285	0.628	80	577	100	2814	2650	0.166	1488	1326	1335	1315	110449
41	3	12	Hs~MGC:BC034784.1~uORF:IOH22773~RFU:12596.73	HA20457~B41R12C03	3340	49980	110	1528	1542	595	38	47	47	52	37	71	100	100	0	1136	1117	147	13	196	196	219	77	35	100	100	0	1.576	1.623	1.590	1.515	1.427	1.905	0.767	80	578	100	2421	2416	0.656	1481	940	1495	921	123353
43	3	18	Hs~MGC:BC013879.1~N/A~RFU:5674.29	HA20457~B43R18C03	12310	51110	110	1527	1429	581	40	45	45	46	3	6	100	100	0	741	720	125	17	158	158	162	17	10	100	100	0	2.542	2.463	2.499	2.326	1.495	2.910	0.800	80	577	100	2065	1946	1.346	1482	583	1384	562	114289
32	21	8	Hs~Ref:NM_198965.1~uORF:IOH44500~RFU:2986.42	HA20457~B32R08C21	20330	35600	110	1526	1585	565	35	48	48	53	25	47	100	100	0	1178	1097	220	20	92	92	103	27	26	100	100	0	1.361	1.529	1.462	1.457	1.599	1.725	0.793	80	558	100	2564	2542	0.445	1478	1086	1537	1005	126778
48	20	22	ERa~N/A	HA20457~B48R22C20	20320	56420	110	1524	1496	493	32	119	119	204	218	106	100	100	0	1115	1127	100	8	336	336	346	405	117	98	42	0	1.804	1.741	1.644	1.646	1.463	1.265	0.218	80	589	100	2184	2168	0.851	1405	779	1377	791	119656
4	5	16	Hs~Ref:NM_002645.1~CAT:PV5586~RFU:6395.2	HA20457~B04R16C05	16990	5720	110	1524	1436	674	46	47	47	68	81	119	100	100	0	1423	1355	284	20	107	107	125	52	41	100	100	0	1.122	1.113	1.133	0.985	1.809	1.313	0.676	80	572	100	2793	2637	0.167	1477	1316	1389	1248	114871
16	20	7	Hs~MGC:BC021234.2~uORF:IOH13820~RFU:21140.25	HA20457~B16R07C20	20070	17410	110	1523	1531	618	40	47	47	53	53	100	100	100	0	1413	1343	153	11	93	93	93	10	10	100	100	0	1.118	1.187	1.125	1.084	1.671	1.338	0.686	80	532	100	2796	2734	0.161	1476	1320	1484	1250	122476
48	19	7	Hs~Ref:NM_002595.1~N/A~RFU:11802.46	HA20457~B48R07C19	20100	53420	110	1521	1410	552	39	45	45	47	12	25	100	100	0	871	897	151	16	111	111	114	18	15	100	100	0	1.942	1.737	1.629	1.576	1.530	1.977	0.821	80	568	100	2236	2151	0.958	1476	760	1365	786	112785
25	21	22	AlexaAntiMouseAb~N/A	HA20457~B25R22C21	6800	33970	110	1519	1279	897	70	47	47	67	93	138	78	73	0	6670	5482	2419	44	138	138	214	166	77	100	95	0	0.225	0.231	0.225	0.127	3.497	0.237	0.796	80	603	100	8004	6576	-2.150	1472	6532	1232	5344	102284
33	1	12	Hs~Ref:NM_002136.1~uORF:IOH3526~RFU:14482.89	HA20457~B33R12C01	2850	40940	110	1518	1661	704	42	51	51	136	174	127	100	100	0	1951	1936	98	5	319	319	329	106	32	100	100	0	0.899	0.996	0.928	0.899	1.580	1.017	0.608	80	580	100	3099	3227	-0.154	1467	1632	1610	1617	132885
12	22	22	AlexaAntiMouseAb~N/A	HA20457~B12R22C22	20440	15900	110	1518	1427	656	45	47	47	48	7	14	100	100	0	5974	5579	1298	23	133	133	179	99	55	100	100	0	0.252	0.253	0.253	0.225	1.788	0.244	0.765	80	629	100	7312	6826	-1.989	1471	5841	1380	5446	114147
35	21	16	Hs~MGC:BC012887.1~uORF:IOH25768~RFU:15338.43	HA20457~B35R16C21	15840	41700	110	1515	1622	564	34	47	47	56	75	133	100	100	0	2165	2176	157	7	133	133	148	121	81	100	100	0	0.722	0.771	0.768	0.720	1.534	0.773	0.710	80	556	100	3500	3618	-0.469	1468	2032	1575	2043	129799
13	21	5	Hs~Ref:NM_018956.2~uORF:IOH11209~RFU:39979.54	HA20457~B13R05C21	6730	17060	110	1515	1560	521	33	51	51	176	214	121	100	98	0	2350	2367	125	5	145	145	434	461	106	100	100	0	0.664	0.679	0.647	0.642	1.407	0.727	0.701	80	538	100	3669	3731	-0.591	1464	2205	1509	2222	124827
44	21	22	AlexaAntiMouseAb~N/A	HA20457~B44R22C21	20440	51880	110	1515	1485	626	42	47	47	62	105	169	98	98	0	6531	6369	902	14	123	123	155	80	51	100	100	0	0.229	0.230	0.230	0.203	1.723	0.220	0.750	80	580	100	7876	7684	-2.126	1468	6408	1438	6246	118830
45	22	7	Hs~Ref:NM_001616.2~N/A~RFU:17707.4	HA20457~B45R07C22	7080	53440	110	1511	1584	565	35	46	46	50	25	50	100	100	0	485	484	37	7	176	176	181	24	13	100	100	0	4.741	4.994	4.713	4.665	1.564	5.864	0.683	80	596	100	1774	1846	2.245	1465	309	1538	308	126689
35	12	18	Hs~Ref:NM_004465.1~uORF:IOH40262~RFU:4592.79	HA20457~B35R18C12	14050	42100	110	1511	1561	450	28	49	49	72	88	122	100	100	0	1429	1386	176	12	122	122	142	50	35	100	100	0	1.119	1.196	1.147	1.153	1.385	1.286	0.798	80	567	100	2769	2776	0.162	1462	1307	1512	1264	124868
37	18	6	Hs~MGC:BC031650.1~uORF:IOH22742~RFU:50775.11	HA20457~B37R06C18	6270	44280	110	1511	1448	447	30	52	52	132	159	120	100	100	0	1294	1298	87	6	213	213	259	150	57	100	100	0	1.350	1.287	1.369	1.214	1.470	1.292	0.699	80	547	100	2540	2481	0.433	1459	1081	1396	1085	115847
1	20	20	Hs~Ref:XM_003960444.1~uORF:IOH50171~RFU:35631	HA20457~B01R20C20	6470	6580	110	1507	1444	427	29	49	49	150	308	205	98	97	0	2288	2127	439	20	142	142	280	362	129	100	93	0	0.679	0.703	0.690	0.690	1.363	0.823	0.766	80	566	100	3604	3380	-0.558	1458	2146	1395	1985	115505
47	13	7	Hs~MGC:BC016987.1~uORF:IOH11787~RFU:9979.26	HA20457~B47R07C13	14370	53400	110	1505	1448	488	33	48	48	60	44	73	98	98	0	1284	1250	136	10	159	159	161	20	12	100	100	0	1.295	1.283	1.323	1.171	1.742	1.377	0.753	80	566	100	2582	2491	0.373	1457	1125	1400	1091	115818
22	8	6	Hs~Ref:NM_019067.1~uORF:IOH13693~RFU:21631	HA20457~B22R06C08	8630	26230	110	1504	1419	482	33	48	48	69	88	127	100	100	0	1578	1557	90	5	110	110	127	46	36	100	100	0	0.992	0.947	1.016	0.887	1.465	1.029	0.794	80	558	100	2924	2818	-0.012	1456	1468	1371	1447	113513
16	21	14	Hs~MGC:NM_152912.3~uORF:IOH26907~RFU:9373.36	HA20457~B16R14C21	20290	18800	110	1503	1615	629	38	48	48	51	26	50	100	100	0	1427	1365	231	16	99	99	105	35	33	100	100	0	1.096	1.238	1.123	1.155	1.543	1.388	0.743	80	575	100	2783	2833	0.132	1455	1328	1567	1266	129194
46	5	13	Hs~MGC:BC020729.1~uORF:IOH12978~RFU:9247.82	HA20457~B46R13C05	8220	54660	110	1503	1477	543	36	50	50	327	510	155	90	83	0	1103	1067	201	18	241	241	453	366	80	98	80	0	1.686	1.728	1.646	1.536	2.298	2.176	0.609	80	556	100	2315	2253	0.753	1453	862	1427	826	118137
8	20	4	Hs~Ref:NM_152716.1~uORF:IOH38079~RFU:32514.19	HA20457~B08R04C20	19970	7760	110	1502	1421	474	33	53	53	94	93	98	100	100	0	1097	1112	67	6	239	239	260	102	39	100	100	0	1.689	1.567	1.698	1.454	1.548	1.766	0.739	80	567	100	2307	2241	0.756	1449	858	1368	873	113664
14	6	9	Hs~Ref:NM_003135.1~uORF:IOH59899~RFU:8287.12	HA20457~B14R09C06	8170	17830	110	1499	1448	419	28	49	49	143	207	144	100	97	0	2453	2353	372	15	110	110	186	165	88	100	100	0	0.619	0.624	0.640	0.602	1.493	0.618	0.749	80	557	100	3793	3642	-0.692	1450	2343	1399	2243	115852
8	12	20	Hs~Ref:NM_001039724.1~uORF:IOH63165~RFU:24733.07	HA20457~B08R20C12	18390	10970	110	1498	1400	609	43	48	48	51	22	43	100	100	0	1011	1050	110	10	97	97	105	56	53	100	100	0	1.586	1.419	1.484	1.237	1.768	1.584	0.715	80	554	100	2364	2305	0.666	1450	914	1352	953	111971
43	3	7	Hs~Ref:NM_022063.1~uORF:IOH27864~RFU:12049.13	HA20457~B43R07C03	12290	48900	110	1496	1504	438	29	49	49	70	81	115	100	100	0	1580	1621	695	42	189	189	194	47	24	100	100	0	1.040	1.016	1.102	1.023	1.456	0.955	0.673	80	548	100	2838	2887	0.057	1447	1391	1455	1432	120323
46	15	2	Hs~MGC:BC057760.1~uORF:IOH29220~RFU:29493.45	HA20457~B46R02C15	10260	52450	110	1495	1497	412	27	50	50	179	247	137	100	96	0	1469	1548	297	19	225	225	357	261	73	100	100	0	1.162	1.094	1.114	1.068	1.371	1.168	0.643	80	565	100	2689	2770	0.216	1445	1244	1447	1323	119796
36	1	5	Hs~Ref:NM_152757.1~uORF:IOH43336~RFU:26064.41	HA20457~B36R05C01	16420	39490	110	1493	1514	559	36	47	47	47	6	12	100	100	0	734	729	125	17	126	126	161	64	39	100	100	0	2.378	2.433	2.342	2.295	1.460	2.896	0.798	80	590	100	2054	2070	1.250	1446	608	1467	603	121139
9	14	9	Hs~MGC:BC028711.2~uORF:IOH11814~RFU:22060.04	HA20457~B09R09C14	5310	13320	110	1493	1459	401	27	48	48	67	69	102	100	100	0	1289	1299	95	7	117	117	129	51	39	100	100	0	1.233	1.194	1.231	1.142	1.395	1.256	0.793	80	548	100	2617	2593	0.302	1445	1172	1411	1182	116748
1	17	20	Hs~Ref:NM_133430.1~uORF:IOH50108~RFU:51705.24	HA20457~B01R20C17	5870	6580	110	1486	1444	639	44	48	48	144	275	190	100	88	0	1624	1556	241	15	116	116	248	314	126	100	100	0	0.954	0.969	0.972	0.864	1.708	1.146	0.602	80	529	100	2946	2836	-0.069	1438	1508	1396	1440	115535
47	7	6	Hs~Ref:NM_017819.1~uORF:IOH45746~RFU:27050.22	HA20457~B47R06C07	13170	53210	110	1484	1584	515	32	46	46	49	28	57	100	100	0	982	979	117	11	170	170	173	23	13	100	100	0	1.771	1.901	1.936	1.814	1.406	2.207	0.840	80	566	100	2250	2347	0.825	1438	812	1538	809	126753
13	21	3	Hs~Ref:NM_012420.1~uORF:IOH22625~RFU:32436.76	HA20457~B13R03C21	6730	16660	110	1484	1448	611	42	48	48	58	36	62	100	100	0	522	519	33	6	156	156	154	38	24	100	100	0	3.923	3.857	3.968	3.411	1.712	4.711	0.750	80	584	100	1802	1763	1.972	1436	366	1400	363	115816
42	8	4	Hs~MGC:BC029378.1~uORF:IOH23186~RFU:32586.5	HA20457~B42R04C08	8770	48350	110	1483	1521	375	24	51	51	169	233	137	100	100	0	1808	1825	326	17	247	247	274	159	58	100	100	0	0.917	0.932	0.989	0.914	1.398	0.905	0.679	80	577	100	2993	3048	-0.124	1432	1561	1470	1578	121719
20	19	12	Hs~MGC:BC100926.1~uORF:IOH63370~RFU:25030.69	HA20457~B20R12C19	19860	22870	110	1481	1558	551	35	48	48	59	64	108	100	100	0	829	837	117	13	96	96	103	53	51	100	100	0	1.955	2.038	2.013	1.938	1.571	2.508	0.669	80	599	100	2166	2251	0.967	1433	733	1510	741	124641
33	17	3	Hs~MGC:BC040106.1~uORF:IOH26285~RFU:20527.29	HA20457~B33R03C17	6050	39130	110	1480	1527	624	40	47	47	53	44	83	100	100	0	1683	1688	145	8	120	120	125	34	27	100	100	0	0.917	0.944	0.912	0.865	1.532	1.042	0.746	80	558	100	2996	3048	-0.125	1433	1563	1480	1568	122146
36	13	4	Hs~MGC:BC025266.1~uORF:IOH23199~RFU:6.51	HA20457~B36R04C13	18810	39280	110	1480	1521	581	38	47	47	48	11	22	100	100	0	1397	1332	164	12	98	98	98	12	12	100	100	0	1.103	1.194	1.142	1.110	1.497	1.408	0.746	80	557	100	2732	2708	0.142	1433	1299	1474	1234	121688
45	13	13	Hs~Ref:NM_004060.2~uORF:IOH4393~RFU:12292.58	HA20457~B45R13C13	5270	54620	110	1478	1653	809	48	50	50	257	433	168	97	87	0	1038	1028	303	29	217	217	372	298	80	92	80	0	1.739	1.977	2.023	1.966	1.888	2.723	0.601	80	534	100	2249	2414	0.799	1428	821	1603	811	132279
45	10	3	Hs~Ref:NM_000999.2~uORF:IOH4263~RFU:16562.23	HA20457~B45R03C10	4680	52660	110	1478	1425	436	30	47	47	61	90	147	100	97	0	1034	997	127	12	230	230	229	51	22	100	100	0	1.780	1.797	1.822	1.688	1.638	1.941	0.756	80	575	100	2235	2145	0.832	1431	804	1378	767	113970
23	1	14	Hs~MGC:BC067735.1~uORF:IOH40060~RFU:43023.62	HA20457~B23R14C01	11760	27840	110	1476	1462	431	29	49	49	81	99	122	100	100	0	1548	1522	171	11	112	112	133	50	37	100	100	0	0.994	1.002	1.032	0.960	1.460	1.020	0.716	80	591	100	2863	2823	-0.009	1427	1436	1413	1410	116964
33	18	3	Hs~MGC:BC040106.1~uORF:IOH26285~RFU:24162.02	HA20457~B33R03C18	6250	39130	110	1473	1572	371	23	47	47	55	60	109	100	100	0	1750	1770	175	9	122	122	128	40	31	100	100	0	0.876	0.925	0.916	0.905	1.288	0.945	0.816	80	536	100	3054	3173	-0.191	1426	1628	1525	1648	125751
37	20	8	Hs~Ref:NM_000987.2~uORF:IOH45675~RFU:14116.44	HA20457~B37R08C20	6680	44680	110	1473	1475	491	33	50	50	82	98	119	100	100	0	1739	1794	434	24	190	190	186	61	32	100	100	0	0.919	0.888	0.880	0.851	1.464	0.873	0.691	80	546	100	2972	3029	-0.122	1423	1549	1425	1604	117967
19	18	17	Hs~MGC:BC001280.1~uORF:IOH21165~RFU:25925.76	HA20457~B19R17C18	15190	23910	110	1472	1490	472	31	50	50	73	72	98	100	100	0	861	881	87	9	118	118	134	47	35	100	100	0	1.914	1.887	1.944	1.786	1.480	2.065	0.653	80	562	100	2165	2203	0.936	1422	743	1440	763	119210
46	12	7	Hs~MGC:BC022816.1~uORF:IOH14672~RFU:41199.78	HA20457~B46R07C12	9620	53450	110	1471	1452	339	23	335	335	501	485	96	93	68	0	1741	1762	104	5	314	314	516	293	56	100	100	0	0.796	0.771	0.804	0.732	1.418	1.072	0.518	80	583	100	2563	2565	-0.329	1136	1427	1117	1448	116191
37	17	9	Hs~Ref:NM_080588.1~uORF:IOH46132~RFU:30959.61	HA20457~B37R09C17	6070	44880	110	1471	1366	555	40	58	58	134	163	121	100	100	0	1001	991	57	5	266	266	312	138	44	100	100	0	1.922	1.804	1.992	1.631	1.649	2.429	0.611	80	557	100	2148	2033	0.943	1413	735	1308	725	109307
11	2	6	Hs~Ref:NM_006924.3~uORF:IOH11039~RFU:3663.76	HA20457~B11R06C02	11860	12690	110	1470	1553	564	36	52	52	250	340	136	100	93	0	2656	2589	350	13	103	103	231	258	111	100	100	0	0.555	0.604	0.570	0.567	1.475	0.603	0.546	80	558	100	3971	3987	-0.848	1418	2553	1501	2486	124220
24	6	9	Hs~Ref:NM_001031.4~uORF:IOH58930~RFU:27743.68	HA20457~B24R09C06	17280	26820	110	1470	1505	448	29	49	49	83	99	119	100	100	0	719	723	147	20	118	118	129	34	26	100	100	0	2.364	2.407	2.348	2.385	1.546	2.865	0.665	80	566	100	2022	2061	1.241	1421	601	1456	605	120372
2	18	3	Hs~Ref:NM_201403.1~uORF:IOH42184~RFU:55250	HA20457~B02R03C18	10540	3160	110	1470	1502	514	34	83	83	373	432	115	98	86	0	1577	1599	91	5	211	211	497	447	89	100	100	0	1.015	1.022	0.966	0.955	1.514	1.103	0.557	80	550	100	2753	2807	0.022	1387	1366	1419	1388	120179
34	4	17	Hs~MGC:BC007289.1~uORF:IOH6909~RFU:2056.77	HA20457~B34R17C04	7920	41950	110	1469	1565	856	54	708	708	2100	3549	169	0	0	0	229	232	24	10	167	167	177	50	28	78	5	0	12.274	13.185	11.292	11.159	2.901	70.042	0.239	80	548	100	823	922	3.618	761	62	857	65	125191
11	16	2	Hs~MGC:BC007228.1~uORF:IOH6059~RFU:28470.05	HA20457~B11R02C16	14680	11880	110	1467	1577	662	41	50	50	101	197	195	100	97	0	2049	2053	140	6	109	109	135	82	60	100	100	0	0.730	0.785	0.771	0.700	1.732	0.845	0.709	80	557	100	3357	3471	-0.453	1417	1940	1527	1944	126168
47	8	6	Hs~Ref:NM_017819.1~uORF:IOH45746~RFU:27884.28	HA20457~B47R06C08	13360	53210	110	1466	1520	518	34	46	46	58	43	74	100	100	0	1001	993	91	9	176	176	197	50	25	100	100	0	1.721	1.804	1.658	1.696	1.542	2.104	0.725	80	566	100	2245	2291	0.783	1420	825	1474	817	121575
6	20	19	Hs~MGC:BC028120.1~uORF:IOH11613~RFU:8185.59	HA20457~B06R19C20	10990	10840	110	1463	1464	449	30	47	47	56	65	116	100	100	0	1225	1177	118	10	94	94	107	64	59	100	100	0	1.252	1.308	1.270	1.249	1.407	1.446	0.774	80	575	100	2547	2500	0.324	1416	1131	1417	1083	117100
15	12	2	Hs~Ref:NM_002391.1~uORF:IOH13794~RFU:20215.07	HA20457~B15R02C12	13950	16400	110	1463	1424	573	40	48	48	51	22	43	100	100	0	1056	1065	76	7	91	91	95	20	21	100	100	0	1.466	1.413	1.486	1.280	1.573	1.590	0.723	80	562	100	2380	2350	0.552	1415	965	1376	974	113886
23	6	8	Hs~Ref:NM_017593.2~N/A~RFU:15293.67	HA20457~B23R08C06	12750	26630	110	1462	1594	667	41	49	49	84	140	166	100	100	0	509	511	21	4	124	124	132	38	28	100	100	0	3.670	3.992	3.680	3.631	1.597	5.814	0.606	80	548	100	1798	1932	1.876	1413	385	1545	387	127483
18	19	14	Hs~MGC:BC009851.1~uORF:IOH12351~RFU:29507.07	HA20457~B18R14C19	10850	23320	110	1461	1725	727	42	51	51	154	195	126	100	100	0	2011	1994	158	7	127	127	202	118	58	100	100	0	0.748	0.897	0.748	0.820	1.500	0.980	0.727	80	568	100	3294	3541	-0.418	1410	1884	1674	1867	137973
20	1	20	Hs~MGC:BC000535.1~uORF:IOH4145~RFU:8791.48	HA20457~B20R20C01	16260	24490	110	1461	1477	371	25	49	49	56	36	64	100	100	0	1236	1223	142	11	101	101	105	18	17	100	100	0	1.244	1.273	1.288	1.242	1.370	1.522	0.737	80	590	100	2547	2550	0.315	1412	1135	1428	1122	118188
10	3	4	Hs~Ref:NM_003278.1~uORF:IOH14450~RFU:21954.15	HA20457~B10R04C03	7570	12330	110	1457	1517	506	33	50	50	68	62	91	100	100	0	1012	1018	86	8	137	137	155	61	39	100	100	0	1.608	1.665	1.523	1.564	1.508	1.857	0.746	80	558	100	2282	2348	0.685	1407	875	1467	881	121377
21	14	4	Hs~Ref:NM_020661.1~uORF:IOH6382~RFU:8386.46	HA20457~B21R04C14	5370	25850	110	1456	1577	566	35	48	48	51	25	49	100	100	0	992	975	134	13	110	110	113	20	17	100	100	0	1.596	1.768	1.613	1.669	1.519	2.064	0.774	80	559	100	2290	2394	0.675	1408	882	1529	865	126180
47	1	9	Hs~Ref:NM_152770.1~uORF:IOH22874~RFU:18298.03	HA20457~B47R09C01	11970	53810	110	1456	1493	503	33	46	46	54	35	64	100	100	0	761	753	38	5	183	183	183	21	11	100	100	0	2.439	2.539	2.469	2.362	1.499	2.907	0.763	80	570	100	1988	2017	1.287	1410	578	1447	570	119439
21	13	4	Hs~Ref:NM_020661.1~uORF:IOH6382~RFU:8896.02	HA20457~B21R04C13	5170	25850	110	1456	1460	602	41	48	48	51	37	72	100	100	0	1017	1005	122	12	108	108	111	22	19	100	100	0	1.549	1.574	1.522	1.435	1.566	1.940	0.739	80	568	100	2317	2309	0.631	1408	909	1412	897	116837
20	9	16	Hs~Ref:NM_175072.1~uORF:IOH59828~RFU:40625.55	HA20457~B20R16C09	17840	23680	110	1456	1450	720	49	54	54	282	426	151	93	68	0	1364	1346	157	11	120	120	241	226	93	100	100	0	1.127	1.139	1.160	0.970	1.772	1.395	0.665	80	584	100	2646	2622	0.172	1402	1244	1396	1226	116034
42	2	17	Hs~Ref:NM_005720.1~uORF:IOH3992~RFU:20435.27	HA20457~B42R17C02	7600	50930	110	1453	1621	575	35	83	83	275	382	138	100	96	0	785	791	86	10	174	174	207	122	58	100	100	0	2.242	2.493	2.286	2.360	1.494	3.031	0.549	80	590	100	1981	2155	1.165	1370	611	1538	617	129644
29	7	7	Hs~MGC:BC021278.1~uORF:IOH14591~RFU:2972.71	HA20457~B29R07C07	4060	35440	110	1452	1739	1294	74	47	47	49	20	40	100	100	0	276	280	36	12	119	119	121	10	8	100	100	0	8.949	10.509	9.288	8.882	1.768	17.068	0.559	80	565	100	1562	1853	3.162	1405	157	1692	161	139080
6	18	19	Hs~Ref:NM_144602.1~uORF:IOH11852~RFU:8162.66	HA20457~B06R19C18	10590	10850	110	1452	1580	663	41	47	47	59	60	101	100	100	0	1825	1706	252	14	98	98	112	79	70	100	100	0	0.814	0.953	0.939	0.878	1.561	1.134	0.742	80	556	100	3132	3141	-0.298	1405	1727	1533	1608	126398
3	12	3	Hs~MGC:BC013352.1~uORF:IOH14736~RFU:30148.47	HA20457~B03R03C12	13830	3120	110	1449	1494	439	29	49	49	92	113	122	100	100	0	1147	1139	116	10	108	108	168	102	60	100	100	0	1.347	1.402	1.396	1.341	1.409	1.545	0.683	80	577	100	2439	2476	0.430	1400	1039	1445	1031	119508
2	8	13	Hs~MGC:BC096708.1~uORF:IOH63336~RFU:21476.93	HA20457~B02R13C08	8550	5180	110	1445	1489	395	26	47	47	65	82	126	100	100	0	1949	1954	116	5	143	143	147	30	20	100	100	0	0.774	0.796	0.776	0.768	1.324	0.884	0.752	80	558	100	3204	3253	-0.369	1398	1806	1442	1811	119130
4	5	13	Hs~MGC:BC094726.1~uORF:IOH62681~RFU:21740.17	HA20457~B04R13C05	16990	5110	110	1443	1453	420	28	48	48	74	84	113	100	100	0	660	678	79	11	125	125	150	58	38	100	100	0	2.607	2.541	2.533	2.438	1.430	3.009	0.698	80	584	100	1930	1958	1.383	1395	535	1405	553	116248
40	5	12	Hs~Ref:NM_007285.5~uORF:IOH7450~RFU:6992.19	HA20457~B40R12C05	17180	45410	110	1443	1429	543	37	47	47	121	210	173	98	96	0	1930	2048	472	23	153	153	241	211	87	100	100	0	0.786	0.729	0.785	0.678	1.653	0.502	0.492	80	553	100	3173	3277	-0.348	1396	1777	1382	1895	114290
21	1	4	Hs~MGC:BC030702.1~uORF:IOH22356~RFU:25872.27	HA20457~B21R04C01	2770	25860	110	1442	1514	408	26	48	48	55	88	160	100	100	0	1477	1491	122	8	123	123	127	26	20	100	100	0	1.030	1.072	1.005	1.032	1.426	1.213	0.700	80	588	100	2748	2834	0.042	1394	1354	1466	1368	121107
1	17	5	Hs~Ref:NM_003516.2~uORF:IOH4867~RFU:9720.05	HA20457~B01R05C17	5840	3560	110	1441	1431	556	38	46	46	48	21	43	100	100	0	1779	1712	219	12	107	107	109	12	11	100	100	0	0.834	0.863	0.870	0.779	1.706	0.971	0.752	80	548	100	3067	2990	-0.261	1395	1672	1385	1605	114450
46	11	7	Hs~MGC:BC022816.1~uORF:IOH14672~RFU:42163.76	HA20457~B46R07C11	9430	53460	110	1440	1521	423	27	138	138	381	515	135	100	72	0	1831	1821	102	5	272	272	456	315	69	100	100	0	0.835	0.893	0.830	0.856	1.331	1.108	0.638	80	516	100	2861	2932	-0.260	1302	1559	1383	1549	121692
9	17	16	Hs~Ref:NM_001008896.1~uORF:IOH50198~RFU:14890.83	HA20457~B09R16C17	5930	14730	110	1438	1718	818	47	49	49	105	535	509	96	81	0	712	714	71	9	101	101	117	51	43	100	100	0	2.273	2.723	2.299	2.408	1.783	4.117	0.506	80	576	100	2000	2282	1.185	1389	611	1669	613	137428
44	21	7	Hs~MGC:BC065731.1~uORF:IOH62864~RFU:20345.98	HA20457~B44R07C21	20420	48870	110	1437	1330	506	38	46	46	47	23	48	100	100	0	1036	1026	115	11	111	111	111	12	10	100	100	0	1.504	1.403	1.412	1.290	1.519	1.649	0.733	80	586	100	2316	2199	0.589	1391	925	1284	915	106408
16	15	6	Hs~Ref:NM_003287.2~uORF:IOH59709~RFU:15451.97	HA20457~B16R06C15	19070	17210	110	1436	1946	1216	62	6136	6136	6876	6023	87	0	0	0	233	238	27	11	173	173	167	73	43	42	1	0	-78.333	-64.462	14.366	14.366	1.000	148.398	0.274	80	558	100	-4640	-4125	Error	-4700	60	-4190	65	155718
13	22	5	Hs~Ref:NM_018956.2~uORF:IOH11209~RFU:40030.69	HA20457~B13R05C22	6920	17070	110	1436	1620	519	32	50	50	225	299	132	100	100	0	2299	2260	234	10	127	127	417	466	111	100	100	0	0.638	0.736	0.649	0.703	1.375	0.733	0.729	80	590	100	3558	3703	-0.648	1386	2172	1570	2133	129587
18	20	14	Hs~MGC:BC009851.1~uORF:IOH12351~RFU:29698.66	HA20457~B18R14C20	11040	23320	110	1434	1524	509	33	51	51	155	217	140	98	98	0	2101	2026	264	13	125	125	184	111	60	100	100	0	0.700	0.775	0.717	0.718	1.547	0.858	0.671	80	545	100	3359	3374	-0.515	1383	1976	1473	1901	121895
45	21	15	Hs~Ref:NM_001031812.2~CAT:PV3838~RFU:16307.66	HA20457~B45R15C21	6900	55040	110	1433	1406	1166	82	47	47	57	53	92	80	77	0	445	438	162	36	173	173	179	32	17	88	82	0	5.096	5.128	5.438	2.638	4.568	6.590	0.782	80	576	100	1658	1624	2.349	1386	272	1359	265	112510
45	17	3	Hs~Ref:NM_012396.1~uORF:IOH12626~RFU:36499.26	HA20457~B45R03C17	6070	52630	110	1430	1495	625	41	50	50	179	321	179	97	87	0	1226	1215	135	11	214	214	255	110	43	100	100	0	1.364	1.444	1.446	1.291	1.686	2.111	0.662	80	577	100	2392	2446	0.447	1380	1012	1445	1001	119563
32	18	19	Hs~MGC:BC070154.1~uORF:IOH63011~RFU:14175.04	HA20457~B32R19C18	19750	37770	110	1429	1426	602	42	47	47	49	22	44	100	100	0	1276	1269	205	16	78	78	82	18	21	100	100	0	1.154	1.158	1.107	1.056	1.535	1.271	0.786	80	548	100	2580	2570	0.206	1382	1198	1379	1191	114041
47	20	5	Hs~MGC:BC014131.1~uORF:IOH12938~RFU:10225.98	HA20457~B47R05C20	15750	52990	110	1429	1304	635	48	49	49	221	334	151	90	82	0	585	557	126	22	185	185	484	1419	293	0	0	0	3.450	3.374	3.239	2.767	2.453	3.905	0.391	80	579	100	1780	1627	1.787	1380	400	1255	372	104326
9	18	17	Hs~Ref:NM_001786.2~uORF:IOH14583~RFU:7490.17	HA20457~B09R17C18	6120	14920	110	1428	1535	715	46	50	50	76	75	98	100	100	0	642	654	53	8	109	109	113	34	30	100	100	0	2.585	2.725	2.646	2.475	1.554	3.513	0.698	80	576	100	1911	2030	1.370	1378	533	1485	545	122825
40	4	10	Hs~Ref:NM_016139.2~uORF:IOH3869~RFU:37837.61	HA20457~B40R10C04	16990	45020	110	1428	1523	502	32	46	46	52	37	71	100	100	0	733	717	88	12	140	140	145	25	17	100	100	0	2.331	2.560	2.253	2.458	1.446	3.163	0.678	80	561	100	1975	2054	1.221	1382	593	1477	577	121802
40	21	22	AlexaAntiMouseAb~N/A	HA20457~B40R22C21	20410	47430	110	1428	1340	397	29	47	47	48	30	62	98	98	0	6387	6278	1072	17	121	121	129	30	23	100	100	0	0.220	0.210	0.216	0.193	1.933	0.202	0.875	80	594	100	7647	7450	-2.182	1381	6266	1293	6157	107181
23	2	10	Hs~Ref:NM_005663.2~uORF:IOH46152~RFU:49355.9	HA20457~B23R10C02	11950	27030	110	1427	1471	351	23	50	50	145	220	151	100	100	0	1256	1543	963	62	113	113	228	244	107	100	100	0	1.205	0.994	1.230	1.065	1.541	0.865	0.506	80	594	100	2520	2851	0.269	1377	1143	1421	1430	117668
19	16	13	Hs~Ref:NM_001564.1~uORF:IOH22913~RFU:13048.03	HA20457~B19R13C16	14780	23110	110	1424	1470	438	29	49	49	98	127	129	100	100	0	1572	1562	106	6	104	104	136	59	43	100	100	0	0.937	0.975	0.902	0.938	1.300	1.106	0.753	80	576	100	2843	2879	-0.094	1375	1468	1421	1458	117566
46	1	16	Hs~Ref:NM_020168.3~CAT:PV3502~RFU:227.86	HA20457~B46R16C01	7430	55260	110	1422	1339	643	48	46	46	51	29	56	98	98	0	1149	1183	312	26	178	178	192	40	20	100	100	0	1.417	1.287	1.400	1.084	2.354	1.469	0.641	80	599	100	2347	2298	0.503	1376	971	1293	1005	107141
12	21	22	AlexaAntiMouseAb~N/A	HA20457~B12R22C21	20230	15900	110	1421	1388	649	46	48	48	79	107	135	98	93	0	5918	5362	1356	25	148	148	190	100	52	100	100	0	0.238	0.257	0.243	0.229	1.669	0.261	0.807	80	596	100	7143	6554	-2.071	1373	5770	1340	5214	111035
11	4	20	Hs~Ref:NM_016483.3~uORF:IOH22255~RFU:11240.17	HA20457~B11R20C04	12300	15480	110	1420	1473	428	29	47	47	53	39	73	100	100	0	1623	1612	112	6	88	88	94	31	32	100	100	0	0.894	0.936	0.915	0.898	1.346	0.988	0.794	80	568	100	2908	2950	-0.161	1373	1535	1426	1524	117878
10	21	3	Hs~MGC:BC009762.2~uORF:IOH14113~RFU:10853.79	HA20457~B10R03C21	11170	12120	110	1419	1448	499	34	49	49	67	61	91	100	100	0	1020	1018	96	9	122	122	149	59	39	100	100	0	1.526	1.561	1.546	1.446	1.553	1.789	0.771	80	577	100	2268	2295	0.609	1370	898	1399	896	115801
48	1	21	Hs~Ref:NM_020762.1~uORF:IOH29044~RFU:30450.87	HA20457~B48R21C01	16520	56240	110	1418	1544	634	41	73	73	161	168	104	100	98	0	824	829	60	7	301	301	325	173	53	100	98	0	2.572	2.786	2.819	2.513	1.594	3.252	0.553	80	580	100	1868	1999	1.363	1345	523	1471	528	123505
20	1	5	Hs~Ref:NM_080911.1~uORF:IOH43486~RFU:60007.64	HA20457~B20R05C01	16240	21490	110	1417	1516	442	29	305	305	385	384	99	98	90	0	1714	1753	155	8	341	341	339	239	70	100	100	0	0.810	0.858	0.811	0.812	1.423	0.968	0.669	80	590	100	2485	2623	-0.304	1112	1373	1211	1412	121275
32	3	15	Hs~MGC:BC007888.1~uORF:IOH29315~RFU:9719.43	HA20457~B32R15C03	16740	37020	110	1416	1496	664	44	47	47	47	7	14	100	100	0	891	812	198	24	108	108	109	13	11	100	100	0	1.748	2.058	1.819	1.990	1.704	2.418	0.702	80	552	100	2152	2153	0.806	1369	783	1449	704	119651
43	19	16	Hs~Ref:NM_003769.2~uORF:IOH41184~RFU:6773.62	HA20457~B43R16C19	15500	50690	110	1413	1409	409	29	54	54	122	134	109	100	100	0	2143	2157	310	14	238	238	227	100	44	100	100	0	0.713	0.706	0.677	0.685	1.308	0.627	0.793	80	577	100	3264	3274	-0.487	1359	1905	1355	1919	112703
23	15	15	Hs~Ref:NM_152619.1~CAT:PV4297~RFU:18096.07	HA20457~B23R15C15	14560	28030	110	1411	1548	625	40	49	49	104	136	130	100	100	0	213	211	29	13	114	114	153	66	43	82	13	0	13.758	15.454	14.298	14.905	1.493	20.726	0.337	80	592	100	1461	1596	3.782	1362	99	1499	97	123829
9	22	22	AlexaAntiMouseAb~N/A	HA20457~B09R22C22	6930	15930	110	1411	1487	499	33	47	47	47	2	4	100	100	0	6419	5679	1404	24	100	100	112	36	32	100	100	0	0.216	0.258	0.245	0.248	1.574	0.252	0.863	80	628	100	7683	7019	-2.212	1364	6319	1440	5579	118984
15	19	18	Hs~Ref:NM_015978.1~N/A~RFU:13110.26	HA20457~B15R18C19	15380	19600	110	1411	1360	486	35	47	47	48	24	50	100	100	0	427	434	36	8	84	84	86	19	22	100	100	0	3.977	3.751	3.902	3.494	1.466	4.235	0.735	80	573	100	1707	1663	1.992	1364	343	1313	350	108783
2	6	9	Hs~MGC:BC069023.1~uORF:IOH40776~RFU:3790.39	HA20457~B02R09C06	8150	4370	110	1410	1388	505	36	48	48	48	3	6	100	100	0	1014	988	156	15	122	122	123	10	8	100	100	0	1.527	1.547	1.468	1.421	1.662	1.804	0.755	80	556	100	2254	2206	0.611	1362	892	1340	866	111006
1	18	14	Hs~Ref:NM_198483.1~uORF:IOH42754~RFU:18329.61	HA20457~B01R14C18	6060	5360	110	1410	1371	406	29	48	48	53	24	45	100	98	0	1434	1418	146	10	121	121	131	33	25	100	100	0	1.037	1.020	0.983	0.952	1.633	1.067	0.795	80	580	100	2675	2620	0.053	1362	1313	1323	1297	109704
17	14	12	Hs~Ref:NM_032338.2~uORF:IOH7537~RFU:9093.89	HA20457~B17R12C14	5320	22980	110	1409	1496	394	26	48	48	49	15	30	100	100	0	1688	1665	218	13	105	105	107	14	13	100	100	0	0.860	0.928	0.934	0.900	1.355	0.927	0.833	80	583	100	2944	3008	-0.218	1361	1583	1448	1560	119682
18	12	4	Hs~Ref:NM_016304.2~uORF:IOH7552~RFU:19492.36	HA20457~B18R04C12	9430	21320	110	1408	1553	492	31	51	51	118	161	136	100	100	0	2193	2169	262	12	134	134	148	66	44	100	100	0	0.659	0.738	0.699	0.707	1.429	0.855	0.647	80	536	100	3416	3537	-0.602	1357	2059	1502	2035	124226
9	16	8	Hs~Ref:NM_018105.1~uORF:IOH10776~RFU:9486.61	HA20457~B09R08C16	5710	13120	110	1406	1507	452	29	47	47	50	21	42	100	100	0	1438	1418	146	10	96	96	104	27	25	100	100	0	1.013	1.104	1.000	1.058	1.440	1.142	0.743	80	567	100	2701	2782	0.018	1359	1342	1460	1322	120556
14	2	10	Hs~Ref:NM_004286.2~uORF:IOH14552~RFU:32096.35	HA20457~B14R10C02	7390	18040	110	1406	1458	502	34	51	51	230	648	281	100	55	0	1704	1677	185	11	113	113	181	136	75	100	100	0	0.852	0.900	0.842	0.852	1.429	3.496	0.107	80	583	100	2946	2971	-0.232	1355	1591	1407	1564	116669
34	22	22	AlexaAntiMouseAb~N/A	HA20457~B34R22C22	11510	42930	110	1406	1273	1101	86	48	48	69	118	171	73	66	0	7656	5444	3317	60	157	157	299	602	201	77	75	0	0.181	0.232	0.189	0.128	3.442	0.239	0.765	80	592	100	8857	6512	-2.465	1358	7499	1225	5287	101878
21	22	2	Hs~Ref:XM_088679.2~uORF:IOH43003~RFU:10710.7	HA20457~B21R02C22	6970	25440	110	1403	1443	579	40	50	50	104	130	125	100	100	0	2659	2623	238	9	293	293	280	144	51	100	100	0	0.572	0.598	0.558	0.547	1.557	0.579	0.705	80	580	100	3719	3723	-0.806	1353	2366	1393	2330	115432
36	19	2	Hs~MGC:BC001370.2~uORF:IOH3980~RFU:57699.96	HA20457~B36R02C19	20020	38870	110	1401	1480	416	28	48	48	64	90	140	100	100	0	997	993	86	8	81	81	102	62	60	100	100	0	1.477	1.570	1.591	1.514	1.357	1.908	0.769	80	564	100	2269	2344	0.563	1353	916	1432	912	118407
20	4	4	Hs~Ref:NM_006007.1~uORF:IOH14289~RFU:37701.97	HA20457~B20R04C04	16840	21290	110	1400	1480	456	30	50	50	95	121	127	100	100	0	681	682	46	6	100	100	140	68	48	100	100	0	2.324	2.457	2.435	2.357	1.357	3.329	0.711	80	558	100	1931	2012	1.216	1350	581	1430	582	118422
30	16	2	Hs~MGC:NM_174942.1~uORF:IOH26291~RFU:11516.93	HA20457~B30R02C16	10290	34460	110	1399	1417	566	39	47	47	54	40	74	100	100	0	1419	1404	126	8	109	109	111	10	9	100	100	0	1.032	1.058	1.040	0.959	1.667	1.263	0.723	80	585	100	2662	2665	0.046	1352	1310	1370	1295	113333
31	3	13	Hs~MGC:BC016609.1~uORF:IOH11216~RFU:35239.96	HA20457~B31R13C03	12200	36630	110	1399	1345	380	28	47	47	53	50	94	100	100	0	456	451	28	6	105	105	105	8	7	100	100	0	3.852	3.751	3.912	3.582	1.428	4.435	0.812	80	558	100	1703	1644	1.946	1352	351	1298	346	107608
17	3	10	Hs~Ref:NM_078467.1~uORF:IOH4470~RFU:22255.46	HA20457~B17R10C03	3120	22580	110	1397	1412	525	37	47	47	130	648	498	91	53	0	1037	1007	94	9	116	116	117	12	10	100	100	0	1.466	1.532	1.500	1.413	1.651	1.956	0.598	80	586	100	2271	2256	0.552	1350	921	1365	891	112993
29	2	18	Hs~MGC:BC016582.1~uORF:IOH9793~RFU:11310.04	HA20457~B29R18C02	3070	37650	110	1395	1592	665	41	47	47	56	40	71	100	100	0	592	574	57	9	138	138	140	16	11	100	100	0	2.969	3.544	3.222	3.271	1.555	4.659	0.665	80	566	100	1802	1981	1.570	1348	454	1545	436	127378
17	6	17	Hs~MGC:BC003408.2~uORF:IOH3031~RFU:6863.54	HA20457~B17R17C06	3730	23980	110	1395	1484	766	51	49	49	69	274	397	100	88	0	632	640	93	14	114	114	114	15	13	100	100	0	2.598	2.728	2.629	2.407	1.692	3.968	0.699	80	558	100	1864	1961	1.378	1346	518	1435	526	118701
40	3	18	Hs~MGC:BC071909.1~uORF:IOH63092~RFU:8378.91	HA20457~B40R18C03	16810	46640	110	1392	1487	510	34	46	46	53	43	81	100	100	0	1446	1395	246	17	180	180	187	37	19	100	100	0	1.063	1.186	1.174	1.142	1.426	1.309	0.795	80	577	100	2612	2656	0.088	1346	1266	1441	1215	118967
14	15	3	Hs~Ref:NM_173080.1~uORF:IOH34934~RFU:35657.55	HA20457~B14R03C15	9970	16640	110	1391	1531	529	34	52	52	146	165	113	100	98	0	1331	1419	307	21	150	150	173	83	47	100	100	0	1.134	1.165	1.171	1.101	1.581	1.233	0.660	80	559	100	2520	2748	0.181	1339	1181	1479	1269	122512
23	13	8	Hs~MGC:BC014394.1~uORF:IOH22936~RFU:42915.94	HA20457~B23R08C13	14160	26620	110	1391	1430	483	33	49	49	76	116	152	100	100	0	905	920	85	9	103	103	144	163	113	100	100	0	1.673	1.690	1.690	1.590	1.533	1.911	0.730	80	576	100	2144	2198	0.743	1342	802	1381	817	114405
33	18	13	Hs~Ref:NM_199131.1~uORF:IOH35218~RFU:9767.49	HA20457~B33R13C18	6240	41130	110	1390	1473	454	30	46	46	60	54	90	100	100	0	1236	1245	234	18	143	143	4639	13758	296	0	0	0	1.230	1.295	1.333	1.259	1.408	-0.004	0.005	80	556	100	2437	2529	0.298	1344	1093	1427	1102	117852
26	8	10	Hs~MGC:BC057774.1~uORF:IOH29168~RFU:23492.36	HA20457~B26R10C08	8710	31570	110	1390	1429	300	20	48	48	50	16	32	100	100	0	1603	1646	222	13	107	107	114	31	27	100	100	0	0.897	0.897	0.879	0.882	1.299	0.904	0.792	80	590	100	2838	2920	-0.157	1342	1496	1381	1539	114322
45	18	12	Hs~Ref:NM_002714.2~uORF:IOH39632~RFU:18693.27	HA20457~B45R12C18	6280	54450	110	1388	1411	631	44	46	46	53	34	64	100	100	0	1151	1420	668	47	203	203	239	82	34	100	100	0	1.416	1.122	1.295	1.091	2.186	1.139	0.382	80	545	100	2290	2582	0.501	1342	948	1365	1217	112881
12	11	16	Hs~Ref:NM_182770.1~uORF:IOH53444~RFU:24295.01	HA20457~B12R16C11	18230	14710	110	1388	1352	444	32	49	49	1250	6961	556	0	0	0	595	594	46	7	101	101	109	35	32	100	100	0	2.711	2.643	2.731	2.494	1.487	3.111	0.676	80	575	100	1833	1796	1.439	1339	494	1303	493	108187
41	16	20	Hs~Ref:NM_152652.1~uORF:IOH41534~RFU:13649.55	HA20457~B41R20C16	5940	51570	110	1388	1333	592	44	46	46	47	10	21	98	98	0	1263	1215	249	20	166	166	173	24	13	100	100	0	1.223	1.227	1.274	1.017	2.421	1.406	0.812	80	566	100	2439	2336	0.291	1342	1097	1287	1049	106612
40	6	9	Hs~Ref:NM_003527.4~uORF:IOH58710~RFU:12841.7	HA20457~B40R09C06	17390	44810	110	1387	1307	400	30	46	46	51	50	98	100	100	0	1252	1220	172	14	126	126	127	18	14	100	100	0	1.191	1.153	1.201	1.099	1.544	1.328	0.744	80	535	100	2467	2355	0.252	1341	1126	1261	1094	104521
33	4	5	Hs~MGC:BC000381.2~uORF:IOH3454~RFU:14753.28	HA20457~B33R05C04	3450	39540	110	1386	1518	568	37	69	69	145	154	106	100	100	0	2228	2194	114	5	356	356	349	160	45	100	100	0	0.704	0.788	0.765	0.732	1.481	0.798	0.685	80	537	100	3189	3287	-0.507	1317	1872	1449	1838	121457
31	20	20	Hs~MGC:BC056904.1~uORF:IOH29048~RFU:3838.43	HA20457~B31R20C20	15610	38030	110	1386	1320	349	26	46	46	48	27	56	100	100	0	972	937	175	18	126	126	127	12	9	100	100	0	1.584	1.571	1.518	1.534	1.552	1.728	0.789	80	571	100	2186	2085	0.664	1340	846	1274	811	105632
40	18	7	Hs~Ref:NM_004217.1~N/A~RFU:31660.48	HA20457~B40R07C18	19790	44400	110	1384	1380	526	38	46	46	55	62	112	100	100	0	1786	1799	97	5	113	113	119	34	28	100	100	0	0.800	0.791	0.786	0.730	1.523	0.780	0.691	80	566	100	3011	3020	-0.322	1338	1673	1334	1686	110433
34	9	8	Hs~Ref:NM_003908.1~uORF:IOH3554~RFU:4232.7	HA20457~B34R08C09	8920	40150	110	1384	1332	379	28	50	50	136	172	126	100	100	0	524	516	79	15	135	135	220	123	55	100	93	0	3.429	3.365	3.446	3.267	1.416	4.310	0.601	80	566	100	1723	1663	1.778	1334	389	1282	381	106583
44	20	20	Hs~Ref:NM_180981.1~uORF:IOH50087~RFU:6836.24	HA20457~B44R20C20	20270	51480	110	1383	1366	359	26	48	48	67	71	105	100	100	0	916	928	133	14	113	113	128	46	35	100	100	0	1.663	1.617	1.579	1.573	1.343	1.727	0.724	80	550	100	2138	2133	0.733	1335	803	1318	815	109294
46	17	13	Hs~Ref:NM_023080.1~uORF:IOH13369~RFU:10480.84	HA20457~B46R13C17	10640	54650	110	1381	1463	568	38	49	49	136	165	121	100	100	0	2321	2283	335	14	209	209	243	73	30	100	100	0	0.631	0.682	0.629	0.643	1.521	0.732	0.706	80	567	100	3444	3488	-0.665	1332	2112	1414	2074	117041
8	19	4	Hs~Ref:NM_152716.1~uORF:IOH38079~RFU:31116.81	HA20457~B08R04C19	19780	7760	110	1381	1376	542	39	59	59	121	119	98	96	93	0	1012	1008	72	7	311	311	301	92	30	100	100	0	1.886	1.890	1.937	1.625	1.985	2.149	0.641	80	574	100	2023	2014	0.915	1322	701	1317	697	110089
24	5	9	Hs~Ref:NM_001031.4~uORF:IOH58930~RFU:29342.45	HA20457~B24R09C05	17080	26820	110	1381	1346	399	29	49	49	74	71	95	100	100	0	754	700	162	23	127	127	136	42	30	100	100	0	2.124	2.264	2.075	2.254	1.668	2.911	0.610	80	575	100	1959	1870	1.087	1332	627	1297	573	107697
2	10	3	Hs~Ref:NM_015607.2~uORF:IOH41553~RFU:911.46	HA20457~B02R03C10	8940	3170	110	1381	1263	940	74	49	49	61	49	80	81	81	0	955	916	512	55	132	132	160	57	35	97	91	0	1.618	1.548	1.498	0.802	7.859	1.883	0.659	80	574	100	2155	1998	0.695	1332	823	1214	784	101064
43	4	15	Hs~Ref:NM_018189.2~uORF:IOH45471~RFU:10355.9	HA20457~B43R15C04	12500	50500	110	1380	1439	481	33	47	47	159	269	169	100	98	0	1387	1330	196	14	155	155	227	151	66	100	100	0	1.082	1.185	1.161	1.123	1.434	1.369	0.797	80	575	100	2565	2567	0.114	1333	1232	1392	1175	115081
1	2	11	AlexaAntiMouseAb~N/A	HA20457~B01R11C02	2850	4780	110	1378	1342	720	53	47	47	48	27	56	96	95	0	8290	8204	907	11	135	135	151	45	29	100	100	0	0.163	0.160	0.158	0.114	3.107	0.159	0.698	80	554	100	9486	9364	-2.615	1331	8155	1295	8069	107389
20	20	12	Hs~MGC:BC100926.1~uORF:IOH63370~RFU:24936.68	HA20457~B20R12C20	20060	22880	110	1377	1329	363	27	49	49	60	60	100	100	100	0	828	814	92	11	103	103	110	38	34	100	100	0	1.832	1.800	1.876	1.729	1.459	2.453	0.612	80	577	100	2053	1991	0.873	1328	725	1280	711	106291
16	15	17	Hs~Ref:NM_022048.1~uORF:IOH21026~RFU:19006.7	HA20457~B16R17C15	19080	19410	110	1374	1350	625	46	49	49	58	33	56	100	100	0	628	603	88	14	96	96	117	43	36	100	100	0	2.491	2.566	2.395	2.226	1.644	3.350	0.750	80	555	100	1857	1808	1.316	1325	532	1301	507	107986
4	17	12	Hs~MGC:NM_152653.1~uORF:IOH13176~RFU:28942.14	HA20457~B04R12C17	19410	4930	110	1372	1335	574	42	220	220	371	393	105	88	67	0	947	902	145	16	464	464	450	274	60	85	15	0	2.385	2.546	2.343	2.264	1.634	2.931	0.365	80	538	100	1635	1553	1.254	1152	483	1115	438	106791
19	9	14	Hs~Ref:NM_024038.2~uORF:IOH5926~RFU:60898.44	HA20457~B19R14C09	13350	23310	110	1371	1362	541	39	83	83	386	508	131	92	56	0	2024	2015	792	39	237	237	580	931	160	96	28	0	0.721	0.719	0.777	0.682	1.566	0.819	0.539	80	542	100	3075	3057	-0.472	1288	1787	1279	1778	108972
17	14	5	Hs~Ref:NM_032140.1~uORF:IOH6250~RFU:36327.51	HA20457~B17R05C14	5310	21570	110	1370	1385	525	37	49	49	71	78	109	100	100	0	1259	1317	189	14	99	99	116	43	37	100	100	0	1.139	1.097	1.025	1.022	1.541	1.165	0.646	80	567	100	2481	2554	0.188	1321	1160	1336	1218	110810
12	13	19	Hs~Ref:NM_004671.2~uORF:IOH52471~RFU:2596.07	HA20457~B12R19C13	18630	15310	110	1369	1590	622	39	49	49	88	110	125	100	100	0	553	566	112	19	93	93	116	57	49	100	100	0	2.870	3.258	3.124	3.066	1.543	3.963	0.689	80	558	100	1780	2014	1.521	1320	460	1541	473	127221
4	18	12	Hs~MGC:NM_152653.1~uORF:IOH13176~RFU:28639.74	HA20457~B04R12C18	19590	4920	110	1369	1387	613	44	97	97	359	430	119	91	75	0	1046	1020	108	10	298	298	417	257	61	100	95	0	1.701	1.787	1.671	1.544	1.695	2.360	0.630	80	531	100	2020	2012	0.766	1272	748	1290	722	110943
15	17	20	Hs~MGC:BC053859.1~uORF:IOH29027~RFU:2425.6	HA20457~B15R20C17	14980	20000	110	1368	1401	487	34	49	49	54	27	50	100	100	0	462	456	117	25	119	119	132	57	43	100	97	0	3.845	4.012	4.071	3.995	1.505	4.289	0.796	80	578	100	1662	1689	1.943	1319	343	1352	337	112057
42	1	1	AlexaAntiMouseAb~N/A	HA20457~B42R01C01	7370	47740	110	1367	1800	1469	81	47	47	79	98	124	87	83	0	9297	7254	4223	58	167	167	235	155	65	100	98	0	0.145	0.247	0.218	0.131	4.520	0.267	0.857	80	610	100	10450	8840	-2.790	1320	9130	1753	7087	143991
25	22	22	AlexaAntiMouseAb~N/A	HA20457~B25R22C22	6990	33970	110	1367	1445	1181	81	47	47	72	143	198	73	73	0	6817	5121	2760	53	124	124	232	378	162	93	78	0	0.197	0.280	0.209	0.111	5.244	0.304	0.833	80	624	100	8013	6395	-2.342	1320	6693	1398	4997	115627
4	21	22	AlexaAntiMouseAb~N/A	HA20457~B04R22C21	20200	6900	110	1366	1429	399	27	50	50	197	369	187	100	96	0	6767	6547	784	11	248	248	274	136	49	100	100	0	0.202	0.219	0.210	0.212	1.291	0.191	0.736	80	598	100	7835	7678	-2.308	1316	6519	1379	6299	114329
16	4	14	Hs~MGC:BC004236.2~uORF:IOH3887~RFU:8363.54	HA20457~B16R14C04	16870	18820	110	1365	1442	431	29	51	51	226	325	143	98	96	0	2747	2730	165	6	101	101	343	426	124	100	100	0	0.497	0.529	0.523	0.502	1.399	0.539	0.687	80	590	100	3960	4020	-1.010	1314	2646	1391	2629	115385
8	3	16	Hs~Ref:NM_002314.2~CAT:PV4337~RFU:240.17	HA20457~B08R16C03	16580	10180	110	1365	1408	558	39	47	47	52	35	67	100	100	0	807	803	68	8	94	94	100	22	22	100	100	0	1.849	1.920	1.841	1.781	1.469	2.512	0.694	80	577	100	2031	2070	0.886	1318	713	1361	709	112668
27	22	8	Hs~Ref:NM_007080.1~uORF:IOH10074~RFU:31329.06	HA20457~B27R08C22	16030	31110	110	1363	1331	345	25	48	48	53	30	56	100	100	0	561	538	70	13	95	95	101	22	21	100	100	0	2.822	2.896	2.959	2.798	1.444	3.216	0.833	80	580	100	1781	1726	1.497	1315	466	1283	443	106517
17	14	8	Hs~Ref:NM_032567.1~uORF:IOH21814~RFU:7973.8	HA20457~B17R08C14	5310	22160	110	1363	1292	558	43	47	47	48	19	39	100	100	0	826	801	147	18	98	98	101	10	9	100	100	0	1.808	1.771	1.813	1.607	1.618	2.084	0.818	80	567	100	2044	1948	0.854	1316	728	1245	703	103352
34	7	13	Hs~Ref:NM_022749.4~uORF:IOH42659~RFU:5111.61	HA20457~B34R13C07	8530	41160	110	1362	1484	672	45	47	47	50	16	32	100	100	0	430	419	57	13	125	125	126	12	9	100	100	0	4.311	4.888	4.486	4.494	1.493	5.891	0.773	80	535	100	1620	1731	2.108	1315	305	1437	294	118714
23	14	8	Hs~MGC:BC014394.1~uORF:IOH22936~RFU:43947.6	HA20457~B23R08C14	14350	26620	110	1359	1499	647	43	49	49	66	93	140	100	100	0	972	971	48	4	111	111	125	45	36	100	100	0	1.521	1.686	1.576	1.535	1.565	2.136	0.699	80	548	100	2171	2310	0.605	1310	861	1450	860	119927
45	16	8	Hs~Ref:NM_002515.2~uORF:IOH45733~RFU:13078.5	HA20457~B45R08C16	5880	53640	110	1359	1388	720	51	50	50	84	77	91	100	97	0	1221	1182	189	15	194	194	201	33	16	100	100	0	1.275	1.354	1.403	1.161	1.787	1.658	0.692	80	566	100	2336	2326	0.350	1309	1027	1338	988	111040
9	10	6	Hs~Ref:NM_018135.2~uORF:IOH12060~RFU:7473.8	HA20457~B09R06C10	4510	12740	110	1359	1284	392	30	48	48	58	51	87	98	98	0	1213	1183	223	18	99	99	109	48	44	100	100	0	1.177	1.140	1.112	1.072	1.558	1.245	0.827	80	564	100	2425	2320	0.235	1311	1114	1236	1084	102737
21	8	5	Hs~Ref:NM_016940.1~uORF:IOH12821~RFU:44175.76	HA20457~B21R05C08	4170	26050	110	1358	1348	439	32	48	48	84	153	182	100	100	0	1070	1106	123	11	118	118	147	109	74	100	100	0	1.376	1.316	1.399	1.246	1.550	1.479	0.646	80	565	100	2262	2288	0.461	1310	952	1300	988	107860
7	19	7	Hs~Ref:NM_032476.1~uORF:IOH13845~RFU:31617.9	HA20457~B07R07C19	15320	8410	110	1357	1417	505	35	47	47	107	173	161	100	100	0	1024	1021	107	10	111	111	144	99	68	100	100	0	1.435	1.505	1.333	1.414	1.518	1.826	0.675	80	572	100	2223	2280	0.521	1310	913	1370	910	113354
27	19	19	Hs~MGC:BC050563.1~uORF:IOH26951~RFU:29510.92	HA20457~B27R19C19	15420	33320	110	1353	1341	607	45	47	47	49	11	22	100	100	0	742	745	39	5	119	119	120	11	9	100	100	0	2.096	2.067	2.015	1.840	1.649	2.551	0.737	80	558	100	1929	1920	1.068	1306	623	1294	626	107319
42	2	1	AlexaAntiMouseAb~N/A	HA20457~B42R01C02	7560	47740	110	1352	1456	1182	81	47	47	57	59	103	81	78	0	9732	7319	4416	60	165	165	217	127	58	100	98	0	0.136	0.197	0.196	0.118	4.020	0.204	0.810	80	581	100	10872	8563	-2.874	1305	9567	1409	7154	116482
40	15	17	Hs~MGC:BC009108.1~uORF:IOH10191~RFU:37952.01	HA20457~B40R17C15	19200	46420	110	1351	1423	596	41	46	46	50	47	94	100	100	0	1615	1592	157	9	110	110	120	112	93	100	100	0	0.867	0.929	0.818	0.856	1.594	1.020	0.675	80	593	100	2810	2859	-0.206	1305	1505	1377	1482	113878
15	1	12	Hs~MGC:BC033230.1~uORF:IOH23262~RFU:34313.32	HA20457~B15R12C01	11770	18400	110	1351	1182	372	31	49	49	139	188	135	100	98	0	797	820	107	13	299	299	308	157	50	100	100	0	2.614	2.175	2.159	2.090	1.440	2.145	0.604	80	588	100	1800	1654	1.387	1302	498	1133	521	94572
31	5	4	Hs~Ref:NM_022839.2~uORF:IOH1783~RFU:22366.07	HA20457~B31R04C05	12590	34840	110	1350	1553	615	39	47	47	49	36	73	100	100	0	1139	1150	71	6	102	102	104	14	13	100	100	0	1.257	1.437	1.277	1.339	1.455	1.646	0.701	80	575	100	2340	2554	0.329	1303	1037	1506	1048	124247
11	14	19	Hs~Ref:NM_001545.1~uORF:IOH11951~RFU:24406.11	HA20457~B11R19C14	14300	15270	110	1350	1452	625	43	47	47	56	71	126	100	100	0	1206	1196	75	6	95	95	99	20	20	100	100	0	1.173	1.276	1.276	1.149	1.609	1.416	0.695	80	548	100	2414	2506	0.230	1303	1111	1405	1101	116131
35	11	18	Hs~Ref:NM_004465.1~uORF:IOH40262~RFU:4689.96	HA20457~B35R18C11	13850	42100	110	1350	1419	495	34	48	48	61	58	95	100	100	0	1347	1327	121	9	122	122	130	45	34	100	100	0	1.063	1.138	1.150	1.035	1.654	1.311	0.753	80	593	100	2527	2576	0.088	1302	1225	1371	1205	113484
30	4	4	Hs~Ref:NM_014061.3~uORF:IOH10824~RFU:31829.43	HA20457~B30R04C04	7870	34890	110	1348	1380	664	48	55	55	204	294	144	97	86	0	1738	1590	393	24	206	206	277	307	110	93	91	0	0.844	0.957	0.976	0.912	1.736	0.968	0.585	80	558	100	2825	2709	-0.245	1293	1532	1325	1384	110386
1	12	6	Hs~Ref:NM_001280.1~uORF:IOH2905~RFU:19727.49	HA20457~B01R06C12	4850	3770	110	1348	1275	556	43	48	48	62	50	80	100	100	0	1900	1833	299	16	106	106	122	37	30	100	100	0	0.725	0.710	0.756	0.618	1.811	0.745	0.777	80	544	100	3094	2954	-0.465	1300	1794	1227	1727	101994
9	15	18	Hs~Ref:NM_003862.1~uORF:IOH6319~RFU:10468.75	HA20457~B09R18C15	5530	15130	110	1347	1423	559	39	47	47	51	21	41	100	100	0	1052	1017	185	18	93	93	98	24	24	100	100	0	1.356	1.489	1.464	1.373	1.688	1.710	0.725	80	558	100	2259	2300	0.439	1300	959	1376	924	113875
13	15	19	Hs~Ref:XM_374177.2~uORF:IOH43615~RFU:43234.75	HA20457~B13R19C15	5550	19850	110	1347	1415	532	37	49	49	73	79	108	100	100	0	1303	1320	105	7	105	105	148	73	49	100	100	0	1.083	1.124	1.103	1.039	1.474	1.248	0.728	80	569	100	2496	2581	0.116	1298	1198	1366	1215	113194
20	2	5	Hs~Ref:NM_080911.1~uORF:IOH43486~RFU:60691.03	HA20457~B20R05C02	16440	21490	110	1346	1431	383	26	126	126	303	350	115	100	97	0	1667	1695	111	6	201	201	290	225	77	100	100	0	0.832	0.873	0.840	0.842	1.333	0.913	0.614	80	577	100	2686	2799	-0.265	1220	1466	1305	1494	114446
40	19	8	Hs~MGC:BC006986.1~uORF:IOH7170~RFU:6061.14	HA20457~B40R08C19	19990	44600	110	1345	1465	560	38	47	47	50	43	86	100	100	0	1469	1408	200	14	111	111	115	44	38	100	100	0	0.956	1.093	1.021	1.006	1.509	1.205	0.805	80	558	100	2656	2715	-0.065	1298	1358	1418	1297	117192
31	4	13	Hs~MGC:BC016609.1~uORF:IOH11216~RFU:35158.11	HA20457~B31R13C04	12400	36630	110	1344	1471	483	32	46	46	50	39	78	100	100	0	490	491	32	6	103	103	104	8	7	100	100	0	3.354	3.673	3.382	3.483	1.419	4.427	0.796	80	558	100	1685	1813	1.746	1298	387	1425	388	117671
29	20	5	Hs~MGC:BC001697.1~uORF:IOH3864~RFU:5176.86	HA20457~B29R05C20	6650	35020	110	1344	1352	556	41	47	47	51	38	74	100	100	0	976	961	109	11	112	112	113	10	8	100	100	0	1.501	1.537	1.640	1.400	1.562	1.824	0.766	80	567	100	2161	2154	0.586	1297	864	1305	849	108124
26	6	10	Hs~MGC:BC052813.1~uORF:IOH29045~RFU:19655.88	HA20457~B26R10C06	8310	31570	110	1343	1426	638	44	48	48	53	52	98	100	100	0	1406	1398	83	5	191	191	200	42	21	100	100	0	1.066	1.142	1.106	1.030	1.613	1.425	0.648	80	590	100	2510	2585	0.092	1295	1215	1378	1207	114058
8	20	6	Hs~MGC:BC040020.2~uORF:IOH26263~RFU:31765.28	HA20457~B08R06C20	19980	8160	110	1342	1459	490	33	49	49	218	294	134	100	100	0	2076	2156	351	16	203	203	365	298	81	100	100	0	0.690	0.722	0.714	0.688	1.464	0.747	0.638	80	557	100	3166	3363	-0.535	1293	1873	1410	1953	116682
25	4	16	Hs~MGC:NM_015191.1~CAT:PV4792~RFU:1659.39	HA20457~B25R16C04	3400	32760	110	1340	1476	697	47	47	47	47	6	12	100	100	0	437	428	64	14	117	117	122	17	13	100	100	0	4.041	4.595	4.593	4.126	1.683	5.699	0.746	80	567	100	1613	1740	2.015	1293	320	1429	311	118081
26	6	7	Hs~Ref:NM_022551.2~uORF:IOH41520~RFU:7114.96	HA20457~B26R07C06	8310	30970	110	1340	1330	507	38	48	48	51	26	50	100	100	0	1250	1227	148	12	152	152	149	35	23	100	100	0	1.177	1.193	1.263	1.102	1.498	1.319	0.808	80	558	100	2390	2357	0.235	1292	1098	1282	1075	106386
16	11	18	Hs~Ref:NM_012153.1~uORF:IOH26169~RFU:7965.07	HA20457~B16R18C11	18290	19620	110	1340	1287	525	40	47	47	50	24	48	100	100	0	603	606	63	10	82	82	83	12	14	100	100	0	2.482	2.366	2.302	2.142	1.577	2.977	0.745	80	567	100	1814	1764	1.311	1293	521	1240	524	102935
43	18	4	Hs~MGC:BC009289.2~uORF:IOH12925~RFU:20492.93	HA20457~B43R04C18	15280	48300	110	1340	1235	802	64	48	48	1411	7320	518	0	0	0	243	245	18	7	120	120	132	41	31	100	100	0	10.504	9.496	10.045	6.825	2.689	27.707	0.220	80	577	100	1415	1312	3.393	1292	123	1187	125	98835
11	21	2	Hs~Ref:NM_175907.3~uORF:IOH21771~RFU:60906.81	HA20457~B11R02C21	15680	11880	110	1339	1364	451	33	49	49	82	92	112	100	100	0	2164	2279	417	18	209	209	240	130	54	100	100	0	0.660	0.635	0.630	0.607	1.425	0.611	0.744	80	566	100	3245	3385	-0.600	1290	1955	1315	2070	109126
46	3	16	Hs~Ref:NM_000619.2~CAT_PHC4031~RFU:67.69	HA20457~B46R16C03	7830	55270	110	1338	1364	491	35	49	49	373	537	143	98	70	0	606	632	99	15	204	204	294	160	54	100	91	0	3.206	3.072	2.961	2.939	1.586	4.464	0.623	80	577	100	1691	1743	1.681	1289	402	1315	428	109127
48	10	16	Hs~Ref:NM_001008234.1~uORF:IOH58628~RFU:13787.12	HA20457~B48R16C10	18310	55230	110	1337	1447	672	46	47	47	56	60	107	100	100	0	1827	1724	269	15	154	154	162	31	19	100	100	0	0.771	0.892	0.854	0.802	1.593	1.016	0.702	80	585	100	2963	2970	-0.375	1290	1673	1400	1570	115771
13	4	12	Hs~Ref:NM_004111.4~uORF:IOH3530~RFU:28774.18	HA20457~B13R12C04	3340	18470	110	1337	1238	380	30	49	49	82	95	115	100	98	0	823	843	101	11	129	129	197	110	55	100	100	0	1.856	1.665	1.696	1.565	1.551	2.023	0.614	80	566	100	1982	1903	0.892	1288	694	1189	714	99069
29	12	7	Hs~Ref:NM_002110.1~uORF:IOH21123~RFU:5811.14	HA20457~B29R07C12	5050	35430	110	1336	1285	392	30	47	47	50	30	60	100	100	0	312	322	78	24	111	111	114	27	23	100	100	0	6.413	5.867	6.274	5.809	1.412	6.385	0.787	80	558	100	1490	1449	2.681	1289	201	1238	211	102814
20	3	5	Hs~Ref:NM_205848.1~uORF:IOH43389~RFU:21335.15	HA20457~B20R05C03	16640	21480	110	1334	1342	435	32	51	51	128	184	143	98	93	0	803	791	70	8	110	110	157	105	66	100	100	0	1.851	1.896	1.946	1.743	1.629	2.143	0.783	80	567	100	1976	1972	0.889	1283	693	1291	681	107335
32	21	5	Hs~Ref:NM_003089.4~uORF:IOH40192~RFU:6639.74	HA20457~B32R05C21	20340	35000	110	1334	1318	520	39	62	62	118	128	108	100	98	0	2007	1985	202	10	212	212	199	89	44	100	100	0	0.709	0.708	0.722	0.647	1.569	0.719	0.664	80	585	100	3067	3029	-0.497	1272	1795	1256	1773	105410
32	14	15	Hs~Ref:NM_000245.2~CAT:PV3968~RFU:246.47	HA20457~B32R15C14	18940	36990	110	1332	1487	922	62	48	48	55	44	80	90	88	0	196	194	23	11	86	86	97	31	31	96	96	0	11.673	13.324	11.452	7.801	4.412	20.450	0.471	80	597	100	1394	1547	3.545	1284	110	1439	108	118944
39	21	12	Hs~Ref:NM_198216.1~uORF:IOH44674~RFU:38361.24	HA20457~B39R12C21	15870	45440	110	1332	1389	562	40	238	238	389	425	109	87	72	0	929	929	61	6	272	272	255	94	36	100	100	0	1.665	1.752	1.654	1.519	1.761	2.766	0.377	80	587	100	1751	1808	0.736	1094	657	1151	657	111158
43	20	16	Hs~Ref:NM_003769.2~uORF:IOH41184~RFU:7065.66	HA20457~B43R16C20	15710	50690	110	1332	1354	402	29	48	48	84	92	109	100	100	0	2238	2305	206	8	133	133	195	125	64	100	100	0	0.610	0.601	0.595	0.570	1.445	0.556	0.734	80	556	100	3389	3478	-0.713	1284	2105	1306	2172	108324
48	17	12	Hs~MGC:BC014264.2~uORF:IOH14605~RFU:18992.75	HA20457~B48R12C17	19700	54420	110	1330	1654	1516	91	50	50	92	105	114	100	100	0	788	1111	1283	115	211	211	214	30	14	100	100	0	2.218	1.782	1.973	1.907	1.733	1.795	0.489	80	568	100	1857	2504	1.150	1280	577	1604	900	132312
14	9	3	Hs~Ref:NM_198467.1~uORF:IOH40427~RFU:3777.29	HA20457~B14R03C09	8780	16630	110	1330	1249	502	40	49	49	53	18	33	100	100	0	605	581	169	29	141	141	140	36	25	97	95	0	2.761	2.727	2.669	2.840	1.822	2.945	0.768	80	558	100	1745	1640	1.465	1281	464	1200	440	99914
22	16	2	Hs~MGC:BC013116.1~uORF:IOH28618~RFU:15434.5	HA20457~B22R02C16	10230	25420	110	1329	1473	654	44	50	50	63	60	95	100	100	0	1558	1512	164	10	92	92	127	88	69	100	100	0	0.872	1.002	0.925	0.915	1.553	1.264	0.715	80	567	100	2745	2843	-0.197	1279	1466	1423	1420	117874
13	22	3	Hs~Ref:NM_012420.1~uORF:IOH22625~RFU:30883.56	HA20457~B13R03C22	6930	16660	110	1328	1451	688	47	48	48	61	46	75	100	100	0	542	547	41	7	142	142	142	57	40	100	100	0	3.200	3.464	3.110	3.052	1.631	4.560	0.700	80	598	100	1680	1808	1.678	1280	400	1403	405	116084
7	2	5	Hs~MGC:BC014299.2~uORF:IOH12128~RFU:12338.43	HA20457~B07R05C02	11900	8030	110	1328	1355	403	29	47	47	50	24	48	100	100	0	977	975	59	6	98	98	102	17	16	100	100	0	1.457	1.491	1.468	1.416	1.452	1.647	0.771	80	548	100	2160	2185	0.543	1281	879	1308	877	108398
3	7	4	Hs~MGC:BC011924.1~uORF:IOH12682~RFU:20586.87	HA20457~B03R04C07	12830	3330	110	1328	1240	367	29	49	49	87	117	134	100	100	0	1838	1861	138	7	139	139	157	57	36	100	100	0	0.753	0.692	0.719	0.657	1.441	0.694	0.715	80	577	100	2978	2913	-0.410	1279	1699	1191	1722	99213
10	4	4	Hs~Ref:NM_003278.1~uORF:IOH14450~RFU:24224.33	HA20457~B10R04C04	7770	12330	110	1327	1432	412	28	49	49	66	69	104	100	100	0	1029	1014	76	7	114	114	132	40	30	100	100	0	1.397	1.537	1.405	1.476	1.315	1.693	0.797	80	536	100	2193	2283	0.482	1278	915	1383	900	114583
21	10	12	Hs~MGC:BC013171.1~uORF:IOH22121~RFU:36742.36	HA20457~B21R12C10	4580	27450	110	1326	1298	450	34	48	48	81	117	144	100	100	0	786	792	71	8	132	132	174	107	61	100	100	0	1.954	1.894	1.988	1.759	1.585	2.315	0.651	80	559	100	1932	1910	0.967	1278	654	1250	660	103820
41	19	16	Hs~Ref:XM_294794.1~uORF:IOH42923~RFU:12525.11	HA20457~B41R16C19	6550	50780	110	1325	1281	394	30	46	46	50	23	46	100	100	0	1245	1200	186	15	158	158	163	24	14	100	100	0	1.177	1.185	1.227	1.145	1.484	1.237	0.798	80	568	100	2366	2277	0.235	1279	1087	1235	1042	102510
7	4	13	Hs~Ref:NM_006912.3~uORF:IOH29584~RFU:25200.87	HA20457~B07R13C04	12310	9630	110	1322	1444	619	42	49	49	95	122	128	100	96	0	2183	2155	139	6	155	155	161	72	44	100	100	0	0.628	0.697	0.684	0.606	1.867	0.692	0.690	80	544	100	3301	3395	-0.672	1273	2028	1395	2000	115545
24	4	17	Hs~MGC:BC093990.1~uORF:IOH62017~RFU:39636.35	HA20457~B24R17C04	16880	28390	110	1322	1220	593	48	48	48	169	330	195	87	80	0	1717	1636	369	22	93	93	231	342	148	100	98	0	0.784	0.760	0.749	0.567	2.754	0.929	0.719	80	571	100	2898	2715	-0.350	1274	1624	1172	1543	97590
32	22	5	Hs~Ref:NM_003089.4~uORF:IOH40192~RFU:8219.43	HA20457~B32R05C22	20540	35000	110	1321	1287	493	38	48	48	75	85	113	100	100	0	2074	1986	296	14	91	91	130	79	60	100	100	0	0.642	0.654	0.647	0.616	1.696	0.678	0.642	80	608	100	3256	3134	-0.639	1273	1983	1239	1895	102966
32	4	15	Hs~MGC:BC007888.1~uORF:IOH29315~RFU:7949.22	HA20457~B32R15C04	16940	37010	110	1320	1267	575	45	46	46	49	16	32	100	100	0	843	818	75	9	107	107	112	26	23	100	100	0	1.731	1.717	1.765	1.461	1.994	2.220	0.704	80	585	100	2010	1932	0.792	1274	736	1221	711	101363
26	22	17	Hs~Ref:NM_001008723.1~uORF:IOH43999~RFU:5323.14	HA20457~B26R17C22	11520	32960	110	1319	1361	584	42	47	47	47	3	6	100	100	0	384	381	71	18	99	99	99	7	7	100	100	0	4.463	4.660	4.562	4.238	1.779	5.980	0.703	80	588	100	1557	1596	2.158	1272	285	1314	282	108871
22	18	8	Hs~Ref:NM_144664.3~uORF:IOH45592~RFU:23013.1	HA20457~B22R08C18	10630	26620	110	1319	1316	466	35	49	49	53	34	64	100	100	0	1514	1521	78	5	92	92	99	26	26	100	100	0	0.893	0.887	0.877	0.825	1.491	0.918	0.769	80	554	100	2692	2696	-0.163	1270	1422	1267	1429	105261
45	9	3	Hs~Ref:NM_000999.2~uORF:IOH4263~RFU:17220.52	HA20457~B45R03C09	4480	52650	110	1319	1292	423	32	47	47	56	48	85	100	100	0	1076	1055	107	10	219	219	229	52	22	100	100	0	1.484	1.489	1.561	1.405	1.517	1.738	0.768	80	576	100	2129	2081	0.570	1272	857	1245	836	103361
18	11	4	Hs~Ref:NM_016304.2~uORF:IOH7552~RFU:19341.7	HA20457~B18R04C11	9230	21320	110	1318	1542	593	38	53	53	113	149	131	100	100	0	2305	2262	211	9	159	159	165	51	30	100	100	0	0.589	0.708	0.626	0.663	1.444	0.787	0.677	80	574	100	3411	3592	-0.763	1265	2146	1489	2103	123383
8	22	14	Hs~Ref:NM_001008710.1~uORF:IOH59674~RFU:21882.1	HA20457~B08R14C22	20390	9770	110	1318	1465	592	40	47	47	52	54	103	100	100	0	585	587	57	9	173	173	176	25	14	100	100	0	3.085	3.425	3.109	3.202	1.456	4.261	0.736	80	590	100	1683	1832	1.625	1271	412	1418	414	117193
8	11	20	Hs~Ref:NM_001039724.1~uORF:IOH63165~RFU:24193.23	HA20457~B08R20C11	18190	10970	110	1318	1462	635	43	48	48	65	61	93	100	100	0	992	986	57	5	105	105	124	85	68	100	100	0	1.432	1.605	1.398	1.469	1.527	1.917	0.726	80	580	100	2157	2295	0.518	1270	887	1414	881	116944
37	17	16	Hs~MGC:BC053901.1~uORF:IOH29032~RFU:10598.03	HA20457~B37R16C17	6080	46290	110	1318	1402	561	40	47	47	53	31	58	100	100	0	1494	1484	135	9	138	138	141	26	18	100	100	0	0.937	1.007	1.000	0.919	1.557	1.154	0.705	80	577	100	2627	2701	-0.093	1271	1356	1355	1346	112196
30	15	2	Hs~MGC:NM_174942.1~uORF:IOH26291~RFU:11972.71	HA20457~B30R02C15	10090	34470	110	1317	1309	427	32	48	48	49	4	8	100	100	0	1688	2916	4432	151	111	111	114	14	12	100	100	0	0.805	0.450	0.806	0.596	2.329	0.115	0.184	80	593	100	2846	4066	-0.313	1269	1577	1261	2805	104744
24	19	20	Hs~Ref:NM_172238.1~uORF:IOH34861~RFU:18913.76	HA20457~B24R20C19	19900	29020	110	1316	1517	618	40	106	106	196	196	100	100	98	0	1850	1786	269	15	228	228	202	85	42	100	100	0	0.746	0.906	0.790	0.847	1.610	0.898	0.611	80	557	100	2832	2969	-0.423	1210	1622	1411	1558	121334
12	14	18	Hs~MGC:BC032662.1~uORF:IOH21986~RFU:29650.66	HA20457~B12R18C14	18830	15110	110	1316	1269	405	31	50	50	108	157	145	100	98	0	824	821	64	7	110	110	132	58	43	100	100	0	1.773	1.714	1.668	1.604	1.482	1.987	0.705	80	575	100	1980	1930	0.826	1266	714	1219	711	101552
16	12	2	Hs~Ref:NM_013293.1~uORF:IOH9999~RFU:7063.32	HA20457~B16R02C12	18440	16420	110	1315	1473	657	44	52	52	212	312	147	95	93	0	2617	2435	552	22	117	117	208	171	82	100	98	0	0.505	0.613	0.551	0.554	1.692	0.617	0.592	80	574	100	3763	3739	-0.985	1263	2500	1421	2318	117803
29	1	18	Hs~MGC:BC016582.1~uORF:IOH9793~RFU:11789.3	HA20457~B29R18C01	2870	37650	110	1315	1368	506	36	47	47	58	47	81	100	100	0	623	607	57	9	136	136	141	23	16	100	100	0	2.604	2.805	2.624	2.606	1.447	3.325	0.808	80	598	100	1755	1792	1.381	1268	487	1321	471	109455
23	1	17	Hs~MGC:BC014144.1~uORF:IOH12115~RFU:4552.4	HA20457~B23R17C01	11760	28440	110	1315	1360	520	38	47	47	50	21	42	100	100	0	488	473	51	10	96	96	96	8	8	100	100	0	3.235	3.483	3.345	3.295	1.442	4.104	0.777	80	589	100	1660	1690	1.694	1268	392	1313	377	108803
33	17	13	Hs~Ref:NM_199131.1~uORF:IOH35218~RFU:10060.04	HA20457~B33R13C17	6040	41130	110	1315	1242	430	34	47	47	49	16	32	100	100	0	1504	1464	240	16	130	130	587	4377	745	0	0	0	0.923	0.896	0.923	0.834	1.582	0.932	0.814	80	574	100	2642	2529	-0.116	1268	1374	1195	1334	99363
8	22	6	Hs~MGC:BC014924.1~uORF:IOH25747~RFU:28765.28	HA20457~B08R06C22	20370	8170	110	1314	1351	449	33	63	63	184	231	125	100	93	0	1206	1203	106	8	376	376	392	174	44	100	100	0	1.507	1.557	1.434	1.455	1.514	1.869	0.639	80	601	100	2081	2115	0.592	1251	830	1288	827	108049
45	12	12	Hs~MGC:BC010155.2~uORF:IOH12990~RFU:42692.52	HA20457~B45R12C12	5080	54460	110	1313	1394	499	35	199	199	321	343	106	97	83	0	1008	1014	81	7	512	512	530	326	61	97	0	0	2.246	2.380	2.324	2.124	1.808	2.761	0.469	80	561	100	1610	1697	1.167	1114	496	1195	502	111489
34	22	13	Hs~Ref:NM_031445.1~uORF:IOH5185~RFU:22833.89	HA20457~B34R13C22	11500	41120	110	1313	1192	431	36	51	51	222	337	151	97	81	0	1855	1705	359	21	147	147	401	423	105	100	92	0	0.739	0.732	0.755	0.687	1.542	0.874	0.708	80	569	100	2970	2699	-0.437	1262	1708	1141	1558	95328
4	6	13	Hs~MGC:BC094726.1~uORF:IOH62681~RFU:21382.1	HA20457~B04R13C06	17190	5110	110	1312	1456	582	39	48	48	80	102	127	100	100	0	678	735	133	18	136	136	158	61	38	100	100	0	2.332	2.351	2.180	2.205	1.629	2.837	0.653	80	584	100	1806	2007	1.222	1264	542	1408	599	116482
31	13	12	Hs~MGC:BC000712.1~uORF:IOH4703~RFU:41543.9	HA20457~B31R12C13	14210	36420	110	1311	1331	463	34	48	48	61	58	95	100	100	0	979	1007	161	15	145	145	171	119	69	100	100	0	1.514	1.488	1.450	1.396	1.509	1.573	0.704	80	585	100	2097	2145	0.599	1263	834	1283	862	106474
34	5	4	Hs~MGC:NM_153207.2~uORF:IOH14301~RFU:6833.15	HA20457~B34R04C05	8120	39350	110	1310	1376	496	36	47	47	48	4	8	100	100	0	1641	1611	207	12	121	121	124	19	15	100	100	0	0.831	0.892	0.776	0.834	1.509	0.941	0.801	80	576	100	2783	2819	-0.267	1263	1520	1329	1490	110066
11	1	6	Hs~Ref:NM_006924.3~uORF:IOH11039~RFU:4028.38	HA20457~B11R06C01	11680	12700	110	1309	1415	400	28	124	124	256	292	114	100	98	0	2641	2687	148	5	217	217	253	170	67	100	100	0	0.489	0.523	0.487	0.500	1.302	0.527	0.596	80	562	100	3609	3761	-1.033	1185	2424	1291	2470	113202
21	18	6	Hs~Ref:NM_006306.2~uORF:IOH44953~RFU:9537.76	HA20457~B21R06C18	6170	26240	110	1309	1368	512	37	49	49	54	56	103	100	100	0	986	1116	755	67	112	112	113	11	9	100	100	0	1.442	1.314	1.421	1.328	1.818	1.221	0.391	80	556	100	2134	2323	0.528	1260	874	1319	1004	109444
16	15	13	Hs~MGC:BC002424.1~uORF:IOH4157~RFU:18317.52	HA20457~B16R13C15	19090	18610	110	1309	1342	423	31	47	47	48	13	27	100	100	0	738	712	81	11	89	89	90	11	12	100	100	0	1.945	2.079	1.898	1.979	1.450	2.601	0.734	80	564	100	1911	1918	0.959	1262	649	1295	623	107343
16	19	22	ERa~N/A	HA20457~B16R22C19	19900	20410	110	1308	1358	618	45	50	50	91	101	110	100	98	0	1116	1117	93	8	154	154	160	98	61	100	100	0	1.308	1.358	1.309	1.176	1.757	1.603	0.692	80	579	100	2220	2271	0.387	1258	962	1308	963	108608
32	22	22	AlexaAntiMouseAb~N/A	HA20457~B32R22C22	20540	38400	110	1308	1310	767	58	47	47	47	3	6	100	100	0	6328	5668	1723	30	89	89	111	59	53	100	100	0	0.202	0.226	0.229	0.169	2.525	0.230	0.756	80	618	100	7500	6842	-2.307	1261	6239	1263	5579	104771
43	16	2	Hs~MGC:BC021969.2~uORF:IOH13337~RFU:8995.54	HA20457~B43R02C16	14900	47890	110	1307	1337	687	51	46	46	53	58	109	100	98	0	387	384	25	6	115	115	118	17	14	100	100	0	4.636	4.799	4.672	4.041	1.956	6.791	0.606	80	578	100	1533	1560	2.213	1261	272	1291	269	106929
15	20	18	Hs~Ref:NM_015978.1~N/A~RFU:13087.8	HA20457~B15R18C20	15570	19600	110	1305	1345	417	31	47	47	47	3	6	100	100	0	423	424	22	5	83	83	85	18	21	100	100	0	3.700	3.806	3.750	3.581	1.501	4.347	0.758	80	575	100	1598	1639	1.888	1258	340	1298	341	107632
38	17	4	Hs~Ref:NM_017629.2~uORF:IOH38411~RFU:7813.32	HA20457~B38R04C17	10550	43820	110	1305	1332	534	40	46	46	46	2	4	100	100	0	917	900	113	12	259	259	264	39	14	100	100	0	1.913	2.006	1.938	1.838	1.594	2.328	0.751	80	557	100	1917	1927	0.936	1259	658	1286	641	106564
13	7	6	Hs~MGC:BC070073.1~uORF:IOH40070~RFU:5704.06	HA20457~B13R06C07	3940	17280	110	1304	1334	547	41	47	47	48	15	31	100	100	0	1160	1132	188	16	108	108	120	28	23	100	100	0	1.195	1.257	1.157	1.163	1.495	1.505	0.751	80	574	100	2309	2311	0.257	1257	1052	1287	1024	106749
44	15	2	Hs~MGC:BC006794.1~uORF:IOH3178~RFU:2344.68	HA20457~B44R02C15	19230	47860	110	1304	1276	459	35	47	47	70	112	160	100	100	0	716	716	51	7	111	111	130	77	59	100	100	0	2.078	2.031	1.971	1.868	1.550	2.379	0.679	80	576	100	1862	1834	1.055	1257	605	1229	605	102104
1	17	14	Hs~Ref:NM_198483.1~uORF:IOH42754~RFU:17724.89	HA20457~B01R14C17	5860	5360	110	1303	1442	639	44	48	48	52	37	71	100	100	0	1513	1483	164	11	115	115	122	28	22	100	100	0	0.898	1.019	0.976	0.922	1.532	1.174	0.729	80	585	100	2653	2762	-0.156	1255	1398	1394	1368	115324
42	12	17	Hs~Ref:NM_021062.2~uORF:IOH35040~RFU:6611.35	HA20457~B42R17C12	9600	50930	110	1303	1329	536	40	47	47	51	24	47	98	98	0	1476	1451	135	9	168	168	174	26	14	100	100	0	0.960	0.999	0.941	0.873	2.040	1.136	0.756	80	568	100	2564	2565	-0.059	1256	1308	1282	1283	106281
19	17	17	Hs~MGC:BC001280.1~uORF:IOH21165~RFU:30979.35	HA20457~B19R17C17	14990	23910	110	1302	1436	450	31	49	49	76	78	102	100	100	0	834	831	48	5	115	115	155	227	146	100	100	0	1.743	1.937	1.696	1.840	1.437	2.076	0.342	80	602	100	1972	2103	0.801	1253	719	1387	716	114889
36	21	2	Hs~MGC:BC002733.2~uORF:IOH5365~RFU:49117.9	HA20457~B36R02C21	20410	38870	110	1301	1454	515	35	48	48	98	155	158	100	100	0	1915	1922	87	4	92	92	152	138	90	100	100	0	0.687	0.768	0.674	0.723	1.437	0.880	0.730	80	568	100	3076	3236	-0.541	1253	1823	1406	1830	116302
8	21	7	Hs~Ref:NM_004850.2~N/A~RFU:10114.63	HA20457~B08R07C21	20180	8350	110	1301	1341	623	46	53	53	187	239	127	96	88	0	675	852	405	47	300	300	384	268	69	71	32	0	3.328	2.333	2.549	2.555	2.474	2.343	0.300	80	595	100	1623	1840	1.735	1248	375	1288	552	107263
14	21	16	Hs~Ref:NM_001009613.1~uORF:IOH58584~RFU:33262.65	HA20457~B14R16C21	11180	19230	110	1300	1347	470	34	51	51	146	176	120	100	100	0	2173	2142	235	10	124	124	246	246	100	100	100	0	0.610	0.642	0.627	0.602	1.493	0.604	0.676	80	556	100	3298	3314	-0.714	1249	2049	1296	2018	107752
17	20	13	Hs~Ref:NM_005240.1~uORF:IOH13301~RFU:4784.93	HA20457~B17R13C20	6520	23160	110	1300	1290	623	48	48	48	48	19	39	100	100	0	970	942	156	16	103	103	104	9	8	100	100	0	1.444	1.480	1.481	1.305	1.677	1.856	0.745	80	556	100	2119	2081	0.530	1252	867	1242	839	103235
12	16	5	Hs~MGC:BC066316.1~uORF:IOH40103~RFU:5665.92	HA20457~B12R05C16	19210	12500	110	1299	1420	618	43	49	49	117	214	182	97	93	0	753	755	138	18	100	100	143	105	73	100	97	0	1.914	2.093	1.946	1.868	1.802	2.709	0.701	80	538	100	1903	2026	0.937	1250	653	1371	655	113560
41	22	17	Hs~Ref:NM_001008.2~uORF:IOH11799~RFU:6603.71	HA20457~B41R17C22	7120	50960	110	1299	1344	614	45	48	48	209	399	190	91	73	0	1062	936	298	31	152	152	231	169	73	97	92	0	1.375	1.653	1.657	1.594	1.620	2.367	0.679	80	556	100	2161	2080	0.459	1251	910	1296	784	107543
14	6	5	Hs~Ref:NM_133332.1~uORF:IOH38113~RFU:7481.44	HA20457~B14R05C06	8180	17040	110	1298	1315	466	35	47	47	50	34	68	100	100	0	1257	1238	115	9	95	95	97	12	12	100	100	0	1.077	1.109	1.084	1.037	1.469	1.263	0.673	80	546	100	2413	2411	0.106	1251	1162	1268	1143	105197
9	9	6	Hs~Ref:NM_018135.2~uORF:IOH12060~RFU:7352.62	HA20457~B09R06C09	4320	12740	110	1297	1380	492	35	47	47	54	33	61	100	100	0	1187	1185	229	19	97	97	101	18	17	100	100	0	1.147	1.225	1.154	1.145	1.722	1.355	0.682	80	563	100	2340	2421	0.198	1250	1090	1333	1088	110395
3	11	3	Hs~MGC:BC013352.1~uORF:IOH14736~RFU:29278.38	HA20457~B03R03C11	13620	3130	110	1297	1253	356	28	49	49	95	150	157	100	100	0	1264	1245	95	7	118	118	169	99	58	100	100	0	1.089	1.068	1.078	1.013	1.423	1.173	0.751	80	575	100	2394	2331	0.123	1248	1146	1204	1127	100220
38	18	4	Hs~Ref:NM_017629.2~uORF:IOH38411~RFU:7563.32	HA20457~B38R04C18	10740	43830	110	1294	1403	559	39	46	46	46	6	13	100	100	0	913	901	143	15	272	272	270	47	17	100	100	0	1.947	2.157	1.979	2.039	1.575	2.613	0.721	80	573	100	1889	1986	0.961	1248	641	1357	629	112203
20	22	22	AlexaAntiMouseAb~N/A	HA20457~B20R22C22	20460	24880	110	1293	1373	757	55	48	48	48	3	6	98	97	0	5578	5461	621	11	115	115	141	65	46	100	100	0	0.228	0.248	0.231	0.180	3.062	0.253	0.710	80	620	100	6708	6671	-2.134	1245	5463	1325	5346	109856
12	14	19	Hs~Ref:NM_004671.2~uORF:IOH52471~RFU:2490.17	HA20457~B12R19C14	18830	15310	110	1293	1321	531	40	49	49	64	62	96	100	100	0	528	528	56	10	89	89	108	42	38	100	100	0	2.834	2.897	2.841	2.621	1.722	3.931	0.643	80	558	100	1683	1711	1.503	1244	439	1272	439	105648
14	18	9	Hs~MGC:BC002606.1~uORF:IOH4132~RFU:4510.92	HA20457~B14R09C18	10580	17830	110	1293	1316	443	33	47	47	49	22	44	100	100	0	1279	1236	193	15	90	90	92	11	11	100	100	0	1.048	1.107	1.100	1.051	1.501	1.210	0.774	80	558	100	2435	2415	0.068	1246	1189	1269	1146	105250
13	4	21	Hs~MGC:BC023527.2~uORF:IOH29316~RFU:10761.72	HA20457~B13R21C04	3320	20280	110	1293	1234	838	67	135	135	281	327	116	73	61	0	329	340	96	28	294	294	376	277	73	3	0	0	33.086	23.891	23.053	15.489	4.436	13.833	0.055	80	537	100	1193	1145	5.048	1158	35	1099	46	98690
21	21	9	Hs~MGC:BC005840.2~uORF:IOH46093~RFU:26656.11	HA20457~B21R09C21	6790	26850	110	1292	1331	451	33	47	47	51	26	50	100	100	0	1196	1165	142	12	109	109	116	49	42	100	100	0	1.145	1.216	1.152	1.144	1.486	1.317	0.745	80	566	100	2332	2340	0.196	1245	1087	1284	1056	106454
10	20	20	Hs~Ref:NM_203283.1~uORF:IOH44496~RFU:8711.79	HA20457~B10R20C20	10990	15520	110	1291	1395	412	29	49	49	80	80	100	100	100	0	2187	2127	273	12	100	100	123	50	40	100	100	0	0.595	0.664	0.646	0.641	1.397	0.676	0.807	80	557	100	3329	3373	-0.749	1242	2087	1346	2027	111581
24	18	4	Hs~Ref:NM_022074.2~uORF:IOH38055~RFU:4075.52	HA20457~B24R04C18	19670	25780	110	1291	1258	850	67	50	50	119	171	143	78	72	0	606	567	180	31	85	85	143	124	86	92	91	0	2.382	2.506	2.639	1.271	5.357	3.301	0.710	80	554	100	1762	1690	1.252	1241	521	1208	482	100604
26	4	1	ERa~N/A	HA20457~B26R01C04	7900	29750	110	1290	1341	438	32	48	48	54	42	77	100	100	0	1004	1041	172	16	132	132	141	28	19	100	100	0	1.424	1.422	1.452	1.349	1.540	1.560	0.757	80	597	100	2114	2202	0.510	1242	872	1293	909	107252
22	13	19	Hs~MGC:BC066958.1~uORF:IOH61486~RFU:45919.83	HA20457~B22R19C13	9640	28830	110	1290	1282	405	31	48	48	60	71	118	100	100	0	1411	1493	361	24	95	95	112	66	58	100	100	0	0.944	0.883	0.922	0.846	1.590	0.955	0.651	80	576	100	2558	2632	-0.083	1242	1316	1234	1398	102581
25	10	19	Hs~Ref:NM_145899.1~uORF:IOH6516~RFU:9720.52	HA20457~B25R19C10	4600	33370	110	1289	1343	505	37	47	47	48	7	14	100	98	0	1576	1526	181	11	121	121	124	22	17	100	100	0	0.854	0.922	0.911	0.829	1.921	0.977	0.741	80	564	100	2697	2701	-0.228	1242	1455	1296	1405	107474
15	20	16	Hs~Ref:NM_178571.2~uORF:IOH26524~RFU:7767.47	HA20457~B15R16C20	15580	19190	110	1288	1316	408	31	47	47	49	16	32	100	100	0	1540	1532	200	13	87	87	89	17	19	100	100	0	0.854	0.878	0.833	0.840	1.390	0.927	0.791	80	548	100	2694	2714	-0.228	1241	1453	1269	1445	105288
34	6	4	Hs~MGC:NM_153207.2~uORF:IOH14301~RFU:8353.71	HA20457~B34R04C06	8320	39360	110	1288	1274	450	35	47	47	47	3	6	100	100	0	1619	1567	192	12	120	120	126	24	19	100	100	0	0.828	0.848	0.866	0.795	1.528	0.890	0.771	80	563	100	2740	2674	-0.272	1241	1499	1227	1447	101956
42	22	20	Hs~Ref:NM_183237.1~uORF:IOH50165~RFU:7014.19	HA20457~B42R20C22	11610	51510	110	1287	1225	526	42	47	47	51	32	62	100	100	0	803	816	79	9	182	182	190	35	18	100	100	0	1.997	1.858	1.843	1.624	1.744	2.205	0.726	80	598	100	1861	1812	0.998	1240	621	1178	634	97969
20	19	16	Hs~Ref:NM_019846.3~uORF:IOH40714~RFU:3340.61	HA20457~B20R16C19	19860	23680	110	1287	1197	498	41	47	47	49	16	32	100	100	0	741	726	109	15	83	83	85	16	18	100	100	0	1.884	1.788	1.811	1.598	1.733	2.146	0.763	80	574	100	1898	1793	0.914	1240	658	1150	643	95779
37	17	7	Hs~MGC:BC028301.1~uORF:IOH11759~RFU:5568.78	HA20457~B37R07C17	6080	44470	110	1285	1260	369	29	51	51	152	187	123	98	98	0	1467	1404	242	17	159	159	239	136	56	100	100	0	0.943	0.971	0.941	0.932	1.362	1.016	0.841	80	563	100	2542	2454	-0.084	1234	1308	1209	1245	100835
47	22	22	AlexaAntiMouseAb~N/A	HA20457~B47R22C22	16170	56420	110	1284	1255	664	52	49	49	102	113	110	97	95	0	6482	5745	1823	31	222	222	277	135	48	100	100	0	0.197	0.218	0.209	0.181	2.466	0.222	0.766	80	611	100	7495	6729	-2.342	1235	6260	1206	5523	100393
4	20	22	ERa~N/A	HA20457~B04R22C20	20000	6910	110	1283	1310	460	35	55	55	280	446	159	98	78	0	1045	1070	183	17	196	196	255	178	69	100	100	0	1.446	1.436	1.326	1.365	1.419	2.158	0.487	80	614	100	2077	2129	0.532	1228	849	1255	874	104762
45	9	8	Hs~Ref:NM_002677.1~uORF:IOH27101~RFU:23156.62	HA20457~B45R08C09	4490	53640	110	1282	1436	567	39	47	47	64	60	93	100	100	0	1347	1362	110	8	210	210	231	92	39	100	100	0	1.086	1.206	1.082	1.109	1.519	1.338	0.727	80	586	100	2372	2541	0.119	1235	1137	1389	1152	114850
21	21	11	Hs~MGC:BC020803.1~uORF:IOH14817~RFU:35409.23	HA20457~B21R11C21	6780	27240	110	1282	1333	430	32	48	48	55	61	110	100	100	0	1130	1149	83	7	107	107	114	36	31	100	100	0	1.206	1.233	1.215	1.151	1.524	1.349	0.717	80	576	100	2257	2327	0.271	1234	1023	1285	1042	106626
13	5	6	Hs~Ref:NM_016355.3~uORF:IOH39973~RFU:19973.96	HA20457~B13R06C05	3540	17270	110	1282	1327	459	34	47	47	59	80	135	100	100	0	1670	1625	220	13	105	105	119	83	69	100	100	0	0.789	0.842	0.795	0.800	1.436	0.841	0.755	80	593	100	2800	2800	-0.342	1235	1565	1280	1520	106155
19	15	13	Hs~Ref:NM_001564.1~uORF:IOH22913~RFU:13631	HA20457~B19R13C15	14580	23110	110	1282	1308	510	38	50	50	101	129	127	100	100	0	1585	1567	88	5	124	124	142	59	41	100	100	0	0.843	0.872	0.856	0.792	1.583	0.972	0.742	80	556	100	2693	2701	-0.246	1232	1461	1258	1443	104651
1	19	20	Hs~Ref:XM_003960444.1~uORF:IOH50171~RFU:35311.14	HA20457~B01R20C19	6260	6570	110	1281	1339	369	27	48	48	113	175	154	100	100	0	2218	2209	168	7	135	135	255	252	98	100	100	0	0.592	0.622	0.621	0.600	1.346	0.662	0.795	80	567	100	3316	3365	-0.756	1233	2083	1291	2074	107150
11	17	9	Hs~Ref:NM_016505.2~uORF:IOH6093~RFU:16851.53	HA20457~B11R09C17	14890	13280	110	1279	1365	370	27	50	50	87	98	112	100	100	0	1942	1935	88	4	117	117	132	55	41	100	100	0	0.673	0.723	0.689	0.691	1.375	0.677	0.752	80	566	100	3054	3133	-0.570	1229	1825	1315	1818	109228
22	17	20	Hs~Ref:NM_199247.1~uORF:IOH43177~RFU:35699.4	HA20457~B22R20C17	10450	29020	110	1278	1392	451	32	47	47	59	85	144	100	100	0	2263	2311	231	9	95	95	116	100	86	100	100	0	0.568	0.607	0.560	0.577	1.432	0.568	0.716	80	557	100	3399	3561	-0.817	1231	2168	1345	2216	111363
48	17	6	Hs~Ref:NM_025104.2~uORF:IOH59472~RFU:33600.26	HA20457~B48R06C17	19690	53240	110	1278	1316	442	33	62	62	121	124	102	100	98	0	1072	1009	208	20	223	223	228	72	31	97	96	0	1.432	1.595	1.434	1.640	2.025	1.688	0.672	80	558	100	2065	2040	0.518	1216	849	1254	786	105272
23	18	7	Hs~MGC:BC045535.1~uORF:IOH26895~RFU:11925.76	HA20457~B23R07C18	15150	26410	110	1277	1225	413	33	48	48	54	46	85	100	100	0	1059	1031	94	9	96	96	102	18	17	100	100	0	1.276	1.259	1.267	1.164	1.574	1.492	0.755	80	565	100	2192	2112	0.352	1229	963	1177	935	97967
34	6	18	Hs~MGC:NM_173195.2~uORF:IOH29635~RFU:19164.85	HA20457~B34R18C06	8270	42110	110	1275	1279	602	47	496	496	775	899	116	41	10	0	219	260	264	101	171	171	212	288	135	3	2	0	16.229	8.798	16.120	15.572	2.966	20.607	0.079	80	541	100	827	872	4.021	779	48	783	89	102295
36	21	22	AlexaAntiMouseAb~N/A	HA20457~B36R22C21	20370	42860	110	1275	1127	597	52	46	46	47	5	10	93	93	0	6196	5803	1419	24	153	153	212	139	65	100	100	0	0.203	0.191	0.203	0.123	4.127	0.200	0.820	80	572	100	7272	6731	-2.298	1229	6043	1081	5650	90198
27	20	19	Hs~MGC:BC050563.1~uORF:IOH26951~RFU:23226.38	HA20457~B27R19C20	15620	33320	110	1274	1288	449	34	48	48	50	19	38	100	100	0	760	761	52	6	112	112	114	15	13	100	100	0	1.892	1.911	1.907	1.779	1.549	2.359	0.692	80	558	100	1874	1889	0.920	1226	648	1240	649	103024
20	12	4	Hs~MGC:BC013073.1~uORF:IOH10173~RFU:7487.99	HA20457~B20R04C12	18430	21280	110	1274	1283	571	44	58	58	234	359	153	91	85	0	880	840	150	17	122	122	221	203	91	98	97	0	1.604	1.706	1.568	1.520	1.697	1.961	0.752	80	567	100	1974	1943	0.682	1216	758	1225	718	102654
13	1	11	AlexaAntiMouseAb~N/A	HA20457~B13R11C01	2750	18300	110	1274	1237	834	67	48	48	61	90	147	87	85	0	8344	6516	3342	51	138	138	221	332	150	100	88	0	0.149	0.186	0.162	0.147	2.508	0.188	0.736	80	562	100	9432	7567	-2.743	1226	8206	1189	6378	98988
9	22	20	Hs~Ref:ENST00000356268~uORF:IOH50085~RFU:9210.7	HA20457~B09R20C22	6930	15520	110	1273	1474	566	38	48	48	74	118	159	100	100	0	752	752	68	9	95	95	106	43	40	100	100	0	1.865	2.170	1.969	2.038	1.349	2.817	0.701	80	570	100	1882	2083	0.899	1225	657	1426	657	117951
47	12	16	Hs~MGC:BC050434.1~uORF:IOH26685~RFU:21036.03	HA20457~B47R16C12	14180	55210	110	1273	1343	582	43	46	46	92	194	210	97	95	0	1589	1592	150	9	160	160	205	135	65	100	100	0	0.859	0.906	0.938	0.791	1.811	1.058	0.642	80	575	100	2656	2729	-0.220	1227	1429	1297	1432	107462
43	17	2	Hs~Ref:NM_139201.1~uORF:IOH3954~RFU:12091.7	HA20457~B43R02C17	15100	47890	110	1272	1295	646	49	46	46	55	61	110	100	100	0	374	376	24	6	119	119	122	18	14	100	100	0	4.808	4.860	4.424	4.259	1.715	7.213	0.625	80	548	100	1481	1506	2.265	1226	255	1249	257	103561
7	14	15	Hs~Ref:NM_002742.1~CAT:PV3791~RFU:11649.93	HA20457~B07R15C14	14310	10020	110	1272	1244	511	41	46	46	47	9	19	100	100	0	352	355	85	23	93	93	95	13	13	100	100	0	4.734	4.573	4.624	4.224	1.702	5.431	0.681	80	556	100	1485	1460	2.243	1226	259	1198	262	99548
22	20	14	Hs~MGC:BC053840.1~uORF:IOH29362~RFU:16828.5	HA20457~B22R14C20	11040	27820	110	1271	1424	672	47	49	49	167	638	382	82	46	0	314	334	50	14	107	107	451	1390	308	0	0	0	5.903	6.057	6.001	5.398	1.664	1.858	0.003	80	558	100	1429	1602	2.562	1222	207	1375	227	113953
42	4	15	Hs~MGC:BC069092.1~uORF:IOH63641~RFU:33012.01	HA20457~B42R15C04	8000	50550	110	1271	1273	352	27	58	58	176	223	126	100	98	0	769	782	39	4	295	295	287	119	41	100	100	0	2.559	2.495	2.476	2.394	1.358	2.606	0.680	80	542	100	1687	1702	1.356	1213	474	1215	487	101832
1	22	22	AlexaAntiMouseAb~N/A	HA20457~B01R22C22	6870	6960	110	1271	1222	434	35	48	48	51	23	45	100	100	0	6913	6655	825	12	155	155	191	95	49	100	100	0	0.181	0.181	0.189	0.163	1.776	0.173	0.750	80	621	100	7981	7674	-2.466	1223	6758	1174	6500	97765
1	2	20	Hs~Ref:NM_031950.1~uORF:IOH10917~RFU:38419.21	HA20457~B01R20C02	2870	6570	110	1270	1280	365	28	49	49	101	142	140	100	100	0	1136	1135	106	9	147	147	189	104	55	100	100	0	1.235	1.246	1.291	1.196	1.369	1.286	0.690	80	585	100	2210	2219	0.304	1221	989	1231	988	102423
33	22	14	Hs~Ref:NM_134427.1~uORF:IOH45474~RFU:47676.86	HA20457~B33R14C22	7050	41320	110	1270	1265	424	33	92	92	212	234	110	100	96	0	1207	1198	62	5	283	283	388	259	66	100	100	0	1.275	1.282	1.262	1.191	1.525	1.628	0.621	80	590	100	2102	2088	0.350	1178	924	1173	915	101163
4	16	6	Hs~MGC:BC022344.1~uORF:IOH14799~RFU:40198.69	HA20457~B04R06C16	19190	3700	110	1269	1278	458	35	49	49	96	155	161	100	100	0	1002	1045	154	14	179	179	229	114	49	100	100	0	1.482	1.419	1.403	1.330	1.493	1.609	0.693	80	534	100	2043	2095	0.568	1220	823	1229	866	102249
26	7	10	Hs~MGC:BC057774.1~uORF:IOH29168~RFU:22946.51	HA20457~B26R10C07	8510	31570	110	1269	1171	516	44	48	48	52	36	69	96	96	0	1665	1666	86	5	132	132	146	40	27	100	100	0	0.796	0.732	0.810	0.573	3.388	0.799	0.713	80	558	100	2754	2657	-0.328	1221	1533	1123	1534	93678
18	15	8	Hs~Ref:NM_145271.1~uORF:IOH14111~RFU:11508.73	HA20457~B18R08C15	10030	22110	110	1268	1281	576	44	48	48	50	16	32	100	100	0	898	880	108	12	94	94	96	14	14	100	100	0	1.517	1.569	1.547	1.406	1.587	1.923	0.750	80	568	100	2024	2019	0.602	1220	804	1233	786	102491
29	16	2	Hs~Ref:NM_014065.2~uORF:IOH43942~RFU:6294.76	HA20457~B29R02C16	5850	34420	110	1268	1236	433	35	47	47	48	16	33	100	100	0	789	795	64	8	115	115	116	13	11	100	100	0	1.812	1.749	1.665	1.625	1.487	2.021	0.824	80	558	100	1895	1869	0.857	1221	674	1189	680	98874
32	14	9	Hs~Ref:NM_001030002.1~uORF:IOH55430~RFU:39260.92	HA20457~B32R09C14	18920	35810	110	1267	1286	443	34	48	48	100	178	178	100	95	0	1185	1160	102	8	78	78	125	124	99	100	100	0	1.101	1.144	1.141	1.057	1.561	1.318	0.700	80	563	100	2326	2320	0.139	1219	1107	1238	1082	102888
21	22	9	Hs~MGC:BC005840.2~uORF:IOH46093~RFU:28946.24	HA20457~B21R09C22	6980	26840	110	1266	1302	437	33	48	48	56	81	144	100	100	0	1092	1070	71	6	106	106	108	14	12	100	100	0	1.235	1.301	1.317	1.222	1.473	1.520	0.709	80	580	100	2204	2218	0.305	1218	986	1254	964	104188
3	3	5	Hs~Ref:NM_003621.1~uORF:IOH10784~RFU:13768.56	HA20457~B03R05C03	12030	3530	110	1266	1257	428	34	50	50	72	69	95	100	100	0	1177	1181	92	7	155	155	163	79	48	100	100	0	1.190	1.176	1.209	1.093	1.500	1.207	0.717	80	594	100	2238	2233	0.251	1216	1022	1207	1026	100520
48	13	2	Hs~MGC:NM_033082.1~uORF:IOH7469~RFU:40379.46	HA20457~B48R02C13	18870	52410	110	1265	1317	561	42	202	202	392	414	105	91	67	0	1002	992	71	7	435	435	485	301	62	98	28	0	1.875	2.002	1.780	1.651	2.311	2.252	0.548	80	554	100	1630	1672	0.907	1063	567	1115	557	105353
16	5	8	Hs~Ref:NM_003582.1~N/A~RFU:10054.87	HA20457~B16R08C05	17070	17620	110	1264	1348	427	31	47	47	50	22	44	100	100	0	1154	1147	103	8	92	92	96	38	39	100	100	0	1.146	1.233	1.132	1.175	1.464	1.292	0.767	80	565	100	2279	2356	0.197	1217	1062	1301	1055	107877
2	5	9	Hs~MGC:BC069023.1~uORF:IOH40776~RFU:3706.33	HA20457~B02R09C05	7960	4370	110	1264	1243	467	37	48	48	48	2	4	100	100	0	1075	981	276	28	124	124	126	19	15	100	100	0	1.279	1.394	1.392	1.374	2.015	1.500	0.706	80	564	100	2167	2052	0.355	1216	951	1195	857	99463
48	8	12	Hs~MGC:BC038838.1~uORF:IOH28760~RFU:33618.86	HA20457~B48R12C08	17900	54430	110	1263	1307	484	37	49	49	95	146	153	100	100	0	824	808	116	14	196	196	238	109	45	100	100	0	1.933	2.056	2.042	1.941	1.521	2.690	0.659	80	578	100	1842	1870	0.951	1214	628	1258	612	104532
48	2	22	ERa~N/A	HA20457~B48R22C02	16710	56430	110	1262	1342	554	41	48	48	128	167	130	100	100	0	1212	1265	171	13	172	172	240	135	56	100	100	0	1.167	1.184	1.091	1.096	1.490	1.377	0.734	80	588	100	2254	2387	0.223	1214	1040	1294	1093	107321
43	14	8	Hs~MGC:BC009877.1~uORF:IOH12614~RFU:25114.63	HA20457~B43R08C14	14490	49090	110	1262	1182	434	36	47	47	64	65	101	100	100	0	746	738	49	6	143	143	167	55	32	100	100	0	2.015	1.908	2.006	1.748	1.590	2.491	0.676	80	567	100	1818	1730	1.011	1215	603	1135	595	94588
6	17	2	Hs~Ref:NM_021063.2~uORF:IOH58956~RFU:11945.41	HA20457~B06R02C17	10380	7440	110	1260	1195	528	44	48	48	54	42	77	100	100	0	1910	1904	135	7	107	107	116	62	53	100	100	0	0.672	0.638	0.660	0.566	1.648	0.643	0.636	80	548	100	3015	2944	-0.573	1212	1803	1147	1797	95625
4	22	13	Hs~Ref:NM_002432.1~uORF:IOH21730~RFU:2148.47	HA20457~B04R13C22	20390	5090	110	1259	1351	664	49	47	47	48	23	47	96	96	0	874	893	100	11	240	240	245	33	13	100	100	0	1.912	1.997	1.858	1.524	2.823	2.603	0.701	80	612	100	1846	1957	0.935	1212	634	1304	653	108060
43	7	4	Hs~Ref:NM_001956.1~uORF:IOH22678~RFU:5699.78	HA20457~B43R04C07	13090	48300	110	1259	1168	402	34	47	47	55	49	89	100	100	0	1156	1126	124	11	119	119	122	20	16	100	100	0	1.169	1.113	1.138	1.036	1.485	1.237	0.791	80	594	100	2249	2128	0.225	1212	1037	1121	1007	93419
11	8	16	Hs~Ref:NM_016200.2~uORF:IOH5331~RFU:13410.48	HA20457~B11R16C08	13100	14680	110	1258	1246	496	39	48	48	57	40	70	100	100	0	253	251	21	8	95	95	108	32	29	100	100	0	7.658	7.679	7.573	6.974	1.560	10.115	0.628	80	567	100	1368	1354	2.937	1210	158	1198	156	99702
22	16	4	Hs~MGC:BC036123.1~uORF:IOH27289~RFU:41338.36	HA20457~B22R04C16	10220	25810	110	1257	1297	554	42	49	49	57	42	73	100	100	0	1169	1168	48	4	96	96	111	38	34	100	100	0	1.126	1.164	1.100	1.031	1.742	1.347	0.672	80	558	100	2281	2320	0.171	1208	1073	1248	1072	103770
23	8	5	Hs~MGC:BC010929.1~uORF:IOH12868~RFU:15037.12	HA20457~B23R05C08	13150	26020	110	1256	1297	488	37	48	48	53	61	115	100	100	0	1057	1011	95	9	97	97	99	21	21	100	100	0	1.258	1.367	1.392	1.244	1.655	1.647	0.702	80	576	100	2168	2163	0.332	1208	960	1249	914	103753
27	22	11	Hs~MGC:BC009294.1~uORF:IOH14145~RFU:6490.17	HA20457~B27R11C22	16020	31710	110	1254	1231	454	36	48	48	48	10	20	98	98	0	943	919	158	17	102	102	119	52	43	100	100	0	1.434	1.448	1.349	1.280	2.094	1.640	0.795	80	580	100	2047	2000	0.520	1206	841	1183	817	98493
10	19	20	Hs~Ref:NM_203283.1~uORF:IOH44496~RFU:9422.43	HA20457~B10R20C19	10790	15520	110	1253	1284	385	29	49	49	73	74	101	100	100	0	2174	2155	144	6	105	105	130	52	40	100	100	0	0.582	0.602	0.565	0.573	1.379	0.607	0.801	80	567	100	3273	3285	-0.781	1204	2069	1235	2050	102757
45	21	7	Hs~Ref:NM_001616.2~N/A~RFU:18737.91	HA20457~B45R07C21	6890	53430	110	1252	1398	541	38	46	46	49	22	44	100	100	0	511	517	34	6	177	177	179	20	11	100	100	0	3.611	3.976	3.699	3.721	1.469	4.785	0.673	80	565	100	1540	1692	1.852	1206	334	1352	340	111829
17	22	22	AlexaAntiMouseAb~N/A	HA20457~B17R22C22	6920	24960	110	1252	1316	634	48	49	49	49	3	6	100	98	0	5952	5548	1145	20	110	110	144	86	59	100	100	0	0.206	0.233	0.218	0.185	2.441	0.248	0.753	80	602	100	7045	6705	-2.280	1203	5842	1267	5438	105295
10	20	4	Hs~Ref:NM_016607.1~uORF:IOH7393~RFU:22346.07	HA20457~B10R04C20	10970	12320	110	1252	1244	276	22	48	48	54	30	55	100	100	0	984	979	66	6	108	108	110	16	14	100	100	0	1.374	1.373	1.399	1.337	1.315	1.414	0.749	80	567	100	2080	2067	0.459	1204	876	1196	871	99543
42	7	9	Hs~MGC:BC015008.1~uORF:IOH23029~RFU:4875.55	HA20457~B42R09C07	8600	49340	110	1252	1194	569	47	47	47	49	16	32	100	100	0	1087	1057	139	13	175	175	192	40	20	100	100	0	1.321	1.300	1.386	1.105	1.939	1.562	0.697	80	578	100	2117	2029	0.402	1205	912	1147	882	95550
24	17	4	Hs~Ref:NM_022074.2~uORF:IOH38055~RFU:3995.54	HA20457~B24R04C17	19480	25800	110	1250	1394	559	40	49	49	52	20	38	100	100	0	649	613	157	25	83	83	92	22	23	100	100	0	2.122	2.538	2.453	2.450	1.813	3.154	0.678	80	580	100	1767	1875	1.085	1201	566	1345	530	111497
16	22	8	Hs~Ref:NM_032485.4~uORF:IOH36748~RFU:4950.71	HA20457~B16R08C22	20480	17610	110	1249	1246	467	37	47	47	48	21	43	100	100	0	1092	1056	141	13	90	90	91	9	9	100	100	0	1.200	1.241	1.164	1.152	1.491	1.390	0.794	80	590	100	2204	2165	0.263	1202	1002	1199	966	99697
16	21	2	Hs~MGC:BC009350.1~uORF:IOH14087~RFU:3627.23	HA20457~B16R02C21	20260	16410	110	1248	1301	718	55	47	47	48	8	16	100	100	0	875	834	173	20	109	109	140	71	50	100	100	0	1.568	1.730	1.657	1.386	1.963	2.312	0.751	80	556	100	1967	1979	0.649	1201	766	1254	725	104043
2	17	3	Hs~Ref:NM_201403.1~uORF:IOH42184~RFU:52507.64	HA20457~B02R03C17	10360	3200	110	1247	1377	566	41	53	53	325	458	140	100	75	0	1504	1485	154	10	216	216	516	541	104	100	85	0	0.927	1.043	0.961	0.973	1.403	1.183	0.500	80	556	100	2482	2593	-0.109	1194	1288	1324	1269	110156
42	18	3	Hs~Ref:XM_086879.4~uORF:IOH43381~RFU:40612.91	HA20457~B42R03C18	10790	48130	110	1247	1291	406	31	46	46	50	35	70	100	100	0	1092	1086	58	5	177	177	187	77	41	100	100	0	1.313	1.370	1.306	1.303	1.413	1.485	0.759	80	574	100	2116	2154	0.392	1201	915	1245	909	103275
43	7	18	Hs~Ref:NM_014791.1~N/A~RFU:3535.16	HA20457~B43R18C07	13100	51100	110	1247	1196	687	57	46	46	47	16	34	100	100	0	705	714	119	16	134	134	139	24	17	100	100	0	2.103	1.983	1.881	1.577	2.063	2.684	0.673	80	556	100	1772	1730	1.073	1201	571	1150	580	95665
31	2	13	Hs~MGC:BC038713.1~uORF:IOH27724~RFU:12927.83	HA20457~B31R13C02	12000	36630	110	1246	1432	492	34	47	47	55	61	110	100	100	0	451	449	28	6	105	105	106	12	11	100	100	0	3.465	4.026	3.707	3.805	1.398	4.918	0.821	80	566	100	1545	1729	1.793	1199	346	1385	344	114588
23	17	7	Hs~MGC:BC045535.1~uORF:IOH26895~RFU:8381	HA20457~B23R07C17	14960	26410	110	1245	1229	420	34	49	49	53	26	49	100	100	0	1111	1048	190	18	106	106	117	33	28	100	100	0	1.190	1.253	1.347	1.202	1.665	1.500	0.757	80	573	100	2201	2122	0.251	1196	1005	1180	942	98281
41	13	20	Hs~MGC:BC000103.1~uORF:IOH4659~RFU:23812.31	HA20457~B41R20C13	5340	51580	110	1243	1186	445	37	46	46	53	49	92	100	100	0	894	890	65	7	175	175	176	37	21	100	100	0	1.665	1.594	1.712	1.448	1.607	1.857	0.756	80	580	100	1916	1855	0.735	1197	719	1140	715	94909
36	13	12	Hs~MGC:BC016470.2~uORF:IOH11948~RFU:10246.47	HA20457~B36R12C13	18820	40880	110	1242	1235	415	33	46	46	47	3	6	100	100	0	984	999	170	17	99	99	100	9	9	100	100	0	1.351	1.321	1.430	1.250	1.518	1.440	0.752	80	557	100	2081	2089	0.434	1196	885	1189	900	98786
23	17	16	Hs~Ref:NM_000882.1~uORF:IOH29844~RFU:9645.2	HA20457~B23R16C17	14970	28230	110	1240	1331	568	42	47	47	50	18	36	100	100	0	260	251	37	14	129	129	141	36	25	96	92	0	9.107	10.525	10.659	10.068	1.716	13.840	0.543	80	557	100	1324	1406	3.187	1193	131	1284	122	106480
33	7	10	Hs~MGC:BC005043.1~uORF:IOH6656~RFU:23079.69	HA20457~B33R10C07	4050	40540	110	1239	1327	628	47	48	48	57	55	96	100	100	0	1707	1712	130	7	178	178	178	31	17	100	100	0	0.779	0.834	0.772	0.729	1.725	0.887	0.694	80	567	100	2720	2813	-0.360	1191	1529	1279	1534	106175
8	15	19	Hs~Ref:NM_020168.3~uORF:IOH20961~RFU:17272.93	HA20457~B08R19C15	18980	10770	110	1239	1294	394	30	47	47	49	19	38	100	100	0	1226	1194	89	7	98	98	102	37	36	100	100	0	1.057	1.138	1.073	1.086	1.358	1.284	0.764	80	536	100	2320	2343	0.080	1192	1128	1247	1096	103509
11	22	2	Hs~Ref:NM_175907.3~uORF:IOH21771~RFU:60912.39	HA20457~B11R02C22	15880	11880	110	1236	1332	572	42	49	49	83	101	121	100	100	0	2394	2480	429	17	195	195	232	154	66	100	100	0	0.540	0.561	0.520	0.521	1.387	0.573	0.754	80	590	100	3386	3568	-0.890	1187	2199	1283	2285	106571
3	8	5	Hs~Ref:NM_001022.3~uORF:IOH4572~RFU:25055.68	HA20457~B03R05C08	13020	3530	110	1235	1268	675	53	52	52	201	401	199	86	60	0	2516	2474	217	8	154	154	209	146	69	100	100	0	0.501	0.524	0.490	0.430	1.936	0.674	0.486	80	538	100	3545	3536	-0.998	1183	2362	1216	2320	101470
47	10	5	Hs~MGC:BC019598.1~uORF:IOH10613~RFU:3956.33	HA20457~B47R05C10	13760	53010	110	1235	1248	401	32	46	46	46	7	15	100	100	0	908	872	136	15	148	148	150	15	10	100	100	0	1.564	1.660	1.641	1.594	1.402	1.810	0.863	80	558	100	1949	1926	0.646	1189	760	1202	724	99851
21	6	12	Hs~MGC:BC002921.2~uORF:IOH6311~RFU:50386.46	HA20457~B21R12C06	3780	27450	110	1234	1238	414	33	48	48	67	100	149	100	98	0	1402	1436	100	6	116	116	130	75	57	100	100	0	0.922	0.902	0.917	0.837	1.544	0.911	0.659	80	576	100	2472	2510	-0.117	1186	1286	1190	1320	99060
9	18	14	Hs~Ref:NM_016203.2~uORF:IOH42382~RFU:17453.06	HA20457~B09R14C18	6120	14320	110	1234	1222	528	43	47	47	69	183	265	100	92	0	986	962	81	8	93	93	101	48	47	100	100	0	1.329	1.352	1.448	1.191	1.795	1.657	0.702	80	567	100	2080	2044	0.411	1187	893	1175	869	97792
46	21	11	Hs~Ref:NM_002364.1~uORF:IOH11315~RFU:45415.74	HA20457~B46R11C21	11420	54240	110	1233	1324	501	37	52	52	360	444	123	100	76	0	1522	1522	313	20	205	205	362	246	67	100	100	0	0.897	0.966	0.912	0.921	1.466	1.144	0.563	80	574	100	2498	2589	-0.157	1181	1317	1272	1317	105899
48	19	22	ERa~N/A	HA20457~B48R22C19	20120	56420	110	1232	1380	524	37	209	209	248	195	78	97	92	0	964	988	105	10	327	327	312	67	21	100	100	0	1.606	1.772	1.675	1.568	1.829	2.236	0.595	80	599	100	1660	1832	0.683	1023	637	1171	661	110428
2	22	22	AlexaAntiMouseAb~N/A	HA20457~B02R22C22	11360	6960	110	1231	1295	641	49	48	48	58	48	82	100	100	0	6880	6684	828	12	132	132	160	72	45	100	100	0	0.175	0.190	0.167	0.162	1.742	0.190	0.727	80	602	100	7931	7799	-2.512	1183	6748	1247	6552	103566
39	1	14	Hs~MGC:BC012865.1~uORF:IOH11604~RFU:23590.03	HA20457~B39R14C01	11880	45850	110	1230	1249	404	32	48	48	53	39	73	100	100	0	970	961	81	8	160	160	163	22	13	100	100	0	1.459	1.499	1.525	1.416	1.492	1.828	0.658	80	584	100	1992	2002	0.545	1182	810	1201	801	99921
15	6	9	Hs~MGC:BC035601.1~uORF:IOH27560~RFU:6182.31	HA20457~B15R09C06	12760	17790	110	1230	1184	460	38	48	48	51	26	50	100	100	0	1071	1018	207	20	90	90	92	9	9	100	100	0	1.205	1.224	1.263	1.136	1.562	1.367	0.808	80	576	100	2163	2064	0.269	1182	981	1136	928	94727
13	6	6	Hs~Ref:NM_016355.3~uORF:IOH39973~RFU:19946.99	HA20457~B13R06C06	3740	17280	110	1229	1319	639	48	47	47	51	43	84	97	95	0	1736	1737	164	9	106	106	109	15	13	100	100	0	0.725	0.780	0.712	0.632	2.240	0.890	0.659	80	568	100	2812	2903	-0.464	1182	1630	1272	1631	105502
1	4	20	Hs~Ref:NM_016535.1~uORF:IOH4783~RFU:6730.35	HA20457~B01R20C04	3270	6570	110	1229	1255	567	45	46	46	47	3	6	100	100	0	952	1000	420	42	115	115	115	10	8	100	100	0	1.413	1.366	1.409	1.286	1.885	1.469	0.610	80	546	100	2020	2094	0.499	1183	837	1209	885	100404
24	9	14	Hs~Ref:NM_032377.2~uORF:IOH6191~RFU:20280.88	HA20457~B24R14C09	17880	27810	110	1229	1166	311	26	56	56	197	225	114	100	96	0	1964	2031	355	17	275	275	479	429	89	100	100	0	0.694	0.632	0.698	0.614	1.457	0.620	0.582	80	542	100	2862	2866	-0.526	1173	1689	1110	1756	93310
26	20	8	Hs~Ref:NM_025065.4~uORF:IOH13307~RFU:4391.74	HA20457~B26R08C20	11120	31160	110	1228	1143	453	39	47	47	48	7	14	100	100	0	778	731	166	22	97	97	99	15	15	100	100	0	1.734	1.729	1.699	1.628	1.862	2.118	0.661	80	575	100	1862	1730	0.794	1181	681	1096	634	91417
16	21	22	AlexaAntiMouseAb~N/A	HA20457~B16R22C21	20300	20410	110	1227	1229	430	34	49	49	59	74	125	98	98	0	5573	5337	995	18	144	144	167	79	47	100	100	0	0.217	0.227	0.227	0.213	1.824	0.221	0.825	80	598	100	6607	6373	-2.204	1178	5429	1180	5193	98335
48	9	18	Hs~Ref:NM_152595.3~uORF:IOH35990~RFU:17758.56	HA20457~B48R18C09	18110	55640	110	1225	1221	396	32	47	47	49	15	30	100	100	0	1378	1410	259	18	148	148	148	18	12	100	100	0	0.958	0.930	0.974	0.909	1.503	0.937	0.786	80	565	100	2408	2436	-0.062	1178	1230	1174	1262	97708
32	21	22	AlexaAntiMouseAb~N/A	HA20457~B32R22C21	20350	38400	110	1225	1218	487	39	47	47	60	73	121	97	96	0	6199	5465	1887	34	105	105	152	119	78	100	98	0	0.193	0.218	0.202	0.207	2.525	0.200	0.778	80	596	100	7272	6531	-2.371	1178	6094	1171	5360	97447
5	1	5	Hs~Ref:NM_138414.1~uORF:IOH10524~RFU:26171.4	HA20457~B05R05C01	2680	8070	110	1225	1191	524	43	49	49	98	153	156	100	100	0	1249	1319	127	9	177	177	314	289	92	100	100	0	1.097	1.000	1.069	0.898	1.565	1.122	0.590	80	570	100	2248	2284	0.134	1176	1072	1142	1142	95240
21	9	6	Hs~MGC:BC064940.1~uORF:IOH39946~RFU:20036.03	HA20457~B21R06C09	4380	26260	110	1223	1374	478	34	48	48	51	30	58	100	100	0	1073	1069	124	11	115	115	119	34	28	100	100	0	1.227	1.390	1.271	1.312	1.398	1.499	0.734	80	590	100	2133	2280	0.295	1175	958	1326	954	109883
34	18	20	Hs~Ref:NM_207286.1~uORF:IOH50103~RFU:16020.28	HA20457~B34R20C18	10730	42540	110	1223	1205	430	35	50	50	71	65	91	100	100	0	2004	1970	148	7	225	225	236	65	27	100	100	0	0.659	0.662	0.674	0.613	1.480	0.659	0.715	80	558	100	2952	2900	-0.601	1173	1779	1155	1745	96408
30	21	16	Hs~MGC:BC018906.2~uORF:IOH57152~RFU:21896.39	HA20457~B30R16C21	11310	37260	110	1222	1490	919	61	48	48	59	64	108	100	100	0	569	581	60	10	111	111	122	62	50	100	100	0	2.563	3.068	2.669	2.545	1.956	6.146	0.398	80	584	100	1632	1912	1.358	1174	458	1442	470	119197
11	1	8	Hs~Ref:NM_021822.1~uORF:IOH13894~RFU:11487.99	HA20457~B11R08C01	11690	13090	110	1220	1275	607	47	47	47	51	26	50	100	98	0	866	851	71	8	91	91	94	15	15	100	100	0	1.514	1.616	1.582	1.404	1.853	2.096	0.687	80	589	100	1948	1988	0.598	1173	775	1228	760	101974
32	13	9	Hs~Ref:NM_001030002.1~uORF:IOH55430~RFU:42469.43	HA20457~B32R09C13	18710	35810	110	1220	1223	519	42	50	50	129	184	142	97	93	0	1057	1069	120	11	90	90	214	172	80	100	100	0	1.210	1.198	1.122	1.016	2.027	1.482	0.629	80	542	100	2137	2152	0.275	1170	967	1173	979	97860
27	1	17	Hs~MGC:BC015600.1~uORF:IOH12286~RFU:2537.12	HA20457~B27R17C01	11830	32940	110	1220	1132	579	51	48	48	54	63	116	98	96	0	215	226	59	26	106	106	108	18	16	100	98	0	10.752	9.033	9.867	8.081	2.045	10.639	0.743	80	588	100	1281	1204	3.427	1172	109	1084	120	90540
28	15	8	Hs~MGC:NM_153645.1~uORF:IOH11663~RFU:47553.94	HA20457~B28R08C15	19120	31070	110	1219	1195	426	35	49	49	63	56	88	100	100	0	867	868	60	6	87	87	100	46	46	100	100	0	1.500	1.467	1.536	1.369	1.540	1.644	0.597	80	608	100	1950	1927	0.585	1170	780	1146	781	95602
26	6	8	Hs~Ref:NM_014721.1~uORF:IOH60008~RFU:9295.85	HA20457~B26R08C06	8310	31170	110	1218	1211	479	39	48	48	54	37	68	100	100	0	652	664	186	28	157	157	158	33	20	100	100	0	2.364	2.294	2.511	2.159	1.742	2.727	0.662	80	576	100	1665	1670	1.241	1170	495	1163	507	96894
35	22	16	Hs~MGC:BC012887.1~uORF:IOH25768~RFU:16283.84	HA20457~B35R16C22	16040	41690	110	1217	1256	572	45	46	46	57	64	112	100	100	0	2227	2229	251	11	131	131	144	98	68	100	100	0	0.559	0.577	0.551	0.518	1.746	0.558	0.540	80	591	100	3267	3308	-0.840	1171	2096	1210	2098	100487
17	9	7	Hs~Ref:NM_007054.1~uORF:IOH26900~RFU:13494.54	HA20457~B17R07C09	4320	21970	110	1215	1367	446	32	48	48	51	25	49	100	100	0	1893	1856	234	12	101	101	108	27	25	100	100	0	0.651	0.752	0.732	0.716	1.343	0.777	0.834	80	575	100	2959	3074	-0.619	1167	1792	1319	1755	109337
13	17	3	Hs~MGC:BC002430.1~uORF:IOH4273~RFU:7123.33	HA20457~B13R03C17	5940	16660	110	1215	1313	485	36	48	48	57	41	71	100	100	0	1068	1050	167	15	104	104	113	29	25	100	100	0	1.211	1.337	1.291	1.268	1.560	1.572	0.713	80	559	100	2131	2211	0.276	1167	964	1265	946	105043
26	5	7	Hs~Ref:NM_022551.2~uORF:IOH41520~RFU:6861.05	HA20457~B26R07C05	8110	30970	110	1215	1169	333	28	48	48	52	43	82	100	100	0	1311	1303	140	10	143	143	148	31	20	100	100	0	0.999	0.966	0.941	0.931	1.364	1.124	0.730	80	577	100	2335	2281	-0.001	1167	1168	1121	1160	93551
26	3	1	ERa~N/A	HA20457~B26R01C03	7710	29750	110	1215	1121	444	39	49	49	56	49	87	100	100	0	979	990	85	8	121	121	129	32	24	100	100	0	1.359	1.234	1.328	1.106	1.700	1.454	0.730	80	606	100	2024	1941	0.443	1166	858	1072	869	89697
5	17	5	Hs~Ref:NM_004088.1~uORF:IOH11297~RFU:31298.36	HA20457~B05R05C17	5870	8060	110	1214	1420	734	51	48	48	69	91	131	100	100	0	1818	1886	194	10	101	101	126	94	74	100	100	0	0.679	0.769	0.656	0.686	1.575	0.831	0.666	80	568	100	2883	3157	-0.558	1166	1717	1372	1785	113636
4	20	17	Hs~MGC:BC006177.1~uORF:IOH6666~RFU:6326.42	HA20457~B04R17C20	20000	5900	110	1214	1372	678	49	49	49	66	56	84	100	100	0	798	784	130	16	171	171	180	60	33	100	100	0	1.858	2.158	1.908	1.986	1.632	2.806	0.649	80	559	100	1792	1936	0.894	1165	627	1323	613	109727
40	6	12	Hs~Ref:NM_007285.5~uORF:IOH7450~RFU:7576.26	HA20457~B40R12C06	17390	45420	110	1213	1364	487	35	47	47	70	125	178	100	100	0	2477	2452	204	8	131	131	159	129	81	100	100	0	0.497	0.567	0.516	0.530	1.523	0.560	0.731	80	577	100	3512	3638	-1.009	1166	2346	1317	2321	109118
9	16	18	Hs~Ref:NM_003862.1~uORF:IOH6319~RFU:10323.14	HA20457~B09R18C16	5730	15130	110	1213	1238	375	30	48	48	51	21	41	100	100	0	983	943	135	14	92	92	100	30	30	100	100	0	1.308	1.398	1.445	1.342	1.477	1.574	0.790	80	577	100	2056	2041	0.387	1165	891	1190	851	99028
8	6	8	Hs~Ref:NM_001896.1~N/A~RFU:27168.9	HA20457~B08R08C06	17170	8580	110	1212	1342	490	36	48	48	118	207	175	100	100	0	2337	2336	122	5	95	95	151	169	111	100	100	0	0.519	0.577	0.558	0.536	1.475	0.554	0.635	80	526	100	3406	3535	-0.946	1164	2242	1294	2241	107388
47	4	1	ERa~N/A	HA20457~B47R01C04	12560	52240	110	1212	1296	530	40	47	47	89	122	137	100	100	0	1068	1109	124	11	154	154	170	46	27	100	100	0	1.275	1.308	1.174	1.186	1.608	1.484	0.729	80	556	100	2079	2204	0.350	1165	914	1249	955	103713
8	14	7	Hs~Ref:NM_003897.2~uORF:IOH6603~RFU:8906.11	HA20457~B08R07C14	18770	8370	110	1210	1185	438	36	47	47	48	12	25	100	100	0	1060	1033	105	10	106	106	109	21	19	100	100	0	1.219	1.228	1.190	1.117	1.665	1.471	0.669	80	558	100	2117	2065	0.286	1163	954	1138	927	94829
46	17	7	Hs~Ref:NM_004734.1~N/A~RFU:27846.07	HA20457~B46R07C17	10640	53450	110	1209	1278	422	33	51	51	132	171	129	100	100	0	1550	1561	140	8	250	250	268	99	36	100	100	0	0.891	0.936	0.902	0.886	1.454	0.997	0.644	80	577	100	2458	2538	-0.167	1158	1300	1227	1311	102268
16	20	14	Hs~MGC:BC002559.1~uORF:IOH4053~RFU:22347.16	HA20457~B16R14C20	20080	18810	110	1209	1218	799	65	51	51	115	176	153	100	81	0	1740	1701	148	8	173	173	161	57	35	100	100	0	0.739	0.764	0.756	0.585	2.177	0.904	0.508	80	577	100	2725	2695	-0.436	1158	1567	1167	1528	97409
28	16	12	Hs~MGC:BC101007.1~uORF:IOH63458~RFU:6608.07	HA20457~B28R12C16	19320	31880	110	1207	1266	399	31	48	48	48	6	12	100	100	0	650	648	75	11	80	80	82	20	24	100	100	0	2.033	2.144	2.107	2.016	1.483	2.416	0.817	80	567	100	1729	1786	1.024	1159	570	1218	568	101249
16	3	14	Hs~MGC:BC004236.2~uORF:IOH3887~RFU:8210.57	HA20457~B16R14C03	16670	18820	110	1207	1257	338	26	54	54	226	303	134	100	96	0	2897	3758	4983	132	135	135	411	434	105	100	100	0	0.417	0.332	0.414	0.385	1.660	0.096	0.213	80	576	100	3915	4826	-1.260	1153	2762	1203	3623	100530
40	11	15	Hs~Ref:NM_003517.2~uORF:IOH29296~RFU:17865.51	HA20457~B40R15C11	18390	46020	110	1207	1238	422	34	46	46	50	29	58	100	100	0	1877	1802	217	12	135	135	142	45	31	100	100	0	0.666	0.715	0.683	0.670	1.464	0.760	0.763	80	548	100	2903	2859	-0.585	1161	1742	1192	1667	99035
9	20	2	Hs~MGC:BC030538.2~uORF:IOH21627~RFU:7799.13	HA20457~B09R02C20	6500	11920	110	1207	1162	394	33	47	47	68	93	136	98	98	0	977	969	99	10	100	100	148	260	175	100	100	0	1.323	1.283	1.378	1.184	1.642	1.316	0.676	80	585	100	2037	1984	0.403	1160	877	1115	869	92951
44	21	13	Hs~MGC:BC004921.1~uORF:IOH5220~RFU:22046.13	HA20457~B44R13C21	20440	50060	110	1206	1284	608	47	47	47	60	96	160	100	100	0	863	886	91	10	119	119	136	60	44	100	100	0	1.558	1.613	1.496	1.437	1.619	2.399	0.574	80	570	100	1903	2004	0.640	1159	744	1237	767	102753
23	2	14	Hs~MGC:BC067735.1~uORF:IOH40060~RFU:43098.03	HA20457~B23R14C02	11950	27830	110	1206	1220	423	34	48	48	61	55	90	100	100	0	1457	1449	79	5	112	112	127	43	33	100	100	0	0.861	0.877	0.860	0.815	1.515	0.884	0.741	80	558	100	2503	2509	-0.216	1158	1345	1172	1337	97581
24	18	12	Hs~Ref:NM_207356.1~uORF:IOH40044~RFU:43692.14	HA20457~B24R12C18	19680	27400	110	1206	1213	492	40	48	48	90	116	128	100	100	0	1106	1096	104	9	82	82	129	99	76	100	100	0	1.131	1.149	1.166	1.034	1.712	1.332	0.677	80	566	100	2182	2179	0.177	1158	1024	1165	1014	97034
14	1	10	Hs~Ref:NM_004286.2~uORF:IOH14552~RFU:32706.33	HA20457~B14R10C01	7170	18050	110	1206	1205	395	32	49	49	120	165	137	100	98	0	1804	1770	198	11	101	101	186	162	87	100	100	0	0.679	0.693	0.695	0.652	1.473	0.735	0.650	80	604	100	2860	2825	-0.558	1157	1703	1156	1669	96423
7	1	5	Hs~MGC:BC014299.2~uORF:IOH12128~RFU:13075.71	HA20457~B07R05C01	11710	8030	110	1205	1182	323	27	48	48	64	64	100	100	100	0	1017	1007	67	6	103	103	121	46	38	100	100	0	1.266	1.254	1.220	1.205	1.392	1.385	0.794	80	570	100	2071	2038	0.340	1157	914	1134	904	94538
12	22	16	Hs~Ref:NM_002923.1~uORF:IOH7121~RFU:20307.85	HA20457~B12R16C22	20430	14690	110	1205	1170	408	34	48	48	50	14	28	100	100	0	867	818	145	17	136	136	137	17	12	98	98	0	1.583	1.645	1.708	1.626	1.827	1.850	0.746	80	599	100	1888	1804	0.662	1157	731	1122	682	93622
8	5	15	Hs~Ref:NM_000998.3~uORF:IOH1576~RFU:3562.23	HA20457~B08R15C05	16980	9980	110	1204	1388	551	39	47	47	51	24	47	100	100	0	1281	1217	241	19	92	92	96	19	19	100	100	0	0.973	1.192	1.122	1.135	1.615	1.439	0.708	80	565	100	2346	2466	-0.039	1157	1189	1341	1125	111043
38	13	18	Hs~MGC:BC033886.2~uORF:IOH27178~RFU:4032.75	HA20457~B38R18C13	9760	46650	110	1204	1298	663	51	46	46	49	14	28	100	100	0	1031	942	239	25	142	142	146	16	10	100	100	0	1.303	1.565	1.442	1.393	2.041	1.926	0.701	80	553	100	2047	2052	0.381	1158	889	1252	800	103874
47	17	7	Hs~MGC:BC028040.1~uORF:IOH11532~RFU:14417.03	HA20457~B47R07C17	15170	53400	110	1204	1243	601	48	47	47	53	36	67	100	100	0	1001	1015	133	13	146	146	155	53	34	100	100	0	1.353	1.376	1.321	1.209	1.617	1.694	0.748	80	577	100	2012	2065	0.436	1157	855	1196	869	99466
16	22	2	Hs~MGC:BC009350.1~uORF:IOH14087~RFU:3254.37	HA20457~B16R02C22	20460	16410	110	1202	1370	688	50	47	47	48	8	16	100	100	0	940	898	169	18	119	119	175	110	62	100	100	0	1.407	1.698	1.521	1.461	1.730	2.128	0.762	80	580	100	1976	2102	0.492	1155	821	1323	779	109569
47	6	18	Hs~Ref:NM_007284.1~uORF:IOH5114~RFU:23205.92	HA20457~B47R18C06	12990	55620	110	1202	1149	288	25	49	49	116	141	121	100	100	0	674	675	90	13	240	240	260	100	38	100	100	0	2.657	2.529	2.356	2.459	1.427	2.549	0.680	80	538	100	1587	1535	1.410	1153	434	1100	435	91889
4	22	17	Hs~Ref:NM_004456.2~uORF:IOH9963~RFU:10051.31	HA20457~B04R17C22	20390	5890	110	1201	1185	476	40	47	47	60	76	126	100	100	0	959	954	117	12	307	307	315	55	17	100	98	0	1.770	1.759	1.656	1.654	1.580	2.041	0.671	80	580	100	1806	1785	0.824	1154	652	1138	647	94812
12	19	7	Hs~Ref:NM_018270.3~uORF:IOH14702~RFU:31572.05	HA20457~B12R07C19	19810	12890	110	1200	1252	410	32	55	55	175	212	121	100	95	0	850	842	101	11	195	195	225	115	51	100	100	0	1.748	1.850	1.796	1.744	1.495	2.275	0.587	80	585	100	1800	1844	0.806	1145	655	1197	647	100187
32	15	6	Hs~Ref:NM_198217.1~uORF:IOH59743~RFU:6733.63	HA20457~B32R06C15	19130	35200	110	1200	1206	464	38	47	47	47	5	10	100	100	0	1144	1113	228	20	79	79	81	16	19	100	100	0	1.083	1.121	1.192	1.083	1.582	1.238	0.731	80	567	100	2218	2193	0.115	1153	1065	1159	1034	96446
41	2	12	Hs~Ref:NM_014570.2~uORF:IOH5693~RFU:29063.43	HA20457~B41R12C02	3130	50000	110	1200	1193	461	38	47	47	57	36	63	100	100	0	916	939	111	11	242	242	292	119	40	100	100	0	1.711	1.644	1.652	1.500	1.694	1.920	0.650	80	576	100	1827	1843	0.775	1153	674	1146	697	95435
41	21	2	Hs~MGC:BC024184.2~uORF:IOH10751~RFU:12360.49	HA20457~B41R02C21	6920	47950	110	1199	1180	468	39	48	48	64	79	123	98	98	0	1167	1141	174	15	152	152	259	198	76	100	100	0	1.134	1.145	1.108	1.000	2.112	1.384	0.635	80	572	100	2166	2121	0.181	1151	1015	1132	989	94381
36	20	2	Hs~MGC:BC001370.2~uORF:IOH3980~RFU:58000.37	HA20457~B36R02C20	20210	38870	110	1198	1250	425	34	48	48	64	93	145	100	100	0	901	912	55	6	84	84	102	60	58	100	100	0	1.408	1.452	1.352	1.365	1.438	1.598	0.748	80	557	100	1967	2030	0.493	1150	817	1202	828	100017
17	4	10	Hs~Ref:NM_078467.1~uORF:IOH4470~RFU:21068.64	HA20457~B17R10C04	3320	22580	110	1197	1210	476	39	47	47	73	187	256	98	98	0	978	974	74	7	110	110	123	151	122	100	100	0	1.325	1.346	1.380	1.227	1.572	1.535	0.735	80	548	100	2018	2027	0.406	1150	868	1163	864	96833
40	1	16	Hs~IVGN:NM_001206389~CAT_PHG0184~N/A	HA20457~B40R16C01	16390	46230	110	1196	1209	435	35	49	49	66	61	92	100	100	0	910	937	196	20	203	203	208	44	21	100	100	0	1.622	1.580	1.550	1.489	1.614	1.807	0.676	80	606	100	1854	1894	0.698	1147	707	1160	734	96695
42	11	17	Hs~Ref:NM_021062.2~uORF:IOH35040~RFU:7045.85	HA20457~B42R17C11	9400	50930	110	1195	1384	524	37	46	46	49	20	40	100	100	0	1761	1869	428	22	166	166	256	320	125	100	100	0	0.720	0.786	0.720	0.753	1.670	0.726	0.437	80	544	100	2744	3041	-0.473	1149	1595	1338	1703	110746
28	16	8	Hs~MGC:NM_153645.1~uORF:IOH11663~RFU:46634.28	HA20457~B28R08C16	19320	31070	110	1195	1294	492	38	48	48	58	43	74	100	100	0	860	855	86	10	80	80	91	42	46	100	100	0	1.471	1.608	1.489	1.491	1.586	1.896	0.655	80	577	100	1927	2021	0.556	1147	780	1246	775	103502
27	18	6	Hs~Ref:NM_006388.2~uORF:IOH39963~RFU:32857.14	HA20457~B27R06C18	15220	30720	110	1195	1173	439	37	47	47	57	53	92	100	100	0	599	597	42	7	111	111	118	38	32	100	100	0	2.352	2.317	2.266	2.144	1.514	2.812	0.746	80	566	100	1636	1612	1.234	1148	488	1126	486	93805
48	16	13	Hs~MGC:BC035348.1~uORF:IOH28673~RFU:3612.35	HA20457~B48R13C16	19500	54620	110	1192	1289	528	40	47	47	60	59	98	100	98	0	772	764	99	12	159	159	169	37	21	100	100	0	1.868	2.053	1.975	1.870	1.595	2.716	0.668	80	566	100	1758	1847	0.901	1145	613	1242	605	103153
39	20	13	Hs~MGC:BC012933.1~uORF:IOH11173~RFU:15908.67	HA20457~B39R13C20	15680	45620	110	1191	1268	697	54	48	48	188	378	201	88	73	0	392	390	57	14	122	122	152	68	44	100	98	0	4.233	4.552	4.259	3.726	2.063	7.814	0.551	80	585	100	1413	1488	2.082	1143	270	1220	268	101424
6	21	11	Hs~Ref:NM_005801.2~uORF:IOH6916~RFU:27382.81	HA20457~B06R11C21	11170	9220	110	1191	1258	370	29	49	49	163	237	145	100	100	0	1877	1838	232	12	111	111	329	360	109	100	100	0	0.647	0.700	0.622	0.675	1.428	0.686	0.688	80	568	100	2908	2936	-0.629	1142	1766	1209	1727	100664
9	2	10	Hs~MGC:BC051790.1~uORF:IOH26984~RFU:40351.56	HA20457~B09R10C02	2900	13530	110	1191	1195	502	42	237	237	314	277	88	96	71	0	1053	1096	133	12	399	399	428	174	40	100	100	0	1.459	1.374	1.256	1.186	1.795	1.908	0.523	80	566	100	1608	1655	0.545	954	654	958	697	95594
23	17	2	Hs~Ref:NM_144714.1~uORF:IOH11221~RFU:3560.04	HA20457~B23R02C17	14950	25420	110	1191	1178	419	35	49	49	59	66	111	100	100	0	1252	1243	179	14	100	100	107	40	37	100	100	0	0.991	0.988	0.974	0.921	1.483	1.028	0.761	80	566	100	2294	2272	-0.013	1142	1152	1129	1143	94222
12	18	12	Hs~MGC:BC103660.1~uORF:IOH63319~RFU:7550.22	HA20457~B12R12C18	19620	13890	110	1191	1149	343	29	46	46	48	22	45	100	100	0	852	833	136	16	91	91	96	18	18	100	100	0	1.505	1.487	1.542	1.429	1.493	1.612	0.867	80	576	100	1906	1845	0.589	1145	761	1103	742	91920
47	21	20	Hs~Ref:NM_005318.2~uORF:IOH2970~RFU:4897.38	HA20457~B47R20C21	15990	56010	110	1190	1237	495	40	47	47	50	18	36	100	100	0	1190	1112	219	19	145	145	165	57	34	100	100	0	1.094	1.231	1.253	1.149	1.479	1.366	0.777	80	584	100	2188	2157	0.129	1143	1045	1190	967	98948
1	1	13	Hs~MGC:BC023144.1~uORF:IOH10881~RFU:29453.06	HA20457~B01R13C01	2650	5190	110	1188	1149	473	41	47	47	90	184	204	96	91	0	1677	1689	161	9	150	150	207	182	87	100	100	0	0.747	0.716	0.714	0.581	2.353	0.907	0.655	80	571	100	2668	2641	-0.420	1141	1527	1102	1539	91949
23	18	19	Hs~Ref:XM_379306.1~uORF:IOH43607~RFU:3468.34	HA20457~B23R19C18	15170	28830	110	1185	1205	612	50	47	47	49	21	42	100	100	0	335	329	51	15	96	96	98	14	14	100	100	0	4.762	4.970	4.733	4.240	1.793	6.165	0.760	80	558	100	1377	1391	2.251	1138	239	1158	233	96399
28	8	8	Hs~Ref:NM_005371.2~uORF:IOH4172~RFU:37132.63	HA20457~B28R08C08	17680	31100	110	1184	1368	673	49	52	52	339	503	148	88	71	0	1233	1070	345	32	104	104	313	322	102	100	70	0	1.003	1.362	1.267	1.264	1.438	2.008	0.634	80	532	100	2261	2282	0.004	1132	1129	1316	966	109439
33	3	5	Hs~MGC:BC000381.2~uORF:IOH3454~RFU:12074.24	HA20457~B33R05C03	3250	39540	110	1184	1250	415	33	123	123	177	160	90	100	98	0	2329	2282	205	8	357	357	348	101	29	100	100	0	0.538	0.585	0.569	0.546	1.486	0.589	0.629	80	586	100	3033	3052	-0.894	1061	1972	1127	1925	99968
45	15	8	Hs~Ref:NM_002515.2~uORF:IOH45733~RFU:11891.74	HA20457~B45R08C15	5690	53650	110	1183	1340	628	46	48	48	78	79	101	100	98	0	1229	1158	320	27	187	187	195	25	12	100	100	0	1.089	1.331	1.254	1.310	1.639	1.498	0.684	80	564	100	2177	2263	0.123	1135	1042	1292	971	107176
48	20	7	Hs~Ref:NM_002595.1~N/A~RFU:11482.51	HA20457~B48R07C20	20300	53420	110	1183	1311	645	49	45	45	46	3	6	100	100	0	967	937	146	15	109	109	111	14	12	100	100	0	1.326	1.529	1.533	1.349	1.684	1.890	0.715	80	558	100	1996	2094	0.407	1138	858	1266	828	104896
31	9	13	Hs~Ref:NM_001008572.1~uORF:IOH45757~RFU:17954.15	HA20457~B31R13C09	13400	36630	110	1183	1191	473	39	47	47	50	31	62	100	100	0	801	890	302	33	101	101	103	11	10	100	100	0	1.623	1.450	1.457	1.381	1.710	1.602	0.654	80	566	100	1836	1933	0.699	1136	700	1144	789	95264
40	6	5	Hs~Ref:NM_015971.2~uORF:IOH1875~RFU:21376.49	HA20457~B40R05C06	17380	44020	110	1183	1172	364	31	47	47	50	22	44	100	100	0	850	841	51	6	119	119	121	10	8	100	100	0	1.554	1.558	1.505	1.478	1.426	1.734	0.826	80	566	100	1867	1847	0.636	1136	731	1125	722	93791
40	1	12	Hs~Ref:NM_004846.1~uORF:IOH6102~RFU:39071.8	HA20457~B40R12C01	16390	45420	110	1181	1193	495	41	49	49	71	68	95	100	100	0	1044	1046	55	5	224	224	245	104	42	100	100	0	1.380	1.392	1.351	1.255	1.618	1.683	0.683	80	590	100	1952	1966	0.465	1132	820	1144	822	95404
9	8	4	Hs~MGC:BC024187.2~uORF:IOH10699~RFU:25926.34	HA20457~B09R04C08	4110	12330	110	1179	1418	624	44	49	49	70	76	108	100	100	0	1486	1478	134	9	120	120	128	47	36	100	100	0	0.827	1.008	0.869	0.914	1.514	1.266	0.698	80	599	100	2496	2727	-0.274	1130	1366	1369	1358	113424
24	19	9	Hs~Ref:NM_014077.1~uORF:IOH4219~RFU:18087.34	HA20457~B24R09C19	19880	26800	110	1179	1385	795	57	48	48	51	24	47	100	100	0	821	817	109	13	80	80	81	10	12	100	100	0	1.526	1.814	1.496	1.528	1.859	2.648	0.613	80	586	100	1872	2074	0.610	1131	741	1337	737	110774
11	18	9	Hs~Ref:NM_016505.2~uORF:IOH6093~RFU:17217.25	HA20457~B11R09C18	15090	13280	110	1179	1240	376	30	48	48	74	87	117	100	100	0	1942	1937	74	3	92	92	114	44	38	100	100	0	0.611	0.646	0.608	0.614	1.400	0.620	0.759	80	558	100	2981	3037	-0.710	1131	1850	1192	1845	99232
9	15	3	Hs~Ref:NM_005617.2~uORF:IOH10433~RFU:7414.85	HA20457~B09R03C15	5510	12130	110	1179	1168	431	36	47	47	54	29	53	100	100	0	853	817	143	17	106	106	112	24	21	100	100	0	1.515	1.577	1.496	1.481	1.417	1.734	0.851	80	576	100	1879	1832	0.600	1132	747	1121	711	93449
22	17	8	Hs~Ref:NM_144664.3~uORF:IOH45592~RFU:23033.84	HA20457~B22R08C17	10430	26620	110	1178	1271	493	38	49	49	50	13	26	100	100	0	1637	1642	84	5	91	91	99	24	24	100	100	0	0.730	0.788	0.751	0.725	1.526	0.837	0.707	80	567	100	2675	2773	-0.453	1129	1546	1222	1551	101695
2	14	6	Hs~Ref:NM_032641.1~uORF:IOH4981~RFU:17874.45	HA20457~B02R06C14	9750	3770	110	1178	1229	402	32	49	49	66	96	145	100	100	0	1009	1028	105	10	115	115	120	21	17	100	100	0	1.263	1.292	1.314	1.225	1.468	1.411	0.650	80	567	100	2023	2093	0.337	1129	894	1180	913	98311
16	10	13	Hs~Ref:NM_004927.1~uORF:IOH5582~RFU:8101.53	HA20457~B16R13C10	18080	18620	110	1177	1207	529	43	49	49	53	29	54	100	100	0	1409	1373	229	16	94	94	96	15	15	100	100	0	0.858	0.905	0.855	0.817	1.730	1.025	0.679	80	567	100	2443	2437	-0.221	1128	1315	1158	1279	96588
16	1	9	Hs~Ref:NM_003524.2~uORF:IOH58715~RFU:17491.27	HA20457~B16R09C01	16290	17810	110	1177	1140	451	39	48	48	57	33	57	100	100	0	1533	1503	126	8	93	93	99	27	27	100	100	0	0.784	0.774	0.823	0.694	1.756	0.843	0.691	80	568	100	2569	2502	-0.351	1129	1440	1092	1410	91177
8	18	5	Hs~Ref:NM_003691.1~N/A~RFU:22965.07	HA20457~B08R05C18	19570	7970	110	1177	1117	512	45	51	51	85	70	82	100	100	0	560	557	37	6	205	205	198	58	29	100	100	0	3.172	3.028	3.113	2.724	1.712	3.871	0.597	80	586	100	1481	1418	1.665	1126	355	1066	352	89384
31	7	9	Hs~MGC:BC033621.2~uORF:IOH21688~RFU:13900.67	HA20457~B31R09C07	13000	35830	110	1176	1231	589	47	47	47	52	29	55	100	100	0	1841	2046	1261	61	105	105	113	48	42	100	100	0	0.650	0.610	0.608	0.587	1.534	0.505	0.662	80	558	100	2865	3125	-0.621	1129	1736	1184	1941	98453
20	11	4	Hs~MGC:BC013073.1~uORF:IOH10173~RFU:7466.16	HA20457~B20R04C11	18240	21290	110	1175	1188	460	38	48	48	54	32	59	100	100	0	923	906	143	15	90	90	95	23	24	100	100	0	1.353	1.397	1.452	1.296	1.566	1.579	0.771	80	546	100	1960	1956	0.436	1127	833	1140	816	95061
48	1	5	Hs~Ref:NM_016073.2~uORF:IOH10649~RFU:14096.91	HA20457~B48R05C01	16490	53040	110	1174	1507	707	46	374	374	456	453	99	91	45	0	1702	1740	269	15	466	466	411	176	42	100	100	0	0.647	0.889	0.628	0.754	2.081	1.186	0.305	80	589	100	2036	2407	-0.628	800	1236	1133	1274	120533
5	1	21	Hs~Ref:NM_001000.2~uORF:IOH4200~RFU:11965.07	HA20457~B05R21C01	2690	11280	110	1173	1368	640	46	48	48	54	48	88	100	100	0	2463	2369	344	14	108	108	116	40	34	100	100	0	0.478	0.584	0.519	0.536	1.558	0.592	0.686	80	580	100	3480	3581	-1.066	1125	2355	1320	2261	109411
43	4	7	Hs~Ref:NM_022063.1~uORF:IOH27864~RFU:9929.04	HA20457~B43R07C04	12490	48900	110	1173	1272	687	54	48	48	61	76	124	100	100	0	1499	1507	139	9	162	162	173	49	28	100	100	0	0.841	0.910	0.866	0.763	1.963	1.095	0.574	80	568	100	2462	2569	-0.249	1125	1337	1224	1345	101763
41	5	12	Hs~MGC:NM_030645.1~uORF:IOH14805~RFU:26760.6	HA20457~B41R12C05	3740	49990	110	1172	1177	466	39	49	49	81	79	97	100	100	0	1107	1115	174	15	263	263	280	93	33	100	100	0	1.331	1.324	1.288	1.234	1.650	1.514	0.548	80	577	100	1967	1980	0.412	1123	844	1128	852	94136
21	5	12	Hs~MGC:BC002921.2~uORF:IOH6311~RFU:51108.08	HA20457~B21R12C05	3580	27460	110	1170	1152	399	34	48	48	62	75	120	100	100	0	1451	1496	130	8	113	113	131	73	55	100	100	0	0.839	0.798	0.764	0.746	1.460	0.824	0.783	80	577	100	2460	2487	-0.254	1122	1338	1104	1383	92124
1	18	5	Hs~Ref:NM_003516.2~uORF:IOH4867~RFU:9659.6	HA20457~B01R05C18	6040	3560	110	1169	1259	581	46	47	47	48	12	25	100	97	0	1815	1755	221	12	114	114	115	11	9	100	100	0	0.660	0.739	0.716	0.596	2.329	0.852	0.739	80	584	100	2823	2853	-0.600	1122	1701	1212	1641	100681
20	14	3	Hs~Ref:NM_199124.1~uORF:IOH43439~RFU:45466.16	HA20457~B20R03C14	18830	21080	110	1168	1173	349	29	50	50	319	507	158	97	63	0	1239	1226	93	7	81	81	247	401	162	100	100	0	0.965	0.981	0.934	0.934	1.386	1.488	0.564	80	557	100	2276	2268	-0.051	1118	1158	1123	1145	93847
37	4	20	Hs~MGC:BC001132.1~uORF:IOH3853~RFU:15693.82	HA20457~B37R20C04	3490	47090	110	1167	1326	447	33	57	57	116	119	102	100	100	0	2484	2456	281	11	275	275	309	116	37	100	100	0	0.502	0.582	0.538	0.554	1.390	0.555	0.746	80	585	100	3319	3450	-0.993	1110	2209	1269	2181	106104
14	9	8	Hs~MGC:BC002955.1~uORF:IOH4931~RFU:17697.6	HA20457~B14R08C09	8780	17630	110	1167	1253	566	45	48	48	52	22	42	100	100	0	921	905	82	9	107	107	110	23	20	100	100	0	1.375	1.510	1.316	1.345	1.687	1.873	0.640	80	567	100	1933	2003	0.459	1119	814	1205	798	100239
44	13	7	Hs~MGC:BC002519.2~uORF:IOH62827~RFU:23195.68	HA20457~B44R07C13	18830	48860	110	1167	1149	402	34	47	47	52	28	53	100	100	0	1211	1235	152	12	150	150	167	62	37	100	100	0	1.056	1.016	0.967	0.941	1.658	0.995	0.674	80	576	100	2181	2187	0.078	1120	1061	1102	1085	91933
9	19	5	Hs~Ref:NM_152736.2~uORF:IOH14153~RFU:8804.59	HA20457~B09R05C19	6310	12520	110	1166	1255	546	43	47	47	50	18	36	100	100	0	1106	1099	109	9	101	101	107	20	18	100	100	0	1.113	1.210	1.073	1.078	1.726	1.386	0.674	80	576	100	2124	2206	0.155	1119	1005	1208	998	100411
32	21	11	Hs~MGC:BC010697.1~uORF:IOH9799~RFU:13622.58	HA20457~B32R11C21	20330	36200	110	1166	1225	507	41	47	47	47	2	4	100	100	0	1299	1323	402	30	88	88	90	14	15	100	100	0	0.924	0.954	0.947	0.926	1.643	0.938	0.644	80	544	100	2330	2413	-0.114	1119	1211	1178	1235	97999
19	1	19	Hs~Ref:NM_003512.3~uORF:IOH14485~RFU:17652.84	HA20457~B19R19C01	11810	24320	110	1166	1196	344	28	50	50	134	172	128	100	100	0	1631	1643	95	5	138	138	192	114	59	100	100	0	0.747	0.761	0.766	0.726	1.422	0.701	0.692	80	576	100	2609	2651	-0.420	1116	1493	1146	1505	95661
46	16	12	Hs~MGC:BC016640.1~uORF:IOH21476~RFU:11675.76	HA20457~B46R12C16	10430	54450	110	1166	1175	606	51	46	46	55	37	67	100	100	0	869	849	84	9	188	188	190	21	11	100	100	0	1.645	1.708	1.687	1.443	1.833	2.208	0.710	80	558	100	1801	1790	0.718	1120	681	1129	661	93991
7	20	7	Hs~Ref:NM_032476.1~uORF:IOH13845~RFU:32048.03	HA20457~B07R07C20	15510	8410	110	1165	1387	581	41	48	48	85	132	155	100	100	0	1027	1011	78	7	107	107	128	57	44	100	100	0	1.214	1.481	1.353	1.362	1.547	1.841	0.682	80	538	100	2037	2243	0.280	1117	920	1339	904	110963
43	2	3	Hs~Ref:NM_001657.2~uORF:IOH13747~RFU:7674.67	HA20457~B43R03C02	12090	48110	110	1164	1195	488	40	47	47	50	20	40	100	100	0	658	656	41	6	156	156	166	42	25	100	100	0	2.225	2.296	2.187	2.081	1.638	2.932	0.675	80	549	100	1619	1648	1.154	1117	502	1148	500	95602
43	1	15	Hs~Ref:NM_014955.2~uORF:IOH45543~RFU:14610.26	HA20457~B43R15C01	11900	50500	110	1164	1170	402	34	47	47	66	115	174	100	98	0	1035	1050	86	8	215	215	221	48	21	100	100	0	1.362	1.345	1.298	1.250	1.557	1.644	0.692	80	609	100	1937	1958	0.446	1117	820	1123	835	93608
16	16	17	Hs~Ref:NM_022048.1~uORF:IOH21026~RFU:19069.01	HA20457~B16R17C16	19290	19420	110	1164	1111	428	38	48	48	50	16	32	100	100	0	600	596	89	14	87	87	97	30	30	100	100	0	2.175	2.088	2.061	1.867	1.785	2.444	0.773	80	575	100	1629	1572	1.121	1116	513	1063	509	88877
13	21	13	Hs~MGC:BC008623.1~uORF:IOH3309~RFU:15074.24	HA20457~B13R13C21	6740	18660	110	1162	1302	487	37	48	48	59	42	71	100	100	0	2355	2311	146	6	112	112	120	25	20	100	100	0	0.497	0.570	0.534	0.529	1.491	0.565	0.686	80	548	100	3357	3453	-1.010	1114	2243	1254	2199	104191
45	10	12	Hs~MGC:BC033710.1~uORF:IOH21756~RFU:48839.29	HA20457~B45R12C10	4690	54450	110	1162	1178	446	37	48	48	71	74	104	100	97	0	1128	1114	114	10	190	190	198	50	25	100	100	0	1.188	1.223	1.204	1.101	1.688	1.550	0.639	80	577	100	2052	2054	0.248	1114	938	1130	924	94224
13	3	12	Hs~Ref:NM_004111.4~uORF:IOH3530~RFU:28002.23	HA20457~B13R12C03	3150	18470	110	1161	1210	405	33	48	48	78	86	110	100	100	0	1010	1025	130	12	142	142	208	134	64	100	100	0	1.282	1.316	1.201	1.253	1.375	1.490	0.648	80	574	100	1981	2045	0.359	1113	868	1162	883	96836
43	5	8	Hs~MGC:BC011885.1~uORF:IOH14206~RFU:18284.97	HA20457~B43R08C05	12690	49110	110	1161	1175	382	32	379	379	413	351	84	83	61	0	1459	1474	175	11	337	337	302	118	39	100	100	0	0.697	0.700	0.784	0.640	1.889	0.771	0.359	80	565	100	1904	1933	-0.521	782	1122	796	1137	94003
46	9	4	Hs~Ref:NM_033416.1~uORF:IOH12991~RFU:5387.83	HA20457~B46R04C09	9050	52860	110	1161	1175	505	42	46	46	65	69	106	100	100	0	974	929	106	11	178	178	187	35	18	100	100	0	1.401	1.503	1.536	1.353	1.619	1.755	0.775	80	570	100	1911	1880	0.486	1115	796	1129	751	93985
44	22	7	Hs~MGC:BC065731.1~uORF:IOH62864~RFU:22035.9	HA20457~B44R07C22	20620	48860	110	1160	1206	450	37	47	47	48	23	47	98	98	0	1156	1142	84	7	116	116	119	17	14	100	100	0	1.070	1.130	1.070	0.982	2.235	1.262	0.764	80	615	100	2153	2185	0.098	1113	1040	1159	1026	96470
39	5	20	Hs~MGC:BC005004.1~uORF:IOH4814~RFU:13718.38	HA20457~B39R20C05	12680	47040	110	1160	1163	455	39	49	49	62	54	87	100	100	0	1496	1493	78	5	169	169	171	26	15	100	100	0	0.837	0.841	0.823	0.772	1.546	0.874	0.752	80	548	100	2438	2438	-0.256	1111	1327	1114	1324	93017
47	5	8	Hs~Ref:NM_000142.2~N/A~RFU:3609.56	HA20457~B47R08C05	12770	53610	110	1160	1150	390	33	46	46	418	2989	715	0	0	0	703	688	73	10	174	174	179	32	17	100	100	0	2.106	2.148	2.265	2.014	1.527	2.455	0.735	80	558	100	1643	1618	1.074	1114	529	1104	514	91961
39	14	14	Hs~Ref:NM_005398.2~uORF:IOH13809~RFU:4388.95	HA20457~B39R14C14	14470	45820	110	1160	1140	626	54	48	48	142	254	178	83	81	0	336	327	46	14	115	115	148	79	53	98	85	0	5.032	5.151	4.675	3.474	3.277	7.532	0.555	80	554	100	1333	1304	2.331	1112	221	1092	212	91229
46	22	11	Hs~Ref:NM_002364.1~uORF:IOH11315~RFU:42928.76	HA20457~B46R11C22	11640	54250	110	1159	1333	508	38	65	65	350	419	119	96	83	0	1300	1547	753	48	234	234	385	244	63	100	100	0	1.026	0.966	0.947	0.966	1.920	1.074	0.230	80	605	100	2160	2581	0.037	1094	1066	1268	1313	106605
21	8	18	Hs~MGC:BC041366.2~uORF:IOH27747~RFU:31554.59	HA20457~B21R18C08	4190	28650	110	1159	1197	343	28	48	48	61	67	109	100	100	0	924	929	54	5	139	139	143	43	30	100	100	0	1.415	1.454	1.418	1.382	1.410	1.515	0.741	80	577	100	1896	1939	0.501	1111	785	1149	790	95747
27	20	2	Hs~MGC:BC031228.1~uORF:IOH21599~RFU:50586.24	HA20457~B27R02C20	15630	29930	110	1157	1196	490	40	47	47	52	37	71	100	100	0	702	702	58	8	105	105	115	41	35	100	100	0	1.859	1.925	1.841	1.722	1.709	2.311	0.655	80	568	100	1707	1746	0.895	1110	597	1149	597	95716
9	1	10	Hs~MGC:BC051790.1~uORF:IOH26984~RFU:41899.18	HA20457~B09R10C01	2710	13530	110	1156	1262	483	38	51	51	169	212	125	100	100	0	1192	1233	217	17	285	285	324	248	76	100	100	0	1.218	1.277	1.220	1.215	1.418	1.264	0.644	80	589	100	2012	2159	0.285	1105	907	1211	948	100924
18	16	8	Hs~Ref:NM_145271.1~uORF:IOH14111~RFU:8546.94	HA20457~B18R08C16	10230	22100	110	1156	1101	432	39	48	48	48	3	6	100	100	0	849	835	110	13	96	96	98	11	11	100	100	0	1.471	1.425	1.461	1.301	1.553	1.615	0.769	80	536	100	1861	1792	0.557	1108	753	1053	739	88077
29	15	2	Hs~Ref:NM_014065.2~uORF:IOH43942~RFU:6302.4	HA20457~B29R02C15	5650	34430	110	1155	1237	413	33	47	47	48	10	20	100	100	0	872	862	91	10	121	121	122	11	9	100	100	0	1.475	1.606	1.563	1.523	1.425	1.851	0.782	80	577	100	1859	1931	0.561	1108	751	1190	741	98946
5	18	5	Hs~Ref:NM_004088.1~uORF:IOH11297~RFU:32686.01	HA20457~B05R05C18	6070	8060	110	1155	1168	310	26	47	47	71	105	147	100	100	0	2007	2092	290	13	107	107	145	131	90	100	100	0	0.583	0.565	0.585	0.547	1.323	0.459	0.696	80	567	100	3008	3106	-0.778	1108	1900	1121	1985	93437
14	7	4	Hs~Ref:NM_002927.3~uORF:IOH11040~RFU:30173.92	HA20457~B14R04C07	8380	16840	110	1155	1138	382	33	47	47	48	6	12	100	100	0	899	885	65	7	96	96	98	17	17	100	100	0	1.380	1.383	1.311	1.305	1.418	1.510	0.804	80	569	100	1911	1880	0.464	1108	803	1091	789	91020
4	9	4	Hs~MGC:NM_152266.1~uORF:IOH13579~RFU:48245.63	HA20457~B04R04C09	17800	3330	110	1153	1162	481	41	51	51	186	287	154	97	83	0	951	925	97	10	132	132	1682	7894	469	0	0	0	1.346	1.401	1.294	1.281	1.470	2.308	0.494	80	614	100	1921	1904	0.428	1102	819	1111	793	92953
2	21	22	AlexaAntiMouseAb~N/A	HA20457~B02R22C21	11170	6960	110	1152	1238	562	45	47	47	51	29	56	100	100	0	6325	6219	1058	17	139	139	165	79	47	100	100	0	0.179	0.196	0.189	0.178	1.575	0.189	0.780	80	580	100	7291	7271	-2.485	1105	6186	1191	6080	99024
11	8	5	Hs~Ref:NM_005030.2~uORF:IOH5070~RFU:31524.02	HA20457~B11R05C08	13070	12490	110	1152	1208	509	42	51	51	177	211	119	98	90	0	1179	1178	49	4	129	129	214	160	74	100	100	0	1.049	1.103	1.100	0.979	1.688	1.366	0.603	80	565	100	2151	2206	0.068	1101	1050	1157	1049	96649
44	22	13	Hs~MGC:BC004921.1~uORF:IOH5220~RFU:21392.3	HA20457~B44R13C22	20640	50050	110	1151	1182	436	36	47	47	64	119	185	100	100	0	941	949	123	12	120	120	137	66	48	100	100	0	1.345	1.369	1.353	1.271	1.492	1.745	0.671	80	602	100	1925	1964	0.427	1104	821	1135	829	94536
42	4	17	Hs~Ref:NM_004635.2~uORF:IOH3889~RFU:21569.01	HA20457~B42R17C04	8010	50930	110	1150	1309	677	51	53	53	114	148	129	98	97	0	1024	1022	60	5	314	314	287	172	59	100	100	0	1.545	1.774	1.529	1.529	1.710	1.992	0.591	80	537	100	1807	1964	0.628	1097	710	1256	708	104711
46	19	20	Hs~Ref:NM_013370.2~uORF:IOH36682~RFU:24233.63	HA20457~B46R20C19	11050	56050	110	1150	1231	481	39	49	49	76	66	86	100	100	0	778	781	47	6	248	248	265	84	31	100	100	0	2.077	2.218	2.092	2.017	1.607	2.717	0.696	80	566	100	1631	1715	1.055	1101	530	1182	533	98467
42	17	3	Hs~Ref:XM_086879.4~uORF:IOH43381~RFU:40152.53	HA20457~B42R03C17	10590	48120	110	1150	1227	433	35	47	47	66	81	122	100	100	0	1064	1066	102	9	147	147	182	119	65	100	100	0	1.203	1.284	1.180	1.208	1.447	1.421	0.745	80	580	100	2020	2099	0.266	1103	917	1180	919	98122
19	21	17	Hs~Ref:NM_006223.1~uORF:IOH7192~RFU:18084.08	HA20457~B19R17C21	15800	23900	110	1150	1119	394	35	96	96	178	184	103	100	98	0	794	823	79	9	186	186	193	45	23	100	100	0	1.734	1.606	1.528	1.493	1.509	1.790	0.707	80	580	100	1662	1660	0.794	1054	608	1023	637	89502
16	2	9	Hs~Ref:NM_003524.2~uORF:IOH58715~RFU:17400.66	HA20457~B16R09C02	16480	17820	110	1149	1299	638	49	49	49	94	162	172	98	98	0	1474	1445	184	12	92	92	140	142	101	100	100	0	0.796	0.924	0.846	0.817	1.693	1.050	0.683	80	558	100	2482	2603	-0.329	1100	1382	1250	1353	103881
24	17	12	Hs~Ref:NM_207356.1~uORF:IOH40044~RFU:44377.73	HA20457~B24R12C17	19490	27400	110	1149	1277	571	44	50	50	133	155	116	100	100	0	938	897	96	10	131	131	199	119	59	100	100	0	1.362	1.602	1.392	1.487	1.565	2.154	0.588	80	566	100	1906	1993	0.446	1099	807	1227	766	102142
47	3	21	Hs~MGC:BC016944.1~uORF:IOH10312~RFU:3904.39	HA20457~B47R21C03	12390	56230	110	1149	1150	429	37	48	48	57	34	59	100	100	0	990	955	185	19	200	200	203	32	15	100	100	0	1.394	1.460	1.334	1.377	1.515	1.632	0.801	80	556	100	1891	1857	0.479	1101	790	1102	755	91967
42	14	17	Hs~Ref:NM_175055.2~uORF:IOH35043~RFU:6486.9	HA20457~B42R17C14	10000	50920	110	1149	1101	342	31	49	49	65	92	141	100	100	0	1236	1214	127	10	186	186	188	40	21	100	100	0	1.048	1.023	0.988	0.977	1.338	1.073	0.840	80	548	100	2150	2080	0.067	1100	1050	1052	1028	88105
23	18	16	Hs~Ref:NM_000882.1~uORF:IOH29844~RFU:9939.96	HA20457~B23R16C18	15170	28230	110	1148	1311	531	40	48	48	51	25	49	100	100	0	252	238	49	20	124	124	154	86	55	70	8	0	8.594	11.079	10.251	11.500	2.065	19.688	0.078	80	536	100	1228	1377	3.103	1100	128	1263	114	104856
6	17	20	Hs~Ref:NM_017798.2~uORF:IOH25880~RFU:13995.63	HA20457~B06R20C17	10380	11040	110	1148	1233	462	37	47	47	53	34	64	100	100	0	1071	1082	113	10	103	103	109	23	21	100	100	0	1.137	1.211	1.209	1.131	1.520	1.396	0.753	80	556	100	2069	2165	0.186	1101	968	1186	979	98602
46	8	15	Hs~MGC:BC057767.1~uORF:IOH29267~RFU:22094.49	HA20457~B46R15C08	8830	55060	110	1148	1003	419	41	47	47	51	25	49	98	98	0	1005	1008	63	6	230	230	235	29	12	100	100	0	1.421	1.229	1.358	1.005	2.411	1.461	0.706	80	556	100	1876	1734	0.507	1101	775	956	778	80216
8	16	19	Hs~Ref:NM_020168.3~uORF:IOH20961~RFU:14346.07	HA20457~B08R19C16	19180	10770	110	1147	1191	432	36	47	47	54	44	81	100	97	0	1214	1194	114	9	101	101	106	26	24	100	100	0	0.988	1.047	0.986	0.958	1.660	1.196	0.748	80	547	100	2213	2237	-0.017	1100	1113	1144	1093	95271
1	21	22	AlexaAntiMouseAb~N/A	HA20457~B01R22C21	6670	6960	110	1147	1190	419	35	48	48	64	66	103	100	100	0	6979	6551	1164	17	167	167	191	82	42	100	100	0	0.161	0.179	0.165	0.171	1.524	0.168	0.767	80	599	100	7911	7526	-2.632	1099	6812	1142	6384	95203
46	3	12	Hs~Ref:NM_007217.2~uORF:IOH3934~RFU:48836.24	HA20457~B46R12C03	7830	54460	110	1146	1287	931	72	48	48	76	81	106	100	100	0	734	752	91	12	232	232	244	70	28	100	100	0	2.187	2.383	2.099	2.124	1.583	5.095	0.386	80	601	100	1600	1759	1.129	1098	502	1239	520	102926
8	4	16	Hs~Ref:NM_002314.2~CAT:PV4337~RFU:241.27	HA20457~B08R16C04	16780	10180	110	1146	1214	509	41	47	47	55	42	76	100	100	0	803	817	63	7	92	92	104	32	30	100	100	0	1.546	1.610	1.438	1.467	1.534	2.007	0.688	80	557	100	1810	1892	0.628	1099	711	1167	725	97115
43	11	18	Hs~MGC:BC032822.2~uORF:IOH26849~RFU:4485.81	HA20457~B43R18C11	13900	51140	110	1145	1345	444	33	48	48	57	46	80	100	100	0	1157	1112	187	16	135	135	158	54	34	100	100	0	1.073	1.328	1.162	1.279	1.430	1.486	0.767	80	535	100	2119	2274	0.102	1097	1022	1297	977	107570
40	10	19	Hs~Ref:NM_007250.2~uORF:IOH43163~RFU:11595.98	HA20457~B40R19C10	18200	46840	110	1145	1193	371	31	47	47	51	43	84	100	100	0	1107	1077	140	12	143	143	149	34	22	100	100	0	1.139	1.227	1.190	1.176	1.367	1.354	0.803	80	558	100	2062	2080	0.188	1098	964	1146	934	95464
42	7	4	Hs~MGC:BC029378.1~uORF:IOH23186~RFU:32323.29	HA20457~B42R04C07	8570	48350	110	1145	1133	439	38	112	112	216	231	106	96	88	0	1884	1899	168	8	355	355	323	162	50	100	100	0	0.676	0.661	0.669	0.580	1.904	0.654	0.551	80	557	100	2562	2565	-0.566	1033	1529	1021	1544	90655
28	22	22	AlexaAntiMouseAb~N/A	HA20457~B28R22C22	20520	33880	110	1145	1074	467	43	47	47	48	7	14	98	98	0	6275	5718	1506	26	83	83	93	43	46	100	100	0	0.177	0.182	0.185	0.151	2.472	0.182	0.817	80	612	100	7290	6662	-2.496	1098	6192	1027	5635	85918
26	14	17	Hs~MGC:BC021187.1~uORF:IOH10893~RFU:18476.56	HA20457~B26R17C14	9930	32970	110	1143	1250	444	35	48	48	61	57	93	100	100	0	1682	1635	146	8	122	122	146	100	68	100	100	0	0.702	0.794	0.761	0.741	1.443	0.768	0.741	80	564	100	2655	2715	-0.511	1095	1560	1202	1513	99996
45	19	22	ERa~N/A	HA20457~B45R22C19	6500	56430	110	1143	1097	461	42	51	51	188	195	103	98	95	0	1299	1283	88	6	213	213	294	138	46	100	100	0	1.006	0.978	0.977	0.870	1.704	1.102	0.644	80	590	100	2178	2116	0.008	1092	1086	1046	1070	87741
15	6	13	Hs~Ref:NM_134323.1~uORF:IOH6090~RFU:12347.16	HA20457~B15R13C06	12770	18600	110	1142	1064	296	27	49	49	86	105	122	100	100	0	1666	1647	157	9	127	127	162	115	70	100	100	0	0.710	0.668	0.697	0.640	1.443	0.672	0.697	80	552	100	2632	2535	-0.494	1093	1539	1015	1520	85124
10	14	3	Hs~Ref:XM_378350.2~uORF:IOH43457~RFU:50158.11	HA20457~B10R03C14	9770	12130	110	1141	1149	586	51	50	50	87	88	101	100	96	0	829	863	83	9	151	151	179	109	60	100	100	0	1.609	1.544	1.574	1.303	2.025	1.817	0.471	80	557	100	1769	1811	0.686	1091	678	1099	712	91936
16	11	16	Hs~Ref:NM_003980.3~uORF:IOH55674~RFU:21917.03	HA20457~B16R16C11	18290	19220	110	1140	2824	4215	149	51	51	90	123	136	98	97	0	1584	1478	362	24	123	123	125	18	14	100	100	0	0.745	2.046	0.702	1.149	3.676	16.483	0.053	80	567	100	2550	4128	-0.424	1089	1461	2773	1355	225907
47	9	5	Hs~MGC:BC019598.1~uORF:IOH10613~RFU:4133.19	HA20457~B47R05C09	13560	53010	110	1140	1187	450	37	45	45	46	13	28	100	100	0	921	899	128	14	154	154	157	17	10	100	100	0	1.428	1.533	1.450	1.440	1.444	1.749	0.812	80	568	100	1862	1887	0.514	1095	767	1142	745	94972
24	20	9	Hs~Ref:NM_014077.1~uORF:IOH4219~RFU:19437.77	HA20457~B24R09C20	20090	26810	110	1139	1223	408	33	48	48	49	16	32	100	100	0	906	920	123	13	79	79	80	12	15	100	100	0	1.319	1.397	1.363	1.330	1.429	1.523	0.810	80	577	100	1918	2016	0.400	1091	827	1175	841	97846
43	1	22	ERa~N/A	HA20457~B43R22C01	11920	51900	110	1139	1193	471	39	49	49	103	133	129	100	100	0	1215	1249	176	14	247	247	294	127	43	100	100	0	1.126	1.142	1.130	1.057	1.568	1.356	0.683	80	590	100	2058	2146	0.171	1090	968	1144	1002	95423
39	16	13	Hs~Ref:NM_004178.3~uORF:IOH45867~RFU:8966.7	HA20457~B39R13C16	14870	45640	110	1138	1240	574	46	50	50	148	187	126	100	100	0	1960	1918	272	14	151	151	204	100	49	100	100	0	0.601	0.673	0.611	0.616	1.678	0.714	0.601	80	569	100	2897	2957	-0.734	1088	1809	1190	1767	99188
48	20	20	Hs~Ref:NM_078480.1~uORF:IOH41165~RFU:25391.92	HA20457~B48R20C20	20310	56030	110	1136	1266	496	39	185	185	304	311	102	97	87	0	578	581	40	6	288	288	289	64	22	100	100	0	3.279	3.689	3.137	3.321	1.679	6.517	0.350	80	559	100	1241	1374	1.713	951	290	1081	293	101260
47	9	16	Hs~Ref:NM_173822.1~uORF:IOH27491~RFU:34453.06	HA20457~B47R16C09	13590	55220	110	1136	1209	444	36	47	47	128	378	295	100	82	0	797	831	117	14	174	174	215	138	64	100	100	0	1.748	1.769	1.753	1.661	1.564	2.366	0.623	80	583	100	1712	1819	0.806	1089	623	1162	657	96758
17	18	14	Hs~Ref:NM_003939.2~uORF:IOH42069~RFU:12914.85	HA20457~B17R14C18	6120	23370	110	1136	1186	416	35	48	48	60	49	81	100	100	0	944	915	100	10	109	109	126	36	28	100	100	0	1.303	1.412	1.417	1.331	1.436	1.554	0.792	80	578	100	1923	1944	0.382	1088	835	1138	806	94848
17	8	10	Hs~MGC:BC011878.2~uORF:IOH13403~RFU:7322.05	HA20457~B17R10C08	4120	22570	110	1136	1125	381	33	48	48	49	11	22	100	100	0	1054	1004	180	17	99	99	100	11	11	100	100	0	1.139	1.190	1.226	1.113	1.480	1.275	0.834	80	536	100	2043	1982	0.188	1088	955	1077	905	89965
26	6	16	Hs~Ref:NM_006274.2~CAT_PHC1244~RFU:98.25	HA20457~B26R16C06	8320	32770	110	1136	1108	449	40	47	47	54	79	146	100	98	0	537	534	36	6	157	157	206	102	49	100	100	0	2.866	2.814	3.032	2.480	1.771	3.539	0.701	80	598	100	1469	1438	1.519	1089	380	1061	377	88671
1	7	12	Hs~MGC:BC023569.1~uORF:IOH27860~RFU:28616.07	HA20457~B01R12C07	3850	4980	110	1135	1249	544	43	49	49	130	207	159	100	95	0	1965	2524	2046	81	147	147	226	174	76	100	100	0	0.597	0.505	0.600	0.519	1.676	0.336	0.455	80	546	100	2904	3577	-0.743	1086	1818	1200	2377	99930
31	14	12	Hs~MGC:BC000712.1~uORF:IOH4703~RFU:41630.39	HA20457~B31R12C14	14410	36420	110	1135	1183	400	33	47	47	64	77	120	100	100	0	1575	2444	2204	90	287	287	353	189	53	100	100	0	0.845	0.527	0.722	0.634	1.927	0.221	0.295	80	569	100	2376	3293	-0.243	1088	1288	1136	2157	94611
35	13	6	Hs~Ref:NM_002822.3~uORF:IOH40883~RFU:31011.9	HA20457~B35R06C13	14240	39700	110	1135	1029	337	32	47	47	63	75	119	100	100	0	1588	1633	155	9	114	114	133	58	43	100	100	0	0.738	0.646	0.703	0.601	1.568	0.639	0.749	80	569	100	2562	2501	-0.438	1088	1474	982	1519	82317
37	19	19	Hs~Ref:NM_014412.2~uORF:IOH7484~RFU:27726	HA20457~B37R19C19	6490	46890	110	1133	1297	786	60	56	56	166	212	127	100	83	0	690	676	38	5	183	183	199	56	28	100	100	0	2.124	2.517	2.179	2.057	1.877	3.476	0.523	80	560	100	1584	1734	1.087	1077	507	1241	493	103743
16	21	8	Hs~Ref:NM_032485.4~uORF:IOH36748~RFU:5497.58	HA20457~B16R08C21	20280	17600	110	1133	1210	392	32	47	47	50	30	60	100	100	0	1054	998	172	17	87	87	89	15	16	100	100	0	1.123	1.277	1.226	1.227	1.475	1.377	0.817	80	569	100	2053	2074	0.167	1086	967	1163	911	96811
20	20	20	Hs~MGC:BC027322.1~uORF:IOH10880~RFU:4340.61	HA20457~B20R20C20	20060	24470	110	1133	1200	396	33	49	49	56	37	66	100	100	0	700	697	118	16	99	99	102	23	22	98	98	0	1.804	1.925	1.802	1.900	1.778	2.340	0.594	80	565	100	1685	1749	0.851	1084	601	1151	598	95997
12	6	17	Hs~MGC:BC010947.1~uORF:IOH14455~RFU:5242.36	HA20457~B12R17C06	17220	14900	110	1133	1156	589	50	48	48	255	616	241	80	31	0	886	839	186	22	93	93	226	1172	518	0	0	0	1.368	1.485	1.338	1.276	1.931	0.106	0.018	80	544	100	1878	1854	0.452	1085	793	1108	746	92516
39	22	12	Hs~Ref:NM_198216.1~uORF:IOH44674~RFU:38366.82	HA20457~B39R12C22	16070	45420	110	1132	1114	387	34	50	50	161	220	136	100	90	0	1017	1046	121	11	228	228	255	82	32	100	100	0	1.371	1.301	1.467	1.203	1.676	1.477	0.657	80	618	100	1871	1882	0.456	1082	789	1064	818	89080
25	20	6	Hs~MGC:BC021983.1~uORF:IOH27884~RFU:19235.49	HA20457~B25R06C20	6580	30750	110	1131	1138	559	49	47	47	49	15	30	100	100	0	1643	1549	370	23	106	106	111	27	24	100	100	0	0.705	0.756	0.655	0.657	1.950	0.806	0.566	80	575	100	2621	2534	-0.504	1084	1537	1091	1443	91001
4	1	5	Hs~Ref:NM_206909.1~uORF:IOH43255~RFU:13256.55	HA20457~B04R05C01	16190	3510	110	1130	1097	371	33	47	47	49	17	34	100	100	0	799	791	62	7	101	101	106	22	20	100	100	0	1.552	1.522	1.554	1.401	1.601	1.776	0.654	80	589	100	1781	1740	0.634	1083	698	1050	690	87735
10	1	4	Hs~Ref:NM_031472.1~uORF:IOH5640~RFU:32723.21	HA20457~B10R04C01	7180	12320	110	1129	1175	455	38	87	87	174	176	101	100	98	0	596	607	56	9	307	307	323	157	48	100	23	0	3.606	3.627	3.566	3.383	1.608	4.204	0.481	80	600	100	1331	1388	1.850	1042	289	1088	300	93968
2	16	16	Hs~Ref:NM_015929.2~uORF:IOH7138~RFU:13579.69	HA20457~B02R16C16	10160	5760	110	1129	1135	503	44	48	48	54	30	55	100	100	0	1115	1113	95	8	107	107	117	39	33	100	100	0	1.072	1.081	1.017	0.935	1.803	1.253	0.647	80	568	100	2089	2093	0.101	1081	1008	1087	1006	90760
23	1	10	Hs~Ref:NM_005663.2~uORF:IOH46152~RFU:49613.54	HA20457~B23R10C01	11740	27030	110	1128	1236	531	42	50	50	213	350	164	100	87	0	1291	1527	735	48	134	134	263	253	96	100	100	0	0.932	0.851	0.874	0.839	1.856	0.809	0.411	80	608	100	2235	2579	-0.102	1078	1157	1186	1393	98895
12	11	12	Hs~Ref:NM_021038.3~uORF:IOH26398~RFU:6287.12	HA20457~B12R12C11	18230	13900	110	1128	1171	412	35	47	47	47	3	6	100	100	0	824	785	132	16	91	91	92	20	21	100	100	0	1.475	1.620	1.654	1.541	1.540	1.859	0.758	80	577	100	1814	1818	0.560	1081	733	1124	694	93675
40	9	19	Hs~Ref:NM_007250.2~uORF:IOH43163~RFU:11294.64	HA20457~B40R19C09	18010	46850	110	1127	1222	420	34	47	47	50	36	72	100	100	0	1088	1048	103	9	144	144	151	38	25	100	100	0	1.144	1.300	1.236	1.226	1.468	1.499	0.750	80	567	100	2024	2079	0.194	1080	944	1175	904	97737
6	19	19	Hs~MGC:BC028120.1~uORF:IOH11613~RFU:8102.62	HA20457~B06R19C19	10780	10850	110	1127	1093	330	30	47	47	58	73	125	100	100	0	1183	1169	141	12	94	94	102	50	49	100	100	0	0.992	0.973	0.943	0.929	1.484	1.080	0.747	80	557	100	2169	2121	-0.012	1080	1089	1046	1075	87429
39	20	12	Hs~Ref:NM_080918.1~uORF:IOH44424~RFU:4123.88	HA20457~B39R12C20	15660	45420	110	1127	1087	600	55	48	48	179	294	164	88	73	0	362	364	69	18	131	131	164	72	43	100	93	0	4.671	4.459	4.222	3.414	2.269	5.880	0.666	80	557	100	1310	1272	2.224	1079	231	1039	233	86976
28	21	22	AlexaAntiMouseAb~N/A	HA20457~B28R22C21	20320	33880	110	1127	1073	506	47	47	47	53	57	107	96	96	0	6316	5581	1612	28	88	88	106	51	48	100	100	0	0.173	0.187	0.190	0.162	2.065	0.188	0.820	80	580	100	7308	6519	-2.528	1080	6228	1026	5493	85843
47	10	16	Hs~Ref:NM_173822.1~uORF:IOH27491~RFU:31237.99	HA20457~B47R16C10	13790	55210	110	1126	1335	605	45	46	46	60	63	105	100	100	0	806	828	91	10	167	167	189	100	52	100	100	0	1.690	1.950	1.728	1.792	1.490	2.387	0.615	80	568	100	1719	1950	0.757	1080	639	1289	661	106774
23	6	9	Hs~Ref:NM_001722.2~uORF:IOH4103~RFU:9278.38	HA20457~B23R09C06	12750	26830	110	1126	1181	507	42	49	49	55	30	54	100	100	0	707	685	115	16	122	122	126	20	15	100	100	0	1.841	2.011	1.921	1.842	1.483	2.330	0.768	80	567	100	1662	1695	0.881	1077	585	1132	563	94451
16	16	13	Hs~MGC:BC002424.1~uORF:IOH4157~RFU:16978.24	HA20457~B16R13C16	19280	18610	110	1125	1121	419	37	47	47	48	12	25	100	100	0	796	757	100	13	78	78	80	13	16	100	100	0	1.501	1.582	1.522	1.486	1.431	1.908	0.721	80	578	100	1796	1753	0.586	1078	718	1074	679	89699
21	7	18	Hs~MGC:BC041366.2~uORF:IOH27747~RFU:32158.3	HA20457~B21R18C07	3990	28650	110	1124	1228	420	34	48	48	58	59	101	100	100	0	888	892	77	8	133	133	141	38	26	100	100	0	1.425	1.555	1.401	1.452	1.492	1.662	0.765	80	582	100	1831	1939	0.511	1076	755	1180	759	98229
13	22	13	Hs~MGC:BC008623.1~uORF:IOH3309~RFU:17731.44	HA20457~B13R13C22	6940	18660	110	1123	1160	305	26	49	49	61	50	81	100	100	0	2245	2554	1267	49	114	114	120	27	22	100	100	0	0.504	0.455	0.495	0.466	1.504	0.358	0.639	80	580	100	3205	3551	-0.989	1074	2131	1111	2440	92821
47	22	4	Hs~Ref:NM_005659.1~uORF:IOH4744~RFU:39523.81	HA20457~B47R04C22	16160	52810	110	1122	1252	544	43	48	48	189	336	177	97	86	0	1022	1033	98	9	162	162	289	253	87	100	100	0	1.249	1.382	1.335	1.251	1.610	1.835	0.609	80	570	100	1934	2075	0.321	1074	860	1204	871	100187
34	21	15	Hs~Ref:NM_002093.2~CAT:PV3365~RFU:420.39	HA20457~B34R15C21	11330	41550	110	1121	1275	525	41	47	47	48	9	18	100	100	0	715	673	155	23	116	116	123	24	19	100	100	0	1.793	2.205	2.206	2.128	1.617	2.508	0.797	80	574	100	1673	1785	0.842	1074	599	1228	557	102003
37	22	9	Hs~Ref:NM_004728.2~uORF:IOH46173~RFU:11502.18	HA20457~B37R09C22	7070	44860	110	1121	1183	442	37	48	48	68	94	138	100	100	0	1399	1332	191	14	151	151	169	48	28	100	100	0	0.860	0.961	0.993	0.894	1.522	1.082	0.775	80	579	100	2321	2316	-0.218	1073	1248	1135	1181	94661
45	15	14	Hs~Ref:NM_004936.2~uORF:IOH12785~RFU:27689.73	HA20457~B45R14C15	5690	54840	110	1121	1174	480	40	47	47	58	39	67	100	100	0	540	536	52	9	225	225	224	37	16	100	100	0	3.410	3.624	3.421	3.313	1.520	4.395	0.745	80	568	100	1389	1438	1.770	1074	315	1127	311	93899
9	19	18	Hs~MGC:BC017702.1~uORF:IOH11854~RFU:7872.27	HA20457~B09R18C19	6320	15120	110	1120	1184	586	49	47	47	56	50	89	100	97	0	454	444	64	14	97	97	101	26	25	100	100	0	3.006	3.277	3.371	2.837	1.816	4.385	0.692	80	568	100	1430	1484	1.588	1073	357	1137	347	94691
8	3	10	Hs~Ref:NM_024316.1~uORF:IOH12150~RFU:57124.45	HA20457~B08R10C03	16570	8980	110	1119	1143	359	31	107	107	248	260	104	98	96	0	1607	1614	120	7	301	301	413	320	77	100	100	0	0.775	0.789	0.762	0.743	1.429	0.808	0.647	80	566	100	2318	2349	-0.368	1012	1306	1036	1313	91460
8	16	14	Hs~MGC:BC045167.2~uORF:IOH25851~RFU:28097.16	HA20457~B08R14C16	19180	9770	110	1119	1133	448	39	46	46	60	53	88	100	100	0	555	541	73	13	112	112	133	55	41	100	100	0	2.422	2.534	2.562	2.312	1.680	3.125	0.698	80	559	100	1516	1516	1.276	1073	443	1087	429	90665
22	22	15	Hs~N/A:NM_006206.3~CAT:PV3847~RFU:9584.26	HA20457~B22R15C22	11440	28010	110	1118	1210	621	51	51	51	242	567	234	82	47	0	254	244	31	12	104	104	111	27	24	100	100	0	7.113	8.279	7.378	6.746	2.339	11.095	0.664	80	558	100	1217	1299	2.831	1067	150	1159	140	96787
20	3	4	Hs~Ref:NM_006007.1~uORF:IOH14289~RFU:36147.38	HA20457~B20R04C03	16640	21290	110	1116	1296	543	41	54	54	113	113	100	100	100	0	709	691	69	9	150	150	161	71	44	100	100	0	1.900	2.296	2.061	2.124	1.520	2.732	0.665	80	557	100	1621	1783	0.926	1062	559	1242	541	103704
8	2	5	Hs~Ref:NM_015833.1~uORF:IOH38242~RFU:18504.37	HA20457~B08R05C02	16350	7980	110	1116	1140	352	30	50	50	193	253	131	98	95	0	2187	2155	177	8	128	128	298	334	112	100	100	0	0.518	0.538	0.518	0.505	1.470	0.512	0.664	80	584	100	3125	3117	-0.950	1066	2059	1090	2027	91223
20	10	16	Hs~Ref:NM_175072.1~uORF:IOH59828~RFU:39942.14	HA20457~B20R16C10	18050	23680	110	1116	1109	392	35	51	51	176	285	161	97	88	0	1283	1306	80	6	96	96	218	259	118	100	100	0	0.897	0.874	0.922	0.806	1.533	0.980	0.714	80	575	100	2252	2268	-0.156	1065	1187	1058	1210	88697
10	15	4	Hs~MGC:BC004259.1~uORF:IOH5453~RFU:18709.61	HA20457~B10R04C15	9970	12320	110	1115	1088	363	33	50	50	70	72	102	100	100	0	858	839	64	7	153	153	158	33	20	100	100	0	1.511	1.513	1.517	1.397	1.633	1.908	0.607	80	558	100	1770	1724	0.595	1065	705	1038	686	87074
24	22	15	Hs~Ref:NM_000222.1~CAT:PV4132~RFU:358.08	HA20457~B24R15C22	20490	28010	110	1114	1211	434	35	47	47	47	3	6	100	100	0	926	905	139	15	83	83	83	9	10	100	100	0	1.266	1.416	1.379	1.347	1.415	1.531	0.779	80	588	100	1910	1986	0.340	1067	843	1164	822	96903
7	13	15	Hs~Ref:NM_002742.1~CAT:PV3791~RFU:12122.4	HA20457~B07R15C13	14120	10020	110	1114	1128	472	41	46	46	48	14	29	100	100	0	326	316	67	21	91	91	94	14	14	100	97	0	4.545	4.809	4.637	4.671	1.678	5.613	0.769	80	560	100	1303	1307	2.184	1068	235	1082	225	90215
8	1	6	Hs~Ref:NM_005307.1~N/A~RFU:17574.4	HA20457~B08R06C01	16160	8180	110	1113	1111	300	27	56	56	287	361	125	98	88	0	1186	1205	159	13	174	174	327	328	100	100	100	0	1.044	1.023	1.014	0.983	1.426	1.091	0.610	80	589	100	2069	2086	0.063	1057	1012	1055	1031	88901
28	3	17	Hs~Ref:NM_138394.2~uORF:IOH14812~RFU:5181.36	HA20457~B28R17C03	16720	32900	110	1113	1041	527	50	47	47	54	46	85	98	98	0	369	374	111	29	92	92	95	16	16	100	100	0	3.848	3.525	3.648	3.031	2.034	4.520	0.654	80	556	100	1343	1276	1.944	1066	277	994	282	83272
16	12	5	Hs~Ref:NM_001626.2~N/A~RFU:8207.42	HA20457~B16R05C12	18460	17020	110	1113	976	389	39	48	48	53	26	49	100	100	0	333	318	52	16	90	90	108	56	51	100	100	0	4.383	4.070	3.826	3.683	1.647	4.749	0.782	80	556	100	1308	1156	2.132	1065	243	928	228	78045
26	16	17	Hs~Ref:NM_001412.2~uORF:IOH3055~RFU:6077.51	HA20457~B26R17C16	10330	32960	110	1112	1291	508	39	48	48	70	83	118	100	100	0	2622	2545	196	7	118	118	173	184	106	100	100	0	0.425	0.512	0.427	0.476	1.465	0.536	0.716	80	567	100	3568	3670	-1.235	1064	2504	1243	2427	103311
16	15	7	Hs~MGC:BC009825.2~uORF:IOH14857~RFU:8371.18	HA20457~B16R07C15	19070	17410	110	1112	1198	549	45	48	48	770	1723	223	20	0	0	307	305	45	14	83	83	96	34	35	100	100	0	4.750	5.180	4.871	4.653	1.720	73.339	0.080	80	558	100	1288	1372	2.248	1064	224	1150	222	95830
48	18	6	Hs~Ref:NM_025104.2~uORF:IOH59472~RFU:36282.55	HA20457~B48R06C18	19890	53220	110	1112	1173	456	38	50	50	82	81	98	100	100	0	1016	1012	139	13	176	176	174	57	32	100	100	0	1.264	1.343	1.367	1.234	1.679	1.579	0.635	80	569	100	1902	1959	0.338	1062	840	1123	836	93816
26	19	17	Hs~Ref:NM_031845.1~uORF:IOH37776~RFU:25743.12	HA20457~B26R17C19	10930	32960	110	1112	1138	278	24	48	48	61	71	116	100	100	0	1794	1784	151	8	113	113	149	118	79	100	100	0	0.633	0.652	0.663	0.631	1.320	0.665	0.781	80	576	100	2745	2761	-0.660	1064	1681	1090	1671	91057
20	17	15	Hs~Ref:NM_031417.1~CAT:PV3851~RFU:6718.75	HA20457~B20R15C17	19460	23480	110	1111	1199	538	44	48	48	49	6	12	100	100	0	608	599	90	15	76	76	82	26	31	100	100	0	1.998	2.201	1.942	1.992	1.625	2.864	0.697	80	576	100	1595	1674	0.999	1063	532	1151	523	95930
14	10	3	Hs~Ref:NM_198467.1~uORF:IOH40427~RFU:3742.36	HA20457~B14R03C10	8970	16630	110	1111	1149	464	40	48	48	89	177	198	98	96	0	699	660	167	25	118	118	150	97	64	98	93	0	1.830	2.031	2.033	1.968	1.766	2.406	0.728	80	548	100	1644	1643	0.872	1063	581	1101	542	91888
47	3	9	Hs~MGC:BC034821.1~uORF:IOH22860~RFU:5343.89	HA20457~B47R09C03	12370	53810	110	1111	1088	416	38	298	298	3427	6869	200	0	0	0	329	324	29	8	201	201	224	70	31	95	31	0	6.352	6.423	6.712	5.713	2.112	83.818	0.156	80	566	100	941	913	2.667	813	128	790	123	87007
15	11	2	Hs~Ref:NM_002391.1~uORF:IOH13794~RFU:20061.38	HA20457~B15R02C11	13750	16400	110	1110	1082	417	38	47	47	51	26	50	100	100	0	1074	1072	45	4	96	96	100	24	24	100	100	0	1.087	1.060	1.069	0.976	1.527	1.133	0.761	80	562	100	2041	2011	0.120	1063	978	1035	976	86527
21	17	6	Hs~Ref:NM_006306.2~uORF:IOH44953~RFU:9134.11	HA20457~B21R06C17	5980	26240	110	1109	1227	392	31	48	48	49	15	30	100	100	0	943	933	83	8	113	113	118	22	18	100	100	0	1.278	1.438	1.258	1.367	1.447	1.602	0.747	80	554	100	1891	1999	0.354	1061	830	1179	820	98125
4	18	20	Hs~Ref:XM_378660.1~uORF:IOH44637~RFU:32628.82	HA20457~B04R20C18	19600	6520	110	1109	1215	551	45	101	101	334	436	130	96	57	0	2117	2030	328	16	332	332	579	554	95	100	92	0	0.565	0.656	0.631	0.588	1.583	0.870	0.507	80	547	100	2793	2812	-0.824	1008	1785	1114	1698	97218
26	3	9	Hs~Ref:NM_006205.1~uORF:IOH40356~RFU:11590.61	HA20457~B26R09C03	7720	31370	110	1109	1119	482	43	48	48	53	40	75	100	100	0	2296	2263	147	6	118	118	129	78	60	100	100	0	0.487	0.499	0.504	0.443	1.703	0.483	0.702	80	585	100	3239	3216	-1.038	1061	2178	1071	2145	89483
26	5	10	Hs~MGC:BC052813.1~uORF:IOH29045~RFU:14959.61	HA20457~B26R10C05	8110	31570	110	1109	1068	349	32	48	48	49	31	63	100	100	0	1259	1256	76	6	135	135	152	45	29	100	100	0	0.944	0.910	0.927	0.859	1.431	0.981	0.791	80	584	100	2185	2141	-0.083	1061	1124	1020	1121	85451
4	15	6	Hs~MGC:BC022344.1~uORF:IOH14799~RFU:39955.24	HA20457~B04R06C15	18990	3700	110	1109	1040	357	34	49	49	77	105	136	100	100	0	988	1007	143	14	159	159	197	93	47	100	100	0	1.279	1.169	1.111	1.096	1.538	1.220	0.691	80	566	100	1889	1839	0.355	1060	829	991	848	83234
8	1	5	Hs~Ref:NM_015833.1~uORF:IOH38242~RFU:17474.89	HA20457~B08R05C01	16150	7980	110	1109	1019	406	39	50	50	251	325	129	91	78	0	2429	2361	268	11	151	151	302	284	94	100	100	0	0.465	0.438	0.459	0.381	1.916	0.430	0.539	80	590	100	3337	3179	-1.105	1059	2278	969	2210	81559
37	4	3	Hs~Ref:NM_033671.1~uORF:IOH43039~RFU:60895.65	HA20457~B37R03C04	3450	43680	110	1108	1152	410	35	48	48	242	349	144	100	83	0	1858	1878	179	9	150	150	510	505	99	100	100	0	0.621	0.639	0.580	0.598	1.457	0.704	0.554	80	548	100	2768	2832	-0.688	1060	1708	1104	1728	92181
17	19	13	Hs~Ref:NM_005240.1~uORF:IOH13301~RFU:4995.63	HA20457~B17R13C19	6320	23170	110	1107	1141	582	51	48	48	48	10	20	100	100	0	921	896	176	19	105	105	110	24	21	100	100	0	1.298	1.382	1.324	1.193	1.950	1.717	0.693	80	593	100	1875	1884	0.376	1059	816	1093	791	91254
46	22	9	Hs~MGC:BC000953.2~uORF:IOH3022~RFU:4115.72	HA20457~B46R09C22	11640	53840	110	1106	1182	357	30	46	46	47	22	46	100	100	0	1025	967	214	22	177	177	178	17	9	100	100	0	1.250	1.438	1.350	1.433	1.549	1.529	0.778	80	590	100	1908	1926	0.322	1060	848	1136	790	94539
32	17	19	Hs~MGC:BC070154.1~uORF:IOH63011~RFU:12622.77	HA20457~B32R19C17	19550	37770	110	1106	1174	582	49	48	48	70	85	121	100	98	0	1022	1026	156	15	87	87	122	139	113	100	100	0	1.132	1.199	1.150	1.040	1.737	1.412	0.730	80	584	100	1993	2065	0.178	1058	935	1126	939	93880
12	10	20	Hs~MGC:BC007991.2~uORF:IOH6109~RFU:20163.76	HA20457~B12R20C10	18030	15500	110	1106	1125	350	31	51	51	87	91	104	100	98	0	559	538	105	19	109	109	131	65	49	97	93	0	2.344	2.503	2.417	2.576	1.961	2.891	0.681	80	582	100	1505	1503	1.229	1055	450	1074	429	89979
20	13	18	Hs~MGC:BC015505.1~uORF:IOH9981~RFU:39318.27	HA20457~B20R18C13	18660	24090	110	1106	1049	399	38	50	50	190	309	162	98	81	0	708	726	95	13	86	86	160	132	82	100	100	0	1.698	1.561	1.531	1.432	1.648	2.101	0.626	80	567	100	1678	1639	0.764	1056	622	999	640	83910
1	20	9	Hs~MGC:BC055314.1~uORF:IOH29446~RFU:47091.7	HA20457~B01R09C20	6450	4360	110	1104	1083	424	39	48	48	63	61	96	100	100	0	1363	1353	124	9	135	135	141	36	25	100	100	0	0.860	0.850	0.829	0.781	1.561	0.881	0.728	80	566	100	2284	2253	-0.218	1056	1228	1035	1218	86677
6	7	9	Hs~Ref:NM_170746.2~uORF:IOH58679~RFU:34546.13	HA20457~B06R09C07	8390	8840	110	1104	1041	498	47	47	47	67	78	116	98	98	0	873	865	89	10	134	134	164	68	41	100	100	0	1.430	1.360	1.427	1.099	2.206	1.808	0.670	80	600	100	1796	1725	0.516	1057	739	994	731	83260
8	4	10	Hs~Ref:NM_024316.1~uORF:IOH12150~RFU:50409.39	HA20457~B08R10C04	16770	8980	110	1102	1162	463	39	53	53	213	253	118	100	87	0	1661	1684	389	23	183	183	351	335	95	100	100	0	0.710	0.739	0.756	0.685	1.726	0.723	0.534	80	564	100	2527	2610	-0.495	1049	1478	1109	1501	92986
3	10	7	Hs~MGC:BC016312.1~uORF:IOH27887~RFU:11052.4	HA20457~B03R07C10	13430	3920	110	1102	1132	387	34	47	47	58	93	160	100	100	0	1214	1174	128	10	103	103	111	27	24	100	100	0	0.950	1.013	0.942	0.958	1.484	1.164	0.702	80	509	100	2166	2156	-0.075	1055	1111	1085	1071	90586
25	7	19	Hs~Ref:NM_006804.2~uORF:IOH27296~RFU:23230.35	HA20457~B25R19C07	4010	33360	110	1102	1074	384	35	47	47	47	3	6	100	100	0	603	612	71	11	118	118	119	13	10	100	100	0	2.175	2.079	2.118	1.930	1.518	2.369	0.651	80	574	100	1540	1521	1.121	1055	485	1027	494	85888
1	6	7	Hs~MGC:BC005955.1~uORF:IOH7485~RFU:7664.85	HA20457~B01R07C06	3650	3960	110	1101	1070	406	37	47	47	47	3	6	100	100	0	1452	1335	302	22	118	118	119	14	11	100	100	0	0.790	0.841	0.855	0.789	2.060	0.855	0.712	80	574	100	2388	2240	-0.340	1054	1334	1023	1217	85601
45	20	22	ERa~N/A	HA20457~B45R22C20	6700	56440	110	1100	1280	597	46	157	157	244	229	93	96	87	0	1379	1394	141	10	396	396	347	124	35	100	100	0	0.959	1.125	1.015	0.965	1.808	1.301	0.520	80	608	100	1926	2121	-0.060	943	983	1123	998	102401
31	19	20	Hs~MGC:BC056904.1~uORF:IOH29048~RFU:3931.22	HA20457~B31R20C19	15410	38030	110	1100	1208	470	38	46	46	48	17	35	100	100	0	909	863	184	21	133	133	134	12	8	100	100	0	1.358	1.592	1.497	1.509	1.742	1.911	0.676	80	567	100	1830	1892	0.442	1054	776	1162	730	96643
36	15	20	Hs~Ref:NM_178338.2~uORF:IOH50134~RFU:18110.26	HA20457~B36R20C15	19180	42460	110	1100	1130	442	39	46	46	48	17	35	100	100	0	1549	1494	216	14	103	103	106	20	18	100	100	0	0.729	0.779	0.778	0.726	1.630	0.822	0.711	80	540	100	2500	2475	-0.456	1054	1446	1084	1391	90436
29	9	14	Hs~Ref:NM_005870.3~uORF:IOH53845~RFU:22242.37	HA20457~B29R14C09	4470	36840	110	1098	1300	526	40	50	50	90	107	118	100	100	0	2045	2006	156	7	236	236	224	61	27	100	100	0	0.579	0.706	0.635	0.649	1.481	0.703	0.756	80	566	100	2857	3020	-0.788	1048	1809	1250	1770	103974
47	20	22	ERa~N/A	HA20457~B47R22C20	15780	56430	110	1098	1180	410	34	48	48	105	132	125	100	100	0	1279	1302	166	12	190	190	216	83	38	100	100	0	0.964	1.018	0.975	0.961	1.438	1.140	0.713	80	607	100	2139	2244	-0.053	1050	1089	1132	1112	94432
37	18	9	Hs~Ref:NM_080588.1~uORF:IOH46132~RFU:30294.76	HA20457~B37R09C18	6270	44860	110	1096	1185	575	48	52	52	135	194	143	100	88	0	906	890	71	7	216	216	283	143	50	100	100	0	1.513	1.681	1.557	1.458	1.753	2.275	0.529	80	567	100	1734	1807	0.597	1044	690	1133	674	94832
48	2	5	Hs~Ref:NM_016073.2~uORF:IOH10649~RFU:13179.87	HA20457~B48R05C02	16690	53040	110	1096	1175	489	41	168	168	287	292	101	97	78	0	2007	1909	273	14	343	343	341	167	48	100	100	0	0.558	0.643	0.630	0.573	1.743	0.643	0.499	80	557	100	2592	2573	-0.842	928	1664	1007	1566	93999
42	8	9	Hs~MGC:BC015008.1~uORF:IOH23029~RFU:4339.52	HA20457~B42R09C08	8800	49340	110	1096	1000	491	49	47	47	48	13	27	100	100	0	1063	1033	185	17	167	167	177	33	18	100	100	0	1.171	1.100	1.050	0.955	1.964	1.305	0.660	80	546	100	1945	1819	0.227	1049	896	953	866	79994
25	6	8	Hs~Ref:NM_006332.1~uORF:IOH13656~RFU:22107.51	HA20457~B25R08C06	3790	31170	110	1095	1344	517	38	48	48	49	18	36	100	100	0	1168	1165	133	11	114	114	115	13	11	100	100	0	0.993	1.233	1.035	1.152	1.460	1.398	0.745	80	559	100	2101	2347	-0.010	1047	1054	1296	1051	107487
21	3	4	Hs~MGC:BC022988.1~uORF:IOH22366~RFU:35225.98	HA20457~B21R04C03	3170	25860	110	1095	1245	443	35	48	48	98	188	191	100	98	0	1551	1572	97	6	126	126	176	154	87	100	100	0	0.735	0.828	0.738	0.779	1.428	0.831	0.644	80	558	100	2472	2643	-0.445	1047	1425	1197	1446	99622
47	7	18	Hs~MGC:BC013959.1~uORF:IOH14481~RFU:25272.93	HA20457~B47R18C07	13140	55640	110	1095	1245	555	44	49	49	85	113	132	100	100	0	1080	1080	108	10	188	188	213	71	33	100	100	0	1.173	1.341	1.188	1.217	1.530	1.562	0.726	80	529	100	1938	2088	0.230	1046	892	1196	892	99604
10	8	6	Hs~Ref:NM_206853.1~uORF:IOH59363~RFU:34128.82	HA20457~B10R06C08	8570	12730	110	1095	1215	490	40	50	50	124	188	151	100	96	0	617	639	77	12	148	148	182	123	67	100	100	0	2.228	2.373	2.100	2.178	1.558	2.596	0.615	80	567	100	1514	1656	1.156	1045	469	1165	491	97184
48	9	16	Hs~Ref:NM_001008234.1~uORF:IOH58628~RFU:10813.32	HA20457~B48R16C09	18100	55230	110	1094	1233	530	42	47	47	49	18	36	100	100	0	1668	1574	277	17	149	149	154	25	16	100	100	0	0.689	0.832	0.812	0.766	1.494	0.926	0.781	80	556	100	2566	2611	-0.537	1047	1519	1186	1425	98674
12	12	12	Hs~Ref:NM_021038.3~uORF:IOH26398~RFU:6393.01	HA20457~B12R12C12	18430	13900	110	1094	1145	449	39	47	47	47	5	10	100	100	0	863	843	122	14	91	91	96	28	29	100	100	0	1.356	1.460	1.354	1.368	1.605	1.720	0.738	80	546	100	1819	1850	0.440	1047	772	1098	752	91608
36	16	20	Hs~Ref:NM_178338.2~uORF:IOH50134~RFU:18061.14	HA20457~B36R20C16	19380	42460	110	1094	1103	420	38	47	47	52	25	48	100	100	0	1498	1451	223	15	102	102	108	27	25	100	100	0	0.750	0.783	0.834	0.718	1.638	0.832	0.743	80	572	100	2443	2405	-0.415	1047	1396	1056	1349	88277
9	7	4	Hs~MGC:BC024187.2~uORF:IOH10699~RFU:25823.1	HA20457~B09R04C07	3910	12340	110	1094	1091	478	43	48	48	59	52	88	100	100	0	1455	1474	138	9	113	113	120	37	30	100	100	0	0.779	0.766	0.721	0.678	1.655	0.827	0.715	80	587	100	2388	2404	-0.360	1046	1342	1043	1361	87274
3	11	19	Hs~Ref:NM_018983.2~uORF:IOH3041~RFU:6018.42	HA20457~B03R19C11	13650	6330	110	1094	1034	565	54	46	46	47	12	25	95	95	0	928	892	208	23	92	92	100	37	37	100	100	0	1.254	1.235	1.262	0.932	3.464	1.572	0.616	80	568	100	1884	1788	0.326	1048	836	988	800	82752
7	8	6	Hs~Ref:NM_203284.1~uORF:IOH39978~RFU:22289.3	HA20457~B07R06C08	13110	8220	110	1093	1274	569	44	48	48	115	168	146	100	100	0	1582	1576	92	5	102	102	170	141	82	100	100	0	0.706	0.832	0.727	0.766	1.482	1.048	0.591	80	552	100	2525	2700	-0.502	1045	1480	1226	1474	101909
48	20	3	Hs~Ref:NM_031303.1~uORF:IOH45470~RFU:6163.5	HA20457~B48R03C20	20270	52620	110	1093	1120	491	43	46	46	49	14	28	100	100	0	736	718	102	14	111	111	122	32	26	100	100	0	1.675	1.769	1.675	1.585	1.659	2.133	0.761	80	575	100	1672	1681	0.744	1047	625	1074	607	89576
47	8	18	Hs~MGC:BC013959.1~uORF:IOH14481~RFU:24417.03	HA20457~B47R18C08	13340	55650	110	1092	1224	577	47	48	48	73	81	110	100	100	0	1109	1123	175	15	194	194	205	45	21	100	100	0	1.141	1.266	1.103	1.150	1.534	1.628	0.700	80	594	100	1959	2105	0.190	1044	915	1176	929	97888
43	5	5	Hs~MGC:BC017212.2~uORF:IOH13041~RFU:11372.27	HA20457~B43R05C05	12690	48510	110	1092	1087	410	37	48	48	51	23	45	100	100	0	1196	1191	108	9	158	158	159	34	21	100	100	0	1.006	1.006	0.982	0.925	1.608	1.130	0.719	80	576	100	2082	2072	0.008	1044	1038	1039	1033	86933
22	18	20	Hs~Ref:NM_199247.1~uORF:IOH43177~RFU:36827.57	HA20457~B22R20C18	10640	29020	110	1091	1239	445	35	47	47	61	80	131	100	100	0	2267	2345	547	23	94	94	115	100	86	100	100	0	0.480	0.530	0.485	0.501	1.491	0.470	0.707	80	556	100	3217	3443	-1.058	1044	2173	1192	2251	99153
33	7	7	Hs~Ref:NM_000997.2~uORF:IOH1585~RFU:4347.16	HA20457~B33R07C07	4060	39930	110	1090	1183	427	36	47	47	49	15	30	100	100	0	1039	1064	362	34	171	171	174	31	17	100	100	0	1.202	1.272	1.326	1.307	1.865	1.316	0.669	80	575	100	1911	2029	0.265	1043	868	1136	893	94624
37	9	7	Hs~MGC:BC020221.1~uORF:IOH13291~RFU:11462.05	HA20457~B37R07C09	4480	44490	110	1090	1157	461	39	47	47	47	11	23	100	100	0	900	883	91	10	147	147	151	22	14	100	100	0	1.385	1.508	1.441	1.390	1.523	1.762	0.793	80	574	100	1796	1846	0.470	1043	753	1110	736	92570
4	6	16	Hs~Ref:NM_002645.1~CAT:PV5586~RFU:6504.84	HA20457~B04R16C06	17190	5710	110	1090	1142	475	41	47	47	62	51	82	100	98	0	1367	1307	303	23	102	102	122	57	46	100	100	0	0.825	0.909	0.809	0.845	1.991	1.028	0.563	80	542	100	2308	2300	-0.278	1043	1265	1095	1205	91372
1	1	20	Hs~Ref:NM_031950.1~uORF:IOH10917~RFU:36930.13	HA20457~B01R20C01	2660	6570	110	1089	1244	463	37	49	49	85	120	141	100	100	0	1160	1183	137	11	137	137	192	107	55	100	100	0	1.017	1.142	1.102	1.068	1.471	1.294	0.629	80	598	100	2063	2241	0.024	1040	1023	1195	1046	99535
23	7	5	Hs~MGC:BC010929.1~uORF:IOH12868~RFU:15465.07	HA20457~B23R05C07	12950	26030	110	1088	1150	362	31	48	48	54	67	124	100	100	0	980	1300	1742	134	104	104	106	19	17	100	100	0	1.187	0.921	1.202	1.092	1.741	0.320	0.210	80	585	100	1916	2298	0.248	1040	876	1102	1196	91966
20	13	14	Hs~Ref:NM_014370.2~uORF:IOH60262~RFU:12526.04	HA20457~B20R14C13	18650	23280	110	1088	1106	357	32	49	49	79	171	216	98	97	0	946	943	78	8	91	91	94	21	22	100	100	0	1.215	1.241	1.229	1.163	1.484	1.505	0.741	80	577	100	1894	1909	0.281	1039	855	1057	852	88452
14	22	16	Hs~Ref:NM_001009613.1~uORF:IOH58584~RFU:34660.53	HA20457~B14R16C22	11370	19220	110	1086	1357	697	51	51	51	168	246	146	100	87	0	2200	2036	440	21	99	99	266	317	119	100	97	0	0.493	0.674	0.568	0.601	1.734	0.696	0.629	80	586	100	3136	3243	-1.021	1035	2101	1306	1937	108564
27	2	17	Hs~MGC:BC015600.1~uORF:IOH12286~RFU:2206.1	HA20457~B27R17C02	12030	32930	110	1086	1219	614	50	48	48	60	88	146	100	97	0	227	217	28	12	104	104	104	8	7	100	100	0	8.439	10.363	9.231	9.104	1.663	12.985	0.768	80	558	100	1161	1284	3.077	1038	123	1171	113	97498
29	18	19	Hs~Ref:NM_018132.3~uORF:IOH45979~RFU:20160.48	HA20457~B29R19C18	6270	37820	110	1086	1145	742	64	76	76	619	3019	487	0	0	0	883	887	63	7	146	146	173	85	49	100	100	0	1.370	1.443	1.315	1.140	2.107	2.673	0.314	80	548	100	1747	1810	0.455	1010	737	1069	741	91572
28	20	20	Hs~Ref:NM_178341.1~uORF:IOH50137~RFU:9597.28	HA20457~B28R20C20	20120	33490	110	1086	1098	393	35	49	49	54	30	55	100	100	0	855	854	46	5	88	88	98	30	30	100	100	0	1.352	1.369	1.316	1.267	1.547	1.557	0.714	80	566	100	1804	1815	0.435	1037	767	1049	766	87837
25	19	6	Hs~MGC:BC021983.1~uORF:IOH27884~RFU:20327.38	HA20457~B25R06C19	6380	30740	110	1085	1144	492	43	46	46	48	14	29	100	100	0	1512	1537	171	11	106	106	107	10	9	100	100	0	0.739	0.767	0.727	0.692	1.600	0.846	0.797	80	558	100	2445	2529	-0.436	1039	1406	1098	1431	91489
48	1	22	ERa~N/A	HA20457~B48R22C01	16510	56430	110	1084	1154	481	41	82	82	180	191	106	98	97	0	1171	1187	100	8	224	224	295	138	46	100	100	0	1.058	1.113	1.099	1.004	1.579	1.332	0.697	80	602	100	1949	2035	0.081	1002	947	1072	963	92351
45	14	16	Hs~MGC:BC050538.1~uORF:IOH26922~RFU:7015.28	HA20457~B45R16C14	5500	55240	110	1084	1046	367	35	45	45	52	41	78	100	100	0	781	748	137	18	175	175	191	54	28	100	100	0	1.715	1.747	1.784	1.676	1.422	1.893	0.824	80	577	100	1645	1574	0.778	1039	606	1001	573	83666
43	18	3	Hs~MGC:BC036391.1~uORF:IOH22062~RFU:8051.53	HA20457~B43R03C18	15290	48090	110	1082	1477	1085	73	47	47	51	28	54	100	100	0	567	563	47	8	119	119	120	17	14	100	100	0	2.310	3.221	2.258	2.555	2.080	6.455	0.430	80	577	100	1483	1874	1.208	1035	448	1430	444	118163
41	4	12	Hs~MGC:BC034784.1~uORF:IOH22773~RFU:12122.4	HA20457~B41R12C04	3540	49980	110	1082	1250	517	41	47	47	50	26	52	100	100	0	1164	1127	160	14	195	195	211	59	27	100	100	0	1.068	1.291	1.144	1.190	1.478	1.523	0.747	80	576	100	2004	2135	0.095	1035	969	1203	932	99978
43	17	4	Hs~MGC:BC009289.2~uORF:IOH12925~RFU:21358.82	HA20457~B43R04C17	15090	48290	110	1082	1249	784	62	50	50	944	5198	550	0	0	0	263	266	17	6	125	125	131	30	22	100	100	0	7.478	8.504	7.148	6.685	2.146	17.626	0.482	80	556	100	1170	1340	2.903	1032	138	1199	141	99906
26	18	8	Hs~Ref:NM_144982.1~uORF:IOH12275~RFU:46972.71	HA20457~B26R08C18	10710	31160	110	1081	1120	429	38	49	49	111	185	166	100	93	0	2689	2748	247	8	104	104	136	86	63	100	100	0	0.399	0.405	0.385	0.370	1.622	0.415	0.613	80	536	100	3617	3715	-1.325	1032	2585	1071	2644	89582
37	19	22	ERa~N/A	HA20457~B37R22C19	6480	47470	110	1081	1118	560	50	87	87	260	298	114	92	80	0	1128	1221	355	29	230	230	261	135	51	100	98	0	1.107	1.040	1.083	0.908	1.891	1.282	0.556	80	599	100	1892	2022	0.147	994	898	1031	991	89426
46	17	3	Hs~Ref:NM_004113.3~uORF:IOH34727~RFU:16251.86	HA20457~B46R03C17	10650	52650	110	1080	1198	545	45	52	52	280	372	132	93	77	0	1361	1400	179	12	375	375	417	202	48	100	100	0	1.043	1.118	1.000	1.006	1.723	1.661	0.407	80	562	100	2014	2171	0.060	1028	986	1146	1025	95813
43	11	19	Hs~Ref:NM_001018061.1~uORF:IOH57329~RFU:26284.41	HA20457~B43R19C11	13910	51300	110	1080	1181	367	31	48	48	54	36	66	100	100	0	1236	1221	98	8	147	147	148	20	13	100	100	0	0.948	1.055	1.038	0.996	1.450	1.085	0.772	80	509	100	2121	2207	-0.078	1032	1089	1133	1074	94500
27	19	2	Hs~MGC:BC031228.1~uORF:IOH21599~RFU:50346.07	HA20457~B27R02C19	15430	29920	110	1079	1141	416	36	48	48	60	51	85	100	100	0	662	671	40	5	106	106	117	29	24	100	100	0	1.854	1.935	1.791	1.787	1.504	2.223	0.785	80	569	100	1587	1658	0.891	1031	556	1093	565	91303
8	19	6	Hs~MGC:BC040020.2~uORF:IOH26263~RFU:31283.84	HA20457~B08R06C19	19770	8170	110	1079	1047	320	30	54	54	215	299	139	100	86	0	1518	1547	149	9	163	163	279	204	73	100	100	0	0.756	0.717	0.717	0.683	1.379	0.823	0.560	80	566	100	2380	2377	-0.403	1025	1355	993	1384	83759
2	6	20	Hs~Ref:NM_003792.1~uORF:IOH10852~RFU:18460.7	HA20457~B02R20C06	8160	6570	110	1078	1118	573	51	47	47	47	4	8	100	100	0	1192	1094	289	26	133	133	148	65	43	97	96	0	0.974	1.114	1.074	0.954	2.630	1.340	0.622	80	569	100	2090	2032	-0.039	1031	1059	1071	961	89423
43	8	4	Hs~Ref:NM_001956.1~uORF:IOH22678~RFU:5580.79	HA20457~B43R04C08	13290	48300	110	1077	1170	474	40	47	47	54	50	92	100	100	0	1149	1116	113	10	116	116	117	15	12	100	100	0	0.997	1.123	1.055	1.033	1.582	1.292	0.749	80	567	100	2063	2123	-0.004	1030	1033	1123	1000	93588
47	10	15	Hs~MGC:BC014051.1~uORF:IOH14549~RFU:20889.74	HA20457~B47R15C10	13780	55010	110	1076	1161	397	34	45	45	47	20	42	100	100	0	601	604	41	6	157	157	157	12	7	100	100	0	2.322	2.497	2.384	2.344	1.495	3.045	0.736	80	577	100	1475	1563	1.215	1031	444	1116	447	92865
20	7	5	Hs~MGC:NM_174972.1~uORF:IOH43392~RFU:9817.69	HA20457~B20R05C07	17450	21490	110	1076	1155	346	29	50	50	83	124	149	100	100	0	685	697	46	6	158	158	149	61	40	100	100	0	1.947	2.050	1.955	1.973	1.322	2.329	0.771	80	556	100	1553	1644	0.961	1026	527	1105	539	92405
9	22	2	Hs~Ref:NM_014303.2~uORF:IOH21738~RFU:40431.22	HA20457~B09R02C22	6900	11930	110	1076	999	353	35	80	80	225	255	113	100	85	0	1972	2005	174	8	464	464	628	478	76	100	100	0	0.660	0.596	0.629	0.550	1.512	0.498	0.461	80	567	100	2504	2460	-0.598	996	1508	919	1541	79914
12	7	13	Hs~Ref:NM_001001550.1~uORF:IOH13204~RFU:26384.86	HA20457~B12R13C07	17420	14110	110	1074	1102	411	37	51	51	112	128	114	100	100	0	761	791	99	12	120	120	170	84	49	100	100	0	1.596	1.566	1.646	1.451	1.605	1.757	0.614	80	566	100	1664	1722	0.674	1023	641	1051	671	88180
[truncated: 21,733 more rows]
[truncated: 7 more columns]
