# Supplementary material for: Monitoring Drug-Target Interactions through Target Engagement-Mediated Amplification on Arrays and in situ
Source: Research Square preprint supplement (doi:10.21203/rs.3.rs-1109577/v1), 2021-12-06
Supplement: Supplementary file 3 [file cd49b23d62b57a9178d0a14e.xlsx]

## Sheet: Dasatinib 5 nM probe
Block	Column	Row	Name	ID	X	Y	Dia.	F635 Median	F635 Mean	F635 SD	F635 CV	B635	B635 Median	B635 Mean	B635 SD	B635 CV	% > B635+1SD	% > B635+2SD	F635 % Sat.	F532 Median	F532 Mean	F532 SD	F532 CV	B532	B532 Median	B532 Mean	B532 SD	B532 CV	% > B532+1SD	% > B532+2SD	F532 % Sat.	Ratio of Medians (635/532)	Ratio of Means (635/532)	Median of Ratios (635/532)	Mean of Ratios (635/532)	Ratios SD (635/532)	Rgn Ratio (635/532)	Rgn R2 (635/532)	F Pixels	B Pixels	Circularity	Sum of Medians (635/532)	Sum of Means (635/532)	Log Ratio (635/532)	F635 Median - B635	F532 Median - B532	F635 Mean - B635	F532 Mean - B532	F635 Total Intensity
18	14	16	Hs~Ref:NM_014220.2~uORF:IOH59024~RFU:10813.44	HA20421~B18R16C14	9390	33810	130	65535	53920	19955	37	38	38	45	24	53	100	100	60	3824	3260	1275	39	175	175	176	11	6	100	100	0	17.949	17.466	16.973	19.395	2.095	17.991	0.906	135	542	96	69146	56967	4.166	65497	3649	53882	3085	7279262
39	12	7	Hs~Ref:NM_001721.2~uORF:IOH11645~RFU:9387.02	HA20421~B39R07C12	13570	54520	140	65535	51269	20039	39	38	38	46	28	60	100	100	60	707	620	256	41	233	233	213	60	28	82	77	0	138.179	132.38	117.378	159.155	2.224	122.622	0.699	170	531	60	65971	51618	7.11	65497	474	51231	387	8715726
18	13	16	Hs~Ref:NM_014220.2~uORF:IOH59024~RFU:10757.09	HA20421~B18R16C13	9190	33820	130	65535	53988	19687	36	40	40	44	17	38	100	100	63	3837	3303	1291	39	175	175	175	10	5	100	100	0	17.885	17.247	16.798	19.217	2.076	17.725	0.909	137	502	96	69157	57076	4.161	65495	3662	53948	3128	7396338
25	4	16	Hs~MGC:NM_015191.1~CAT:PV4792~RFU:13083.04	HA20421~B25R16C04	2890	42790	130	65535	52008	20991	40	41	41	46	20	43	100	100	52	1944	1700	862	50	202	202	207	24	11	95	95	0	37.597	34.691	33.415	46.192	2.473	34.56	0.845	147	492	95	67236	53465	5.233	65494	1742	51967	1498	7645113
17	6	16	Hs~Ref:NM_005781.2~CAT:PV4807~RFU:16052.54	HA20421~B17R16C06	3280	33830	140	65535	51777	22467	43	42	42	59	51	86	100	100	62	3677	4660	7075	151	188	188	203	73	35	89	86	0	18.771	11.569	16.976	24.21	4.25	11.1	0.287	168	514	91	68982	56207	4.23	65493	3489	51735	4472	8698556
21	1	19	Hs~Ref:NM_002350.1~N/A~RFU:6953.42	HA20421~B21R19C01	2300	38920	150	65535	53542	20892	39	42	42	48	26	54	100	100	67	1129	975	404	41	189	189	189	13	6	99	98	0	69.673	68.066	66.322	75.893	2.468	74.666	0.715	173	699	91	66433	54286	6.123	65493	940	53500	786	9262744
21	2	19	Hs~Ref:NM_002350.1~N/A~RFU:6878.42	HA20421~B21R19C02	2500	38920	150	65535	52237	21999	42	42	42	47	28	59	100	100	65	1118	948	503	53	191	191	194	21	10	93	86	0	70.65	68.95	65.559	102.327	2.997	67.714	0.796	180	510	87	66420	52952	6.143	65493	927	52195	757	9402578
21	11	19	Hs~Ref:NM_080416.1~uORF:IOH10603~RFU:18591.08	HA20421~B21R19C11	4310	38920	140	65535	53174	20862	39	42	42	48	23	47	100	100	64	3114	2805	1727	61	203	203	204	15	7	97	95	0	22.498	20.42	20.811	33.775	3.181	19.456	0.821	161	487	90	68404	55734	4.492	65493	2911	53132	2602	8560947
25	3	16	Hs~MGC:NM_015191.1~CAT:PV4792~RFU:13088.84	HA20421~B25R16C03	2690	42790	130	65535	50890	20559	40	42	42	47	17	36	100	100	54	1919	1706	765	44	203	203	203	12	5	97	95	0	38.166	33.831	32.39	40.531	2.546	33.956	0.895	141	460	92	67209	52351	5.254	65493	1716	50848	1503	7175447
39	6	8	Hs~Ref:NM_002530.1~N/A~RFU:15270.33	HA20421~B39R08C06	12360	54730	140	65535	57580	16385	28	42	42	58	51	87	100	100	73	1391	1232	655	53	240	240	243	22	9	91	87	0	56.901	58.002	52.186	91.248	3.506	55.728	0.743	160	491	94	66644	58530	5.83	65493	1151	57538	992	9212723
5	5	16	Hs~N/A:NM_006206.3~CAT:PV4680~RFU:10100.7	HA20421~B05R16C05	3100	20320	130	65535	54091	20066	37	44	44	53	30	56	100	100	67	1021	935	548	58	162	162	162	10	6	99	96	0	76.241	69.919	72.93	104.953	2.665	66.977	0.758	151	472	90	66350	54820	6.252	65491	859	54047	773	8167683
8	13	15	Hs~Ref:NM_000061.1~CAT:PV3363~RFU:1346.98	HA20421~B08R15C13	18190	20080	140	65535	61649	11059	17	44	44	51	27	52	100	100	82	196	608	1812	298	159	159	159	11	6	74	67	0	1770.03	137.205	1523.05	1083.27	4.79	130.682	0.047	158	513	95	65528	62054	10.79	65491	37	61605	449	9740522
8	14	15	Hs~Ref:NM_000061.1~CAT:PV3363~RFU:1452.75	HA20421~B08R15C14	18390	20070	130	65535	60995	11541	18	44	44	55	50	90	100	100	81	188	189	20	10	159	159	160	11	6	81	63	0	2258.31	2031.7	1984.58	2178.91	1.841	2059.98	0.518	149	489	92	65520	60981	11.141	65491	29	60951	30	9088327
17	5	16	Hs~Ref:NM_005781.2~CAT:PV4807~RFU:16184.73	HA20421~B17R16C05	3080	33820	130	65535	58272	15310	26	44	44	51	27	52	100	100	73	3352	2909	1811	62	185	185	186	9	4	99	96	0	20.679	21.376	20.517	36.149	3.977	20.599	0.722	146	476	95	68658	60952	4.37	65491	3167	58228	2724	8507707
21	17	15	Hs~Ref:NM_004441.3~CAT:PV3786~RFU:17155.51	HA20421~B21R15C17	5500	38110	140	65535	58077	16384	28	44	44	63	57	90	100	100	73	770	848	541	63	201	201	213	56	26	84	79	0	115.098	89.696	96.169	130.191	3.423	90.606	0.544	157	521	88	66060	58680	6.847	65491	569	58033	647	9118129
39	11	7	Hs~Ref:NM_001721.2~uORF:IOH11645~RFU:9680.72	HA20421~B39R07C11	13370	54520	140	65535	51367	20781	40	44	44	50	29	58	100	100	62	802	1005	1201	119	233	233	226	65	28	90	84	0	115.098	66.481	107.893	106.473	3.009	89.134	0.111	180	540	69	66060	52095	6.847	65491	569	51323	772	9246085
5	6	16	Hs~N/A:NM_006206.3~CAT:PV4680~RFU:10882.23	HA20421~B05R16C06	3310	20320	130	65535	57074	16436	28	45	45	53	33	62	100	100	72	1087	976	494	50	162	162	163	10	6	98	97	0	70.8	70.06	70.533	98.429	2.527	67.105	0.805	136	512	91	66415	57843	6.146	65490	925	57029	814	7762029
35	22	19	Hs~Ref:NM_002037.1~N/A~RFU:27083.54	HA20421~B35R19C22	15580	52420	200	65535	57458	15203	26	45	45	73	101	138	100	100	63	2721	11879	17872	150	236	236	511	724	141	97	85	2	26.354	4.931	22.605	12.62	4.903	6.243	0.112	321	1071	45	67975	69056	4.72	65490	2485	57413	11643	18444125
45	13	14	Hs~MGC:BC009195.2~uORF:IOH12344~RFU:7676.11	HA20421~B45R14C13	4770	64930	130	65535	52359	22087	42	45	45	55	33	60	100	100	65	2568	2439	1252	51	182	182	182	15	8	99	98	0	27.448	23.179	22.787	28.1	2.576	23.825	0.832	135	551	96	67876	54571	4.779	65490	2386	52314	2257	7068430
9	17	15	Hs~Ref:NM_000222.1~CAT:P3081~RFU:930.71	HA20421~B09R15C17	5500	24580	130	65535	61235	11242	18	46	46	65	125	192	100	100	79	190	194	30	15	170	170	170	12	7	64	37	0	3274.45	2549.54	2847.35	2953.37	2.242	2442.59	0.238	153	473	91	65509	61213	11.677	65489	20	61189	24	9368954
17	19	15	Hs~Ref:NM_001721.2~CAT:PV3371~RFU:1020.64	HA20421~B17R15C19	5880	33620	150	65535	58785	15468	26	46	46	70	93	132	100	100	79	350	1201	2043	170	184	184	214	226	105	45	30	0	394.512	57.757	306.023	310.421	7.583	58.979	0.145	187	504	93	65655	59756	8.624	65489	166	58739	1017	10992765
17	20	15	Hs~Ref:NM_001721.2~CAT:PV3371~RFU:972.98	HA20421~B17R15C20	6080	33620	160	65535	56881	18016	31	46	46	72	102	141	100	100	74	1055	3074	4343	141	184	184	210	207	98	61	59	0	75.188	19.666	72.604	93.53	12.185	30.825	0.093	198	599	85	66360	59725	6.232	65489	871	56835	2890	11262401
21	18	15	Hs~Ref:NM_004441.3~CAT:PV3786~RFU:16995.62	HA20421~B21R15C18	5700	38120	150	65535	51946	22741	43	46	46	73	76	104	100	100	62	895	936	723	77	200	200	214	64	29	75	69	0	94.229	70.516	87.063	119.077	4.038	75.482	0.465	173	542	95	66184	52636	6.558	65489	695	51900	736	8986634
21	12	19	Hs~Ref:NM_080416.1~uORF:IOH10603~RFU:18241.75	HA20421~B21R19C12	4510	38920	140	65535	55782	17528	31	46	46	53	30	56	100	100	66	3399	2907	1510	51	203	203	203	13	6	100	100	0	20.491	20.612	19.398	29.272	2.774	19.764	0.862	148	486	94	68685	58440	4.357	65489	3196	55736	2704	8255731
31	1	16	Hs~Ref:NM_001715.2~CAT:PV3683~RFU:605.11	HA20421~B31R16C01	11340	47340	160	65535	48141	23744	49	46	46	123	369	300	100	100	57	294	991	1607	162	218	218	209	37	17	65	51	0	861.697	62.219	387.509	304.044	6.04	55.507	0.228	192	689	83	65565	48868	9.751	65489	76	48095	773	9243094
39	5	8	Hs~Ref:NM_002530.1~N/A~RFU:18189.11	HA20421~B39R08C05	12160	54720	140	65535	58316	15037	25	46	46	82	103	125	100	100	78	1321	1190	589	49	230	230	235	22	9	97	91	0	60.027	60.698	57.296	93.751	3.161	58.24	0.772	149	542	93	66580	59230	5.908	65489	1091	58270	960	8689048
6	15	5	Hs~Ref:NM_016507.1~N/A~RFU:7785.1	HA20421~B06R05C15	9550	18080	130	65535	56490	16196	28	47	47	88	348	395	100	100	66	2331	2141	942	43	168	168	168	16	9	100	100	0	30.276	28.608	27.466	34.456	2.108	28.413	0.859	130	455	96	67651	58416	4.92	65488	2163	56443	1973	7343667
8	15	5	Hs~Ref:NM_004431.1~N/A~RFU:13911.4	HA20421~B08R05C15	18580	18080	130	65535	56337	17891	31	47	47	53	25	47	100	100	71	1451	5882	12205	207	160	160	161	11	6	100	99	0	50.727	9.837	47.06	37.111	5.056	8.848	0.167	146	448	92	66779	62012	5.665	65488	1291	56290	5722	8225196
8	16	5	Hs~Ref:NM_004431.1~N/A~RFU:14733.55	HA20421~B08R05C16	18780	18080	130	65535	55946	18066	32	47	47	52	23	44	100	100	71	1548	1309	561	42	160	160	166	24	14	99	95	0	47.182	48.65	46.183	59.562	2.242	47.784	0.892	143	495	94	66876	57048	5.56	65488	1388	55899	1149	8000345
23	6	7	Hs~Ref:NM_005248.1~uORF:IOH21152~RFU:7915.22	HA20421~B23R07C06	12320	36500	150	65535	49985	23920	47	47	47	52	21	40	100	100	62	612	3093	8008	258	183	183	183	11	6	92	87	0	152.653	17.161	114.49	97.04	6.178	16.415	0.107	199	365	79	65917	52848	7.254	65488	429	49938	2910	9946982
48	18	15	Hs~Ref:NM_005232.1~CAT:PV3841~RFU:12955.83	HA20421~B48R15C18	19310	65060	140	65535	50918	23440	46	47	47	57	34	59	100	100	66	1394	1225	786	64	169	169	170	13	7	98	95	0	53.46	48.173	53.286	63.506	2.591	52.443	0.604	160	401	91	66713	51927	5.74	65488	1225	50871	1056	8146816
2	14	7	Hs~MGC:BC017941.1~uORF:IOH13654~RFU:25932.79	HA20421~B02R07C14	9390	14020	150	65535	57887	14927	25	48	48	65	56	86	100	100	71	6445	5095	2481	48	168	168	182	55	30	100	100	0	10.433	11.739	10.36	14.788	2.17	11.469	0.848	166	512	93	71764	62766	3.383	65487	6277	57839	4927	9609311
6	14	5	Hs~Ref:NM_004226.1~N/A~RFU:27050.39	HA20421~B06R05C14	9350	18080	160	65535	57322	16280	28	48	48	121	433	357	100	100	73	5419	4238	2340	55	172	172	181	40	22	99	98	0	12.481	14.086	12.25	18.552	2.305	13.53	0.792	212	524	90	70734	61340	3.642	65487	5247	57274	4066	12152343
21	19	18	Hs~Ref:NM_002350.1~N/A~RFU:17084.37	HA20421~B21R18C19	5910	38720	160	65535	61440	10924	17	48	48	72	108	150	100	100	85	1596	2785	3166	113	204	204	208	53	25	84	79	0	47.045	23.786	45.121	70.443	6.674	26.011	0.259	200	563	94	66879	63973	5.556	65487	1392	61392	2581	12288069
27	2	16	Hs~Ref:NM_004444.2~CAT:PV3251~RFU:1066.56	HA20421~B27R16C02	11510	42820	170	65535	54911	15199	27	48	48	67	151	225	100	100	54	478	2778	4915	176	202	202	203	15	7	90	72	0	237.272	21.298	233.882	175.866	10.303	20.145	0.165	261	492	87	65763	57439	7.89	65487	276	54863	2576	14331735
9	20	15	Hs~Ref:NM_001014796.1~CAT:PV3870~RFU:12720.04	HA20421~B09R15C20	6090	24580	130	65535	57204	16650	29	49	49	57	28	49	100	100	76	1192	1804	2344	129	168	168	168	11	6	99	97	0	63.951	34.936	63.089	78.451	3.642	32.692	0.324	147	499	96	66510	58791	5.999	65486	1024	57155	1636	8408985
22	8	19	Hs~MGC:BC016652.1~N/A~RFU:9065.77	HA20421~B22R19C08	8200	38890	140	65535	58878	14018	23	49	49	59	32	54	100	100	75	496	939	1118	119	198	198	207	90	43	71	63	0	219.752	79.391	194.336	202.638	4.804	104.573	0.083	158	541	92	65784	59570	7.78	65486	298	58829	741	9302786
29	2	16	Hs~Ref:NM_005157.2~CAT:PV3864~RFU:647.69	HA20421~B29R16C02	2560	47300	140	65535	55510	18995	34	49	49	59	37	62	100	100	73	243	509	588	115	211	211	242	219	90	31	26	0	2046.44	186.111	1156.2	693.627	6.894	289.41	0.033	163	506	95	65518	55759	10.999	65486	32	55461	298	9048157
34	5	16	Hs~Ref:NP_005408~CAT:P3044~RFU:561.32	HA20421~B34R16C05	7630	51830	150	65535	54135	19812	36	49	49	87	173	198	100	100	68	410	1903	3077	161	227	227	225	15	6	75	71	0	357.847	32.271	126.824	162.584	11.319	37.056	0.149	189	529	90	65669	55762	8.483	65486	183	54086	1676	10231546
45	14	14	Hs~MGC:BC009195.2~uORF:IOH12344~RFU:7812.03	HA20421~B45R14C14	4970	64920	130	65535	52407	21111	40	49	49	66	52	78	100	100	61	2657	2431	1100	45	181	181	217	133	61	94	90	0	26.448	23.27	22.937	27.927	2.523	24.464	0.839	131	539	89	67962	54608	4.725	65486	2476	52358	2250	6865303
48	17	15	Hs~Ref:NM_005232.1~CAT:PV3841~RFU:12886.31	HA20421~B48R15C17	19110	65060	140	65535	57986	16045	27	49	49	60	38	63	100	100	74	1395	1333	714	53	173	173	184	72	39	92	89	0	53.589	49.946	52.684	64.525	2.536	49.714	0.72	143	404	90	66708	59097	5.744	65486	1222	57937	1160	8291935
9	18	15	Hs~Ref:NM_000222.1~CAT:P3081~RFU:934.03	HA20421~B09R15C18	5700	24580	140	65535	57510	16151	28	50	50	61	50	81	100	100	74	198	219	115	52	171	171	171	12	7	74	51	0	2425.37	1197.08	2182.83	2171.31	2.6	1135.95	0.13	158	466	94	65512	57508	11.244	65485	27	57460	48	9086614
23	5	7	Hs~Ref:NM_005248.1~uORF:IOH21152~RFU:8185.81	HA20421~B23R07C05	12110	36480	150	65535	48731	23888	49	50	50	60	32	53	100	100	60	1356	3506	5079	144	184	184	187	20	10	93	88	0	55.875	14.654	37.971	40.685	8.142	31.274	0.04	217	405	72	66657	52003	5.804	65485	1172	48681	3322	10574652
27	1	16	Hs~Ref:NM_004444.2~CAT:PV3251~RFU:965.22	HA20421~B27R16C01	11300	42810	160	65535	53878	16498	30	50	50	381	1506	395	100	100	55	857	7078	13713	193	200	200	222	102	45	58	56	2	99.673	7.826	85.045	97.184	15.28	6.61	0.171	247	603	81	66142	60706	6.639	65485	657	53828	6878	13307872
22	7	19	Hs~MGC:BC016652.1~N/A~RFU:8850.3	HA20421~B22R19C07	8000	38890	140	65535	56152	18453	32	51	51	65	55	84	100	100	70	686	1736	2707	155	201	201	208	28	13	85	81	0	135.019	36.548	128.18	115.056	6.806	42.087	0.156	164	522	94	65969	57636	7.077	65484	485	56101	1535	9209008
29	1	16	Hs~Ref:NM_005157.2~CAT:PV3864~RFU:660.95	HA20421~B29R16C01	2360	47300	140	65535	53909	21084	39	51	51	64	67	104	100	100	71	394	3329	5230	157	209	209	218	40	18	69	59	0	353.968	17.262	112.596	126.096	11.564	16.208	0.267	166	640	95	65669	56978	8.467	65484	185	53858	3120	8948955
31	13	15	Hs~Ref:NM_023109.1~CAT:PV3146~RFU:1295.79	HA20421~B31R15C13	13740	47140	120	65535	55223	17228	31	51	51	61	36	59	100	100	53	291	288	36	12	213	213	235	62	26	72	4	0	839.538	735.627	807.191	756.212	1.777	997.281	0.241	114	527	91	65562	55247	9.713	65484	78	55172	75	6295415
34	6	16	Hs~Ref:NP_005408~CAT:P3044~RFU:617.9	HA20421~B34R16C06	7840	51820	160	65535	50519	21230	42	51	51	91	173	190	100	100	56	237	521	1001	192	227	227	226	14	6	41	29	0	6548.4	171.66	1209.55	700.039	8.364	164.445	0.076	179	537	90	65494	50762	12.677	65484	10	50468	294	9042885
45	22	15	Hs~Ref:NM_001031812.2~CAT:PV3838~RFU:15852.31	HA20421~B45R15C22	6560	65130	130	65535	54554	19265	35	51	51	59	32	54	100	100	66	2112	1773	751	42	168	168	169	14	8	99	98	0	33.685	33.958	32.234	43.528	2.911	35.921	0.805	130	458	92	67428	56108	5.074	65484	1944	54503	1605	7092055
47	13	14	Hs~Ref:NM_005206.2~uORF:IOH1805~RFU:9779.6	HA20421~B47R14C13	13810	64880	130	65535	53501	20979	39	51	51	63	46	73	100	100	67	1177	982	403	41	184	184	184	12	6	93	93	0	65.946	66.98	64.263	72.617	2.386	69.308	0.834	144	532	85	66477	54248	6.043	65484	993	53450	798	7704215
3	11	12	Hs~Ref:NM_000061.1~uORF:IOH21063~RFU:21897.48	HA20421~B03R12C11	13300	15010	140	65535	58988	14067	23	52	52	64	52	81	100	100	75	2339	3891	6696	172	166	166	167	9	5	100	100	0	30.135	15.822	29.779	33.061	3.142	15.088	0.209	154	607	93	67656	62661	4.913	65483	2173	58936	3725	9084182
6	16	5	Hs~Ref:NM_016507.1~N/A~RFU:7503.73	HA20421~B06R05C16	9750	18070	130	65535	55241	17745	32	52	52	74	85	114	100	100	65	2536	2279	927	40	170	170	181	33	18	100	99	0	27.677	26.168	25.903	29.48	1.819	26.239	0.903	126	534	87	67849	57298	4.791	65483	2366	55189	2109	6960344
12	13	16	Hs~Ref:NM_002031.2~uORF:IOH56137~RFU:9109.9	HA20421~B12R16C13	18210	24810	140	65535	59222	14451	24	52	52	66	47	71	100	100	77	569	573	449	78	163	163	163	11	6	94	91	0	161.288	144.317	157.411	216.717	2.662	137.827	0.437	162	553	89	65889	59580	7.333	65483	406	59170	410	9593949
12	14	16	Hs~Ref:NM_002031.2~uORF:IOH56137~RFU:9523.04	HA20421~B12R16C14	18410	24800	140	65535	58895	15013	25	52	52	67	47	70	100	100	77	588	559	288	51	161	161	161	11	6	96	91	0	153.356	147.847	151.594	228.159	2.812	142.248	0.682	161	604	84	65910	59241	7.261	65483	427	58843	398	9482025
16	16	5	Hs~Ref:NM_001721.2~N/A~RFU:27009.37	HA20421~B16R05C16	18790	27110	200	65535	61223	9390	15	52	52	9462	22076	233	99	92	72	5424	5089	1554	30	177	177	849	1566	184	95	88	0	12.48	12.453	12.212	13.337	1.511	13.087	0.88	283	1059	5	70730	66083	3.642	65483	5247	61171	4912	17326098
32	19	15	Hs~Ref:NM_005157.2~CAT:PV3863~RFU:922.91	HA20421~B32R15C19	19470	47100	140	65535	62079	10155	16	52	52	161	483	300	100	100	87	218	273	144	52	196	196	205	75	36	22	12	0	2976.5	805.545	2112.36	1730.79	4.253	1298.71	0.028	162	446	90	65505	62104	11.539	65483	22	62027	77	10056775
37	19	15	Hs~Ref:AAH59394~CAT:P2907~RFU:482.12	HA20421~B37R15C19	5950	56130	150	65535	53122	21317	40	52	52	81	95	117	100	100	66	3495	6490	8361	128	209	209	215	37	17	96	93	0	19.928	8.449	14.388	20.964	6.429	8.789	0.3	184	547	93	68769	59351	4.317	65483	3286	53070	6281	9774416
45	4	8	Hs~Ref:NM_005235.1~N/A~RFU:8694.84	HA20421~B45R08C04	2960	63720	140	65535	60562	11999	19	52	52	69	52	75	100	100	79	1556	1447	791	54	198	198	199	17	8	98	95	0	48.22	48.447	45.889	71.727	3.163	47.377	0.699	162	545	89	66841	61759	5.592	65483	1358	60510	1249	9810967
4	22	15	Hs~Ref:NP_694592~CAT:P3042~RFU:932.75	HA20421~B04R15C22	20000	15600	150	65535	62340	8832	14	53	53	73	60	82	100	100	79	178	314	580	184	149	149	170	89	52	10	7	0	2258	377.497	2046.31	1631.24	3.448	393.627	0.049	170	627	87	65511	62452	11.141	65482	29	62287	165	10597833
19	8	9	Hs~Ref:NM_006246.2~uORF:IOH29856~RFU:20812.22	HA20421~B19R09C08	12700	32410	140	65535	58082	15700	27	53	53	144	263	182	100	100	75	3689	3024	1380	45	214	214	537	867	161	79	75	0	18.844	20.651	18.466	26.998	2.675	23.711	0.604	161	540	95	68957	60839	4.236	65482	3475	58029	2810	9351167
47	1	8	Hs~Ref:NM_007314.1~N/A~RFU:3621.78	HA20421~B47R08C01	11400	63690	130	65535	52513	21351	40	53	53	60	30	50	100	100	64	882	752	255	33	191	191	201	64	31	90	88	0	94.764	93.512	90.32	100.208	2.011	98.618	0.865	142	586	92	66173	53021	6.566	65482	691	52460	561	7456854
47	14	14	Hs~Ref:NM_005206.2~uORF:IOH1805~RFU:9646.28	HA20421~B47R14C14	14020	64880	130	65535	58824	14200	24	53	53	71	54	76	100	100	75	1325	2600	3948	151	183	183	184	11	5	100	98	0	57.34	24.316	52.344	60.656	4.317	23.773	0.24	137	547	96	66624	61188	5.841	65482	1142	58771	2417	8058950
9	19	15	Hs~Ref:NM_001014796.1~CAT:PV3870~RFU:13089.26	HA20421~B09R15C19	5890	24580	130	65535	54509	19926	36	54	54	63	34	53	100	100	68	1433	1423	1111	78	170	170	173	20	11	93	89	0	51.846	43.46	48.541	73.053	3.798	43.718	0.549	151	407	90	66744	55708	5.696	65481	1263	54455	1253	8230825
19	7	9	Hs~Ref:NM_006246.2~uORF:IOH29856~RFU:20392.58	HA20421~B19R09C07	12500	32410	150	65535	57264	17009	29	54	54	123	238	193	100	100	70	3598	2884	1512	52	202	202	451	823	182	78	71	0	19.282	21.331	18.917	29.167	2.502	23.302	0.577	170	527	96	68877	59892	4.269	65481	3396	57210	2682	9734964
26	22	15	Hs~Ref:NM_004431.1~CAT:PV3688~RFU:27081.05	HA20421~B26R15C22	11030	42620	160	65535	56119	18665	33	54	54	134	313	233	100	100	71	2590	4171	6047	144	200	200	202	21	10	98	95	0	27.398	14.119	23.898	36.544	5.26	13.915	0.26	196	569	93	67871	60036	4.776	65481	2390	56065	3971	10999360
41	16	15	Hs~Ref:NM_004438.1~CAT:PV3651~RFU:19327.99	HA20421~B41R15C16	5380	60620	150	65535	58663	15224	25	54	54	90	135	150	100	100	77	1755	2319	2175	93	185	185	186	13	6	98	97	0	41.708	27.464	41.655	63.501	4.767	25.872	0.483	167	432	94	67051	60743	5.382	65481	1570	58609	2134	9796645
23	18	15	Hs~Ref:NM_005233.3~CAT:PV3359~RFU:1512.1	HA20421~B23R15C18	14720	38100	150	65535	50620	24135	47	55	55	95	146	153	100	100	64	16785	16626	15496	93	180	180	198	170	85	82	80	0	3.943	3.075	3.714	9.751	21.795	4.166	0.234	201	602	66	82085	67011	1.979	65480	16605	50565	16446	10174683
29	1	8	Hs~Ref:NM_004443.2~N/A~RFU:27112.96	HA20421~B29R08C01	2360	45690	150	65535	54793	20131	36	55	55	103	140	135	100	100	72	3792	3035	1564	51	214	214	245	90	36	98	96	0	18.301	19.404	18.014	23.846	1.93	19.242	0.865	177	684	90	69058	57559	4.194	65480	3578	54738	2821	9698372
45	5	8	Hs~Ref:NM_004444.2~N/A~RFU:5478.92	HA20421~B45R08C05	3160	63740	130	65535	57645	14889	25	55	55	70	45	64	100	100	69	1484	1214	534	43	186	186	185	11	5	98	95	0	50.447	56.021	48.308	78.333	3.024	56.026	0.778	146	436	92	66778	58618	5.657	65480	1298	57590	1028	8416104
45	6	8	Hs~Ref:NM_004444.2~N/A~RFU:5130.61	HA20421~B45R08C06	3360	63720	130	65535	53380	19182	35	55	55	69	48	69	100	100	63	1445	1231	586	47	184	184	185	13	7	96	92	0	51.927	50.931	44.666	75.984	3.778	51.201	0.81	151	482	92	66741	54372	5.698	65480	1261	53325	1047	8060416
29	15	18	Hs~MGC:BC056911.1~uORF:IOH29120~RFU:27059.51	HA20421~B29R18C15	5160	47690	140	65535	56204	17404	30	56	56	77	54	70	100	100	70	4497	3786	2030	53	235	235	240	28	11	98	94	0	15.363	15.812	14.929	23.104	3.196	15.531	0.8	157	481	90	69741	59699	3.941	65479	4262	56148	3551	8824104
2	13	7	Hs~MGC:BC017941.1~uORF:IOH13654~RFU:26060.83	HA20421~B02R07C13	9190	14020	140	65535	57959	15163	26	58	58	77	67	87	100	100	62	5499	5477	4626	84	173	173	220	145	65	100	100	0	12.294	10.916	11.657	14.344	2.217	10.766	0.529	162	423	84	70803	63205	3.62	65477	5326	57901	5304	9389357
17	4	9	Hs~Ref:NM_004383.1~uORF:IOH29870~RFU:27089.34	HA20421~B17R09C04	2880	32430	160	65535	52492	22419	42	58	58	132	297	225	100	100	68	2178	1886	792	41	189	189	210	102	48	98	98	0	32.92	30.898	29.749	28.569	1.929	34.483	0.812	190	498	94	67466	54131	5.041	65477	1989	52434	1697	9973459
35	21	19	Hs~Ref:NM_002037.1~N/A~RFU:27061.16	HA20421~B35R19C21	15370	52420	190	65535	62966	7857	12	58	58	112	150	133	100	100	81	2484	3347	2523	75	244	244	394	465	118	95	91	0	29.231	20.273	27.792	27.47	2.394	21.3	0.284	288	539	86	67717	66011	4.869	65477	2240	62908	3103	18134095
3	12	12	Hs~Ref:NM_000061.1~uORF:IOH21063~RFU:17853.1	HA20421~B03R12C12	13500	15010	140	65535	58665	14384	24	59	59	76	57	75	100	100	77	2227	2962	3207	108	165	165	168	14	8	100	99	0	31.754	20.953	31.313	39.39	3.274	19.712	0.428	153	606	94	67538	61403	4.989	65476	2062	58606	2797	8975807
22	22	14	Hs~Ref:NM_005536.2~uORF:IOH21098~RFU:24532.89	HA20421~B22R14C22	10990	37880	160	65535	53824	21099	39	60	60	119	198	166	100	100	68	2008	7160	10867	151	187	187	190	27	14	94	86	0	35.956	7.71	22.877	33.147	9.447	7.483	0.25	214	745	79	67296	60737	5.168	65475	1821	53764	6973	11518341
32	15	15	Hs~Ref:NM_006575.2~CAT:PV3682~RFU:13632.11	HA20421~B32R15C15	18670	47100	140	65535	53093	20059	37	60	60	70	41	58	100	100	64	1442	1268	637	50	192	192	192	13	6	98	94	0	52.38	49.287	46.734	65.907	2.371	47.384	0.864	150	328	88	66725	54109	5.711	65475	1250	53033	1076	7963918
40	6	16	Hs~IVGN:NM_000074~CAT_PHP0025~N/A	HA20421~B40R16C06	16870	56300	120	65535	57911	15000	25	60	60	130	283	217	100	100	73	258	258	16	6	253	253	273	73	26	0	0	0	13095	11570.2	4676.79	5301.38	2.29	9054.1	0.01	119	529	93	65480	57856	13.677	65475	5	57851	5	6891355
45	3	8	Hs~Ref:NM_005235.1~N/A~RFU:10708.91	HA20421~B45R08C03	2760	63720	130	65535	62651	8526	13	60	60	95	125	131	100	100	84	1535	1362	512	37	220	220	242	97	40	96	90	0	49.791	54.808	49.565	68.267	2.235	53.883	0.811	152	481	96	66790	63733	5.638	65475	1315	62591	1142	9522916
37	20	15	Hs~Ref:AAH59394~CAT:P2907~RFU:434.89	HA20421~B37R15C20	6140	56130	140	65535	57010	17515	30	61	61	97	107	110	100	100	74	852	1414	1428	100	209	209	231	84	36	65	59	0	101.826	47.261	81.624	156.476	8.803	47.706	0.367	161	505	96	66117	58154	6.67	65474	643	56949	1205	9178634
41	22	15	Hs~Ref:NP_005239~CAT:P3041~RFU:306.49	HA20421~B41R15C22	6570	60630	150	65535	62306	9193	14	61	61	97	179	184	100	100	81	367	1933	2521	130	193	193	199	50	25	62	53	0	376.287	35.773	279.932	219.869	10.825	35.277	0.259	185	694	91	65648	63985	8.556	65474	174	62245	1740	11526625
17	3	9	Hs~Ref:NM_004383.1~uORF:IOH29870~RFU:26966.27	HA20421~B17R09C03	2680	32430	160	65535	49236	24924	50	62	62	188	398	211	100	100	64	2420	2424	1499	61	191	191	230	149	64	97	97	0	29.373	22.021	25.124	20.667	2.504	25.453	0.645	202	448	96	67702	51407	4.876	65473	2229	49174	2233	9945754
14	3	8	Hs~Ref:NM_005356.2~N/A~RFU:25125.15	HA20421~B14R08C03	7180	27700	210	65535	64189	4578	7	63	63	8162	20279	248	100	99	87	659	1781	1940	108	184	184	340	993	292	39	33	0	137.836	40.154	137.836	97.939	4.184	46.899	0.149	345	1211	81	65947	65723	7.107	65472	475	64126	1597	22145224
29	2	8	Hs~Ref:NM_004443.2~N/A~RFU:27078.57	HA20421~B29R08C02	2560	45690	140	65535	61108	11326	18	63	63	116	141	121	100	100	81	3859	3391	1222	36	220	220	251	88	35	100	99	0	17.992	19.251	17.709	22.378	1.866	19.054	0.891	149	514	87	69111	64216	4.169	65472	3639	61045	3171	9105137
41	15	15	Hs~Ref:NM_004438.1~CAT:PV3651~RFU:18134.99	HA20421~B41R15C15	5190	60620	180	65535	54140	21553	39	63	63	100	125	125	100	100	69	1419	3564	4780	134	189	189	193	26	13	96	90	0	53.229	16.023	52.803	38.396	9.722	47.57	0.03	184	600	30	66702	57452	5.734	65472	1230	54077	3375	9961702
41	21	15	Hs~Ref:NP_005239~CAT:P3041~RFU:263.69	HA20421~B41R15C21	6370	60620	140	65535	62248	9309	14	63	63	112	203	181	100	100	81	884	3551	6453	181	193	193	200	58	29	73	65	0	94.75	18.518	67.917	111.377	9.976	17.689	0.166	176	508	93	66163	65543	6.566	65472	691	62185	3358	10955589
21	20	18	Hs~Ref:NM_002350.1~N/A~RFU:16431.29	HA20421~B21R18C20	6110	38720	170	65535	57330	16853	29	65	65	182	532	292	100	100	72	6681	8379	9019	107	209	209	518	1490	287	61	57	0	10.116	7.009	10.103	25.97	11.835	8.405	0.237	215	521	73	71942	65435	3.339	65470	6472	57265	8170	12325910
14	5	9	Hs~Ref:NM_003135.1~uORF:IOH59899~RFU:6679.29	HA20421~B14R09C05	7590	27870	130	65535	54965	17919	32	66	66	2311	10515	454	99	88	55	1647	1479	631	42	174	174	190	156	82	86	83	0	44.446	42.068	43.306	56.749	2.677	41.908	0.857	138	458	90	66942	56204	5.474	65469	1473	54899	1305	7585135
29	16	18	Hs~MGC:BC056911.1~uORF:IOH29120~RFU:27064.06	HA20421~B29R18C16	5360	47700	130	65535	58768	14233	24	66	66	104	162	155	100	100	75	4570	3720	1575	42	234	234	237	26	10	100	97	0	15.099	16.839	14.64	21.677	2.649	16.773	0.842	139	418	86	69805	62188	3.916	65469	4336	58702	3486	8168748
42	1	16	Hs~Ref:NM_002031.1~CAT:PV3874~RFU:1696.27	HA20421~B42R16C01	6870	60820	160	65535	45478	25051	55	66	66	364	1126	309	100	100	52	522	937	1093	116	195	195	226	96	42	78	63	0	200.211	61.202	108.508	101.348	2.574	60.475	0.348	209	734	75	65796	46154	7.645	65469	327	45412	742	9504831
43	18	5	Hs~Ref:NM_005433.2~uORF:IOH26758~RFU:27063.65	HA20421~B43R05C18	14810	58620	140	65535	61208	10873	17	66	66	179	288	160	100	100	80	407	483	284	58	208	208	206	29	14	85	76	0	328.99	222.335	228.514	304.967	2.924	207.314	0.34	220	385	72	65668	61417	8.362	65469	199	61142	275	13465719
47	2	8	Hs~Ref:NM_007314.1~N/A~RFU:3737.89	HA20421~B47R08C02	11610	63690	130	65535	55687	17852	32	66	66	164	552	336	100	100	72	908	799	243	30	195	195	197	17	8	97	95	0	91.822	92.088	88.352	106.227	2.039	93.984	0.9	136	411	94	66182	56225	6.521	65469	713	55621	604	7573482
6	13	5	Hs~Ref:NM_004226.1~N/A~RFU:27039.62	HA20421~B06R05C13	9150	18080	160	65535	56278	17218	30	67	67	1886	3861	204	100	100	69	5731	4372	2348	53	182	182	286	225	78	99	98	0	11.798	13.416	11.705	16.705	1.889	12.733	0.817	225	566	91	71017	60401	3.56	65468	5549	56211	4190	12662611
31	2	16	Hs~Ref:NM_001715.2~CAT:PV3683~RFU:614.95	HA20421~B31R16C02	11550	47340	140	65535	61149	9637	15	68	68	417	2391	573	100	100	73	392	1135	1927	169	208	208	214	109	50	66	42	0	355.799	65.891	307.835	255.217	4.603	61.194	0.136	208	294	68	65651	62008	8.475	65467	184	61081	927	12718894
31	14	15	Hs~Ref:NM_023109.1~CAT:PV3146~RFU:1355.05	HA20421~B31R15C14	13940	47140	120	65535	55670	17824	32	70	70	93	67	72	100	100	64	262	260	27	10	205	205	209	67	32	22	1	0	1148.51	1010.91	1062.62	1071.16	1.562	1204.55	0.088	120	474	79	65522	55655	10.166	65465	57	55600	55	6680452
29	17	18	Hs~Ref:NM_001715.2~uORF:IOH57009~RFU:27071.11	HA20421~B29R18C17	5570	47690	160	65535	62893	8562	13	71	71	153	225	147	100	100	88	1132	3828	5191	135	227	227	231	30	12	92	86	0	72.336	17.446	70.316	71.081	7.037	17.037	0.242	209	508	92	66369	66423	6.177	65464	905	62822	3601	13144740
32	18	15	Hs~Ref:NM_005158.2~CAT:PV3266~RFU:868.8	HA20421~B32R15C18	19260	47110	190	65535	45958	24206	52	72	72	523	1502	287	100	100	55	546	3839	10812	281	195	195	229	121	52	60	53	0	186.504	12.592	104.191	111.594	8.817	10.441	0.126	252	635	75	65814	49530	7.543	65463	351	45886	3644	11581396
23	17	15	Hs~Ref:NM_005233.3~CAT:PV3359~RFU:1444.97	HA20421~B23R15C17	14520	38110	130	65535	61059	12157	19	74	74	128	211	164	100	100	81	756	1602	2060	128	181	181	195	63	32	72	68	0	113.845	42.917	90.291	150.294	8.709	44.138	0.246	146	435	90	66036	62406	6.831	65461	575	60985	1421	8914604
40	5	16	Hs~IVGN:NM_000074~CAT_PHP0025~N/A	HA20421~B40R16C05	16670	56300	120	65535	58077	15173	26	74	74	129	137	106	100	100	69	251	277	89	32	246	246	281	80	28	8	3	0	13092.2	1871.07	3117.19	3022.78	3.972	5883.58	0.004	116	485	80	65466	58034	13.676	65461	5	58003	31	6736889
47	4	8	Hs~Ref:NM_004441.2~N/A~RFU:21610.67	HA20421~B47R08C04	12000	63680	190	65535	53379	18866	35	74	74	1486	3531	237	100	100	65	593	1125	1236	109	190	190	203	67	33	71	65	0	162.434	57.011	141.998	161.893	4.823	50.36	0.392	260	786	88	65864	54240	7.344	65461	403	53305	935	13878579
16	15	5	Hs~Ref:NM_001721.2~N/A~RFU:26990.72	HA20421~B16R05C15	18600	27070	110	65535	65535	0	0	75	75	20098	29035	144	100	100	100	6921	6990	763	10	189	189	1529	2082	136	100	98	0	9.724	9.625	9.724	9.708	1.156	11.52	0.796	80	394	100	72192	72261	3.282	65460	6732	65460	6801	5242800
43	17	5	Hs~Ref:NM_005433.2~uORF:IOH26758~RFU:27055.78	HA20421~B43R05C17	14620	58610	190	65535	58426	13334	22	76	76	191	290	151	100	100	71	1459	2816	3141	111	215	215	222	40	18	93	90	0	52.62	22.434	49.044	52.429	4.834	23.753	0.279	249	536	75	66703	60951	5.718	65459	1244	58350	2601	14548034
45	1	8	Hs~Ref:NM_004383.1~N/A~RFU:27082.3	HA20421~B45R08C01	2350	63730	150	65535	63703	5973	9	76	76	736	1247	169	100	100	86	2460	2640	1035	39	234	234	533	584	109	97	94	0	29.407	26.445	28.691	29.038	1.602	36.522	0.49	198	662	94	67685	66033	4.878	65459	2226	63627	2406	12613216
4	21	15	Hs~Ref:NP_694592~CAT:P3042~RFU:903.78	HA20421~B04R15C21	19800	15600	150	65535	63335	7797	12	77	77	92	60	65	100	100	86	170	170	19	11	156	156	259	256	98	0	0	0	4675.57	4518.43	3636.56	3874.88	2.215	17165.1	0.001	172	442	90	65472	63272	12.191	65458	14	63258	14	10893601
45	1	16	Hs~Ref:NM_005157.2~CAT:P3049~RFU:673.38	HA20421~B45R16C01	2360	65330	150	65535	59399	14901	25	77	77	142	175	123	100	100	79	950	2761	5221	189	222	222	252	87	34	100	95	0	89.915	23.364	77.397	55.278	3.451	24.406	0.134	185	648	92	66186	61861	6.49	65458	728	59322	2539	10988895
39	22	15	Hs~Ref:NM_004439.4~CAT:PV3840~RFU:18201.97	HA20421~B39R15C22	15570	56120	170	65535	57511	15659	27	80	80	2056	9563	465	100	94	71	545	838	756	90	232	232	348	625	179	32	16	0	209.121	94.771	148.424	154.963	3.359	101.444	0.181	175	878	92	65768	58037	7.708	65455	313	57431	606	10064495
45	2	16	Hs~Ref:NM_005157.2~CAT:P3049~RFU:640.04	HA20421~B45R16C02	2560	65330	150	65535	62081	9197	14	83	83	193	360	186	100	100	82	424	1860	3590	193	200	200	223	67	30	64	55	0	292.196	37.348	246.989	236.727	9.036	35.706	0.139	176	482	94	65676	63658	8.191	65452	224	61998	1660	10926262
32	20	15	Hs~Ref:NM_005157.2~CAT:PV3863~RFU:894.38	HA20421~B32R15C20	19670	47100	140	65535	63036	8133	12	84	84	178	363	203	100	100	85	229	334	265	79	190	190	233	139	59	27	12	0	1678.23	437.167	1006.94	961.863	4.138	476.935	0.114	162	519	92	65490	63096	10.713	65451	39	62952	144	10211803
26	21	15	Hs~Ref:NM_004431.1~CAT:PV3688~RFU:27074.84	HA20421~B26R15C21	10830	42620	140	65535	61923	10295	16	85	85	177	290	163	100	100	81	1647	3722	4983	133	207	207	250	134	53	88	83	0	45.451	17.593	43.897	49.684	5.075	16.768	0.258	171	394	94	66890	65353	5.506	65450	1440	61838	3515	10588833
22	21	14	Hs~Ref:NM_005536.2~uORF:IOH21098~RFU:23346.78	HA20421~B22R14C21	10800	37890	150	65535	62306	8449	13	86	86	189	267	141	100	100	82	1019	1905	1947	102	186	186	209	123	58	82	78	0	78.57	36.195	63.481	88.66	5.758	38.095	0.296	189	405	90	66282	63939	6.296	65449	833	62220	1719	11775866
39	21	15	Hs~Ref:NM_004439.4~CAT:PV3840~RFU:18010.53	HA20421~B39R15C21	15370	56120	160	65535	58820	13265	22	87	87	409	696	170	100	100	71	3561	8195	10803	131	237	237	381	732	192	62	57	0	19.69	7.38	17.058	25.457	6.567	6.988	0.277	190	493	91	68772	66691	4.299	65448	3324	58733	7958	11175875
40	14	15	Hs~Ref:NM_005157.2~CAT:PV3865~RFU:965.52	HA20421~B40R15C14	18460	56100	170	65535	61478	10561	17	88	88	275	526	191	100	100	81	237	1073	5070	472	225	225	262	120	45	7	6	0	5453.92	72.394	2726.96	1925.16	8.322	135.969	0.005	189	650	70	65459	62238	12.413	65447	12	61390	848	11619362
40	13	15	Hs~Ref:NM_005157.2~CAT:PV3865~RFU:997.85	HA20421~B40R15C13	18270	56110	140	65535	62328	9159	14	91	91	273	564	206	100	100	82	234	245	80	32	222	222	222	34	15	24	7	0	5453.67	2705.96	2845.39	3560.57	3.5	3081.88	0.023	170	484	84	65456	62260	12.413	65444	12	62237	23	10595774
32	17	15	Hs~Ref:NM_005158.2~CAT:PV3266~RFU:844.69	HA20421~B32R15C17	19070	47100	150	65535	59979	12530	20	93	93	963	2227	231	100	100	76	1621	4694	6259	133	191	191	194	39	20	85	78	0	45.764	13.299	45.764	74.54	10.267	12.023	0.294	173	414	92	66872	64389	5.516	65442	1430	59886	4503	10376428
29	18	18	Hs~Ref:NM_001715.2~uORF:IOH57009~RFU:26672.9	HA20421~B29R18C18	5760	47690	160	65535	61065	10600	17	95	95	457	1067	233	100	100	76	766	3379	6263	185	234	234	252	71	28	75	70	0	123.008	19.386	123.165	129.053	8.466	18.41	0.153	198	477	83	65972	64115	6.943	65440	532	60970	3145	12090938
32	16	15	Hs~Ref:NM_006575.2~CAT:PV3682~RFU:15358.88	HA20421~B32R15C16	18870	47100	150	65535	53820	19927	37	95	95	1006	2357	234	100	100	68	1643	1462	759	51	191	191	193	24	12	97	94	0	45.069	42.27	41.549	57.524	2.778	42.149	0.786	150	354	88	66892	54996	5.494	65440	1452	53725	1271	8072988
12	10	16	Hs~MGC:BC065912.1~uORF:IOH40442~RFU:27045.42	HA20421~B12R16C10	17610	24800	150	65535	61958	10694	17	98	98	1065	2887	271	100	100	84	729	2134	3963	185	170	170	238	237	99	77	55	0	117.061	31.497	112.435	96.994	4.098	30.716	0.144	182	483	89	65996	63824	6.871	65437	559	61860	1964	11276362
21	21	7	Hs~Ref:NM_005157.2~N/A~RFU:24014.17	HA20421~B21R07C21	6310	36520	170	65535	55562	19106	34	108	108	1183	5578	471	100	92	71	5770	7956	8382	105	212	212	466	569	122	78	74	0	11.772	7.161	11.253	19.193	11.595	19.312	0.022	228	449	84	70985	63198	3.557	65427	5558	55454	7744	12668218
45	2	8	Hs~Ref:NM_004383.1~N/A~RFU:25950.21	HA20421~B45R08C02	2560	63720	150	65535	63217	7079	11	108	108	572	1004	175	100	100	86	2278	2254	1003	44	250	250	455	381	83	100	87	0	32.262	31.492	32.262	35.047	1.583	36.792	0.632	196	484	89	67455	65113	5.012	65427	2028	63109	2004	12390570
31	16	15	Hs~Ref:NP_002341~CAT:P2906~RFU:1059.59	HA20421~B31R15C16	14350	47140	160	65535	61576	9837	15	110	110	2126	8220	386	100	100	81	493	2735	4264	155	220	220	244	81	33	72	63	0	239.652	24.44	196.068	129.384	8.074	24.681	0.192	186	656	86	65698	63981	7.905	65425	273	61466	2515	11453066
42	2	16	Hs~Ref:NM_002031.1~CAT:PV3874~RFU:2253.16	HA20421~B42R16C02	7080	60820	150	65535	50341	22601	44	111	111	654	1469	224	100	100	61	604	814	629	77	211	211	281	206	73	65	48	0	166.473	83.3	110.033	127.655	2.585	88.219	0.443	188	512	89	65817	50833	7.379	65424	393	50230	603	9464103
47	3	8	Hs~Ref:NM_004441.2~N/A~RFU:19903.08	HA20421~B47R08C03	11800	63670	170	65535	55460	16805	30	128	128	1415	3279	231	100	100	68	573	669	446	66	195	195	233	140	60	67	60	0	173.034	116.734	167.71	215.895	3.628	116.976	0.42	235	570	85	65785	55806	7.435	65407	378	55332	474	13033134
20	14	16	Hs~Ref:NM_006254.3~uORF:IOH26352~RFU:25504.99	HA20421~B20R16C14	18420	33800	140	65535	54018	19650	36	144	144	700	1254	179	100	100	66	3767	3520	2698	76	598	598	588	386	65	85	74	0	20.635	18.437	20.479	26.849	2.879	21.386	0.374	163	602	85	68560	56796	4.367	65391	3169	53874	2922	8804910
31	15	15	Hs~Ref:NP_002341~CAT:P2906~RFU:1005.3	HA20421~B31R15C15	14140	47140	140	65535	61579	9679	15	162	162	2431	8870	364	100	100	80	1000	3281	5937	180	213	213	243	104	42	76	69	0	83.066	20.019	66.234	74.79	6.889	21.003	0.138	177	558	88	66160	64485	6.376	65373	787	61417	3068	10899450
44	16	15	Hs~Ref:NM_001006943.1~CAT:PV3844~RFU:27055.78	HA20421~B44R15C16	18910	60610	150	65535	61071	10486	17	237	237	1198	2584	215	100	100	80	925	1680	2529	150	233	233	627	970	154	27	13	0	94.361	42.041	91.198	100.921	3.773	50.334	0.113	190	537	90	65990	62281	6.56	65298	692	60834	1447	11603423
21	22	7	Hs~Ref:NM_005157.2~N/A~RFU:24469.58	HA20421~B21R07C22	6500	36510	110	65535	65535	0	0	254	254	3746	11820	315	100	100	100	6083	7846	7052	89	211	211	381	477	125	87	81	0	11.117	8.55	11.132	15.583	3.667	9.916	0.144	80	231	100	71153	72916	3.475	65281	5872	65281	7635	5242800
12	9	16	Hs~MGC:BC065912.1~uORF:IOH40442~RFU:26378.71	HA20421~B12R16C09	17410	24790	160	65535	62378	8391	13	406	406	1608	3053	189	100	100	82	1518	4745	7319	154	197	197	297	286	96	86	76	0	49.303	13.626	43.39	39.953	4.42	12.776	0.204	217	542	84	66450	66520	5.624	65129	1321	61972	4548	13536017
20	13	16	Hs~Ref:NM_006254.3~uORF:IOH26352~RFU:26362.97	HA20421~B20R16C13	18220	33800	120	65535	61875	9712	15	438	438	1368	1986	145	100	100	82	3692	3150	1135	36	517	517	564	401	71	89	86	0	20.503	23.333	20.407	27.788	2.145	22.413	0.813	138	460	90	68272	64070	4.358	65097	3175	61437	2633	8538704
44	15	15	Hs~Ref:NM_001006943.1~CAT:PV3844~RFU:27034.64	HA20421~B44R15C15	18710	60600	160	65535	62963	7265	11	746	746	2331	3542	151	100	100	84	713	1091	1333	122	252	252	667	872	130	30	9	0	140.54	74.156	124.594	181.224	5.34	103.354	0.076	195	534	80	65250	63056	7.135	64789	461	62217	839	12277824
44	13	15	Hs~Ref:NM_002576.2~CAT:PV3820~RFU:25116.86	HA20421~B44R15C13	18310	60610	120	65535	63381	6801	10	1027	1027	2233	3120	139	100	100	82	1825	1641	447	27	270	270	385	251	65	94	91	0	41.484	45.481	41.351	51.335	1.898	49.579	0.765	111	345	91	66063	63725	5.374	64508	1555	62354	1371	7035336
44	14	15	Hs~Ref:NM_002576.2~CAT:PV3820~RFU:23971.08	HA20421~B44R15C14	18520	60610	120	65535	63167	6927	10	1079	1079	3015	4014	133	100	100	79	2129	1863	586	31	245	245	390	297	76	96	86	0	34.212	38.373	33.889	44.562	2.019	38.826	0.819	114	323	92	66340	63706	5.096	64456	1884	62088	1618	7201092
14	4	8	Hs~Ref:NM_005356.2~N/A~RFU:24557.43	HA20421~B14R08C04	7390	27670	110	65535	65535	0	0	1186	1186	23328	29439	126	100	100	100	1727	1997	1075	53	215	215	506	1697	335	42	7	0	42.559	36.111	42.59	43.53	1.885	34.978	0.049	80	393	100	65861	66131	5.411	64349	1512	64349	1782	5242800
45	21	15	Hs~Ref:NM_001031812.2~CAT:PV3838~RFU:16390.52	HA20421~B45R15C21	6360	65130	120	65470	49290	21950	44	48	48	54	24	44	100	100	50	2414	4582	4971	108	170	170	171	11	6	98	96	0	29.154	11.161	27.139	22.882	6.105	15.235	0.237	132	457	91	67666	53654	4.866	65422	2244	49242	4412	6506293
35	2	20	Hs~Ref:NM_001570.2~N/A~RFU:10336.01	HA20421~B35R20C02	11570	52600	160	65285	41510	28765	69	45	45	65	86	132	91	86	49	1102	1619	1556	96	230	230	229	14	6	97	94	0	74.817	29.852	61.296	20.044	21.831	85.21	0.049	205	426	48	66112	42854	6.225	65240	872	41465	1389	8509581
22	19	14	Hs~MGC:BC053840.1~uORF:IOH29362~RFU:13187.39	HA20421~B22R14C19	10400	37890	130	65105	48345	22611	46	48	48	65	87	133	100	100	48	2591	2098	971	46	194	194	220	72	32	94	93	0	27.141	25.366	24.638	28.613	2.199	25.984	0.922	133	518	93	67454	50201	4.762	65057	2397	48297	1904	6429907
32	14	15	Hs~Ref:NM_000245.2~CAT:PV3968~RFU:979.49	HA20421~B32R15C14	18470	47110	120	64634	49681	21312	42	49	49	56	23	41	100	100	47	267	268	46	17	194	194	195	14	7	91	79	0	884.726	670.703	711.804	754.31	1.764	673.913	0.761	112	454	93	64658	49706	9.789	64585	73	49632	74	5564310
35	1	20	Hs~Ref:NM_001570.2~N/A~RFU:10262.21	HA20421~B35R20C01	11360	52600	170	64261	39385	29623	75	41	41	47	21	44	99	96	48	1194	2754	3368	122	221	221	221	15	6	98	95	0	66.002	15.533	62.994	10.893	32.284	84.419	0.016	220	683	51	65193	41877	6.044	64220	973	39344	2533	8664761
31	4	19	Hs~Ref:NM_003992.1~N/A~RFU:6734.88	HA20421~B31R19C04	11950	47950	140	63892	44201	25825	58	44	44	96	161	167	100	100	46	1046	978	561	57	218	218	227	38	16	86	80	0	77.111	58.101	66.556	74.754	3.836	68.519	0.591	163	486	90	64676	44917	6.269	63848	828	44157	760	7204792
12	17	14	Hs~Ref:NM_004442.3~N/A~RFU:16933.64	HA20421~B12R14C17	19010	24400	130	63467	53179	16954	31	44	44	48	17	35	100	100	33	2539	2142	901	42	159	159	170	33	19	98	97	0	26.648	26.795	25.778	33.049	2.392	27.167	0.862	145	487	89	65803	55118	4.736	63423	2380	53135	1983	7711003
8	4	16	Hs~Ref:NM_002314.2~CAT:PV4337~RFU:954.4	HA20421~B08R16C04	16380	20270	120	62908	55126	15223	27	40	40	46	18	39	100	100	16	186	184	16	8	161	161	160	10	6	80	58	0	2514.72	2395.04	2108.2	2298.97	1.695	2531.83	0.399	131	491	90	62893	55109	11.296	62868	25	55086	23	7221508
7	2	18	Hs~MGC:BC002755.1~N/A~RFU:27067.79	HA20421~B07R18C02	11500	20720	170	62864	51646	18241	35	62	62	329	1045	317	100	100	37	6340	6729	7263	107	180	180	266	170	63	100	99	0	10.195	7.877	9.889	9.795	1.918	8.074	0.373	223	543	67	68962	58133	3.35	62802	6160	51584	6549	11516953
31	3	19	Hs~Ref:NM_003992.1~N/A~RFU:6525.31	HA20421~B31R19C03	11740	47940	140	62451	45227	25375	56	47	47	110	187	170	100	100	44	885	910	515	56	220	220	235	48	20	88	83	0	93.841	65.478	61.318	78.86	2.638	65.795	0.822	159	470	85	63069	45870	6.552	62404	665	45180	690	7191037
8	3	16	Hs~Ref:NM_002314.2~CAT:PV4337~RFU:877.65	HA20421~B08R16C03	16180	20270	120	62135	54004	16166	29	42	42	45	14	31	100	100	7	187	187	12	6	162	162	162	10	6	88	62	0	2483.72	2158.48	2360.82	2327.3	1.607	2452.58	0.508	134	517	88	62118	53987	11.278	62093	25	53962	25	7236556
12	18	14	Hs~Ref:NM_004442.3~N/A~RFU:9063.31	HA20421~B12R14C18	19210	24400	130	62098	50641	20327	40	50	50	59	33	55	100	100	26	2653	2190	937	42	164	164	178	39	21	99	95	0	24.929	24.971	24.804	29.931	2.777	26.635	0.831	143	496	87	64537	52617	4.64	62048	2489	50591	2026	7241612
45	18	14	Hs~Ref:NM_030952.1~uORF:IOH21129~RFU:8618.59	HA20421~B45R14C18	5760	64930	120	62063	48670	20536	42	58	58	104	123	118	100	100	37	2565	2132	856	40	185	185	207	68	32	99	94	0	26.053	24.968	25.232	27.838	2.051	26.783	0.869	125	510	86	64385	50559	4.703	62005	2380	48612	1947	6083786
29	12	7	Hs~Ref:NM_002110.1~uORF:IOH21123~RFU:5436.35	HA20421~B29R07C12	4560	45490	130	61980	45241	24660	54	37	37	41	11	26	100	100	47	1019	1031	428	41	222	222	223	13	5	100	100	0	77.72	55.876	53.979	50.541	1.832	59.78	0.901	138	509	93	62740	46013	6.28	61943	797	45204	809	6243325
30	21	15	Hs~Ref:NM_004442.3~CAT:PV3625~RFU:13611.94	HA20421~B30R15C21	10840	47110	130	61346	41613	26470	63	42	42	86	317	368	100	100	43	2028	2505	2349	93	226	226	229	22	9	96	93	0	34.02	18.241	23.669	21.128	4.179	21.638	0.447	140	478	88	63106	43850	5.088	61304	1802	41571	2279	5825874
32	13	15	Hs~Ref:NM_000245.2~CAT:PV3968~RFU:1060.17	HA20421~B32R15C13	18270	47110	130	60831	43013	25968	60	51	51	59	34	57	100	100	41	257	267	56	20	194	194	194	12	6	85	71	0	964.762	588.521	612	610.58	2.038	588.42	0.78	134	482	85	60843	43035	9.914	60780	63	42962	73	5763778
10	12	16	Hs~Ref:NM_145909.1~uORF:IOH45888~RFU:27098.46	HA20421~B10R16C12	9010	24770	140	60792	47202	22657	48	42	42	52	29	55	100	100	36	5659	4605	1997	43	181	181	221	94	42	96	95	0	11.09	10.66	11.296	11.445	2.032	11.35	0.92	160	563	90	66228	51584	3.471	60750	5478	47160	4424	7552293
29	19	17	Hs~MGC:BC000884.1~uORF:IOH3230~RFU:9487.87	HA20421~B29R17C19	5950	47490	110	58987	49729	17188	34	59	59	154	268	174	100	100	23	3381	3197	1006	31	236	236	249	68	27	100	100	0	18.737	16.775	16.428	16.859	1.645	18.664	0.794	101	381	87	62073	52631	4.228	58928	3145	49670	2961	5022679
10	11	16	Hs~Ref:NM_145909.1~uORF:IOH45888~RFU:25686.64	HA20421~B10R16C11	8810	24770	130	57256	46977	21930	46	46	46	58	42	72	100	100	42	5872	4953	1804	36	180	180	186	37	19	100	100	0	10.051	9.833	10.962	9.644	1.796	10.753	0.908	137	472	86	62902	51704	3.329	57210	5692	46931	4773	6435906
37	14	14	Hs~MGC:NM_178588.1~uORF:IOH13592~RFU:3822.01	HA20421~B37R14C14	4950	55920	130	56777	44177	23702	53	41	41	47	21	44	100	100	43	1897	1746	831	47	223	223	251	80	31	96	88	0	33.892	28.98	31.322	30.888	1.861	31.43	0.851	130	570	88	58410	45659	5.083	56736	1674	44136	1523	5742964
23	16	18	Hs~Ref:NM_001017926.1~uORF:IOH55729~RFU:14563.39	HA20421~B23R18C16	14330	38710	130	56465	47330	18418	38	46	46	57	35	61	100	100	2	1454	1326	557	42	182	182	182	11	6	100	98	0	44.355	41.332	41.426	46.913	1.933	41.225	0.917	137	472	84	57691	48428	5.471	56419	1272	47284	1144	6484152
22	20	14	Hs~MGC:BC053840.1~uORF:IOH29362~RFU:13539.14	HA20421~B22R14C20	10600	37880	130	56124	43321	24685	56	48	48	85	134	157	100	100	36	2465	2111	979	46	191	191	209	119	56	93	92	0	24.66	22.538	23.043	22.703	2.054	23.894	0.95	135	405	88	58350	45193	4.624	56076	2274	43273	1920	5848270
45	17	14	Hs~Ref:NM_030952.1~uORF:IOH21129~RFU:9312.53	HA20421~B45R14C17	5560	64930	120	55046	47630	19643	41	56	56	85	94	110	100	100	27	2496	2230	925	41	182	182	190	33	17	98	95	0	23.764	23.229	24.514	26.835	2.242	24.632	0.852	120	493	100	57304	49622	4.571	54990	2314	47574	2048	5715577
14	6	9	Hs~Ref:NM_003135.1~uORF:IOH59899~RFU:6455.95	HA20421~B14R09C06	7790	27870	140	54646	44207	21861	49	47	47	100	206	206	100	100	14	1685	1496	714	47	178	178	200	85	42	85	82	0	36.23	33.505	36.309	42.887	3.024	36.432	0.797	149	490	87	56106	45478	5.179	54599	1507	44160	1318	6586795
7	1	18	Hs~MGC:BC002755.1~N/A~RFU:27095.97	HA20421~B07R18C01	11280	20720	160	54282	48318	18469	38	57	57	358	1025	286	100	100	34	6402	5509	2061	37	181	181	580	1487	256	90	84	0	8.716	9.058	9.523	9.574	1.627	10.113	0.726	238	729	59	60446	53589	3.124	54225	6221	48261	5328	11499729
37	13	14	Hs~MGC:NM_178588.1~uORF:IOH13592~RFU:3806.76	HA20421~B37R14C13	4750	55930	120	53511	42099	24433	58	39	39	43	14	32	100	100	35	1785	1651	721	43	223	223	223	12	5	100	100	0	34.233	29.454	31.443	28.195	1.863	32.125	0.923	125	519	89	55034	43488	5.097	53472	1562	42060	1428	5262360
41	16	14	Hs~Ref:NM_130398.1~uORF:IOH5832~RFU:20770.9	HA20421~B41R14C16	5370	60410	160	52987	43990	22522	51	54	54	152	309	203	100	100	30	4062	3099	1738	56	192	192	211	72	34	98	95	0	13.678	15.114	14.805	17.739	2.454	15.802	0.833	193	391	80	56803	46843	3.774	52933	3870	43936	2907	8490050
29	22	7	Hs~Ref:NM_004442.3~N/A~RFU:7737.98	HA20421~B29R07C22	6570	45500	130	52770	41550	23752	57	36	36	41	16	39	100	100	23	1565	1506	664	44	221	221	222	15	6	100	100	0	39.237	32.307	34.619	29.429	1.642	35.091	0.909	133	629	96	54078	42799	5.294	52734	1344	41514	1285	5526085
39	3	8	Hs~Ref:NM_006343.1~N/A~RFU:26713.73	HA20421~B39R08C03	11760	54710	130	52033	46455	17294	37	48	48	93	113	121	100	100	0	4679	4330	1237	28	225	225	245	60	24	100	100	0	11.672	11.305	11.97	11.312	1.538	12.224	0.905	137	536	91	56439	50512	3.545	51985	4454	46407	4105	6364296
45	13	16	Hs~MGC:BC050538.1~uORF:IOH26922~RFU:3782.65	HA20421~B45R16C13	4760	65330	120	49894	45284	20625	45	68	68	86	60	69	100	100	25	1338	1183	384	32	214	214	325	181	55	94	91	0	44.329	46.663	50.095	48.754	2.191	58.37	0.719	108	518	91	50950	46185	5.47	49826	1124	45216	969	4890666
45	14	16	Hs~MGC:BC050538.1~uORF:IOH26922~RFU:3632.11	HA20421~B45R16C14	4960	65330	120	48874	44058	21142	47	54	54	66	39	59	100	100	28	1252	1173	509	43	189	189	285	156	54	92	81	0	45.927	44.72	48.361	46.846	1.924	53.706	0.719	114	502	88	49883	44988	5.521	48820	1063	44004	984	5022576
39	4	8	Hs~Ref:NM_006343.1~N/A~RFU:24454.17	HA20421~B39R08C04	11960	54720	130	48621	45199	16977	37	53	53	109	134	122	100	100	0	4707	4299	1328	30	227	227	235	27	11	100	100	0	10.841	11.087	11.25	11.122	1.685	11.902	0.908	137	498	96	53048	49218	3.438	48568	4480	45146	4072	6192268
21	21	18	Hs~Ref:NM_000075.2~N/A~RFU:8422.43	HA20421~B21R18C21	6300	38720	130	47911	46595	16277	34	65	65	202	609	301	100	100	24	2555	2204	1044	47	210	210	603	1717	284	64	0	0	20.403	23.335	21.141	29.247	2.532	25.487	0.712	143	383	88	50191	48524	4.351	47846	2345	46530	1994	6663120
17	17	15	Hs~Ref:NM_004938.1~CAT:PV3969~RFU:14979.7	HA20421~B17R15C17	5480	33620	120	47622	43464	20138	46	40	40	45	19	42	100	100	3	3021	2781	1597	57	180	180	180	12	6	100	100	0	16.748	16.695	17.787	18.483	2.052	18.045	0.73	129	474	95	50423	46025	4.066	47582	2841	43424	2601	5606801
17	18	15	Hs~Ref:NM_004938.1~CAT:PV3969~RFU:15219.63	HA20421~B17R15C18	5680	33620	130	47118	40409	20440	50	44	44	51	26	50	100	100	1	3002	2887	1607	55	181	181	181	12	6	100	100	0	16.687	14.917	16.175	16.1	2.007	16	0.792	132	476	95	49895	43071	4.061	47074	2821	40365	2706	5334018
7	2	19	Hs~Ref:NM_001715.1~N/A~RFU:4485.66	HA20421~B07R19C02	11490	20910	110	47049	46289	9979	21	50	50	178	887	498	100	100	0	1424	1381	173	12	169	169	171	35	20	100	100	0	37.449	38.151	39.132	37.6	1.189	40.009	0.896	80	351	100	48254	47451	5.227	46999	1255	46239	1212	3703101
12	19	14	Hs~Ref:NM_000525.3~uORF:IOH60138~RFU:6148.68	HA20421~B12R14C19	19410	24400	120	46021	42166	21459	50	44	44	52	29	55	100	100	19	1135	1063	396	37	159	159	162	21	12	98	98	0	47.108	46.595	47.765	44.803	2.224	52.494	0.848	108	547	81	46953	43026	5.558	45977	976	42122	904	4553953
10	10	16	Hs~Ref:NM_001008711.1~uORF:IOH59712~RFU:26454.09	HA20421~B10R16C10	8590	24780	190	45713	43589	20501	47	46	46	60	51	85	100	100	28	948	2858	2505	87	180	180	197	68	34	100	100	0	59.462	16.26	36.392	26.381	2.198	13.753	0.737	306	622	89	46435	46221	5.894	45667	768	43543	2678	13338339
29	11	7	Hs~Ref:NM_002110.1~uORF:IOH21123~RFU:5396.98	HA20421~B29R07C11	4360	45490	130	44886	39884	24239	60	37	37	42	15	35	100	100	29	1290	6222	14486	232	224	224	224	12	5	100	100	0	42.072	6.643	36.817	21.414	3.841	6.555	0.136	133	516	87	45915	45845	5.395	44849	1066	39847	5998	5304630
35	20	19	Hs~Ref:NM_014055.1~uORF:IOH23043~RFU:27067.38	HA20421~B35R19C20	15170	52400	130	44847	39543	19258	48	53	53	109	149	136	100	100	0	5691	5134	1442	28	247	247	285	74	25	100	100	0	8.228	8.081	8.436	7.178	1.857	9.383	0.895	129	440	95	50238	44377	3.041	44794	5444	39490	4887	5101027
45	21	7	Hs~Ref:NM_001616.2~N/A~RFU:15987.11	HA20421~B45R07C21	6360	63520	130	43721	43136	17721	41	73	73	118	117	99	100	100	0	5194	4498	1614	35	194	194	238	94	39	97	97	0	8.73	10.005	10.889	11.02	2.062	10.842	0.882	137	467	75	48648	47367	3.126	43648	5000	43063	4304	5909635
45	22	7	Hs~Ref:NM_001616.2~N/A~RFU:14918.58	HA20421~B45R07C22	6560	63520	140	43716	37987	22508	59	59	59	97	101	104	100	100	3	4973	3894	1941	49	190	190	222	87	39	98	93	0	9.128	10.24	11.046	10.201	2.136	11.118	0.93	162	525	95	48440	41632	3.19	43657	4783	37928	3704	6153917
21	16	15	Hs~Ref:NM_001042599.1~CAT:PV3626~RFU:14906.77	HA20421~B21R15C16	5310	38110	130	43440	37674	22776	60	42	42	56	48	85	100	100	5	3924	3077	1519	49	199	199	212	49	23	97	94	0	11.65	13.076	14.832	13.263	2.673	14.593	0.879	138	478	91	47123	40510	3.542	43398	3725	37632	2878	5199075
23	4	16	Hs~Ref:NM_002376.2~CAT:PV4819~RFU:22113.38	HA20421~B23R16C04	11920	38310	120	43041	38361	19352	50	39	39	44	17	38	100	100	0	2521	2208	758	34	191	191	190	11	5	100	100	0	18.456	19	20.562	18.54	1.936	21.581	0.877	117	497	92	45332	40339	4.206	43002	2330	38322	2017	4488222
23	16	17	Hs~MGC:BC041172.1~uORF:IOH61509~RFU:27074.01	HA20421~B23R17C16	14320	38510	130	42253	37153	20176	54	44	44	54	37	68	100	100	0	3656	3290	1541	46	179	179	179	11	6	100	100	0	12.139	11.928	11.764	12.229	2.061	12.664	0.935	137	486	90	45686	40220	3.602	42209	3477	37109	3111	5089914
23	15	18	Hs~Ref:NM_001017926.1~uORF:IOH55729~RFU:14515.67	HA20421~B23R18C15	14120	38710	120	42103	37438	15773	42	44	44	53	32	60	100	100	0	1476	1309	561	42	183	183	182	10	5	100	100	0	32.528	33.21	35.619	36.284	1.483	33.048	0.937	132	459	91	43352	38520	5.024	42059	1293	37394	1126	4941809
23	3	16	Hs~Ref:NM_002376.2~CAT:PV4819~RFU:22387.29	HA20421~B23R16C03	11720	38310	120	41941	36351	19763	54	40	40	46	25	54	100	100	0	2623	4374	8036	183	191	191	191	10	5	100	100	0	17.229	8.681	15.39	13.447	2.136	7.643	0.274	125	480	91	44333	40494	4.107	41901	2432	36311	4183	4543909
41	15	14	Hs~Ref:NM_130398.1~uORF:IOH5832~RFU:20808.28	HA20421~B41R14C15	5170	60420	150	41384	40071	19819	49	63	63	194	341	175	100	100	12	4428	3662	1769	48	197	197	232	96	41	96	95	0	9.766	11.546	12.673	13.662	2.505	13.803	0.699	165	408	87	45552	43473	3.288	41321	4231	40008	3465	6611745
29	21	7	Hs~Ref:NM_004442.3~N/A~RFU:6988.24	HA20421~B29R07C21	6360	45490	130	41318	37683	23201	61	38	38	41	12	29	100	100	11	1490	1393	551	39	220	220	222	15	6	100	100	0	32.504	32.093	34.279	28.519	1.703	36.123	0.934	134	518	93	42550	38818	5.023	41280	1270	37645	1173	5049475
14	10	12	Hs~Ref:NM_005710.1~uORF:IOH13398~RFU:25386.43	HA20421~B14R12C10	8590	28470	150	40486	39924	17265	43	46	46	90	121	134	100	100	2	3004	2547	1142	44	185	185	218	99	45	96	91	0	14.346	16.883	15.731	20.372	2.229	17.547	0.885	182	574	89	43259	42240	3.843	40440	2819	39878	2362	7266166
7	1	19	Hs~Ref:NM_001715.1~N/A~RFU:4514.68	HA20421~B07R19C01	11290	20910	130	40086	36840	19716	53	48	48	284	887	312	100	100	2	1244	1162	399	34	169	169	192	107	55	96	96	0	37.245	37.051	38.275	34.893	1.844	41.518	0.915	137	514	93	41113	37785	5.219	40038	1075	36792	993	5047036
11	8	16	Hs~Ref:NM_016200.2~uORF:IOH5331~RFU:7120.58	HA20421~B11R16C08	12710	24810	130	38920	33001	13330	40	46	46	49	16	32	100	100	0	2379	1984	874	44	177	177	180	19	10	99	99	0	17.654	18.237	17.87	21.552	2.101	18.295	0.92	131	538	95	41076	34762	4.142	38874	2202	32955	1807	4323134
16	5	20	Hs~MGC:BC008726.1~N/A~RFU:23278.63	HA20421~B16R20C05	16600	30110	180	38845	39281	23923	60	43	43	68	255	375	100	100	36	3948	3605	1090	30	178	178	194	126	64	100	100	0	10.292	11.45	10.918	9.287	1.779	15.196	0.81	278	640	84	42572	42665	3.363	38802	3770	39238	3427	10920210
10	9	16	Hs~Ref:NM_001008711.1~uORF:IOH59712~RFU:25657.5	HA20421~B10R16C09	8400	24790	180	38563	43627	20569	47	45	45	78	148	189	100	100	38	733	2857	2792	97	180	180	197	138	70	99	97	0	69.653	16.28	41.408	29.303	2.369	13.238	0.673	326	565	80	39071	46259	6.122	38518	553	43582	2677	14222417
41	4	18	Hs~Ref:NM_003215.1~N/A~RFU:17200.81	HA20421~B41R18C04	2960	61220	130	38414	35796	21994	61	51	51	57	27	47	100	100	3	3104	2586	1312	50	218	218	218	14	6	100	99	0	13.293	15.095	16.672	17.223	2.463	16.494	0.896	140	497	93	41249	38113	3.733	38363	2886	35745	2368	5011465
12	20	14	Hs~Ref:NM_000525.3~uORF:IOH60138~RFU:6171.89	HA20421~B12R14C20	19610	24390	120	37954	37757	21855	57	42	42	44	14	31	100	100	23	1027	916	419	45	159	159	158	12	7	97	95	0	43.677	49.822	50.677	52.315	2.856	56.181	0.81	119	483	84	38780	38472	5.449	37912	868	37715	757	4493027
15	8	12	Hs~Ref:NM_016508.2~uORF:IOH21339~RFU:13727.55	HA20421~B15R12C08	12680	28500	150	37907	29407	16468	56	58	58	109	165	151	100	100	0	3483	2669	1315	49	185	185	208	62	29	99	97	0	11.476	11.815	12.128	12.353	1.853	12.682	0.914	177	606	92	41147	31833	3.521	37849	3298	29349	2484	5204972
40	4	16	Hs~IVGN:NM_000514~CAT_PHC7041~N/A	HA20421~B40R16C04	16460	56300	100	37591	39065	21522	55	47	47	100	134	134	100	100	12	246	245	13	5	235	235	246	34	13	0	0	0	3413.09	3901.8	3096.47	2997.19	2.394	4300.72	0.082	106	389	93	37555	39028	11.737	37544	11	39018	10	4140912
6	7	3	Hs~MGC:NM_015191.1~uORF:IOH45349~RFU:6295.79	HA20421~B06R03C07	7950	17670	140	37583	38444	19610	51	45	45	51	24	47	100	100	0	1405	1332	516	38	168	168	169	15	8	100	99	0	30.346	32.989	35.098	32.999	1.729	35.435	0.932	137	582	87	38775	39563	4.923	37538	1237	38399	1164	5266867
40	3	16	Hs~IVGN:NM_000514~CAT_PHC7041~N/A	HA20421~B40R16C03	16260	56300	110	37373	37380	21687	58	45	45	60	63	105	100	100	8	251	271	86	31	241	241	248	30	12	17	9	0	3732.8	1244.5	2399.61	2202.48	3.018	897.671	0.2	108	418	90	37338	37365	11.866	37328	10	37335	30	4037004
4	7	9	Hs~MGC:BC022014.2~uORF:IOH56027~RFU:3896.49	HA20421~B04R09C07	16990	14410	120	37301	34690	22575	65	44	44	47	17	36	100	100	0	947	932	415	44	157	157	157	11	7	100	100	0	47.161	44.705	45.419	39.791	1.702	49.78	0.928	124	444	93	38047	35421	5.56	37257	790	34646	775	4301505
29	19	18	Hs~Ref:NM_022156.3~uORF:IOH39856~RFU:27078.57	HA20421~B29R18C19	5950	47690	140	36575	39402	16438	41	86	86	501	1094	218	100	100	7	3740	2775	1552	55	238	238	264	74	28	89	80	0	10.419	15.497	14.203	27.831	5.586	20.183	0.446	188	456	93	39991	41853	3.381	36489	3502	39316	2537	7407502
41	3	18	Hs~Ref:NM_003215.1~N/A~RFU:17405.91	HA20421~B41R18C03	2770	61220	130	36479	34389	19707	57	51	51	57	27	47	100	100	0	3071	2643	1199	45	215	215	216	14	6	99	98	0	12.755	14.143	15.26	16.112	2.433	15.538	0.902	135	500	94	39284	36766	3.673	36428	2856	34338	2428	4642545
43	16	5	Hs~Ref:NM_032933.1~uORF:IOH6290~RFU:27063.65	HA20421~B43R05C16	14430	58590	150	36473	37424	23297	62	73	73	163	247	151	100	100	22	2651	2731	2184	79	214	214	224	45	20	98	85	0	14.936	14.839	19.967	27.864	2.762	13.648	0.835	206	358	74	38837	39868	3.901	36400	2437	37351	2517	7709284
32	4	15	Hs~MGC:BC007888.1~uORF:IOH29315~RFU:8230.15	HA20421~B32R15C04	16470	47100	110	36210	33229	15358	46	57	57	73	49	67	100	100	0	1337	1350	606	44	213	213	285	146	51	98	85	0	32.165	29.175	30.356	31.618	1.671	31.393	0.834	107	424	91	37277	34309	5.007	36153	1124	33172	1137	3555485
8	22	7	Hs~Ref:NM_004850.2~N/A~RFU:12442.81	HA20421~B08R07C22	20000	18480	130	35990	30385	17701	58	42	42	45	15	33	100	100	0	2211	1883	897	47	150	150	150	11	7	100	100	0	17.442	17.509	18.339	17.527	2.215	19.15	0.903	140	482	94	38009	32076	4.124	35948	2061	30343	1733	4253928
6	8	3	Hs~MGC:NM_015191.1~uORF:IOH45349~RFU:6574.67	HA20421~B06R03C08	8150	17670	120	35660	34423	17809	51	44	44	52	31	59	100	100	0	1438	1372	573	41	168	168	169	10	5	100	100	0	28.044	28.554	29.872	29.821	1.771	30.699	0.907	129	494	90	36886	35583	4.81	35616	1270	34379	1204	4440605
32	3	15	Hs~MGC:BC007888.1~uORF:IOH29315~RFU:7567.13	HA20421~B32R15C03	16270	47100	110	35647	30801	15488	50	51	51	74	75	101	100	100	0	1286	1237	531	42	213	213	279	132	47	95	85	0	33.174	30.029	30.275	31.135	1.837	33.625	0.812	110	444	90	36669	31774	5.052	35596	1073	30750	1024	3388113
4	8	9	Hs~MGC:BC022014.2~uORF:IOH56027~RFU:4040.69	HA20421~B04R09C08	17190	14410	130	35031	35117	22297	63	42	42	45	13	28	100	100	3	911	895	392	43	154	154	155	11	7	100	100	0	46.221	47.335	47.878	42.403	1.81	52.826	0.909	125	484	89	35746	35816	5.53	34989	757	35075	741	4389613
38	17	15	Hs~Ref:NM_006206.3~CAT:PV3811~RFU:8417.87	HA20421~B38R15C17	10040	56110	120	34958	34247	20356	59	44	44	48	17	35	100	100	5	1604	1386	629	45	216	216	216	13	6	97	95	0	25.154	29.233	33.011	34.29	2.381	32.387	0.87	123	466	94	36302	35373	4.653	34914	1388	34203	1170	4212421
15	7	12	Hs~Ref:NM_016508.2~uORF:IOH21339~RFU:9758.45	HA20421~B15R12C07	12490	28500	150	34597	29858	15426	51	54	54	81	84	103	100	100	0	3453	2719	1257	46	183	183	196	39	19	98	97	0	10.564	11.752	12.081	13.007	2.217	12.553	0.91	168	640	89	37813	32340	3.401	34543	3270	29804	2536	5016187
22	4	6	Hs~MGC:BC017344.1~uORF:IOH13180~RFU:27042.93	HA20421~B22R06C04	7390	36290	170	34456	27632	17421	63	47	47	62	57	91	100	100	0	6691	4587	3075	67	200	200	205	28	13	100	100	0	5.301	6.288	6.317	7.394	1.919	6.294	0.921	211	461	83	40900	31972	2.406	34409	6491	27585	4387	5830412
36	22	15	Hs~Ref:NM_002609.2~CAT:P3082~RFU:595.89	HA20421~B36R15C22	20060	51630	120	34122	32688	20427	62	52	52	561	1160	206	100	96	0	223	228	22	9	205	205	522	695	133	0	0	0	1892.78	1418.96	1278.24	1371.28	2.226	-434.652	0.008	126	560	77	34088	32659	10.886	34070	18	32636	23	4118664
23	14	15	Hs~Ref:NM_016281.2~CAT:PV3652~RFU:12061.79	HA20421~B23R15C14	13920	38100	110	33927	35641	21212	59	48	48	52	23	44	100	100	9	1972	1687	822	48	184	184	186	16	8	99	97	0	18.948	23.681	24.973	25.84	2.347	26.351	0.852	101	435	92	35667	37096	4.244	33879	1788	35593	1503	3599709
8	21	7	Hs~Ref:NM_004850.2~N/A~RFU:11131.28	HA20421~B08R07C21	19800	18480	140	33750	29475	16999	57	46	46	59	61	103	100	100	0	2201	1851	930	50	150	150	154	23	14	97	94	0	16.433	17.301	17.766	18.757	2.207	18.483	0.912	139	366	93	35755	31130	4.039	33704	2051	29429	1701	4096971
21	15	15	Hs~Ref:NM_001042599.1~CAT:PV3626~RFU:13932.95	HA20421~B21R15C15	5110	38110	130	33658	34199	22364	65	47	47	57	43	75	100	100	0	3960	3138	1481	47	206	206	227	63	27	98	94	0	8.953	11.648	12.866	11.544	2.294	13.681	0.855	135	569	91	37365	37084	3.162	33611	3754	34152	2932	4616857
16	2	8	Hs~MGC:BC021134.1~uORF:IOH23115~RFU:8467.18	HA20421~B16R08C02	16000	27680	120	33437	30291	13022	42	39	39	43	13	30	100	100	0	1742	1551	554	35	167	167	167	13	7	100	100	0	21.205	21.858	21.828	21.503	1.788	23.014	0.934	115	524	93	34973	31636	4.406	33398	1575	30252	1384	3483440
26	22	16	Hs~Ref:NM_152485.2~uORF:IOH26147~RFU:22684.11	HA20421~B26R16C22	11030	42810	140	33127	35505	12459	35	99	99	1661	2748	165	100	100	0	4300	3623	1405	38	210	210	334	222	66	97	97	0	8.075	10.374	10.068	11.803	2.006	11.26	0.748	181	549	80	37118	38819	3.014	33028	4090	35406	3413	6426445
39	13	14	Hs~Ref:NM_005398.2~uORF:IOH13809~RFU:4901.38	HA20421~B39R14C13	13770	55920	130	33054	31823	21646	68	43	43	52	33	63	100	100	0	1209	1182	635	53	225	225	227	13	5	100	98	0	33.548	33.208	33.544	32.386	1.74	35.024	0.925	136	370	79	33995	32737	5.068	33011	984	31780	957	4327991
38	18	15	Hs~Ref:NM_006206.3~CAT:PV3811~RFU:7673.05	HA20421~B38R15C18	10240	56120	120	32508	31558	20968	66	44	44	50	22	44	100	100	0	1584	1375	653	47	219	219	221	15	6	98	94	0	23.783	27.261	29.38	28.684	2.451	31.109	0.856	124	490	96	33829	32670	4.572	32464	1365	31514	1156	3913173
37	1	8	Hs~Ref:NM_001204.3~N/A~RFU:10449.65	HA20421~B37R08C01	2340	54720	130	32274	30315	12562	41	55	55	75	62	82	100	100	0	2104	1899	533	28	205	205	206	14	6	100	100	0	16.966	17.863	18.219	17.597	1.676	19.587	0.908	139	620	89	34118	31954	4.085	32219	1899	30260	1694	4213720
11	7	16	Hs~Ref:NM_016200.2~uORF:IOH5331~RFU:7184.53	HA20421~B11R16C07	12510	24820	130	31797	28437	13578	47	46	46	58	42	72	100	100	0	2368	1932	951	49	178	178	184	22	11	100	94	0	14.498	16.186	15.804	20.091	2.342	16.287	0.923	138	501	95	33941	30145	3.858	31751	2190	28391	1754	3924256
4	13	7	Hs~Ref:NM_002003.2~uORF:IOH13613~RFU:15466.6	HA20421~B04R07C13	18200	14000	130	31709	28760	14058	48	47	47	51	19	37	100	100	0	4046	3560	1198	33	157	157	158	12	7	100	100	0	8.141	8.438	9.095	7.932	1.9	9.638	0.875	140	451	89	35551	32116	3.025	31662	3889	28713	3403	4026364
12	8	21	Hs~Ref:NM_207285.1~uORF:IOH50066~RFU:9163.67	HA20421~B12R21C08	17230	25780	130	31691	30149	6527	21	216	216	1066	1398	131	100	100	0	3137	2906	715	24	196	196	213	50	23	100	100	0	10.702	11.045	11.241	11.605	1.597	11.041	0.873	140	552	94	34416	32643	3.42	31475	2941	29933	2710	4220809
39	14	14	Hs~Ref:NM_005398.2~uORF:IOH13809~RFU:4171.22	HA20421~B39R14C14	13970	55920	130	31462	30960	21470	69	43	43	75	87	116	100	100	0	1115	1092	546	50	230	230	230	20	8	99	95	0	35.502	35.867	36.413	33.881	1.859	38.614	0.928	132	452	87	32304	31779	5.15	31419	885	30917	862	4086746
16	6	20	Hs~MGC:BC008726.1~N/A~RFU:23001.82	HA20421~B16R20C06	16800	30100	190	30835	36921	24649	66	41	41	57	218	382	100	100	25	3803	3676	1288	35	176	176	192	108	56	99	98	0	8.49	10.537	9.631	8.428	1.916	14.236	0.782	291	721	90	34421	40380	3.086	30794	3627	36880	3500	10744061
9	16	15	Hs~Ref:NP_004374~CAT:P2927~RFU:658.24	HA20421~B09R15C16	5290	24570	110	30777	26830	13816	51	44	44	49	20	40	100	100	0	179	179	11	6	170	170	174	35	20	0	0	0	3414.78	2976.22	2121.33	2599.14	3.474	3458.26	0.105	122	376	90	30742	26795	11.738	30733	9	26786	9	3273255
37	2	8	Hs~Ref:NM_001204.3~N/A~RFU:10336.99	HA20421~B37R08C02	2540	54720	120	30559	28780	11705	40	50	50	62	37	59	100	100	0	2194	2077	973	46	208	208	227	74	32	97	94	0	15.362	15.372	15.993	17.147	1.777	16.221	0.798	139	493	85	32495	30599	3.941	30509	1986	28730	1869	4000487
22	22	15	Hs~N/A:NM_006206.3~CAT:PV3847~RFU:11824.17	HA20421~B22R15C22	11000	38080	130	30488	28756	14679	51	55	55	105	170	161	100	100	0	1858	1745	1025	58	185	185	185	11	5	99	96	0	18.191	18.398	18.238	25.407	2.686	18.415	0.842	145	486	88	32106	30261	4.185	30433	1673	28701	1560	4169688
12	8	20	Hs~Ref:NM_052969.1~uORF:IOH12514~RFU:21770.06	HA20421~B12R20C08	17230	25570	130	30392	29576	7255	24	82	82	450	701	155	100	100	0	2998	2894	848	29	180	180	192	39	20	99	99	0	10.756	10.867	11.106	11.769	1.759	11.228	0.829	144	434	83	33128	32208	3.427	30310	2818	29494	2714	4258925
23	13	15	Hs~Ref:NM_016281.2~CAT:PV3652~RFU:13144.59	HA20421~B23R15C13	13720	38110	110	30129	30756	23190	75	48	48	55	30	54	100	100	9	2058	1618	826	51	189	189	195	27	13	95	93	0	16.095	21.489	21.472	20.839	2.269	25.45	0.872	106	421	94	31950	32137	4.009	30081	1869	30708	1429	3260143
22	3	6	Hs~MGC:BC017344.1~uORF:IOH13180~RFU:27047.9	HA20421~B22R06C03	7190	36300	190	29550	22587	16160	71	44	44	57	53	92	100	100	0	6042	4328	3203	74	194	194	195	18	9	100	100	0	5.045	5.453	5.446	6.213	1.878	5.48	0.919	240	559	91	35354	26677	2.335	29506	5848	22543	4134	5420873
20	3	15	Hs~Ref:NM_000545.3~uORF:IOH44420~RFU:27077.32	HA20421~B20R15C03	16220	33610	160	29502	28794	19628	68	43	43	79	161	203	100	100	0	3063	2482	1308	52	175	175	210	99	47	96	94	0	10.2	12.463	12.128	11.757	2.169	14.472	0.882	195	627	88	32347	31058	3.351	29459	2888	28751	2307	5614754
36	21	15	Hs~Ref:NM_002609.2~CAT:P3082~RFU:324.2	HA20421~B36R15C21	19860	51630	130	29411	28774	21346	74	54	54	501	1112	221	99	99	0	229	401	363	90	206	206	447	573	128	18	3	0	1276.39	147.282	1269.95	468.654	14.951	-336.715	0.016	152	461	69	29380	28915	10.318	29357	23	28720	195	4373637
23	16	15	Hs~Ref:NM_152619.1~CAT:PV4297~RFU:20039.85	HA20421~B23R15C16	14320	38100	140	29398	33746	26928	79	60	60	114	203	178	99	98	25	3632	3432	1737	50	186	186	216	79	36	98	98	0	8.514	10.378	15.422	6.735	5.193	22.572	0.171	154	437	50	32784	36932	3.09	29338	3446	33686	3246	5196837
29	20	16	Hs~MGC:BC054501.1~uORF:IOH28879~RFU:27077.74	HA20421~B29R16C20	6160	47300	130	29243	30764	16943	55	46	46	104	190	182	100	100	0	3153	2654	1374	51	228	228	232	25	10	100	100	0	9.982	12.662	11.013	15.044	2.81	15.114	0.691	145	398	82	32122	33144	3.319	29197	2925	30718	2426	4460810
18	10	16	Hs~Ref:NM_207448.1~uORF:IOH59696~RFU:15968.42	HA20421~B18R16C10	8580	33820	130	29198	31668	18993	59	41	41	43	12	27	100	100	0	5282	4484	2015	44	180	180	180	10	5	100	100	0	5.715	7.348	7.509	8.234	2.668	8.491	0.859	131	540	84	34259	35931	2.515	29157	5102	31627	4304	4148500
18	9	16	Hs~Ref:NM_207448.1~uORF:IOH59696~RFU:15365.49	HA20421~B18R16C09	8390	33820	130	29188	30145	17619	58	39	39	45	22	48	100	100	0	5293	4461	1896	42	181	181	182	11	6	100	100	0	5.702	7.034	7.149	6.885	2.09	8.053	0.882	133	510	88	34261	34386	2.511	29149	5112	30106	4280	4009264
9	15	15	Hs~Ref:NP_004374~CAT:P2927~RFU:711.86	HA20421~B09R15C15	5100	24580	120	28540	25868	13819	53	48	48	59	41	69	100	100	0	182	184	13	7	172	172	172	15	8	34	8	0	2849.2	2151.67	1730.45	2264.24	2.698	2042.27	0.248	125	467	85	28502	25832	11.476	28492	10	25820	12	3233448
16	1	8	Hs~MGC:BC021134.1~uORF:IOH23115~RFU:8665.32	HA20421~B16R08C01	15800	27680	120	28425	26076	10968	42	40	40	45	17	37	100	100	0	1788	1613	512	31	166	166	166	12	7	100	100	0	17.5	17.993	18.43	17.742	1.742	19.605	0.9	111	557	92	30007	27483	4.129	28385	1622	26036	1447	2894393
4	8	16	Hs~Ref:NM_003418.1~uORF:IOH59002~RFU:24537.96	HA20421~B04R16C08	17200	15810	140	27811	23762	9165	38	45	45	48	18	37	100	100	0	5674	4903	2224	45	157	157	158	13	8	100	96	0	5.033	4.997	4.887	6.326	2.696	4.93	0.944	140	577	94	33283	28463	2.331	27766	5517	23717	4746	3326682
13	3	21	Hs~MGC:BC023527.2~uORF:IOH29316~RFU:7303.99	HA20421~B13R21C03	2720	30340	120	27798	28236	19133	67	45	45	54	37	68	100	100	0	1851	1656	733	44	180	180	180	12	6	100	100	0	16.609	19.1	19.682	18.165	1.968	22.488	0.882	121	444	93	29424	29667	4.054	27753	1671	28191	1476	3416609
29	19	16	Hs~MGC:BC054501.1~uORF:IOH28879~RFU:27077.32	HA20421~B29R16C19	5960	47290	140	27498	27334	13351	48	48	48	128	222	173	100	100	0	3908	3109	1525	49	225	225	232	34	14	100	100	0	7.453	9.461	8.428	11.565	3.004	11.334	0.662	145	503	89	31133	30170	2.898	27450	3683	27286	2884	3963383
44	5	16	Hs~Ref:NM_002651.1~CAT:PV5277~RFU:16743.33	HA20421~B44R16C05	16710	60800	110	27487	27421	9052	33	45	45	51	36	70	100	100	0	2746	2417	1097	45	202	202	205	17	8	100	99	0	10.787	12.359	11.378	15.782	2.477	12.473	0.844	113	430	91	29986	29591	3.431	27442	2544	27376	2215	3098574
45	15	14	Hs~Ref:NM_004936.2~uORF:IOH12785~RFU:13706.4	HA20421~B45R14C15	5170	64920	140	27466	23341	15336	65	50	50	64	48	75	100	99	0	5548	4380	2168	49	187	187	274	186	67	95	92	0	5.114	5.555	5.865	5.029	2.64	6.664	0.845	164	537	90	32777	27484	2.354	27416	5361	23291	4193	3827913
6	12	5	Hs~Ref:NM_007194.2~N/A~RFU:15445.05	HA20421~B06R05C12	8950	18070	110	27350	27347	7079	25	71	71	2132	4181	196	100	100	0	5847	5760	633	10	177	177	299	243	81	100	100	0	4.811	4.886	4.964	4.736	1.262	5.352	0.849	80	433	100	32949	32859	2.266	27279	5670	27276	5583	2187778
23	6	8	Hs~Ref:NM_017593.2~N/A~RFU:13489.14	HA20421~B23R08C06	12320	36700	130	27258	28349	12799	45	46	46	53	28	52	100	100	0	3454	2979	1203	40	183	183	183	11	6	100	99	0	8.319	10.123	10.331	11.441	2.097	10.784	0.895	132	469	90	30483	31099	3.056	27212	3271	28303	2796	3742085
45	16	14	Hs~Ref:NM_004936.2~uORF:IOH12785~RFU:13148.03	HA20421~B45R14C16	5370	64920	150	27105	23800	16074	67	47	47	52	21	40	100	100	0	5473	4251	2197	51	182	182	229	137	59	94	92	0	5.114	5.838	6.021	5.19	3.171	6.933	0.852	169	553	91	32349	27822	2.354	27058	5291	23753	4069	4022262
30	22	15	Hs~Ref:NM_004442.3~CAT:PV3625~RFU:13999.11	HA20421~B30R15C22	11040	47100	140	27097	33508	26139	78	48	48	154	506	328	97	97	17	1817	1877	1543	82	233	233	234	20	8	99	98	0	17.076	20.353	24.522	18.441	3.081	23.673	0.62	146	703	83	28633	35104	4.094	27049	1584	33460	1644	4892181
23	17	16	Hs~Ref:NM_000882.1~uORF:IOH29844~RFU:10527.93	HA20421~B23R16C17	14530	38310	120	27040	29342	13263	45	55	55	69	46	66	100	100	0	3062	2809	1111	39	176	176	176	16	9	100	100	0	9.35	11.123	11.332	11.518	1.578	11.851	0.898	112	478	95	29871	31920	3.225	26985	2886	29287	2633	3286306
23	15	15	Hs~Ref:NM_152619.1~CAT:PV4297~RFU:20221.38	HA20421~B23R15C15	14130	38090	140	26714	31253	26898	86	48	48	56	32	57	100	100	21	3472	3511	1753	49	187	187	208	64	30	100	100	0	8.118	9.388	12.001	4.811	6.763	25.876	0.114	153	467	19	29951	34529	3.021	26666	3285	31205	3324	4781772
47	21	7	Hs~Ref:NM_002752.3~N/A~RFU:6797.36	HA20421~B47R07C21	15410	63470	110	26580	22663	7984	35	63	63	418	971	232	100	100	0	2025	1897	531	27	192	192	312	381	122	98	91	0	14.466	13.255	12.562	12.474	1.588	15.911	0.76	80	377	100	28350	24305	3.855	26517	1833	22600	1705	1813017
4	14	7	Hs~Ref:NM_002003.2~uORF:IOH13613~RFU:15944.39	HA20421~B04R07C14	18400	14000	130	26349	26241	14446	55	47	47	53	22	41	100	100	0	4007	3491	1185	33	158	158	162	38	23	100	99	0	6.833	7.859	7.931	6.979	1.808	9.181	0.89	144	472	87	30151	29527	2.773	26302	3849	26194	3333	3778676
47	22	7	Hs~Ref:NM_002752.3~N/A~RFU:6799.69	HA20421~B47R07C22	15610	63470	110	26307	24371	8793	36	53	53	239	996	416	98	98	0	1928	1804	686	38	191	191	208	89	42	98	96	0	15.115	15.076	14.039	15.728	1.881	16.392	0.814	80	415	100	27991	25931	3.918	26254	1737	24318	1613	1949652
7	13	15	Hs~Ref:NM_002742.1~CAT:PV3791~RFU:15568.95	HA20421~B07R15C13	13690	20110	120	26305	23865	11808	49	45	45	52	24	46	100	100	0	2931	2500	1275	51	170	170	171	9	5	100	97	0	9.511	10.223	10.145	12.899	2.581	10.515	0.892	120	490	94	29021	26150	3.25	26260	2761	23820	2330	2863790
4	7	16	Hs~Ref:NM_003418.1~uORF:IOH59002~RFU:21335.99	HA20421~B04R16C07	17000	15810	130	26204	24261	8815	36	44	44	48	17	35	100	100	0	5501	5000	2277	45	158	158	160	11	6	100	99	0	4.896	5.001	4.877	6.571	2.764	4.93	0.929	132	513	92	31503	29059	2.292	26160	5343	24217	4842	3202432
13	4	21	Hs~MGC:BC023527.2~uORF:IOH29316~RFU:7456.49	HA20421~B13R21C04	2920	30340	120	25574	29596	20310	68	41	41	48	31	64	100	100	0	1721	1576	811	51	182	182	183	11	6	100	100	0	16.591	21.202	23.602	22.84	2.064	24.151	0.876	124	433	92	27072	30949	4.052	25533	1539	29555	1394	3669866
29	8	7	Hs~MGC:BC021278.1~uORF:IOH14591~RFU:2404.28	HA20421~B29R07C08	3760	45490	120	25452	28927	21993	76	38	38	42	12	28	100	100	0	853	844	297	35	210	210	210	14	6	100	100	0	39.524	45.566	41.77	33.532	2.137	57.633	0.865	120	493	82	26057	29523	5.305	25414	643	28889	634	3471290
34	8	16	Hs~Ref:NM_153330.2~uORF:IOH22558~RFU:21039.7	HA20421~B34R16C08	8240	51840	170	25446	33945	28106	82	43	43	109	398	365	100	99	34	1359	3840	4635	120	232	232	230	25	10	81	77	0	22.54	9.396	9.84	18.592	8.22	10.261	0.478	199	548	70	26530	37510	4.494	25403	1127	33902	3608	6755142
29	18	17	Hs~Ref:NM_024348.2~uORF:IOH3523~RFU:6289.66	HA20421~B29R17C18	5760	47500	100	25113	27558	13052	47	58	58	325	876	269	100	100	0	2444	2237	877	39	230	230	277	151	54	97	95	0	11.317	13.702	14.026	14.639	2.245	18.087	0.568	84	312	86	27269	29507	3.5	25055	2214	27500	2007	2314857
12	9	19	Hs~Ref:NM_006775.1~uORF:IOH10720~RFU:6738.82	HA20421~B12R19C09	17410	25370	130	25085	22853	8755	38	53	53	63	40	63	100	100	0	728	662	216	32	173	173	173	13	7	97	96	0	45.103	46.626	44.709	53.098	2.094	48.387	0.879	134	432	94	25587	23289	5.495	25032	555	22800	489	3062318
12	9	20	Hs~MGC:BC007991.2~uORF:IOH6109~RFU:14183.11	HA20421~B12R20C09	17420	25570	130	24940	24043	9601	39	49	49	156	391	250	100	100	0	4034	3471	1174	33	181	181	210	65	30	100	100	0	6.46	7.293	7.094	7.664	2.113	8.653	0.745	132	534	89	28744	27284	2.692	24891	3853	23994	3290	3173695
23	5	8	Hs~Ref:NM_017593.2~N/A~RFU:13389.28	HA20421~B23R08C05	12120	36700	130	24794	25304	11012	43	44	44	51	22	43	100	100	0	3225	2814	1186	42	181	181	181	12	6	100	99	0	8.131	9.594	9.131	11.53	2.486	10.343	0.84	134	478	95	27794	27893	3.023	24750	3044	25260	2633	3390721
42	20	15	Hs~N/A:NM_004333.1~CAT:PV3849~RFU:15639.79	HA20421~B42R15C20	10680	60620	120	24630	23887	14036	58	49	49	63	53	84	100	100	0	3303	2796	1192	42	194	194	197	34	17	98	98	0	7.906	9.161	9.569	9.337	2.245	10.478	0.874	117	578	92	27690	26440	2.983	24581	3109	23838	2602	2794806
42	19	15	Hs~N/A:NM_004333.1~CAT:PV3849~RFU:15730.31	HA20421~B42R15C19	10480	60620	120	24543	22763	13361	58	45	45	54	33	61	100	100	0	3178	2646	1149	43	195	195	194	11	5	100	100	0	8.213	9.269	9.782	9.523	2.396	10.684	0.851	120	478	88	27481	25169	3.038	24498	2983	22718	2451	2731516
18	7	16	Hs~Ref:NM_001025239.1~uORF:IOH58999~RFU:11581.72	HA20421~B18R16C07	7980	33820	130	24395	23459	12007	51	41	41	43	11	25	100	100	0	3730	3537	1255	35	180	180	186	48	25	100	100	0	6.86	6.976	7.035	6.37	1.675	7.749	0.924	131	583	92	27904	26775	2.778	24354	3550	23418	3357	3073180
20	4	15	Hs~Ref:NM_000545.3~uORF:IOH44420~RFU:27078.57	HA20421~B20R15C04	16430	33620	160	24393	30007	24469	81	44	44	83	162	195	100	100	0	2272	2370	1351	57	170	170	186	82	44	98	97	0	11.584	13.62	12.274	9.936	2.456	17.117	0.834	239	657	84	26451	32163	3.534	24349	2102	29963	2200	7171685
26	21	16	Hs~Ref:NM_152485.2~uORF:IOH26147~RFU:23128.35	HA20421~B26R16C21	10840	42810	130	24250	27409	13028	47	320	320	1250	1950	156	100	100	0	4507	3823	1279	33	224	224	384	226	58	99	98	0	5.587	7.527	7.375	7.746	2.118	10.275	0.58	152	408	85	28213	30688	2.482	23930	4283	27089	3599	4166226
32	16	16	Hs~Ref:NM_001005373.1~uORF:IOH55653~RFU:27057.02	HA20421~B32R16C16	18850	47310	160	23568	26774	12155	45	100	100	1047	2113	201	100	100	0	6294	5704	1528	26	197	197	251	152	60	98	98	0	3.849	4.844	4.501	4.78	1.872	5.95	0.737	242	507	69	29565	32181	1.945	23468	6097	26674	5507	6479333
9	21	1	AlexaAntiMouseAb~N/A	HA20421~B09R01C21	6300	21770	100	23558	18977	7571	39	41	41	46	17	36	100	100	0	5608	4731	1852	39	163	163	166	16	9	100	100	0	4.319	4.145	4.269	4.355	2.054	4.3	0.912	92	455	86	28962	23504	2.111	23517	5445	18936	4568	1745865
12	9	17	Hs~MGC:NM_175738.2~uORF:IOH27507~RFU:14529.44	HA20421~B12R17C09	17410	25000	130	23501	22506	4673	20	666	666	1670	2732	163	100	100	0	6633	6134	1332	21	192	192	216	116	53	100	100	0	3.545	3.676	3.748	3.755	1.441	3.717	0.862	134	495	86	29276	27782	1.826	22835	6441	21840	5942	3015738
39	12	14	Hs~MGC:XM_376503.1~uORF:IOH11280~RFU:6443.65	HA20421~B39R14C12	13570	55910	130	23495	20979	12538	59	39	39	44	18	40	100	100	0	1541	1410	742	52	226	226	227	13	5	100	100	0	17.837	17.686	18.277	18.699	1.568	18.008	0.937	127	442	95	24771	22124	4.157	23456	1315	20940	1184	2664324
18	8	16	Hs~Ref:NM_001025239.1~uORF:IOH58999~RFU:11989.89	HA20421~B18R16C08	8190	33820	130	23387	23315	13643	58	41	41	49	25	51	100	100	0	3924	3550	1353	38	184	184	189	50	26	100	99	0	6.242	6.914	7.079	6.519	1.948	8.115	0.872	131	571	96	27086	26640	2.642	23346	3740	23274	3366	3054220
14	6	10	Hs~Ref:NM_020664.3~uORF:IOH9825~RFU:27086.03	HA20421~B14R10C06	7790	28070	140	23361	23957	15003	62	48	48	90	190	211	100	100	0	5179	4055	1928	47	177	177	177	12	6	98	98	0	4.661	6.165	5.864	7.033	2.929	7.455	0.78	165	550	91	28315	27787	2.221	23313	5002	23909	3878	3952837
42	2	15	Hs~MGC:BC012924.1~uORF:IOH11017~RFU:25555.66	HA20421~B42R15C02	7080	60620	110	23315	22290	7583	34	84	84	671	1631	243	100	98	0	5832	5708	915	16	218	218	277	229	82	100	100	0	4.138	4.045	4.077	3.814	1.47	4.644	0.751	80	393	100	28845	27696	2.049	23231	5614	22206	5490	1783180
7	14	15	Hs~Ref:NM_002742.1~CAT:PV3791~RFU:16160.77	HA20421~B07R15C14	13890	20110	120	23262	20898	7529	36	42	42	45	14	31	100	100	0	2669	2405	1158	48	166	166	167	10	5	100	98	0	9.277	9.315	9.031	11.842	2.418	9.168	0.888	121	506	93	25723	23095	3.214	23220	2503	20856	2239	2528614
29	22	15	Hs~Ref:NM_005246.1~CAT:PV3806~RFU:20930.78	HA20421~B29R15C22	6570	47100	120	23198	28416	21191	74	45	45	55	48	87	100	100	1	4612	3695	1645	44	230	230	249	232	93	92	89	0	5.284	8.188	9.302	7.49	2.636	10.99	0.747	123	551	96	27535	31836	2.402	23153	4382	28371	3465	3495223
26	22	17	Hs~Ref:NM_001008723.1~uORF:IOH43999~RFU:5903.36	HA20421~B26R17C22	11030	43020	110	22967	20499	5431	26	63	63	1433	2740	191	100	100	0	1371	1270	410	32	208	208	312	207	66	95	88	0	19.694	19.243	18.865	20.94	1.474	18.99	0.908	80	514	100	24067	21498	4.3	22904	1163	20436	1062	1639926
6	1	1	AlexaAntiMouseAb~N/A	HA20421~B06R01C01	6760	17270	100	22951	20570	6272	30	44	44	52	28	53	100	100	0	5331	4492	1563	34	167	167	168	11	6	100	100	0	4.436	4.746	4.577	5.088	1.9	4.838	0.908	90	486	94	28071	24851	2.149	22907	5164	20526	4325	1851322
23	6	9	Hs~Ref:NM_001722.2~uORF:IOH4103~RFU:10297.53	HA20421~B23R09C06	12320	36900	120	22931	20601	6503	31	41	41	55	39	70	100	100	0	1194	1140	540	47	180	180	180	10	5	100	100	0	22.574	21.417	21.631	27.36	2.001	20.541	0.856	122	500	93	23904	21520	4.497	22890	1014	20560	960	2513366
27	13	3	Hs~Ref:NM_006038.1~uORF:IOH14383~RFU:27062.41	HA20421~B27R03C13	13700	40190	130	22930	19818	7873	39	42	42	57	47	82	100	100	0	6634	5411	2355	43	195	195	198	16	8	100	100	0	3.555	3.791	3.673	4.55	2.242	3.806	0.93	153	483	91	29327	24992	1.83	22888	6439	19776	5216	3032128
29	7	7	Hs~MGC:BC021278.1~uORF:IOH14591~RFU:2427.07	HA20421~B29R07C07	3560	45500	120	22828	27180	20038	73	38	38	42	14	33	100	100	0	897	877	293	33	209	209	210	14	6	100	100	0	33.125	40.632	38.195	31.042	1.915	52.002	0.858	116	475	96	23478	27810	5.05	22790	688	27142	668	3152897
1	21	1	AlexaAntiMouseAb~N/A	HA20421~B01R01C21	6280	12820	110	22773	19952	6353	31	47	47	55	37	67	100	100	0	5575	4453	2008	45	158	158	157	11	7	100	100	0	4.195	4.634	4.318	5.651	2.073	4.463	0.932	103	484	80	28143	24200	2.069	22726	5417	19905	4295	2055102
39	9	7	Hs~Ref:NM_005565.2~uORF:IOH11014~RFU:18352.93	HA20421~B39R07C09	12960	54520	120	22359	22830	12705	55	42	42	54	37	68	100	100	0	1324	1184	370	31	240	240	250	111	44	97	93	0	20.588	24.14	23.194	23.416	1.81	29.164	0.8	115	492	94	23401	23732	4.364	22317	1084	22788	944	2625454
12	7	21	Hs~Ref:NM_207285.1~uORF:IOH50066~RFU:12129.19	HA20421~B12R21C07	17030	25780	140	22323	22327	6849	30	265	265	1040	1453	139	100	100	0	3048	2703	845	31	185	185	198	39	19	100	100	0	7.705	8.762	8.653	9.445	1.6	8.754	0.911	147	555	91	24921	24580	2.946	22058	2863	22062	2518	3282133
2	2	1	AlexaAntiMouseAb~N/A	HA20421~B02R01C02	7010	12800	110	22121	17627	7578	42	48	48	54	21	38	100	100	0	5393	4453	1687	37	159	159	161	17	10	100	100	0	4.217	4.094	4.254	4.158	1.824	4.307	0.928	100	527	83	27307	21873	2.076	22073	5234	17579	4294	1762729
11	21	1	AlexaAntiMouseAb~N/A	HA20421~B11R01C21	15340	21790	110	21880	18449	7528	40	42	42	47	18	38	100	100	0	5396	4558	1697	37	164	164	165	11	6	100	100	0	4.174	4.189	4.274	4.274	2.037	4.42	0.903	93	518	96	27070	22801	2.061	21838	5232	18407	4394	1715767
31	22	15	Hs~Ref:NM_001007156.1~CAT:PV3617~RFU:1057.1	HA20421~B31R15C22	15550	47140	110	21863	20829	8758	42	47	47	55	38	69	100	100	0	232	229	15	6	208	208	209	13	6	66	33	0	909	989.619	1018.69	1017.09	2.169	1178.72	0.284	108	468	90	21840	20803	9.828	21816	24	20782	21	2249543
1	22	1	AlexaAntiMouseAb~N/A	HA20421~B01R01C22	6480	12820	110	21810	19015	5813	30	47	47	61	61	100	100	100	0	5399	4250	2164	50	156	156	156	10	6	100	100	0	4.151	4.633	4.081	6.433	2.68	4.442	0.868	105	482	83	27006	23062	2.053	21763	5243	18968	4094	1996590
7	21	1	AlexaAntiMouseAb~N/A	HA20421~B07R01C21	15300	17300	110	21762	17311	7205	41	43	43	47	16	34	100	100	0	5204	4230	1825	43	165	165	168	14	8	100	100	0	4.31	4.248	4.231	4.652	2.382	4.409	0.893	96	498	89	26758	21333	2.108	21719	5039	17268	4065	1661886
6	21	7	Hs~Ref:NM_002401.2~N/A~RFU:27059.92	HA20421~B06R07C21	10750	18480	130	21751	20446	5576	27	44	44	51	29	56	100	100	0	5624	4736	1840	38	167	167	167	9	5	100	100	0	3.978	4.465	4.177	5.275	2.067	4.381	0.92	149	482	96	27164	24971	1.992	21707	5457	20402	4569	3046473
5	22	1	AlexaAntiMouseAb~N/A	HA20421~B05R01C22	6510	17310	120	21426	17431	8047	46	44	44	52	25	48	100	100	0	5221	3940	2037	51	167	167	167	11	6	100	100	0	4.231	4.608	4.407	5.659	2.356	4.613	0.916	105	638	90	26436	21160	2.081	21382	5054	17387	3773	1830225
5	1	1	AlexaAntiMouseAb~N/A	HA20421~B05R01C01	2310	17310	100	21415	19035	5513	28	52	52	62	36	58	100	100	0	5222	4876	1082	22	160	160	161	12	7	100	100	0	4.22	4.025	4.214	3.978	1.361	4.19	0.952	87	507	91	26425	23699	2.077	21363	5062	18983	4716	1656024
6	22	7	Hs~Ref:NM_002401.2~N/A~RFU:27081.47	HA20421~B06R07C22	10950	18490	140	21229	19784	7015	35	43	43	48	21	43	100	100	0	5928	5000	1947	38	164	164	165	10	6	100	100	0	3.676	4.082	3.979	4.905	2.371	4.211	0.889	146	709	96	26950	24577	1.878	21186	5764	19741	4836	2888514
29	20	17	Hs~MGC:BC000884.1~uORF:IOH3230~RFU:9462.78	HA20421~B29R17C20	6150	47490	110	21229	20910	13071	62	49	49	105	186	177	100	100	0	3221	3068	1137	37	234	234	238	31	13	100	100	0	7.091	7.361	7.286	6.284	2.684	10.03	0.673	109	408	94	24167	23695	2.826	21180	2987	20861	2834	2279229
12	8	18	Hs~MGC:BC073959.1~uORF:IOH62556~RFU:5255.08	HA20421~B12R18C08	17210	25210	130	21192	21848	11090	50	53	53	378	1616	427	100	100	0	1067	957	346	36	172	172	196	125	63	91	89	0	23.619	27.764	27.837	28.209	1.802	30.043	0.907	121	502	79	22034	22580	4.562	21139	895	21795	785	2643568
31	6	7	Hs~Ref:NM_001744.2~uORF:IOH13877~RFU:15674.62	HA20421~B31R07C06	12340	45540	130	21135	18921	8928	47	39	39	44	18	40	100	100	0	2085	1877	649	34	209	209	209	14	6	100	99	0	11.245	11.32	12.035	11.385	1.903	12.562	0.879	131	524	96	22972	20550	3.491	21096	1876	18882	1668	2478595
10	1	1	AlexaAntiMouseAb~N/A	HA20421~B10R01C01	6820	21750	110	21088	18069	5906	32	40	40	45	17	37	100	100	0	5430	4536	1732	38	170	170	172	16	9	100	100	0	4.002	4.129	3.989	4.483	1.713	4.116	0.942	89	581	88	26308	22395	2.001	21048	5260	18029	4366	1608176
44	6	16	Hs~Ref:NM_002651.1~CAT:PV5277~RFU:16741.67	HA20421~B44R16C06	16910	60810	130	21062	19229	10828	56	48	48	56	30	53	100	100	0	2637	2387	1541	64	203	203	204	14	6	98	96	0	8.634	8.783	9.261	12.828	3.787	10.139	0.636	131	517	91	23448	21365	3.11	21014	2434	19181	2184	2518948
25	1	16	Hs~Ref:NM_003215.1~CAT:PV3269~RFU:753.19	HA20421~B25R16C01	2310	42800	140	20865	16426	9608	58	48	48	73	73	100	100	100	0	240	239	21	8	200	200	202	21	10	84	47	0	520.425	419.949	385.873	347.603	2.2	484.266	0.602	151	686	95	20857	16417	9.024	20817	40	16378	39	2480392
9	22	1	AlexaAntiMouseAb~N/A	HA20421~B09R01C22	6500	21760	100	20827	18392	5971	32	43	43	47	16	34	100	100	0	5488	4384	2017	46	168	168	170	15	8	100	100	0	3.907	4.352	4.117	5.302	2.097	4.263	0.898	89	466	84	26104	22565	1.966	20784	5320	18349	4216	1636844
11	22	1	AlexaAntiMouseAb~N/A	HA20421~B11R01C22	15530	21800	110	20807	17124	6898	40	43	43	48	22	45	100	100	0	5273	4459	1550	34	162	162	163	12	7	100	100	0	4.063	3.975	4.112	3.809	1.783	4.191	0.925	95	494	79	25875	21378	2.022	20764	5111	17081	4297	1626797
25	21	1	AlexaAntiMouseAb~N/A	HA20421~B25R01C21	6320	39790	110	20632	17914	7159	39	37	37	43	18	41	100	100	0	5819	4921	1817	36	205	205	205	12	5	100	100	0	3.669	3.791	3.839	3.827	1.711	3.95	0.922	94	528	95	26209	22593	1.875	20595	5614	17877	4716	1683913
39	10	7	Hs~Ref:NM_005565.2~uORF:IOH11014~RFU:18449.35	HA20421~B39R07C10	13160	54510	120	20533	23332	10847	46	46	46	54	31	57	100	100	0	1293	1157	343	29	242	242	242	89	36	96	91	0	19.493	25.449	23.705	26.963	1.758	28.291	0.872	115	493	95	21538	24201	4.285	20487	1051	23286	915	2683213
48	20	15	Hs~Ref:NM_005157.2~CAT:PV3866~RFU:769.93	HA20421~B48R15C20	19710	65060	130	20474	19023	7152	37	49	49	392	1240	316	100	100	0	198	198	19	9	169	169	500	1155	231	0	0	0	704.31	654.276	540.8	653.136	2.115	721.31	0.297	117	594	84	20454	19003	9.46	20425	29	18974	29	2225733
13	22	1	AlexaAntiMouseAb~N/A	HA20421~B13R01C22	6530	26310	110	20471	16999	7524	44	41	41	48	23	47	100	100	0	5264	4090	1992	48	173	173	176	20	11	100	100	0	4.013	4.329	4.213	4.884	2.093	4.375	0.915	100	518	92	25521	20875	2.005	20430	5091	16958	3917	1699893
5	2	1	AlexaAntiMouseAb~N/A	HA20421~B05R01C02	2510	17310	110	20446	17382	6470	37	47	47	60	39	65	100	100	0	5070	4327	1510	34	163	163	162	11	6	100	100	0	4.157	4.163	4.213	4.255	1.633	4.304	0.939	97	505	87	25306	21499	2.056	20399	4907	17335	4164	1686083
3	21	1	AlexaAntiMouseAb~N/A	HA20421~B03R01C21	15310	12800	100	20438	17737	5931	33	47	47	51	19	37	100	100	0	5409	4588	1548	33	154	154	153	10	6	100	100	0	3.88	3.99	4.035	4.179	1.999	4.188	0.881	89	450	95	25646	22124	1.956	20391	5255	17690	4434	1578553
27	22	1	AlexaAntiMouseAb~N/A	HA20421~B27R01C22	15510	39780	110	20280	15802	7406	46	38	38	43	17	39	100	100	0	4968	3821	2046	53	181	181	184	18	9	100	100	0	4.229	4.331	4.166	5.316	2.359	4.377	0.884	92	548	93	25029	19404	2.08	20242	4787	15764	3640	1453798
2	1	1	AlexaAntiMouseAb~N/A	HA20421~B02R01C01	6800	12800	110	20177	16303	7148	43	47	47	61	51	83	100	100	0	5143	4334	1607	37	159	159	160	12	7	100	100	0	4.039	3.894	4.049	3.97	2.013	4.165	0.91	103	564	93	25114	20431	2.014	20130	4984	16256	4175	1679166
9	1	1	AlexaAntiMouseAb~N/A	HA20421~B09R01C01	2300	21770	110	20117	16816	6447	38	47	47	60	42	70	100	100	0	4983	4330	1598	36	166	166	168	14	8	100	100	0	4.166	4.027	4.064	4.188	1.934	4.227	0.897	89	569	92	24887	20933	2.059	20070	4817	16769	4164	1496648
7	22	1	AlexaAntiMouseAb~N/A	HA20421~B07R01C22	15510	17300	110	20099	16630	6320	38	41	41	47	23	48	100	100	0	5070	4181	1708	40	165	165	165	10	6	100	100	0	4.089	4.131	4.075	4.642	1.998	4.204	0.917	92	531	85	24963	20605	2.032	20058	4905	16589	4016	1529973
12	8	19	Hs~MGC:BC000478.2~uORF:IOH3690~RFU:9779.6	HA20421~B12R19C08	17220	25370	130	20093	19936	5966	29	48	48	63	43	68	100	100	0	1520	1349	495	36	172	172	174	13	7	100	99	0	14.87	16.897	16.403	19.518	1.876	17.057	0.871	132	392	87	21393	21065	3.894	20045	1348	19888	1177	2631576
10	2	1	AlexaAntiMouseAb~N/A	HA20421~B10R01C02	7030	21750	110	20031	17162	5952	34	42	42	48	26	54	100	100	0	5217	4290	1739	40	168	168	168	10	5	100	100	0	3.959	4.153	4.053	4.794	1.939	4.166	0.922	94	537	90	25038	21242	1.985	19989	5049	17120	4122	1613194
31	21	15	Hs~Ref:NM_001007156.1~CAT:PV3617~RFU:1026.71	HA20421~B31R15C21	15350	47140	130	20029	20036	13386	66	49	49	62	52	83	100	100	0	229	239	53	22	211	211	259	225	86	2	0	0	1110	713.821	838.875	842.728	2.629	-2272.76	0.001	137	357	95	19998	20015	10.116	19980	18	19987	28	2744987
5	21	1	AlexaAntiMouseAb~N/A	HA20421~B05R01C21	6310	17310	110	19980	16861	6896	40	43	43	47	16	34	100	100	0	4820	3952	1859	47	163	163	164	12	7	100	100	0	4.281	4.439	4.138	5.054	2.214	4.473	0.902	103	487	83	24594	20607	2.098	19937	4657	16818	3789	1736638
7	1	1	AlexaAntiMouseAb~N/A	HA20421~B07R01C01	11300	17300	120	19960	15905	7069	44	45	45	54	33	61	100	100	0	5207	4138	1885	45	167	167	169	14	8	100	100	0	3.951	3.994	3.983	4.452	1.932	4.042	0.944	107	685	95	24955	19831	1.982	19915	5040	15860	3971	1701807
10	21	1	AlexaAntiMouseAb~N/A	HA20421~B10R01C21	10830	21760	120	19937	16002	7864	49	43	43	51	26	50	100	100	0	5161	4150	1897	45	167	167	169	19	11	100	99	0	3.984	4.007	4.08	4.382	2.519	4.24	0.898	103	587	89	24888	19942	1.994	19894	4994	15959	3983	1648173
17	21	1	AlexaAntiMouseAb~N/A	HA20421~B17R01C21	6280	30810	100	19897	17550	6910	39	43	43	50	22	44	100	100	0	5721	4870	1798	36	171	171	176	19	10	100	100	0	3.577	3.726	3.849	3.91	1.938	3.911	0.912	91	471	91	25404	22206	1.839	19854	5550	17507	4699	1597019
23	5	9	Hs~Ref:NM_001722.2~uORF:IOH4103~RFU:10550.31	HA20421~B23R09C05	12120	36900	120	19877	18590	6599	35	39	39	45	26	57	100	100	0	1294	1156	545	47	179	179	179	10	5	100	99	0	17.792	18.988	18.119	24.072	1.98	18.038	0.905	118	505	91	20953	19528	4.153	19838	1115	18551	977	2193654
34	7	9	Hs~Ref:NM_138416.1~uORF:IOH40625~RFU:7356.23	HA20421~B34R09C07	8030	50410	120	19803	22002	16016	72	38	38	54	57	105	100	100	0	1591	1459	704	48	240	240	260	59	22	99	92	0	14.63	18.018	18.405	15.237	1.927	20.684	0.923	119	495	84	21116	23183	3.871	19765	1351	21964	1219	2618213
1	1	1	AlexaAntiMouseAb~N/A	HA20421~B01R01C01	2280	12820	110	19655	17139	5732	33	44	44	59	59	100	100	100	0	4682	3966	1595	40	169	169	169	12	7	100	100	0	4.345	4.502	4.449	5.082	1.957	4.524	0.905	111	514	87	24124	20892	2.12	19611	4513	17095	3797	1902407
21	22	1	AlexaAntiMouseAb~N/A	HA20421~B21R01C22	6510	35310	100	19616	17065	5493	32	41	41	49	21	42	100	100	0	5385	4559	1678	36	186	186	189	17	8	100	100	0	3.765	3.893	3.822	4.255	2.234	4.017	0.877	94	455	89	24774	21397	1.913	19575	5199	17024	4373	1604101
17	22	1	AlexaAntiMouseAb~N/A	HA20421~B17R01C22	6490	30810	110	19616	16051	8266	51	42	42	48	22	45	100	100	0	5695	4498	2024	44	170	170	172	17	9	100	100	0	3.543	3.699	3.799	3.564	1.96	3.925	0.926	98	530	86	25099	20337	1.825	19574	5525	16009	4328	1573035
17	1	1	AlexaAntiMouseAb~N/A	HA20421~B17R01C01	2280	30810	110	19595	15888	7381	46	46	46	53	28	52	100	100	0	5301	4186	1901	45	182	182	182	16	8	100	100	0	3.819	3.957	3.902	4.264	1.983	4.111	0.913	100	560	92	24668	19846	1.933	19549	5119	15842	4004	1588805
33	21	1	AlexaAntiMouseAb~N/A	HA20421~B33R01C21	6320	48780	110	19585	15695	7549	48	41	41	45	16	35	100	100	0	5860	4356	2386	54	231	231	233	21	9	100	100	0	3.472	3.795	3.692	4.958	2.604	3.824	0.879	101	518	84	25173	19779	1.796	19544	5629	15654	4125	1585203
21	21	1	AlexaAntiMouseAb~N/A	HA20421~B21R01C21	6310	35310	110	19533	16062	7188	44	40	40	46	22	47	100	100	0	5553	4304	1937	45	187	187	188	15	7	100	100	0	3.633	3.892	3.843	4.083	2.06	4.029	0.903	100	499	82	24859	20139	1.861	19493	5366	16022	4117	1606179
21	2	1	AlexaAntiMouseAb~N/A	HA20421~B21R01C02	2500	35310	110	19525	16096	6380	39	45	45	49	16	32	100	100	0	4882	3953	1931	48	186	186	189	16	8	100	100	0	4.148	4.261	4.16	5.479	2.401	4.226	0.9	104	491	94	24176	19818	2.052	19480	4696	16051	3767	1673975
14	9	12	Hs~Ref:NM_005710.1~uORF:IOH13398~RFU:27045.42	HA20421~B14R12C09	8390	28470	150	19505	20932	11892	56	46	46	65	65	100	100	100	0	3482	2785	1227	44	185	185	191	21	10	98	97	0	5.902	8.033	8.122	9.178	2.715	9.915	0.725	179	562	95	22756	23486	2.561	19459	3297	20886	2600	3746809
4	1	1	AlexaAntiMouseAb~N/A	HA20421~B04R01C01	15800	12800	110	19499	17068	5290	30	46	46	57	32	56	100	100	0	5189	4577	1373	29	158	158	158	11	6	100	100	0	3.867	3.852	3.912	3.997	1.771	3.982	0.908	97	579	89	24484	21441	1.951	19453	5031	17022	4419	1655594
3	22	1	AlexaAntiMouseAb~N/A	HA20421~B03R01C22	15510	12800	120	19480	15953	6952	43	47	47	52	24	46	100	100	0	5199	4147	1806	43	154	154	154	10	6	100	100	0	3.852	3.983	4.027	4.589	2.818	4.251	0.848	97	657	92	24478	19899	1.946	19433	5045	15906	3993	1547414
29	21	15	Hs~Ref:NM_005246.1~CAT:PV3806~RFU:20537.71	HA20421~B29R15C21	6360	47090	120	19434	27189	21518	79	43	43	48	16	33	100	100	4	4823	3974	1614	40	224	224	224	13	5	100	100	0	4.216	7.239	6.831	5.759	2.976	10.419	0.714	122	431	92	23990	30896	2.076	19391	4599	27146	3750	3317034
26	1	1	AlexaAntiMouseAb~N/A	HA20421~B26R01C01	6840	39820	120	19409	15910	6765	42	39	39	44	18	40	100	100	0	5390	4149	2086	50	205	205	206	17	8	100	100	0	3.736	4.024	3.836	4.879	2.26	3.986	0.915	105	692	92	24555	19815	1.901	19370	5185	15871	3944	1670580
13	21	1	AlexaAntiMouseAb~N/A	HA20421~B13R01C21	6330	26310	100	19390	17041	6807	39	42	42	52	32	61	100	100	0	5293	4362	1809	41	174	174	178	24	13	100	100	0	3.78	4.059	4.116	4.372	1.954	4.191	0.905	93	472	93	24467	21187	1.918	19348	5119	16999	4188	1584826
37	21	1	AlexaAntiMouseAb~N/A	HA20421~B37R01C21	6350	53310	110	19389	16000	7342	45	40	40	43	14	32	100	100	0	5732	4674	1972	42	220	220	222	17	7	100	100	0	3.51	3.583	3.855	3.87	2.728	3.909	0.834	95	539	85	24861	20414	1.812	19349	5512	15960	4454	1520046
13	2	11	AlexaAntiMouseAb~N/A	HA20421~B13R11C02	2520	28330	110	19344	16615	5540	33	44	44	55	46	83	100	100	0	4804	3954	1605	40	173	173	177	16	9	100	100	0	4.168	4.383	4.138	5.123	1.939	4.391	0.915	95	456	94	23931	20352	2.059	19300	4631	16571	3781	1578410
11	1	1	AlexaAntiMouseAb~N/A	HA20421~B11R01C01	11310	21790	100	19343	17491	5055	28	43	43	49	20	40	100	100	0	4926	4356	1620	37	171	171	172	14	8	100	100	0	4.059	4.169	3.936	4.669	2.138	4.236	0.872	91	489	87	24055	21633	2.021	19300	4755	17448	4185	1591722
22	1	1	AlexaAntiMouseAb~N/A	HA20421~B22R01C01	6800	35270	110	19150	15434	6860	44	37	37	47	27	57	100	100	0	5300	3984	1940	48	181	181	183	18	9	100	100	0	3.734	4.049	3.924	4.799	1.995	4.042	0.936	96	562	78	24232	19200	1.901	19113	5119	15397	3803	1481655
19	2	1	AlexaAntiMouseAb~N/A	HA20421~B19R01C02	11500	30810	100	19150	16966	5882	34	43	43	47	15	31	100	100	0	5269	4460	1784	40	184	184	186	16	8	100	100	0	3.758	3.958	3.85	4.497	1.948	3.972	0.925	87	474	94	24192	21199	1.91	19107	5085	16923	4276	1476085
3	1	1	AlexaAntiMouseAb~N/A	HA20421~B03R01C01	11300	12800	110	19121	16766	5969	35	46	46	52	25	48	100	100	0	5174	4448	1583	35	161	161	162	10	6	100	100	0	3.805	3.9	3.884	4.025	1.949	4.09	0.881	101	549	93	24088	21007	1.928	19075	5013	16720	4287	1693352
26	2	1	AlexaAntiMouseAb~N/A	HA20421~B26R01C02	7040	39820	110	19117	15753	7151	45	41	41	45	16	35	100	100	0	5408	4141	2081	50	205	205	207	15	7	100	100	0	3.666	3.992	3.874	4.65	2.312	4.019	0.907	102	502	87	24279	19648	1.874	19076	5203	15712	3936	1606794
18	1	1	AlexaAntiMouseAb~N/A	HA20421~B18R01C01	6800	30800	100	18976	15452	6894	44	43	43	50	24	48	100	100	0	5423	4329	1886	43	174	174	178	18	10	100	100	0	3.607	3.709	3.768	4.069	1.958	3.875	0.907	99	490	92	24182	19564	1.851	18933	5249	15409	4155	1529715
8	1	1	AlexaAntiMouseAb~N/A	HA20421~B08R01C01	15790	17270	110	18951	16794	4373	26	44	44	48	18	37	100	100	0	4703	4038	1410	34	162	162	162	12	7	100	100	0	4.164	4.321	4.159	4.968	2.112	4.362	0.889	93	569	92	23448	20626	2.058	18907	4541	16750	3876	1561830
22	21	15	Hs~N/A:NM_006206.3~CAT:PV3847~RFU:11486.2	HA20421~B22R15C21	10810	38080	130	18909	24915	17830	71	54	54	97	135	139	100	100	0	2142	1951	927	47	185	185	184	11	5	100	98	0	9.635	14.078	12.682	13.792	2.245	18.001	0.754	127	422	90	20812	26627	3.268	18855	1957	24861	1766	3164156
6	2	1	AlexaAntiMouseAb~N/A	HA20421~B06R01C02	6960	17270	110	18899	16562	5246	31	41	41	47	25	53	100	100	0	4822	4024	1565	38	164	164	164	10	6	100	100	0	4.049	4.28	4.059	4.652	1.842	4.296	0.912	93	509	96	23516	20381	2.017	18858	4658	16521	3860	1540287
25	22	1	AlexaAntiMouseAb~N/A	HA20421~B25R01C22	6510	39780	110	18860	15608	7488	47	36	36	41	13	31	100	100	0	5403	4379	1941	44	204	204	205	18	8	100	100	0	3.621	3.73	3.81	3.903	1.948	3.926	0.912	101	519	84	24023	19747	1.856	18824	5199	15572	4175	1576408
14	2	1	AlexaAntiMouseAb~N/A	HA20421~B14R01C02	6990	26250	110	18729	15807	6322	39	43	43	52	25	48	100	100	0	4825	3884	1625	41	173	173	175	16	9	100	100	0	4.017	4.248	4.258	4.587	2.318	4.437	0.876	95	522	87	23338	19475	2.006	18686	4652	15764	3711	1501685
7	2	1	AlexaAntiMouseAb~N/A	HA20421~B07R01C02	11500	17300	120	18712	15391	7033	45	46	46	54	35	64	100	100	0	5255	4123	1960	47	169	169	171	16	9	100	100	0	3.67	3.881	3.836	4.172	1.773	3.904	0.948	114	613	95	23752	19299	1.876	18666	5086	15345	3954	1754563
22	21	1	AlexaAntiMouseAb~N/A	HA20421~B22R01C21	10810	35270	100	18707	15802	6244	39	41	41	52	33	63	100	100	0	5587	4520	1907	42	174	174	177	18	10	100	100	0	3.448	3.627	3.688	4.007	1.806	3.71	0.909	88	487	88	24079	20107	1.786	18666	5413	15761	4346	1390600
18	2	1	AlexaAntiMouseAb~N/A	HA20421~B18R01C02	7000	30790	110	18643	15439	6995	45	42	42	51	27	52	100	100	0	5381	4418	1753	39	171	171	174	15	8	100	100	0	3.57	3.625	3.812	3.732	1.815	3.869	0.904	100	545	87	23811	19644	1.836	18601	5210	15397	4247	1543933
33	22	1	AlexaAntiMouseAb~N/A	HA20421~B33R01C22	6530	48780	120	18638	14791	7233	48	37	37	42	14	33	100	100	0	5585	4242	2370	55	234	234	237	23	9	100	100	0	3.476	3.681	3.615	4.779	2.367	3.679	0.892	106	682	93	23952	18762	1.797	18601	5351	14754	4008	1567811
11	2	1	AlexaAntiMouseAb~N/A	HA20421~B11R01C02	11510	21780	120	18598	14927	7300	48	42	42	50	22	44	100	100	0	4752	3973	1902	47	171	171	170	11	6	100	100	0	4.051	3.915	3.856	4.445	2.425	4.073	0.904	104	667	87	23137	18687	2.018	18556	4581	14885	3802	1552437
3	2	1	AlexaAntiMouseAb~N/A	HA20421~B03R01C02	11490	12800	110	18571	15606	5612	35	50	50	57	32	56	100	100	0	4974	4014	1831	45	161	161	161	10	6	100	100	0	3.848	4.037	3.816	4.774	2.168	4.029	0.887	110	466	94	23334	19409	1.944	18521	4813	15556	3853	1716643
4	2	1	AlexaAntiMouseAb~N/A	HA20421~B04R01C02	16010	12800	120	18548	16112	5149	31	45	45	52	24	46	100	100	0	5061	4163	1681	40	154	154	155	11	7	100	100	0	3.771	4.008	3.857	4.975	2.653	3.989	0.914	112	620	93	23410	20076	1.915	18503	4907	16067	4009	1804553
17	2	1	AlexaAntiMouseAb~N/A	HA20421~B17R01C02	2480	30800	110	18517	15351	6657	43	48	48	58	41	70	100	100	0	5245	4059	1963	48	178	178	179	15	8	100	100	0	3.645	3.943	3.809	4.61	2.025	3.946	0.926	103	493	94	23536	19184	1.866	18469	5067	15303	3881	1581116
2	22	1	AlexaAntiMouseAb~N/A	HA20421~B02R01C22	11010	12800	110	18515	15724	6853	43	45	45	53	41	77	100	100	0	5281	4290	1876	43	161	161	161	10	6	100	100	0	3.607	3.797	3.882	4.116	2.074	3.885	0.929	104	522	96	23590	19808	1.851	18470	5120	15679	4129	1635248
34	1	1	AlexaAntiMouseAb~N/A	HA20421~B34R01C01	6830	48800	110	18513	14512	7356	50	38	38	44	16	36	100	100	0	5642	4665	1975	42	235	235	238	24	10	100	100	0	3.417	3.267	3.494	3.126	2.201	3.542	0.894	96	570	84	23882	18904	1.773	18475	5407	14474	4430	1393125
14	1	1	AlexaAntiMouseAb~N/A	HA20421~B14R01C01	6800	26260	100	18447	15342	5911	38	43	43	49	19	38	100	100	0	4799	3995	1577	39	174	174	175	14	8	100	100	0	3.979	4.004	3.955	4.215	1.996	4.26	0.842	93	456	92	23029	19120	1.992	18404	4625	15299	3821	1426780
37	21	15	Hs~Ref:NM_005211.1~CAT:PV3249~RFU:433.91	HA20421~B37R15C21	6350	56120	120	18441	17934	10851	60	58	58	85	99	116	100	99	0	290	337	437	129	215	215	270	139	51	3	3	0	245.107	146.525	300.216	219.61	4.738	-771.478	0.002	130	434	94	18458	17998	7.937	18383	75	17876	122	2331420
25	2	1	AlexaAntiMouseAb~N/A	HA20421~B25R01C02	2510	39780	110	18438	14391	7197	50	49	49	85	230	270	100	98	0	5071	3942	1984	50	196	196	199	26	13	100	100	0	3.772	3.829	3.798	4.03	2.092	3.877	0.943	98	494	87	23264	18088	1.915	18389	4875	14342	3746	1410285
19	21	1	AlexaAntiMouseAb~N/A	HA20421~B19R01C21	15310	30790	110	18392	14550	7652	52	44	44	46	13	28	100	100	0	5577	4478	1941	43	175	175	178	18	10	100	100	0	3.397	3.371	3.654	3.325	3.402	3.775	0.843	93	506	88	23750	18809	1.764	18348	5402	14506	4303	1353192
41	22	1	AlexaAntiMouseAb~N/A	HA20421~B41R01C22	6580	57800	110	18388	14815	6574	44	43	43	49	21	42	100	100	0	5514	4188	2219	52	209	209	213	23	10	100	100	0	3.458	3.712	3.569	4.76	2.193	3.66	0.908	99	540	91	23650	18751	1.79	18345	5305	14772	3979	1466691
25	1	1	AlexaAntiMouseAb~N/A	HA20421~B25R01C01	2310	39790	110	18387	15328	7504	48	46	46	112	341	304	100	100	0	4969	3905	2098	53	204	204	208	27	12	100	100	0	3.849	4.129	4.056	4.946	2.408	4.173	0.895	99	545	84	23106	18983	1.945	18341	4765	15282	3701	1517430
30	1	1	AlexaAntiMouseAb~N/A	HA20421~B30R01C01	6840	44300	120	18370	14120	7653	54	39	39	52	38	73	100	100	0	5913	4420	2364	53	222	222	223	19	8	100	100	0	3.221	3.354	3.408	3.794	2.552	3.518	0.877	99	748	93	24022	18279	1.688	18331	5691	14081	4198	1397887
45	11	16	Hs~MGC:BC038241.1~uORF:IOH28735~RFU:3690.95	HA20421~B45R16C11	4370	65330	110	18353	19340	12342	63	58	58	82	80	97	100	100	0	2375	2136	723	33	186	186	361	288	79	98	95	0	8.358	9.888	8.865	8.484	1.772	13.148	0.795	98	390	86	20484	21232	3.063	18295	2189	19282	1950	1895289
27	21	1	AlexaAntiMouseAb~N/A	HA20421~B27R01C21	15310	39780	100	18336	14636	7315	49	39	39	44	15	34	100	100	0	5058	3922	1944	49	186	186	189	19	10	100	100	0	3.756	3.907	4.002	4.562	2.385	4.103	0.879	94	481	89	23169	18333	1.909	18297	4872	14597	3736	1375759
48	19	15	Hs~Ref:NM_005157.2~CAT:PV3866~RFU:829.6	HA20421~B48R15C19	19510	65060	120	18333	16967	6894	40	44	44	49	23	46	100	100	0	210	219	86	39	164	164	164	13	7	85	82	0	397.587	307.691	381.512	383.595	2.335	580.405	0.011	121	470	95	18335	16978	8.635	18289	46	16923	55	2053001
4	2	18	Hs~MGC:BC002914.1~uORF:IOH5733~RFU:27034.23	HA20421~B04R18C02	16000	16200	140	18266	16612	5740	34	46	46	51	23	45	100	100	0	2744	2416	764	31	160	160	163	16	9	100	100	0	7.051	7.343	7.485	7.944	1.868	7.701	0.901	149	555	92	20804	18822	2.818	18220	2584	16566	2256	2475204
12	1	1	AlexaAntiMouseAb~N/A	HA20421~B12R01C01	15820	21780	100	18251	16300	4558	27	43	43	48	20	41	100	100	0	4926	4526	1135	25	164	164	164	12	7	100	100	0	3.824	3.727	3.812	3.774	1.602	3.853	0.929	85	512	93	22970	20619	1.935	18208	4762	16257	4362	1385469
8	2	1	AlexaAntiMouseAb~N/A	HA20421~B08R01C02	16000	17270	110	18232	16831	4403	26	45	45	47	15	31	100	100	0	4518	4117	1092	26	161	161	162	12	7	100	100	0	4.174	4.243	4.18	4.33	1.523	4.358	0.923	91	528	95	22544	20742	2.062	18187	4357	16786	3956	1531625
37	22	7	Hs~Ref:NM_002756.2~N/A~RFU:11570.33	HA20421~B37R07C22	6540	54520	130	18217	17816	9155	51	39	39	42	10	23	100	100	0	3773	3283	1432	43	212	212	212	12	5	100	99	0	5.105	5.789	5.806	6.553	2.428	6.312	0.88	137	581	91	21739	20848	2.352	18178	3561	17777	3071	2440743
41	21	1	AlexaAntiMouseAb~N/A	HA20421~B41R01C21	6370	57800	110	18129	15829	6945	43	43	43	51	30	58	100	100	0	5854	4394	2256	51	210	210	212	21	9	100	99	0	3.204	3.773	3.681	4.861	2.436	3.748	0.905	100	515	85	23730	19970	1.68	18086	5644	15786	4184	1582880
13	1	1	AlexaAntiMouseAb~N/A	HA20421~B13R01C01	2330	26320	110	18127	15722	7972	50	46	46	56	30	53	100	100	0	4834	3837	1941	50	179	179	185	24	12	100	100	0	3.884	4.285	4.414	5.081	2.168	4.367	0.941	107	525	85	22736	19334	1.958	18081	4655	15676	3658	1682304
37	2	1	AlexaAntiMouseAb~N/A	HA20421~B37R01C02	2550	53310	100	18108	15312	5386	35	45	45	50	18	36	100	100	0	5285	4247	1697	39	216	216	217	16	7	100	100	0	3.563	3.787	3.605	4.068	1.661	3.825	0.916	91	471	93	23132	19298	1.833	18063	5069	15267	4031	1393419
30	21	1	AlexaAntiMouseAb~N/A	HA20421~B30R01C21	10850	44290	110	18107	16224	5989	36	39	39	42	14	33	100	100	0	6245	4946	2182	44	206	206	210	22	10	100	100	0	2.992	3.415	3.363	3.878	2.033	3.461	0.885	88	542	90	24107	20925	1.581	18068	6039	16185	4740	1427702
23	1	1	AlexaAntiMouseAb~N/A	HA20421~B23R01C01	11310	35280	110	18064	14244	7778	54	41	41	54	50	92	100	100	0	5030	3852	2209	57	176	176	181	30	16	100	98	0	3.713	3.864	3.817	4.738	2.439	3.985	0.881	111	562	86	22877	17879	1.893	18023	4854	14203	3676	1581126
23	2	1	AlexaAntiMouseAb~N/A	HA20421~B23R01C02	11510	35280	110	18005	14445	7366	50	40	40	47	25	53	100	100	0	5214	3882	2310	59	180	180	187	33	17	100	98	0	3.569	3.891	3.742	5.068	2.508	3.91	0.868	110	485	85	22999	18107	1.835	17965	5034	14405	3702	1588943
42	2	1	AlexaAntiMouseAb~N/A	HA20421~B42R01C02	7090	57810	110	18002	14663	6183	42	44	44	54	31	57	100	100	0	5355	4326	1979	45	205	205	210	21	10	100	100	0	3.487	3.547	3.44	4.111	2.118	3.555	0.938	96	531	85	23108	18740	1.802	17958	5150	14619	4121	1407635
34	4	16	Hs~Ref:NM_033439~CAT_PHC9255~RFU:135.92	HA20421~B34R16C04	7440	51810	140	17976	19122	13545	70	45	45	56	40	71	100	100	0	266	6888	13872	201	226	226	225	16	7	66	51	0	448.275	2.864	285.861	51.395	50.557	3.438	0.051	137	571	64	17971	25739	8.808	17931	40	19077	6662	2619687
10	22	1	AlexaAntiMouseAb~N/A	HA20421~B10R01C22	11030	21760	110	17940	14366	7022	48	39	39	44	17	38	100	100	0	4750	3988	1589	39	169	169	169	12	7	100	100	0	3.908	3.752	3.835	3.859	2.357	4.116	0.879	103	476	94	22482	18146	1.966	17901	4581	14327	3819	1479694
37	22	1	AlexaAntiMouseAb~N/A	HA20421~B37R01C22	6560	53310	110	17922	14818	7749	52	38	38	43	16	37	100	100	0	5603	4475	2113	47	219	219	220	17	7	100	100	0	3.322	3.473	3.625	3.48	2.677	3.747	0.866	98	548	84	23268	19036	1.732	17884	5384	14780	4256	1452208
2	21	1	AlexaAntiMouseAb~N/A	HA20421~B02R01C21	10800	12810	110	17885	14982	6131	40	50	50	60	44	73	100	100	0	5316	4292	1790	41	161	161	162	12	7	100	100	0	3.46	3.615	3.626	3.942	1.999	3.691	0.932	101	486	91	22990	19063	1.791	17835	5155	14932	4131	1513228
39	22	1	AlexaAntiMouseAb~N/A	HA20421~B39R01C22	15580	53300	100	17851	14199	7261	51	37	37	44	17	38	100	100	0	4784	3821	2215	57	230	230	235	42	17	100	100	0	3.912	3.944	3.699	4.667	2.134	3.954	0.881	98	465	94	22368	17753	1.968	17814	4554	14162	3591	1391494
15	21	1	AlexaAntiMouseAb~N/A	HA20421~B15R01C21	15290	26280	100	17850	16773	4685	27	40	40	43	14	32	100	100	0	5056	4548	1309	28	166	166	167	12	7	100	100	0	3.642	3.819	3.786	3.965	1.562	3.909	0.936	82	496	94	22700	21115	1.865	17810	4890	16733	4382	1375385
6	22	1	AlexaAntiMouseAb~N/A	HA20421~B06R01C22	10960	17260	110	17804	16041	4621	28	46	46	51	23	45	100	100	0	5041	4302	1495	34	168	168	169	12	7	100	100	0	3.644	3.869	3.73	4.163	1.823	3.903	0.915	95	557	95	22631	20129	1.866	17758	4873	15995	4134	1523848
14	5	8	Hs~Ref:NM_005204.2~N/A~RFU:10370.46	HA20421~B14R08C05	7580	27690	130	17776	26205	21643	82	58	58	6297	18067	286	49	30	10	2575	2265	1231	54	176	176	216	168	77	85	83	0	7.386	12.517	11.853	14.369	4.844	32.72	0.236	140	533	87	20117	28236	2.885	17718	2399	26147	2089	3668711
17	18	17	Hs~MGC:NM_152377.1~uORF:IOH11555~RFU:25346.58	HA20421~B17R17C18	5670	34030	190	17762	16272	10166	62	39	39	48	29	60	100	100	0	3300	3060	1662	54	189	189	199	54	27	100	99	0	5.697	5.654	5.575	5.38	1.613	6.152	0.903	268	654	77	20834	19104	2.51	17723	3111	16233	2871	4360923
31	5	7	Hs~Ref:NM_001744.2~uORF:IOH13877~RFU:15248.22	HA20421~B31R07C05	12140	45540	130	17740	17344	8335	48	39	39	43	14	32	100	100	0	2241	1913	701	36	207	207	207	13	6	100	99	0	8.703	10.144	10.775	10.101	1.893	11.256	0.868	135	517	94	19735	19011	3.121	17701	2034	17305	1706	2341385
26	21	1	AlexaAntiMouseAb~N/A	HA20421~B26R01C21	10850	39810	110	17719	15379	5519	35	45	45	47	15	31	100	100	0	5623	4680	1854	39	190	190	191	13	6	100	100	0	3.253	3.415	3.357	3.874	2.121	3.479	0.909	93	527	92	23107	19824	1.702	17674	5433	15334	4490	1430257
37	1	1	AlexaAntiMouseAb~N/A	HA20421~B37R01C01	2350	53310	100	17713	16363	5594	34	45	45	51	27	52	100	100	0	5202	4487	1495	33	217	217	220	18	8	100	100	0	3.544	3.822	3.849	3.955	1.57	3.917	0.942	87	516	92	22653	20588	1.825	17668	4985	16318	4270	1423564
14	21	1	AlexaAntiMouseAb~N/A	HA20421~B14R01C21	10810	26250	100	17697	15704	5696	36	38	38	43	14	32	100	100	0	5360	4499	1723	38	175	175	176	11	6	100	100	0	3.406	3.623	3.612	3.959	2.042	3.766	0.874	91	472	81	22844	19990	1.768	17659	5185	15666	4324	1429098
5	16	5	Hs~MGC:BC048299.1~uORF:IOH26615~RFU:27040.44	HA20421~B05R05C16	5310	18110	130	17640	15978	6578	41	53	53	167	335	200	100	100	0	2220	1841	683	37	165	165	288	296	102	91	86	0	8.558	9.502	9.652	10.629	2.178	10.021	0.914	145	471	95	19642	17601	3.097	17587	2055	15925	1676	2316854
14	22	1	AlexaAntiMouseAb~N/A	HA20421~B14R01C22	11010	26250	110	17606	14319	6214	43	39	39	46	24	52	100	100	0	5323	4518	1652	36	175	175	176	11	6	100	100	0	3.412	3.288	3.475	3.269	2.195	3.557	0.881	93	531	88	22715	18623	1.771	17567	5148	14280	4343	1331693
26	5	8	Hs~Ref:NM_014721.1~uORF:IOH60008~RFU:6111.08	HA20421~B26R08C05	7630	41230	140	17562	15119	6486	42	38	38	43	16	37	100	100	0	730	676	266	39	201	201	202	13	6	100	100	0	33.127	31.749	31.423	36.163	1.597	30.84	0.933	148	524	93	18053	15556	5.05	17524	529	15081	475	2237559
41	19	5	Hs~MGC:BC050432.1~uORF:IOH26694~RFU:3307.92	HA20421~B41R05C19	5960	58620	120	17554	20430	13963	68	41	41	46	20	43	100	100	0	796	831	374	45	200	200	200	11	5	100	95	0	29.384	32.312	33.582	33.898	2.255	35.991	0.897	107	553	85	18109	21020	4.877	17513	596	20389	631	2185979
23	16	16	Hs~Ref:NM_001814.1~uORF:IOH29634~RFU:9662.03	HA20421~B23R16C16	14330	38310	120	17523	17785	10256	57	48	48	101	199	197	100	100	0	1753	1691	805	47	179	179	200	65	32	97	94	0	11.102	11.731	12.282	12.196	1.755	12.65	0.919	132	462	95	19049	19249	3.473	17475	1574	17737	1512	2347652
44	1	5	Hs~MGC:NM_016533.4~uORF:IOH43470~RFU:16723.85	HA20421~B44R05C01	15880	58590	160	17514	28617	25288	88	42	42	54	37	68	100	100	22	1910	4955	9182	185	214	214	209	45	21	83	77	0	10.302	6.027	10.981	12.788	5.795	5.279	0.387	198	610	71	19168	33316	3.365	17472	1696	28575	4741	5666156
15	22	1	AlexaAntiMouseAb~N/A	HA20421~B15R01C22	15490	26280	100	17493	15557	4366	28	39	39	43	16	37	100	100	0	4864	4231	1358	32	167	167	167	11	6	100	100	0	3.716	3.818	3.771	4.132	1.928	3.889	0.915	86	501	93	22151	19582	1.894	17454	4697	15518	4064	1337885
29	21	1	AlexaAntiMouseAb~N/A	HA20421~B29R01C21	6360	44280	110	17493	13411	7728	57	39	39	45	26	57	100	100	0	5411	4294	2156	50	225	225	227	18	7	100	100	0	3.366	3.286	3.417	3.606	2.509	3.545	0.893	106	509	87	22640	17441	1.751	17454	5186	13372	4069	1421601
31	21	1	AlexaAntiMouseAb~N/A	HA20421~B31R01C21	15350	44320	100	17473	14699	5049	34	43	43	50	33	66	100	100	0	5279	4396	1756	39	201	201	206	21	10	100	100	0	3.432	3.494	3.382	3.918	2.146	3.567	0.884	84	504	87	22508	18851	1.779	17430	5078	14656	4195	1234726
13	1	11	AlexaAntiMouseAb~N/A	HA20421~B13R11C01	2310	28330	110	17451	13908	6106	43	44	44	53	26	49	100	100	0	4480	3602	1619	44	173	173	176	19	10	100	100	0	4.042	4.043	4.061	4.647	2.053	4.184	0.899	104	514	90	21714	17293	2.015	17407	4307	13864	3429	1446446
29	2	1	AlexaAntiMouseAb~N/A	HA20421~B29R01C02	2570	44280	110	17441	14838	6421	43	40	40	47	32	68	100	100	0	5000	3788	2069	54	207	207	207	13	6	100	100	0	3.631	4.132	3.782	5.245	2.807	4.201	0.817	99	511	90	22194	18379	1.86	17401	4793	14798	3581	1468918
29	22	1	AlexaAntiMouseAb~N/A	HA20421~B29R01C22	6570	44280	110	17338	13338	7840	58	38	38	43	18	41	100	100	0	5109	4222	2229	52	223	223	226	19	8	100	100	0	3.541	3.326	3.458	3.415	2.847	3.606	0.866	105	519	93	22186	17299	1.824	17300	4886	13300	3999	1400535
38	2	1	AlexaAntiMouseAb~N/A	HA20421~B38R01C02	7070	53300	110	17311	14259	6590	46	41	41	48	25	52	100	100	0	5639	4391	2129	48	221	221	223	18	8	100	100	0	3.188	3.41	3.349	3.884	2.742	3.565	0.849	97	516	87	22688	18388	1.672	17270	5418	14218	4170	1383142
12	11	6	Hs~Ref:NM_032636.2~uORF:IOH4088~RFU:24600.78	HA20421~B12R06C11	17810	22790	130	17294	15364	6752	43	43	43	50	26	52	100	100	0	2075	1669	711	42	165	165	170	22	12	100	100	0	9.032	10.187	10.433	11.747	2.097	10.644	0.882	142	454	94	19161	16825	3.175	17251	1910	15321	1504	2181722
37	21	7	Hs~Ref:NM_002756.2~N/A~RFU:11397.16	HA20421~B37R07C21	6340	54520	140	17283	17105	8673	50	39	39	45	19	42	100	100	0	3783	3296	1393	42	217	217	228	48	21	98	97	0	4.836	5.543	5.809	5.856	1.968	5.908	0.93	137	578	88	20810	20145	2.274	17244	3566	17066	3079	2343449
29	1	1	AlexaAntiMouseAb~N/A	HA20421~B29R01C01	2360	44280	110	17247	14198	5739	40	41	41	49	26	53	100	100	0	4839	3884	1777	45	204	204	207	18	8	100	100	0	3.712	3.847	3.76	4.408	2.325	3.954	0.865	99	561	91	21841	17837	1.892	17206	4635	14157	3680	1405591
42	1	15	Hs~MGC:BC012924.1~uORF:IOH11017~RFU:25585.67	HA20421~B42R15C01	6870	60650	160	17240	17449	11584	66	67	67	351	1118	318	98	95	0	5872	4101	2892	70	198	198	218	68	31	93	73	0	3.027	4.453	4.723	8.521	4.921	4.946	0.722	188	851	39	22847	21285	1.598	17173	5674	17382	3903	3280385
42	3	15	Hs~MGC:BC069092.1~uORF:IOH63641~RFU:22308.75	HA20421~B42R15C03	7280	60610	160	17223	14617	10899	74	60	60	213	800	375	100	96	0	4494	3816	2315	60	204	204	250	200	80	99	98	0	4.001	4.03	3.793	3.408	1.839	4.58	0.898	228	597	74	21453	18169	2	17163	4290	14557	3612	3332565
39	20	15	Hs~Ref:NM_000294.1~CAT:PV4555~RFU:20624.29	HA20421~B39R15C20	15160	56110	140	17221	16574	11442	69	60	60	173	446	257	98	98	0	2714	2580	1249	48	232	232	232	18	7	99	98	0	6.914	7.033	8.537	6.043	3.875	10.46	0.392	154	414	38	19643	18862	2.79	17161	2482	16514	2348	2552453
7	2	11	AlexaAntiMouseAb~N/A	HA20421~B07R11C02	11490	19310	120	17218	14395	6781	47	44	44	47	15	31	100	100	0	4732	3893	1745	44	169	169	170	12	7	100	100	0	3.764	3.854	3.833	4.268	2.576	4.042	0.901	108	495	88	21737	18075	1.912	17174	4563	14351	3724	1554690
19	1	1	AlexaAntiMouseAb~N/A	HA20421~B19R01C01	11300	30800	100	17187	15486	5237	33	45	45	50	17	34	100	100	0	5328	4465	1563	35	181	181	183	17	9	100	100	0	3.33	3.604	3.585	3.776	1.88	3.764	0.88	87	492	94	22289	19725	1.736	17142	5147	15441	4284	1347302
9	2	1	AlexaAntiMouseAb~N/A	HA20421~B09R01C02	2500	21770	110	17172	14358	6202	43	46	46	59	55	93	100	100	0	4745	3917	1801	45	162	162	164	11	6	100	100	0	3.737	3.811	3.684	4.17	2.357	3.902	0.898	99	507	93	21709	18067	1.902	17126	4583	14312	3755	1421484
4	21	1	AlexaAntiMouseAb~N/A	HA20421~B04R01C21	19810	12790	110	17107	14254	5933	41	46	46	52	22	42	100	100	0	4266	3452	1541	44	149	149	149	11	7	100	100	0	4.144	4.302	4.264	5.013	2.325	4.401	0.899	108	484	90	21178	17511	2.051	17061	4117	14208	3303	1539426
33	1	1	AlexaAntiMouseAb~N/A	HA20421~B33R01C01	2330	48770	100	17099	14765	5012	33	43	43	45	13	28	100	100	0	4815	4060	1608	39	211	211	213	18	8	100	100	0	3.705	3.825	3.617	4.212	2.093	3.938	0.865	91	498	93	21660	18571	1.889	17056	4604	14722	3849	1343659
30	21	16	Hs~MGC:BC018906.2~uORF:IOH57152~RFU:27086.86	HA20421~B30R16C21	10830	47300	130	17098	16289	6339	38	42	42	62	82	132	100	100	0	2397	2611	1566	59	231	231	232	15	6	100	100	0	7.874	6.826	8.315	8.631	2.152	7.093	0.676	140	381	90	19222	18627	2.977	17056	2166	16247	2380	2280521
38	1	1	AlexaAntiMouseAb~N/A	HA20421~B38R01C01	6870	53300	110	17044	14189	6942	48	42	42	47	21	44	100	100	0	5235	4249	2127	50	218	218	221	18	8	100	100	0	3.389	3.51	3.556	3.984	2.314	3.612	0.899	100	571	93	22019	18178	1.761	17002	5017	14147	4031	1418933
39	11	14	Hs~MGC:XM_376503.1~uORF:IOH11280~RFU:6348.7	HA20421~B39R14C11	13360	55920	110	17024	15516	7908	50	41	41	47	20	42	100	100	0	1580	1489	661	44	228	228	228	11	4	100	100	0	12.561	12.272	12.426	13.094	1.643	12.511	0.952	114	418	92	18335	16736	3.651	16983	1352	15475	1261	1768853
43	14	4	Hs~Ref:NM_000398.3~uORF:IOH3023~RFU:9943.23	HA20421~B43R04C14	14020	58400	170	17003	17177	11284	65	50	50	79	120	151	100	100	0	2432	3112	1934	62	216	216	224	55	24	100	98	0	7.65	5.914	5.652	6.065	1.737	6.239	0.893	267	531	87	19169	20023	2.936	16953	2216	17127	2896	4586320
1	2	1	AlexaAntiMouseAb~N/A	HA20421~B01R01C02	2480	12820	120	16987	14649	4767	32	48	48	54	27	50	100	100	0	4340	3593	1665	46	165	165	165	10	6	100	100	0	4.057	4.259	4.013	5.681	2.693	4.176	0.884	118	630	87	21114	18029	2.021	16939	4175	14601	3428	1728572
25	2	16	Hs~Ref:NM_003215.1~CAT:PV3269~RFU:780.24	HA20421~B25R16C02	2510	42790	130	16869	16145	8399	52	45	45	67	73	108	100	100	0	252	247	24	9	205	205	205	13	6	86	71	0	357.957	383.333	369.347	382.197	2.039	410.841	0.661	145	443	90	16871	16142	8.484	16824	47	16100	42	2341084
28	2	1	AlexaAntiMouseAb~N/A	HA20421~B28R01C02	16050	39790	110	16849	13344	5996	44	43	43	48	24	50	100	100	0	4990	3873	1843	47	180	180	185	21	11	100	100	0	3.494	3.602	3.508	4.047	2.274	3.731	0.877	92	524	93	21616	16994	1.805	16806	4810	13301	3693	1227671
30	22	1	AlexaAntiMouseAb~N/A	HA20421~B30R01C22	11050	44300	110	16834	14228	6551	46	40	40	47	20	42	100	100	0	6031	4748	2148	45	209	209	213	22	10	100	100	0	2.885	3.126	3.163	3.207	2.468	3.279	0.881	95	535	85	22616	18727	1.528	16794	5822	14188	4539	1351691
42	1	1	AlexaAntiMouseAb~N/A	HA20421~B42R01C01	6890	57810	100	16796	14973	5130	34	43	43	48	21	43	100	100	0	5345	4398	1769	40	204	204	209	21	10	100	100	0	3.259	3.56	3.422	3.983	1.762	3.537	0.94	89	504	85	21894	19124	1.704	16753	5141	14930	4194	1332556
15	2	1	AlexaAntiMouseAb~N/A	HA20421~B15R01C02	11480	26280	110	16749	15268	5908	38	41	41	47	23	48	100	100	0	5356	4604	1689	36	175	175	176	13	7	100	100	0	3.225	3.438	3.528	3.659	1.974	3.587	0.91	99	527	85	21889	19656	1.689	16708	5181	15227	4429	1511535
13	2	1	AlexaAntiMouseAb~N/A	HA20421~B13R01C02	2520	26320	120	16733	14479	6737	46	47	47	73	111	152	100	100	0	4512	3469	2047	59	175	175	176	17	9	100	100	0	3.847	4.381	4.144	5.783	2.666	4.227	0.901	115	578	92	21023	17726	1.944	16686	4337	14432	3294	1665042
30	2	1	AlexaAntiMouseAb~N/A	HA20421~B30R01C02	7050	44290	110	16675	13276	6432	48	38	38	46	22	47	100	100	0	5790	4445	2106	47	223	223	226	19	8	100	100	0	2.989	3.135	3.109	3.461	2.412	3.272	0.892	96	530	95	22204	17460	1.579	16637	5567	13238	4222	1274526
7	1	11	AlexaAntiMouseAb~N/A	HA20421~B07R11C01	11290	19310	110	16628	14042	6134	43	38	38	42	14	33	100	100	0	4660	4052	1430	35	172	172	171	10	5	100	100	0	3.697	3.609	3.82	3.645	2.439	3.905	0.894	105	489	88	21078	17884	1.886	16590	4488	14004	3880	1474360
41	1	1	AlexaAntiMouseAb~N/A	HA20421~B41R01C01	2360	57810	110	16518	14259	4557	31	43	43	48	17	35	100	100	0	4569	3762	1788	47	208	208	210	20	9	100	100	0	3.778	4	3.749	5.404	2.77	3.932	0.857	99	572	81	20836	17770	1.918	16475	4361	14216	3554	1411607
16	1	1	AlexaAntiMouseAb~N/A	HA20421~B16R01C01	15810	26270	110	16512	14740	5094	34	41	41	48	21	43	100	100	0	4614	3786	1522	40	168	168	170	16	9	100	100	0	3.705	4.063	3.987	4.465	2.107	4.15	0.888	86	570	85	20917	18317	1.889	16471	4446	14699	3618	1267600
22	2	1	AlexaAntiMouseAb~N/A	HA20421~B22R01C02	7000	35270	110	16493	14203	6461	45	35	35	41	18	43	100	100	0	5051	4096	1726	42	178	178	179	15	8	100	100	0	3.377	3.616	3.635	3.755	1.981	3.772	0.923	92	515	87	21331	18086	1.756	16458	4873	14168	3918	1306698
40	1	1	AlexaAntiMouseAb~N/A	HA20421~B40R01C01	15870	53280	120	16490	11924	7927	66	40	40	52	39	75	100	100	0	4146	3294	2135	64	229	229	232	21	9	98	98	0	4.2	3.877	3.874	4.43	2.399	3.957	0.923	104	657	86	20367	14949	2.07	16450	3917	11884	3065	1240059
21	1	1	AlexaAntiMouseAb~N/A	HA20421~B21R01C01	2300	35300	120	16488	13993	6179	44	46	46	58	38	65	100	100	0	4813	3996	1717	42	183	183	191	87	45	100	96	0	3.551	3.658	3.781	3.984	2.474	3.893	0.858	105	746	86	21072	17760	1.828	16442	4630	13947	3813	1469246
45	3	13	Hs~MGC:BC007606.1~uORF:IOH6915~RFU:17845.23	HA20421~B45R13C03	2760	64730	130	16480	14999	6959	46	52	52	59	27	45	100	100	0	5210	4387	2121	48	190	190	191	15	7	100	100	0	3.273	3.561	3.583	4.482	2.886	3.68	0.882	143	488	91	21448	19144	1.71	16428	5020	14947	4197	2144856
20	1	1	AlexaAntiMouseAb~N/A	HA20421~B20R01C01	15860	30780	110	16462	14686	6245	42	43	43	49	24	48	100	100	0	4753	3938	1647	41	172	172	177	23	12	100	100	0	3.584	3.888	3.927	4.26	2.077	4.069	0.897	92	536	90	21000	18409	1.842	16419	4581	14643	3766	1351079
22	6	19	Hs~Ref:NM_006875.1~N/A~RFU:13100.8	HA20421~B22R19C06	7800	38880	130	16447	18550	12746	68	45	45	58	54	93	100	100	0	2764	2476	1153	46	203	203	217	41	18	97	94	0	6.405	8.141	8.915	7.945	2.734	9.894	0.833	135	488	90	18963	20778	2.679	16402	2561	18505	2273	2504241
33	2	1	AlexaAntiMouseAb~N/A	HA20421~B33R01C02	2530	48770	110	16400	12814	6253	48	39	39	42	12	28	100	100	0	4725	3754	1850	49	207	207	208	17	8	100	100	0	3.621	3.602	3.584	3.883	2.066	3.711	0.898	102	475	91	20879	16322	1.857	16361	4518	12775	3547	1307022
12	2	1	AlexaAntiMouseAb~N/A	HA20421~B12R01C02	16020	21780	100	16400	15199	4131	27	45	45	48	20	41	100	100	0	4684	4124	1336	32	163	163	167	16	9	100	100	0	3.618	3.826	3.719	4.15	1.779	3.893	0.907	87	474	91	20876	19115	1.855	16355	4521	15154	3961	1322325
45	1	11	AlexaAntiMouseAb~N/A	HA20421~B45R11C01	2360	64320	110	16398	14397	4176	29	46	46	49	18	36	100	100	0	4434	3740	1347	36	234	234	233	24	10	100	100	0	3.893	4.093	3.982	4.758	1.928	4.075	0.928	93	497	91	20552	17857	1.961	16352	4200	14351	3506	1338915
45	21	1	AlexaAntiMouseAb~N/A	HA20421~B45R01C21	6370	62310	100	16340	13261	5320	40	47	47	55	26	47	100	100	0	5452	4574	1914	41	183	183	185	16	8	100	100	0	3.092	3.009	3.066	3.545	2.601	3.188	0.838	90	487	95	21562	17605	1.629	16293	5269	13214	4391	1193475
15	1	1	AlexaAntiMouseAb~N/A	HA20421~B15R01C01	11280	26280	110	16322	15177	4247	27	43	43	54	31	57	100	100	0	5128	4638	1399	30	175	175	176	12	6	100	100	0	3.287	3.391	3.433	3.653	1.728	3.465	0.916	89	576	88	21232	19597	1.717	16279	4953	15134	4463	1350734
26	11	4	Hs~MGC:BC017114.1~uORF:IOH9995~RFU:27073.6	HA20421~B26R04C11	8840	40430	150	16311	14108	5881	41	48	48	218	567	260	100	100	0	1939	1561	777	49	212	212	310	546	176	75	66	0	9.417	10.423	10.166	13.822	2.119	10.204	0.864	200	551	92	17990	15409	3.235	16263	1727	14060	1349	2821681
21	2	11	AlexaAntiMouseAb~N/A	HA20421~B21R11C02	2500	37320	120	16276	13534	5286	39	43	43	49	22	44	100	100	0	4753	3945	1706	43	205	205	287	176	61	98	93	0	3.569	3.607	3.595	4.044	2.123	3.757	0.893	109	399	88	20781	17231	1.836	16233	4548	13491	3740	1475165
38	22	1	AlexaAntiMouseAb~N/A	HA20421~B38R01C22	11060	53320	110	16224	13328	6666	50	41	41	45	14	31	100	100	0	5383	4326	2408	55	227	227	234	24	10	100	100	0	3.139	3.242	3.097	3.977	2.335	3.226	0.912	100	513	90	21339	17386	1.65	16183	5156	13287	4099	1332823
27	3	19	Hs~MGC:BC064840.1~uORF:IOH40500~RFU:27072.77	HA20421~B27R19C03	11700	43410	160	16218	13755	9576	69	40	40	65	107	164	100	100	0	3221	2418	1549	64	205	205	216	46	21	98	95	0	5.364	6.197	6.075	7.041	2.219	6.85	0.82	203	590	78	19194	15928	2.423	16178	3016	13715	2213	2792327
12	12	6	Hs~Ref:NM_032636.2~uORF:IOH4088~RFU:26992.38	HA20421~B12R06C12	18010	22800	140	16212	14581	5442	37	45	45	54	39	72	100	100	0	2124	1784	863	48	162	162	164	12	7	100	99	0	8.24	8.962	9.095	11.567	2.372	8.858	0.873	148	537	93	18129	16158	3.043	16167	1962	14536	1622	2158046
18	22	1	AlexaAntiMouseAb~N/A	HA20421~B18R01C22	11010	30800	100	16209	13547	5301	39	41	41	45	18	40	100	100	0	4992	4077	1574	38	181	181	183	18	9	100	100	0	3.361	3.467	3.589	3.712	1.876	3.61	0.9	95	472	94	20979	17402	1.749	16168	4811	13506	3896	1286995
41	1	16	Hs~Ref:NM_004443.2~CAT:PV3658~RFU:9699.91	HA20421~B41R16C01	2360	60820	130	16179	16118	8083	50	42	42	49	21	42	100	100	0	1936	1715	639	37	201	201	202	13	6	100	98	0	9.301	10.618	11.449	11.269	2.354	11.952	0.848	125	628	88	17872	17590	3.217	16137	1735	16076	1514	2014694
38	21	1	AlexaAntiMouseAb~N/A	HA20421~B38R01C21	10860	53310	110	16153	13410	5358	39	37	37	41	11	26	100	100	0	6013	4878	2069	42	224	224	226	18	7	100	100	0	2.784	2.873	2.827	3.133	1.977	2.906	0.922	93	533	90	21905	18027	1.477	16116	5789	13373	4654	1247166
18	21	1	AlexaAntiMouseAb~N/A	HA20421~B18R01C21	10810	30810	100	16123	14521	5770	39	39	39	45	23	51	100	100	0	5250	4488	1489	33	179	179	179	15	8	100	100	0	3.172	3.361	3.53	3.336	1.719	3.59	0.906	89	458	93	21155	18791	1.665	16084	5071	14482	4309	1292335
27	2	18	Hs~MGC:BC022520.1~uORF:IOH10749~RFU:12950.85	HA20421~B27R18C02	11500	43200	130	16122	13908	5873	42	40	40	52	45	86	100	100	0	2304	2136	1023	47	204	204	204	15	7	100	100	0	7.658	7.178	6.72	8.383	2.242	7.333	0.857	134	548	93	18182	15800	2.937	16082	2100	13868	1932	1863629
22	22	1	AlexaAntiMouseAb~N/A	HA20421~B22R01C22	11010	35280	110	16098	13814	6077	43	44	44	55	38	69	100	100	0	5139	4052	1876	46	176	176	180	21	11	100	100	0	3.235	3.553	3.546	3.988	2.339	3.656	0.891	96	534	89	21017	17646	1.694	16054	4963	13770	3876	1326149
8	4	10	Hs~Ref:NM_024316.1~uORF:IOH12150~RFU:27037.96	HA20421~B08R10C04	16390	19070	130	16096	15564	3900	25	76	76	272	386	141	100	100	0	2706	2452	715	29	228	228	270	124	45	99	94	0	6.465	6.964	6.913	7.604	1.914	7.313	0.822	138	534	96	18498	17712	2.693	16020	2478	15488	2224	2147889
15	1	11	AlexaAntiMouseAb~N/A	HA20421~B15R11C01	11280	28290	110	15991	13711	5549	40	43	43	46	17	36	100	100	0	4766	3954	1659	41	180	180	180	13	7	100	100	0	3.478	3.622	3.694	3.98	1.949	3.68	0.924	100	465	96	20534	17442	1.798	15948	4586	13668	3774	1371055
21	22	19	Hs~MGC:BC013069.1~uORF:IOH10251~RFU:10793.14	HA20421~B21R19C22	6510	38920	130	15981	16404	10766	65	44	44	57	63	110	100	100	0	2819	2680	1130	42	203	203	203	12	5	100	100	0	6.092	6.605	6.501	5.577	1.736	7.775	0.893	128	583	95	18553	18837	2.607	15937	2616	16360	2477	2099745
32	17	16	Hs~Ref:NM_016216.2~uORF:IOH57112~RFU:3036.36	HA20421~B32R16C17	19070	47300	120	15950	16954	5018	29	438	438	1549	2236	144	100	100	0	2889	2687	749	27	203	203	325	200	61	99	99	0	5.775	6.649	6.326	6.981	1.87	7.791	0.711	102	419	93	18198	19000	2.53	15512	2686	16516	2484	1729331
28	1	1	AlexaAntiMouseAb~N/A	HA20421~B28R01C01	15840	39790	100	15903	13523	5020	37	41	41	48	20	41	100	100	0	4912	4129	1551	37	180	180	184	23	12	100	100	0	3.352	3.414	3.355	3.636	1.963	3.562	0.884	87	506	91	20594	17431	1.745	15862	4732	13482	3949	1176494
24	2	1	AlexaAntiMouseAb~N/A	HA20421~B24R01C02	16060	35280	100	15850	13502	4719	34	44	44	48	21	43	100	100	0	4698	4134	1222	29	173	173	176	20	11	100	100	0	3.493	3.398	3.511	3.41	1.617	3.605	0.91	84	472	90	20331	17419	1.804	15806	4525	13458	3961	1134186
47	2	1	AlexaAntiMouseAb~N/A	HA20421~B47R01C02	11620	62270	110	15793	13058	6166	47	42	42	51	25	49	100	100	0	4712	3970	1831	46	192	192	200	29	14	95	93	0	3.485	3.445	3.522	4.614	4.093	3.555	0.924	103	500	86	20271	16794	1.801	15751	4520	13016	3778	1344930
37	2	11	AlexaAntiMouseAb~N/A	HA20421~B37R11C02	2550	55320	110	15788	13122	5347	40	43	43	47	17	36	100	100	0	4533	3681	1730	46	207	207	208	12	5	100	97	0	3.64	3.765	3.643	4.763	2.604	3.771	0.898	106	438	84	20071	16553	1.864	15745	4326	13079	3474	1390929
20	2	1	AlexaAntiMouseAb~N/A	HA20421~B20R01C02	16050	30770	100	15773	13959	5844	41	40	40	51	30	58	100	100	0	4614	3674	1706	46	172	172	177	21	11	100	100	0	3.542	3.975	3.889	4.706	1.96	3.994	0.915	99	448	92	20175	17421	1.825	15733	4442	13919	3502	1381897
35	19	19	Hs~Ref:NM_014055.1~uORF:IOH23043~RFU:27079.81	HA20421~B35R19C19	14970	52400	140	15727	13235	8460	63	43	43	61	51	83	100	100	0	6162	4925	2407	48	246	246	266	60	22	100	99	0	2.651	2.819	2.772	2.558	1.763	3.153	0.918	159	586	91	21600	17871	1.407	15684	5916	13192	4679	2104350
14	2	11	AlexaAntiMouseAb~N/A	HA20421~B14R11C02	6990	28270	120	15714	12363	6194	50	46	46	58	52	89	100	100	0	4272	3322	1653	49	175	175	175	12	6	100	99	0	3.824	3.914	3.934	4.557	2.764	4.001	0.924	115	515	94	19765	15464	1.935	15668	4097	12317	3147	1421794
21	22	18	Hs~Ref:NM_000075.2~N/A~RFU:8369.39	HA20421~B21R18C22	6510	38720	140	15705	15683	7856	50	47	47	57	59	103	100	100	0	2233	2076	1172	56	205	205	233	93	39	90	89	0	7.721	8.357	7.464	11.28	2.833	9.438	0.688	155	681	95	17686	17507	2.949	15658	2028	15636	1871	2430867
42	2	11	AlexaAntiMouseAb~N/A	HA20421~B42R11C02	7080	59820	110	15692	13960	4187	29	45	45	53	46	86	100	100	0	4890	4150	1659	39	199	199	200	15	7	100	100	0	3.336	3.522	3.326	4.072	1.938	3.438	0.904	80	379	100	20338	17866	1.738	15647	4691	13915	3951	1116784
44	15	14	Hs~Ref:NM_002924.2~uORF:IOH11294~RFU:5299.19	HA20421~B44R14C15	18710	60400	110	15691	15331	6864	44	72	72	278	655	235	100	100	0	660	621	206	33	213	213	217	33	15	94	91	0	34.942	37.4	32.427	41.415	1.996	39.103	0.839	118	399	93	16066	15667	5.127	15619	447	15259	408	1809106
5	15	5	Hs~MGC:BC048299.1~uORF:IOH26615~RFU:27070.69	HA20421~B05R05C15	5100	18120	130	15673	14772	6811	46	44	44	53	32	60	100	100	0	2225	1939	733	37	160	160	163	27	16	100	97	0	7.569	8.279	8.071	8.777	2.068	9.033	0.883	148	432	96	17694	16507	2.92	15629	2065	14728	1779	2186203
39	1	1	AlexaAntiMouseAb~N/A	HA20421~B39R01C01	11370	53300	110	15670	12977	7286	56	39	39	46	22	47	100	100	0	5602	4131	2499	60	226	226	231	28	12	100	100	0	2.908	3.313	3.334	4.08	2.496	3.315	0.909	103	565	84	21007	16843	1.54	15631	5376	12938	3905	1336640
31	2	1	AlexaAntiMouseAb~N/A	HA20421~B31R01C02	11560	44320	110	15600	13135	6040	45	41	41	48	19	39	100	100	0	5388	4302	2081	48	207	207	210	22	10	100	100	0	3.003	3.198	3.256	3.615	2.138	3.277	0.896	100	525	96	20740	17189	1.586	15559	5181	13094	4095	1313453
23	21	1	AlexaAntiMouseAb~N/A	HA20421~B23R01C21	15320	35280	110	15578	12639	7532	59	40	40	47	27	57	97	97	0	5140	3921	2037	51	179	179	184	26	14	100	100	0	3.132	3.367	3.686	3.19	4.579	3.873	0.777	98	507	88	20499	16341	1.647	15538	4961	12599	3742	1238636
32	21	1	AlexaAntiMouseAb~N/A	HA20421~B32R01C21	19880	44290	120	15564	11700	7270	62	47	47	59	33	55	100	100	0	4648	3564	1927	54	183	183	187	22	11	100	100	0	3.475	3.447	3.588	3.248	3.224	3.813	0.848	102	648	91	19982	15034	1.797	15517	4465	11653	3381	1193367
23	16	19	Hs~Ref:NM_053030.2~uORF:IOH44055~RFU:19063.9	HA20421~B23R19C16	14320	38930	160	15540	21138	17466	82	40	40	52	36	69	100	100	0	697	1039	850	81	181	181	182	12	6	82	73	0	30.039	24.59	31.04	57.347	4.155	24.562	0.814	232	558	87	16016	21956	4.909	15500	516	21098	858	4903911
23	1	19	Hs~Ref:NM_001203.1~N/A~RFU:3171.15	HA20421~B23R19C01	11310	38910	130	15533	12895	6252	48	38	38	43	16	37	100	100	0	520	499	150	30	191	191	191	12	6	100	98	0	47.097	41.744	43.682	42.758	1.738	44.262	0.877	124	599	86	15824	13165	5.558	15495	329	12857	308	1598968
39	21	1	AlexaAntiMouseAb~N/A	HA20421~B39R01C21	15370	53300	100	15524	13135	5565	42	37	37	47	27	57	100	100	0	5457	4202	2007	47	231	231	233	44	18	100	100	0	2.963	3.298	3.148	3.777	2.352	3.353	0.883	92	466	86	20713	17069	1.567	15487	5226	13098	3971	1208386
27	2	1	AlexaAntiMouseAb~N/A	HA20421~B27R01C02	11500	39790	110	15496	12109	6401	52	40	40	48	29	60	100	100	0	5106	3900	2310	59	196	196	200	19	9	100	99	0	3.148	3.258	3.22	4.488	2.205	3.146	0.967	104	477	87	20366	15773	1.654	15456	4910	12069	3704	1259290
34	21	1	AlexaAntiMouseAb~N/A	HA20421~B34R01C21	10850	48800	100	15456	12691	6534	51	38	38	44	20	45	100	100	0	5305	4281	2019	47	221	221	225	19	8	100	100	0	3.033	3.117	3.118	3.364	2.319	3.277	0.912	94	456	90	20502	16713	1.601	15418	5084	12653	4060	1192997
43	21	1	AlexaAntiMouseAb~N/A	HA20421~B43R01C21	15440	57800	100	15403	12705	5851	46	44	44	53	28	52	100	100	0	5368	4439	1866	42	219	219	220	18	8	100	100	0	2.983	3	3.006	3.082	2.102	3.135	0.92	87	501	92	20508	16881	1.577	15359	5149	12661	4220	1105295
32	22	1	AlexaAntiMouseAb~N/A	HA20421~B32R01C22	20080	44290	100	15395	12352	5731	46	54	54	62	29	46	100	100	0	4582	3624	1673	46	187	187	189	18	9	100	100	0	3.491	3.578	3.536	3.927	2.261	3.773	0.869	89	485	90	19736	15735	1.803	15341	4395	12298	3437	1099316
26	22	1	AlexaAntiMouseAb~N/A	HA20421~B26R01C22	11040	39810	110	15387	12736	6039	47	42	42	48	21	43	100	100	0	5529	4376	1890	43	193	193	194	16	8	100	100	0	2.876	3.035	3.112	3.185	2.288	3.192	0.912	102	499	93	20681	16877	1.524	15345	5336	12694	4183	1299065
4	1	18	Hs~MGC:BC002914.1~uORF:IOH5733~RFU:27050.39	HA20421~B04R18C01	15800	16200	140	15368	14143	4713	33	46	46	51	28	54	100	100	0	2978	2766	881	31	160	160	162	14	8	100	100	0	5.437	5.409	5.619	5.48	1.425	5.622	0.911	151	688	89	18140	16703	2.443	15322	2818	14097	2606	2135664
16	2	1	AlexaAntiMouseAb~N/A	HA20421~B16R01C02	16010	26260	110	15354	12712	4853	38	45	45	50	30	60	100	100	0	4311	3376	1540	45	171	171	172	14	8	100	100	0	3.698	3.952	3.801	4.925	2.964	4.104	0.831	91	528	81	19449	15872	1.887	15309	4140	12667	3205	1156833
45	22	1	AlexaAntiMouseAb~N/A	HA20421~B45R01C22	6570	62310	100	15330	13101	5556	42	47	47	52	25	48	100	100	0	5421	4522	1913	42	183	183	186	19	10	100	96	0	2.918	3.009	3.061	3.543	2.918	3.222	0.834	91	476	90	20521	17393	1.545	15283	5238	13054	4339	1192186
5	2	11	AlexaAntiMouseAb~N/A	HA20421~B05R11C02	2510	19320	120	15323	12973	5557	42	43	43	53	26	49	100	100	0	4132	3278	1730	52	159	159	160	11	6	100	100	0	3.846	4.146	3.944	5.537	2.682	4.102	0.888	110	521	94	19253	16049	1.943	15280	3973	12930	3119	1427026
10	1	11	AlexaAntiMouseAb~N/A	HA20421~B10R11C01	6810	23770	110	15276	12858	5352	41	41	41	50	25	50	100	100	0	4248	3503	1453	41	170	170	172	16	9	100	100	0	3.736	3.845	3.919	4.266	2.164	3.933	0.926	103	461	87	19313	16150	1.901	15235	4078	12817	3333	1324385
17	1	11	AlexaAntiMouseAb~N/A	HA20421~B17R11C01	2270	32820	110	15249	13053	4500	34	38	38	43	14	32	100	100	0	3915	3057	1641	53	184	184	184	15	8	100	99	0	4.077	4.53	4.094	6.477	2.789	4.32	0.869	107	488	94	18942	15888	2.027	15211	3731	13015	2873	1396650
14	1	11	AlexaAntiMouseAb~N/A	HA20421~B14R11C01	6790	28270	120	15237	12306	6632	53	48	48	64	48	75	100	100	0	4264	3169	1738	54	175	175	177	13	7	100	97	0	3.715	4.094	4.129	5.348	3.605	4.222	0.887	119	552	91	19278	15252	1.893	15189	4089	12258	2994	1464372
6	1	11	AlexaAntiMouseAb~N/A	HA20421~B06R11C01	6750	19280	120	15236	12640	5080	40	44	44	47	16	34	100	100	0	4142	3263	1501	46	162	162	163	17	10	100	100	0	3.817	4.062	3.885	4.599	2.033	4.047	0.925	112	471	91	19172	15697	1.932	15192	3980	12596	3101	1415694
34	1	11	AlexaAntiMouseAb~N/A	HA20421~B34R11C01	6830	50810	110	15234	13700	3731	27	39	39	48	30	62	100	100	0	5034	4624	956	20	231	231	234	19	8	100	100	0	3.164	3.11	3.235	3.046	1.488	3.308	0.897	80	426	100	19998	18054	1.662	15195	4803	13661	4393	1095979
6	2	11	AlexaAntiMouseAb~N/A	HA20421~B06R11C02	6950	19280	120	15234	12471	5894	47	49	49	80	95	118	100	100	0	4198	3192	1650	51	166	166	199	110	55	97	90	0	3.766	4.105	3.975	4.953	2.464	4.125	0.909	110	483	93	19217	15448	1.913	15185	4032	12422	3026	1371798
48	8	12	Hs~MGC:BC038838.1~uORF:IOH28760~RFU:27044.59	HA20421~B48R12C08	17310	64460	140	15228	14374	5183	36	105	105	651	2020	310	99	96	0	4877	4565	1252	27	261	261	563	939	166	93	92	0	3.276	3.315	3.324	3.358	1.911	3.817	0.782	150	478	91	19739	18573	1.712	15123	4616	14269	4304	2156119
41	2	1	AlexaAntiMouseAb~N/A	HA20421~B41R01C02	2570	57800	110	15219	12982	4995	38	41	41	46	15	32	100	100	0	4895	3731	1979	53	211	211	211	15	7	100	100	0	3.24	3.676	3.486	5.171	2.864	3.588	0.857	105	516	86	19862	16461	1.696	15178	4684	12941	3520	1363152
36	1	1	AlexaAntiMouseAb~N/A	HA20421~B36R01C01	15870	48810	110	15203	12709	5680	44	42	42	48	23	47	100	100	0	5050	3749	2096	55	220	220	224	24	10	100	97	0	3.139	3.589	3.471	4.926	2.934	3.57	0.851	96	552	86	19991	16196	1.65	15161	4830	12667	3529	1220043
29	1	11	AlexaAntiMouseAb~N/A	HA20421~B29R11C01	2350	46290	110	15191	13677	4609	33	47	47	51	17	33	100	100	0	4784	3861	1766	45	210	210	213	16	7	100	100	0	3.311	3.733	3.585	4.619	2.327	3.694	0.877	99	494	88	19718	17281	1.727	15144	4574	13630	3651	1354049
39	21	3	Hs~Ref:NM_014481.2~uORF:IOH4887~RFU:27022.21	HA20421~B39R03C21	15370	53720	150	15154	12951	7993	61	48	48	93	195	209	100	100	0	2416	2452	2297	93	250	250	287	98	34	84	66	0	6.974	5.86	6.858	11.908	3.239	5.436	0.649	202	450	84	17272	15105	2.802	15106	2166	12903	2202	2616007
34	22	1	AlexaAntiMouseAb~N/A	HA20421~B34R01C22	11050	48790	110	15146	12262	6981	56	37	37	43	18	41	100	100	0	5102	4030	2211	54	222	222	226	19	8	100	100	0	3.096	3.21	3.278	3.643	2.381	3.31	0.923	99	546	94	19989	16033	1.63	15109	4880	12225	3808	1213904
6	11	5	Hs~Ref:NM_007194.2~N/A~RFU:14751.37	HA20421~B06R05C11	8750	18070	120	15111	15786	9276	58	46	46	66	144	218	100	100	0	5142	4337	1909	44	168	168	169	13	7	100	100	0	3.029	3.775	3.768	3.714	1.806	4.258	0.896	135	509	91	20039	19909	1.599	15065	4974	15740	4169	2131067
19	22	1	AlexaAntiMouseAb~N/A	HA20421~B19R01C22	15510	30800	110	15109	12788	6883	53	41	41	45	15	33	100	100	0	5122	4036	1918	47	175	175	180	23	12	100	100	0	3.046	3.301	3.524	3.457	3.132	3.633	0.843	96	513	93	20015	16608	1.607	15068	4947	12747	3861	1227686
3	1	11	AlexaAntiMouseAb~N/A	HA20421~B03R11C01	11290	14810	110	15105	12582	4802	38	46	46	54	33	61	100	100	0	4229	3515	1534	43	165	165	165	10	6	100	100	0	3.705	3.742	3.621	4.384	2.001	3.684	0.951	107	461	86	19123	15886	1.89	15059	4064	12536	3350	1346326
45	2	11	AlexaAntiMouseAb~N/A	HA20421~B45R11C02	2560	64320	110	15091	12736	4586	36	48	48	55	24	43	100	100	0	4388	3485	1580	45	237	237	238	23	9	100	100	0	3.624	3.906	3.656	5.017	2.436	3.844	0.904	104	451	95	19194	15936	1.858	15043	4151	12688	3248	1324587
4	2	11	AlexaAntiMouseAb~N/A	HA20421~B04R11C02	16000	14810	120	15079	12472	5609	44	47	47	51	19	37	100	100	0	4077	3398	1316	38	160	160	198	104	52	100	98	0	3.838	3.837	4.002	3.772	1.934	4.078	0.923	118	497	90	18949	15663	1.94	15032	3917	12425	3238	1471666
29	2	11	AlexaAntiMouseAb~N/A	HA20421~B29R11C02	2560	46290	110	15072	11957	5884	49	45	45	50	17	34	100	98	0	4844	3937	1758	44	210	210	211	18	8	100	97	0	3.243	3.196	3.365	3.438	3.172	3.453	0.856	99	418	90	19661	15639	1.697	15027	4634	11912	3727	1183712
48	2	1	AlexaAntiMouseAb~N/A	HA20421~B48R01C02	16110	62250	110	15057	12628	4730	37	45	45	51	24	47	100	100	0	4460	3828	1700	44	187	187	189	15	7	100	100	0	3.513	3.456	3.319	3.988	2.359	3.536	0.859	99	499	96	19285	16224	1.813	15012	4273	12583	3641	1250211
23	1	17	Hs~MGC:BC014144.1~uORF:IOH12115~RFU:5904.95	HA20421~B23R17C01	11310	38510	120	15055	14423	8342	57	40	40	52	38	73	100	100	0	903	876	448	51	192	192	194	16	8	98	94	0	21.118	21.028	19.823	25.668	2.901	25.322	0.643	126	574	91	15726	15067	4.4	15015	711	14383	684	1817249
35	21	1	AlexaAntiMouseAb~N/A	HA20421~B35R01C21	15370	48800	110	15052	13312	4316	32	40	40	47	27	57	100	100	0	5189	4358	1649	37	220	220	221	14	6	100	100	0	3.021	3.207	3.203	3.468	2.38	3.336	0.844	92	488	91	19981	17410	1.595	15012	4969	13272	4138	1224701
40	22	14	Hs~MGC:BC028629.1~uORF:IOH11485~RFU:19.68	HA20421~B40R14C22	20000	55900	130	15028	29396	28009	95	45	45	189	2591	1370	76	66	25	3255	8033	11595	144	208	208	218	71	32	93	91	0	4.917	3.751	3.204	4.585	6.783	4.359	0.355	184	439	67	18030	37176	2.298	14983	3047	29351	7825	5408907
8	1	11	AlexaAntiMouseAb~N/A	HA20421~B08R11C01	15780	19270	110	14999	12093	5173	42	44	44	48	21	43	100	100	0	3964	3373	1175	34	169	169	171	16	9	100	100	0	3.941	3.761	3.937	3.69	2.144	4.102	0.876	108	479	94	18750	15253	1.978	14955	3795	12049	3204	1306006
37	1	18	Hs~Ref:NM_012321.1~uORF:IOH3488~RFU:26155.85	HA20421~B37R18C01	2340	56730	130	14975	13692	4645	33	75	75	168	193	114	100	100	0	4792	4051	1551	38	218	218	252	76	30	98	93	0	3.258	3.553	3.503	4.281	2.636	3.743	0.84	142	609	84	19474	17450	1.704	14900	4574	13617	3833	1944325
24	1	1	AlexaAntiMouseAb~N/A	HA20421~B24R01C01	15860	35280	100	14968	13065	4560	34	40	40	46	21	45	100	100	0	4880	4245	1325	31	172	172	176	20	11	100	100	0	3.171	3.198	3.309	3.207	1.951	3.437	0.869	85	503	92	19636	17098	1.665	14928	4708	13025	4073	1110513
47	9	9	Hs~MGC:BC000770.1~uORF:IOH4688~RFU:24334.08	HA20421~B47R09C09	13000	63880	130	14959	14074	3702	26	112	112	214	291	135	100	100	0	3848	3318	1190	35	235	235	332	201	60	95	92	0	4.109	4.529	4.368	5.239	2.099	4.522	0.877	143	493	93	18460	17045	2.039	14847	3613	13962	3083	2012647
5	1	11	AlexaAntiMouseAb~N/A	HA20421~B05R11C01	2310	19320	120	14945	12875	6563	50	44	44	47	15	31	100	100	0	4454	3453	1829	52	163	163	163	11	6	100	96	0	3.473	3.9	3.928	5.095	2.894	3.963	0.913	111	541	84	19192	16121	1.796	14901	4291	12831	3290	1429159
2	1	11	AlexaAntiMouseAb~N/A	HA20421~B02R11C01	6790	14820	120	14940	12481	5518	44	43	43	48	20	41	100	100	0	4152	3355	1574	46	162	162	161	10	6	100	100	0	3.734	3.895	3.861	4.591	2.266	3.904	0.937	113	551	89	18887	15631	1.901	14897	3990	12438	3193	1410374
27	1	1	AlexaAntiMouseAb~N/A	HA20421~B27R01C01	11310	39790	100	14907	13334	4965	37	42	42	48	24	50	100	100	0	5506	4485	1858	41	199	199	203	19	9	100	100	0	2.801	3.101	3.131	3.513	1.868	3.087	0.938	87	481	91	20172	17578	1.486	14865	5307	13292	4286	1160038
9	2	9	Hs~MGC:BC001487.2~uORF:IOH12155~RFU:26177.69	HA20421~B09R09C02	2490	23380	130	14899	13812	5321	38	47	47	72	73	101	100	100	0	4450	4023	1285	31	175	175	192	47	24	100	100	0	3.474	3.577	3.615	3.585	2.019	4.029	0.819	133	382	95	19127	17613	1.797	14852	4275	13765	3848	1836972
12	19	7	Hs~Ref:NM_018270.3~uORF:IOH14702~RFU:17983.96	HA20421~B12R07C19	19410	22990	140	14880	13071	5862	44	48	48	62	50	80	100	100	0	5051	4336	1610	37	159	159	165	25	15	100	100	0	3.032	3.118	3.192	3.059	1.881	3.37	0.895	151	572	82	19724	17200	1.6	14832	4892	13023	4177	1973728
42	4	15	Hs~MGC:BC069092.1~uORF:IOH63641~RFU:20986.86	HA20421~B42R15C04	7480	60610	170	14857	13939	11525	82	52	52	73	85	116	100	100	0	3194	3623	2468	68	194	194	211	88	41	100	100	0	4.935	4.05	3.71	2.84	2.304	4.579	0.906	242	651	73	17805	17316	2.303	14805	3000	13887	3429	3373177
23	22	1	AlexaAntiMouseAb~N/A	HA20421~B23R01C22	15520	35280	100	14856	12173	7325	60	40	40	49	30	61	100	97	0	5291	3992	2031	50	181	181	189	32	16	100	100	0	2.899	3.184	3.599	2.993	4.101	3.653	0.801	95	469	85	19926	15944	1.536	14816	5110	12133	3811	1156400
48	7	12	Hs~MGC:BC038838.1~uORF:IOH28760~RFU:27040.44	HA20421~B48R12C07	17110	64460	140	14854	13662	3889	28	133	133	607	1799	296	100	95	0	5021	4700	1066	22	372	372	618	838	135	97	94	0	3.166	3.126	3.164	3.113	1.837	3.493	0.794	147	612	87	19370	17857	1.663	14721	4649	13529	4328	2008383
8	21	1	AlexaAntiMouseAb~N/A	HA20421~B08R01C21	19800	17270	110	14836	13038	4596	35	45	45	52	24	46	100	100	0	4253	3200	1642	51	149	149	152	15	9	100	100	0	3.604	4.259	3.965	5.662	2.444	4.128	0.875	95	515	91	18895	16044	1.85	14791	4104	12993	3051	1238624
8	11	5	Hs~Ref:NM_002344.1~N/A~RFU:8153.9	HA20421~B08R05C11	17790	18080	120	14802	14850	8382	56	44	44	49	22	44	100	100	0	2514	2205	1058	47	157	157	157	10	6	100	100	0	6.261	7.229	7.686	7.697	1.729	7.703	0.925	118	480	91	17115	16854	2.646	14758	2357	14806	2048	1752275
21	1	11	AlexaAntiMouseAb~N/A	HA20421~B21R11C01	2300	37320	120	14798	11390	6623	58	40	40	47	24	51	100	100	0	4407	3388	1952	57	196	196	234	119	50	87	84	0	3.505	3.556	3.545	4.348	3.325	3.802	0.835	124	496	89	18969	14542	1.809	14758	4211	11350	3192	1412398
37	1	11	AlexaAntiMouseAb~N/A	HA20421~B37R11C01	2350	55320	120	14783	12404	5210	42	46	46	52	26	50	100	100	0	4451	3689	1560	42	206	206	207	12	5	100	100	0	3.472	3.548	3.464	3.872	2.367	3.695	0.883	107	586	87	18982	15841	1.796	14737	4245	12358	3483	1327232
36	17	5	Hs~Ref:XM_378514.1~uORF:IOH42688~RFU:27008.95	HA20421~B36R05C17	19040	49610	170	14766	11614	7642	65	49	49	235	893	380	100	94	0	4222	3378	2223	65	212	212	252	134	53	100	99	0	3.67	3.653	3.638	3.83	1.866	3.891	0.823	210	549	73	18727	14731	1.876	14717	4010	11565	3166	2439005
8	22	1	AlexaAntiMouseAb~N/A	HA20421~B08R01C22	20000	17270	110	14760	12482	4633	37	45	45	50	17	34	100	100	0	4085	3240	1580	48	154	154	156	15	9	98	98	0	3.743	4.03	3.892	5.276	2.66	3.928	0.913	95	524	89	18646	15523	1.904	14715	3931	12437	3086	1185823
10	2	11	AlexaAntiMouseAb~N/A	HA20421~B10R11C02	7010	23770	110	14753	12639	5201	41	40	40	46	21	45	100	100	0	4188	3490	1400	40	169	169	169	14	8	100	100	0	3.661	3.794	3.843	4.119	1.968	3.881	0.935	103	413	87	18732	15920	1.872	14713	4019	12599	3321	1301868
12	21	1	AlexaAntiMouseAb~N/A	HA20421~B12R01C21	19820	21780	110	14737	13083	4848	37	42	42	48	19	39	100	100	0	3918	3466	1297	37	152	152	152	11	7	100	100	0	3.902	3.935	3.957	4.267	1.931	4.056	0.912	93	523	92	18461	16355	1.964	14695	3766	13041	3314	1216735
34	2	1	AlexaAntiMouseAb~N/A	HA20421~B34R01C02	7030	48800	110	14732	11352	6479	57	40	40	43	12	27	100	100	0	5387	4202	2004	47	232	232	235	22	9	100	100	0	2.85	2.849	2.917	2.664	1.89	3.069	0.914	102	538	89	19847	15282	1.511	14692	5155	11312	3970	1157906
22	5	19	Hs~Ref:NM_006875.1~N/A~RFU:13058.49	HA20421~B22R19C05	7590	38890	130	14725	17547	13716	78	43	43	47	21	44	100	100	0	2775	2455	1107	45	200	200	203	20	9	97	96	0	5.702	7.762	7.325	7.125	3.216	10.473	0.759	133	533	90	17257	19759	2.511	14682	2575	17504	2255	2333813
41	2	16	Hs~Ref:NM_004443.2~CAT:PV3658~RFU:8489.69	HA20421~B41R16C02	2570	60820	130	14724	14109	6340	44	40	40	45	13	28	100	100	0	2225	1850	770	41	211	211	210	17	8	99	97	0	7.291	8.584	8.506	10.04	2.537	9.157	0.859	127	541	91	16698	15708	2.866	14684	2014	14069	1639	1791865
47	1	1	AlexaAntiMouseAb~N/A	HA20421~B47R01C01	11410	62270	110	14707	12164	5569	45	42	42	49	20	40	100	100	0	5187	4289	1842	42	190	190	198	28	14	99	94	0	2.935	2.957	3.051	3.432	2.658	3.07	0.933	103	566	91	19662	16221	1.553	14665	4997	12122	4099	1252904
8	6	16	Hs~Ref:NM_003656.3~CAT:PV4391~RFU:345.85	HA20421~B08R16C06	16780	20270	120	14703	14066	5056	35	42	42	47	18	38	100	100	0	182	180	14	7	162	162	162	11	6	73	40	0	733.05	779.111	720.538	785.405	2.051	727.089	0.397	115	532	91	14681	14042	9.518	14661	20	14024	18	1617564
23	1	11	AlexaAntiMouseAb~N/A	HA20421~B23R11C01	11320	37300	110	14702	11757	5582	47	46	46	54	28	51	100	100	0	5042	4030	1827	45	186	186	192	23	11	100	100	0	3.018	3.047	3.09	3.144	1.9	3.168	0.92	98	394	91	19512	15555	1.594	14656	4856	11711	3844	1152223
31	1	1	AlexaAntiMouseAb~N/A	HA20421~B31R01C01	11340	44320	110	14657	13063	5291	40	39	39	45	19	42	100	100	0	5531	4399	1859	42	204	204	208	21	10	100	100	0	2.744	3.105	3.147	3.302	2.036	3.217	0.885	98	573	83	19945	17219	1.456	14618	5327	13024	4195	1280148
23	2	11	AlexaAntiMouseAb~N/A	HA20421~B23R11C02	11520	37300	120	14638	11247	5437	48	45	45	59	71	120	100	100	0	4835	3816	1814	47	188	188	195	26	13	100	100	0	3.14	3.088	3.055	3.293	2.177	3.192	0.907	110	419	89	19240	14830	1.651	14593	4647	11202	3628	1237201
2	15	8	Hs~Ref:NM_017503.2~uORF:IOH12519~RFU:27083.95	HA20421~B02R08C15	9590	14220	130	14634	12866	5156	40	46	46	64	45	70	100	100	0	4405	3714	1503	40	165	165	166	13	7	100	100	0	3.441	3.612	3.86	4.037	1.856	3.748	0.89	158	463	96	18828	16369	1.783	14588	4240	12820	3549	2032764
38	16	13	Hs~Ref:NM_000294.1~uORF:IOH4032~RFU:27084.37	HA20421~B38R13C16	9850	55730	140	14632	12061	6368	52	39	39	57	69	121	100	100	0	3331	2545	1513	59	214	214	215	13	6	100	97	0	4.682	5.157	4.988	7.38	2.592	5.028	0.908	159	527	88	17710	14353	2.227	14593	3117	12022	2331	1917695
39	4	10	Hs~Ref:NM_007172.2~uORF:IOH40805~RFU:27075.67	HA20421~B39R10C04	11960	55110	120	14622	12979	5878	45	46	46	69	73	105	100	100	0	3706	3313	1383	41	223	223	223	15	6	100	100	0	4.185	4.185	4.109	4.226	1.799	4.429	0.885	133	492	86	18059	16023	2.065	14576	3483	12933	3090	1726206
22	2	11	AlexaAntiMouseAb~N/A	HA20421~B22R11C02	6990	37270	110	14617	12490	4785	38	41	41	52	35	67	100	100	0	4511	3617	1514	41	190	190	195	38	19	100	100	0	3.373	3.633	3.542	3.885	1.881	3.688	0.907	98	483	87	18897	15876	1.754	14576	4321	12449	3427	1224058
43	2	1	AlexaAntiMouseAb~N/A	HA20421~B43R01C02	11630	57800	110	14554	12262	5636	45	46	46	49	22	44	100	100	0	5338	4415	1988	45	217	217	219	22	10	100	100	0	2.833	2.91	2.846	3.112	2.168	3.051	0.875	99	524	87	19629	16414	1.502	14508	5121	12216	4198	1213951
26	6	8	Hs~Ref:NM_014721.1~uORF:IOH60008~RFU:5760.81	HA20421~B26R08C06	7820	41230	130	14552	13562	5772	42	38	38	53	58	109	100	100	0	844	1181	1741	147	204	204	207	20	9	100	98	0	22.678	13.842	23.305	23.089	2.206	12.657	0.266	138	453	93	15154	14501	4.503	14514	640	13524	977	1871581
31	13	12	Hs~MGC:BC000712.1~uORF:IOH4703~RFU:27075.25	HA20421~B31R12C13	13740	46540	140	14520	13162	5284	40	53	53	283	425	150	100	100	0	2771	2455	985	40	224	224	350	274	78	94	89	0	5.68	5.876	6.135	6.489	1.719	6.236	0.859	147	641	88	17014	15340	2.506	14467	2547	13109	2231	1934807
24	21	1	AlexaAntiMouseAb~N/A	HA20421~B24R01C21	19860	35280	100	14471	12874	5175	40	52	52	62	29	46	100	100	0	4254	3661	1424	38	174	174	193	73	37	98	96	0	3.534	3.677	3.735	3.892	2.471	3.931	0.857	90	464	92	18499	16309	1.821	14419	4080	12822	3487	1158621
43	22	1	AlexaAntiMouseAb~N/A	HA20421~B43R01C22	15640	57800	100	14454	11293	5729	50	48	48	59	37	62	100	100	0	4848	4057	1874	46	215	215	216	17	7	100	100	0	3.109	2.927	2.991	2.914	1.788	3.038	0.94	93	480	92	19039	15087	1.637	14406	4633	11245	3842	1050290
2	2	11	AlexaAntiMouseAb~N/A	HA20421~B02R11C02	6990	14820	120	14427	12441	5221	41	44	44	51	22	43	100	100	0	4135	3379	1561	46	165	165	165	12	7	100	100	0	3.623	3.857	3.739	4.366	2.045	3.853	0.931	111	479	91	18353	15611	1.857	14383	3970	12397	3214	1380992
42	21	1	AlexaAntiMouseAb~N/A	HA20421~B42R01C21	10900	57810	110	14419	11740	6475	55	51	51	63	46	73	100	100	0	4341	3800	2092	55	215	215	225	33	14	100	100	0	3.482	3.261	3.355	3.585	2.176	3.31	0.934	106	509	87	18494	15274	1.8	14368	4126	11689	3585	1244458
37	22	15	Hs~Ref:NM_005211.1~CAT:PV3249~RFU:443.25	HA20421~B37R15C22	6550	56120	130	14415	13192	10338	78	50	50	62	57	91	100	100	0	279	307	114	37	209	209	239	99	41	18	11	0	205.214	134.102	214.176	100.002	7.597	1699.67	0.001	144	531	74	14435	13240	7.681	14365	70	13142	98	1899678
47	2	7	Hs~Ref:NM_001667.1~uORF:IOH1753~RFU:27063.65	HA20421~B47R07C02	11610	63480	140	14376	15682	6273	40	90	90	494	1272	257	100	100	0	8380	7123	2908	40	201	201	238	143	60	99	95	0	1.747	2.253	2.031	2.69	2.536	2.392	0.787	149	516	94	22465	22514	0.805	14286	8179	15592	6922	2336660
35	22	1	AlexaAntiMouseAb~N/A	HA20421~B35R01C22	15570	48790	110	14366	12582	4991	39	38	38	43	15	34	100	100	0	4961	4047	1813	44	219	219	220	17	7	100	100	0	3.022	3.277	3.171	3.945	2.436	3.368	0.862	97	533	95	19070	16372	1.595	14328	4742	12544	3828	1220417
5	6	10	Hs~MGC:BC026039.1~uORF:IOH40656~RFU:27063.65	HA20421~B05R10C06	3310	19120	140	14337	13340	4721	35	45	45	56	44	78	100	100	0	4942	4408	1322	29	168	168	173	21	12	100	100	0	2.994	3.136	3.172	3.151	1.906	3.376	0.875	151	591	93	19066	17535	1.582	14292	4774	13295	4240	2014344
48	1	1	AlexaAntiMouseAb~N/A	HA20421~B48R01C01	15910	62250	110	14327	12307	4502	36	45	45	48	18	37	100	100	0	4702	3914	1626	41	191	191	193	15	7	100	100	0	3.166	3.294	3.161	3.763	2.734	3.445	0.837	93	551	93	18793	15985	1.663	14282	4511	12262	3723	1144512
35	2	1	AlexaAntiMouseAb~N/A	HA20421~B35R01C02	11560	48790	110	14275	11441	5588	48	41	41	51	39	76	100	100	0	5058	3913	2115	54	224	224	228	23	10	100	99	0	2.945	3.09	3.063	4.129	2.676	3.087	0.902	102	520	92	19068	15089	1.558	14234	4834	11400	3689	1166990
47	10	9	Hs~MGC:BC000770.1~uORF:IOH4688~RFU:21264.3	HA20421~B47R09C10	13210	63880	140	14272	13466	3445	25	120	120	231	369	159	100	100	0	3860	3430	1079	31	245	245	279	93	33	96	96	0	3.915	4.19	4.181	4.908	2.361	4.232	0.908	133	524	89	17767	16531	1.969	14152	3615	13346	3185	1790925
28	16	8	Hs~MGC:NM_153645.1~uORF:IOH11663~RFU:21149.7	HA20421~B28R08C16	18830	41200	130	14271	13630	4225	30	52	52	82	77	93	100	100	0	3301	2942	1120	38	206	206	217	50	23	98	96	0	4.594	4.963	4.852	6.164	2.424	5.084	0.853	131	494	87	17314	16314	2.2	14219	3095	13578	2736	1785590
48	21	1	AlexaAntiMouseAb~N/A	HA20421~B48R01C21	19920	62250	110	14255	11688	5699	48	47	47	56	29	51	100	100	0	3941	3112	1797	57	202	202	238	120	50	88	87	0	3.8	4	3.743	5.362	2.933	3.957	0.884	109	469	86	17947	14551	1.926	14208	3739	11641	2910	1273988
8	3	10	Hs~Ref:NM_024316.1~uORF:IOH12150~RFU:27012.27	HA20421~B08R10C03	16190	19060	130	14234	14129	4141	29	209	209	386	457	118	100	100	0	2759	4673	6303	134	232	232	293	152	51	96	94	0	5.55	3.134	6.066	5.428	3.267	2.981	0.161	137	524	95	16552	18361	2.473	14025	2527	13920	4441	1935611
32	2	1	AlexaAntiMouseAb~N/A	HA20421~B32R01C02	16080	44290	120	14209	10471	7625	72	40	40	49	27	55	97	97	0	4492	3360	1950	58	197	197	204	35	17	100	100	0	3.299	3.298	3.692	2.644	3.761	3.803	0.842	116	632	90	18464	13594	1.722	14169	4295	10431	3163	1214680
16	4	9	Hs~Ref:NM_133494.1~uORF:IOH45126~RFU:20831.41	HA20421~B16R09C04	16400	27870	110	14199	14028	2278	16	65	65	1903	2846	149	100	100	0	4605	4655	389	8	184	184	2045	2612	127	100	5	0	3.197	3.123	3.162	3.09	1.203	3.458	0.402	80	407	100	18555	18434	1.677	14134	4421	13963	4471	1122271
4	22	1	AlexaAntiMouseAb~N/A	HA20421~B04R01C22	20020	12800	120	14197	12508	4628	37	47	47	52	19	36	100	100	0	3966	3371	1255	37	149	149	149	10	6	100	100	0	3.707	3.867	3.796	4.143	1.867	3.946	0.93	105	671	90	17967	15683	1.89	14150	3817	12461	3222	1313372
36	2	1	AlexaAntiMouseAb~N/A	HA20421~B36R01C02	16070	48810	110	14186	11397	6885	60	48	48	90	140	155	100	100	0	4131	3278	2198	67	223	223	227	22	9	99	99	0	3.618	3.715	3.664	5.12	2.723	3.705	0.867	108	488	91	18046	14404	1.855	14138	3908	11349	3055	1230826
5	5	10	Hs~MGC:BC026039.1~uORF:IOH40656~RFU:27077.74	HA20421~B05R10C05	3100	19120	130	14183	12453	4517	36	51	51	73	79	108	100	100	0	5116	4521	1341	29	171	171	178	23	12	100	100	0	2.858	2.851	2.919	2.868	1.77	3.079	0.869	153	463	86	19077	16752	1.515	14132	4945	12402	4350	1905249
31	14	18	Hs~MGC:BC036056.1~uORF:IOH27184~RFU:27042.1	HA20421~B31R18C14	13960	47740	120	14151	13264	5416	40	45	45	72	82	113	100	100	0	2885	2557	1110	43	234	234	251	78	31	99	96	0	5.321	5.69	5.938	6.39	1.985	5.772	0.895	125	417	90	16757	15542	2.412	14106	2651	13219	2323	1658018
26	2	11	AlexaAntiMouseAb~N/A	HA20421~B26R11C02	7030	41810	110	14142	12681	4305	33	37	37	42	19	45	100	100	0	4443	3745	1418	37	210	210	211	15	7	100	100	0	3.332	3.577	3.574	3.917	1.783	3.602	0.927	108	435	91	18338	16179	1.736	14105	4233	12644	3535	1369499
40	22	1	AlexaAntiMouseAb~N/A	HA20421~B40R01C22	20080	53280	100	14130	11800	5123	43	46	46	55	30	54	100	100	0	4531	3573	1734	48	209	209	212	18	8	100	100	0	3.259	3.494	3.313	3.944	2.361	3.527	0.89	86	499	94	18406	15118	1.704	14084	4322	11754	3364	1014780
35	1	1	AlexaAntiMouseAb~N/A	HA20421~B35R01C01	11360	48790	110	14113	11751	5092	43	42	42	49	27	55	100	100	0	5032	4063	1980	48	221	221	225	23	10	100	100	0	2.925	3.048	3.013	3.897	2.428	3.02	0.929	99	569	93	18882	15551	1.548	14071	4811	11709	3842	1163319
12	22	1	AlexaAntiMouseAb~N/A	HA20421~B12R01C22	20020	21780	110	14081	12364	5004	40	42	42	46	19	41	100	100	0	3860	3236	1439	44	153	153	155	11	7	100	100	0	3.787	3.997	3.991	4.738	2.174	4.022	0.925	95	516	88	17746	15405	1.921	14039	3707	12322	3083	1174626
47	22	1	AlexaAntiMouseAb~N/A	HA20421~B47R01C22	15630	62270	120	14063	11041	6795	61	44	44	53	28	52	100	100	0	4569	3677	1885	51	192	192	212	70	33	98	96	0	3.203	3.156	3.343	3.037	2.459	3.389	0.939	105	642	93	18396	14482	1.679	14019	4377	10997	3485	1159271
1	2	11	AlexaAntiMouseAb~N/A	HA20421~B01R11C02	2480	14830	130	14028	11281	5727	50	51	51	74	69	93	100	100	0	3904	3008	1501	49	174	174	204	87	42	96	93	0	3.747	3.963	3.953	4.51	2.514	4.087	0.918	132	468	88	17707	14064	1.906	13977	3730	11230	2834	1489040
44	16	14	Hs~Ref:NM_002924.2~uORF:IOH11294~RFU:5340.21	HA20421~B44R14C16	18920	60400	120	14025	13226	6519	49	60	60	166	465	280	100	100	0	691	671	194	28	206	206	217	94	43	97	88	0	28.794	28.314	31.826	27.04	1.91	33.85	0.688	142	472	58	14450	13631	4.848	13965	485	13166	465	1878037
10	9	5	Hs~MGC:BC067755.1~uORF:IOH40120~RFU:27069.45	HA20421~B10R05C09	8420	22570	140	14000	13090	4697	35	57	57	441	722	163	100	100	0	3970	3559	1014	28	177	177	282	202	71	99	98	0	3.676	3.854	3.888	3.827	1.504	4.107	0.919	158	438	94	17736	16415	1.878	13943	3793	13033	3382	2068195
18	1	11	AlexaAntiMouseAb~N/A	HA20421~B18R11C01	6800	32820	120	13996	10861	5904	54	37	37	43	16	37	100	100	0	4203	3265	1770	54	179	179	196	55	28	96	92	0	3.469	3.507	3.538	3.917	2.291	3.599	0.911	123	484	94	17983	13910	1.794	13959	4024	10824	3086	1335859
42	22	1	AlexaAntiMouseAb~N/A	HA20421~B42R01C22	11110	57810	110	13991	12406	6025	48	44	44	62	53	85	100	100	0	4859	4078	1864	45	215	215	225	35	15	100	100	0	3.003	3.2	3.256	3.375	2.115	3.388	0.888	96	518	95	18591	16225	1.587	13947	4644	12362	3863	1191016
40	12	15	Hs~Ref:NM_003517.2~uORF:IOH29296~RFU:6433.37	HA20421~B40R15C12	18060	56090	160	13961	18849	14845	78	64	64	150	249	166	100	100	0	632	1563	1362	87	226	226	236	46	19	95	90	0	34.229	14.05	17.535	22.461	2.447	13.258	0.837	223	547	67	14303	20122	5.097	13897	406	18785	1337	4203278
11	1	11	AlexaAntiMouseAb~N/A	HA20421~B11R11C01	11310	23810	120	13947	10980	5811	52	48	48	59	47	79	100	100	0	3958	3133	1591	50	172	172	186	46	24	98	93	0	3.671	3.692	3.728	4.196	2.665	3.885	0.885	112	543	94	17685	13893	1.876	13899	3786	10932	2961	1229773
48	21	16	Hs~Ref:NM_173558.2~uORF:IOH57227~RFU:2105.08	HA20421~B48R16C21	19910	65260	110	13887	14075	2583	18	1167	1167	1878	1839	97	100	100	0	5552	5615	485	8	1165	1165	1742	1768	101	100	97	0	2.899	2.901	2.865	2.86	1.2	3.486	0.503	95	363	88	17107	17358	1.536	12720	4387	12908	4450	1337130
37	13	7	Hs~Ref:NM_000723.3~uORF:IOH39502~RFU:15572.88	HA20421~B37R07C13	4740	54520	110	13874	13763	2314	16	121	121	1941	2580	132	100	100	0	1965	1963	164	8	250	250	429	275	64	100	100	0	8.019	7.964	8.078	7.873	1.196	8.339	0.794	80	438	100	15468	15355	3.003	13753	1715	13642	1713	1101048
43	1	1	AlexaAntiMouseAb~N/A	HA20421~B43R01C01	11430	57810	110	13849	12187	4333	35	42	42	49	19	38	100	100	0	5100	4318	1653	38	225	225	225	19	8	100	100	0	2.832	2.967	2.874	3.19	2.341	3.095	0.854	95	580	91	18682	16238	1.502	13807	4875	12145	4093	1157740
21	10	7	Hs~Ref:NM_006504.2~uORF:IOH20996~RFU:6885.05	HA20421~B21R07C10	4100	36520	130	13847	14360	9767	68	39	39	41	10	24	100	100	0	2217	2043	786	38	192	192	203	31	15	100	100	0	6.819	7.737	6.979	6.193	1.849	9.416	0.894	122	506	91	15833	16172	2.77	13808	2025	14321	1851	1751945
38	1	16	Hs~Ref:NM_003600.1~CAT:PV3612~RFU:1195.51	HA20421~B38R16C01	6840	56320	110	13844	14360	3122	21	54	54	171	405	236	100	100	0	284	807	1267	157	218	218	231	74	32	37	25	0	208.939	24.289	210.586	116.049	5.388	35.388	0.069	80	403	100	13856	14895	7.707	13790	66	14306	589	1148800
39	1	11	AlexaAntiMouseAb~N/A	HA20421~B39R11C01	11360	55310	110	13825	10831	4834	44	39	39	45	15	33	100	100	0	5016	3976	1921	48	213	213	218	24	11	99	97	0	2.87	2.868	2.791	3.481	2.094	2.841	0.948	106	468	84	18589	14555	1.521	13786	4803	10792	3763	1148085
14	7	10	Hs~MGC:BC005378.1~uORF:IOH7320~RFU:19563.24	HA20421~B14R10C07	7990	28070	130	13825	12841	4007	31	42	42	49	32	65	100	100	0	4636	3943	1539	39	178	178	178	10	5	100	100	0	3.092	3.399	3.286	3.877	2.072	3.439	0.874	133	500	87	18241	16564	1.628	13783	4458	12799	3765	1707845
36	18	5	Hs~Ref:XM_378514.1~uORF:IOH42688~RFU:23794.95	HA20421~B36R05C18	19260	49620	140	13820	13347	7985	59	51	51	220	901	409	100	98	0	5151	3945	2306	58	209	209	291	212	72	100	99	0	2.786	3.559	3.571	3.752	1.606	3.851	0.834	177	514	80	18711	17032	1.478	13769	4942	13296	3736	2362369
4	1	11	AlexaAntiMouseAb~N/A	HA20421~B04R11C01	15790	14800	120	13817	11700	5043	43	49	49	54	23	42	100	100	0	4100	3223	1477	45	160	160	185	89	48	98	95	0	3.494	3.804	3.793	4.295	2.302	3.913	0.886	112	562	86	17708	14714	1.805	13768	3940	11651	3063	1310435
19	18	17	Hs~MGC:BC001280.1~uORF:IOH21165~RFU:25938.9	HA20421~B19R17C18	14700	34010	130	13800	12564	5077	40	40	40	47	24	51	100	100	0	3449	2868	1123	39	185	185	188	21	11	99	99	0	4.216	4.668	4.545	5.499	2.546	4.897	0.887	144	494	90	17024	15207	2.076	13760	3264	12524	2683	1809177
37	21	9	Hs~Ref:NM_004728.2~uORF:IOH46173~RFU:9755.5	HA20421~B37R09C21	6350	54930	120	13800	12272	6330	51	42	42	46	15	32	100	100	0	1574	1344	579	43	210	210	210	13	6	99	99	0	10.087	10.785	10.566	11.652	2.14	11.473	0.893	120	465	94	15122	13364	3.334	13758	1364	12230	1134	1472626
17	17	17	Hs~MGC:NM_152377.1~uORF:IOH11555~RFU:27089.76	HA20421~B17R17C17	5480	34040	200	13798	14084	9132	64	36	36	41	20	48	100	100	0	1902	2564	1558	60	186	186	187	12	6	100	100	0	8.02	5.907	5.621	5.821	1.937	6.787	0.753	286	795	67	15478	16426	3.004	13762	1716	14048	2378	4027885
10	10	5	Hs~MGC:BC067755.1~uORF:IOH40120~RFU:27063.24	HA20421~B10R05C10	8620	22570	140	13797	13815	3416	24	74	74	372	653	175	100	100	0	4013	3827	783	20	217	217	717	1002	139	97	93	0	3.615	3.806	3.753	3.831	1.468	4.195	0.811	147	560	95	17519	17351	1.854	13723	3796	13741	3610	2030844
12	20	7	Hs~Ref:NM_018270.3~uORF:IOH14702~RFU:18726.32	HA20421~B12R07C20	19620	23000	130	13781	12237	5094	41	48	48	70	69	98	100	100	0	5061	4323	1689	39	160	160	172	36	20	97	96	0	2.802	2.928	2.931	3.336	2.387	3.04	0.926	150	510	90	18634	16352	1.486	13733	4901	12189	4163	1835496
12	1	11	AlexaAntiMouseAb~N/A	HA20421~B12R11C01	15810	23800	110	13777	11634	5277	45	41	41	44	12	27	100	100	0	4131	3476	1358	39	161	161	162	12	7	100	100	0	3.46	3.497	3.688	3.325	2.89	3.863	0.833	99	498	91	17706	14908	1.791	13736	3970	11593	3315	1151800
11	2	11	AlexaAntiMouseAb~N/A	HA20421~B11R11C02	11510	23810	120	13766	11630	5902	50	47	47	57	36	63	100	100	0	4105	3271	1603	49	173	173	182	39	21	100	96	0	3.489	3.739	3.858	4.369	2.711	3.938	0.881	106	517	89	17651	14681	1.803	13719	3932	11583	3098	1232733
8	5	16	Hs~Ref:NM_003656.3~CAT:PV4391~RFU:312.39	HA20421~B08R16C05	16580	20270	110	13717	13058	4110	31	41	41	47	18	38	100	100	0	186	186	17	9	160	160	161	9	5	82	69	0	526	500.654	452.75	503.487	1.721	513.107	0.514	113	437	84	13702	13043	9.039	13676	26	13017	26	1475607
8	12	5	Hs~Ref:NM_002344.1~N/A~RFU:8678.52	HA20421~B08R05C12	17990	18080	130	13709	13968	8405	60	44	44	48	14	29	100	100	0	2423	2056	1169	56	157	157	156	11	7	97	97	0	6.03	7.332	7.702	9.149	2.099	7.502	0.94	132	436	93	15931	15823	2.592	13665	2266	13924	1899	1843813
41	14	13	Hs~MGC:BC015514.1~uORF:IOH11731~RFU:24978.6	HA20421~B41R13C14	4980	60210	150	13698	11828	5726	48	55	55	151	264	174	100	100	0	3354	2819	1547	54	201	201	220	68	30	95	92	0	4.327	4.497	4.762	5.526	2.717	4.771	0.765	164	625	82	16796	14391	2.113	13643	3153	11773	2618	1939802
25	2	11	AlexaAntiMouseAb~N/A	HA20421~B25R11C02	2510	41790	120	13695	10556	5172	48	40	40	43	14	32	100	100	0	3772	2948	1645	55	195	195	195	14	7	100	100	0	3.817	3.82	3.795	5.385	3.235	3.822	0.878	114	472	87	17232	13269	1.933	13655	3577	10516	2753	1203354
9	21	2	Hs~Ref:NM_014303.2~uORF:IOH21738~RFU:27078.57	HA20421~B09R02C21	6280	21990	170	13683	13232	3310	25	47	47	65	55	84	100	100	0	2848	2764	1201	43	169	169	197	82	41	99	98	0	5.09	5.081	4.757	5.797	1.84	5.05	0.803	257	549	80	16315	15780	2.348	13636	2679	13185	2595	3400531
41	9	20	Hs~Ref:NM_005558.2~uORF:IOH13864~RFU:5344.62	HA20421~B41R20C09	3970	61620	130	13650	12951	5509	42	45	45	56	35	62	100	100	0	989	1014	422	41	192	192	193	12	6	100	100	0	17.07	15.701	15.715	17.814	1.841	16.178	0.866	139	481	91	14402	13728	4.093	13605	797	12906	822	1800245
31	2	11	AlexaAntiMouseAb~N/A	HA20421~B31R11C02	11540	46340	110	13634	11286	5548	49	43	43	47	16	34	100	100	0	4973	3856	1908	49	218	218	220	17	7	100	100	0	2.858	3.09	3.188	3.704	2.891	3.233	0.862	107	432	86	18346	14881	1.515	13591	4755	11243	3638	1207635
18	2	11	AlexaAntiMouseAb~N/A	HA20421~B18R11C02	7000	32820	120	13622	11051	6252	56	41	41	51	32	62	100	100	0	4244	3162	1892	59	178	178	207	70	33	97	90	0	3.34	3.69	3.583	4.395	2.27	3.74	0.902	128	452	91	17647	13994	1.74	13581	4066	11010	2984	1414501
27	14	3	Hs~Ref:NM_006038.1~uORF:IOH14383~RFU:27064.06	HA20421~B27R03C14	13910	40190	130	13615	12902	5237	40	37	37	40	11	27	100	100	0	7156	6041	2220	36	186	186	187	12	6	100	100	0	1.948	2.197	2.292	2.327	1.871	2.32	0.879	142	441	97	20548	18720	0.962	13578	6970	12865	5855	1832042
1	1	11	AlexaAntiMouseAb~N/A	HA20421~B01R11C01	2270	14830	130	13607	11300	5420	47	46	46	63	57	90	100	100	0	3633	2973	1555	52	161	161	165	21	12	100	99	0	3.906	4.002	3.939	4.984	2.28	3.957	0.942	131	597	84	17033	14066	1.966	13561	3472	11254	2812	1480350
29	14	18	Hs~Ref:NM_181714.1~uORF:IOH26433~RFU:9096.28	HA20421~B29R18C14	4970	47700	120	13585	14910	9020	60	49	49	59	34	57	100	100	0	1486	1367	549	40	229	229	232	23	9	98	96	0	10.768	13.059	13.763	14.082	2.411	15.117	0.852	113	436	95	14793	15999	3.429	13536	1257	14861	1138	1684869
29	22	21	Hs~Ref:NP_000600.1~CAT_PHC1361~RFU:1971.27	HA20421~B29R21C22	6550	48320	160	13563	12862	4608	35	37	37	44	22	50	100	100	0	277	355	347	97	231	231	232	15	6	87	75	0	294.043	103.427	247.347	229.15	2.785	115.284	0.07	260	765	83	13572	12949	8.2	13526	46	12825	124	3344205
31	3	1	ERa~N/A	HA20421~B31R01C03	11750	44320	120	13524	13205	3582	27	39	39	48	32	66	100	100	0	241	244	20	8	202	202	203	15	7	91	66	0	345.769	313.476	321.978	340.417	1.695	354.259	0.536	124	602	93	13524	13208	8.434	13485	39	13166	42	1637358
37	3	8	Hs~Ref:NM_001982.1~N/A~RFU:3098.34	HA20421~B37R08C03	2740	54730	130	13523	13213	7114	53	49	49	61	37	60	100	100	0	1334	1236	522	42	216	216	254	102	40	92	90	0	12.052	12.906	12.537	14.398	2.249	14.332	0.846	141	508	94	14592	14184	3.591	13474	1118	13164	1020	1863097
43	11	5	Hs~MGC:NM_138730.1~uORF:IOH9857~RFU:7964.28	HA20421~B43R05C11	13420	58610	140	13498	13200	4374	33	65	65	311	1020	327	100	100	0	1055	1191	580	48	235	235	321	188	58	97	90	0	16.382	13.74	18.521	14.942	1.952	19.897	0.373	163	498	81	14253	14091	4.034	13433	820	13135	956	2151642
41	20	5	Hs~MGC:BC050432.1~uORF:IOH26694~RFU:3517.98	HA20421~B41R05C20	6160	58620	120	13480	16240	13013	80	41	41	48	30	62	100	100	0	691	764	399	52	201	201	200	12	6	96	93	0	27.427	28.773	30.656	29.903	2.531	32.552	0.88	117	543	88	13929	16762	4.778	13439	490	16199	563	1900125
13	2	4	Hs~Ref:NM_016564.1~uORF:IOH22629~RFU:27068.62	HA20421~B13R04C02	2510	26930	110	13477	12967	2252	17	260	260	3460	4649	134	100	92	0	6841	6921	671	9	205	205	1604	1960	122	100	100	0	1.992	1.892	1.906	1.871	1.231	2.405	0.703	80	331	100	19853	19423	0.994	13217	6636	12707	6716	1037384
31	22	1	AlexaAntiMouseAb~N/A	HA20421~B31R01C22	15550	44330	110	13470	11474	5970	52	43	43	49	22	44	100	100	0	4337	3557	1929	54	204	204	209	23	11	100	99	0	3.249	3.409	3.319	4.033	2.522	3.468	0.902	100	532	88	17560	14784	1.7	13427	4133	11431	3353	1147365
12	10	17	Hs~MGC:NM_175738.2~uORF:IOH27507~RFU:14435.97	HA20421~B12R17C10	17610	24990	130	13467	17398	11938	68	103	103	947	2501	264	92	84	0	6807	5885	2301	39	176	176	186	32	17	99	98	0	2.015	3.029	2.808	2.9	4.935	5.608	0.346	152	454	95	19995	23004	1.011	13364	6631	17295	5709	2644539
40	16	17	Hs~MGC:BC009108.1~uORF:IOH10191~RFU:14242.14	HA20421~B40R17C16	18860	56490	130	13429	11956	5871	49	55	55	157	549	349	100	100	0	2357	2268	1549	68	221	221	267	158	59	90	70	0	6.261	5.814	5.879	9.083	2.529	5.329	0.849	177	503	80	15510	13948	2.646	13374	2136	11901	2047	2116174
15	2	11	AlexaAntiMouseAb~N/A	HA20421~B15R11C02	11480	28290	110	13412	11911	5169	43	43	43	47	18	38	100	100	0	4563	3672	1611	43	177	177	177	13	7	99	96	0	3.048	3.396	3.561	4.138	2.64	3.428	0.947	105	430	89	17755	15363	1.608	13369	4386	11868	3495	1250622
38	15	13	Hs~Ref:NM_000294.1~uORF:IOH4032~RFU:27090.59	HA20421~B38R13C15	9650	55730	140	13406	11731	5701	48	39	39	50	38	76	100	100	0	3601	2821	1441	51	214	214	214	13	6	100	100	0	3.947	4.485	4.507	5.405	2.141	4.473	0.927	149	536	86	16754	14299	1.981	13367	3387	11692	2607	1747944
8	20	17	Hs~Ref:NM_004196.2~N/A~RFU:13626.72	HA20421~B08R17C20	19590	20470	140	13392	12053	6560	54	49	49	67	57	85	98	98	0	5491	4526	2051	45	158	158	172	52	30	98	98	0	2.502	2.748	2.957	2.741	3.398	3.122	0.818	162	593	94	18676	16372	1.323	13343	5333	12004	4368	1952579
19	17	17	Hs~MGC:BC001280.1~uORF:IOH21165~RFU:25051.41	HA20421~B19R17C17	14500	34010	130	13380	12182	4273	35	38	38	41	13	31	100	100	0	3493	3287	1179	35	181	181	183	17	9	100	100	0	4.028	3.91	3.977	4.177	1.834	4.071	0.89	134	557	90	16654	15250	2.01	13342	3312	12144	3106	1632343
32	14	16	Hs~MGC:BC015875.1~uORF:IOH62816~RFU:27051.22	HA20421~B32R16C14	18470	47300	130	13370	13887	7509	54	49	49	62	37	59	100	100	0	5517	4885	1773	36	204	204	228	62	27	100	100	0	2.507	2.956	2.908	2.738	2.438	3.536	0.812	127	411	90	18634	18519	1.326	13321	5313	13838	4681	1763660
8	12	17	Hs~Ref:NM_001032293.1~uORF:IOH3584~RFU:27017.65	HA20421~B08R17C12	17990	20480	150	13357	11656	5569	47	44	44	65	83	127	100	100	0	3410	2712	1319	48	162	162	174	54	31	100	100	0	4.099	4.554	4.621	4.993	1.852	4.762	0.89	173	569	94	16561	14162	2.035	13313	3248	11612	2550	2016423
8	2	11	AlexaAntiMouseAb~N/A	HA20421~B08R11C02	15980	19270	110	13356	11302	4937	43	46	46	77	163	211	100	100	0	3701	3230	1070	33	167	167	172	21	12	100	100	0	3.766	3.675	3.846	3.494	1.909	4.018	0.892	106	463	93	16844	14319	1.913	13310	3534	11256	3063	1198035
39	2	1	AlexaAntiMouseAb~N/A	HA20421~B39R01C02	11570	53300	110	13342	10572	6559	62	41	41	47	18	38	100	100	0	5166	3879	2278	58	232	232	238	32	13	100	100	0	2.696	2.888	2.952	3.132	2.321	2.991	0.922	111	512	83	18235	14178	1.431	13301	4934	10531	3647	1173446
30	1	11	AlexaAntiMouseAb~N/A	HA20421~B30R11C01	6840	46310	110	13341	11121	4608	41	40	40	42	11	26	100	100	0	4754	3721	1699	45	229	229	229	14	6	100	100	0	2.939	3.173	3.114	3.602	1.921	3.148	0.942	95	510	91	17826	14573	1.556	13301	4525	11081	3492	1056491
32	1	1	AlexaAntiMouseAb~N/A	HA20421~B32R01C01	15870	44300	110	13306	10826	5970	55	41	41	53	34	64	100	100	0	4740	3698	1769	47	200	200	208	35	16	100	100	0	2.922	3.083	3.258	2.909	2.265	3.31	0.909	104	555	97	17805	14283	1.547	13265	4540	10785	3498	1125883
38	1	11	AlexaAntiMouseAb~N/A	HA20421~B38R11C01	6860	55320	110	13289	10959	4998	45	39	39	48	37	77	100	100	0	4359	3364	1713	50	215	215	217	13	5	100	100	0	3.197	3.468	3.25	4.097	2.284	3.493	0.885	104	516	92	17394	14069	1.677	13250	4144	10920	3149	1139700
38	2	11	AlexaAntiMouseAb~N/A	HA20421~B38R11C02	7060	55320	110	13284	11214	4490	40	39	39	47	23	48	100	100	0	4477	3562	1645	46	216	216	217	12	5	100	100	0	3.108	3.34	3.179	4.144	2.3	3.339	0.904	101	495	95	17506	14521	1.636	13245	4261	11175	3346	1132651
21	21	19	Hs~MGC:BC013069.1~uORF:IOH10251~RFU:10544.09	HA20421~B21R19C21	6310	38920	130	13250	13126	9136	69	43	43	93	313	336	99	98	0	2554	2611	1206	46	206	206	205	12	5	100	99	0	5.625	5.44	4.932	4.416	2.343	6.533	0.855	134	504	96	15555	15488	2.492	13207	2348	13083	2405	1758878
37	12	17	Hs~Ref:NM_016096.1~uORF:IOH10050~RFU:26645.84	HA20421~B37R17C12	4550	56530	150	13222	11404	4996	43	43	43	52	54	103	100	100	0	5272	4491	1672	37	231	231	233	23	9	100	100	0	2.614	2.667	2.748	2.586	1.563	2.866	0.9	172	614	90	18220	15621	1.386	13179	5041	11361	4260	1961497
19	1	11	AlexaAntiMouseAb~N/A	HA20421~B19R11C01	11300	32800	110	13221	10989	4484	40	39	39	46	25	54	100	100	0	4185	3385	1479	43	182	182	182	13	7	100	100	0	3.293	3.419	3.425	3.862	1.754	3.401	0.952	99	502	93	17185	14153	1.719	13182	4003	10950	3203	1087908
34	8	9	Hs~Ref:NM_138416.1~uORF:IOH40625~RFU:7283.91	HA20421~B34R09C08	8230	50410	130	13199	18416	16225	88	39	39	73	96	131	98	98	0	1838	2535	3187	125	234	234	263	72	27	94	93	0	8.204	7.987	13.709	7.893	4.397	18.74	0.099	138	484	86	14764	20678	3.036	13160	1604	18377	2301	2541414
11	17	15	Hs~Ref:NM_032028.2~CAT:PV3505~RFU:651.35	HA20421~B11R15C17	14510	24610	120	13198	13452	4019	29	43	43	46	16	34	100	100	0	197	199	34	17	168	168	168	11	6	84	62	0	453.621	432.548	449.701	497.539	2.057	455.551	0.318	129	473	93	13184	13440	8.825	13155	29	13409	31	1735371
16	5	8	Hs~Ref:NM_003582.1~N/A~RFU:13129.45	HA20421~B16R08C05	16600	27680	130	13198	12137	4905	40	48	48	63	50	79	100	100	0	1574	1419	637	44	175	175	190	39	20	99	91	0	9.4	9.718	9.735	11.919	2.175	9.753	0.897	134	515	84	14549	13333	3.233	13150	1399	12089	1244	1626404
8	19	17	Hs~Ref:NM_004196.2~N/A~RFU:16041.72	HA20421~B08R17C19	19390	20470	140	13193	11191	5945	53	50	50	73	65	89	98	98	0	5375	4445	2114	47	161	161	186	63	33	100	100	0	2.521	2.601	2.867	2.704	3.222	2.979	0.761	166	539	88	18357	15425	1.334	13143	5214	11141	4284	1857701
19	2	11	AlexaAntiMouseAb~N/A	HA20421~B19R11C02	11500	32800	110	13187	12083	3857	31	37	37	41	16	39	100	100	0	4182	3512	1348	38	180	180	180	11	6	100	100	0	3.286	3.615	3.494	4.032	1.881	3.593	0.93	93	496	84	17152	15378	1.716	13150	4002	12046	3332	1123701
37	11	17	Hs~Ref:NM_016096.1~uORF:IOH10050~RFU:27066.55	HA20421~B37R17C11	4350	56530	140	13162	11869	5686	47	45	45	59	61	103	100	100	0	4557	3897	1623	41	243	243	271	87	32	100	100	0	3.041	3.236	3.197	3.317	2.413	3.784	0.738	169	560	89	17431	15478	1.604	13117	4314	11824	3654	2005914
3	2	11	AlexaAntiMouseAb~N/A	HA20421~B03R11C02	11500	14810	110	13143	11533	3813	33	43	43	48	21	43	100	100	0	4055	3479	1333	38	164	164	165	10	6	100	100	0	3.367	3.466	3.376	4.012	1.945	3.432	0.951	104	416	94	16991	14805	1.751	13100	3891	11490	3315	1199423
27	3	1	ERa~N/A	HA20421~B27R01C03	11700	39780	110	13108	12219	3301	27	42	42	55	48	87	100	100	0	251	296	177	59	192	192	193	12	6	90	83	0	221.458	117.087	216.349	203.129	2.539	125.932	0.181	120	494	82	13125	12281	7.791	13066	59	12177	104	1466319
14	17	20	Hs~MGC:BC041799.1~uORF:IOH25876~RFU:14998.77	HA20421~B14R20C17	9990	30070	110	13099	12301	4361	35	42	42	50	24	48	100	100	0	2211	2056	657	31	182	182	183	13	7	100	100	0	6.435	6.542	6.666	6.883	1.868	7.003	0.866	113	433	84	15086	14133	2.686	13057	2029	12259	1874	1390004
43	1	11	AlexaAntiMouseAb~N/A	HA20421~B43R11C01	11420	59810	110	13097	11265	3519	31	41	41	47	18	38	100	100	0	4405	3815	1374	36	202	202	203	14	6	100	100	0	3.106	3.107	2.979	3.511	2.648	3.254	0.829	89	511	82	17259	14837	1.635	13056	4203	11224	3613	1002600
7	15	20	Hs~MGC:NM_173472.1~uORF:IOH11568~RFU:2471.59	HA20421~B07R20C15	14090	21110	110	13096	12604	7372	58	44	44	48	19	39	100	100	0	1038	1020	403	39	166	166	168	22	13	100	99	0	14.968	14.707	14.894	14.048	1.752	16.797	0.87	104	432	85	13924	13414	3.904	13052	872	12560	854	1310866
26	20	4	Hs~MGC:BC020555.1~uORF:IOH10305~RFU:27039.62	HA20421~B26R04C20	10630	40410	110	13078	13604	2969	21	74	74	1856	2789	150	100	100	0	1836	2157	1071	49	210	210	877	3829	436	6	0	0	7.998	6.949	7.449	7.342	1.43	3.258	0.051	80	464	100	14630	15477	3	13004	1626	13530	1947	1088329
11	17	6	Hs~Ref:NM_005884.2~uORF:IOH2475~RFU:27049.15	HA20421~B11R06C17	14500	22800	140	13075	11159	5614	50	49	49	70	81	115	100	100	0	3900	3235	1281	39	174	174	185	40	21	100	100	0	3.496	3.63	3.869	3.534	2.169	4.105	0.846	161	494	87	16752	14171	1.806	13026	3726	11110	3061	1796562
26	1	11	AlexaAntiMouseAb~N/A	HA20421~B26R11C01	6830	41820	120	13071	11226	5210	46	37	37	42	18	42	100	100	0	4377	3537	1512	42	208	208	208	14	6	100	100	0	3.126	3.361	3.476	3.516	2.348	3.57	0.881	115	570	85	17203	14518	1.645	13034	4169	11189	3329	1291019
31	1	11	AlexaAntiMouseAb~N/A	HA20421~B31R11C01	11340	46340	120	13065	10733	5941	55	43	43	49	24	48	100	100	0	4826	3616	1971	54	220	220	223	24	10	100	100	0	2.827	3.148	3.185	3.71	2.941	3.292	0.873	114	614	91	17628	14086	1.499	13022	4606	10690	3396	1223594
25	19	9	Hs~MGC:BC004876.1~uORF:IOH5626~RFU:19056.43	HA20421~B25R09C19	5890	41390	150	13037	11553	5733	49	41	41	67	69	102	100	100	0	2709	2305	1401	60	218	218	324	328	101	82	78	0	5.217	5.516	5.906	7.851	3.453	5.852	0.715	170	505	89	15487	13599	2.383	12996	2491	11512	2087	1963955
9	2	11	AlexaAntiMouseAb~N/A	HA20421~B09R11C02	2490	23770	110	13036	9947	5381	54	46	46	192	463	241	98	94	0	3693	2930	1493	50	170	170	227	137	60	94	89	0	3.687	3.587	3.631	3.915	2.194	3.727	0.932	112	406	88	16513	12661	1.883	12990	3523	9901	2760	1114018
33	1	11	AlexaAntiMouseAb~N/A	HA20421~B33R11C01	2300	50790	110	13009	10920	4369	40	44	44	49	19	38	100	100	0	3889	3201	1338	41	210	210	210	12	5	100	100	0	3.524	3.636	3.474	4.029	2.083	3.738	0.894	103	482	87	16644	13867	1.817	12965	3679	10876	2991	1124786
12	11	14	Hs~Ref:NM_006792.2~uORF:IOH58223~RFU:19666.42	HA20421~B12R14C11	17810	24400	130	12975	11115	5239	47	45	45	53	30	56	100	100	0	2862	2433	919	37	165	165	172	63	36	100	97	0	4.794	4.881	4.951	4.906	1.904	5.338	0.883	137	479	88	15627	13338	2.261	12930	2697	11070	2268	1522804
27	1	22	ERa~N/A	HA20421~B27R22C01	11300	44000	140	12946	10497	6522	62	38	38	64	117	182	100	100	0	234	234	22	9	206	206	207	12	5	72	53	0	461	373.536	336.041	366.056	2.442	411.924	0.531	165	825	94	12936	10487	8.849	12908	28	10459	28	1731996
22	1	11	AlexaAntiMouseAb~N/A	HA20421~B22R11C01	6790	37280	110	12939	11045	4729	42	39	39	43	16	37	100	100	0	4222	3448	1539	44	192	192	192	15	7	100	100	0	3.201	3.38	3.423	4.014	2.269	3.412	0.927	101	506	86	16930	14262	1.679	12900	4030	11006	3256	1115555
36	22	1	AlexaAntiMouseAb~N/A	HA20421~B36R01C22	20070	48810	110	12930	10672	5491	51	49	49	67	73	108	100	100	0	3839	2815	1651	58	194	194	197	18	9	100	100	0	3.534	4.053	3.844	4.912	3.089	4.084	0.857	103	480	85	16526	13244	1.821	12881	3645	10623	2621	1099260
37	2	18	Hs~Ref:NM_012321.1~uORF:IOH3488~RFU:27080.23	HA20421~B37R18C02	2550	56730	130	12913	12290	3834	31	89	89	141	129	91	100	100	0	4442	4091	1630	39	246	246	264	59	22	100	100	0	3.056	3.173	3.179	3.499	1.908	3.388	0.753	134	543	96	17020	16046	1.612	12824	4196	12201	3845	1646871
36	4	1	ERa~N/A	HA20421~B36R01C04	16470	48810	130	12888	11606	4678	40	44	44	66	69	104	100	100	0	267	656	1407	214	206	206	209	19	9	83	68	0	210.557	25.693	194.579	130.261	5.703	75.929	0.009	131	683	93	12905	12012	7.718	12844	61	11562	450	1520323
29	22	9	Hs~MGC:BC019039.2~uORF:IOH46089~RFU:27074.84	HA20421~B29R09C22	6550	45910	170	12870	12788	3682	28	38	38	45	21	46	100	100	0	4726	4445	1097	24	228	228	229	18	7	100	100	0	2.853	3.023	2.96	3.143	1.701	3.181	0.892	273	748	89	17330	16967	1.512	12832	4498	12750	4217	3491090
33	2	11	AlexaAntiMouseAb~N/A	HA20421~B33R11C02	2500	50800	120	12855	10949	4306	39	43	43	50	27	54	100	100	0	4085	3160	1519	48	213	213	213	13	6	100	100	0	3.309	3.701	3.462	4.484	2.308	3.675	0.89	104	557	92	16684	13853	1.726	12812	3872	10906	2947	1138650
25	1	11	AlexaAntiMouseAb~N/A	HA20421~B25R11C01	2300	41800	110	12852	10708	4228	39	39	39	43	15	34	100	100	0	3738	3049	1388	45	196	196	197	14	7	100	100	0	3.617	3.74	3.63	4.49	2.52	3.817	0.864	105	467	95	16355	13522	1.855	12813	3542	10669	2853	1124300
39	2	11	AlexaAntiMouseAb~N/A	HA20421~B39R11C02	11570	55320	120	12836	10423	5430	52	41	41	49	33	67	100	100	0	4903	3815	2019	52	219	219	221	20	9	100	100	0	2.732	2.887	2.913	3.58	2.367	2.903	0.94	111	500	95	17479	13978	1.45	12795	4684	10382	3596	1156994
40	21	1	AlexaAntiMouseAb~N/A	HA20421~B40R01C21	19880	53280	110	12832	11161	6549	58	48	48	54	25	46	100	100	0	4475	3518	2015	57	209	209	214	21	9	100	100	0	2.997	3.358	3.424	3.977	2.763	3.536	0.869	97	543	94	17050	14422	1.583	12784	4266	11113	3309	1082620
2	15	19	Hs~Ref:NM_001966.2~uORF:IOH62346~RFU:26631.86	HA20421~B02R19C15	9600	16420	130	12830	11727	3821	32	44	44	51	25	49	100	100	0	2303	2081	577	27	165	165	166	11	6	100	99	0	5.98	6.098	6.171	6.365	2.165	6.623	0.853	134	516	94	14924	13599	2.58	12786	2138	11683	1916	1571382
17	2	11	AlexaAntiMouseAb~N/A	HA20421~B17R11C02	2470	32810	110	12830	11177	3859	34	45	45	55	30	54	100	100	0	3768	2978	1544	51	184	184	184	13	7	100	99	0	3.567	3.984	3.728	5.848	2.737	3.759	0.908	108	444	87	16369	13926	1.835	12785	3584	11132	2794	1207122
20	1	11	AlexaAntiMouseAb~N/A	HA20421~B20R11C01	15830	32790	110	12825	10674	5268	49	39	39	50	99	198	97	97	0	4085	3141	1601	50	180	180	186	39	20	100	96	0	3.274	3.592	3.554	3.856	1.494	3.491	0.933	80	412	100	16691	13596	1.711	12786	3905	10635	2961	853910
44	2	1	AlexaAntiMouseAb~N/A	HA20421~B44R01C02	16120	57790	110	12790	10830	4859	44	44	44	55	39	70	100	100	0	4722	3727	1769	47	217	217	221	21	9	100	100	0	2.829	3.073	3.06	3.712	2.357	3.13	0.9	97	494	90	17251	14296	1.5	12746	4505	10786	3510	1050554
44	1	1	AlexaAntiMouseAb~N/A	HA20421~B44R01C01	15920	57790	100	12771	10693	4590	42	42	42	47	18	38	100	100	0	4735	3840	1525	39	214	214	220	24	10	100	100	0	2.816	2.937	3.004	3.01	1.861	3.095	0.906	90	485	85	17250	14277	1.493	12729	4521	10651	3626	962411
40	20	6	Hs~MGC:BC006105.1~uORF:IOH5992~RFU:27065.72	HA20421~B40R06C20	19640	54280	190	12758	12755	4664	36	76	76	220	370	168	100	100	0	5281	4866	1481	30	248	248	801	1062	132	91	90	0	2.52	2.746	2.507	3.138	2.808	3.134	0.697	220	866	44	17715	17297	1.333	12682	5033	12679	4618	2806137
27	2	22	ERa~N/A	HA20421~B27R22C02	11510	44000	150	12744	10909	6526	59	38	38	57	89	156	100	100	0	227	231	23	9	204	204	204	12	5	72	47	0	552.435	402.63	408.529	401.225	2.636	444.714	0.448	174	822	86	12729	10898	9.11	12706	23	10871	27	1898224
21	14	18	Hs~MGC:BC051733.1~uORF:IOH56370~RFU:6247.31	HA20421~B21R18C14	4910	38720	120	12731	12704	8155	64	43	43	51	26	50	100	100	0	1044	1004	464	46	203	203	221	49	22	96	91	0	15.087	15.806	16.343	15.433	2.046	17.694	0.881	123	471	88	13529	13462	3.915	12688	841	12661	801	1562562
48	1	16	Hs~Ref:NM_005409.3~CAT_PHC1695~RFU:2822.81	HA20421~B48R16C01	15910	65260	120	12719	12428	3471	27	163	163	535	785	146	100	100	0	214	218	23	10	379	379	665	588	88	0	0	0	-76.097	-76.18	1501.57	1501.57	1	-56.206	0.079	110	595	90	12391	12104	Error	12556	-165	12265	-161	1367116
16	3	16	Hs~Ref:NM_002608.1~CAT_PHG0046~RFU:1242.68	HA20421~B16R16C03	16200	29280	120	12714	12731	5000	39	39	39	44	18	40	100	100	0	166	169	10	5	164	164	165	12	7	21	4	0	6337.5	2538.4	1620.36	1669.13	2.683	4463.99	0.017	116	596	82	12677	12697	12.63	12675	2	12692	5	1476745
10	1	16	Hs~Ref:NM_001039468.1~CAT:PV3878~RFU:14855.12	HA20421~B10R16C01	6810	24770	130	12707	12042	4560	37	42	42	47	19	40	100	100	0	2535	2131	952	44	170	170	170	11	6	100	100	0	5.355	6.119	5.985	7.534	2.566	6.381	0.82	136	609	89	15030	13961	2.421	12665	2365	12000	1961	1637753
20	14	6	Hs~Ref:NM_002363.1~uORF:IOH10928~RFU:6253.26	HA20421~B20R06C14	18420	31790	140	12686	11236	5299	47	53	53	111	182	163	100	100	0	1978	1462	798	54	179	179	214	123	57	84	78	0	7.022	8.716	8.394	12.757	2.612	8.404	0.894	155	559	91	14432	12466	2.812	12633	1799	11183	1283	1741560
39	22	3	Hs~Ref:NM_014481.2~uORF:IOH4887~RFU:26902.04	HA20421~B39R03C22	15560	53720	170	12670	12243	8358	68	43	43	78	160	205	100	100	0	677	1878	1650	87	242	242	277	110	39	84	58	0	29.028	7.457	12.968	14.906	2.812	6.634	0.844	238	769	90	13062	13836	4.859	12627	435	12200	1636	2913859
14	15	3	Hs~Ref:NM_173080.1~uORF:IOH34934~RFU:27075.25	HA20421~B14R03C15	9600	26660	130	12654	11522	3934	34	51	51	70	55	78	100	99	0	6751	6110	1893	30	182	182	189	41	21	100	100	0	1.919	1.935	1.986	2.007	2.599	2.065	0.826	142	502	89	19172	17399	0.94	12603	6569	11471	5928	1636095
13	18	9	Hs~MGC:BC008902.2~uORF:IOH46064~RFU:20152.08	HA20421~B13R09C18	5720	27930	120	12644	11209	4258	37	42	42	56	40	71	100	100	0	3356	2864	1712	59	180	180	184	19	10	100	100	0	3.968	4.161	4.266	5.29	2.835	4.376	0.654	133	489	90	15778	13851	1.988	12602	3176	11167	2684	1490820
14	18	20	Hs~MGC:BC041799.1~uORF:IOH25876~RFU:14978.11	HA20421~B14R20C18	10190	30070	110	12633	12688	4810	37	44	44	50	23	46	100	100	0	2110	1865	603	32	179	179	180	13	7	100	100	0	6.519	7.499	7.584	7.858	1.707	7.873	0.92	115	454	90	14520	14330	2.705	12589	1931	12644	1686	1459128
29	13	18	Hs~Ref:NM_181714.1~uORF:IOH26433~RFU:9179.91	HA20421~B29R18C13	4760	47690	120	12598	12818	6605	51	43	43	49	23	46	100	100	0	1512	1470	758	51	228	228	231	21	9	97	96	0	9.778	10.286	10.379	12.379	2.34	10.502	0.871	127	455	88	13839	14017	3.29	12555	1284	12775	1242	1627898
44	22	1	AlexaAntiMouseAb~N/A	HA20421~B44R01C22	20120	57780	110	12593	10228	4777	46	47	47	56	27	48	100	98	0	4096	3379	1493	44	219	219	220	24	10	100	98	0	3.236	3.222	3.255	3.23	1.659	3.35	0.908	80	443	100	16423	13341	1.694	12546	3877	10181	3160	818209
12	12	14	Hs~Ref:NM_006792.2~uORF:IOH58223~RFU:19012.93	HA20421~B12R14C12	18010	24400	130	12591	11450	4962	43	41	41	45	16	35	100	100	0	2776	2831	2132	75	163	163	163	10	6	100	100	0	4.803	4.276	5.125	5.164	2.271	4.304	0.624	137	513	89	15163	14077	2.264	12550	2613	11409	2668	1568639
8	5	8	Hs~Ref:NM_001896.1~N/A~RFU:11244.65	HA20421~B08R08C05	16590	18680	160	12585	10760	6575	61	44	44	79	151	191	100	100	0	2463	2007	933	46	174	174	203	80	39	100	99	0	5.479	5.846	5.971	5.486	1.969	7.137	0.776	205	389	54	14830	12549	2.454	12541	2289	10716	1833	2205871
3	13	8	Hs~MGC:BC008364.1~uORF:IOH5969~RFU:27061.58	HA20421~B03R08C13	13700	14210	140	12564	11506	5026	43	49	49	102	154	150	100	100	0	2818	2378	835	35	168	168	181	35	19	100	100	0	4.723	5.184	5.14	5.364	1.73	5.643	0.895	177	520	94	15165	13667	2.24	12515	2650	11457	2210	2036640
4	2	8	Hs~MGC:BC044632.1~uORF:IOH62971~RFU:27035.47	HA20421~B04R08C02	15990	14200	150	12564	11623	4430	38	51	51	58	27	46	100	100	0	4764	4154	1381	33	163	163	211	128	60	99	98	0	2.72	2.9	2.838	2.991	1.592	3.052	0.914	158	449	88	17114	15563	1.443	12513	4601	11572	3991	1836482
21	11	20	Hs~Ref:NM_006791.1~uORF:IOH3901~RFU:27078.57	HA20421~B21R20C11	4310	39120	130	12560	11296	3981	35	46	46	61	43	70	100	100	0	3401	3171	973	30	208	208	213	26	12	100	100	0	3.919	3.797	3.795	3.868	1.475	3.965	0.929	141	476	92	15707	14213	1.971	12514	3193	11250	2963	1592691
47	7	16	Hs~Ref:NM_139016.2~uORF:IOH27635~RFU:24942.2	HA20421~B47R16C07	12610	65290	140	12545	11725	4781	40	53	53	145	249	171	100	100	0	2739	2299	1010	43	204	204	294	152	51	94	88	0	4.928	5.571	5.707	6.732	2.628	6.364	0.744	152	602	87	15027	13767	2.301	12492	2535	11672	2095	1782211
31	8	7	Hs~MGC:BC024291.1~uORF:IOH14775~RFU:11326.04	HA20421~B31R07C08	12740	45540	120	12526	11600	7435	64	36	36	39	10	25	100	100	0	1918	1797	943	52	212	212	212	14	6	96	96	0	7.321	7.296	6.988	8.109	2.575	7.919	0.892	119	497	89	14196	13149	2.872	12490	1706	11564	1585	1380367
28	21	1	AlexaAntiMouseAb~N/A	HA20421~B28R01C21	19850	39790	100	12508	9715	4949	50	53	53	65	42	64	100	100	0	3816	3262	1279	39	178	178	179	15	8	100	100	0	3.424	3.133	3.331	2.905	2.415	3.535	0.849	93	462	91	16093	12746	1.776	12455	3638	9662	3084	903453
3	3	13	Hs~Ref:NM_023938.4~uORF:IOH3759~RFU:27061.99	HA20421~B03R13C03	11700	15210	140	12493	11110	3930	35	62	62	144	213	147	100	100	0	5123	4539	1441	31	180	180	189	24	12	100	100	0	2.515	2.535	2.634	2.544	1.811	2.651	0.884	167	488	93	17374	15407	1.33	12431	4943	11048	4359	1855313
40	2	1	AlexaAntiMouseAb~N/A	HA20421~B40R01C02	16070	53280	110	12484	9747	5568	57	47	47	78	90	115	99	99	0	4365	3517	1903	54	230	230	233	22	9	100	99	0	3.008	2.951	3.013	3.206	2.58	3.07	0.901	101	480	94	16572	12987	1.589	12437	4135	9700	3287	984432
1	20	20	Hs~Ref:XM_003960444.1~uORF:IOH50171~RFU:27030.91	HA20421~B01R20C20	6070	16630	140	12479	11538	4289	37	54	54	73	68	93	100	100	0	4057	3422	1326	38	170	170	173	19	10	100	98	0	3.197	3.531	3.526	4.167	2.329	3.638	0.888	160	593	92	16312	14736	1.677	12425	3887	11484	3252	1846000
4	21	16	Hs~MGC:BC020810.1~uORF:IOH27927~RFU:27040.44	HA20421~B04R16C21	19800	15790	130	12467	14084	6220	44	62	62	78	49	62	100	100	0	3765	3916	3067	78	151	151	151	12	7	100	100	0	3.432	3.724	3.734	4.296	2.339	4.625	0.366	140	405	94	16019	17787	1.779	12405	3614	14022	3765	1971729
43	15	4	Hs~MGC:BC042606.1~uORF:IOH26783~RFU:3922.59	HA20421~B43R04C15	14230	58430	140	12461	18354	15967	86	49	49	70	96	137	100	100	0	401	607	363	59	209	209	211	15	7	99	97	0	64.646	45.992	52.178	49.889	1.809	50.249	0.804	178	419	54	12604	18703	6.014	12412	192	18305	398	3267035
43	9	6	Hs~Ref:NM_000975.2~uORF:IOH1740~RFU:6959.22	HA20421~B43R06C09	13020	58820	110	12458	12108	6333	52	46	46	55	35	63	100	100	0	1188	1024	332	32	215	215	219	18	8	100	99	0	12.756	14.91	15.203	14.951	2.25	18.447	0.731	111	390	87	13385	12871	3.673	12412	973	12062	809	1343938
14	20	22	ERa~N/A	HA20421~B14R22C20	10590	30470	130	12453	12448	3739	30	40	40	47	23	48	100	100	0	209	210	17	8	176	176	175	12	6	87	79	0	376.152	364.941	385.73	421.769	2.108	382.886	0.571	124	672	79	12446	12442	8.555	12413	33	12408	34	1543499
16	20	14	Hs~MGC:BC002559.1~uORF:IOH4053~RFU:22702.32	HA20421~B16R14C20	19610	28880	130	12453	11093	5270	47	43	43	56	45	80	100	100	0	1291	1175	476	40	161	161	161	13	8	99	99	0	10.982	10.897	10.791	11.689	2.108	11.667	0.876	133	550	92	13540	12064	3.457	12410	1130	11050	1014	1475435
14	16	17	Hs~MGC:BC031549.1~uORF:IOH21007~RFU:13372.36	HA20421~B14R17C16	9790	29470	110	12445	13001	2595	19	45	45	64	60	93	100	100	0	4068	3914	556	14	183	183	190	52	27	100	100	0	3.192	3.473	3.278	3.462	1.284	3.64	0.871	80	367	100	16285	16687	1.674	12400	3885	12956	3731	1040084
14	14	16	Hs~MGC:BC022543.1~uORF:IOH55985~RFU:10809.76	HA20421~B14R16C14	9400	29270	130	12428	11019	5092	46	42	42	50	25	50	100	100	0	2427	1974	797	40	179	179	178	10	5	100	100	0	5.51	6.115	5.862	6.994	2.289	6.479	0.901	125	474	96	14634	12772	2.462	12386	2248	10977	1795	1377376
9	22	2	Hs~Ref:NM_014303.2~uORF:IOH21738~RFU:27093.07	HA20421~B09R02C22	6470	21980	160	12424	12416	4021	32	43	43	50	26	52	100	100	0	3017	2694	1134	42	169	169	179	54	30	99	99	0	4.347	4.9	5.077	5.463	1.809	4.931	0.8	246	716	76	15229	14898	2.12	12381	2848	12373	2525	3054445
12	1	4	Hs~MGC:BC011842.2~uORF:IOH14099~RFU:11952.58	HA20421~B12R04C01	15810	22400	140	12418	11135	5462	49	49	49	65	48	73	100	100	0	3890	2999	1595	53	165	165	177	40	22	100	100	0	3.321	3.912	3.969	4.674	1.919	3.94	0.916	165	711	92	16094	13920	1.731	12369	3725	11086	2834	1837348
35	2	11	AlexaAntiMouseAb~N/A	HA20421~B35R11C02	11560	50800	110	12364	10431	4177	40	39	39	43	13	30	100	100	0	4257	3616	1522	42	218	218	221	17	7	100	100	0	3.051	3.058	2.99	3.283	1.874	3.075	0.933	99	467	89	16364	13790	1.61	12325	4039	10392	3398	1032621
24	22	1	AlexaAntiMouseAb~N/A	HA20421~B24R01C22	20050	35280	110	12339	10182	4740	46	43	43	53	27	50	100	100	0	3720	3025	1404	46	173	173	173	15	8	98	98	0	3.467	3.555	3.486	4.211	2.853	3.689	0.894	95	473	75	15843	12991	1.794	12296	3547	10139	2852	967244
11	16	2	Hs~MGC:BC007228.1~uORF:IOH6059~RFU:11106.41	HA20421~B11R02C16	14330	21990	130	12332	11946	3102	25	45	45	53	24	45	100	100	0	1712	1596	450	28	166	166	166	10	6	100	100	0	7.948	8.322	7.899	9.123	1.935	8.842	0.837	135	535	96	13833	13331	2.991	12287	1546	11901	1430	1612674
30	2	11	AlexaAntiMouseAb~N/A	HA20421~B30R11C02	7040	46300	110	12327	9589	4749	49	36	36	39	10	25	100	100	0	4359	3578	1584	44	228	228	230	14	6	100	100	0	2.975	2.852	2.889	2.878	2.21	2.987	0.917	101	449	88	16422	12903	1.573	12291	4131	9553	3350	968482
3	14	8	Hs~MGC:BC008364.1~uORF:IOH5969~RFU:19657.3	HA20421~B03R08C14	13900	14210	150	12326	10914	5169	47	48	48	81	127	156	100	100	0	2719	2171	917	42	165	165	172	27	15	100	100	0	4.807	5.417	5.487	5.824	1.697	5.694	0.916	182	587	89	14832	12872	2.265	12278	2554	10866	2006	1986433
47	8	16	Hs~Ref:NM_139016.2~uORF:IOH27635~RFU:23259.7	HA20421~B47R16C08	12810	65290	130	12322	11543	3296	28	64	64	302	526	174	100	100	0	2893	2597	866	33	438	438	423	180	42	92	91	0	4.993	5.317	5.129	5.339	1.926	5.432	0.785	142	527	87	14713	13638	2.32	12258	2455	11479	2159	1639149
32	15	16	Hs~Ref:NM_001005373.1~uORF:IOH55653~RFU:27049.98	HA20421~B32R16C15	18660	47320	170	12315	12476	5096	40	58	58	76	64	84	100	100	0	5882	5316	1481	27	193	193	200	35	17	100	100	0	2.155	2.424	2.391	2.403	1.779	2.818	0.802	268	487	76	17946	17541	1.107	12257	5689	12418	5123	3343446
16	15	9	Hs~Ref:NM_201998.1~uORF:IOH56887~RFU:27037.96	HA20421~B16R09C15	18610	27870	130	12312	11495	5318	46	44	44	64	81	126	100	100	0	1884	1629	538	33	167	167	168	15	8	100	100	0	7.145	7.832	8.266	7.911	2.122	8.863	0.854	141	507	96	13985	12913	2.837	12268	1717	11451	1462	1620747
2	16	8	Hs~Ref:NM_017503.2~uORF:IOH12519~RFU:27073.18	HA20421~B02R08C16	9790	14220	130	12306	11350	3486	30	46	46	74	111	150	100	100	0	4487	3963	1400	35	169	169	175	32	18	100	100	0	2.839	2.979	2.975	3.317	2.067	3.101	0.831	150	434	90	16578	15098	1.506	12260	4318	11304	3794	1702469
11	15	2	Hs~MGC:BC007228.1~uORF:IOH6059~RFU:11173.32	HA20421~B11R02C15	14130	22000	140	12304	12075	3948	32	47	47	50	22	44	100	100	0	1713	1519	475	31	165	165	165	10	6	100	100	0	7.918	8.883	8.634	9.785	1.97	9.306	0.886	146	595	93	13805	13382	2.985	12257	1548	12028	1354	1762942
3	8	4	Hs~MGC:BC011924.1~uORF:IOH12682~RFU:18274.49	HA20421~B03R04C08	12690	13410	140	12297	11078	3469	31	45	45	61	55	90	100	100	0	3286	2976	1107	37	165	165	175	34	19	99	97	0	3.926	3.925	3.75	4.49	1.917	3.917	0.929	148	462	91	15373	13844	1.973	12252	3121	11033	2811	1639528
41	13	13	Hs~MGC:BC015514.1~uORF:IOH11731~RFU:23522.9	HA20421~B41R13C13	4770	60220	150	12284	10638	5293	49	54	54	133	228	171	100	100	0	3359	2974	2193	73	202	202	208	26	12	98	94	0	3.874	3.818	4.649	5.688	3.355	4.038	0.582	182	600	94	15387	13356	1.954	12230	3157	10584	2772	1936127
27	11	8	Hs~Ref:NM_145109.1~uORF:IOH21715~RFU:27056.19	HA20421~B27R08C11	13300	41230	160	12257	12185	3732	30	38	38	42	16	38	100	100	0	6575	6176	1638	26	201	201	201	12	5	100	100	0	1.917	2.033	2.034	2.037	1.666	2.22	0.814	230	548	89	18593	18122	0.939	12219	6374	12147	5975	2802491
25	12	2	Hs~MGC:BC002488.1~uORF:IOH3970~RFU:15991.54	HA20421~B25R02C12	4500	39990	190	12244	11133	6580	59	39	39	58	91	156	100	100	0	2086	2635	2837	107	209	209	212	32	15	99	93	0	6.502	4.573	9.042	8.062	2.736	4.631	0.445	229	811	57	14082	13520	2.701	12205	1877	11094	2426	2549538
31	13	18	Hs~MGC:BC036056.1~uORF:IOH27184~RFU:20666.11	HA20421~B31R18C13	13750	47740	120	12242	12739	4643	36	44	44	58	51	87	100	100	0	2453	2183	769	35	234	234	274	116	42	98	96	0	5.497	6.514	6.156	7.234	2.15	6.837	0.877	120	510	85	14417	14644	2.459	12198	2219	12695	1949	1528674
12	2	4	Hs~MGC:BC011842.2~uORF:IOH14099~RFU:13699.51	HA20421~B12R04C02	16010	22390	130	12238	11604	4295	37	55	55	70	40	57	100	100	0	4201	3716	1179	31	170	170	185	41	22	100	100	0	3.022	3.257	3.276	3.282	1.52	3.426	0.926	138	492	85	16214	15095	1.596	12183	4031	11549	3546	1601304
36	1	11	AlexaAntiMouseAb~N/A	HA20421~B36R11C01	15860	50820	100	12193	10465	3652	34	39	39	42	14	33	100	100	0	4354	3737	1326	35	214	214	216	16	7	100	100	0	2.936	2.959	2.989	3.244	2.04	3.054	0.892	91	456	83	16294	13949	1.554	12154	4140	10426	3523	952299
3	4	13	Hs~Ref:NM_023938.4~uORF:IOH3759~RFU:27069.45	HA20421~B03R13C04	11900	15210	140	12191	11386	3689	32	52	52	98	154	157	100	100	0	4892	4282	1474	34	173	173	182	25	13	100	100	0	2.572	2.758	2.672	2.998	1.887	2.829	0.884	162	515	91	16858	15443	1.363	12139	4719	11334	4109	1844492
16	4	16	Hs~Ref:NM_002608.1~CAT_PHG0046~RFU:1215.13	HA20421~B16R16C04	16400	29280	120	12190	11306	4024	35	38	38	41	11	26	100	100	0	170	169	11	6	170	170	169	11	6	10	3	0	100000	-11268	1935.88	2387.18	2.95	6788.39	0.005	106	538	83	12152	11267	16.61	12152	0	11268	-1	1198459
39	3	10	Hs~Ref:NM_007172.2~uORF:IOH40805~RFU:27080.23	HA20421~B39R10C03	11760	55120	130	12178	11778	5453	46	45	45	62	53	85	100	100	0	3837	3356	1402	41	221	221	221	14	6	100	100	0	3.355	3.743	3.692	3.932	2.058	4.028	0.859	130	487	96	15749	14868	1.746	12133	3616	11733	3135	1531161
7	16	20	Hs~MGC:NM_173472.1~uORF:IOH11568~RFU:2556.7	HA20421~B07R20C16	14290	21110	110	12171	13028	6846	52	38	38	45	20	44	100	100	0	1042	1029	391	37	164	164	165	11	6	100	100	0	13.819	15.017	15.765	14.648	1.47	16.368	0.912	101	461	82	13011	13855	3.789	12133	878	12990	865	1315834
23	18	16	Hs~Ref:NM_000882.1~uORF:IOH29844~RFU:11823.31	HA20421~B23R16C18	14720	38300	130	12147	12572	8779	69	45	45	58	38	65	100	100	0	3092	2709	1222	45	181	181	181	12	6	99	99	0	4.157	4.955	4.688	4.572	2.92	6.403	0.743	123	535	91	15013	15055	2.056	12102	2911	12527	2528	1546394
37	20	22	ERa~N/A	HA20421~B37R22C20	6160	57520	120	12141	11250	4086	36	43	43	62	63	101	100	100	0	254	264	72	27	198	198	199	14	7	93	84	0	216.036	169.803	210.294	194.945	1.881	187.727	0.338	128	605	90	12154	11273	7.755	12098	56	11207	66	1439948
21	13	18	Hs~MGC:BC051733.1~uORF:IOH56370~RFU:6741.26	HA20421~B21R18C13	4710	38720	130	12131	11780	6775	57	47	47	55	31	56	100	100	0	1097	1107	543	49	208	208	233	58	24	96	91	0	13.593	13.051	13.048	13.951	1.759	13.822	0.877	124	505	95	12973	12632	3.765	12084	889	11733	899	1460662
12	17	4	Hs~MGC:BC033708.1~uORF:IOH21753~RFU:27011.02	HA20421~B12R04C17	19010	22400	150	12121	10441	4398	42	48	48	152	399	262	100	100	0	3341	2916	1232	42	172	172	242	199	82	100	100	0	3.81	3.788	3.94	3.845	1.465	4.012	0.883	173	495	90	15242	13137	1.93	12073	3169	10393	2744	1806291
41	10	9	Hs~Ref:NM_138779.1~uORF:IOH10711~RFU:21850.74	HA20421~B41R09C10	4170	59410	130	12118	11429	4963	43	42	42	49	27	55	100	100	0	5448	4673	1680	35	213	213	222	33	14	100	100	0	2.307	2.553	2.649	2.637	1.969	2.781	0.87	140	465	96	17311	15847	1.206	12076	5235	11387	4460	1600058
16	1	11	AlexaAntiMouseAb~N/A	HA20421~B16R11C01	15810	28280	110	12117	11197	3878	34	43	43	48	18	37	100	100	0	4029	3331	1371	41	169	169	169	12	7	100	100	0	3.128	3.528	3.422	4.093	2.411	3.694	0.816	91	512	92	15934	14316	1.645	12074	3860	11154	3162	1018950
2	6	20	Hs~Ref:NM_003792.1~uORF:IOH10852~RFU:15337.31	HA20421~B02R20C06	7790	16620	120	12080	11035	3427	31	48	48	67	65	97	100	100	0	1922	1756	495	28	178	178	352	444	126	96	88	0	6.899	6.963	6.931	7.225	1.503	7.306	0.91	128	467	85	13776	12565	2.786	12032	1744	10987	1578	1412459
23	13	8	Hs~MGC:BC014394.1~uORF:IOH22936~RFU:27001.08	HA20421~B23R08C13	13720	36700	130	12072	11149	4201	37	51	51	106	206	194	100	100	0	3525	3120	1240	39	209	209	262	129	49	98	94	0	3.625	3.812	3.724	4.318	2.281	4.086	0.811	135	416	91	15337	14009	1.858	12021	3316	11098	2911	1505182
15	3	18	Hs~MGC:BC032852.2~uORF:IOH27153~RFU:26174.37	HA20421~B15R18C03	11680	29700	150	12072	11571	3692	31	52	52	383	711	185	100	100	0	3216	2821	1109	39	190	190	319	220	68	98	97	0	3.972	4.378	4.189	4.906	1.932	4.471	0.862	177	546	88	15046	14150	1.99	12020	3026	11519	2631	2047997
9	12	5	Hs~Ref:NM_014891.1~uORF:IOH4282~RFU:27030.91	HA20421~B09R05C12	4500	22570	140	12061	11505	3453	30	54	54	77	80	103	100	100	0	3289	3341	1279	38	184	184	204	54	26	99	99	0	3.867	3.627	3.795	3.878	2.18	4.069	0.692	145	522	91	15112	14608	1.951	12007	3105	11451	3157	1668220
40	16	4	Hs~Ref:NM_022140.2~uORF:IOH38016~RFU:27063.65	HA20421~B40R04C16	18860	53880	110	12056	11875	2954	24	118	118	1454	2529	173	100	97	0	3454	3435	272	7	235	235	722	900	124	100	100	0	3.709	3.674	3.67	3.549	1.309	4.067	0.838	80	514	100	15157	14957	1.891	11938	3219	11757	3200	950035
37	5	16	Hs~Ref:NM_001105.2~CAT:PV4877~RFU:6961.18	HA20421~B37R16C05	3140	56330	110	12051	11113	6605	59	44	44	53	26	49	100	100	0	4677	3950	1824	46	212	212	229	50	21	100	97	0	2.689	2.961	3.234	2.74	2.525	3.332	0.865	99	434	96	16472	14807	1.427	12007	4465	11069	3738	1100191
42	11	3	Hs~Ref:NM_032141.1~uORF:IOH43707~RFU:27032.99	HA20421~B42R03C11	8890	58210	160	12045	11164	5131	45	81	81	248	447	180	100	100	0	3073	2328	1256	53	227	227	244	51	20	97	96	0	4.204	5.275	5.598	7.202	2.632	5.322	0.808	191	516	57	14810	13184	2.072	11964	2846	11083	2101	2132267
15	9	12	Hs~MGC:BC034718.1~uORF:IOH21418~RFU:6216.85	HA20421~B15R12C09	12890	28500	140	12027	10412	4584	44	47	47	110	179	162	100	100	0	2808	2461	812	32	184	184	222	86	38	100	100	0	4.566	4.552	4.554	4.462	1.589	5.096	0.89	149	583	95	14604	12642	2.191	11980	2624	10365	2277	1551460
29	18	12	Hs~Ref:NM_017592.1~uORF:IOH44564~RFU:27052.05	HA20421~B29R12C18	5760	46490	110	12022	11919	2263	18	114	114	2283	3391	148	100	98	0	6265	6614	960	14	265	265	1894	4498	237	100	1	0	1.985	1.859	1.974	1.841	1.315	0.811	0.26	80	529	100	17908	18154	0.989	11908	6000	11805	6349	953517
8	8	8	Hs~Ref:NM_003146.2~uORF:IOH4845~RFU:9347.75	HA20421~B08R08C08	17190	18680	140	12016	10482	4837	46	51	51	92	123	133	100	100	0	4101	3414	1437	42	168	168	178	36	20	100	100	0	3.042	3.213	3.177	3.392	1.844	3.46	0.856	159	520	86	15898	13677	1.605	11965	3933	10431	3246	1666643
47	1	11	AlexaAntiMouseAb~N/A	HA20421~B47R11C01	11410	64280	120	12014	10512	4758	45	49	49	54	26	48	100	100	0	4518	3469	1879	54	191	191	226	87	38	98	92	0	2.765	3.192	2.999	4	3.219	3.254	0.844	107	583	84	16292	13741	1.467	11965	4327	10463	3278	1124741
23	14	18	Hs~Ref:NM_207428.1~uORF:IOH58670~RFU:3049.64	HA20421~B23R18C14	13920	38710	120	12011	11682	6463	55	37	37	42	12	28	100	100	0	793	750	217	28	182	182	184	34	18	100	100	0	19.597	20.502	20.243	18.416	1.587	23.906	0.857	105	545	92	12585	12213	4.293	11974	611	11645	568	1226614
26	6	4	Hs~Ref:NM_024093.1~uORF:IOH3089~RFU:20668.57	HA20421~B26R04C06	7830	40430	140	11999	11187	4333	38	41	41	49	29	59	100	100	0	2295	1968	637	32	211	211	261	144	55	100	93	0	5.738	6.344	6.208	6.522	1.595	6.957	0.877	154	520	90	14042	12903	2.521	11958	2084	11146	1757	1722839
22	3	21	Hs~Ref:NM_138300.3~uORF:IOH22981~RFU:26576.74	HA20421~B22R21C03	7190	39300	170	11990	10162	6274	61	41	41	55	62	112	100	100	0	4906	4200	2534	60	198	198	215	94	43	100	99	0	2.538	2.529	2.475	2.52	1.73	2.611	0.918	224	577	93	16657	14123	1.344	11949	4708	10121	4002	2276249
19	1	18	Hs~MGC:BC016330.1~uORF:IOH14709~RFU:23997.15	HA20421~B19R18C01	11300	34210	140	11975	10827	5162	47	47	47	66	61	92	100	100	0	2586	1955	978	50	179	179	181	17	9	100	100	0	4.956	6.07	6.095	7.417	2.683	6.458	0.811	160	715	93	14335	12556	2.309	11928	2407	10780	1776	1732349
9	11	5	Hs~Ref:NM_014891.1~uORF:IOH4282~RFU:27019.31	HA20421~B09R05C11	4300	22580	140	11973	11347	4400	38	61	61	81	78	96	100	100	0	3483	3045	1061	34	189	189	223	68	30	98	98	0	3.616	3.952	4.032	4.34	2.067	4.254	0.861	159	520	92	15206	14142	1.855	11912	3294	11286	2856	1804180
22	10	13	Hs~MGC:BC033792.1~uORF:IOH21794~RFU:12856.79	HA20421~B22R13C10	8600	37690	160	11969	9396	5402	57	39	39	53	60	113	100	100	0	4038	3000	1951	65	198	198	205	35	17	99	98	0	3.107	3.339	3.234	4.274	2.057	3.262	0.899	199	553	93	15770	12159	1.635	11930	3840	9357	2802	1869745
29	21	21	Hs~Ref:NP_000600.1~CAT_PHC1361~RFU:3422.84	HA20421~B29R21C21	6340	48310	160	11968	12037	4433	36	40	40	45	16	35	100	100	0	282	289	63	21	229	229	229	14	6	94	82	0	225.057	199.95	240.333	233.734	1.83	217.649	0.328	250	566	79	11981	12057	7.814	11928	53	11997	60	3009345
23	15	19	Hs~Ref:NM_053030.2~uORF:IOH44055~RFU:18894	HA20421~B23R19C15	14130	38930	180	11963	19099	15136	79	42	42	53	36	67	100	100	0	492	979	817	83	182	182	183	12	6	85	74	0	38.455	23.911	26.57	53.999	3.484	21.904	0.89	251	698	84	12231	19854	5.265	11921	310	19057	797	4793741
20	13	18	Hs~MGC:BC015505.1~uORF:IOH9981~RFU:27021.8	HA20421~B20R18C13	18230	34190	120	11951	12200	3742	30	129	129	268	328	122	100	100	0	2427	2289	487	21	309	309	733	868	118	93	84	0	5.582	6.096	5.929	6.05	1.49	7.861	0.528	133	475	94	13940	14051	2.481	11822	2118	12071	1980	1622618
16	6	8	Hs~Ref:NM_003582.1~N/A~RFU:12680.26	HA20421~B16R08C06	16800	27680	130	11940	10925	3635	33	50	50	72	80	111	100	100	0	1697	1528	601	39	182	182	202	44	21	95	95	0	7.848	8.079	7.741	9.842	2.679	8.337	0.842	121	521	88	13405	12221	2.972	11890	1515	10875	1346	1321879
28	9	3	Hs~Ref:NM_005678.3~uORF:IOH45840~RFU:27014.75	HA20421~B28R03C09	17430	40190	110	11937	11696	1581	13	92	92	1427	2382	166	100	100	0	4448	4402	247	5	225	225	1236	1783	144	100	98	0	2.805	2.778	2.815	2.757	1.146	2.606	0.772	80	417	100	16068	15781	1.488	11845	4223	11604	4177	935712
45	9	12	Hs~MGC:BC033710.1~uORF:IOH21756~RFU:20329.12	HA20421~B45R12C09	3960	64530	130	11932	11112	3537	31	48	48	64	46	71	100	100	0	6437	5623	2132	37	197	197	203	23	11	100	100	0	1.904	2.039	1.894	2.331	2.482	2.111	0.797	150	522	90	18124	16490	0.929	11884	6240	11064	5426	1666777
31	13	19	Hs~MGC:BC001304.1~uORF:IOH45994~RFU:27061.58	HA20421~B31R19C13	13760	47960	190	11931	11622	4451	38	42	42	90	287	318	100	100	0	1117	1151	350	30	231	231	259	97	37	99	98	0	13.419	12.587	12.834	12.571	1.435	13.714	0.828	273	678	88	12775	12500	3.746	11889	886	11580	920	3172856
27	22	8	Hs~Ref:NM_007080.1~uORF:IOH10074~RFU:27088.1	HA20421~B27R08C22	15500	41190	110	11924	12230	2188	17	45	45	126	299	237	100	100	0	4665	4399	1015	23	197	197	222	66	29	100	100	0	2.659	2.9	2.823	3.008	1.382	2.877	0.826	80	372	100	16347	16387	1.411	11879	4468	12185	4202	978395
32	8	7	Hs~Ref:NM_007177.1~uORF:IOH10203~RFU:27012.68	HA20421~B32R07C08	17260	45510	120	11913	11727	2113	18	103	103	191	216	113	100	100	0	4883	4549	1087	23	366	366	1753	2488	141	90	5	0	2.615	2.779	2.676	2.965	1.781	3.187	0.626	114	416	89	16327	15807	1.387	11810	4517	11624	4183	1336909
13	15	19	Hs~Ref:XM_374177.2~uORF:IOH43615~RFU:27068.62	HA20421~B13R19C15	5120	29940	130	11909	10731	3963	36	44	44	70	104	148	100	100	0	4313	3753	1261	33	181	181	189	26	13	100	100	0	2.871	2.992	3.003	3.068	2.056	3.226	0.846	150	499	89	15997	14259	1.522	11865	4132	10687	3572	1609590
24	1	11	AlexaAntiMouseAb~N/A	HA20421~B24R11C01	15850	37280	110	11899	9662	4416	45	42	42	47	20	42	100	100	0	4079	3499	1199	34	184	184	186	16	8	100	100	0	3.044	2.902	3.117	2.746	1.943	3.143	0.923	97	472	89	15752	12935	1.606	11857	3895	9620	3315	937197
41	1	11	AlexaAntiMouseAb~N/A	HA20421~B41R11C01	2370	59820	120	11893	9584	4822	50	46	46	54	35	64	100	100	0	3779	2931	1639	55	212	212	212	15	7	98	97	0	3.321	3.508	3.32	5.06	3.53	3.572	0.848	113	533	93	15414	12257	1.732	11847	3567	9538	2719	1083003
22	22	17	Hs~Ref:NM_013264.2~uORF:IOH45462~RFU:4279.79	HA20421~B22R17C22	11000	38480	110	11882	11405	5151	45	44	44	69	108	156	100	100	0	1288	1194	473	39	190	190	191	13	6	100	100	0	10.781	11.316	11.324	11.994	1.4	11.542	0.921	80	397	100	12936	12365	3.43	11838	1098	11361	1004	912405
42	2	17	Hs~Ref:NM_005720.1~uORF:IOH3992~RFU:8479.36	HA20421~B42R17C02	7080	61020	140	11875	11153	3577	32	66	66	136	186	136	100	100	0	4729	4034	1463	36	211	211	259	97	37	100	100	0	2.614	2.9	2.827	3.206	1.804	3.011	0.866	149	464	89	16327	14910	1.386	11809	4518	11087	3823	1661728
40	19	6	Hs~MGC:BC006105.1~uORF:IOH5992~RFU:0	HA20421~B40R06C19	19480	54270	190	11864	12209	4230	34	116	116	436	1134	260	100	100	0	5006	4870	1074	22	385	385	854	1044	122	96	94	0	2.542	2.696	2.476	2.729	2.036	3.132	0.68	252	784	24	16369	16578	1.346	11748	4621	12093	4485	3076672
1	22	22	AlexaAntiMouseAb~N/A	HA20421~B01R22C22	6470	17030	100	11863	11327	2367	20	52	52	62	39	62	100	100	0	3086	2845	733	25	159	159	161	12	7	100	100	0	4.035	4.198	4.069	4.388	1.47	4.219	0.946	92	501	86	14738	13961	2.013	11811	2927	11275	2686	1042047
28	2	11	AlexaAntiMouseAb~N/A	HA20421~B28R11C02	16030	41790	110	11860	9902	4550	45	44	44	57	47	82	100	100	0	4230	3387	1464	43	204	204	269	119	44	98	95	0	2.935	3.097	3.111	3.196	2.196	3.24	0.921	107	407	86	15842	13041	1.553	11816	4026	9858	3183	1059540
45	13	2	Hs~Ref:NM_018039.2~uORF:IOH43857~RFU:8901.04	HA20421~B45R02C13	4760	62510	110	11856	11334	3549	31	48	48	56	31	55	100	100	0	1653	1573	612	38	184	184	184	12	6	100	100	0	8.038	8.125	7.638	8.998	1.899	8.292	0.843	115	481	88	13277	12675	3.007	11808	1469	11286	1389	1303442
41	9	9	Hs~Ref:NM_138779.1~uORF:IOH10711~RFU:21738.57	HA20421~B41R09C09	3970	59420	140	11849	11080	5020	45	44	44	52	28	53	100	100	0	5327	4556	1675	36	221	221	231	35	15	98	98	0	2.312	2.546	2.716	2.614	2.181	2.749	0.897	140	529	95	16911	15371	1.209	11805	5106	11036	4335	1551137
6	22	2	Hs~Ref:NM_000992.2~uORF:IOH1702~RFU:9970.58	HA20421~B06R02C22	10960	17470	130	11847	10277	3830	37	44	44	48	18	37	100	100	0	2163	1933	639	33	170	170	171	10	5	100	100	0	5.922	5.804	5.755	5.891	1.549	6.004	0.935	138	610	95	13796	11996	2.566	11803	1993	10233	1763	1418170
47	8	6	Hs~Ref:NM_017819.1~uORF:IOH45746~RFU:26820.4	HA20421~B47R06C08	12810	63280	120	11844	11264	4689	41	153	153	241	269	111	100	100	0	4854	4515	1264	27	321	321	305	70	22	100	99	0	2.579	2.649	2.701	2.589	2.021	2.95	0.84	124	497	90	16224	15305	1.367	11691	4533	11111	4194	1396707
14	4	9	Hs~Ref:NM_004069.3~uORF:IOH58971~RFU:10895.08	HA20421~B14R09C04	7390	27870	110	11842	13313	8565	64	72	72	13773	25469	184	15	0	0	4522	4473	780	17	178	178	395	1567	396	100	91	0	2.709	3.083	2.705	2.394	2.213	1578.28	0	80	463	100	16114	17536	1.438	11770	4344	13241	4295	1065078
23	8	12	Hs~MGC:BC032347.1~uORF:IOH21704~RFU:13050.13	HA20421~B23R12C08	12720	37510	140	11839	10236	5231	51	50	50	88	98	111	100	100	0	3444	2676	1315	49	192	192	204	44	21	99	96	0	3.625	4.101	4.243	4.955	2.425	4.403	0.831	162	532	91	15041	12670	1.858	11789	3252	10186	2484	1658250
31	17	18	Hs~Ref:NM_182481.1~uORF:IOH58617~RFU:7103.85	HA20421~B31R18C17	14550	47740	120	11834	12327	9325	75	43	43	68	75	110	100	100	0	1496	1483	611	41	219	219	230	36	15	100	99	0	9.233	9.718	9.623	7.413	2.117	12.233	0.871	115	486	92	13068	13548	3.207	11791	1277	12284	1264	1417586
41	2	11	AlexaAntiMouseAb~N/A	HA20421~B41R11C02	2560	59810	110	11832	9652	4277	44	45	45	59	46	77	100	100	0	4076	3119	1599	51	217	217	219	21	9	99	93	0	3.054	3.31	3.123	4.588	3.596	3.395	0.823	108	445	91	15646	12509	1.611	11787	3859	9607	2902	1042378
43	2	11	AlexaAntiMouseAb~N/A	HA20421~B43R11C02	11620	59810	110	11818	10474	3614	34	42	42	45	14	31	100	100	0	4181	3568	1350	37	214	214	213	17	7	100	100	0	2.968	3.11	2.956	3.351	2.353	3.218	0.864	97	472	96	15743	13786	1.57	11776	3967	10432	3354	1015955
13	20	22	ERa~N/A	HA20421~B13R22C20	6120	30540	100	11809	10960	3105	28	43	43	51	25	49	100	100	0	210	207	16	7	169	169	170	11	6	91	82	0	286.976	287.289	284.19	322.03	1.725	310.257	0.649	105	454	87	11807	10955	8.165	11766	41	10917	38	1150784
27	1	11	AlexaAntiMouseAb~N/A	HA20421~B27R11C01	11300	41790	110	11798	9752	4228	43	37	37	41	21	51	100	100	0	4307	3652	1299	35	193	193	194	14	7	100	100	0	2.859	2.809	2.935	2.794	1.946	2.996	0.91	92	491	82	15875	13174	1.515	11761	4114	9715	3459	897148
37	9	9	Hs~MGC:BC001327.1~uORF:IOH3125~RFU:27083.54	HA20421~B37R09C09	3930	54950	170	11797	11493	2919	25	39	39	57	105	184	100	100	0	6615	6368	1279	20	225	225	244	148	60	100	100	0	1.84	1.865	1.878	1.874	1.42	1.957	0.88	266	520	77	18148	17597	0.88	11758	6390	11454	6143	3057267
22	17	8	Hs~Ref:NM_144664.3~uORF:IOH45592~RFU:8368.18	HA20421~B22R08C17	10000	36680	140	11779	10270	4421	43	50	50	63	45	71	100	100	0	3354	2803	1168	41	195	195	206	33	16	100	100	0	3.713	3.919	4.061	4.368	2.203	4.148	0.875	160	551	87	14888	12828	1.893	11729	3159	10220	2608	1643274
15	19	18	Hs~Ref:NM_015978.1~N/A~RFU:12335.32	HA20421~B15R18C19	14880	29700	120	11769	12979	8372	64	38	38	41	10	24	100	100	0	3025	2690	1300	48	172	172	173	11	6	100	100	0	4.112	5.139	5.679	5.281	3.094	6.304	0.759	125	506	88	14584	15459	2.04	11731	2853	12941	2518	1622391
47	22	15	Hs~Ref:NM_001699.3~CAT:PV3971~RFU:1211.67	HA20421~B47R15C22	15610	65080	110	11764	11684	3270	27	68	68	210	455	216	100	100	0	206	203	13	6	216	216	478	534	111	0	0	0	-1169.6	-893.538	10440.5	6394.46	2.58	-87.443	0.018	108	330	89	11686	11603	Error	11696	-10	11616	-13	1261922
9	15	16	Hs~MGC:BC059947.1~uORF:IOH39895~RFU:27075.25	HA20421~B09R16C15	5100	24790	130	11756	11205	3752	33	57	57	73	61	83	100	100	0	4225	3668	1349	36	173	173	176	28	15	100	100	0	2.887	3.19	3.132	3.565	2.022	3.317	0.854	149	508	91	15751	14643	1.53	11699	4052	11148	3495	1669600
12	2	15	Hs~Ref:NM_020204.2~uORF:IOH41164~RFU:27046.25	HA20421~B12R15C02	16010	24600	130	11754	11392	4658	40	45	45	49	18	36	100	100	0	6690	5594	2130	38	169	169	171	16	9	100	100	0	1.796	2.092	2.128	2.154	2.122	2.184	0.885	137	471	93	18230	16772	0.844	11709	6521	11347	5425	1560723
32	1	11	AlexaAntiMouseAb~N/A	HA20421~B32R11C01	15870	46310	120	11739	9108	4515	49	38	38	43	14	32	100	100	0	4124	3405	1382	40	196	196	198	17	8	100	100	0	2.979	2.826	2.985	2.75	2.554	3.081	0.877	103	588	94	15629	12279	1.575	11701	3928	9070	3209	938094
35	20	6	Hs~Ref:NM_022101.1~uORF:IOH27781~RFU:27064.89	HA20421~B35R06C20	15150	49800	130	11730	10983	3920	35	39	39	46	25	54	100	100	0	3541	2830	1183	41	227	227	225	14	6	100	99	0	3.528	4.204	4.041	5.02	2.476	4.265	0.87	139	517	86	15005	13547	1.819	11691	3314	10944	2603	1526634
37	7	5	Hs~MGC:BC010901.1~uORF:IOH13498~RFU:27078.57	HA20421~B37R05C07	3540	54120	140	11728	10793	4859	45	45	45	82	88	107	100	100	0	6246	5108	2138	41	228	228	274	109	39	100	100	0	1.941	2.202	2.171	2.341	1.666	2.308	0.913	170	481	88	17701	15628	0.957	11683	6018	10748	4880	1834891
34	1	4	Hs~Ref:NM_145273.1~uORF:IOH10923~RFU:15394.3	HA20421~B34R04C01	6830	49410	120	11725	10700	6096	56	36	36	40	19	47	100	100	0	3691	3247	1509	46	229	229	229	14	6	100	100	0	3.376	3.533	3.54	3.411	1.825	3.798	0.925	120	565	93	15151	13682	1.755	11689	3462	10664	3018	1283994
37	18	6	Hs~MGC:BC031650.1~uORF:IOH22742~RFU:16791.46	HA20421~B37R06C18	5740	54320	140	11722	12014	4330	36	45	45	88	101	114	100	100	0	2975	2577	852	33	231	231	257	55	21	100	100	0	4.255	5.102	4.884	5.554	1.92	5.584	0.83	152	557	83	14421	14315	2.089	11677	2744	11969	2346	1826193
43	3	9	Hs~Ref:NM_006153.3~uORF:IOH6521~RFU:27061.58	HA20421~B43R09C03	11820	59420	110	11718	11503	3286	28	200	200	270	275	101	100	100	0	5251	5109	535	10	645	645	855	615	71	100	100	0	2.501	2.532	2.517	2.44	1.341	3.077	0.753	108	281	80	16124	15767	1.322	11518	4606	11303	4464	1242371
26	12	4	Hs~MGC:BC017114.1~uORF:IOH9995~RFU:26965.85	HA20421~B26R04C12	9030	40440	160	11714	11371	5415	47	46	46	187	532	284	100	100	0	1871	1515	878	57	218	218	338	596	176	63	55	0	7.059	8.732	9.889	10.342	1.798	9.14	0.712	233	616	86	13321	12622	2.819	11668	1653	11325	1297	2649543
38	2	22	ERa~N/A	HA20421~B38R22C02	7050	57520	130	11705	10204	4281	41	41	41	58	50	86	100	100	0	248	262	62	23	204	204	203	13	6	82	75	0	265.091	175.224	202.225	186.107	2.503	201.892	0.314	143	593	91	11708	10221	8.05	11664	44	10163	58	1459143
21	22	8	Hs~Ref:NM_198195.1~uORF:IOH44596~RFU:12614.75	HA20421~B21R08C22	6510	36700	140	11703	14145	10448	73	100	100	1180	6436	545	80	45	0	5612	4710	1960	41	203	203	603	694	115	85	84	0	2.145	3.116	2.324	4.425	8.382	883.517	0	162	698	58	17012	18552	1.101	11603	5409	14045	4507	2291563
9	21	6	Hs~MGC:BC040946.1~uORF:IOH26289~RFU:27031.33	HA20421~B09R06C21	6300	22780	120	11690	10885	3724	34	51	51	67	46	68	100	100	0	5504	4850	1401	28	170	170	173	15	8	100	100	0	2.182	2.315	2.335	2.386	1.83	2.479	0.858	137	463	93	16973	15514	1.126	11639	5334	10834	4680	1491311
45	17	3	Hs~Ref:NM_012396.1~uORF:IOH12626~RFU:23667.54	HA20421~B45R03C17	5570	62710	140	11685	10766	4387	40	52	52	79	71	89	100	100	0	5647	4535	2419	53	184	184	185	14	7	100	100	0	2.129	2.462	2.229	3.375	3.267	2.408	0.833	161	549	88	17096	15065	1.09	11633	5463	10714	4351	1733339
41	15	17	Hs~MGC:BC034692.1~uORF:IOH22176~RFU:20932.75	HA20421~B41R17C15	5170	61020	140	11685	10408	4592	44	54	54	83	105	126	100	100	0	4529	3689	1639	44	196	196	229	92	40	98	96	0	2.684	2.964	2.966	3.417	2.268	3.112	0.88	164	568	89	15964	13847	1.425	11631	4333	10354	3493	1706946
12	2	11	AlexaAntiMouseAb~N/A	HA20421~B12R11C02	16010	23790	120	11677	10001	4606	46	40	40	45	17	37	100	100	0	3855	3131	1290	41	164	164	165	11	6	100	100	0	3.153	3.357	3.529	3.349	2.702	3.653	0.846	102	552	82	15328	12928	1.657	11637	3691	9961	2967	1020138
26	14	5	Hs~MGC:BC003049.1~uORF:IOH4999~RFU:25121.27	HA20421~B26R05C14	9430	40630	170	11661	10994	5553	50	39	39	103	388	376	100	100	0	1299	1154	656	56	200	200	229	149	65	95	72	0	10.575	11.483	12.692	13.65	1.691	11.239	0.813	282	455	86	12721	11909	3.403	11622	1099	10955	954	3100224
2	19	3	Hs~Ref:NM_014280.1~uORF:IOH42939~RFU:27083.54	HA20421~B02R03C19	10400	13210	140	11658	11186	3344	29	61	61	84	71	84	100	100	0	4538	4097	1379	33	175	175	187	54	28	100	97	0	2.658	2.837	2.86	3.218	2.085	2.908	0.874	158	447	86	15960	15047	1.41	11597	4363	11125	3922	1767331
27	21	8	Hs~Ref:NM_007080.1~uORF:IOH10074~RFU:27071.11	HA20421~B27R08C21	15300	41190	110	11657	11686	2001	17	53	53	130	288	221	100	100	0	4939	4905	347	7	202	202	228	80	35	100	100	0	2.45	2.474	2.435	2.443	1.19	2.582	0.874	80	305	100	16341	16336	1.293	11604	4737	11633	4703	934884
20	22	1	AlexaAntiMouseAb~N/A	HA20421~B20R01C22	20060	30780	110	11656	9529	4537	47	42	42	46	15	32	100	100	0	3796	3145	1369	43	166	166	167	16	9	100	100	0	3.199	3.185	3.311	3.362	2.464	3.309	0.934	92	475	90	15244	12466	1.678	11614	3630	9487	2979	876705
13	16	19	Hs~Ref:XM_374177.2~uORF:IOH43615~RFU:26453.26	HA20421~B13R19C16	5320	29940	130	11656	10850	3539	32	46	46	68	74	108	100	100	0	4359	3949	1401	35	181	181	187	24	12	100	100	0	2.779	2.867	2.883	3.054	2.023	3.003	0.845	140	422	92	15788	14572	1.474	11610	4178	10804	3768	1519031
37	17	6	Hs~MGC:BC031650.1~uORF:IOH22742~RFU:19980.81	HA20421~B37R06C17	5540	54330	150	11651	10158	5596	55	42	42	91	142	156	100	99	0	2948	2469	1214	49	227	227	238	37	15	100	100	0	4.266	4.512	4.89	4.968	2.148	4.935	0.835	182	546	94	14330	12358	2.093	11609	2721	10116	2242	1848769
3	7	4	Hs~MGC:BC011924.1~uORF:IOH12682~RFU:18655.31	HA20421~B03R04C07	12490	13410	140	11630	10429	3931	37	45	45	65	67	103	100	100	0	3234	2873	1078	37	164	164	172	30	17	99	98	0	3.774	3.833	3.744	4.295	2.032	3.939	0.919	153	429	89	14655	13093	1.916	11585	3070	10384	2709	1595682
14	16	3	Hs~Ref:NM_173080.1~uORF:IOH34934~RFU:27090.59	HA20421~B14R03C16	9790	26670	130	11629	10575	4243	40	42	42	59	54	91	100	99	0	7029	6230	2161	34	175	175	180	17	9	100	100	0	1.691	1.74	1.818	1.754	2.521	1.873	0.813	149	558	91	18441	16588	0.757	11587	6854	10533	6055	1575745
14	13	2	Hs~Ref:NM_022756.2~uORF:IOH13235~RFU:19003.79	HA20421~B14R02C13	9190	26460	140	11628	10866	3227	29	50	50	127	189	148	100	100	0	3999	3575	1131	31	186	186	212	70	33	98	98	0	3.036	3.192	3.194	3.564	2.161	3.312	0.868	151	544	87	15391	14205	1.602	11578	3813	10816	3389	1640806
16	22	1	AlexaAntiMouseAb~N/A	HA20421~B16R01C22	20020	26270	110	11624	9343	4752	50	43	43	49	21	42	100	100	0	3595	3040	1278	42	158	158	160	13	8	100	100	0	3.37	3.227	3.438	3.304	3.021	3.595	0.837	88	556	90	15018	12182	1.753	11581	3437	9300	2882	822185
42	19	22	ERa~N/A	HA20421~B42R22C19	10500	62020	140	11618	10782	5936	55	42	42	60	57	95	100	100	0	221	224	26	11	187	187	187	11	5	82	70	0	340.471	290.27	263.628	284.826	2.711	346.513	0.52	143	824	91	11610	10777	8.411	11576	34	10740	37	1541856
22	10	15	Hs~Ref:NM_004064.2~uORF:IOH1795~RFU:25981.21	HA20421~B22R15C10	8600	38090	140	11590	10727	4325	40	44	44	62	52	83	100	100	0	3856	3216	1266	39	201	201	207	22	10	100	100	0	3.159	3.543	3.519	3.989	2.137	3.657	0.91	151	573	94	15201	13698	1.659	11546	3655	10683	3015	1619737
1	21	22	AlexaAntiMouseAb~N/A	HA20421~B01R22C21	6260	17030	110	11577	10007	3443	34	45	45	53	34	64	100	100	0	3049	2716	842	31	161	161	161	11	6	100	100	0	3.993	3.899	3.94	4.019	1.609	4.018	0.946	101	494	94	14420	12517	1.998	11532	2888	9962	2555	1010733
7	4	1	ERa~N/A	HA20421~B07R01C04	11900	17300	120	11563	11138	3340	29	43	43	51	27	52	100	100	0	230	252	125	49	168	168	167	10	5	94	89	0	185.806	132.083	185.846	185.882	1.994	123.805	0.313	120	611	88	11582	11179	7.538	11520	62	11095	84	1336549
42	3	1	ERa~N/A	HA20421~B42R01C03	7300	57820	130	11561	10318	3977	38	43	43	56	53	94	100	100	0	243	242	22	9	202	202	205	16	7	84	64	0	280.927	256.875	236.906	268.737	1.942	274.239	0.616	137	628	88	11559	10315	8.134	11518	41	10275	40	1413517
48	2	11	AlexaAntiMouseAb~N/A	HA20421~B48R11C02	16110	64260	110	11556	9666	4051	41	48	48	52	19	36	100	100	0	3765	3246	1091	33	176	176	176	12	6	100	98	0	3.206	3.133	3.183	3.292	2.588	3.456	0.851	103	399	86	15097	12688	1.681	11508	3589	9618	3070	995571
30	1	16	Hs~Ref:NM_001894.2~CAT:PV3500~RFU:1165.94	HA20421~B30R16C01	6830	47310	120	11551	10796	4373	40	39	39	47	32	68	100	100	0	251	253	20	7	226	226	241	201	83	0	0	0	460.48	398.407	395.337	478.997	2.586	399.997	0.426	129	495	85	11537	10784	8.847	11512	25	10757	27	1392702
36	3	1	ERa~N/A	HA20421~B36R01C03	16270	48810	130	11539	11049	3714	33	45	45	61	62	101	100	100	0	255	252	19	7	215	215	217	24	11	73	22	0	287.35	297.405	288.618	319.695	2.255	365.23	0.281	129	670	93	11534	11041	8.167	11494	40	11004	37	1425356
15	20	18	Hs~Ref:NM_015978.1~N/A~RFU:12142.96	HA20421~B15R18C20	15080	29700	130	11537	11756	6608	56	41	41	42	10	23	100	100	0	2978	2637	1213	45	171	171	172	10	5	100	100	0	4.095	4.751	5.401	5.021	2.405	5.373	0.828	128	531	93	14303	14181	2.034	11496	2807	11715	2466	1504741
35	19	6	Hs~Ref:NM_022101.1~uORF:IOH27781~RFU:27071.52	HA20421~B35R06C19	14960	49800	130	11536	11014	4375	39	38	38	44	24	54	100	100	0	3365	2920	1151	39	227	227	225	15	6	100	98	0	3.664	4.076	3.978	4.695	2.619	4.377	0.82	138	506	90	14636	13669	1.873	11498	3138	10976	2693	1519908
45	16	17	Hs~Ref:NM_013242.1~uORF:IOH5166~RFU:22152.8	HA20421~B45R17C16	5370	65520	130	11519	10873	4089	37	56	56	97	104	107	100	100	0	4333	4081	1869	45	185	185	456	587	128	97	87	0	2.764	2.776	2.803	2.933	1.742	2.97	0.789	146	472	95	15611	14713	1.466	11463	4148	10817	3896	1587524
43	6	13	Hs~Ref:NM_006628.4~uORF:IOH3044~RFU:27066.97	HA20421~B43R13C06	12430	60210	140	11518	10666	3702	34	48	48	61	39	63	100	100	0	5827	5162	1897	36	221	221	246	59	23	98	98	0	2.046	2.149	2.121	2.397	2.593	2.253	0.833	152	527	90	17076	15559	1.033	11470	5606	10618	4941	1621258
34	2	16	Hs~Ref:NM_005546.3~CAT:PV3875~RFU:19385.55	HA20421~B34R16C02	7030	51810	130	11515	10837	4674	43	41	41	44	19	43	100	100	0	4339	3636	1791	49	229	229	232	20	8	99	96	0	2.792	3.169	3.074	4.213	3.372	3.434	0.735	134	492	93	15584	14203	1.481	11474	4110	10796	3407	1452168
29	17	12	Hs~Ref:NM_017592.1~uORF:IOH44564~RFU:27061.99	HA20421~B29R12C17	5560	46490	110	11510	11594	2061	17	315	315	2449	3295	134	100	96	0	6034	6058	398	6	355	355	1960	4612	235	100	0	0	1.971	1.978	2.021	1.948	1.239	2.358	0.658	80	498	100	16874	16982	0.979	11195	5679	11279	5703	927502
13	22	22	AlexaAntiMouseAb~N/A	HA20421~B13R22C22	6520	30530	100	11505	9883	3627	36	38	38	44	23	52	100	100	0	3261	2759	1149	41	174	174	174	13	7	100	100	0	3.715	3.809	3.684	4.64	2.142	3.81	0.922	91	483	89	14554	12430	1.893	11467	3087	9845	2585	899311
26	19	4	Hs~MGC:BC020555.1~uORF:IOH10305~RFU:27045.42	HA20421~B26R04C19	10430	40440	180	11505	11679	5601	47	48	48	972	2230	229	100	92	0	1063	1021	602	58	201	201	492	2672	543	0	0	0	13.291	14.184	16.003	19.051	1.999	13.358	0.804	289	846	93	12319	12451	3.732	11457	862	11631	820	3375101
48	2	16	Hs~Ref:NM_005409.3~CAT_PHC1695~RFU:2921.02	HA20421~B48R16C02	16100	65260	120	11504	11921	3002	25	127	127	360	563	156	100	100	0	251	1216	2622	215	238	238	490	478	97	21	15	0	875.154	12.059	36.11	51.326	11	15.059	0.051	108	506	81	11390	12772	9.773	11377	13	11794	978	1287415
37	4	8	Hs~Ref:NM_001982.1~N/A~RFU:3534.71	HA20421~B37R08C04	2950	54730	130	11501	11603	5635	48	46	46	57	34	59	100	100	0	1297	1235	522	42	219	219	230	34	14	92	91	0	10.626	11.375	11.34	13.568	2.284	12.185	0.858	139	495	92	12533	12573	3.41	11455	1078	11557	1016	1612776
11	18	15	Hs~Ref:NM_032028.2~CAT:PV3505~RFU:650.37	HA20421~B11R15C18	14710	24610	120	11490	12347	4572	37	45	45	47	14	29	100	100	0	195	243	219	90	166	166	168	11	6	84	67	0	394.655	159.766	394.28	362.557	3.091	260.224	0.036	126	506	92	11474	12379	8.624	11445	29	12302	77	1555667
45	8	16	Hs~MGC:BC048970.1~uORF:IOH26893~RFU:4782.03	HA20421~B45R16C08	3760	65320	120	11489	11397	3974	34	50	50	65	55	84	100	100	0	1335	1267	513	40	176	176	196	102	52	98	93	0	9.87	10.401	9.998	11.6	1.805	10.511	0.871	121	489	88	12598	12438	3.303	11439	1159	11347	1091	1379033
17	22	15	Hs~Ref:NM_004302.3~CAT:PV4312~RFU:18363.75	HA20421~B17R15C22	6480	33620	130	11487	11164	5287	47	41	41	46	18	39	100	100	0	5429	4691	1547	32	179	179	179	15	8	100	100	0	2.18	2.465	2.504	2.387	1.822	2.727	0.889	119	650	88	16696	15635	1.124	11446	5250	11123	4512	1328478
45	15	17	Hs~Ref:NM_013242.1~uORF:IOH5166~RFU:22439.61	HA20421~B45R17C15	5170	65530	140	11449	10617	4585	43	54	54	94	105	111	100	100	0	4279	3681	1398	37	180	180	231	127	54	100	100	0	2.78	3.017	3.034	3.01	1.762	3.296	0.878	151	531	94	15494	14064	1.475	11395	4099	10563	3501	1603200
2	20	3	Hs~Ref:NM_014280.1~uORF:IOH42939~RFU:27080.64	HA20421~B02R03C20	10600	13200	130	11449	11338	3376	29	55	55	75	62	82	100	100	0	4803	4214	1362	32	172	172	199	76	38	99	99	0	2.46	2.791	2.733	3.046	1.883	2.896	0.87	156	447	91	16025	15325	1.299	11394	4631	11283	4042	1768747
18	18	4	Hs~MGC:BC030290.1~uORF:IOH21571~RFU:5580.97	HA20421~B18R04C18	10200	31400	130	11448	10357	4870	47	46	46	80	110	137	100	100	0	1162	1112	575	51	185	185	265	191	72	82	77	0	11.67	11.123	11.051	14.369	2.233	10.97	0.875	144	501	90	12379	11238	3.545	11402	977	10311	927	1491443
34	1	16	Hs~Ref:NM_005546.3~CAT:PV3875~RFU:19409.16	HA20421~B34R16C01	6830	51810	130	11447	10381	3978	38	42	42	46	22	47	100	100	0	4370	3634	1876	51	229	229	230	18	7	100	98	0	2.754	3.036	2.808	4.252	3.1	3.067	0.789	138	589	91	15546	13744	1.462	11405	4141	10339	3405	1432599
13	19	22	ERa~N/A	HA20421~B13R22C19	5920	30540	120	11428	9146	4836	52	45	45	56	37	66	100	100	0	205	208	19	9	175	175	174	10	5	87	75	0	379.433	275.788	253.157	284.789	1.971	311.965	0.638	110	667	90	11413	9134	8.568	11383	30	9101	33	1006079
29	18	19	Hs~Ref:NM_018132.3~uORF:IOH45979~RFU:15686.53	HA20421~B29R19C18	5770	47890	130	11402	10847	3498	32	55	55	364	1083	297	100	100	0	1861	1715	509	29	222	222	227	27	11	100	99	0	6.923	7.228	7.061	7.676	1.716	7.713	0.845	137	426	93	12986	12285	2.791	11347	1639	10792	1493	1486050
19	2	18	Hs~MGC:BC016330.1~uORF:IOH14709~RFU:24344.96	HA20421~B19R18C02	11490	34220	130	11395	11451	4322	37	42	42	59	48	81	100	100	0	2538	2124	856	40	185	185	188	18	9	100	98	0	4.825	5.884	5.946	7.115	2.247	6.053	0.881	142	525	93	13706	13348	2.271	11353	2353	11409	1939	1626009
16	6	5	Hs~Ref:NM_199188.1~uORF:IOH38224~RFU:8086.78	HA20421~B16R05C06	16810	27100	190	11391	13501	9538	70	56	56	180	422	234	100	100	0	870	1428	1235	86	178	178	229	263	114	53	50	0	16.38	10.756	19.605	23.671	3.181	9.703	0.851	257	821	82	12027	14695	4.034	11335	692	13445	1250	3469834
21	6	12	Hs~MGC:BC002921.2~uORF:IOH6311~RFU:27054.95	HA20421~B21R12C06	3290	37540	200	11389	11268	7503	66	45	45	79	130	164	100	100	0	3096	2548	1468	57	197	197	215	67	31	100	100	0	3.913	4.774	4.767	4.545	1.463	5.3	0.864	264	1016	79	14243	13574	1.968	11344	2899	11223	2351	2974776
40	1	16	Hs~IVGN:NM_001206389~CAT_PHG0184~N/A	HA20421~B40R16C01	15860	56300	130	11380	12434	6160	49	47	47	2123	10593	498	54	10	0	248	257	39	15	227	227	275	336	122	0	0	0	539.667	412.9	386.333	441.794	2.598	423.473	0.293	120	699	88	11354	12417	9.076	11333	21	12387	30	1492074
31	2	3	Hs~Ref:NM_199139.1~uORF:IOH44783~RFU:25410.66	HA20421~B31R03C02	11540	44730	130	11372	10325	4506	43	38	38	44	25	56	100	100	0	3626	3276	1540	47	209	209	208	13	6	100	100	0	3.317	3.354	3.416	3.818	1.939	3.402	0.895	136	595	94	14751	13354	1.73	11334	3417	10287	3067	1404240
39	21	16	Hs~MGC:BC053646.1~uORF:IOH28946~RFU:27049.15	HA20421~B39R16C21	15360	56310	140	11341	11460	5030	43	55	55	91	108	118	100	100	0	6695	5266	2831	53	231	231	236	31	13	100	100	0	1.746	2.265	2.169	3.162	3.354	7.388	0.177	158	429	46	17750	16440	0.804	11286	6464	11405	5035	1810678
13	3	1	ERa~N/A	HA20421~B13R01C03	2720	26320	130	11339	10059	3816	37	44	44	72	109	151	100	100	0	198	205	22	10	169	169	169	12	7	87	61	0	389.483	278.194	290.158	306.041	1.872	282.792	0.657	139	634	83	11324	10051	8.605	11295	29	10015	36	1398235
13	21	22	AlexaAntiMouseAb~N/A	HA20421~B13R22C21	6320	30540	110	11327	9935	3911	39	36	36	43	17	39	100	100	0	3302	2682	1222	45	172	172	173	13	7	100	100	0	3.607	3.944	3.774	4.881	2.591	4.002	0.881	92	537	84	14421	12409	1.851	11291	3130	9899	2510	914039
28	17	13	Hs~Ref:NM_006272.1~uORF:IOH4935~RFU:15262.95	HA20421~B28R13C17	19040	42200	140	11324	10904	3529	32	76	76	431	795	184	100	100	0	3490	3219	777	24	218	218	414	396	95	100	98	0	3.438	3.608	3.534	3.555	1.386	4.087	0.852	166	335	86	14520	13829	1.781	11248	3272	10828	3001	1810082
48	8	3	Hs~Ref:NM_207047.1~uORF:IOH44493~RFU:27049.15	HA20421~B48R03C08	17310	62650	150	11318	9956	5202	52	51	51	120	175	145	100	100	0	6574	5109	2596	50	203	203	276	159	57	100	98	0	1.768	2.019	2.033	2.274	1.897	2.129	0.866	183	623	88	17638	14811	0.823	11267	6371	9905	4906	1821909
23	15	8	Hs~Ref:NM_201259.1~uORF:IOH45586~RFU:27018.48	HA20421~B23R08C15	14120	36700	140	11313	10693	4168	38	83	83	253	336	132	100	100	0	2853	2598	1033	39	212	212	252	108	42	97	95	0	4.252	4.447	4.697	5.004	2.09	4.747	0.793	153	411	89	13871	12996	2.088	11230	2641	10610	2386	1636021
21	1	5	Hs~MGC:BC010907.1~uORF:IOH12088~RFU:11957.15	HA20421~B21R05C01	2300	36110	130	11308	10188	4037	39	42	42	49	25	51	100	100	0	2121	1918	841	43	184	184	184	12	6	100	99	0	5.816	5.851	5.536	6.949	2.079	5.874	0.901	128	612	88	13203	11880	2.54	11266	1937	10146	1734	1304090
12	8	16	Hs~Ref:NM_005416.1~uORF:IOH59847~RFU:27041.27	HA20421~B12R16C08	17220	24800	130	11307	12599	7900	62	97	97	695	1289	185	96	89	0	7707	7199	1735	24	180	180	191	50	26	100	100	0	1.489	1.781	1.576	1.448	2.155	2.438	0.64	135	442	91	18737	19521	0.575	11210	7527	12502	7019	1700914
7	3	1	ERa~N/A	HA20421~B07R01C03	11700	17300	120	11301	11026	3436	31	44	44	52	32	61	100	100	0	226	225	25	11	169	169	168	11	6	98	90	0	197.491	196.107	212.053	209.459	1.845	221.871	0.62	122	604	91	11314	11038	7.626	11257	57	10982	56	1345175
12	1	15	Hs~Ref:NM_020204.2~uORF:IOH41164~RFU:27071.52	HA20421~B12R15C01	15810	24600	120	11296	10580	3904	36	40	40	46	21	45	100	100	0	6953	6081	1801	29	170	170	172	17	9	100	100	0	1.659	1.783	1.772	1.798	2.008	1.896	0.877	127	567	92	18039	16451	0.731	11256	6783	10540	5911	1343606
24	2	11	AlexaAntiMouseAb~N/A	HA20421~B24R11C02	16050	37280	110	11293	9172	4529	49	40	40	45	33	73	100	100	0	4001	3352	1212	36	179	179	179	15	8	100	100	0	2.944	2.878	3.108	2.606	2.264	3.2	0.881	99	461	92	15075	12305	1.558	11253	3822	9132	3173	907997
48	1	11	AlexaAntiMouseAb~N/A	HA20421~B48R11C01	15910	64260	120	11285	9365	3935	42	52	52	58	34	58	100	100	0	3587	3050	1196	39	181	181	187	26	13	100	97	0	3.298	3.246	3.257	3.595	2.789	3.405	0.894	106	548	93	14639	12182	1.722	11233	3406	9313	2869	992655
5	22	22	AlexaAntiMouseAb~N/A	HA20421~B05R22C22	6510	21520	110	11281	9419	3764	39	42	42	49	28	57	100	100	0	2962	2428	946	38	167	167	166	10	6	100	100	0	4.021	4.147	4.081	4.227	1.692	4.235	0.937	93	534	86	14034	11638	2.008	11239	2795	9377	2261	875976
48	3	5	Hs~Ref:NM_021639.2~uORF:IOH10045~RFU:26965.03	HA20421~B48R05C03	16310	63060	120	11263	11614	2689	23	534	534	689	579	84	100	100	0	3081	2849	639	22	247	247	1094	1233	112	93	75	0	3.786	4.258	4.04	4.376	1.474	5.18	0.586	123	499	93	13563	13682	1.921	10729	2834	11080	2602	1428571
45	10	8	Hs~Ref:NM_002677.1~uORF:IOH27101~RFU:6277.86	HA20421~B45R08C10	4160	63730	130	11262	11033	3554	32	58	58	87	133	152	100	100	0	1253	1130	347	30	209	209	227	70	30	96	94	0	10.732	11.916	11.558	13.416	2.042	12.981	0.808	134	476	94	12248	11896	3.424	11204	1044	10975	921	1478423
21	9	7	Hs~Ref:NM_006504.2~uORF:IOH20996~RFU:6911.16	HA20421~B21R07C09	3900	36520	130	11247	13114	9100	69	39	39	41	11	26	100	100	0	1883	1853	872	47	191	191	191	11	5	100	99	0	6.624	7.867	7.736	7.57	1.845	9.051	0.917	126	480	92	12900	14737	2.728	11208	1692	13075	1662	1652305
13	1	4	Hs~Ref:NM_016564.1~uORF:IOH22629~RFU:27106.75	HA20421~B13R04C01	2290	26950	170	11246	11467	2604	22	53	53	978	2678	273	100	99	0	5805	5746	1502	26	176	176	514	1086	211	99	99	0	1.988	2.049	2.049	2.081	1.39	2.156	0.775	276	769	72	16822	16984	0.992	11193	5629	11414	5570	3164968
28	21	6	Hs~MGC:BC092474.1~uORF:IOH62679~RFU:24801.5	HA20421~B28R06C21	19830	40790	110	11225	11636	2715	23	130	130	1365	2199	161	100	100	0	7332	7264	677	9	209	209	682	883	129	100	100	0	1.558	1.631	1.669	1.593	1.246	1.692	0.7	80	269	100	18218	18561	0.639	11095	7123	11506	7055	930908
11	12	2	Hs~MGC:BC034401.1~uORF:IOH22782~RFU:22326.46	HA20421~B11R02C12	13530	22000	140	11222	10874	2963	27	43	43	49	21	42	100	100	0	6552	5981	1519	25	173	173	175	15	8	100	100	0	1.752	1.865	1.84	1.983	1.897	1.931	0.887	159	574	95	17558	16639	0.809	11179	6379	10831	5808	1728898
12	9	18	Hs~MGC:BC066284.1~uORF:IOH61831~RFU:4763.61	HA20421~B12R18C09	17410	25200	120	11213	10615	3981	37	80	80	355	593	167	100	100	0	1352	1349	317	23	181	181	190	31	16	100	99	0	9.507	9.02	9.242	8.776	1.413	9.747	0.903	102	419	86	12304	11703	3.249	11133	1171	10535	1168	1082696
47	21	1	AlexaAntiMouseAb~N/A	HA20421~B47R01C21	15430	62270	120	11212	9961	6956	69	47	47	60	41	68	100	99	0	4126	3407	2031	59	198	198	222	75	33	100	96	0	2.842	3.089	3.244	2.731	2.242	3.352	0.916	118	601	90	15093	13123	1.507	11165	3928	9914	3209	1175371
41	21	7	Hs~MGC:BC011739.2~uORF:IOH14463~RFU:9315.2	HA20421~B41R07C21	6370	59020	130	11204	10593	3685	34	45	45	51	25	49	100	100	0	1803	1654	512	30	208	208	221	41	18	98	97	0	6.996	7.295	7.534	7.839	1.948	8.187	0.808	133	437	94	12754	11994	2.807	11159	1595	10548	1446	1408846
31	1	3	Hs~Ref:NM_199139.1~uORF:IOH44783~RFU:25372.12	HA20421~B31R03C01	11330	44730	130	11199	10231	4696	45	36	36	42	25	59	100	100	0	3640	3375	1457	43	207	207	207	13	6	100	100	0	3.252	3.218	3.16	3.466	2.309	3.454	0.845	137	645	97	14596	13363	1.701	11163	3433	10195	3168	1401655
1	16	2	Hs~MGC:BC021174.1~uORF:IOH10706~RFU:23484.58	HA20421~B01R02C16	5280	13020	150	11192	11217	4011	35	50	50	62	45	72	100	100	0	2801	2561	723	28	159	159	160	12	7	100	100	0	4.217	4.649	4.421	4.881	1.67	5.083	0.86	189	493	94	13784	13569	2.076	11142	2642	11167	2402	2120011
45	9	8	Hs~Ref:NM_002677.1~uORF:IOH27101~RFU:7710.93	HA20421~B45R08C09	3960	63730	140	11165	11353	4138	36	55	55	76	110	144	100	100	0	1416	1250	404	32	207	207	223	47	21	100	94	0	9.189	10.832	11.129	12.071	1.994	11.662	0.864	143	583	95	12319	12341	3.2	11110	1209	11298	1043	1623480
10	14	20	Hs~MGC:NM_178553.2~uORF:IOH25885~RFU:27078.98	HA20421~B10R20C14	9410	25570	160	11161	10665	3674	34	52	52	92	99	107	100	100	0	3656	2996	1229	41	186	186	194	27	13	100	100	0	3.201	3.777	3.6	4.62	2.484	3.919	0.822	182	676	92	14579	13423	1.679	11109	3470	10613	2810	1941095
19	12	2	Hs~Ref:NM_006658.1~uORF:IOH21548~RFU:27067.79	HA20421~B19R02C12	13500	31000	140	11159	10578	3413	32	40	40	49	33	67	100	100	0	4567	3987	1357	34	183	183	185	13	7	100	100	0	2.536	2.77	2.698	3.026	1.881	2.824	0.913	156	636	87	15503	14342	1.343	11119	4384	10538	3804	1650099
9	1	9	Hs~MGC:BC001487.2~uORF:IOH12155~RFU:16566.8	HA20421~B09R09C01	2290	23390	140	11155	11059	7661	69	50	50	72	75	104	100	99	0	3580	2932	1488	50	173	173	192	58	30	97	97	0	3.259	3.99	4.208	3.667	2.59	4.987	0.769	173	628	85	14512	13768	1.705	11105	3407	11009	2759	1913181
2	5	20	Hs~Ref:NM_003792.1~uORF:IOH10852~RFU:14407.84	HA20421~B02R20C05	7590	16620	130	11150	10552	3623	34	45	45	65	64	98	100	100	0	1996	1758	667	37	170	170	524	701	133	85	70	0	6.082	6.616	6.38	7.691	2.648	7.89	0.568	148	448	90	12931	12095	2.604	11105	1826	10507	1588	1561643
42	2	22	ERa~N/A	HA20421~B42R22C02	7080	62020	130	11133	9787	4264	43	44	44	59	43	72	100	100	0	236	234	25	10	185	185	185	13	7	90	75	0	217.431	198.837	185.188	207.856	1.924	211.067	0.707	135	599	86	11140	9792	7.764	11089	51	9743	49	1321296
21	12	20	Hs~Ref:NM_006791.1~uORF:IOH3901~RFU:27074.42	HA20421~B21R20C12	4510	39120	140	11130	10250	3727	36	45	45	58	51	87	100	100	0	3503	2915	1180	40	206	206	208	19	9	100	100	0	3.362	3.767	3.739	4.211	1.769	3.778	0.912	159	460	94	14382	12914	1.749	11085	3297	10205	2709	1629717
16	19	14	Hs~MGC:BC002559.1~uORF:IOH4053~RFU:23080.14	HA20421~B16R14C19	19410	28880	140	11130	9822	4871	49	46	46	66	54	81	100	100	0	1252	1138	545	47	165	165	165	13	7	97	96	0	10.197	10.047	9.878	11.495	2.343	10.947	0.785	145	587	93	12171	10749	3.35	11084	1087	9776	973	1424174
8	6	8	Hs~Ref:NM_001896.1~N/A~RFU:10426.03	HA20421~B08R08C06	16780	18680	170	11119	10207	5426	53	52	52	119	176	147	100	100	0	2566	2488	1255	50	171	171	198	71	35	100	100	0	4.621	4.383	5.408	4.102	2.236	6.041	0.502	196	495	78	13462	12472	2.208	11067	2395	10155	2317	2000495
2	5	6	Hs~Ref:NM_198219.1~uORF:IOH59467~RFU:26074.51	HA20421~B02R06C05	7590	13810	110	11109	11690	2350	20	252	252	1662	2132	128	100	100	0	5760	5774	330	5	201	201	1116	1262	113	100	100	0	1.953	2.052	2.095	2.012	1.224	2.246	0.772	80	392	100	16416	17011	0.966	10857	5559	11438	5573	935224
26	13	5	Hs~MGC:BC003049.1~uORF:IOH4999~RFU:27070.28	HA20421~B26R05C13	9230	40650	180	11103	10674	4778	44	41	41	105	360	342	100	100	0	1163	1196	605	50	211	211	229	108	47	99	95	0	11.62	10.795	11.667	12.305	1.587	10.57	0.829	282	624	90	12014	11618	3.539	11062	952	10633	985	3010161
7	15	3	Hs~Ref:NM_020467.2~uORF:IOH3994~RFU:11836.97	HA20421~B07R03C15	14100	17710	150	11089	10694	3866	36	46	46	181	330	182	100	100	0	2716	2316	972	41	169	169	172	16	9	100	100	0	4.336	4.959	4.962	6.04	2.285	5.051	0.828	171	483	95	13590	12795	2.116	11043	2547	10648	2147	1828663
33	18	3	Hs~MGC:BC040106.1~uORF:IOH26285~RFU:15770.65	HA20421~B33R03C18	5710	49190	130	11082	10026	4069	40	39	39	42	12	28	100	100	0	2509	2195	803	36	226	226	228	15	6	100	99	0	4.837	5.072	5.06	5.41	2.3	5.521	0.827	127	552	90	13326	11956	2.274	11043	2283	9987	1969	1273312
23	21	22	AlexaAntiMouseAb~N/A	HA20421~B23R22C21	15320	39510	100	11060	9002	4468	49	39	39	44	16	36	100	100	0	2586	2274	1214	53	183	183	185	16	8	100	100	0	4.586	4.286	4.107	5.49	2.287	4.305	0.907	80	493	81	13424	11054	2.197	11021	2403	8963	2091	720150
39	3	14	Hs~Ref:NM_152387.2~uORF:IOH53987~RFU:27077.74	HA20421~B39R14C03	11760	55920	170	11049	10005	6584	65	45	45	92	180	195	100	100	0	2825	2306	1564	67	219	219	227	41	18	99	97	0	4.223	4.772	5.023	6.125	2.368	4.86	0.857	205	634	90	13610	12047	2.078	11004	2606	9960	2087	2051017
7	22	22	AlexaAntiMouseAb~N/A	HA20421~B07R22C22	15490	21510	110	11048	9458	3700	39	41	41	45	16	35	100	100	0	2965	2625	796	30	161	161	162	10	6	100	100	0	3.925	3.822	4.039	3.771	1.704	4.077	0.917	91	573	93	13811	11881	1.973	11007	2804	9417	2464	860679
42	4	1	ERa~N/A	HA20421~B42R01C04	7490	57810	120	11045	9809	4161	42	44	44	61	62	101	100	100	0	240	238	20	8	202	202	202	11	5	91	71	0	289.5	271.25	258.446	268.121	1.688	289.371	0.637	131	579	88	11039	9801	8.177	11001	38	9765	36	1284917
42	1	17	Hs~Ref:NM_005720.1~uORF:IOH3992~RFU:8235.95	HA20421~B42R17C01	6880	61020	130	11037	10764	3161	29	56	56	79	65	82	100	100	0	4789	4071	1470	36	197	197	241	93	38	100	100	0	2.391	2.764	2.638	3.033	1.976	2.917	0.823	144	527	90	15573	14582	1.258	10981	4592	10708	3874	1550017
9	22	16	Hs~MGC:BC067301.1~uORF:IOH40043~RFU:2776.81	HA20421~B09R16C22	6490	24780	120	11036	10534	4654	44	41	41	45	14	31	100	100	0	665	651	313	48	168	168	168	9	5	100	98	0	22.123	21.725	21.893	26.698	2.068	22.64	0.745	110	583	85	11492	10976	4.467	10995	497	10493	483	1158786
44	11	14	Hs~MGC:BC016828.1~uORF:IOH23007~RFU:5924.14	HA20421~B44R14C11	17920	60410	120	11035	10118	4342	42	99	99	261	416	159	100	100	0	1345	1366	511	37	206	206	254	148	58	98	94	0	9.601	8.637	7.658	8.851	1.931	9.963	0.739	118	486	90	12075	11179	3.263	10936	1139	10019	1160	1193967
13	5	7	Hs~Ref:NM_033256.1~uORF:IOH13214~RFU:26321.48	HA20421~B13R07C05	3120	27530	140	11030	10950	3845	35	106	106	246	357	145	100	100	0	2909	2604	742	28	261	261	297	150	50	97	95	0	4.125	4.628	4.526	4.925	1.898	5.094	0.838	158	533	91	13572	13187	2.045	10924	2648	10844	2343	1730108
36	21	1	AlexaAntiMouseAb~N/A	HA20421~B36R01C21	19870	48810	120	11016	9510	5787	60	70	70	201	371	184	99	93	0	3922	2783	1801	64	209	209	213	25	11	100	97	0	2.948	3.667	3.634	4.748	3.052	3.658	0.886	110	589	84	14659	12014	1.56	10946	3713	9440	2574	1046128
15	4	18	Hs~MGC:BC032852.2~uORF:IOH27153~RFU:25379.16	HA20421~B15R18C04	11890	29710	160	11011	10593	4930	46	56	56	445	763	171	100	100	0	3084	2504	1141	45	188	188	299	201	67	99	97	0	3.783	4.55	4.77	4.959	1.612	4.756	0.905	195	584	93	13851	12853	1.919	10955	2896	10537	2316	2065717
12	12	16	Hs~Ref:NM_182770.1~uORF:IOH53444~RFU:27063.24	HA20421~B12R16C12	18020	24800	130	11010	11515	5685	49	46	46	52	21	40	100	100	0	4035	3359	1191	35	165	165	165	11	6	100	100	0	2.833	3.591	3.606	3.596	1.829	4.064	0.86	131	486	93	14834	14663	1.502	10964	3870	11469	3194	1508436
20	21	1	AlexaAntiMouseAb~N/A	HA20421~B20R01C21	19860	30780	110	11009	9212	4321	46	44	44	47	17	36	100	100	0	3762	2942	1449	49	165	165	169	18	10	100	100	0	3.048	3.301	3.298	3.727	2.184	3.368	0.905	94	463	90	14562	11945	1.608	10965	3597	9168	2777	865950
26	5	16	Hs~Ref:NM_006274.2~CAT_PHC1244~RFU:1243.17	HA20421~B26R16C05	7620	42830	120	11006	11074	4126	37	38	38	43	14	32	100	100	0	244	243	17	6	213	213	214	14	6	79	57	0	353.806	367.867	349.964	376.934	1.855	408.512	0.44	124	493	91	10999	11066	8.467	10968	31	11036	30	1373229
2	19	22	ERa~N/A	HA20421~B02R22C19	10380	17020	120	11003	9985	3608	36	44	44	54	35	64	100	100	0	219	247	148	59	164	164	165	10	6	95	80	0	199.255	119.771	203.068	180.231	2.272	140.189	0.159	121	598	92	11014	10024	7.638	10959	55	9941	83	1208199
7	20	22	ERa~N/A	HA20421~B07R22C20	15100	21510	120	10996	10815	3448	31	42	42	50	24	48	100	100	0	200	197	18	9	164	164	164	10	6	86	73	0	304.278	326.455	344.269	383.232	2.083	322.471	0.639	120	610	91	10990	10806	8.249	10954	36	10773	33	1297834
16	2	11	AlexaAntiMouseAb~N/A	HA20421~B16R11C02	16010	28280	110	10995	9378	3583	38	41	41	45	15	33	100	100	0	3692	3094	1176	38	169	169	168	11	6	100	100	0	3.109	3.192	3.173	3.361	2.326	3.42	0.832	96	469	95	14477	12262	1.637	10954	3523	9337	2925	900295
27	1	18	Hs~MGC:BC022520.1~uORF:IOH10749~RFU:12943.81	HA20421~B27R18C01	11300	43210	140	10994	9277	4476	48	38	38	50	43	86	100	100	0	2805	8776	14464	164	202	202	202	13	6	100	100	0	4.209	1.078	3.611	2.467	3.257	0.368	0.267	141	739	95	13559	17813	2.073	10956	2603	9239	8574	1308108
13	11	18	Hs~Ref:NM_004175.3~uORF:IOH56705~RFU:3184.43	HA20421~B13R18C11	4320	29740	100	10992	11622	5817	50	41	41	45	17	37	100	100	0	779	742	247	33	172	172	173	11	6	100	100	0	18.041	20.318	20.994	20.075	1.628	22.934	0.859	94	424	94	11558	12151	4.173	10951	607	11581	570	1092422
6	21	2	Hs~Ref:NM_000992.2~uORF:IOH1702~RFU:10435.52	HA20421~B06R02C21	10750	17470	130	10991	10363	3798	36	41	41	46	17	36	100	100	0	2108	1890	664	35	166	166	166	9	5	100	100	0	5.639	5.987	5.964	6.412	1.942	6.347	0.867	146	505	93	12892	12046	2.495	10950	1942	10322	1724	1513018
37	10	9	Hs~MGC:BC001327.1~uORF:IOH3125~RFU:27034.23	HA20421~B37R09C10	4130	54950	180	10984	10953	3015	27	41	41	56	89	158	100	100	0	6432	5985	1399	23	226	226	250	159	63	100	99	0	1.763	1.895	1.807	1.908	1.498	1.987	0.849	271	596	80	17149	16671	0.818	10943	6206	10912	5759	2968203
20	14	3	Hs~Ref:NM_199124.1~uORF:IOH43439~RFU:27055.36	HA20421~B20R03C14	18430	31200	170	10967	10183	6414	62	43	43	53	51	96	100	100	0	2333	1733	1233	71	176	176	204	147	72	81	66	0	5.064	6.513	7.468	9.818	2.402	6.316	0.866	224	565	54	13081	11697	2.34	10924	2157	10140	1557	2280995
13	17	9	Hs~MGC:BC008902.2~uORF:IOH46064~RFU:21148.27	HA20421~B13R09C17	5520	27930	120	10960	10491	4309	41	42	42	47	25	53	100	100	0	3612	3021	1316	43	180	180	180	12	6	100	100	0	3.181	3.678	3.496	4.3	2.406	4.056	0.752	126	493	89	14350	13290	1.67	10918	3432	10449	2841	1321813
33	21	22	AlexaAntiMouseAb~N/A	HA20421~B33R22C21	6310	52990	100	10949	9416	3119	33	43	43	47	17	36	100	100	0	3337	2879	955	33	224	224	224	14	6	100	100	0	3.503	3.53	3.555	3.735	1.695	3.625	0.913	90	447	93	14019	12028	1.809	10906	3113	9373	2655	847414
44	2	11	AlexaAntiMouseAb~N/A	HA20421~B44R11C02	16110	59800	110	10940	9754	4118	42	45	45	53	25	47	100	100	0	4531	3797	1411	37	212	212	213	16	7	100	100	0	2.523	2.708	2.787	2.712	1.962	2.859	0.899	94	349	80	15214	13294	1.335	10895	4319	9709	3585	916839
7	11	14	Hs~Ref:NM_002799.2~uORF:IOH53883~RFU:7826.54	HA20421~B07R14C11	13290	19910	130	10937	10682	6268	58	38	38	41	10	24	100	100	0	3684	3143	1484	47	170	170	170	10	5	100	100	0	3.102	3.58	3.53	3.325	2.303	3.948	0.907	143	368	88	14413	13617	1.633	10899	3514	10644	2973	1527569
2	16	19	Hs~Ref:NM_001966.2~uORF:IOH62346~RFU:25300.43	HA20421~B02R19C16	9800	16420	130	10937	10751	4397	40	49	49	63	56	88	100	100	0	2110	1905	581	30	169	169	182	40	21	99	98	0	5.609	6.165	6.17	6.307	2.186	7.087	0.803	138	499	92	12829	12438	2.488	10888	1941	10702	1736	1483663
20	1	5	Hs~Ref:NM_080911.1~uORF:IOH43486~RFU:12294.98	HA20421~B20R05C01	15830	31580	110	10928	10427	3605	34	145	145	1770	2446	138	93	88	0	2779	2719	444	16	195	195	421	396	94	100	98	0	4.173	4.074	3.998	3.615	1.814	4.576	0.812	80	557	100	13367	12806	2.061	10783	2584	10282	2524	834154
19	10	14	Hs~Ref:NM_024038.2~uORF:IOH5926~RFU:27005.64	HA20421~B19R14C10	13120	33440	200	10914	11155	5543	49	48	48	89	231	259	100	100	0	3666	3242	1987	61	206	206	232	194	83	100	99	0	3.14	3.658	3.858	4.285	1.609	3.505	0.877	267	721	70	14326	14143	1.651	10866	3460	11107	3036	2978408
27	4	8	Hs~MGC:BC018736.1~uORF:IOH14106~RFU:15467.84	HA20421~B27R08C04	11900	41190	130	10909	9684	4133	42	40	40	46	18	39	100	100	0	1590	1408	542	38	195	195	196	13	6	100	100	0	7.791	7.951	7.78	8.501	1.827	8.267	0.909	137	459	91	12264	10857	2.962	10869	1395	9644	1213	1326721
25	6	3	Hs~Ref:NM_001207.2~uORF:IOH5823~RFU:23408.77	HA20421~B25R03C06	3310	40190	140	10896	10495	3496	33	49	49	95	123	129	100	100	0	4599	4071	1198	29	210	210	354	366	103	98	96	0	2.471	2.706	2.671	2.757	1.584	2.86	0.904	150	576	96	15236	14307	1.305	10847	4389	10446	3861	1574199
40	2	16	Hs~IVGN:NM_001206389~CAT_PHG0184~N/A	HA20421~B40R16C02	16070	56300	120	10894	12265	6135	50	48	48	60	58	96	100	100	0	247	248	13	5	232	232	233	19	8	35	6	0	723.067	763.563	705.923	793.986	2.533	816.33	0.245	107	464	94	10861	12233	9.498	10846	15	12217	16	1312307
44	15	4	Hs~Ref:NM_016648.1~uORF:IOH41297~RFU:27079.4	HA20421~B44R04C15	18710	58400	140	10874	9668	4690	48	59	59	146	193	132	100	100	0	3474	2807	1731	61	222	222	224	23	10	97	95	0	3.326	3.717	3.728	5.698	2.912	3.538	0.87	147	560	89	14067	12194	1.734	10815	3252	9609	2585	1421196
26	6	16	Hs~Ref:NM_006274.2~CAT_PHC1244~RFU:1168.89	HA20421~B26R16C06	7830	42820	130	10867	9612	3639	37	38	38	45	23	51	100	100	0	271	486	646	132	213	213	214	12	5	91	77	0	186.707	35.07	180.318	122.982	4.56	50.911	0.063	137	429	92	10887	9847	7.545	10829	58	9574	273	1316871
14	14	15	Hs~IVGN:NM_020996~CAT_PHG0174~N/A	HA20421~B14R15C14	9390	29070	120	10850	9353	3232	34	43	43	48	22	45	100	100	0	188	188	11	5	178	178	178	10	5	50	22	0	1080.7	931	648.778	776.852	1.993	936.835	0.169	110	496	83	10817	9320	10.078	10807	10	9310	10	1028805
16	1	22	ERa~N/A	HA20421~B16R22C01	15800	30490	120	10849	9637	4045	41	42	42	51	37	72	100	100	0	211	243	106	43	169	169	169	13	7	90	71	0	257.31	129.662	208.861	198.784	2.26	151.155	0.189	127	653	88	10849	9669	8.007	10807	42	9595	74	1223946
18	17	4	Hs~MGC:BC030290.1~uORF:IOH21571~RFU:5200.98	HA20421~B18R04C17	10000	31400	140	10847	10095	5534	54	44	44	77	109	141	100	100	0	1164	1108	618	55	183	183	266	198	74	80	72	0	11.012	10.866	10.551	14.424	2.378	10.771	0.889	150	473	86	11784	10976	3.461	10803	981	10051	925	1514218
11	18	6	Hs~Ref:NM_005884.2~uORF:IOH2475~RFU:27071.11	HA20421~B11R06C18	14700	22800	140	10844	10150	5573	54	48	48	73	85	116	100	100	0	3962	3286	1287	39	168	168	182	44	24	100	100	0	2.846	3.24	3.201	3.071	2.066	3.825	0.819	173	531	89	14590	13220	1.509	10796	3794	10102	3118	1755868
43	10	6	Hs~Ref:NM_000975.2~uORF:IOH1740~RFU:6975.8	HA20421~B43R06C10	13220	58810	110	10836	11677	6840	58	44	44	71	118	166	100	100	0	1189	997	385	38	220	220	238	79	33	89	84	0	11.137	14.972	15.026	16.836	2.586	17.99	0.753	114	426	89	11761	12410	3.477	10792	969	11633	777	1331149
17	21	15	Hs~Ref:NM_004302.3~CAT:PV4312~RFU:17431	HA20421~B17R15C21	6280	33620	120	10832	12033	5663	47	43	43	56	66	117	100	100	0	5323	4583	1631	35	181	181	181	16	8	100	100	0	2.098	2.724	2.666	2.818	1.956	2.982	0.892	120	499	90	15931	16392	1.069	10789	5142	11990	4402	1443994
1	15	2	Hs~MGC:BC021174.1~uORF:IOH10706~RFU:26493.87	HA20421~B01R02C15	5080	13020	160	10829	9942	3392	34	51	51	64	48	75	100	100	0	3058	2869	738	25	158	158	159	9	5	100	100	0	3.717	3.648	3.774	3.606	1.646	3.976	0.865	192	592	90	13678	12602	1.894	10778	2900	9891	2711	1908885
29	4	19	Hs~Ref:NM_003981.2~uORF:IOH5138~RFU:27058.26	HA20421~B29R19C04	2970	47900	160	10817	10444	2628	25	47	47	298	565	189	100	100	0	6058	5392	1798	33	225	225	295	156	52	100	99	0	1.846	2.012	1.913	2.252	1.909	1.962	0.863	208	549	96	16603	15564	0.885	10770	5833	10397	5167	2172295
9	1	11	AlexaAntiMouseAb~N/A	HA20421~B09R11C01	2290	23770	150	10813	7841	6251	79	42	42	129	352	272	95	73	0	2045	2191	1653	75	170	170	198	96	48	94	92	0	5.745	3.859	3.65	3.371	2.99	4.079	0.85	157	738	0	12646	9820	2.522	10771	1875	7799	2021	1231100
7	4	8	Hs~Ref:NM_014110.3~uORF:IOH39485~RFU:27045	HA20421~B07R08C04	11890	18710	140	10811	9567	3664	38	48	48	83	129	155	100	100	0	5388	4966	1304	26	176	176	187	34	18	100	100	0	2.065	1.987	2.094	1.887	1.816	2.157	0.876	153	508	90	15975	14309	1.046	10763	5212	9519	4790	1463708
8	19	19	Hs~Ref:NM_139355.1~uORF:IOH4506~RFU:21053.77	HA20421~B08R19C19	19390	20870	140	10791	9973	4019	40	47	47	73	75	102	100	100	0	4252	3830	1212	31	165	165	173	28	16	100	100	0	2.629	2.708	2.692	2.681	2.09	2.936	0.877	147	609	89	14831	13591	1.394	10744	4087	9926	3665	1466031
29	21	9	Hs~MGC:BC019039.2~uORF:IOH46089~RFU:27074.01	HA20421~B29R09C21	6340	45920	170	10776	10583	3649	34	42	42	50	27	54	100	100	0	4408	4136	952	23	229	229	229	16	6	100	100	0	2.569	2.698	2.813	2.69	1.837	3.131	0.769	271	555	89	14913	14448	1.361	10734	4179	10541	3907	2867999
13	12	18	Hs~Ref:NM_004175.3~uORF:IOH56705~RFU:3344.11	HA20421~B13R18C12	4520	29730	110	10769	10199	5199	50	37	37	42	18	42	100	100	0	722	714	261	36	173	173	173	11	6	100	100	0	19.548	18.784	18.354	18.592	1.467	20.212	0.907	102	486	89	11281	10703	4.289	10732	549	10162	541	1040318
37	8	5	Hs~MGC:BC010901.1~uORF:IOH13498~RFU:17134.85	HA20421~B37R05C08	3750	54120	150	10762	9661	5112	52	43	43	67	70	104	100	100	0	6529	5069	2585	50	228	228	249	73	29	100	100	0	1.701	1.987	2.114	2.144	1.781	2.059	0.903	184	599	95	17020	14459	0.767	10719	6301	9618	4841	1777552
27	12	8	Hs~Ref:NM_145109.1~uORF:IOH21715~RFU:27056.61	HA20421~B27R08C12	13500	41210	150	10759	10592	3057	28	38	38	51	48	94	100	100	0	7040	6421	1610	25	201	201	208	26	12	100	100	0	1.568	1.697	1.696	1.724	1.637	1.79	0.867	217	482	87	17560	16774	0.649	10721	6839	10554	6220	2298356
20	11	14	Hs~MGC:BC009458.1~uORF:IOH13468~RFU:7703.46	HA20421~B20R14C11	17820	33390	120	10758	10358	3952	38	65	65	96	93	96	100	100	0	3070	2814	614	21	193	193	270	287	106	98	98	0	3.717	3.927	3.88	3.779	1.681	4.357	0.892	115	537	83	13570	12914	1.894	10693	2877	10293	2621	1191139
12	18	4	Hs~MGC:BC033708.1~uORF:IOH21753~RFU:27007.71	HA20421~B12R04C18	19210	22390	150	10752	9401	4445	47	48	48	100	190	190	100	100	0	2970	2338	1046	44	168	168	212	144	67	100	99	0	3.82	4.31	4.574	4.401	1.581	4.66	0.874	200	488	82	13506	11523	1.934	10704	2802	9353	2170	1880284
18	5	19	Hs~MGC:BC067826.1~uORF:IOH61627~RFU:13216.89	HA20421~B18R19C05	7590	34410	140	10732	9436	4435	47	45	45	62	50	80	100	100	0	2636	2145	916	42	185	185	189	21	11	100	99	0	4.36	4.791	4.792	5.218	1.981	4.983	0.918	157	518	88	13138	11351	2.124	10687	2451	9391	1960	1481491
4	18	20	Hs~Ref:XM_378660.1~uORF:IOH44637~RFU:12220.29	HA20421~B04R20C18	19200	16600	140	10718	9627	4294	44	47	47	66	65	98	100	100	0	3158	2922	996	34	161	161	162	17	10	100	100	0	3.561	3.47	3.493	3.344	2.132	4.001	0.79	165	598	95	13668	12341	1.832	10671	2997	9580	2761	1588478
17	21	22	AlexaAntiMouseAb~N/A	HA20421~B17R22C21	6270	35010	110	10717	9403	2951	31	38	38	41	13	31	100	100	0	3283	2865	912	31	182	182	182	11	6	100	100	0	3.444	3.49	3.503	3.727	1.674	3.569	0.92	103	475	87	13780	12048	1.784	10679	3101	9365	2683	968500
22	13	19	Hs~MGC:BC066958.1~uORF:IOH61486~RFU:27087.27	HA20421~B22R19C13	9190	38880	110	10709	10683	2042	19	66	66	591	1200	203	100	100	0	5658	6362	2913	45	216	216	546	916	167	100	98	0	1.956	1.727	2.017	1.81	1.581	1.553	0.542	80	442	100	16085	16763	0.968	10643	5442	10617	6146	854616
32	2	11	AlexaAntiMouseAb~N/A	HA20421~B32R11C02	16070	46310	120	10696	8915	3912	43	39	39	44	15	34	99	99	0	4052	3247	1425	43	196	196	199	19	9	100	100	0	2.764	2.909	2.994	3.033	3.272	3.045	0.867	104	523	93	14513	11927	1.467	10657	3856	8876	3051	927158
5	21	22	AlexaAntiMouseAb~N/A	HA20421~B05R22C21	6310	21530	110	10693	8902	3577	40	42	42	48	25	52	100	100	0	2919	2457	894	36	163	163	163	10	6	100	100	0	3.865	3.862	3.959	3.986	1.849	3.978	0.947	98	517	88	13407	11154	1.95	10651	2756	8860	2294	872415
8	14	13	Hs~MGC:BC013161.1~uORF:IOH10686~RFU:2847.44	HA20421~B08R13C14	18390	19670	120	10690	11630	6884	59	44	44	50	22	44	100	100	0	676	665	143	21	162	162	167	22	13	100	100	0	20.712	23.034	21.357	19.018	1.645	28.512	0.874	103	517	90	11160	12089	4.372	10646	514	11586	503	1197906
15	8	20	Hs~Ref:NM_015414.2~uORF:IOH4985~RFU:18161.56	HA20421~B15R20C08	12680	30100	120	10683	10184	4238	41	40	40	45	17	37	100	100	0	2777	2449	999	40	183	183	183	12	6	100	100	0	4.103	4.477	4.505	4.978	1.895	4.564	0.933	121	498	89	13237	12410	2.037	10643	2594	10144	2266	1232219
20	13	6	Hs~Ref:NM_002363.1~uORF:IOH10928~RFU:7623.85	HA20421~B20R06C13	18210	31790	150	10677	9365	5496	58	58	58	121	197	162	100	100	0	1540	1343	905	67	179	179	177	12	6	98	97	0	7.802	7.996	8.077	13.467	2.912	7.701	0.84	180	474	88	11980	10471	2.964	10619	1361	9307	1164	1685612
27	2	11	AlexaAntiMouseAb~N/A	HA20421~B27R11C02	11500	41800	120	10668	9212	4532	49	39	39	43	13	30	100	100	0	4167	3344	1562	46	194	194	194	13	6	100	100	0	2.675	2.912	3.021	3.061	2.074	3.019	0.913	103	550	91	14602	12323	1.42	10629	3973	9173	3150	948792
37	3	3	Hs~Ref:NM_033671.1~uORF:IOH43039~RFU:27079.4	HA20421~B37R03C03	2730	53750	210	10664	11621	4330	37	46	46	65	66	101	100	100	0	2190	2764	1765	63	221	221	246	77	31	99	99	0	5.393	4.552	5.514	5.809	1.851	4.211	0.795	303	1037	82	12587	14118	2.431	10618	1969	11575	2543	3521248
21	5	12	Hs~MGC:BC002921.2~uORF:IOH6311~RFU:20496.85	HA20421~B21R12C05	3090	37540	210	10659	10424	6730	64	43	43	89	187	210	100	100	0	2724	2287	1298	56	192	192	269	287	106	98	82	0	4.193	4.955	5.062	4.938	1.412	5.252	0.927	262	1040	72	13148	12476	2.068	10616	2532	10381	2095	2731141
19	3	21	Hs~Ref:XM_379060.1~uORF:IOH44018~RFU:27035.89	HA20421~B19R21C03	11700	34810	150	10651	8783	5124	58	39	39	59	82	138	100	98	0	6896	5144	2902	56	181	181	217	118	54	99	97	0	1.58	1.762	1.777	1.806	2.143	1.832	0.902	199	551	82	17327	13707	0.66	10612	6715	8744	4963	1747849
11	11	2	Hs~MGC:BC034401.1~uORF:IOH22782~RFU:22135.09	HA20421~B11R02C11	13330	22000	140	10646	10666	3610	33	45	45	53	26	49	100	100	0	6408	5831	1766	30	179	179	180	16	8	100	100	0	1.702	1.879	1.856	2.06	2.327	1.994	0.835	160	648	93	16830	16273	0.767	10601	6229	10621	5652	1706560
45	2	9	Hs~MGC:BC009894.2~uORF:IOH14557~RFU:27043.76	HA20421~B45R09C02	2560	63920	130	10641	10001	3897	38	64	64	153	235	153	100	100	0	5979	5775	1267	21	242	242	319	195	61	100	100	0	1.844	1.796	1.875	1.67	1.726	2.053	0.823	130	450	85	16314	15470	0.883	10577	5737	9937	5533	1300193
29	3	19	Hs~Ref:NM_003981.2~uORF:IOH5138~RFU:27044.59	HA20421~B29R19C03	2760	47890	150	10641	10459	2365	22	156	156	635	770	121	100	100	0	6053	5861	1028	17	307	307	394	199	50	100	99	0	1.825	1.855	1.815	1.875	1.536	1.871	0.839	181	532	92	16231	15857	0.868	10485	5746	10303	5554	1893025
26	17	8	Hs~Ref:NM_144982.1~uORF:IOH12275~RFU:27073.6	HA20421~B26R08C17	10020	41220	140	10635	10416	5040	48	46	46	151	267	176	100	100	0	3387	3519	3003	85	211	211	228	43	18	98	96	0	3.334	3.135	4.073	4.084	3.422	3.67	0.348	165	481	92	13765	13678	1.737	10589	3176	10370	3308	1718651
19	2	8	Hs~MGC:BC021561.1~uORF:IOH14131~RFU:21258.42	HA20421~B19R08C02	11500	32210	140	10629	9646	4861	50	43	43	63	63	100	100	100	0	3327	2721	1114	40	186	186	199	34	17	100	100	0	3.37	3.788	3.671	3.861	1.95	4.13	0.894	159	526	95	13727	12138	1.753	10586	3141	9603	2535	1533784
41	14	2	Hs~MGC:BC029382.1~uORF:IOH23139~RFU:19173.02	HA20421~B41R02C14	4970	58010	120	10625	10784	3759	34	41	41	55	61	110	100	100	0	3188	2760	1099	39	212	212	217	31	14	100	100	0	3.556	4.216	4.035	4.841	1.957	4.44	0.817	139	493	93	13560	13291	1.83	10584	2976	10743	2548	1499017
13	6	7	Hs~Ref:NM_033256.1~uORF:IOH13214~RFU:23219.38	HA20421~B13R07C06	3320	27530	140	10621	10459	3267	31	62	62	183	341	186	100	100	0	3018	2668	709	26	206	206	293	179	61	100	97	0	3.755	4.223	4.333	4.303	1.563	4.566	0.884	158	542	95	13371	12859	1.909	10559	2812	10397	2462	1652462
45	18	3	Hs~Ref:NM_012396.1~uORF:IOH12626~RFU:24881.68	HA20421~B45R03C18	5760	62710	130	10618	10569	3373	31	62	62	89	74	83	100	100	0	6030	4888	2412	49	195	195	246	174	70	95	91	0	1.809	2.239	2.11	3.143	3.298	2.219	0.75	143	477	81	16391	15200	0.855	10556	5835	10507	4693	1511384
4	19	22	ERa~N/A	HA20421~B04R22C19	19400	17010	130	10616	10334	2415	23	46	46	51	17	33	100	100	0	180	183	25	13	152	152	153	11	7	77	63	0	377.5	331.871	292.357	367.836	2.573	339.532	0.41	135	644	91	10598	10319	8.56	10570	28	10288	31	1395041
23	12	17	Hs~Ref:NM_130807.1~uORF:IOH10112~RFU:27040.03	HA20421~B23R17C12	13540	38530	190	10613	10117	3476	34	39	39	101	477	472	100	100	0	7701	7166	1691	23	195	195	257	582	226	100	98	0	1.409	1.446	1.455	1.41	1.542	1.537	0.864	266	655	88	18080	17049	0.494	10574	7506	10078	6971	2691066
4	1	8	Hs~MGC:BC044632.1~uORF:IOH62971~RFU:27086.03	HA20421~B04R08C01	15790	14200	150	10613	9819	3876	39	49	49	54	26	48	100	100	0	4933	4071	1718	42	162	162	240	231	96	92	90	0	2.214	2.499	2.448	3.064	2.709	2.624	0.828	174	652	92	15335	13679	1.147	10564	4771	9770	3909	1708527
38	3	7	Hs~Ref:NM_006337.3~uORF:IOH12378~RFU:14287.4	HA20421~B38R07C03	7240	54530	130	10602	9264	3975	42	42	42	52	37	71	100	100	0	1804	1771	981	55	219	219	219	15	6	99	99	0	6.662	5.942	5.824	8.177	2.494	5.732	0.86	134	505	93	12145	10774	2.736	10560	1585	9222	1552	1241315
43	16	4	Hs~MGC:BC042606.1~uORF:IOH26783~RFU:3508.2	HA20421~B43R04C16	14420	58440	140	10598	13891	9403	67	50	50	112	211	188	100	100	0	577	649	381	58	213	213	222	42	18	95	71	0	28.978	31.745	47.003	44.259	2.894	41.298	0.5	144	434	44	10912	14277	4.857	10548	364	13841	436	2000310
23	6	15	Hs~MGC:BC060319.1~uORF:IOH29295~RFU:24769.52	HA20421~B23R15C06	12330	38110	140	10597	9498	5144	54	40	40	43	13	30	100	100	0	4291	3431	1958	57	188	188	188	11	5	100	98	0	2.573	2.916	2.971	3.994	2.855	3.027	0.835	149	422	97	14660	12701	1.363	10557	4103	9458	3243	1415196
2	2	22	ERa~N/A	HA20421~B02R22C02	6990	17030	120	10597	9950	3432	34	44	44	58	41	70	100	100	0	203	201	16	7	167	167	168	12	7	85	69	0	293.139	291.353	279.306	314.563	1.782	315.939	0.601	127	582	84	10589	9940	8.195	10553	36	9906	34	1263614
40	15	4	Hs~Ref:NM_022140.2~uORF:IOH38016~RFU:27075.67	HA20421~B40R04C15	18660	53880	110	10594	10721	2952	27	1186	1186	2825	3051	108	100	87	0	3486	3461	330	9	325	325	1144	1047	91	100	100	0	2.976	3.04	2.943	2.904	1.372	3.896	0.621	80	537	100	12569	12671	1.574	9408	3161	9535	3136	857688
28	1	11	AlexaAntiMouseAb~N/A	HA20421~B28R11C01	15840	41790	120	10591	8616	4377	50	40	40	47	24	51	100	100	0	3925	2967	1549	52	186	186	215	84	39	96	91	0	2.822	3.084	3.096	3.521	2.518	3.185	0.879	112	536	95	14290	11357	1.497	10551	3739	8576	2781	964993
18	12	4	Hs~Ref:NM_016304.2~uORF:IOH7552~RFU:15658.88	HA20421~B18R04C12	9010	31410	130	10591	9366	3671	39	45	45	70	78	111	100	100	0	3022	2588	1114	43	201	201	212	96	45	97	94	0	3.738	3.905	3.633	4.402	2.214	3.992	0.873	144	497	97	13367	11708	1.902	10546	2821	9321	2387	1348727
48	7	3	Hs~Ref:NM_207047.1~uORF:IOH44493~RFU:26997.76	HA20421~B48R03C07	17110	62650	130	10589	10971	3636	33	86	86	192	232	120	100	100	0	6324	5615	1829	32	244	244	362	197	54	100	99	0	1.727	2.027	1.79	2.178	2.062	2.202	0.76	149	479	93	16583	16256	0.789	10503	6080	10885	5371	1634673
16	3	20	Hs~Ref:NM_015891.2~uORF:IOH44384~RFU:26770.26	HA20421~B16R20C03	16210	30090	120	10586	10781	5057	46	43	43	52	34	65	100	100	0	2156	1830	793	43	172	172	173	14	8	98	96	0	5.314	6.476	5.88	8.19	3.314	8.142	0.612	135	473	93	12527	12396	2.41	10543	1984	10738	1658	1455434
20	17	9	Hs~Ref:NM_013375.2~uORF:IOH1920~RFU:8853.25	HA20421~B20R09C17	19020	32400	130	10583	10250	3676	35	60	60	127	180	141	100	100	0	2302	1958	831	42	180	180	228	123	53	94	92	0	4.959	5.731	5.653	6.975	2.209	5.814	0.87	127	504	91	12645	11968	2.31	10523	2122	10190	1778	1301689
11	10	17	Hs~Ref:NM_012341.2~uORF:IOH26105~RFU:11143.31	HA20421~B11R17C10	13100	25020	130	10566	9804	3046	31	40	40	43	15	34	100	100	0	1723	1502	655	43	171	171	172	10	5	99	99	0	6.782	7.336	6.865	9.458	2.401	7.312	0.845	137	531	88	12078	11095	2.762	10526	1552	9764	1331	1343133
44	12	14	Hs~MGC:BC016828.1~uORF:IOH23007~RFU:5729.82	HA20421~B44R14C12	18120	60420	120	10552	10759	4433	41	223	223	478	778	162	100	100	0	1365	1322	583	44	341	341	413	222	53	87	77	0	10.087	10.74	10.695	11.904	2.44	14.084	0.428	118	434	88	11353	11517	3.334	10329	1024	10536	981	1269590
40	11	15	Hs~Ref:NM_003517.2~uORF:IOH29296~RFU:4520.97	HA20421~B40R15C11	17860	56100	150	10548	12731	7847	61	58	58	179	296	165	100	100	0	1626	1914	1316	68	231	231	245	53	21	96	92	0	7.52	7.53	8.029	10.218	2.385	7.403	0.838	154	504	78	11885	14356	2.911	10490	1395	12673	1683	1960575
36	2	11	AlexaAntiMouseAb~N/A	HA20421~B36R11C02	16070	50830	120	10546	8378	3723	44	39	39	43	16	37	100	100	0	4024	3192	1464	45	219	219	221	18	8	100	100	0	2.761	2.805	2.835	3.436	2.676	2.894	0.87	104	571	91	14312	11312	1.465	10507	3805	8339	2973	871322
1	1	22	ERa~N/A	HA20421~B01R22C01	2270	17030	140	10546	9794	3469	35	45	45	64	70	109	100	100	0	215	213	35	16	163	163	163	10	6	91	80	0	201.942	194.98	209.325	220.497	1.737	201.298	0.607	156	882	89	10553	9799	7.658	10501	52	9749	50	1527932
2	22	22	AlexaAntiMouseAb~N/A	HA20421~B02R22C22	11000	17020	110	10545	9229	3567	38	46	46	50	22	44	100	100	0	3046	2627	948	36	168	168	168	10	5	100	100	0	3.648	3.734	3.745	3.855	1.84	3.912	0.898	96	566	91	13377	11642	1.867	10499	2878	9183	2459	885997
26	20	17	Hs~Ref:NM_031845.1~uORF:IOH37776~RFU:27059.09	HA20421~B26R17C20	10640	43050	180	10543	11387	3999	35	66	66	414	805	194	100	100	0	2749	2483	518	20	221	221	356	211	59	100	100	0	4.144	5.005	4.731	4.862	1.333	5.802	0.822	239	708	52	13005	13583	2.051	10477	2528	11321	2262	2721434
40	4	6	Hs~Ref:NM_032345.1~uORF:IOH6625~RFU:27024.28	HA20421~B40R06C04	16460	54300	110	10542	11157	1835	16	399	399	691	797	115	100	100	0	1658	1671	353	21	325	325	1718	1770	103	4	0	0	7.609	7.993	8.121	8.135	1.507	56.103	0.004	101	368	91	11476	12104	2.928	10143	1333	10758	1346	1126881
22	1	19	Hs~Ref:NM_033421.2~uORF:IOH43365~RFU:20352.23	HA20421~B22R19C01	6790	38890	140	10539	9815	5959	60	49	49	99	177	178	100	99	0	3185	2415	1223	50	202	202	219	69	31	100	99	0	3.517	4.413	4.343	4.267	1.76	4.93	0.863	201	564	71	13473	11979	1.814	10490	2983	9766	2213	1972851
24	6	18	Hs~MGC:BC047536.1~uORF:IOH27737~RFU:27041.27	HA20421~B24R18C06	16840	38720	160	10538	9929	6085	61	45	45	57	53	92	100	100	0	1634	1461	1023	70	194	194	209	58	27	99	98	0	7.287	7.801	8.683	9.217	1.734	7.831	0.772	237	534	89	11933	11151	2.865	10493	1440	9884	1267	2353173
32	13	16	Hs~MGC:BC015875.1~uORF:IOH62816~RFU:27046.66	HA20421~B32R16C13	18270	47300	130	10536	10738	6385	59	58	58	75	61	81	100	99	0	5627	5212	1558	29	209	209	244	72	29	100	100	0	1.934	2.135	2.08	1.716	2.472	2.695	0.794	130	462	87	15896	15683	0.952	10478	5418	10680	5003	1395906
17	4	1	ERa~N/A	HA20421~B17R01C04	2870	30800	110	10533	9736	2680	27	44	44	59	51	86	100	100	0	219	217	19	8	179	179	179	12	6	90	79	0	262.225	255.053	254.963	281.801	1.819	288.924	0.593	121	494	88	10529	9730	8.035	10489	40	9692	38	1178024
9	22	22	AlexaAntiMouseAb~N/A	HA20421~B09R22C22	6490	25980	90	10529	9651	2608	27	41	41	45	13	28	100	100	0	2936	2473	910	36	171	171	172	11	6	100	100	0	3.793	4.175	4.062	4.942	2.102	4.219	0.86	80	361	95	13253	11912	1.923	10488	2765	9610	2302	772080
7	3	13	Hs~Ref:NM_006912.3~uORF:IOH29584~RFU:15718.5	HA20421~B07R13C03	11680	19710	140	10527	8462	4807	56	46	46	57	31	54	100	100	0	3375	2677	1310	48	176	176	227	171	75	92	88	0	3.276	3.365	3.326	3.567	2.212	3.702	0.876	153	403	91	13680	10917	1.712	10481	3199	8416	2501	1294702
25	4	8	Hs~MGC:BC021930.1~uORF:IOH13703~RFU:27065.72	HA20421~B25R08C04	2900	41200	140	10514	9576	3808	39	45	45	79	93	117	100	100	0	3153	2687	1261	46	209	209	210	16	7	100	100	0	3.556	3.846	3.725	4.772	2.165	3.811	0.889	160	476	94	13413	12009	1.83	10469	2944	9531	2478	1532204
28	1	8	Hs~Ref:NM_001002269.1~uORF:IOH59989~RFU:27076.5	HA20421~B28R08C01	15830	41200	110	10513	10751	2823	26	47	47	207	465	224	100	100	0	3994	4024	181	4	197	197	513	840	163	100	100	0	2.756	2.797	2.757	2.709	1.296	3.394	0.617	80	444	100	14263	14531	1.463	10466	3797	10704	3827	860092
37	4	3	Hs~Ref:NM_033671.1~uORF:IOH43039~RFU:27085.61	HA20421~B37R03C04	2930	53740	210	10503	10449	4272	40	45	45	62	60	96	100	100	0	1901	2765	1814	65	221	221	294	261	88	98	95	0	6.225	4.09	5.062	5.184	1.961	3.786	0.785	315	1062	73	12138	12948	2.638	10458	1680	10404	2544	3291294
7	14	6	Hs~Ref:NM_002713.2~uORF:IOH45768~RFU:27028.01	HA20421~B07R06C14	13900	18300	150	10497	9667	4235	43	44	44	95	182	191	100	100	0	5088	4332	1670	38	173	173	189	59	31	100	99	0	2.127	2.314	2.36	2.404	1.659	2.429	0.916	176	530	96	15368	13782	1.089	10453	4915	9623	4159	1701354
3	11	14	Hs~Ref:NM_017772.2~uORF:IOH42187~RFU:27093.49	HA20421~B03R14C11	13300	15410	140	10497	10052	4582	45	55	55	99	114	115	100	100	0	8527	6719	3109	46	172	172	178	20	11	100	100	0	1.25	1.527	1.437	1.837	2.451	1.543	0.859	164	540	90	18797	16544	0.322	10442	8355	9997	6547	1648498
37	22	9	Hs~Ref:NM_004728.2~uORF:IOH46173~RFU:10373.39	HA20421~B37R09C22	6550	54920	120	10494	10817	4064	37	38	38	42	12	28	100	100	0	1695	1539	1107	71	208	208	207	12	5	100	99	0	7.032	8.098	8.801	10.751	2.422	8.483	0.549	113	594	90	11943	12110	2.814	10456	1487	10779	1331	1222350
5	19	22	ERa~N/A	HA20421~B05R22C19	5900	21510	110	10492	10132	2895	28	45	45	51	26	50	100	100	0	217	216	24	11	164	164	164	10	6	98	90	0	197.113	193.981	214.05	206.401	1.659	218.618	0.652	120	481	88	10500	10139	7.623	10447	53	10087	52	1215787
21	10	3	Hs~Ref:NM_018990.1~uORF:IOH27033~RFU:17579.57	HA20421~B21R03C10	4110	35710	140	10488	9754	3872	39	53	53	93	99	106	100	100	0	4008	3579	1057	29	200	200	211	39	18	100	100	0	2.74	2.871	2.967	2.812	1.801	3.136	0.882	169	581	94	14243	13080	1.454	10435	3808	9701	3379	1648349
23	7	12	Hs~MGC:BC032347.1~uORF:IOH21704~RFU:13455.58	HA20421~B23R12C07	12520	37520	160	10487	9626	6291	65	40	40	59	65	110	100	100	0	2714	2138	1548	72	184	184	187	17	9	100	97	0	4.129	4.906	5.616	8.211	2.814	4.972	0.806	203	672	75	12977	11540	2.046	10447	2530	9586	1954	1953989
17	22	22	AlexaAntiMouseAb~N/A	HA20421~B17R22C22	6480	35010	110	10464	8786	3344	38	37	37	41	14	34	100	100	0	3123	2680	884	32	180	180	180	12	6	100	100	0	3.543	3.5	3.588	3.541	1.8	3.696	0.902	104	549	94	13370	11249	1.825	10427	2943	8749	2500	913789
12	7	13	Hs~Ref:NM_001001550.1~uORF:IOH13204~RFU:9014.12	HA20421~B12R13C07	17010	24190	130	10464	9596	4247	44	54	54	68	40	58	100	100	0	3736	3224	1257	38	176	176	226	183	80	95	92	0	2.924	3.131	3.037	3.284	2.307	3.386	0.867	135	507	93	13970	12590	1.548	10410	3560	9542	3048	1295402
21	22	9	Hs~MGC:BC005840.2~uORF:IOH46093~RFU:17162.39	HA20421~B21R09C22	6500	36910	110	10456	10749	1946	18	58	58	191	461	241	100	100	0	4124	4080	489	11	217	217	576	687	119	100	100	0	2.661	2.768	2.755	2.75	1.191	3.418	0.756	80	521	100	14305	14554	1.412	10398	3907	10691	3863	859896
32	6	16	Hs~Ref:NM_002752.3~CAT:PV3620~RFU:517.05	HA20421~B32R16C06	16870	47300	130	10452	20977	20928	99	44	44	63	120	190	100	100	0	232	459	405	88	208	208	231	102	44	27	26	0	433.667	83.398	721.835	163.319	24.44	-355.891	0.015	146	439	58	10432	21184	8.76	10408	24	20933	251	3062570
13	17	19	Hs~Ref:NM_001009880.1~uORF:IOH42078~RFU:27071.11	HA20421~B13R19C17	5500	29970	170	10448	10037	3477	34	41	41	49	33	67	100	100	0	3962	3726	993	26	179	179	181	20	11	100	100	0	2.751	2.818	2.826	2.849	1.744	3.111	0.838	260	550	85	14190	13543	1.46	10407	3783	9996	3547	2609641
40	3	6	Hs~Ref:NM_032345.1~uORF:IOH6625~RFU:27035.06	HA20421~B40R06C03	16260	54300	120	10443	10300	2196	21	220	220	643	760	118	100	100	0	1743	1717	293	17	259	259	259	26	10	100	100	0	6.889	6.914	6.947	7.064	1.622	7.624	0.709	114	342	92	11707	11538	2.784	10223	1484	10080	1458	1174150
32	15	17	Hs~MGC:BC010963.1~uORF:IOH13789~RFU:3332.51	HA20421~B32R17C15	18670	47500	110	10442	10955	4750	43	54	54	74	54	72	100	100	0	783	737	220	29	193	193	193	14	7	98	94	0	17.607	20.039	19.342	21.894	1.878	21.162	0.916	95	324	83	10978	11445	4.138	10388	590	10901	544	1040724
1	19	20	Hs~Ref:XM_003960444.1~uORF:IOH50171~RFU:27050.8	HA20421~B01R20C19	5870	16630	140	10421	9598	3285	34	51	51	69	61	88	100	100	0	3812	3227	1192	36	166	166	166	11	6	100	99	0	2.844	3.119	2.901	3.695	2.688	3.261	0.839	163	542	91	14016	12608	1.508	10370	3646	9547	3061	1564398
10	13	20	Hs~MGC:NM_178553.2~uORF:IOH25885~RFU:27069.87	HA20421~B10R20C13	9210	25570	150	10415	10453	4210	40	59	59	114	123	107	100	100	0	3563	2968	1188	40	190	190	199	29	14	100	99	0	3.07	3.742	3.881	4.305	2.183	3.915	0.864	178	621	87	13729	13172	1.618	10356	3373	10394	2778	1860679
7	8	6	Hs~Ref:NM_203284.1~uORF:IOH39978~RFU:15777.05	HA20421~B07R06C08	12690	18310	140	10412	9642	3493	36	47	47	61	41	67	100	100	0	2420	2191	634	28	176	176	181	22	12	100	100	0	4.619	4.762	4.72	4.932	1.864	5.17	0.866	140	554	90	12609	11610	2.208	10365	2244	9595	2015	1349873
23	11	12	Hs~MGC:NM_178152.1~uORF:IOH20954~RFU:21504.4	HA20421~B23R12C11	13320	37500	110	10397	10702	2742	25	54	54	1335	2832	212	100	100	0	3899	5102	3714	72	201	201	736	1073	145	100	100	0	2.797	2.173	2.759	2.421	1.514	2.008	0.601	80	427	100	14041	15549	1.484	10343	3698	10648	4901	856165
8	22	9	Hs~Ref:NM_004596.1~uORF:IOH6628~RFU:26857.28	HA20421~B08R09C22	19990	18870	130	10394	10106	4182	41	47	47	67	94	140	100	100	0	2216	1795	813	45	150	150	155	37	23	97	95	0	5.008	6.115	6.096	7.374	2.349	6.293	0.866	128	621	80	12413	11704	2.324	10347	2066	10059	1645	1293589
2	21	22	AlexaAntiMouseAb~N/A	HA20421~B02R22C21	10800	17020	110	10391	8821	3613	40	41	41	46	15	32	100	100	0	3055	2556	977	38	166	166	166	8	4	100	100	0	3.583	3.674	3.743	3.898	2.069	3.872	0.887	99	523	92	13239	11170	1.841	10350	2889	8780	2390	873262
5	5	6	Hs~MGC:BC063500.1~uORF:IOH39897~RFU:20831.68	HA20421~B05R06C05	3100	18330	140	10391	9168	4068	44	42	42	49	29	59	100	100	0	3464	2943	1184	40	165	165	165	11	6	100	100	0	3.137	3.285	3.297	3.601	1.994	3.439	0.91	147	519	89	13648	11904	1.649	10349	3299	9126	2778	1347712
22	9	13	Hs~MGC:BC033792.1~uORF:IOH21794~RFU:17252.42	HA20421~B22R13C09	8390	37700	160	10383	9624	5990	62	38	38	53	68	128	100	100	0	3908	2901	1961	67	198	198	204	32	15	100	100	0	2.788	3.546	4.108	4.282	2.271	3.779	0.751	207	501	85	14055	12289	1.479	10345	3710	9586	2703	1992143
37	19	22	ERa~N/A	HA20421~B37R22C19	5950	57520	120	10371	10197	3350	32	42	42	53	36	67	100	100	0	259	261	38	14	198	198	198	11	5	98	87	0	169.328	161.19	182.692	176.955	1.687	170.852	0.58	124	635	93	10390	10218	7.404	10329	61	10155	63	1264473
5	17	5	Hs~Ref:NM_004088.1~uORF:IOH11297~RFU:11316.97	HA20421~B05R05C17	5510	18120	130	10364	10523	2507	23	86	86	299	442	147	100	100	0	2706	2519	620	24	242	242	457	401	87	95	93	0	4.171	4.584	4.426	4.802	1.594	5.026	0.799	137	471	89	12742	12714	2.06	10278	2464	10437	2277	1441620
24	19	3	Hs~Ref:NM_172160.1~uORF:IOH35727~RFU:27054.12	HA20421~B24R03C19	19450	35690	120	10360	10356	2067	19	249	249	832	1221	146	100	100	0	7610	7388	1084	14	231	231	712	868	121	100	100	0	1.37	1.412	1.364	1.404	1.342	1.596	0.788	110	299	91	17490	17264	0.454	10111	7379	10107	7157	1139156
7	13	6	Hs~Ref:NM_002713.2~uORF:IOH45768~RFU:27022.21	HA20421~B07R06C13	13700	18310	140	10350	9608	3225	33	47	47	122	208	170	100	100	0	5039	4436	1390	31	174	174	212	85	40	100	100	0	2.118	2.243	2.255	2.339	1.6	2.329	0.916	171	511	97	15168	13823	1.083	10303	4865	9561	4262	1643050
32	22	20	Hs~MGC:BC033237.1~uORF:IOH23268~RFU:23730.73	HA20421~B32R20C22	20070	48100	110	10348	10404	1609	15	56	56	294	713	242	100	100	0	9422	9347	1326	14	208	208	606	1033	170	100	100	0	1.117	1.132	1.148	1.134	1.206	1.143	0.825	80	485	100	19506	19487	0.16	10292	9214	10348	9139	832284
24	19	4	Hs~Ref:NM_032943.2~uORF:IOH38478~RFU:8838	HA20421~B24R04C19	19450	35880	120	10345	10784	2670	24	141	141	877	1293	147	100	100	0	1786	1742	396	22	203	203	327	356	108	95	93	0	6.446	6.916	6.799	7.138	1.58	7.759	0.678	121	424	87	11787	12182	2.688	10204	1583	10643	1539	1304859
34	6	13	Hs~Ref:NM_003994.4~uORF:IOH44526~RFU:6731.93	HA20421~B34R13C06	7830	51220	120	10343	10426	4098	39	38	38	43	16	37	100	100	0	1532	1424	608	42	226	226	226	14	6	100	100	0	7.891	8.671	8.393	9.673	1.691	8.581	0.924	108	496	92	11611	11586	2.98	10305	1306	10388	1198	1126007
14	13	16	Hs~MGC:BC022543.1~uORF:IOH55985~RFU:11258.42	HA20421~B14R16C13	9190	29280	120	10326	9181	3372	36	41	41	49	28	57	100	100	0	2376	1994	766	38	177	177	177	9	5	100	100	0	4.677	5.03	5.148	5.813	2.164	5.219	0.869	121	489	91	12484	10957	2.226	10285	2199	9140	1817	1110890
24	17	12	Hs~Ref:NM_207356.1~uORF:IOH40044~RFU:17592.86	HA20421~B24R12C17	19040	37490	170	10324	8186	5128	62	46	46	78	124	158	100	100	0	4097	2910	1757	60	194	194	222	92	41	99	98	0	2.633	2.997	2.959	3.054	1.86	3.147	0.891	204	570	85	14181	10856	1.397	10278	3903	8140	2716	1669995
21	21	15	Hs~Ref:NM_001007071.1~CAT:PV3831~RFU:16094.4	HA20421~B21R15C21	6310	38110	120	10320	8870	3827	43	37	37	45	31	68	100	100	0	2517	2233	957	42	192	192	193	12	6	100	100	0	4.423	4.328	4.293	4.675	2.013	4.535	0.867	125	481	90	12608	10874	2.145	10283	2325	8833	2041	1108705
47	10	16	Hs~Ref:NM_173822.1~uORF:IOH27491~RFU:27030.08	HA20421~B47R16C10	13210	65290	120	10318	10444	3173	30	93	93	156	163	104	100	100	0	5754	5055	1577	31	309	309	451	322	71	96	92	0	1.878	2.181	2.057	2.38	2.189	2.332	0.79	125	479	86	15670	15097	0.909	10225	5445	10351	4746	1305464
5	21	3	Hs~MGC:BC029796.1~uORF:IOH22647~RFU:26984.5	HA20421~B05R03C21	6300	17720	170	10317	10009	4075	40	52	52	123	228	185	100	100	0	5974	4866	1894	38	178	178	212	125	58	100	100	0	1.771	2.124	2.182	2.126	1.494	2.269	0.853	227	468	79	16061	14645	0.825	10265	5796	9957	4688	2272080
4	16	6	Hs~MGC:BC022344.1~uORF:IOH14799~RFU:27043.34	HA20421~B04R06C16	18800	13800	140	10315	9509	3232	33	52	52	89	159	178	100	100	0	3823	3613	805	22	155	155	179	84	46	100	100	0	2.798	2.735	2.829	2.631	1.599	3.011	0.858	165	468	89	13931	12915	1.484	10263	3668	9457	3458	1569062
22	2	22	ERa~N/A	HA20421~B22R22C02	7000	39480	120	10314	10051	2702	26	40	40	50	33	66	100	100	0	243	244	23	9	198	198	200	13	6	96	84	0	228.311	217.63	240.632	230.787	1.592	240.25	0.566	126	540	89	10319	10057	7.835	10274	45	10011	46	1266484
21	21	22	AlexaAntiMouseAb~N/A	HA20421~B21R22C21	6310	39520	110	10304	8562	3829	44	36	36	41	18	43	100	100	0	3144	2473	1142	46	203	203	202	13	6	100	100	0	3.491	3.756	3.693	4.349	2.314	3.861	0.882	101	494	86	13209	10796	1.804	10268	2941	8526	2270	864793
21	8	9	Hs~Ref:NM_023935.1~uORF:IOH4217~RFU:14644.56	HA20421~B21R09C08	3700	36920	140	10298	9959	3193	32	65	65	175	287	164	100	100	0	2595	2397	585	24	216	216	347	236	68	100	98	0	4.301	4.536	4.655	4.537	1.489	5.2	0.84	157	525	81	12612	12075	2.105	10233	2379	9894	2181	1563504
8	20	19	Hs~Ref:NM_139355.1~uORF:IOH4506~RFU:27064.89	HA20421~B08R19C20	19590	20870	140	10297	9930	3545	35	48	48	68	51	75	100	100	0	4109	3621	1267	34	159	159	169	29	17	99	97	0	2.595	2.854	2.9	3.271	2.618	3.017	0.856	146	591	95	14199	13344	1.376	10249	3950	9882	3462	1449838
10	2	16	Hs~Ref:NM_001039468.1~CAT:PV3878~RFU:15340.68	HA20421~B10R16C02	7020	24760	130	10296	10073	3199	31	40	40	42	12	28	100	100	0	2523	2173	753	34	166	166	167	12	7	100	100	0	4.351	4.999	5.117	5.735	2.034	5.167	0.884	122	538	90	12613	12040	2.121	10256	2357	10033	2007	1228846
34	3	16	Hs~Ref:NM_033439~CAT_PHC9255~RFU:126.8	HA20421~B34R16C03	7230	51820	130	10287	11382	8798	77	42	42	50	38	76	100	100	0	228	231	16	6	224	224	225	17	7	26	1	0	2561.25	1620	638.563	675.547	3.936	4379.5	0.009	134	529	84	10249	11347	11.323	10245	4	11340	7	1525241
4	13	16	Hs~Ref:NM_170775.1~uORF:IOH43500~RFU:11045.09	HA20421~B04R16C13	18200	15800	120	10284	9815	3891	39	46	46	51	20	39	100	100	0	2847	2633	933	35	158	158	158	12	7	100	100	0	3.807	3.947	3.908	4.093	1.766	4.182	0.901	128	438	94	12927	12244	1.929	10238	2689	9769	2475	1256266
6	22	22	AlexaAntiMouseAb~N/A	HA20421~B06R22C22	10950	21480	110	10281	9188	2773	30	43	43	46	17	36	100	100	0	2853	2379	962	40	168	168	167	10	5	100	100	0	3.813	4.136	3.925	4.819	1.875	4.061	0.915	96	558	88	12923	11356	1.931	10238	2685	9145	2211	882015
20	13	5	Hs~Ref:NM_006607.1~uORF:IOH40244~RFU:23869.55	HA20421~B20R05C13	18220	31600	120	10276	9651	3235	33	63	63	77	50	64	100	100	0	2590	2239	829	37	186	186	357	298	83	93	90	0	4.248	4.67	4.459	5.243	2.149	5.025	0.831	120	412	95	12617	11641	2.087	10213	2404	9588	2053	1158174
2	8	13	Hs~MGC:BC096708.1~uORF:IOH63336~RFU:18493.29	HA20421~B02R13C08	8180	15220	140	10273	9548	3623	37	47	47	55	31	56	100	100	0	3543	3122	1324	42	168	168	169	12	7	100	100	0	3.03	3.216	3.228	3.623	1.932	3.215	0.928	153	550	84	13601	12455	1.599	10226	3375	9501	2954	1460786
47	18	7	Hs~MGC:BC028040.1~uORF:IOH11532~RFU:16381.57	HA20421~B47R07C18	14810	63470	110	10268	9414	3114	33	44	44	107	566	528	100	98	0	3372	3164	676	21	184	184	190	43	22	100	98	0	3.207	3.144	3.143	3.008	1.59	3.514	0.852	80	374	100	13412	12350	1.681	10224	3188	9370	2980	753109
3	13	12	Hs~MGC:BC006318.1~uORF:IOH6433~RFU:27087.27	HA20421~B03R12C13	13700	15010	140	10266	9591	3781	39	54	54	75	68	90	100	100	0	6231	5849	1266	21	167	167	171	19	11	100	100	0	1.684	1.678	1.708	1.55	1.785	1.849	0.879	149	614	92	16276	15219	0.752	10212	6064	9537	5682	1429029
26	21	17	Hs~Ref:NM_001008723.1~uORF:IOH43999~RFU:6404.36	HA20421~B26R17C21	10840	43020	110	10245	10661	2732	25	66	66	730	1416	193	100	100	0	1348	1317	366	27	210	210	319	204	63	100	95	0	8.945	9.571	9.549	9.925	1.392	9.861	0.876	92	402	80	11317	11702	3.161	10179	1138	10595	1107	980813
9	22	6	Hs~MGC:BC040946.1~uORF:IOH26289~RFU:27055.78	HA20421~B09R06C22	6500	22770	120	10236	10353	3081	29	46	46	58	39	67	100	100	0	5351	4717	1444	30	166	166	171	15	8	100	100	0	1.965	2.265	2.19	2.359	1.526	2.33	0.893	142	533	89	15375	14858	0.975	10190	5185	10307	4551	1470100
43	12	5	Hs~MGC:NM_138730.1~uORF:IOH9857~RFU:6748.3	HA20421~B43R05C12	13620	58600	150	10236	9984	3127	31	63	63	425	1219	286	100	100	0	1090	860	359	41	228	228	306	181	59	77	72	0	11.802	15.698	14.638	21.898	2.434	17.318	0.567	172	564	83	11035	10553	3.561	10173	862	9921	632	1717187
31	10	3	Hs~Ref:NM_021079.2~uORF:IOH14141~RFU:27067.79	HA20421~B31R03C10	13150	44740	140	10233	8648	4229	48	48	48	73	71	97	100	100	0	2259	1773	841	47	217	217	220	21	9	99	98	0	4.988	5.527	5.613	6.649	2.201	5.673	0.892	166	591	93	12227	10156	2.318	10185	2042	8600	1556	1435505
22	18	8	Hs~Ref:NM_144664.3~uORF:IOH45592~RFU:12978.3	HA20421~B22R08C18	10200	36670	140	10232	8821	4653	52	45	45	60	50	83	100	100	0	3396	3143	1977	62	189	189	202	34	16	100	100	0	3.176	2.971	3.637	3.103	1.984	3.327	0.627	151	580	84	13394	11730	1.667	10187	3207	8776	2954	1331993
6	21	11	Hs~Ref:NM_005801.2~uORF:IOH6916~RFU:22099.18	HA20421~B06R11C21	10750	19280	140	10231	9675	4284	44	48	48	93	129	138	98	98	0	3082	2851	961	33	171	171	175	19	10	100	100	0	3.498	3.592	3.971	3.457	2.969	4.236	0.749	162	614	90	13094	12307	1.807	10183	2911	9627	2680	1567355
27	3	8	Hs~MGC:BC018736.1~uORF:IOH14106~RFU:16612.8	HA20421~B27R08C03	11700	41190	130	10226	8964	3701	41	40	40	47	24	51	100	100	0	1623	1432	504	35	196	196	200	29	14	99	97	0	7.138	7.22	7.232	7.618	1.816	7.577	0.907	128	509	89	11613	10160	2.836	10186	1427	8924	1236	1147414
1	2	22	ERa~N/A	HA20421~B01R22C02	2470	17040	130	10226	9727	3420	35	48	48	72	79	109	100	100	0	209	208	22	10	165	165	163	10	6	94	83	0	231.318	225.093	223.75	240.124	1.763	234.464	0.646	144	737	93	10222	9722	7.854	10178	44	9679	43	1400619
32	1	22	ERa~N/A	HA20421~B32R22C01	15870	48510	120	10224	10426	4446	42	40	40	79	144	182	100	100	0	255	273	85	31	210	210	211	13	6	95	87	0	226.311	164.857	229.274	205.601	2.394	251.866	0.148	124	658	95	10229	10449	7.822	10184	45	10386	63	1292763
2	20	22	ERa~N/A	HA20421~B02R22C20	10590	17020	120	10220	10497	3053	29	42	42	47	20	42	100	100	0	221	218	21	9	165	165	166	9	5	99	90	0	181.75	197.264	194.295	209.343	1.664	213.883	0.69	110	638	95	10234	10508	7.506	10178	56	10455	53	1154711
32	17	18	Hs~Ref:NM_016848.2~uORF:IOH11138~RFU:18724.36	HA20421~B32R18C17	19060	47710	200	10207	10572	4570	43	54	54	68	65	95	100	100	0	2464	3127	1317	42	192	192	198	60	30	100	100	0	4.469	3.584	3.533	3.611	1.441	3.772	0.869	317	692	74	12425	13453	2.16	10153	2272	10518	2935	3351265
48	5	12	Hs~Ref:NM_001014.2~uORF:IOH4063~RFU:23557.93	HA20421~B48R12C05	16710	64460	130	10202	9231	3204	34	96	96	137	136	99	100	100	0	2722	2591	644	24	286	286	463	377	81	97	94	0	4.149	3.963	4.311	3.958	2.124	5.263	0.576	141	482	87	12542	11440	2.053	10106	2436	9135	2305	1301542
12	8	13	Hs~Ref:NM_001001550.1~uORF:IOH13204~RFU:7811.29	HA20421~B12R13C08	17220	24190	130	10201	10327	4693	45	52	52	67	50	74	100	100	0	3733	3723	2086	56	180	180	246	207	84	96	96	0	2.856	2.9	3.131	3.134	2.004	3.188	0.668	133	411	94	13702	13818	1.514	10149	3553	10275	3543	1373551
18	2	22	ERa~N/A	HA20421~B18R22C02	6990	35010	130	10198	14544	13903	95	42	42	61	51	83	100	100	0	235	291	248	85	183	183	198	48	24	54	18	0	195.308	134.278	205.371	215.37	2.709	137.989	0.258	133	589	97	10208	14610	7.61	10156	52	14502	108	1934330
45	12	16	Hs~MGC:BC038241.1~uORF:IOH28735~RFU:3809.05	HA20421~B45R16C12	4570	65330	110	10187	11382	6350	55	66	66	88	82	93	100	100	0	2098	1908	684	35	196	196	306	229	74	98	92	0	5.321	6.61	6.658	6.377	1.682	8.324	0.785	99	410	96	12023	13028	2.412	10121	1902	11316	1712	1126863
7	2	14	Hs~Ref:NM_004493.1~uORF:IOH3421~RFU:20215.48	HA20421~B07R14C02	11490	19910	130	10185	8838	3364	38	40	40	47	26	55	100	100	0	2667	2240	873	38	170	170	171	11	6	100	100	0	4.063	4.25	4.052	4.841	1.909	4.345	0.911	137	520	94	12642	10868	2.023	10145	2497	8798	2070	1210740
25	5	3	Hs~Ref:NM_001207.2~uORF:IOH5823~RFU:9022.48	HA20421~B25R03C05	3110	40190	140	10181	9485	3715	39	50	50	109	132	121	100	100	0	4639	4068	1337	32	209	209	224	37	16	100	100	0	2.287	2.445	2.442	2.44	1.891	2.635	0.85	156	559	92	14561	13294	1.193	10131	4430	9435	3859	1479653
18	16	15	Hs~Ref:NM_006875.1~CAT:PV3649~RFU:24503.86	HA20421~B18R15C16	9780	33610	130	10180	9754	5420	55	38	38	41	10	24	100	100	0	6122	5242	1957	37	179	179	179	11	6	100	100	0	1.707	1.919	1.926	1.849	1.936	2.191	0.857	136	505	93	16085	14779	0.771	10142	5943	9716	5063	1326569
28	22	1	AlexaAntiMouseAb~N/A	HA20421~B28R01C22	20050	39790	110	10180	7842	4179	53	42	42	49	24	48	100	100	0	3734	3078	1188	38	176	176	177	14	7	100	100	0	2.849	2.688	2.891	2.4	3.197	3.064	0.842	94	541	93	13696	10702	1.511	10138	3558	7800	2902	737182
35	13	6	Hs~Ref:NM_002822.3~uORF:IOH40883~RFU:14451.77	HA20421~B35R06C13	13780	49820	180	10178	10464	4315	41	42	42	50	23	46	100	100	0	1288	1261	299	23	241	241	521	845	162	57	0	0	9.681	10.218	9.826	9.75	1.314	13.504	0.258	228	565	76	11183	11442	3.275	10136	1047	10422	1020	2385897
13	18	19	Hs~Ref:NM_001009880.1~uORF:IOH42078~RFU:27082.3	HA20421~B13R19C18	5700	29950	160	10177	10856	4750	43	38	38	48	29	60	100	100	0	3917	3780	1134	30	176	176	177	13	7	100	100	0	2.71	3.002	2.992	2.974	1.745	3.389	0.858	249	590	81	13880	14422	1.438	10139	3741	10818	3604	2703040
35	1	11	AlexaAntiMouseAb~N/A	HA20421~B35R11C01	11360	50800	120	10177	8873	3526	39	39	39	44	15	34	100	100	0	3976	3189	1467	46	215	215	219	25	11	99	97	0	2.696	2.97	2.887	3.641	2.511	2.976	0.889	108	600	89	13899	11808	1.431	10138	3761	8834	2974	958285
8	21	9	Hs~Ref:NM_004596.1~uORF:IOH6628~RFU:25624.9	HA20421~B08R09C21	19790	18870	130	10176	9562	4332	45	47	47	69	102	147	100	100	0	2396	1896	848	44	151	151	157	41	26	97	94	0	4.512	5.453	5.38	6.579	2.329	5.663	0.886	134	508	90	12374	11260	2.174	10129	2245	9515	1745	1281241
7	21	22	AlexaAntiMouseAb~N/A	HA20421~B07R22C21	15290	21510	110	10171	8631	3358	38	43	43	46	14	30	100	100	0	2826	2417	862	35	163	163	162	11	6	100	100	0	3.803	3.81	3.893	4.142	1.932	3.908	0.948	94	499	91	12791	10842	1.927	10128	2663	8588	2254	811277
13	5	6	Hs~Ref:NM_016355.3~uORF:IOH39973~RFU:18150.59	HA20421~B13R06C05	3110	27340	120	10171	9479	3402	35	57	57	81	78	96	100	100	0	2578	2192	835	38	192	192	237	115	48	95	92	0	4.239	4.711	4.727	5.53	2.704	5.019	0.838	121	478	91	12500	11422	2.084	10114	2386	9422	2000	1146937
40	12	20	Hs~MGC:BC017202.2~uORF:IOH57138~RFU:27061.99	HA20421~B40R20C12	18070	57100	130	10165	9457	3270	34	45	45	57	32	56	100	100	0	5140	4386	1529	34	237	237	288	145	50	95	95	0	2.064	2.268	2.168	2.53	2.476	2.373	0.847	141	509	81	15023	13561	1.045	10120	4903	9412	4149	1333375
5	14	19	Hs~MGC:BC010467.1~uORF:IOH11119~RFU:27062.41	HA20421~B05R19C14	4910	20920	130	10165	9465	3226	34	47	47	53	27	50	100	100	0	3321	3073	871	28	172	172	176	18	10	100	100	0	3.213	3.246	3.391	3.387	2.145	3.589	0.813	140	519	87	13267	12319	1.684	10118	3149	9418	2901	1325040
3	19	22	ERa~N/A	HA20421~B03R22C19	14900	17010	120	10160	9594	3061	31	41	41	44	16	36	100	100	0	197	203	38	18	161	161	162	11	6	87	73	0	281.083	227.452	262.633	282.619	2.202	271.457	0.329	118	617	92	10155	9595	8.135	10119	36	9553	42	1132038
17	3	1	ERa~N/A	HA20421~B17R01C03	2670	30810	130	10158	9923	3863	38	42	42	53	43	81	100	100	0	206	214	22	10	178	178	179	11	6	93	67	0	361.286	274.472	287.429	288.585	1.654	290.297	0.589	125	662	91	10144	9917	8.497	10116	28	9881	36	1240405
6	2	8	Hs~Ref:NM_003177.2~N/A~RFU:4749.71	HA20421~B06R08C02	6950	18680	130	10157	9846	5217	52	44	44	53	36	67	100	100	0	1643	1523	549	36	171	171	226	146	64	98	95	0	6.87	7.25	6.735	6.737	1.693	8.115	0.904	117	519	95	11585	11154	2.78	10113	1472	9802	1352	1151946
4	6	5	Hs~Ref:NM_007278.1~uORF:IOH41289~RFU:14558.26	HA20421~B04R05C06	16800	13610	140	10150	9811	3375	34	49	49	55	27	49	100	100	0	1715	1655	501	30	162	162	179	46	25	100	99	0	6.504	6.539	6.675	6.755	2.09	7.745	0.718	144	509	92	11654	11255	2.701	10101	1553	9762	1493	1412843
2	20	8	Hs~Ref:NM_130777.1~uORF:IOH13230~RFU:23272.83	HA20421~B02R08C20	10600	14210	130	10148	9814	3383	34	48	48	57	33	57	100	100	0	4356	3964	953	24	162	162	163	9	5	100	100	0	2.408	2.569	2.587	2.514	1.432	2.758	0.904	146	480	91	14294	13568	1.268	10100	4194	9766	3802	1432773
5	13	19	Hs~MGC:BC010467.1~uORF:IOH11119~RFU:27074.01	HA20421~B05R19C13	4710	20920	130	10147	9384	3695	39	47	47	54	29	53	100	100	0	2995	2917	833	28	168	168	169	10	5	100	100	0	3.573	3.397	3.523	3.335	2.106	3.835	0.825	145	500	91	12927	12086	1.837	10100	2827	9337	2749	1360673
44	8	13	Hs~Ref:NM_182597.1~uORF:IOH44503~RFU:11955.53	HA20421~B44R13C08	17280	60200	180	10132	9914	3285	33	49	49	86	117	136	100	100	0	1197	2221	1993	89	216	216	250	100	40	97	95	0	10.278	4.92	7.825	7.268	2.502	4.482	0.472	271	754	82	11064	11870	3.362	10083	981	9865	2005	2686729
24	20	3	Hs~Ref:NM_172160.1~uORF:IOH35727~RFU:27037.96	HA20421~B24R03C20	19630	35680	180	10129	9724	4498	46	69	69	272	648	238	100	100	0	7553	6153	2838	46	229	229	510	594	116	100	100	0	1.374	1.63	1.722	1.669	1.474	1.707	0.858	194	660	33	17384	15579	0.458	10060	7324	9655	5924	1886441
9	3	1	ERa~N/A	HA20421~B09R01C03	2700	21770	130	10123	9468	3237	34	41	41	47	26	55	100	100	0	216	210	21	10	161	161	162	10	6	94	82	0	183.309	192.388	181.08	208.842	1.655	220.946	0.686	125	640	92	10137	9476	7.518	10082	55	9427	49	1183490
41	13	20	Hs~MGC:BC000103.1~uORF:IOH4659~RFU:8291.44	HA20421~B41R20C13	4770	61620	140	10123	9425	3517	37	42	42	46	16	34	100	100	0	3556	3058	1205	39	191	191	191	11	5	100	100	0	2.996	3.273	3.357	3.979	2.574	3.42	0.851	152	608	85	13446	12250	1.583	10081	3365	9383	2867	1432614
12	7	16	Hs~Ref:NM_005416.1~uORF:IOH59847~RFU:27055.78	HA20421~B12R16C07	17020	24800	130	10120	11363	8398	73	52	52	77	86	111	98	95	0	7573	7247	1735	23	172	172	174	14	8	100	100	0	1.36	1.599	1.364	0.981	3.443	2.377	0.624	139	523	92	17469	18386	0.444	10068	7401	11311	7075	1579462
8	1	22	ERa~N/A	HA20421~B08R22C01	15780	21490	130	10115	9068	3884	42	44	44	56	58	103	100	100	0	191	190	18	9	160	160	161	10	6	85	71	0	324.871	300.8	292.104	285.194	2.003	1014.8	0.001	127	597	96	10102	9054	8.344	10071	31	9024	30	1151599
43	10	7	Hs~MGC:BC016790.1~uORF:IOH27885~RFU:26606.98	HA20421~B43R07C10	13220	59010	110	10109	10121	2208	21	67	67	609	1112	182	100	100	0	3661	3870	652	16	244	244	1090	1703	156	100	52	0	2.939	2.773	2.809	2.739	1.333	3.478	0.516	80	504	100	13459	13680	1.555	10042	3417	10054	3626	809675
9	16	16	Hs~MGC:BC059947.1~uORF:IOH39895~RFU:27081.05	HA20421~B09R16C16	5300	24780	140	10105	9721	4226	43	51	51	58	44	75	98	98	0	4052	3850	1530	39	173	173	176	29	16	99	98	0	2.592	2.63	2.96	2.512	3.6	3.156	0.643	146	550	91	13933	13347	1.374	10054	3879	9670	3677	1419266
36	7	20	Hs~Ref:NM_005517.2~uORF:IOH40568~RFU:18260.4	HA20421~B36R20C07	17070	52630	120	10104	10643	8006	75	47	47	70	116	165	100	100	0	1577	1404	464	33	232	232	251	54	21	98	95	0	7.477	9.041	8.137	8.421	2.359	13.878	0.628	123	500	85	11402	11768	2.903	10057	1345	10596	1172	1309036
3	3	19	Hs~MGC:BC009415.1~uORF:IOH14115~RFU:27079.4	HA20421~B03R19C03	11700	16410	140	10098	9750	3977	40	52	52	138	201	145	98	98	0	7578	7108	1450	20	169	169	240	134	55	100	100	0	1.356	1.398	1.404	1.238	1.916	1.582	0.84	164	501	93	17455	16637	0.439	10046	7409	9698	6939	1599081
4	15	6	Hs~MGC:BC022344.1~uORF:IOH14799~RFU:27047.9	HA20421~B04R06C15	18600	13800	140	10096	9826	3524	35	48	48	56	30	53	100	100	0	3793	3421	1023	29	154	154	158	40	25	100	98	0	2.761	2.993	2.997	3.18	2.137	3.262	0.844	173	460	95	13687	13045	1.465	10048	3639	9778	3267	1699889
21	15	2	Hs~Ref:NM_145010.1~uORF:IOH10871~RFU:27076.91	HA20421~B21R02C15	5090	35510	180	10093	10265	3334	32	42	42	132	371	281	100	100	0	3538	3486	3059	87	188	188	713	1555	218	60	52	0	3	3.1	3.925	4.578	2.309	2.819	0.45	230	663	75	13401	13521	1.585	10051	3350	10223	3298	2360893
29	12	5	Hs~MGC:BC050645.1~uORF:IOH27032~RFU:27079.4	HA20421~B29R05C12	4570	45090	120	10090	9346	2868	30	38	38	43	17	39	100	100	0	5857	5269	1486	28	224	224	226	19	8	100	100	0	1.784	1.845	1.883	1.841	1.487	1.887	0.933	126	506	95	15685	14353	0.836	10052	5633	9308	5045	1177544
36	14	4	Hs~MGC:BC025266.1~uORF:IOH23199~RFU:27072.77	HA20421~B36R04C14	18460	49420	120	10090	9007	3064	34	49	49	59	30	50	100	100	0	2750	2393	1117	46	221	221	359	448	124	87	80	0	3.97	4.124	3.766	5.489	2.762	4.135	0.825	119	424	86	12570	11130	1.989	10041	2529	8958	2172	1071816
27	10	8	Hs~Ref:NM_006790.1~uORF:IOH7249~RFU:26106.83	HA20421~B27R08C10	13100	41200	130	10089	9651	5139	53	39	39	44	15	34	100	100	0	2494	2180	1086	49	199	199	201	12	5	100	100	0	4.379	4.852	4.368	5.515	2.355	5.289	0.83	142	307	90	12345	11593	2.131	10050	2295	9612	1981	1370460
14	12	13	Hs~MGC:BC000552.1~uORF:IOH4161~RFU:23257.24	HA20421~B14R13C12	8990	28670	130	10067	9439	3839	40	50	50	90	100	111	100	100	0	7208	6054	2247	37	192	192	243	111	45	100	99	0	1.428	1.602	1.626	1.673	1.9	1.677	0.863	137	474	87	17033	15251	0.514	10017	7016	9389	5862	1293075
8	18	8	Hs~MGC:BC033677.1~uORF:IOH40219~RFU:13597.71	HA20421~B08R08C18	19190	18670	140	10058	9286	3195	34	42	42	49	23	46	100	100	0	1869	1692	575	33	154	154	155	12	7	100	99	0	5.84	6.01	5.935	6.679	1.82	6.231	0.902	134	622	92	11731	10782	2.546	10016	1715	9244	1538	1244355
10	14	3	Hs~Ref:XM_378350.2~uORF:IOH43457~RFU:27032.99	HA20421~B10R03C14	9420	22160	130	10045	10030	3667	36	59	59	143	193	134	98	98	0	10328	9671	2599	26	201	201	440	351	79	100	100	0	0.986	1.053	1.031	0.976	2.652	1.145	0.699	162	445	89	20113	19441	-0.02	9986	10127	9971	9470	1624849
48	22	17	Hs~MGC:BC000522.1~uORF:IOH3622~RFU:27107.58	HA20421~B48R17C22	20110	65450	110	10038	10239	1640	16	120	120	1328	1921	144	100	100	0	3297	3124	554	17	204	204	650	711	109	100	97	0	3.207	3.465	3.376	3.505	1.338	3.853	0.744	80	475	100	13011	13039	1.681	9918	3093	10119	2920	819115
19	11	7	Hs~MGC:BC000934.2~uORF:IOH2996~RFU:27035.47	HA20421~B19R07C11	13300	32000	140	10035	8246	3545	42	45	45	59	47	79	100	100	0	2754	2303	1118	48	189	189	189	12	6	99	99	0	3.895	3.879	3.939	4.526	2.738	4.045	0.813	151	399	92	12555	10315	1.962	9990	2565	8201	2114	1245109
43	4	9	Hs~Ref:NM_006153.3~uORF:IOH6521~RFU:25765.79	HA20421~B43R09C04	12020	59410	120	10020	9715	2494	25	71	71	177	243	137	100	100	0	5550	5306	852	16	247	247	673	700	104	100	100	0	1.876	1.906	1.916	1.873	1.376	2.249	0.824	118	385	90	15252	14703	0.908	9949	5303	9644	5059	1146401
29	20	18	Hs~Ref:NM_022156.3~uORF:IOH39856~RFU:27076.08	HA20421~B29R18C20	6160	47690	140	10019	10295	4301	41	58	58	147	240	163	100	100	0	3714	3133	1273	40	237	237	252	41	16	100	100	0	2.865	3.535	3.54	4.074	2.388	3.855	0.786	160	553	93	13438	13133	1.518	9961	3477	10237	2896	1647264
8	11	17	Hs~Ref:NM_001032293.1~uORF:IOH3584~RFU:27035.89	HA20421~B08R17C11	17790	20480	150	10014	8744	4973	56	44	44	68	92	135	99	99	0	3492	2635	1475	55	165	165	184	64	34	100	100	0	2.997	3.522	3.453	3.624	2.068	3.725	0.866	186	560	95	13297	11170	1.583	9970	3327	8700	2470	1626390
47	7	6	Hs~Ref:NM_017819.1~uORF:IOH45746~RFU:27060.33	HA20421~B47R06C07	12610	63290	130	10012	8542	3733	43	55	55	135	209	154	100	100	0	4733	4070	1657	40	208	208	238	66	27	100	97	0	2.2	2.198	2.177	2.296	2.143	2.326	0.854	135	516	93	14482	12349	1.138	9957	4525	8487	3862	1153232
5	4	1	ERa~N/A	HA20421~B05R01C04	2910	17310	130	9990	10140	3664	36	45	45	51	37	72	100	100	0	199	198	19	9	159	159	161	11	6	91	79	0	248.625	258.846	244.777	273.237	1.905	287.635	0.594	126	663	88	9985	10134	7.958	9945	40	10095	39	1277651
12	5	12	Hs~MGC:BC052805.1~uORF:IOH29378~RFU:27060.33	HA20421~B12R12C05	16620	23990	130	9988	9495	3003	31	42	42	45	16	35	100	100	0	4041	3497	1170	33	168	168	168	14	8	98	98	0	2.568	2.84	2.699	3.011	2.188	2.98	0.842	133	593	89	13819	12782	1.361	9946	3873	9453	3329	1262885
9	12	6	Hs~Ref:NM_014062.1~uORF:IOH39919~RFU:20101.11	HA20421~B09R06C12	4500	22780	120	9982	9137	4280	46	44	44	53	33	62	100	100	0	2714	2388	1075	45	173	173	174	12	6	100	100	0	3.911	4.105	4.1	4.677	2.2	4.232	0.915	128	493	95	12479	11308	1.968	9938	2541	9093	2215	1169499
41	13	2	Hs~MGC:BC029382.1~uORF:IOH23139~RFU:21911.74	HA20421~B41R02C13	4770	58010	140	9972	9722	3796	39	37	37	49	53	108	100	100	0	3481	2924	1369	46	215	215	219	25	11	99	97	0	3.042	3.575	3.874	4.459	2.376	3.66	0.829	149	657	93	13201	12394	1.605	9935	3266	9685	2709	1448550
45	2	6	Hs~Ref:NM_001381.2~uORF:IOH2343~RFU:9448.04	HA20421~B45R06C02	2560	63320	140	9966	9402	3462	36	50	50	128	195	152	100	100	0	5710	5159	1335	25	223	223	336	236	70	100	100	0	1.807	1.895	1.96	1.841	1.767	2.128	0.84	154	504	89	15403	14288	0.854	9916	5487	9352	4936	1447878
15	19	22	ERa~N/A	HA20421~B15R22C19	14890	30500	120	9963	9486	3546	37	43	43	47	20	42	100	100	0	218	219	22	10	174	174	175	10	5	92	88	0	225.455	209.844	213.714	223.296	1.779	249.871	0.527	113	610	89	9964	9488	7.817	9920	44	9443	45	1071906
47	11	8	Hs~MGC:BC036094.1~uORF:IOH27258~RFU:18022.13	HA20421~B47R08C11	13410	63680	130	9961	9365	2666	28	255	255	327	233	71	100	100	0	3682	3296	892	27	411	411	401	101	25	98	97	0	2.967	3.158	3.063	3.364	1.818	3.246	0.899	135	539	94	12977	11995	1.569	9706	3271	9110	2885	1264285
41	19	22	ERa~N/A	HA20421~B41R22C19	5970	62020	120	9956	9541	2503	26	48	48	63	49	77	100	100	0	237	237	30	12	189	189	188	12	6	85	73	0	206.417	197.771	210.24	248.388	2.18	197.495	0.635	119	614	92	9956	9541	7.689	9908	48	9493	48	1135420
18	3	13	Hs~MGC:BC029427.1~uORF:IOH23192~RFU:27075.25	HA20421~B18R13C03	7190	33220	140	9956	9506	3334	35	50	50	168	275	163	100	100	0	4331	3705	1290	34	186	186	192	36	18	100	98	0	2.39	2.687	2.646	3.051	2.224	2.778	0.855	155	546	96	14051	12975	1.257	9906	4145	9456	3519	1473467
16	7	7	Hs~MGC:BC001755.1~uORF:IOH4451~RFU:27032.16	HA20421~B16R07C07	17000	27470	130	9947	10305	4913	47	59	59	95	91	95	100	100	0	2658	4140	5707	137	202	202	218	47	21	98	98	0	4.026	2.602	4.195	3.837	3.117	2.313	0.186	152	474	90	12344	14184	2.009	9888	2456	10246	3938	1566353
6	20	22	ERa~N/A	HA20421~B06R22C20	10550	21480	120	9941	9748	3055	31	45	45	54	30	55	100	100	0	215	211	20	9	166	166	166	9	5	93	90	0	201.959	215.622	198.76	234.46	1.929	250.713	0.632	114	633	89	9945	9748	7.658	9896	49	9703	45	1111306
8	19	6	Hs~MGC:BC040020.2~uORF:IOH26263~RFU:23805.32	HA20421~B08R06C19	19390	18280	140	9940	9196	4497	48	47	47	80	114	142	100	100	0	3465	2707	1298	47	155	155	159	21	13	100	100	0	2.989	3.585	3.575	3.913	1.935	3.669	0.92	164	559	88	13203	11701	1.58	9893	3310	9149	2552	1508153
14	14	2	Hs~Ref:NM_022756.2~uORF:IOH13235~RFU:17385.74	HA20421~B14R02C14	9390	26460	160	9939	9013	4811	53	46	46	78	100	128	100	100	0	4394	3637	2575	70	179	179	200	72	36	97	87	0	2.347	2.593	3.057	3.869	2.854	2.548	0.742	193	664	90	14108	12425	1.231	9893	4215	8967	3458	1739443
38	3	1	ERa~N/A	HA20421~B38R01C03	7270	53300	130	9938	9627	2673	27	36	36	40	12	30	100	100	0	265	273	52	19	219	219	218	15	6	84	74	0	215.261	177.611	202.5	223.647	1.971	200.756	0.374	133	679	92	9948	9645	7.75	9902	46	9591	54	1280363
1	6	3	Hs~Ref:NM_000993.2~uORF:IOH14051~RFU:20479.03	HA20421~B01R03C06	3270	13230	140	9928	8688	3060	35	47	47	58	38	65	100	100	0	3422	2928	1126	38	161	161	162	11	6	100	100	0	3.03	3.123	3.236	3.612	2.457	3.276	0.833	146	560	87	13142	11408	1.599	9881	3261	8641	2767	1268450
24	22	15	Hs~Ref:NM_000222.1~CAT:PV4132~RFU:1289.42	HA20421~B24R15C22	20050	38090	120	9926	9413	3462	36	44	44	54	33	61	100	100	0	219	221	24	10	172	172	173	13	7	91	85	0	210.255	191.204	176.464	204.377	1.772	220.236	0.588	112	587	93	9929	9418	7.716	9882	47	9369	49	1054221
26	16	3	Hs~Ref:NM_018664.1~uORF:IOH44746~RFU:27050.39	HA20421~B26R03C16	9840	40220	140	9925	9698	3369	34	41	41	57	47	82	100	100	0	6271	5927	1272	21	200	200	227	96	42	100	100	0	1.628	1.686	1.65	1.623	1.646	1.838	0.857	160	447	92	15955	15384	0.703	9884	6071	9657	5727	1551714
13	21	5	Hs~Ref:NM_018956.2~uORF:IOH11209~RFU:26482.26	HA20421~B13R05C21	6300	27150	180	9920	9589	2717	28	45	45	137	377	275	100	100	0	3499	3574	902	25	176	176	245	237	96	98	98	0	2.972	2.809	2.799	2.88	1.633	3.01	0.854	279	611	89	13198	12942	1.571	9875	3323	9544	3398	2675385
16	20	22	ERa~N/A	HA20421~B16R22C20	19610	30470	110	9912	9769	3112	31	42	42	52	29	55	100	100	0	193	192	15	7	166	166	165	11	6	77	59	0	365.556	374.115	355.809	421.046	1.813	331.565	0.578	115	491	93	9897	9753	8.514	9870	27	9727	26	1123487
11	9	17	Hs~Ref:NM_012341.2~uORF:IOH26105~RFU:10233.68	HA20421~B11R17C09	12910	25020	130	9909	9304	3333	35	42	42	45	17	37	100	100	0	1696	1502	676	45	171	171	172	10	5	100	100	0	6.47	6.959	6.841	8.263	1.998	6.864	0.883	141	506	93	11392	10593	2.694	9867	1525	9262	1331	1311863
43	5	8	Hs~MGC:BC011885.1~uORF:IOH14206~RFU:8843.86	HA20421~B43R08C05	12220	59220	140	9909	8879	3361	37	51	51	252	573	227	100	100	0	1687	1777	679	38	230	230	610	977	160	93	8	0	6.766	5.707	6.795	5.569	1.76	8.685	0.276	161	554	91	11315	10375	2.758	9858	1457	8828	1547	1429565
3	21	22	AlexaAntiMouseAb~N/A	HA20421~B03R22C21	15300	17020	110	9902	8689	3328	38	41	41	46	15	32	100	100	0	2710	2316	859	37	160	160	160	11	6	99	99	0	3.867	4.011	4.03	4.401	2.61	4.273	0.852	103	515	79	12411	10804	1.951	9861	2550	8648	2156	894953
13	6	6	Hs~Ref:NM_016355.3~uORF:IOH39973~RFU:18247.56	HA20421~B13R06C06	3310	27340	130	9901	9288	3423	36	51	51	81	141	174	100	100	0	2633	2110	947	44	182	182	232	118	50	90	89	0	4.019	4.791	4.584	6.107	2.703	4.994	0.823	129	467	89	12301	11165	2.007	9850	2451	9237	1928	1198126
47	12	8	Hs~MGC:BC036094.1~uORF:IOH27258~RFU:17221.53	HA20421~B47R08C12	13620	63680	130	9900	9215	2556	27	153	153	215	182	84	100	100	0	3438	3073	845	27	362	362	353	106	30	100	100	0	3.169	3.343	3.211	3.49	1.593	3.369	0.901	139	507	97	12823	11773	1.664	9747	3076	9062	2711	1280910
34	7	13	Hs~Ref:NM_022749.4~uORF:IOH42659~RFU:6151.92	HA20421~B34R13C07	8030	51220	120	9899	10215	5223	51	42	42	53	33	62	100	100	0	1424	1372	551	40	233	233	232	12	5	100	100	0	8.276	8.932	9.758	9.416	1.954	9.865	0.845	118	504	89	11048	11312	3.049	9857	1191	10173	1139	1205393
30	22	16	Hs~MGC:BC018906.2~uORF:IOH57152~RFU:27088.51	HA20421~B30R16C22	11030	47300	130	9897	10600	7404	69	43	43	62	70	112	100	100	0	1209	1370	968	70	231	231	224	37	16	88	81	0	10.076	9.269	8.503	10.953	2.34	9.11	0.849	137	571	88	10832	11696	3.333	9854	978	10557	1139	1452254
42	12	6	Hs~MGC:BC000412.1~uORF:IOH3631~RFU:16562.66	HA20421~B42R06C12	9090	58820	130	9892	8755	4152	47	43	43	49	23	46	100	100	0	3093	2895	1472	50	203	203	203	10	4	100	100	0	3.408	3.236	3.107	3.734	2.215	3.416	0.805	127	500	91	12739	11404	1.769	9849	2890	8712	2692	1111826
23	14	8	Hs~MGC:BC014394.1~uORF:IOH22936~RFU:27000.25	HA20421~B23R08C14	13920	36700	130	9892	10617	4468	42	61	61	153	238	155	100	100	0	3538	3320	1314	39	223	223	278	127	45	100	98	0	2.966	3.408	3.43	3.565	1.922	3.927	0.711	130	469	89	13146	13653	1.568	9831	3315	10556	3097	1380180
7	1	14	Hs~Ref:NM_004493.1~uORF:IOH3421~RFU:20264.18	HA20421~B07R14C01	11280	19910	120	9891	9272	3406	36	42	42	51	40	78	100	100	0	2872	2408	834	34	168	168	168	10	5	100	100	0	3.642	4.121	4.187	4.339	1.76	4.325	0.888	123	563	89	12553	11470	1.865	9849	2704	9230	2240	1140477
15	12	13	Hs~MGC:BC028059.1~uORF:IOH59056~RFU:10973.58	HA20421~B15R13C12	13480	28700	140	9891	9040	3999	44	55	55	225	387	172	100	100	0	1791	1602	558	34	190	190	202	33	16	100	99	0	6.144	6.363	6.463	6.625	2.081	7.402	0.738	157	382	89	11437	10397	2.619	9836	1601	8985	1412	1419315
19	4	21	Hs~Ref:XM_379060.1~uORF:IOH44018~RFU:27047.07	HA20421~B19R21C04	11910	34820	180	9874	8561	6058	70	41	41	68	98	144	99	97	0	6552	4666	2996	64	186	186	232	129	55	95	95	0	1.545	1.902	1.924	1.745	2.42	2.062	0.859	217	847	94	16199	13000	0.627	9833	6366	8520	4480	1857634
48	2	5	Hs~Ref:NM_016073.2~uORF:IOH10649~RFU:10996.6	HA20421~B48R05C02	16100	63060	130	9873	9720	2332	23	265	265	539	612	113	100	100	0	1347	1268	311	24	217	217	608	946	155	84	0	0	8.503	8.996	8.979	9.975	2.072	10.211	0.484	142	495	96	10738	10506	3.088	9608	1130	9455	1051	1380190
40	6	21	Hs~Ref:NM_175913.3~uORF:IOH42350~RFU:8840.54	HA20421~B40R21C06	16870	57300	120	9871	9688	5842	60	39	39	44	15	34	100	100	0	2510	2437	1064	43	239	239	242	21	8	100	100	0	4.329	4.39	4.227	4.179	1.915	4.926	0.901	120	457	91	12103	11847	2.114	9832	2271	9649	2198	1162535
29	21	16	Hs~Ref:NM_003955.2~uORF:IOH29563~RFU:13571.6	HA20421~B29R16C21	6350	47320	180	9868	10578	5709	53	52	52	105	219	208	100	100	0	4257	5288	2781	52	232	232	240	64	26	100	100	0	2.439	2.082	2.095	2.107	1.584	2.191	0.842	267	625	90	13841	15582	1.286	9816	4025	10526	5056	2824201
6	21	22	AlexaAntiMouseAb~N/A	HA20421~B06R22C21	10750	21490	110	9864	8683	2928	33	49	49	56	28	50	100	100	0	2869	2466	889	36	168	168	167	9	5	100	100	0	3.634	3.757	3.702	4.075	2.06	3.864	0.892	99	532	90	12516	10932	1.861	9815	2701	8634	2298	859633
15	2	22	ERa~N/A	HA20421~B15R22C02	11480	30500	120	9860	9202	3012	32	42	42	50	23	46	100	100	0	209	210	21	10	177	177	177	11	6	82	73	0	306.813	277.576	267.12	300.26	2.008	308.849	0.489	115	626	91	9850	9193	8.261	9818	32	9160	33	1058230
2	2	8	Hs~MGC:BC071890.1~uORF:IOH63068~RFU:26558.93	HA20421~B02R08C02	6990	14210	130	9855	9265	3154	34	45	45	56	40	71	100	100	0	3165	2684	962	35	166	166	166	14	8	99	99	0	3.271	3.662	3.54	4.14	2.31	3.861	0.838	147	471	93	12809	11738	1.71	9810	2999	9220	2518	1361964
3	4	19	Hs~MGC:BC009415.1~uORF:IOH14115~RFU:27090.59	HA20421~B03R19C04	11890	16420	170	9854	8124	5481	67	43	43	90	165	183	100	99	0	7009	5228	3146	60	169	169	200	95	47	100	100	0	1.434	1.597	1.691	1.664	2.104	1.728	0.842	230	616	90	16651	13140	0.52	9811	6840	8081	5059	1868570
20	18	9	Hs~Ref:NM_013375.2~uORF:IOH1920~RFU:4062.58	HA20421~B20R09C18	19220	32390	150	9850	8753	4538	51	51	51	101	161	159	100	100	0	2285	1925	991	51	181	181	212	70	33	90	88	0	4.657	4.99	5.193	6.543	2.856	5.125	0.883	143	608	79	11903	10446	2.219	9799	2104	8702	1744	1251643
33	17	15	Hs~Ref:NM_014326.2~CAT:PV3614~RFU:765.48	HA20421~B33R15C17	5510	51590	110	9834	9626	2822	29	48	48	58	36	62	100	100	0	263	258	17	6	220	220	220	14	6	92	71	0	227.581	252.053	237.819	257.753	1.799	500.863	0.006	80	391	100	9829	9616	7.83	9786	43	9578	38	770092
16	19	22	ERa~N/A	HA20421~B16R22C19	19410	30470	110	9832	9363	2315	24	46	46	58	34	58	100	100	0	194	194	14	7	167	167	166	12	7	90	61	0	362.444	345.074	357.364	352.912	1.585	323.659	0.559	111	489	86	9813	9344	8.502	9786	27	9317	27	1039240
16	21	1	AlexaAntiMouseAb~N/A	HA20421~B16R01C21	19820	26260	100	9826	8810	4466	50	43	43	47	18	38	100	100	0	3707	3010	1491	49	158	158	159	15	9	100	100	0	2.757	3.074	3.196	3.627	2.666	3.245	0.86	90	476	90	13332	11619	1.463	9783	3549	8767	2852	792875
21	9	12	Hs~MGC:BC013171.1~uORF:IOH22121~RFU:25641.89	HA20421~B21R12C09	3910	37520	140	9817	8959	3038	33	41	41	51	30	58	100	100	0	3917	3427	1124	32	201	201	203	19	9	100	99	0	2.631	2.764	2.731	2.995	1.898	2.849	0.911	151	604	96	13492	12144	1.395	9776	3716	8918	3226	1352744
27	5	15	Hs~Ref:NM_003384.1~uORF:IOH41408~RFU:26911.57	HA20421~B27R15C05	12100	42600	120	9817	8830	4172	47	44	44	54	38	70	100	100	0	2342	1980	720	36	205	205	211	27	12	99	99	0	4.573	4.95	5.255	4.96	2.077	5.602	0.837	127	513	93	11910	10561	2.193	9773	2137	8786	1775	1121367
47	22	2	Hs~Ref:NM_003093.1~uORF:IOH41465~RFU:27052.88	HA20421~B47R02C22	15620	62480	150	9815	8497	5395	63	44	44	52	25	48	100	100	0	7782	5598	3422	61	191	191	210	69	32	98	98	0	1.287	1.563	1.647	1.693	3.02	1.621	0.88	186	739	80	17362	13860	0.364	9771	7591	8453	5407	1580428
10	21	22	AlexaAntiMouseAb~N/A	HA20421~B10R22C21	10820	25970	110	9813	8577	3250	37	39	39	44	15	34	100	100	0	3038	2675	865	32	174	174	174	9	5	100	100	0	3.413	3.414	3.528	3.476	1.722	3.594	0.907	92	538	88	12638	11039	1.771	9774	2864	8538	2501	789115
38	12	7	Hs~MGC:BC000044.1~uORF:IOH4604~RFU:17805.82	HA20421~B38R07C12	9060	54520	120	9813	9974	2234	22	77	77	367	530	144	100	100	0	1632	1572	267	16	247	247	361	245	67	100	97	0	7.03	7.469	7.421	7.541	1.398	8.704	0.727	117	431	93	11121	11222	2.813	9736	1385	9897	1325	1166978
28	2	8	Hs~Ref:NM_001002269.1~uORF:IOH59989~RFU:27044.17	HA20421~B28R08C02	16030	41200	110	9812	10231	2267	22	50	50	200	418	209	100	100	0	4317	4313	223	5	196	196	503	803	159	100	100	0	2.369	2.473	2.412	2.419	1.263	2.64	0.838	80	395	100	13883	14298	1.244	9762	4121	10181	4117	818502
8	20	6	Hs~MGC:BC040020.2~uORF:IOH26263~RFU:24424.83	HA20421~B08R06C20	19590	18280	140	9802	8667	3821	44	48	48	79	104	131	100	100	0	3553	2659	1391	52	148	148	154	22	14	100	99	0	2.865	3.432	3.256	4.239	2.269	3.382	0.89	157	514	90	13159	11130	1.518	9754	3405	8619	2511	1360657
45	1	22	ERa~N/A	HA20421~B45R22C01	2360	66520	120	9802	8946	3092	34	53	53	68	53	77	100	100	0	218	208	29	13	167	167	167	10	5	80	68	0	191.157	216.902	196.983	262.614	2.861	236.783	0.405	145	599	88	9800	8934	7.579	9749	51	8893	41	1297173
32	19	22	ERa~N/A	HA20421~B32R22C19	19470	48500	110	9796	9719	2124	21	108	108	217	257	118	100	100	0	242	244	14	5	204	204	293	240	81	0	0	0	254.947	240.275	258.675	247.85	1.456	-279.278	0.007	80	535	100	9726	9651	7.994	9688	38	9611	40	777495
13	4	1	ERa~N/A	HA20421~B13R01C04	2920	26320	120	9787	9393	3102	33	39	39	48	31	64	100	100	0	206	204	16	7	168	168	168	12	7	92	75	0	256.526	259.833	263.459	274.664	1.58	277.186	0.67	127	606	94	9786	9390	8.003	9748	38	9354	36	1192949
33	22	20	Hs~Ref:NM_016359.2~uORF:IOH45439~RFU:10561.32	HA20421~B33R20C22	6510	52590	120	9784	9351	3601	38	39	39	46	20	43	100	100	0	1385	1287	544	42	228	228	227	17	7	100	100	0	8.423	8.793	8.416	10.434	1.909	8.726	0.891	125	559	94	10902	10371	3.074	9745	1157	9312	1059	1168914
7	19	22	ERa~N/A	HA20421~B07R22C19	14890	21510	130	9779	9700	2904	29	42	42	50	26	52	100	100	0	218	331	485	146	166	166	169	37	21	75	27	0	187.25	58.533	189.95	160.179	3.687	108.398	0.012	123	707	90	9789	9823	7.549	9737	52	9658	165	1193066
6	2	22	ERa~N/A	HA20421~B06R22C02	6950	21480	120	9778	9032	2796	30	42	42	48	27	56	100	100	0	204	202	17	8	165	165	166	10	6	95	86	0	249.641	242.973	229.698	240.379	1.471	253.057	0.669	127	528	92	9775	9027	7.964	9736	39	8990	37	1147018
28	5	16	Hs~Ref:NM_002989.2~CAT_PHC1475~RFU:858.96	HA20421~B28R16C05	16640	42810	130	9777	8322	4473	53	39	39	53	52	98	100	100	0	227	227	28	12	185	185	186	13	6	80	70	0	231.857	197.214	213.308	215.552	2.307	220.523	0.602	141	499	77	9780	8325	7.857	9738	42	8283	42	1173424
17	13	12	Hs~Ref:NM_032338.2~uORF:IOH7537~RFU:9482.02	HA20421~B17R12C13	4680	33020	130	9776	9239	3160	34	38	38	45	22	48	100	100	0	1569	1471	569	38	181	181	183	21	11	98	96	0	7.016	7.133	6.969	8.04	2.002	7.209	0.885	132	549	88	11126	10491	2.811	9738	1388	9201	1290	1219564
6	19	22	ERa~N/A	HA20421~B06R22C19	10350	21480	120	9774	9826	3534	35	47	47	54	28	51	100	100	0	215	212	18	8	168	168	168	10	5	92	91	0	206.957	222.25	198.569	224.899	1.749	260.516	0.627	118	645	90	9774	9823	7.693	9727	47	9779	44	1159413
43	15	5	Hs~Ref:NM_032933.1~uORF:IOH6290~RFU:27067.38	HA20421~B43R05C15	14230	58610	150	9773	11849	9612	81	46	46	72	98	136	100	100	0	2815	3530	3624	102	208	208	212	19	8	100	99	0	3.731	3.553	5.989	7.458	3.621	4.239	0.435	202	439	37	12334	15125	1.9	9727	2607	11803	3322	2393407
37	1	22	ERa~N/A	HA20421~B37R22C01	2350	57520	140	9773	9862	6651	67	51	51	66	48	72	100	100	0	255	255	36	14	205	205	206	17	8	78	69	0	194.44	196.22	169.713	217.776	2.746	265.473	0.411	157	859	72	9772	9861	7.603	9722	50	9811	50	1548367
17	7	13	Hs~MGC:BC034488.2~uORF:IOH22312~RFU:27028.84	HA20421~B17R13C07	3460	33230	190	9772	9045	3419	37	40	40	45	16	35	100	100	0	2226	3125	4595	147	192	192	195	16	8	100	100	0	4.785	3.07	4.893	4.119	2.335	2.857	0.124	234	605	68	11766	11938	2.258	9732	2034	9005	2933	2116489
41	2	22	ERa~N/A	HA20421~B41R22C02	2570	62020	120	9770	9659	3045	31	47	47	63	65	103	100	100	0	267	267	22	8	210	210	210	14	6	97	90	0	170.579	168.632	170.865	176.344	1.643	199.501	0.639	125	593	95	9780	9669	7.414	9723	57	9612	57	1207432
19	11	2	Hs~Ref:NM_006658.1~uORF:IOH21548~RFU:27064.48	HA20421~B19R02C11	13300	31000	140	9768	9655	2993	30	45	45	60	43	71	100	100	0	4964	4465	1198	26	184	184	185	14	7	100	100	0	2.034	2.245	2.254	2.322	1.706	2.342	0.905	150	734	88	14503	13891	1.024	9723	4780	9610	4281	1448319
40	2	11	AlexaAntiMouseAb~N/A	HA20421~B40R11C02	16070	55290	110	9767	8617	3560	41	37	37	45	23	51	100	100	0	4056	3082	1623	52	228	228	231	17	7	100	100	0	2.542	3.006	2.828	3.788	2.873	2.991	0.83	104	466	93	13558	11434	1.346	9730	3828	8580	2854	896217
48	2	12	Hs~MGC:BC001088.1~uORF:IOH3839~RFU:17849.74	HA20421~B48R12C02	16110	64460	120	9761	8432	3675	43	46	46	52	20	38	100	100	0	2483	2410	1208	50	176	176	176	11	6	100	100	0	4.211	3.754	4.31	3.856	2.506	4.459	0.592	131	469	90	12022	10620	2.074	9715	2307	8386	2234	1104566
4	17	20	Hs~Ref:XM_378660.1~uORF:IOH44637~RFU:12707.73	HA20421~B04R20C17	19000	16600	140	9760	9060	3416	37	50	50	76	75	98	100	100	0	3229	2950	1057	35	161	161	164	15	9	100	100	0	3.165	3.231	3.437	3.432	2.078	3.45	0.849	162	588	90	12778	11799	1.662	9710	3068	9010	2789	1467797
41	17	15	Hs~Ref:NM_001004023.1~CAT:PV3837~RFU:17922.96	HA20421~B41R15C17	5570	60620	120	9757	8410	4360	51	45	45	55	72	130	100	100	0	3530	3204	1350	42	187	187	187	12	6	100	100	0	2.905	2.773	2.731	2.79	2.128	3.057	0.862	127	431	95	13055	11382	1.539	9712	3343	8365	3017	1068119
38	20	22	ERa~N/A	HA20421~B38R22C20	10650	57530	130	9749	8422	3362	39	41	41	50	36	72	100	100	0	250	243	23	9	203	203	203	11	5	87	75	0	206.553	209.525	201.275	221.562	2.081	228.583	0.572	125	663	95	9755	8421	7.69	9708	47	8381	40	1052753
15	1	22	ERa~N/A	HA20421~B15R22C01	11280	30500	120	9749	9560	2671	27	43	43	49	22	44	100	100	0	215	214	18	8	179	179	178	10	5	89	73	0	269.611	271.914	273.791	309.801	2.302	307.618	0.48	117	678	85	9742	9552	8.075	9706	36	9517	35	1118527
16	4	20	Hs~Ref:NM_015891.2~uORF:IOH44384~RFU:27087.27	HA20421~B16R20C04	16410	30090	130	9746	9262	3562	38	45	45	53	28	52	100	100	0	2132	1894	642	33	173	173	173	13	7	100	100	0	4.952	5.356	5.439	5.587	1.562	5.569	0.927	127	431	93	11660	10938	2.308	9701	1959	9217	1721	1176320
12	19	5	Hs~MGC:BC064984.1~uORF:IOH40665~RFU:21326.31	HA20421~B12R05C19	19410	22590	130	9736	8756	4252	48	49	49	69	87	126	100	100	0	3447	3065	1285	41	164	164	232	227	97	96	94	0	2.951	3.001	3.094	3.18	2.245	3.411	0.827	149	482	84	12970	11608	1.561	9687	3283	8707	2901	1304602
14	1	10	Hs~Ref:NM_004286.2~uORF:IOH14552~RFU:13160.33	HA20421~B14R10C01	6790	28070	140	9732	8930	4124	46	44	44	59	50	84	100	100	0	2758	2241	900	40	175	175	177	14	7	100	100	0	3.751	4.301	4.243	4.635	2.025	4.634	0.874	153	691	89	12271	10952	1.907	9688	2583	8886	2066	1366287
47	4	1	ERa~N/A	HA20421~B47R01C04	12020	62270	120	9730	8969	4090	45	41	41	50	31	62	100	100	0	225	227	24	10	186	186	187	13	6	87	73	0	248.436	217.756	198.303	224.606	2.107	251.498	0.536	131	601	87	9728	8969	7.957	9689	39	8928	41	1174951
37	2	22	ERa~N/A	HA20421~B37R22C02	2540	57520	130	9727	9325	3864	41	48	48	68	69	101	100	100	0	268	276	74	26	207	207	207	13	6	87	80	0	158.672	134.449	172.858	162.938	2.077	137.555	0.429	133	626	87	9740	9346	7.31	9679	61	9277	69	1240235
17	14	5	Hs~Ref:NM_032140.1~uORF:IOH6250~RFU:27036.71	HA20421~B17R05C14	4890	31610	140	9719	9864	3357	34	43	43	55	34	61	100	100	0	3594	3463	1682	48	199	199	326	211	64	99	95	0	2.85	3.009	3.143	3.363	1.889	3.249	0.694	144	509	89	13071	13085	1.511	9676	3395	9821	3264	1420448
31	5	4	Hs~Ref:NM_022839.2~uORF:IOH1783~RFU:15281.37	HA20421~B31R04C05	12140	44930	110	9718	9511	1398	14	44	44	85	158	185	100	100	0	2355	2324	315	13	214	214	230	59	25	100	100	0	4.518	4.487	4.489	4.491	1.238	5.175	0.824	80	353	100	11815	11577	2.176	9674	2141	9467	2110	760844
21	11	12	Hs~MGC:BC027465.1~uORF:IOH22829~RFU:27065.31	HA20421~B21R12C11	4310	37520	130	9714	9051	3675	40	42	42	48	25	52	100	100	0	6479	5446	2161	39	202	202	206	17	8	100	100	0	1.541	1.718	1.737	1.93	2.548	1.786	0.846	142	510	95	15949	14253	0.624	9672	6277	9009	5244	1285293
11	22	22	AlexaAntiMouseAb~N/A	HA20421~B11R22C22	15510	26010	110	9713	8314	2973	35	47	47	52	25	48	100	100	0	2960	2590	865	33	170	170	170	12	7	100	100	0	3.465	3.416	3.45	3.473	1.544	3.481	0.952	91	553	86	12456	10687	1.793	9666	2790	8267	2420	756565
29	10	10	Hs~Ref:NM_153694.3~uORF:IOH40756~RFU:27087.27	HA20421~B29R10C10	4170	46090	130	9706	8943	3797	42	38	38	42	13	30	100	100	0	3679	3396	1315	38	226	226	235	47	20	100	99	0	2.8	2.809	2.779	2.951	1.958	2.97	0.875	122	586	88	13121	12075	1.485	9668	3453	8905	3170	1091094
23	17	18	Hs~Ref:NM_198977.1~uORF:IOH57194~RFU:10906.68	HA20421~B23R18C17	14520	38710	120	9702	9289	4750	51	42	42	59	56	94	100	100	0	1664	1632	706	43	182	182	183	12	6	98	96	0	6.518	6.377	5.557	7.145	2.729	7.25	0.79	120	489	94	11142	10697	2.704	9660	1482	9247	1450	1114677
5	3	1	ERa~N/A	HA20421~B05R01C03	2710	17310	120	9701	9491	2889	30	46	46	59	48	81	100	100	0	203	206	32	15	160	160	161	10	6	87	79	0	224.535	205.326	233.393	249.906	2.034	206.035	0.59	131	587	88	9698	9491	7.811	9655	43	9445	46	1243369
35	15	7	Hs~Ref:NM_006756.2~uORF:IOH42106~RFU:27069.87	HA20421~B35R07C15	14170	50030	170	9700	9665	3083	31	41	41	57	83	145	100	100	0	2177	2085	541	25	232	232	237	22	9	100	100	0	4.966	5.194	5.275	5.24	1.578	6.158	0.653	212	253	56	11604	11477	2.312	9659	1945	9624	1853	2049050
8	4	1	ERa~N/A	HA20421~B08R01C04	16390	17270	120	9700	9606	3092	32	42	42	48	21	43	100	100	0	191	190	16	8	161	161	161	11	6	87	71	0	321.933	329.793	346.25	335.563	1.781	332.041	0.557	124	611	88	9688	9593	8.331	9658	30	9564	29	1191122
6	1	8	Hs~Ref:NM_003177.2~N/A~RFU:4632.44	HA20421~B06R08C01	6750	18680	130	9699	9287	4543	48	43	43	49	21	42	100	100	0	1650	1553	608	39	170	170	177	26	14	100	100	0	6.524	6.684	6.425	6.59	1.609	7.304	0.879	125	576	95	11136	10627	2.706	9656	1480	9244	1383	1160896
37	2	20	Hs~Ref:NM_004965.3~uORF:IOH4772~RFU:4275.1	HA20421~B37R20C02	2550	57130	140	9699	9090	4263	46	45	45	79	103	130	100	100	0	1165	1057	378	35	210	210	211	15	7	100	100	0	10.109	10.679	11.651	11.543	2.475	12.981	0.678	143	510	88	10609	9892	3.338	9654	955	9045	847	1299823
30	1	15	Hs~MGC:BC052806.1~uORF:IOH28971~RFU:5611.75	HA20421~B30R15C01	6830	47120	120	9696	9136	4999	54	43	43	45	12	26	100	100	0	931	879	373	42	226	226	227	13	5	97	97	0	13.692	13.925	13.682	15.781	2.389	14.579	0.896	115	580	92	10358	9746	3.775	9653	705	9093	653	1050596
45	20	22	ERa~N/A	HA20421~B45R22C20	6170	66530	120	9694	9179	2249	24	52	52	61	34	55	100	100	0	223	227	38	16	166	166	165	10	6	96	91	0	169.158	149.623	180.204	168.374	1.935	179.225	0.444	119	618	93	9699	9188	7.402	9642	57	9127	61	1092310
22	8	6	Hs~Ref:NM_019067.1~uORF:IOH13693~RFU:25205.95	HA20421~B22R06C08	8200	36280	140	9693	8655	3084	35	40	40	52	32	61	100	100	0	2060	1832	760	41	194	194	197	29	14	98	94	0	5.173	5.259	5.045	6.566	2.58	5.25	0.901	150	544	91	11519	10253	2.371	9653	1866	8615	1638	1298200
2	19	8	Hs~Ref:NM_130777.1~uORF:IOH13230~RFU:22829.02	HA20421~B02R08C19	10400	14210	140	9685	9109	3242	35	43	43	50	25	50	100	100	0	4294	3849	1124	29	164	164	167	17	10	100	100	0	2.335	2.46	2.409	2.492	1.576	2.599	0.907	154	510	89	13772	12751	1.223	9642	4130	9066	3685	1402808
41	16	17	Hs~MGC:BC034692.1~uORF:IOH22176~RFU:24424.16	HA20421~B41R17C16	5370	61020	150	9684	8083	4066	50	48	48	64	48	75	100	98	0	5437	4104	2116	51	191	191	214	79	36	98	97	0	1.837	2.053	1.958	2.192	3.096	2.151	0.833	187	550	92	14882	11948	0.877	9636	5246	8035	3913	1511481
44	15	5	Hs~Ref:NM_016167.3~uORF:IOH40609~RFU:19414.47	HA20421~B44R05C15	18710	58590	120	9683	8855	3783	42	47	47	64	54	84	100	100	0	1995	1836	806	43	222	222	224	18	8	98	98	0	5.435	5.457	5.381	6.26	2.326	5.647	0.861	118	441	89	11409	10422	2.442	9636	1773	8808	1614	1044896
42	12	3	Hs~Ref:NM_032141.1~uORF:IOH43707~RFU:27018.48	HA20421~B42R03C12	9090	58220	140	9682	9739	3244	33	84	84	318	638	200	100	100	0	3218	4919	5126	104	255	255	828	1599	193	87	38	0	3.239	2.07	3.243	3.025	2.756	1.594	0.293	154	451	90	12561	14319	1.696	9598	2963	9655	4664	1499743
13	22	15	Hs~N/A:NM_005228.3~CAT:PV4128~RFU:10862.75	HA20421~B13R15C22	6520	29140	120	9676	9604	4816	50	37	37	45	26	57	100	100	0	2186	2014	994	49	169	169	169	10	5	100	100	0	4.779	5.185	5.265	6.117	2.165	5.3	0.914	114	592	90	11656	11412	2.257	9639	2017	9567	1845	1094862
4	2	22	ERa~N/A	HA20421~B04R22C02	16000	17010	130	9675	8830	2890	32	44	44	48	18	37	100	100	0	192	192	17	8	163	163	164	11	6	84	61	0	332.103	302.966	299.507	331.307	1.947	342.188	0.474	139	645	92	9660	8815	8.375	9631	29	8786	29	1227369
44	17	6	Hs~MGC:BC029112.1~uORF:IOH22118~RFU:26238.99	HA20421~B44R06C17	19100	58790	130	9672	8996	4226	46	46	46	72	83	115	100	100	0	2271	1955	811	41	222	222	339	510	150	84	76	0	4.698	5.164	5.461	5.897	3.038	5.877	0.751	133	531	82	11675	10683	2.232	9626	2049	8950	1733	1196415
47	6	3	Hs~MGC:BC028039.1~uORF:IOH11511~RFU:27059.92	HA20421~B47R03C06	12420	62680	150	9660	8546	3985	46	41	41	81	163	201	100	100	0	7152	5790	2755	47	196	196	272	182	66	97	96	0	1.383	1.52	1.434	1.654	2.381	1.589	0.818	179	468	95	16575	14099	0.468	9619	6956	8505	5594	1529823
13	21	15	Hs~N/A:NM_005228.3~CAT:PV4128~RFU:10545.33	HA20421~B13R15C21	6320	29130	110	9658	8620	3499	40	38	38	47	30	63	100	100	0	2318	2179	891	40	171	171	170	10	5	100	100	0	4.481	4.274	4.301	4.568	1.794	4.451	0.878	104	479	90	11767	10590	2.164	9620	2147	8582	2008	896495
33	18	15	Hs~Ref:NM_014326.2~CAT:PV3614~RFU:800.41	HA20421~B33R15C18	5710	51590	110	9649	9713	2852	29	49	49	61	42	68	100	100	0	255	257	16	6	222	222	222	14	6	93	62	0	290.909	276.114	279.453	303.581	1.974	298.451	0.07	80	367	100	9633	9699	8.184	9600	33	9664	35	777045
23	11	17	Hs~Ref:NM_130807.1~uORF:IOH10112~RFU:27011.85	HA20421~B23R17C11	13330	38530	170	9643	9284	2890	31	39	39	77	307	398	100	100	0	8501	8313	1135	13	194	194	229	456	199	100	100	0	1.156	1.139	1.151	1.077	1.524	1.214	0.852	214	664	71	17911	17364	0.209	9604	8307	9245	8119	1986696
20	5	9	Hs~Ref:NM_016606.2~uORF:IOH40596~RFU:10027.55	HA20421~B20R09C05	16620	32400	120	9639	8848	3725	42	40	40	45	17	37	100	100	0	1747	1537	490	31	171	171	173	11	6	100	100	0	6.091	6.448	6.576	6.341	1.807	7.031	0.891	111	538	94	11175	10174	2.607	9599	1576	8808	1366	982121
2	1	8	Hs~MGC:BC071890.1~uORF:IOH63068~RFU:23466.77	HA20421~B02R08C01	6790	14220	140	9637	9561	3252	34	41	41	47	21	44	100	100	0	3061	2642	959	36	160	160	164	19	11	100	100	0	3.308	3.836	3.711	4.275	2.055	3.99	0.867	147	688	92	12497	12002	1.726	9596	2901	9520	2482	1405522
32	7	20	Hs~Ref:NM_021216.3~uORF:IOH57151~RFU:5612.46	HA20421~B32R20C07	17080	48110	120	9628	8855	4236	47	42	42	46	19	41	100	100	0	686	650	248	38	202	202	202	14	6	100	100	0	19.806	19.672	18.271	21.373	1.91	20.936	0.825	106	517	94	10070	9261	4.308	9586	484	8813	448	938578
40	2	5	Hs~MGC:BC010501.1~uORF:IOH10253~RFU:25065.89	HA20421~B40R05C02	16050	54090	170	9627	9031	3559	39	64	64	280	506	180	100	100	0	2588	2278	628	27	267	267	394	423	107	99	95	0	4.12	4.459	4.381	4.323	1.493	5.262	0.716	209	633	66	11884	10978	2.043	9563	2321	8967	2011	1887393
44	18	6	Hs~MGC:BC029112.1~uORF:IOH22118~RFU:24273.63	HA20421~B44R06C18	19310	58790	130	9626	9003	4753	52	53	53	81	68	83	100	100	0	2409	2101	858	40	230	230	394	563	142	84	80	0	4.393	4.784	4.936	4.795	3.166	5.973	0.631	132	545	90	11752	10821	2.135	9573	2179	8950	1871	1188379
1	2	13	Hs~MGC:BC023144.1~uORF:IOH10881~RFU:24461.71	HA20421~B01R13C02	2470	15240	140	9613	9322	2987	32	55	55	115	186	161	100	100	0	3577	3318	981	29	163	163	197	79	40	100	100	0	2.8	2.937	2.969	3.008	1.586	3.179	0.833	165	359	89	12972	12422	1.485	9558	3414	9267	3155	1538081
1	4	1	ERa~N/A	HA20421~B01R01C04	2880	12820	140	9612	9026	2674	29	49	49	64	70	109	100	100	0	199	200	16	8	168	168	168	11	6	89	72	0	308.484	280.531	269.643	294.912	1.678	286.148	0.624	147	784	91	9594	9009	8.269	9563	31	8977	32	1326757
6	7	17	Hs~MGC:BC032508.1~uORF:IOH62199~RFU:24781.33	HA20421~B06R17C07	7950	20480	140	9608	8252	3810	46	44	44	51	35	68	100	100	0	3557	2905	1261	43	171	171	171	10	5	100	100	0	2.825	3.002	3.115	3.623	3.086	3.228	0.834	142	560	89	12950	10942	1.498	9564	3386	8208	2734	1171848
4	3	6	Hs~Ref:NM_014508.2~uORF:IOH54737~RFU:12074.42	HA20421~B04R06C03	16200	13800	140	9604	9351	2945	31	48	48	57	28	49	100	100	0	2404	2305	689	29	165	165	244	156	63	96	94	0	4.268	4.347	4.343	4.777	2.319	4.819	0.812	152	502	93	11795	11443	2.094	9556	2239	9303	2140	1421382
12	11	16	Hs~Ref:NM_182770.1~uORF:IOH53444~RFU:27052.05	HA20421~B12R16C11	17820	24800	130	9598	9922	4986	50	51	51	67	70	104	100	100	0	3955	3337	1168	35	163	163	163	11	6	100	100	0	2.518	3.11	2.993	3.019	1.651	3.5	0.879	137	471	96	13339	13045	1.332	9547	3792	9871	3174	1359294
13	2	22	ERa~N/A	HA20421~B13R22C02	2510	30540	140	9597	8334	5510	66	45	45	57	51	89	100	100	0	218	241	119	49	178	178	178	11	6	90	71	0	238.8	131.571	202.445	156.729	2.489	168.195	0.163	160	731	49	9592	8352	7.9	9552	40	8289	63	1333393
37	10	17	Hs~MGC:BC010739.1~uORF:IOH9887~RFU:22716.58	HA20421~B37R17C10	4140	56530	140	9595	7735	4100	53	48	48	77	85	110	98	97	0	7029	5801	2442	42	254	254	375	261	69	100	100	0	1.409	1.386	1.436	1.23	3.009	1.596	0.717	161	526	86	16322	13234	0.495	9547	6775	7687	5547	1245384
40	4	18	Hs~MGC:BC071909.1~uORF:IOH63092~RFU:7771.42	HA20421~B40R18C04	16470	56690	120	9593	9310	3464	37	40	40	50	35	70	100	100	0	1159	1397	1256	89	234	234	240	37	15	99	99	0	10.328	7.971	8.802	9.851	2.138	8.157	0.423	115	503	90	10478	10433	3.368	9553	925	9270	1163	1070702
42	1	22	ERa~N/A	HA20421~B42R22C01	6880	62020	130	9590	8466	3895	46	42	42	62	68	109	100	100	0	221	223	21	9	184	184	185	14	7	87	75	0	258.054	216	222.291	206.025	1.943	264.401	0.546	139	665	95	9585	8463	8.012	9548	37	8424	39	1176780
36	12	13	Hs~MGC:BC031830.1~uORF:IOH25818~RFU:26661.69	HA20421~B36R13C12	18070	51230	120	9590	9015	3624	40	47	47	61	43	70	100	100	0	2839	2519	740	29	210	210	216	24	11	100	100	0	3.63	3.884	3.925	3.847	1.683	4.203	0.908	122	510	93	12172	11277	1.86	9543	2629	8968	2309	1099806
25	6	20	Hs~Ref:NM_032848.1~uORF:IOH13466~RFU:8132.77	HA20421~B25R20C06	3310	43590	130	9583	8985	3638	40	39	39	53	46	86	100	100	0	1265	1104	475	43	218	218	225	26	11	98	98	0	9.116	10.097	9.968	12.188	2.111	10.213	0.86	135	517	88	10591	9832	3.188	9544	1047	8946	886	1212932
33	3	20	Hs~Ref:NM_002031.1~N/A~RFU:7673.54	HA20421~B33R20C03	2710	52600	120	9581	9859	6106	61	41	41	44	12	27	100	100	0	3007	2807	935	33	215	215	216	14	6	100	100	0	3.417	3.788	3.833	3.14	2.024	4.7	0.846	131	482	93	12332	12410	1.773	9540	2792	9818	2592	1291473
43	9	7	Hs~MGC:BC016790.1~uORF:IOH27885~RFU:27050.8	HA20421~B43R07C09	13020	59030	150	9581	8706	5424	62	60	60	493	961	194	97	91	0	3416	3190	958	30	241	241	1051	1534	145	90	66	0	2.999	2.932	3.41	2.404	2.84	4.488	0.374	184	606	35	12696	11595	1.584	9521	3175	8646	2949	1601921
25	3	8	Hs~MGC:BC021930.1~uORF:IOH13703~RFU:27077.74	HA20421~B25R08C03	2700	41200	140	9563	9207	3083	33	72	72	127	139	109	100	100	0	3167	2818	1119	39	211	211	210	18	8	100	100	0	3.211	3.504	3.296	3.967	1.968	3.554	0.85	152	484	92	12447	11742	1.683	9491	2956	9135	2607	1399476
10	8	21	Hs~Ref:NM_205838.1~uORF:IOH50083~RFU:27079.81	HA20421~B10R21C08	8220	25770	130	9562	9231	2999	32	48	48	61	38	62	100	100	0	7006	6423	1718	26	185	185	189	20	10	100	100	0	1.395	1.472	1.419	1.482	1.797	1.525	0.899	143	520	92	16335	15421	0.48	9514	6821	9183	6238	1320092
9	11	6	Hs~Ref:NM_014062.1~uORF:IOH39919~RFU:21685.73	HA20421~B09R06C11	4300	22780	130	9558	9336	3488	37	43	43	54	39	72	100	100	0	2952	2531	1123	44	175	175	176	13	7	99	99	0	3.426	3.944	4.145	4.687	2.373	4.072	0.831	129	523	91	12292	11649	1.777	9515	2777	9293	2356	1204378
43	20	22	ERa~N/A	HA20421~B43R22C20	15230	62010	130	9555	9765	3558	36	44	44	64	60	93	100	100	0	229	227	18	7	188	188	187	13	6	90	80	0	231.976	249.256	254.69	275.194	2.006	262.955	0.599	135	673	86	9552	9760	7.858	9511	41	9721	39	1318337
48	5	5	Hs~Ref:NM_031299.2~uORF:IOH4043~RFU:17198.31	HA20421~B48R05C05	16710	63070	130	9552	9574	3059	31	82	82	221	353	159	100	100	0	2349	2160	650	30	226	226	256	117	45	100	95	0	4.461	4.908	4.751	5.247	1.917	5.478	0.732	141	504	96	11593	11426	2.157	9470	2123	9492	1934	1349934
10	4	4	Hs~Ref:NM_003278.1~uORF:IOH14450~RFU:21960.88	HA20421~B10R04C04	7420	22360	130	9546	8982	4036	44	40	40	46	22	47	100	100	0	3568	2989	1229	41	172	172	207	162	78	98	94	0	2.799	3.174	3.307	3.465	1.834	3.341	0.893	134	464	88	12902	11759	1.485	9506	3396	8942	2817	1203649
8	7	14	Hs~MGC:BC002448.2~uORF:IOH4300~RFU:27026.36	HA20421~B08R14C07	16990	19880	140	9545	9002	2777	30	46	46	57	36	63	100	100	0	4065	3645	1128	30	164	164	166	13	7	100	100	0	2.435	2.573	2.543	2.691	1.66	2.636	0.913	149	567	94	13400	12437	1.284	9499	3901	8956	3481	1341285
31	6	20	Hs~Ref:NM_033414.1~uORF:IOH10240~RFU:17981.52	HA20421~B31R20C06	12340	48140	120	9535	8881	3801	42	38	38	44	21	47	100	100	0	1602	1441	531	36	222	222	222	15	6	100	100	0	6.882	7.254	7.356	7.804	1.933	7.669	0.886	126	479	87	10877	10062	2.783	9497	1380	8843	1219	1119022
44	20	22	ERa~N/A	HA20421~B44R22C20	19700	62000	120	9535	8572	3429	40	46	46	71	85	119	100	100	0	226	223	22	9	190	190	190	12	6	79	69	0	263.583	258.364	220.557	265.957	2.274	258.533	0.56	121	599	86	9525	8559	8.042	9489	36	8526	33	1037153
26	19	17	Hs~Ref:NM_031845.1~uORF:IOH37776~RFU:27041.69	HA20421~B26R17C19	10430	43060	170	9534	10042	4009	39	87	87	265	433	163	100	100	0	2644	3477	3737	107	314	314	396	219	55	100	100	0	4.055	3.147	4.152	3.704	1.772	2.96	0.287	257	622	93	11777	13118	2.02	9447	2330	9955	3163	2580668
4	20	22	ERa~N/A	HA20421~B04R22C20	19610	17000	140	9531	9486	3227	34	45	45	51	25	49	100	100	0	181	184	38	20	147	147	147	10	6	72	60	0	279	255.162	238.511	284.577	2.273	240.496	0.469	150	774	94	9520	9478	8.124	9486	34	9441	37	1422832
23	14	19	Hs~Ref:NM_001655.3~uORF:IOH43520~RFU:15678.16	HA20421~B23R19C14	13920	38900	130	9529	9988	4674	46	38	38	44	23	52	100	100	0	2496	2265	947	41	181	181	181	11	6	100	100	0	4.1	4.774	4.647	5.145	1.817	5.054	0.898	126	511	87	11806	12034	2.036	9491	2315	9950	2084	1258474
18	6	19	Hs~MGC:BC067826.1~uORF:IOH61627~RFU:12922.71	HA20421~B18R19C06	7790	34410	140	9529	8902	3582	40	48	48	65	62	95	100	100	0	2616	2397	957	39	188	188	191	22	11	100	100	0	3.905	4.008	4.232	4.232	1.739	4.223	0.859	139	538	89	11909	11063	1.965	9481	2428	8854	2209	1237438
2	1	22	ERa~N/A	HA20421~B02R22C01	6790	17020	120	9525	8906	2822	31	49	49	64	40	62	100	100	0	196	194	18	9	167	167	168	13	7	75	57	0	326.759	328.037	279.361	367.793	2.083	323.036	0.508	124	625	89	9505	8884	8.352	9476	29	8857	27	1104378
38	4	7	Hs~Ref:NM_006337.3~uORF:IOH12378~RFU:13674.42	HA20421~B38R07C04	7440	54530	130	9524	8832	4505	51	42	42	52	38	73	100	100	0	1846	1658	877	52	219	219	220	17	7	94	93	0	5.828	6.108	6.354	7.332	2.163	6.026	0.918	134	557	94	11109	10229	2.543	9482	1627	8790	1439	1183454
44	11	7	Hs~Ref:NM_014445.2~uORF:IOH41298~RFU:26596.64	HA20421~B44R07C11	17910	58990	120	9522	8859	2876	32	79	79	123	122	99	100	100	0	7849	6851	2126	31	250	250	381	448	117	97	96	0	1.243	1.33	1.306	1.353	2.127	1.373	0.832	128	342	93	17042	15381	0.313	9443	7599	8780	6601	1133992
17	9	3	Hs~Ref:NM_002904.4~uORF:IOH14621~RFU:27083.13	HA20421~B17R03C09	3890	31220	140	9520	8563	3032	35	53	53	87	97	111	100	100	0	4043	3578	1444	40	190	190	193	16	8	100	100	0	2.457	2.512	2.567	2.854	2.141	2.583	0.827	161	584	94	13320	11898	1.297	9467	3853	8510	3388	1378642
41	22	7	Hs~MGC:BC011739.2~uORF:IOH14463~RFU:9450.98	HA20421~B41R07C22	6570	59020	160	9517	7935	4650	58	42	42	46	20	43	100	100	0	1688	1383	663	47	198	198	206	32	15	95	94	0	6.359	6.661	6.898	6.884	2.985	7.504	0.828	181	847	92	10965	9078	2.669	9475	1490	7893	1185	1436295
14	19	22	ERa~N/A	HA20421~B14R22C19	10400	30480	120	9511	9211	2665	28	39	39	45	22	48	100	100	0	224	229	33	14	176	176	176	10	5	95	84	0	197.333	173.057	205.88	205.842	1.877	185.473	0.57	114	629	96	9520	9225	7.624	9472	48	9172	53	1050020
25	5	20	Hs~Ref:NM_032848.1~uORF:IOH13466~RFU:7606.91	HA20421~B25R20C05	3110	43600	120	9510	8978	3120	34	44	44	56	45	80	100	100	0	1290	1176	453	38	215	215	219	22	10	97	96	0	8.806	9.297	9.114	10.626	2.044	9.45	0.855	131	501	92	10541	9895	3.138	9466	1075	8934	961	1176085
5	17	15	Hs~Ref:NM_001895.1~CAT:PV3248~RFU:1797.61	HA20421~B05R15C17	5500	20120	110	9502	9785	3629	37	42	42	48	22	45	100	100	0	368	363	77	21	166	166	213	99	46	86	54	0	46.832	49.457	47.896	53.942	1.973	61.383	0.546	106	423	86	9662	9940	5.549	9460	202	9743	197	1037198
48	8	6	Hs~Ref:NM_024591.1~uORF:IOH13020~RFU:26871.79	HA20421~B48R06C08	17310	63260	110	9499	10120	2302	22	199	199	765	1048	136	100	100	0	8977	8881	1445	16	1924	1924	1650	1214	73	100	100	0	1.319	1.426	1.375	1.425	1.356	1.294	0.779	101	454	91	16353	16878	0.399	9300	7053	9921	6957	1022127
12	22	8	Hs~MGC:BC011906.1~uORF:IOH12531~RFU:9765.04	HA20421~B12R08C22	20020	23200	140	9496	7709	4590	59	44	44	57	53	92	100	100	0	4199	3151	1794	56	158	158	167	40	23	100	100	0	2.339	2.561	2.7	2.691	1.801	2.687	0.894	188	653	88	13493	10658	1.226	9452	4041	7665	2993	1449367
40	11	5	Hs~Ref:NM_003600.1~N/A~RFU:10776.98	HA20421~B40R05C11	17850	54060	170	9496	9860	4696	47	51	51	101	241	238	100	100	0	598	924	511	55	247	247	269	158	58	92	51	0	26.909	14.489	15.857	18.829	2.034	13.869	0.715	269	559	84	9796	10486	4.75	9445	351	9809	677	2652236
44	1	11	AlexaAntiMouseAb~N/A	HA20421~B44R11C01	15910	59790	120	9490	7511	4183	55	50	50	66	57	86	100	100	0	4148	3263	1581	48	215	215	293	256	87	97	87	0	2.4	2.448	2.557	2.472	2.062	2.67	0.876	107	379	87	13373	10509	1.263	9440	3933	7461	3048	803718
18	15	15	Hs~Ref:NM_006875.1~CAT:PV3649~RFU:24364.15	HA20421~B18R15C15	9580	33610	120	9481	9056	4103	45	38	38	41	13	31	100	100	0	6640	5875	1829	31	179	179	180	11	6	100	100	0	1.462	1.583	1.618	1.529	2.014	1.752	0.838	127	499	93	15904	14714	0.547	9443	6461	9018	5696	1150093
17	13	5	Hs~Ref:NM_032140.1~uORF:IOH6250~RFU:27054.12	HA20421~B17R05C13	4690	31620	140	9480	9019	4294	47	57	57	67	41	61	100	100	0	3806	5169	6383	123	199	199	353	258	73	100	98	0	2.612	1.803	2.848	2.122	3.372	1.485	0.105	146	533	88	13030	13932	1.385	9423	3607	8962	4970	1316759
3	20	22	ERa~N/A	HA20421~B03R22C20	15100	17010	130	9477	8624	2702	31	41	41	47	19	40	100	100	0	217	215	20	9	162	162	162	12	7	96	86	0	171.564	161.943	160.407	165.715	1.798	188.903	0.54	128	687	92	9491	8636	7.423	9436	55	8583	53	1103901
40	20	8	Hs~MGC:BC006986.1~uORF:IOH7170~RFU:8459.31	HA20421~B40R08C20	19670	54690	120	9477	8288	4087	49	43	43	56	35	62	100	100	0	1050	966	380	39	209	209	209	15	7	97	97	0	11.218	10.892	10.813	11.525	2.169	11.692	0.855	127	478	93	10275	9002	3.488	9434	841	8245	757	1052530
33	22	22	AlexaAntiMouseAb~N/A	HA20421~B33R22C22	6520	52990	110	9468	7835	3207	40	40	40	54	48	88	100	100	0	3045	2570	1102	42	223	223	223	14	6	100	100	0	3.341	3.321	3.246	3.922	2.072	3.341	0.92	100	549	95	12250	10142	1.74	9428	2822	7795	2347	783510
26	5	4	Hs~Ref:NM_024093.1~uORF:IOH3089~RFU:22179.37	HA20421~B26R04C05	7640	40420	120	9468	9638	3291	34	44	44	58	52	89	100	100	0	2532	3178	2021	63	219	219	324	235	72	100	100	0	4.074	3.242	4.294	3.546	1.848	3.865	0.434	130	427	92	11737	12553	2.027	9424	2313	9594	2959	1252903
20	12	14	Hs~MGC:BC009458.1~uORF:IOH13468~RFU:9265.29	HA20421~B20R14C12	18020	33390	130	9459	9310	4202	45	51	51	88	103	117	100	100	0	2789	2694	1013	37	187	187	204	51	25	100	99	0	3.616	3.693	3.904	3.578	1.821	4.327	0.745	134	521	91	12010	11766	1.854	9408	2602	9259	2507	1247486
8	11	20	Hs~Ref:NM_001039724.1~uORF:IOH63165~RFU:6957.98	HA20421~B08R20C11	17790	21080	120	9455	8832	3243	36	42	42	45	15	33	100	100	0	3378	2923	983	33	163	163	165	15	9	100	100	0	2.928	3.185	3.095	3.401	2.015	3.442	0.844	128	508	92	12628	11550	1.55	9413	3215	8790	2760	1130540
11	19	22	ERa~N/A	HA20421~B11R22C19	14910	26010	120	9454	9218	2813	30	41	41	45	16	35	100	100	0	229	243	85	34	169	169	170	11	6	94	86	0	156.883	124.014	156.269	159.466	2.017	136.04	0.335	115	617	85	9473	9251	7.294	9413	60	9177	74	1060066
29	11	6	Hs~MGC:BC020726.1~uORF:IOH12969~RFU:20351.82	HA20421~B29R06C11	4360	45290	120	9451	9880	3648	36	37	37	42	13	30	100	100	0	2102	1927	839	43	225	225	223	12	5	100	99	0	5.015	5.783	5.784	6.408	2.05	6.337	0.72	133	465	94	11291	11545	2.326	9414	1877	9843	1702	1314092
35	20	20	Hs~Ref:NM_018051.2~uORF:IOH45784~RFU:4584.78	HA20421~B35R20C20	15160	52610	120	9449	9697	5789	59	46	46	78	87	111	100	100	0	619	583	215	36	239	239	267	68	25	83	74	0	24.745	28.055	27.527	28.693	1.741	29.002	0.904	118	521	91	9783	9995	4.629	9403	380	9651	344	1144187
8	18	14	Hs~MGC:NM_198395.1~uORF:IOH7337~RFU:17638.12	HA20421~B08R14C18	19190	19870	130	9448	9164	2999	32	42	42	47	17	36	100	100	0	1444	1271	415	32	157	157	157	12	7	99	99	0	7.308	8.189	7.506	9.302	2.446	8.986	0.787	130	547	92	10693	10236	2.87	9406	1287	9122	1114	1191323
23	8	16	Hs~MGC:BC094800.1~uORF:IOH62619~RFU:10047.23	HA20421~B23R16C08	12730	38330	180	9445	9110	4365	47	41	41	51	40	78	100	100	0	1911	1977	1371	69	188	188	268	529	197	92	67	0	5.458	5.069	5.89	5.584	2.261	6.161	0.44	283	623	92	11127	10858	2.448	9404	1723	9069	1789	2578080
19	1	22	ERa~N/A	HA20421~B19R22C01	11290	35020	120	9442	9312	2726	29	38	38	46	27	58	100	100	0	230	232	32	13	175	175	178	14	7	89	80	0	170.982	162.702	168.784	187.754	1.965	184.114	0.565	126	666	88	9459	9331	7.418	9404	55	9274	57	1173339
33	15	6	Hs~MGC:BC064367.1~uORF:IOH39904~RFU:13642.94	HA20421~B33R06C15	5110	49790	110	9441	9150	2103	22	41	41	99	235	237	100	100	0	2407	2354	162	6	221	221	224	23	10	100	100	0	4.3	4.271	4.383	4.157	1.244	4.671	0.875	80	319	100	11586	11242	2.104	9400	2186	9109	2133	731998
22	7	21	Hs~Ref:NM_015609.1~uORF:IOH23006~RFU:11330.74	HA20421~B22R21C07	8000	39300	150	9439	8664	4173	48	39	39	155	341	220	100	100	0	900	849	390	45	207	207	225	54	24	84	81	0	13.564	13.435	12.987	17.031	2.481	14.034	0.739	192	465	84	10093	9267	3.762	9400	693	8625	642	1663511
36	20	22	ERa~N/A	HA20421~B36R22C20	19670	53030	120	9439	8373	3494	41	46	46	57	38	66	100	100	0	264	256	28	10	206	206	206	16	7	82	70	0	161.948	166.54	156.321	179.256	2.01	182.789	0.615	125	612	89	9451	8377	7.339	9393	58	8327	50	1046637
10	22	3	Hs~MGC:BC009762.2~uORF:IOH14113~RFU:8875.35	HA20421~B10R03C22	11030	22170	130	9438	8532	4140	48	45	45	61	52	85	100	100	0	2645	2275	1089	47	169	169	200	83	41	98	93	0	3.794	4.03	4.053	4.478	2.042	4.24	0.871	150	591	94	11869	10593	1.924	9393	2476	8487	2106	1279781
2	10	3	Hs~Ref:NM_015607.2~uORF:IOH41553~RFU:6108.9	HA20421~B02R03C10	8600	13210	130	9435	9067	3874	42	45	45	66	66	100	100	100	0	1356	1252	592	47	165	165	165	10	6	100	100	0	7.884	8.3	8.313	9.916	1.921	8.191	0.906	132	542	93	10581	10109	2.979	9390	1191	9022	1087	1196834
24	1	22	ERa~N/A	HA20421~B24R22C01	15850	39490	130	9434	8329	3497	41	42	42	69	81	117	100	100	0	213	212	17	8	174	174	175	12	6	90	78	0	240.821	218.079	214.591	215.188	1.858	238.526	0.628	137	685	89	9431	8325	7.912	9392	39	8287	38	1141027
7	3	8	Hs~Ref:NM_014110.3~uORF:IOH39485~RFU:27039.2	HA20421~B07R08C03	11690	18710	150	9434	8702	3667	42	54	54	103	148	143	100	100	0	4702	4290	1466	34	178	178	183	24	13	100	100	0	2.073	2.103	2.184	2.156	1.867	2.219	0.905	161	523	90	13904	12760	1.052	9380	4524	8648	4112	1401038
9	4	1	ERa~N/A	HA20421~B09R01C04	2900	21760	120	9432	9094	2876	31	41	41	50	33	66	100	100	0	208	204	18	8	161	161	161	10	6	90	87	0	199.809	210.535	207.249	229.832	1.85	225.699	0.714	124	618	86	9438	9096	7.642	9391	47	9053	43	1127653
3	2	22	ERa~N/A	HA20421~B03R22C02	11500	17020	130	9431	9450	3605	38	46	46	61	52	85	100	100	0	211	212	28	13	167	167	168	16	9	87	67	0	213.295	208.978	226.704	226.753	1.9	272.156	0.293	140	669	90	9429	9449	7.737	9385	44	9404	45	1322983
37	21	22	AlexaAntiMouseAb~N/A	HA20421~B37R22C21	6350	57530	110	9425	8126	3090	38	41	41	45	13	28	100	100	0	3115	2661	976	36	208	208	208	16	7	100	100	0	3.228	3.296	3.404	3.65	2.214	3.429	0.896	93	516	93	12291	10538	1.691	9384	2907	8085	2453	755722
42	4	17	Hs~Ref:NM_004635.2~uORF:IOH3889~RFU:13612.93	HA20421~B42R17C04	7470	61030	160	9424	7488	4866	64	52	52	109	186	170	100	99	0	2668	2160	1338	61	194	194	217	77	35	97	95	0	3.788	3.782	3.678	3.996	1.942	3.977	0.879	232	718	55	11846	9402	1.922	9372	2474	7436	1966	1737143
16	3	1	ERa~N/A	HA20421~B16R01C03	16210	26270	120	9420	9003	3120	34	42	42	48	27	56	100	100	0	206	208	27	12	169	169	170	11	6	76	66	0	253.459	229.769	226.863	285.866	2.473	247.199	0.545	118	617	92	9415	9000	7.986	9378	37	8961	39	1062359
28	15	8	Hs~MGC:NM_153645.1~uORF:IOH11663~RFU:26991.96	HA20421~B28R08C15	18610	41180	190	9418	7067	5561	78	60	60	109	125	114	80	75	0	3375	2950	1168	39	221	221	249	168	67	96	94	0	2.967	2.568	3.368	1.022	10.816	4.536	0.416	210	698	5	12512	9736	1.569	9358	3154	7007	2729	1484023
5	1	22	ERa~N/A	HA20421~B05R22C01	2300	21520	130	9417	8788	3611	41	46	46	59	49	83	100	100	0	217	212	27	12	162	162	162	10	6	91	83	0	170.382	174.84	165.456	189.984	1.968	192.14	0.653	149	656	92	9426	8792	7.413	9371	55	8742	50	1309356
18	22	2	Hs~MGC:BC010074.2~uORF:IOH13694~RFU:10689.72	HA20421~B18R02C22	11000	31000	130	9415	8700	2840	32	46	46	54	28	51	100	100	0	2305	2072	556	26	186	186	207	100	48	99	99	0	4.421	4.589	4.652	4.697	1.738	4.928	0.869	140	610	83	11488	10540	2.145	9369	2119	8654	1886	1217999
7	16	3	Hs~Ref:NM_020467.2~uORF:IOH3994~RFU:12278.74	HA20421~B07R03C16	14290	17710	170	9413	8628	4557	52	42	42	98	208	212	100	100	0	2709	2003	1213	60	170	170	174	14	8	98	94	0	3.691	4.684	4.755	7.907	3.482	4.714	0.816	209	509	89	11910	10419	1.884	9371	2539	8586	1833	1803241
21	8	18	Hs~MGC:BC041366.2~uORF:IOH27747~RFU:25095.31	HA20421~B21R18C08	3710	38720	130	9412	9087	3403	37	42	42	52	34	65	100	100	0	4495	3991	1252	31	211	211	278	151	54	100	100	0	2.187	2.393	2.392	2.45	1.768	2.617	0.851	140	500	97	13654	12825	1.129	9370	4284	9045	3780	1272231
44	16	4	Hs~Ref:NM_016648.1~uORF:IOH41297~RFU:27078.57	HA20421~B44R04C16	18910	58400	120	9410	8673	3598	41	64	64	115	135	117	100	100	0	3926	3736	2414	64	230	230	289	189	65	96	94	0	2.529	2.456	2.709	2.839	3.27	2.619	0.514	133	474	74	13042	12115	1.338	9346	3696	8609	3506	1153458
38	2	15	Hs~MGC:BC011234.1~uORF:IOH10261~RFU:27073.6	HA20421~B38R15C02	7050	56140	150	9409	9084	4204	46	45	45	114	300	263	100	100	0	3606	3273	1546	47	212	212	228	61	26	100	100	0	2.759	2.953	3.346	3.151	2.009	3.335	0.696	177	469	88	12758	12100	1.464	9364	3394	9039	3061	1607856
45	2	14	Hs~MGC:BC012026.1~uORF:IOH10767~RFU:9646.28	HA20421~B45R14C02	2560	64920	120	9405	9003	4809	53	51	51	62	41	66	100	100	0	3274	3298	1552	47	248	248	254	58	22	97	96	0	3.091	2.935	2.922	3.239	3.086	3.181	0.847	126	453	84	12380	12002	1.628	9354	3026	8952	3050	1134334
41	20	22	ERa~N/A	HA20421~B41R22C20	6170	62010	130	9404	8601	4102	47	43	43	62	66	106	100	100	0	238	233	39	16	188	188	188	12	6	78	71	0	187.22	190.178	184.984	199.917	2.12	213.208	0.47	139	649	91	9411	8603	7.549	9361	50	8558	45	1195473
22	17	20	Hs~Ref:NM_199247.1~uORF:IOH43177~RFU:8766.17	HA20421~B22R20C17	10000	39110	190	9402	9008	5478	60	42	42	53	42	79	100	100	0	942	937	512	54	196	196	199	21	10	100	99	0	12.547	12.1	12.341	13.61	1.81	12.727	0.822	254	777	74	10106	9707	3.649	9360	746	8966	741	2288087
18	11	4	Hs~Ref:NM_016304.2~uORF:IOH7552~RFU:14945.72	HA20421~B18R04C11	8800	31420	140	9398	8561	3687	43	44	44	55	41	74	100	100	0	3091	2624	1266	48	201	201	213	98	46	94	90	0	3.237	3.515	3.464	4.554	2.932	3.576	0.861	150	533	89	12244	10940	1.695	9354	2890	8517	2423	1284181
20	14	18	Hs~MGC:BC015505.1~uORF:IOH9981~RFU:24178.68	HA20421~B20R18C14	18430	34180	150	9393	8621	4266	49	54	54	185	325	175	100	100	0	2353	1998	869	43	199	199	377	471	124	84	75	0	4.336	4.762	5.069	4.864	1.719	5.253	0.85	166	599	79	11493	10366	2.116	9339	2154	8567	1799	1431024
3	12	14	Hs~Ref:NM_017772.2~uORF:IOH42187~RFU:27077.74	HA20421~B03R14C12	13500	15420	140	9392	8760	3854	43	50	50	74	86	116	100	100	0	8891	7217	2936	40	167	167	172	19	11	100	99	0	1.071	1.235	1.253	1.367	2.027	1.254	0.91	157	578	86	18066	15760	0.099	9342	8724	8710	7050	1375390
8	17	14	Hs~MGC:NM_198395.1~uORF:IOH7337~RFU:18525.11	HA20421~B08R14C17	18990	19870	130	9391	8946	3818	42	46	46	50	18	36	100	100	0	1462	1351	310	22	156	156	156	11	7	100	100	0	7.155	7.448	7.774	7.111	1.57	8.671	0.834	128	530	96	10651	10095	2.839	9345	1306	8900	1195	1145032
21	12	2	Hs~Ref:NM_001006634.1~uORF:IOH44197~RFU:18518.72	HA20421~B21R02C12	4510	35510	150	9388	9052	4074	45	40	40	52	58	111	100	100	0	2101	1829	690	37	193	193	193	17	8	100	100	0	4.899	5.509	5.587	5.948	2.631	6.227	0.795	163	665	91	11256	10648	2.293	9348	1908	9012	1636	1475473
31	14	19	Hs~MGC:BC001304.1~uORF:IOH45994~RFU:27032.99	HA20421~B31R19C14	13960	47960	190	9387	10550	4989	47	61	61	334	831	248	100	100	0	1595	2159	1965	91	253	253	397	317	79	98	89	0	6.949	5.503	8.425	6.946	2.515	8.451	0.181	252	608	81	10668	12395	2.797	9326	1342	10489	1906	2658493
10	2	22	ERa~N/A	HA20421~B10R22C02	7010	25960	120	9383	9028	3734	41	42	42	51	31	60	100	100	0	216	295	288	97	173	173	174	14	8	88	75	0	217.233	73.656	220.469	168.004	2.982	98	0.077	135	556	92	9384	9108	7.763	9341	43	8986	122	1218790
4	4	6	Hs~Ref:NM_014508.2~uORF:IOH54737~RFU:11479.36	HA20421~B04R06C04	16400	13800	140	9381	9058	2862	31	45	45	55	29	52	100	100	0	2120	2012	646	32	167	167	222	130	58	96	96	0	4.78	4.885	5.027	5.422	2.283	5.421	0.796	153	471	91	11289	10858	2.257	9336	1953	9013	1845	1385941
41	4	1	ERa~N/A	HA20421~B41R01C04	2970	57800	120	9379	9188	2767	30	42	42	48	23	47	100	100	0	268	267	26	9	209	209	211	15	7	96	85	0	158.254	157.69	171.879	166.433	1.523	176.876	0.65	127	597	89	9396	9204	7.306	9337	59	9146	58	1166932
39	18	14	Hs~Ref:NM_002143.2~uORF:IOH4454~RFU:22505.53	HA20421~B39R14C18	14770	55910	130	9379	9871	5253	53	47	47	75	82	109	100	100	0	3945	3087	1507	48	229	229	233	29	12	97	91	0	2.511	3.437	3.306	4.796	4.029	3.995	0.711	149	491	94	13048	12682	1.328	9332	3716	9824	2858	1470835
14	11	13	Hs~MGC:BC000552.1~uORF:IOH4161~RFU:23478.13	HA20421~B14R13C11	8800	28670	130	9373	8887	2879	32	50	50	111	132	118	100	100	0	6928	5961	2164	36	197	197	257	130	50	100	100	0	1.385	1.533	1.478	1.666	1.757	1.545	0.866	136	477	94	16054	14601	0.47	9323	6731	8837	5764	1208636
1	20	22	ERa~N/A	HA20421~B01R22C20	6070	17030	130	9371	8716	3492	40	46	46	67	76	113	100	100	0	236	1116	3755	336	159	159	159	9	5	94	92	0	121.104	9.06	126.539	86.149	6.131	27.124	0.004	139	635	92	9402	9627	6.92	9325	77	8670	957	1211468
18	20	14	Hs~MGC:BC009851.1~uORF:IOH12351~RFU:20164.1	HA20421~B18R14C20	10590	33420	130	9370	8527	3223	37	46	46	87	116	133	100	100	0	3097	2783	940	33	186	186	193	36	18	100	98	0	3.203	3.266	3.461	3.548	2.093	3.522	0.842	149	479	93	12235	11078	1.679	9324	2911	8481	2597	1270546
5	6	6	Hs~MGC:BC063500.1~uORF:IOH39897~RFU:21773.99	HA20421~B05R06C06	3310	18320	130	9369	8841	3808	43	53	53	63	40	63	100	100	0	3640	3004	1161	38	172	172	185	37	20	99	98	0	2.686	3.103	3.125	3.407	1.912	3.242	0.925	139	473	92	12784	11620	1.426	9316	3468	8788	2832	1228899
24	20	4	Hs~Ref:NM_032943.2~uORF:IOH38478~RFU:7557.93	HA20421~B24R04C20	19620	35860	200	9363	9471	4567	48	72	72	477	967	202	100	99	0	1609	1231	679	55	202	202	358	418	116	62	59	0	6.603	9.134	9.413	11.618	1.868	9.242	0.72	213	897	10	10698	10428	2.723	9291	1407	9399	1029	2017429
6	3	1	ERa~N/A	HA20421~B06R01C03	7150	17270	130	9362	8726	2404	27	39	39	44	21	47	100	100	0	200	197	17	8	164	164	164	10	6	85	77	0	258.972	263.242	241.087	291.818	1.951	257.197	0.657	131	649	96	9359	8720	8.017	9323	36	8687	33	1143051
47	21	15	Hs~Ref:NM_001699.3~CAT:PV3971~RFU:1220.37	HA20421~B47R15C21	15440	65070	170	9359	8755	7579	86	47	47	53	24	45	98	97	0	251	3445	3892	112	169	169	290	479	165	43	43	0	113.561	2.658	137.061	6.4	103.125	-6.421	0.055	170	427	16	9394	11984	6.827	9312	82	8708	3276	1488317
29	16	17	Hs~Ref:NM_002013.2~uORF:IOH14109~RFU:23389.58	HA20421~B29R17C16	5360	47490	130	9357	9427	2524	26	52	52	111	176	158	100	100	0	2289	2060	560	27	221	221	240	65	27	100	97	0	4.5	5.098	4.576	5.537	2.019	5.593	0.8	136	506	86	11373	11214	2.17	9305	2068	9375	1839	1282024
40	18	7	Hs~Ref:NM_004217.1~N/A~RFU:24329.52	HA20421~B40R07C18	19270	54500	130	9356	9813	3831	39	59	59	207	325	157	100	100	0	3398	2925	954	32	238	238	318	160	50	100	96	0	2.942	3.63	3.621	3.718	1.649	3.872	0.896	131	526	96	12457	12441	1.557	9297	3160	9754	2687	1285469
9	21	22	AlexaAntiMouseAb~N/A	HA20421~B09R22C21	6290	25980	110	9355	8253	3600	43	43	43	46	16	34	100	100	0	2816	2256	997	44	171	171	171	10	5	100	100	0	3.521	3.938	3.872	4.419	2.434	4.127	0.859	93	517	78	11957	10295	1.816	9312	2645	8210	2085	767545
48	4	5	Hs~Ref:NM_021639.2~uORF:IOH10045~RFU:26974.56	HA20421~B48R05C04	16510	63060	130	9345	9286	2633	28	235	235	390	421	107	100	100	0	2769	2524	705	27	229	229	638	938	147	90	83	0	3.587	3.944	3.88	4.271	1.973	4.347	0.685	135	497	83	11650	11346	1.843	9110	2540	9051	2295	1253670
21	11	2	Hs~Ref:NM_001006634.1~uORF:IOH44197~RFU:20305.4	HA20421~B21R02C11	4310	35510	140	9323	8810	3314	37	46	46	70	83	118	100	100	0	2098	1841	606	32	196	196	200	21	10	100	100	0	4.877	5.328	5.366	5.602	1.788	5.67	0.888	156	652	94	11179	10409	2.286	9277	1902	8764	1645	1374387
23	5	15	Hs~MGC:BC060319.1~uORF:IOH29295~RFU:24367.23	HA20421~B23R15C05	12120	38110	140	9322	8314	4214	50	39	39	41	10	24	100	100	0	4191	3235	1720	53	190	190	189	12	6	96	95	0	2.32	2.718	2.781	3.978	3.8	2.75	0.893	145	459	92	13284	11320	1.214	9283	4001	8275	3045	1205472
8	1	5	Hs~Ref:NM_015833.1~uORF:IOH38242~RFU:10024.11	HA20421~B08R05C01	15790	18080	140	9322	8403	4260	50	45	45	55	34	61	100	100	0	2934	2635	803	30	164	164	167	15	8	100	100	0	3.349	3.382	3.432	2.975	2.441	4.053	0.814	174	643	93	12047	10829	1.744	9277	2770	8358	2471	1462055
29	12	6	Hs~MGC:BC020726.1~uORF:IOH12969~RFU:18773	HA20421~B29R06C12	4560	45290	120	9317	9458	3486	36	40	40	43	13	30	100	100	0	2141	1892	642	33	223	223	224	14	6	99	99	0	4.837	5.643	5.44	6.086	1.864	5.897	0.895	130	468	93	11195	11087	2.274	9277	1918	9418	1669	1229564
41	6	7	Hs~Ref:NM_004765.2~uORF:IOH14041~RFU:11362.92	HA20421~B41R07C06	3360	59010	140	9313	9326	3187	34	66	66	170	240	141	100	100	0	2956	2899	448	15	291	291	369	183	49	100	100	0	3.47	3.551	3.449	3.423	1.372	4.13	0.852	154	484	84	11912	11868	1.795	9247	2665	9260	2608	1436152
9	1	22	ERa~N/A	HA20421~B09R22C01	2290	25990	120	9312	9254	2791	30	43	43	66	64	96	100	100	0	201	202	22	10	171	171	173	14	8	77	50	0	308.967	297.129	292.128	321.933	2.032	338.782	0.413	131	637	91	9299	9242	8.271	9269	30	9211	31	1212264
12	6	12	Hs~MGC:BC052805.1~uORF:IOH29378~RFU:27050.39	HA20421~B12R12C06	16810	23990	130	9309	9142	3032	33	44	44	54	32	59	100	100	0	3994	3595	1146	31	170	170	172	14	8	100	100	0	2.423	2.656	2.768	2.776	1.68	2.77	0.881	137	554	92	13089	12523	1.277	9265	3824	9098	3425	1252482
45	10	12	Hs~MGC:BC033710.1~uORF:IOH21756~RFU:25053.38	HA20421~B45R12C10	4160	64530	130	9307	9476	3592	37	46	46	59	36	61	100	100	0	5417	4827	1681	34	199	199	204	23	11	100	100	0	1.775	2.038	2.06	2.139	2.111	2.191	0.808	147	438	96	14479	14058	0.828	9261	5218	9430	4628	1392945
17	2	22	ERa~N/A	HA20421~B17R22C02	2470	35020	140	9306	8156	3156	38	43	43	65	64	98	100	100	0	238	402	499	124	181	181	182	11	6	93	85	0	162.509	36.71	152.199	101.833	3.713	46.398	0.09	162	750	85	9320	8334	7.344	9263	57	8113	221	1321225
5	8	4	Hs~MGC:BC003608.1~uORF:IOH4641~RFU:27094.73	HA20421~B05R04C08	3710	17920	120	9303	9181	4025	43	41	41	50	36	72	100	100	0	6964	6034	2870	47	159	159	160	11	6	100	100	0	1.361	1.556	1.5	1.738	1.944	1.545	0.908	134	450	93	16067	15015	0.445	9262	6805	9140	5875	1230220
19	19	22	ERa~N/A	HA20421~B19R22C19	14900	35020	130	9301	8652	3181	36	38	38	42	12	28	100	100	0	232	254	74	29	178	178	178	12	6	90	84	0	171.537	113.342	156.293	143.531	1.974	111.603	0.53	133	681	86	9317	8690	7.422	9263	54	8614	76	1150730
48	21	17	Hs~MGC:BC000522.1~uORF:IOH3622~RFU:27090.17	HA20421~B48R17C21	19930	65450	120	9300	9299	1464	15	662	662	1418	1593	112	100	100	0	3354	4648	3726	80	361	361	717	729	101	100	98	0	2.886	2.015	2.882	2.405	1.806	1.813	0.347	91	604	72	11631	12924	1.529	8638	2993	8637	4287	846253
12	7	20	Hs~Ref:NM_052969.1~uORF:IOH12514~RFU:22906.48	HA20421~B12R20C07	17030	25580	150	9299	11525	6802	59	54	54	312	554	177	100	100	0	2772	3714	4628	124	174	174	177	17	9	100	100	0	3.559	3.24	4.702	4.1	2.851	4.553	0.139	175	508	84	11843	15011	1.831	9245	2598	11471	3540	2016841
42	17	3	Hs~Ref:XM_086879.4~uORF:IOH43381~RFU:25978.26	HA20421~B42R03C17	10100	58220	130	9298	9381	3374	35	41	41	48	22	45	100	100	0	4340	3880	1253	32	206	206	213	32	15	100	100	0	2.239	2.542	2.428	2.644	1.76	2.676	0.882	127	422	94	13391	13014	1.163	9257	4134	9340	3674	1191430
18	22	22	AlexaAntiMouseAb~N/A	HA20421~B18R22C22	10990	35010	110	9297	7782	3232	41	40	40	54	41	75	100	100	0	2865	2258	1119	49	179	179	181	16	8	99	99	0	3.446	3.724	3.541	5.054	2.855	3.682	0.894	102	541	85	11943	9821	1.785	9257	2686	7742	2079	793765
12	1	22	ERa~N/A	HA20421~B12R22C01	15820	25970	120	9295	9254	2546	27	41	41	49	31	63	100	100	0	201	199	17	8	169	169	182	43	23	14	0	0	289.188	307.1	311.563	330.562	2.043	810.15	0.015	126	652	95	9286	9243	8.176	9254	32	9213	30	1166055
29	22	22	AlexaAntiMouseAb~N/A	HA20421~B29R22C22	6560	48490	110	9291	8726	2242	25	39	39	47	27	57	100	100	0	3243	2675	1093	40	230	230	232	16	6	100	100	0	3.071	3.553	3.274	4.412	2.073	3.613	0.789	80	464	100	12265	11132	1.619	9252	3013	8687	2445	698096
29	21	22	AlexaAntiMouseAb~N/A	HA20421~B29R22C21	6360	48490	110	9290	8452	2395	28	45	45	51	37	72	100	100	0	3240	2742	997	36	231	231	234	17	7	100	100	0	3.072	3.348	3.262	3.749	1.579	3.493	0.817	80	393	100	12254	10918	1.619	9245	3009	8407	2511	676181
38	4	19	Hs~Ref:NM_006275.2~uORF:IOH3168~RFU:3090.47	HA20421~B38R19C04	7450	56930	140	9284	8599	4153	48	41	41	75	96	128	100	100	0	1130	1005	388	38	210	210	220	82	37	90	84	0	10.047	10.765	11.022	12.561	2.233	11.721	0.828	149	599	94	10163	9353	3.329	9243	920	8558	795	1281185
40	11	20	Hs~MGC:BC017202.2~uORF:IOH57138~RFU:27070.69	HA20421~B40R20C11	17870	57100	130	9282	8670	3392	39	43	43	53	35	66	100	100	0	5544	4523	1747	38	238	238	250	38	15	100	100	0	1.741	2.013	1.903	2.22	2.335	2.067	0.891	143	542	91	14545	12912	0.8	9239	5306	8627	4285	1239810
20	4	5	Hs~Ref:NM_205848.1~uORF:IOH43389~RFU:20654.32	HA20421~B20R05C04	16410	31590	120	9282	8321	3338	40	47	47	64	48	75	100	100	0	2255	2036	876	43	183	183	188	22	11	98	96	0	4.457	4.465	4.175	4.934	2.588	4.645	0.849	116	472	88	11307	10127	2.156	9235	2072	8274	1853	965266
21	22	22	AlexaAntiMouseAb~N/A	HA20421~B21R22C22	6510	39520	110	9278	7952	3077	38	36	36	39	11	28	100	100	0	3046	2488	1004	40	203	203	204	11	5	100	100	0	3.251	3.464	3.485	3.8	2.099	3.574	0.883	101	536	93	12085	10201	1.701	9242	2843	7916	2285	803154
26	19	22	ERa~N/A	HA20421~B26R22C19	10430	44020	130	9278	8594	3782	44	40	40	51	35	68	100	100	0	249	251	31	12	202	202	202	11	5	93	84	0	196.553	174.571	178.804	186.366	1.675	185.591	0.667	142	657	84	9285	8603	7.619	9238	47	8554	49	1220319
40	12	5	Hs~Ref:NM_003600.1~N/A~RFU:7817.84	HA20421~B40R05C12	18050	54080	180	9275	9347	4541	48	47	47	91	224	246	100	100	0	632	999	617	61	226	226	273	230	84	85	46	0	22.729	12.031	13.137	15.602	1.991	11.274	0.779	275	679	73	9634	10073	4.506	9228	406	9300	773	2570526
31	6	4	Hs~Ref:NM_022839.2~uORF:IOH1783~RFU:18089.26	HA20421~B31R04C06	12340	44930	110	9275	9233	1911	20	48	48	112	264	235	100	100	0	2167	2141	311	14	215	215	246	209	84	100	100	0	4.727	4.769	4.701	4.734	1.263	5.217	0.874	80	357	100	11179	11111	2.241	9227	1952	9185	1926	738601
8	7	8	Hs~Ref:NM_003146.2~uORF:IOH4845~RFU:8296.85	HA20421~B08R08C07	17000	18680	130	9274	9371	4125	44	68	68	151	183	121	100	100	0	4152	3692	1199	32	169	169	190	48	25	100	100	0	2.311	2.641	2.635	2.677	2.087	3.08	0.759	143	420	87	13189	12826	1.209	9206	3983	9303	3523	1340052
15	10	12	Hs~MGC:BC034718.1~uORF:IOH21418~RFU:9110.05	HA20421~B15R12C10	13080	28490	150	9271	8191	4936	60	44	44	86	124	144	100	100	0	2751	2135	1025	48	181	181	215	85	39	98	96	0	3.59	4.169	4.172	4.167	1.926	4.759	0.853	170	585	96	11797	10101	1.844	9227	2570	8147	1954	1392428
28	18	13	Hs~Ref:NM_006272.1~uORF:IOH4935~RFU:16969.55	HA20421~B28R13C18	19230	42190	170	9264	8776	4209	47	58	58	147	326	221	100	100	0	3453	2968	1009	33	203	203	269	195	72	99	99	0	2.833	3.153	3.079	2.966	1.528	3.591	0.854	222	536	88	12456	11483	1.502	9206	3250	8718	2765	1948226
24	9	15	Hs~Ref:NM_006298.2~uORF:IOH34757~RFU:23180.01	HA20421~B24R15C09	17440	38090	130	9264	9237	2525	27	204	204	855	1335	156	100	97	0	3925	3760	752	20	266	266	395	245	62	100	100	0	2.476	2.585	2.496	2.569	1.598	2.898	0.762	117	497	80	12719	12527	1.308	9060	3659	9033	3494	1080680
37	21	12	Hs~Ref:XM_085833.5~uORF:IOH43266~RFU:27088.51	HA20421~B37R12C21	6340	55520	160	9258	7960	5098	64	42	42	166	350	210	94	90	0	4708	4018	1557	38	216	216	331	296	89	100	100	0	2.052	2.083	2.112	1.533	2.889	2.709	0.46	184	511	59	13708	11720	1.037	9216	4492	7918	3802	1464717
45	2	22	ERa~N/A	HA20421~B45R22C02	2560	66530	130	9256	8661	2415	27	46	46	56	30	53	100	100	0	210	214	41	19	166	166	166	12	7	83	76	0	209.318	179.479	204.861	229.639	2.285	197.748	0.428	142	674	84	9254	8663	7.71	9210	44	8615	48	1229819
15	7	20	Hs~Ref:NM_015414.2~uORF:IOH4985~RFU:16622.23	HA20421~B15R20C07	12480	30100	130	9253	8860	3537	39	43	43	46	15	32	100	100	0	2667	2333	1036	44	182	182	182	11	6	100	100	0	3.706	4.099	4.019	4.704	1.913	4.084	0.925	127	545	88	11695	10968	1.89	9210	2485	8817	2151	1125235
16	16	9	Hs~Ref:NM_201998.1~uORF:IOH56887~RFU:27034.23	HA20421~B16R09C16	18810	27870	130	9250	9000	4203	46	40	40	51	30	58	100	100	0	1866	1582	575	36	165	165	166	12	7	100	100	0	5.414	6.323	6.002	6.689	2.439	7.177	0.827	144	425	82	10911	10377	2.437	9210	1701	8960	1417	1295997
14	22	4	Hs~Ref:NM_007368.2~uORF:IOH25931~RFU:11879.77	HA20421~B14R04C22	11000	26860	130	9250	8541	3235	37	48	48	71	83	116	100	100	0	3310	2967	840	28	183	183	235	108	45	100	98	0	2.943	3.051	3.161	3.072	1.679	3.397	0.866	134	564	91	12329	11277	1.557	9202	3127	8493	2784	1144529
31	14	14	Hs~MGC:BC013957.1~uORF:IOH13899~RFU:27001.08	HA20421~B31R14C14	13940	46930	120	9248	9772	4768	48	47	47	70	61	87	100	100	0	2581	2217	783	35	208	208	209	13	6	100	100	0	3.877	4.841	4.432	5.133	2.661	5.848	0.739	123	513	87	11574	11734	1.955	9201	2373	9725	2009	1202008
6	17	15	Hs~Ref:NM_053006.1~CAT:PV3622~RFU:1209.18	HA20421~B06R15C17	9950	20080	120	9242	8679	3663	42	42	42	48	30	62	100	100	0	197	198	23	11	167	167	167	8	4	86	68	0	306.667	278.613	301.889	334.093	1.898	268.74	0.646	110	513	93	9230	8668	8.261	9200	30	8637	31	954739
20	2	12	Hs~MGC:BC018137.1~uORF:IOH10369~RFU:7993.8	HA20421~B20R12C02	16040	32990	160	9237	8449	5154	61	51	51	89	121	135	100	100	0	4473	3268	1790	54	195	195	234	102	43	100	98	0	2.147	2.733	2.889	2.936	1.759	2.936	0.896	172	540	92	13464	11471	1.103	9186	4278	8398	3073	1453264
33	2	8	Hs~Ref:NM_005435.2~uORF:IOH14526~RFU:14459.59	HA20421~B33R08C02	2510	50190	110	9237	9539	2194	23	64	64	530	1253	236	100	100	0	4136	4251	325	7	258	258	823	815	99	100	100	0	2.365	2.373	2.352	2.311	1.272	2.927	0.768	80	530	100	13051	13468	1.242	9173	3878	9475	3993	763117
14	5	10	Hs~Ref:NM_020664.3~uORF:IOH9825~RFU:27083.54	HA20421~B14R10C05	7590	28070	140	9229	8938	3644	40	49	49	106	199	187	100	99	0	5096	4489	1469	32	171	171	172	13	7	100	100	0	1.864	2.059	2.007	2.134	2.196	2.239	0.836	153	560	92	14105	13207	0.898	9180	4925	8889	4318	1367564
42	21	12	Hs~MGC:BC103812.1~uORF:IOH63363~RFU:6914.45	HA20421~B42R12C21	10900	60020	140	9223	8605	3954	45	42	42	63	100	158	100	100	0	2278	1760	910	51	194	194	195	14	7	99	99	0	4.405	5.468	5.532	7.488	2.507	5.368	0.861	181	386	85	11265	10129	2.139	9181	2084	8563	1566	1557536
35	14	6	Hs~Ref:NM_002822.3~uORF:IOH40883~RFU:15222.53	HA20421~B35R06C14	13970	49820	180	9222	9666	3405	35	44	44	54	27	50	100	100	0	1477	2864	4039	141	240	240	529	886	167	58	24	0	7.42	3.667	9.376	6.275	3.099	4.194	0.093	237	501	78	10415	12246	2.891	9178	1237	9622	2624	2290744
13	3	10	Hs~MGC:BC062338.1~uORF:IOH40690~RFU:23927.15	HA20421~B13R10C03	2700	28140	170	9221	8244	4015	48	44	44	64	95	148	100	100	0	5417	4643	1543	33	181	181	183	29	15	100	100	0	1.753	1.838	1.734	1.686	1.471	2.164	0.829	211	362	59	14413	12662	0.81	9177	5236	8200	4462	1739550
8	3	1	ERa~N/A	HA20421~B08R01C03	16190	17270	120	9219	9251	2539	27	44	44	47	19	40	100	100	0	191	191	17	8	161	161	161	10	6	82	67	0	305.833	306.9	293.86	346.186	2.301	337.703	0.486	124	601	91	9205	9237	8.257	9175	30	9207	30	1147069
21	18	6	Hs~Ref:NM_006306.2~uORF:IOH44953~RFU:9536.71	HA20421~B21R06C18	5700	36310	130	9219	8806	3572	40	44	44	60	42	70	100	100	0	1172	1001	306	30	192	192	193	16	8	100	99	0	9.362	10.831	10.936	11.505	1.884	11.707	0.866	119	540	83	10155	9571	3.227	9175	980	8762	809	1047865
9	20	22	ERa~N/A	HA20421~B09R22C20	6100	25980	120	9217	9214	3742	40	43	43	50	31	62	100	100	0	214	214	29	13	172	172	171	10	5	91	81	0	218.429	218.357	221.933	238.645	1.714	218.964	0.677	113	615	89	9216	9213	7.771	9174	42	9171	42	1041235
41	22	22	AlexaAntiMouseAb~N/A	HA20421~B41R22C22	6570	62020	100	9213	7709	3104	40	40	40	46	19	41	100	100	0	3023	2624	982	37	189	189	189	11	5	100	100	0	3.237	3.149	3.132	3.273	2.336	3.414	0.824	89	492	88	12007	10104	1.695	9173	2834	7669	2435	686122
48	2	21	Hs~Ref:NM_020762.1~uORF:IOH29044~RFU:16239.85	HA20421~B48R21C02	16100	66250	160	9213	8296	3609	43	104	104	209	254	121	100	100	0	3545	3165	1115	35	209	209	1024	1704	166	86	45	0	2.731	2.771	2.864	2.639	1.49	3.419	0.513	201	721	23	12445	11148	1.449	9109	3336	8192	2956	1667419
10	11	6	Hs~MGC:BC000108.1~uORF:IOH4735~RFU:24707.86	HA20421~B10R06C11	8810	22770	130	9209	8575	3071	35	48	48	63	65	103	100	100	0	2992	2739	682	24	176	176	181	32	17	100	100	0	3.253	3.327	3.342	3.348	1.811	3.673	0.863	143	448	92	11977	11090	1.702	9161	2816	8527	2563	1226263
1	3	1	ERa~N/A	HA20421~B01R01C03	2680	12820	140	9203	9002	3115	34	45	45	55	37	67	100	100	0	211	334	600	179	166	166	166	11	6	94	86	0	203.511	53.315	217.231	169.162	3.023	73.608	0.032	155	750	92	9203	9125	7.669	9158	45	8957	168	1395271
42	3	17	Hs~Ref:NM_004635.2~uORF:IOH3889~RFU:12743.64	HA20421~B42R17C03	7280	61030	150	9201	8655	3637	42	55	55	152	238	156	100	100	0	3077	2594	1068	41	198	198	243	97	39	100	98	0	3.177	3.589	3.35	3.893	1.969	3.873	0.822	175	519	87	12025	10996	1.668	9146	2879	8600	2396	1514643
24	4	17	Hs~MGC:BC093990.1~uORF:IOH62017~RFU:21178.24	HA20421~B24R17C04	16430	38510	170	9200	8933	4128	46	41	41	52	39	75	100	100	0	1119	1107	497	44	183	183	188	37	19	100	100	0	9.785	9.623	9.735	10.098	1.426	9.742	0.894	235	496	84	10095	9816	3.291	9159	936	8892	924	2099233
19	20	22	ERa~N/A	HA20421~B19R22C20	15100	35030	130	9196	8564	3051	35	38	38	42	15	35	100	100	0	231	272	134	49	177	177	176	11	6	87	83	0	169.593	89.747	165.442	149.392	2.582	88.355	0.319	133	683	92	9212	8621	7.406	9158	54	8526	95	1139056
10	13	3	Hs~Ref:XM_378350.2~uORF:IOH43457~RFU:27040.44	HA20421~B10R03C13	9220	22170	140	9187	8567	2737	31	68	68	181	259	143	100	100	0	10085	9710	1583	16	200	200	431	356	82	100	100	0	0.923	0.894	0.92	0.841	1.645	0.956	0.842	154	491	91	19004	18009	-0.116	9119	9885	8499	9510	1319313
40	1	11	AlexaAntiMouseAb~N/A	HA20421~B40R11C01	15860	55300	110	9185	8039	3019	37	37	37	42	16	38	100	100	0	4036	3083	1413	45	228	228	231	20	8	100	98	0	2.402	2.803	2.759	3.345	2.499	2.813	0.857	94	525	90	12956	10857	1.264	9148	3808	8002	2855	755620
41	14	20	Hs~MGC:BC000103.1~uORF:IOH4659~RFU:11247.11	HA20421~B41R20C14	4970	61620	130	9185	9313	3326	35	43	43	51	27	52	100	100	0	3565	3067	1181	38	189	189	189	12	6	100	100	0	2.708	3.221	3.035	3.773	2.155	3.336	0.858	146	520	87	12518	12148	1.437	9142	3376	9270	2878	1359767
48	1	22	ERa~N/A	HA20421~B48R22C01	15900	66460	130	9184	8608	3226	37	52	52	98	133	135	100	100	0	206	202	22	10	168	168	174	63	36	4	0	0	240.316	251.647	224.714	260.035	2.137	251.125	0.545	138	705	89	9170	8590	7.909	9132	38	8556	34	1187881
48	7	6	Hs~Ref:NM_024591.1~uORF:IOH13020~RFU:26752.03	HA20421~B48R06C07	17110	63260	130	9181	9766	2121	21	241	241	1008	1276	126	100	100	0	8353	8324	1315	15	2263	2263	1955	1062	54	100	99	0	1.468	1.572	1.541	1.576	1.383	1.377	0.722	117	573	84	15030	15586	0.554	8940	6090	9525	6061	1142608
7	15	12	Hs~Ref:NM_022650.1~uORF:IOH41794~RFU:14145.72	HA20421~B07R12C15	14090	19510	120	9178	8974	2685	29	41	41	46	16	34	100	100	0	4003	3538	998	28	169	169	178	28	15	100	100	0	2.383	2.652	2.603	2.716	1.448	2.761	0.915	122	504	90	12971	12302	1.253	9137	3834	8933	3369	1094883
47	7	8	Hs~MGC:BC010876.1~uORF:IOH9862~RFU:7423.13	HA20421~B47R08C07	12610	63680	120	9175	9235	4152	44	48	48	54	31	57	100	100	0	1575	1456	566	38	185	185	186	13	6	100	98	0	6.566	7.228	7.582	7.811	2.204	7.86	0.84	117	515	89	10517	10458	2.715	9127	1390	9187	1271	1080450
15	22	22	AlexaAntiMouseAb~N/A	HA20421~B15R22C22	15480	30500	110	9172	8204	3117	37	42	42	44	14	31	100	100	0	2958	2502	865	34	176	176	177	13	7	100	100	0	3.282	3.509	3.551	3.544	1.559	3.601	0.949	91	552	90	11912	10488	1.714	9130	2782	8162	2326	746529
17	10	3	Hs~Ref:NM_002904.4~uORF:IOH14621~RFU:27066.97	HA20421~B17R03C10	4080	31220	140	9171	9646	3267	33	48	48	81	91	112	100	100	0	4025	3312	1426	43	193	193	203	48	23	98	96	0	2.381	3.077	2.826	3.899	2.686	3.215	0.767	159	567	90	12955	12717	1.251	9123	3832	9598	3119	1533708
8	12	9	Hs~Ref:NM_014972.1~uORF:IOH55892~RFU:16618.29	HA20421~B08R09C12	17990	18870	140	9171	8735	3483	39	56	56	87	90	103	100	100	0	3373	2772	1152	41	175	175	229	128	55	98	93	0	2.85	3.342	3.347	3.87	2.031	3.522	0.855	159	454	87	12313	11276	1.511	9115	3198	8679	2597	1388809
35	16	7	Hs~Ref:NM_006756.2~uORF:IOH42106~RFU:27072.77	HA20421~B35R07C16	14360	50030	160	9167	8929	2630	29	40	40	49	72	146	100	100	0	2187	2492	1792	71	229	229	233	23	9	100	100	0	4.661	3.928	4.951	4.289	1.75	4.661	0.317	216	329	80	11085	11152	2.221	9127	1958	8889	2263	1928636
33	20	4	Hs~Ref:NM_198517.2~uORF:IOH25922~RFU:22642.3	HA20421~B33R04C20	6090	49420	180	9167	9225	4512	48	42	42	51	39	76	100	100	0	3521	3323	834	25	260	260	350	215	61	98	98	0	2.798	2.998	2.994	2.822	1.904	3.651	0.794	261	700	87	12386	12246	1.485	9125	3261	9183	3063	2407680
32	16	17	Hs~MGC:BC010963.1~uORF:IOH13789~RFU:3285.78	HA20421~B32R17C16	18870	47500	110	9166	10792	5505	51	59	59	157	449	285	100	100	0	837	814	251	30	194	194	206	68	33	97	95	0	14.163	17.311	16.838	17.19	1.573	19.647	0.845	91	364	90	9750	11353	3.824	9107	643	10733	620	982083
10	19	22	ERa~N/A	HA20421~B10R22C19	10420	25970	120	9163	8683	2756	31	41	41	49	29	59	100	100	0	212	211	13	6	172	172	173	8	4	97	94	0	228.05	221.59	228.069	231.14	1.662	243.237	0.714	117	624	95	9162	8681	7.833	9122	40	8642	39	1015905
30	20	3	Hs~Ref:NM_201613.1~uORF:IOH45918~RFU:27070.28	HA20421~B30R03C20	10650	44710	160	9155	8001	4972	62	42	42	88	177	201	100	100	0	6095	4509	2718	60	226	226	290	163	56	99	97	0	1.553	1.858	1.856	1.936	1.847	1.938	0.873	206	547	81	14982	12242	0.635	9113	5869	7959	4283	1648194
18	7	19	Hs~MGC:BC093051.1~uORF:IOH63174~RFU:12345.16	HA20421~B18R19C07	7990	34420	130	9150	8527	3240	37	45	45	62	60	96	100	100	0	1926	1887	855	45	186	186	190	20	10	100	98	0	5.233	4.986	5.202	5.791	2.174	5.327	0.758	146	437	92	10845	10183	2.388	9105	1740	8482	1701	1244912
32	10	8	Hs~MGC:BC007957.1~uORF:IOH6766~RFU:26259.16	HA20421~B32R08C10	17650	45730	160	9143	8660	2550	29	56	56	1158	2621	226	100	88	0	2158	2275	918	40	215	215	851	1487	174	83	4	0	4.677	4.177	4.649	4.208	1.474	5.025	0.565	201	440	66	11030	10664	2.226	9087	1943	8604	2060	1740619
2	7	13	Hs~MGC:BC096708.1~uORF:IOH63336~RFU:18294.8	HA20421~B02R13C07	7980	15220	140	9142	8308	2913	35	46	46	55	33	60	100	100	0	3505	2994	1382	46	167	167	166	12	7	100	100	0	2.725	2.923	2.759	3.653	2.461	2.924	0.85	151	557	85	12434	11089	1.446	9096	3338	8262	2827	1254481
14	22	22	AlexaAntiMouseAb~N/A	HA20421~B14R22C22	10990	30480	110	9138	7984	2612	32	40	40	44	16	36	100	100	0	2932	2516	821	32	178	178	177	10	5	100	100	0	3.304	3.398	3.343	3.545	1.816	3.462	0.927	89	570	96	11852	10282	1.724	9098	2754	7944	2338	710577
10	22	22	AlexaAntiMouseAb~N/A	HA20421~B10R22C22	11020	25970	100	9135	8209	2542	30	42	42	48	22	45	100	100	0	2916	2642	814	30	174	174	173	10	5	100	100	0	3.316	3.309	3.279	3.482	1.884	3.457	0.871	87	507	86	11835	10635	1.73	9093	2742	8167	2468	714140
23	20	22	ERa~N/A	HA20421~B23R22C20	15120	39500	110	9128	8635	3818	44	40	40	47	24	51	100	100	0	235	239	34	14	183	183	183	11	6	91	81	0	174.769	153.482	146.214	170.782	2.26	186.974	0.544	102	529	90	9140	8651	7.449	9088	52	8595	56	880769
38	11	7	Hs~MGC:BC000044.1~uORF:IOH4604~RFU:16992.18	HA20421~B38R07C11	8860	54520	120	9128	9267	2127	22	176	176	474	585	123	100	100	0	1600	1916	1349	70	310	310	445	320	71	98	94	0	6.94	5.661	7.093	6.597	1.841	6.722	0.334	104	459	76	10242	10697	2.795	8952	1290	9091	1606	963753
6	4	21	Hs~MGC:BC018007.1~uORF:IOH13351~RFU:15429.23	HA20421~B06R21C04	7350	21280	110	9122	9242	1444	15	54	54	281	601	213	100	100	0	6308	6261	349	5	178	178	392	629	160	100	100	0	1.479	1.51	1.481	1.495	1.158	1.511	0.811	80	425	100	15198	15271	0.565	9068	6130	9188	6083	739389
35	22	16	Hs~MGC:BC012887.1~uORF:IOH25768~RFU:12171.81	HA20421~B35R16C22	15560	51800	140	9117	8007	3947	49	41	41	74	97	131	100	100	0	1187	975	484	49	221	221	222	13	5	98	95	0	9.395	10.565	10.787	14.614	2.728	10.691	0.821	156	686	92	10042	8720	3.232	9076	966	7966	754	1249159
26	15	17	Hs~Ref:NM_001412.2~uORF:IOH3055~RFU:8954.59	HA20421~B26R17C15	9620	43030	120	9117	8976	1982	22	75	75	701	1216	173	100	100	0	692	892	633	70	223	223	260	154	59	94	93	0	19.279	13.305	19.945	16.782	2.327	20.65	0.114	97	330	77	9511	9570	4.269	9042	469	8901	669	870649
47	17	7	Hs~MGC:BC028040.1~uORF:IOH11532~RFU:15098.21	HA20421~B47R07C17	14610	63470	110	9116	9056	3353	37	50	50	69	122	176	100	100	0	3398	3170	639	20	191	191	202	57	28	100	100	0	2.827	3.023	2.937	2.829	1.368	3.723	0.813	80	307	100	12273	11985	1.499	9066	3207	9006	2979	724506
43	2	22	ERa~N/A	HA20421~B43R22C02	11620	62010	130	9112	8663	3125	36	47	47	69	65	94	100	100	0	240	236	22	9	196	196	200	25	12	73	30	0	206.023	215.4	204.366	230.134	2.013	224.994	0.524	126	644	85	9109	8656	7.687	9065	44	8616	40	1091488
40	9	15	Hs~Ref:NM_017949.1~uORF:IOH29099~RFU:27072.77	HA20421~B40R15C09	17470	56100	120	9111	9470	2547	26	88	88	1263	2021	160	100	100	0	6924	6802	718	10	278	278	1306	1554	118	100	100	0	1.358	1.438	1.377	1.399	1.333	1.562	0.721	115	449	66	15669	15906	0.441	9023	6646	9382	6524	1089018
37	22	22	AlexaAntiMouseAb~N/A	HA20421~B37R22C22	6560	57530	110	9110	8242	2750	33	43	43	48	19	39	100	100	0	2977	2562	891	34	208	208	207	15	7	100	100	0	3.274	3.483	3.432	3.919	1.952	3.55	0.913	92	569	91	11836	10553	1.711	9067	2769	8199	2354	758286
4	20	16	Hs~Ref:NM_016101.3~uORF:IOH10163~RFU:24499.42	HA20421~B04R16C20	19600	15800	130	9108	8655	2416	27	52	52	55	21	38	100	100	0	6959	5985	2269	37	160	160	163	18	11	100	99	0	1.332	1.477	1.413	1.855	3.161	1.445	0.853	149	451	91	15855	14428	0.414	9056	6799	8603	5825	1289523
45	14	2	Hs~Ref:NM_018039.2~uORF:IOH43857~RFU:9174.95	HA20421~B45R02C14	4960	62520	120	9102	9301	3320	35	47	47	55	24	43	100	100	0	1648	1808	1359	75	183	183	184	12	6	100	100	0	6.181	5.695	6.667	7.65	2.369	5.749	0.558	124	566	91	10520	10879	2.628	9055	1465	9254	1625	1153364
5	2	22	ERa~N/A	HA20421~B05R22C02	2500	21530	120	9100	8942	3118	34	48	48	60	58	96	100	100	0	223	218	29	13	161	161	162	10	6	96	84	0	146	156.035	159.16	176.015	1.956	163.677	0.695	136	551	91	9114	8951	7.19	9052	62	8894	57	1216106
20	9	16	Hs~Ref:NM_175072.1~uORF:IOH59828~RFU:27030.5	HA20421~B20R16C09	17400	33840	160	9098	8349	3266	39	49	49	560	1552	277	98	95	0	7404	7498	1530	20	187	187	520	889	170	100	99	0	1.254	1.135	1.19	1.054	1.763	1.284	0.642	214	727	69	16266	15611	0.326	9049	7217	8300	7311	1786658
33	4	20	Hs~Ref:NM_002031.1~N/A~RFU:7617.45	HA20421~B33R20C04	2910	52600	120	9096	10006	5856	58	44	44	54	41	75	100	100	0	3198	2933	894	30	223	223	242	92	38	100	100	0	3.043	3.676	3.467	3.073	1.858	4.478	0.86	124	493	94	12027	12672	1.605	9052	2975	9962	2710	1240750
4	16	16	Hs~Ref:NM_014473.2~uORF:IOH9851~RFU:6980.77	HA20421~B04R16C16	18800	15810	140	9095	9162	3400	37	44	44	59	50	84	100	100	0	2712	2436	739	30	157	157	161	15	9	99	98	0	3.542	4.001	3.902	4.366	2.392	4.384	0.839	148	681	95	11606	11397	1.825	9051	2555	9118	2279	1355975
36	19	4	Hs~Ref:NM_178483.2~uORF:IOH43017~RFU:26702.3	HA20421~B36R04C19	19470	49420	120	9086	8515	2862	33	63	63	109	104	95	100	100	0	6509	6090	1516	24	358	358	757	655	86	100	99	0	1.467	1.475	1.546	1.418	1.868	1.701	0.754	128	407	95	15174	14184	0.553	9023	6151	8452	5732	1089945
9	8	4	Hs~MGC:BC024187.2~uORF:IOH10699~RFU:22302.75	HA20421~B09R04C08	3690	22380	120	9084	8416	3308	39	43	43	56	40	71	100	100	0	2195	2016	516	25	174	174	224	107	47	98	95	0	4.474	4.546	4.784	4.545	1.875	5.203	0.83	134	486	91	11062	10215	2.161	9041	2021	8373	1842	1127798
39	2	8	Hs~Ref:NM_005211.1~N/A~RFU:3304.96	HA20421~B39R08C02	11550	54720	120	9079	9175	4267	46	47	47	59	46	77	100	100	0	730	705	194	27	223	223	264	84	31	95	90	0	17.815	18.938	18.619	19.886	2.024	21.927	0.792	106	475	90	9539	9610	4.155	9032	507	9128	482	972587
14	2	22	ERa~N/A	HA20421~B14R22C02	6990	30480	120	9076	8652	2369	27	43	43	49	21	42	100	100	0	209	211	18	8	168	168	167	11	6	96	86	0	220.317	200.209	200.754	212.748	1.669	216.596	0.661	125	605	95	9074	8652	7.783	9033	41	8609	43	1081523
10	12	6	Hs~MGC:BC000108.1~uORF:IOH4735~RFU:24748.88	HA20421~B10R06C12	9010	22760	130	9072	8512	3347	39	45	45	54	36	66	100	100	0	2962	2744	647	23	177	177	178	13	7	100	100	0	3.241	3.298	3.342	3.151	1.616	3.698	0.869	148	452	87	11812	11034	1.697	9027	2785	8467	2567	1259785
30	16	2	Hs~MGC:NM_174942.1~uORF:IOH26291~RFU:13523.54	HA20421~B30R02C16	9840	44500	120	9068	8754	3977	45	39	39	50	49	98	99	99	0	1492	2704	3086	114	216	216	216	13	6	98	95	0	7.076	3.503	8.504	6.246	5.976	3.898	0.236	135	468	92	10305	11203	2.823	9029	1276	8715	2488	1181847
29	17	17	Hs~Ref:NM_024348.2~uORF:IOH3523~RFU:5787.87	HA20421~B29R17C17	5560	47490	90	9063	9292	3749	40	49	49	137	245	178	100	100	0	2693	2413	821	34	226	226	262	130	49	100	100	0	3.654	4.226	4.088	4.402	2.098	5.472	0.578	75	263	86	11481	11430	1.869	9014	2467	9243	2187	696895
14	2	10	Hs~Ref:NM_004286.2~uORF:IOH14552~RFU:24095.54	HA20421~B14R10C02	6990	28070	140	9059	9163	4490	49	40	40	54	49	90	100	100	0	2772	2356	832	35	176	176	178	12	6	100	100	0	3.474	4.185	4.287	4.167	1.827	4.706	0.861	148	571	92	11615	11303	1.797	9019	2596	9123	2180	1356065
21	21	9	Hs~MGC:BC005840.2~uORF:IOH46093~RFU:15780	HA20421~B21R09C21	6300	36920	130	9056	8387	3544	42	49	49	114	164	143	100	99	0	3736	3259	1166	35	226	226	562	601	106	96	87	0	2.566	2.749	2.65	2.774	1.931	3.108	0.825	154	572	94	12517	11371	1.36	9007	3510	8338	3033	1291584
45	3	1	ERa~N/A	HA20421~B45R01C03	2760	62320	120	9056	8434	3257	38	50	50	64	44	68	100	100	0	254	264	39	14	204	204	206	12	5	93	83	0	180.12	139.733	147.979	159.794	2.087	182.413	0.44	124	625	90	9056	8444	7.493	9006	50	8384	60	1045784
36	20	4	Hs~Ref:NM_178483.2~uORF:IOH43017~RFU:21481.28	HA20421~B36R04C20	19670	49420	140	9054	8173	3748	45	58	58	79	60	75	99	99	0	6895	6040	2150	35	219	219	493	648	131	99	99	0	1.348	1.394	1.426	1.24	2.29	1.57	0.843	150	548	94	15672	13936	0.43	8996	6676	8115	5821	1225941
12	5	4	Hs~MGC:BC000903.2~uORF:IOH2920~RFU:21710.53	HA20421~B12R04C05	16610	22390	140	9049	8330	3516	42	40	40	49	27	55	100	100	0	1883	1719	820	47	162	162	167	28	16	97	95	0	5.235	5.324	5.668	6.538	2.87	5.815	0.74	138	587	89	10730	9847	2.388	9009	1721	8290	1557	1149599
17	8	13	Hs~MGC:BC034488.2~uORF:IOH22312~RFU:26999.01	HA20421~B17R13C08	3660	33230	180	9046	8933	3741	41	40	40	47	26	55	100	100	0	2200	1979	611	30	197	197	203	36	17	100	100	0	4.496	4.99	5.269	4.889	1.581	5.735	0.828	251	511	63	11009	10675	2.169	9006	2003	8893	1782	2242224
24	9	14	Hs~Ref:NM_032377.2~uORF:IOH6191~RFU:8059.01	HA20421~B24R14C09	17440	37890	140	9043	9431	1783	18	266	266	1053	1468	139	100	100	0	1399	1374	269	19	222	222	354	215	60	100	100	0	7.457	7.956	7.851	8.071	1.372	8.882	0.771	136	427	78	9954	10317	2.899	8777	1177	9165	1152	1282670
33	19	22	ERa~N/A	HA20421~B33R22C19	5910	53000	120	9041	8487	3033	35	40	40	47	24	51	100	100	0	276	277	29	10	220	220	221	11	4	95	88	0	160.732	148.193	153.716	152.269	1.63	163.363	0.634	122	624	91	9057	8504	7.329	9001	56	8447	57	1035433
6	18	19	Hs~Ref:NM_144602.1~uORF:IOH11852~RFU:8289.41	HA20421~B06R19C18	10160	20870	130	9038	8441	3045	36	41	41	47	25	53	100	100	0	1505	1424	536	37	168	168	168	9	5	100	100	0	6.729	6.688	6.799	7.363	1.899	6.957	0.868	135	501	92	10334	9656	2.75	8997	1337	8400	1256	1139503
31	9	3	Hs~Ref:NM_021079.2~uORF:IOH14141~RFU:27064.48	HA20421~B31R03C09	12940	44730	140	9038	8985	4142	46	51	51	81	80	98	100	100	0	2234	2026	979	48	219	219	475	712	149	83	73	0	4.46	4.944	5.336	5.4	2.238	6.155	0.527	153	537	89	11002	10741	2.157	8987	2015	8934	1807	1374723
42	20	22	ERa~N/A	HA20421~B42R22C20	10700	62020	130	9035	8623	3954	45	48	48	70	69	98	100	100	0	243	263	127	48	189	189	188	13	6	83	71	0	166.426	115.878	175.483	170.62	2.59	128.785	0.2	141	643	95	9041	8649	7.379	8987	54	8575	74	1215854
3	8	5	Hs~Ref:NM_001022.3~uORF:IOH4572~RFU:25195.59	HA20421~B03R05C08	12690	13610	140	9034	8393	3315	39	47	47	63	53	84	100	100	0	4616	4240	1387	32	169	169	230	142	61	100	100	0	2.021	2.05	2.093	1.975	2.028	2.283	0.833	160	492	92	13434	12417	1.015	8987	4447	8346	4071	1342835
19	3	4	Hs~MGC:BC021105.1~uORF:IOH14081~RFU:27070.28	HA20421~B19R04C03	11700	31410	140	9033	7934	3611	45	43	43	48	19	39	100	100	0	5927	4885	2077	42	184	184	192	50	26	100	100	0	1.565	1.679	1.726	1.802	2.465	1.749	0.871	145	415	94	14733	12592	0.647	8990	5743	7891	4701	1150408
27	20	19	Hs~MGC:BC050563.1~uORF:IOH26951~RFU:27081.88	HA20421~B27R19C20	15110	43390	120	9026	8556	3273	38	37	37	42	14	33	100	100	0	4216	3660	1311	35	200	200	201	16	7	100	100	0	2.238	2.462	2.51	2.633	2.393	2.631	0.837	128	472	95	13005	11979	1.162	8989	4016	8519	3460	1095151
6	17	19	Hs~Ref:NM_144602.1~uORF:IOH11852~RFU:8244.24	HA20421~B06R19C17	9950	20880	130	9021	8606	3392	39	40	40	42	10	23	100	100	0	1556	1466	569	38	167	167	166	10	6	100	100	0	6.466	6.594	6.386	7.055	1.763	6.873	0.878	134	498	94	10370	9865	2.693	8981	1389	8566	1299	1153187
14	4	1	ERa~N/A	HA20421~B14R01C04	7390	26260	130	9021	8966	2828	31	40	40	43	14	32	100	100	0	209	211	14	6	170	170	170	10	5	100	94	0	230.282	217.707	240.131	219.638	1.536	258.401	0.617	126	679	92	9020	8967	7.847	8981	39	8926	41	1129694
18	4	13	Hs~MGC:BC029427.1~uORF:IOH23192~RFU:19941.57	HA20421~B18R13C04	7390	33220	140	9018	8036	3825	47	47	47	139	243	174	100	100	0	4308	3431	1726	50	182	182	185	16	8	99	99	0	2.174	2.459	2.416	3.21	2.376	2.46	0.88	174	518	92	13097	11238	1.121	8971	4126	7989	3249	1398243
29	17	13	Hs~Ref:NM_001646.1~uORF:IOH14363~RFU:15172.92	HA20421~B29R13C17	5560	46690	120	9016	8984	1992	22	660	660	1930	2676	138	100	93	0	4499	4224	883	20	594	594	1160	1289	111	95	89	0	2.14	2.293	2.159	2.381	1.702	2.462	0.754	115	566	87	12261	11954	1.097	8356	3905	8324	3630	1033121
30	3	4	Hs~Ref:NM_014061.3~uORF:IOH10824~RFU:11638.71	HA20421~B30R04C03	7240	44910	140	9013	8735	2877	32	39	39	89	231	259	100	100	0	3303	2926	882	30	227	227	281	155	55	100	99	0	2.917	3.222	3.139	3.352	1.651	3.36	0.871	153	465	94	12050	11395	1.545	8974	3076	8696	2699	1336476
19	4	1	ERa~N/A	HA20421~B19R01C04	11900	30800	120	9011	7988	2791	34	40	40	47	24	51	100	100	0	227	234	38	16	178	178	178	11	6	95	89	0	183.082	141.929	145.793	158.472	1.735	147.826	0.592	117	606	94	9020	8004	7.516	8971	49	7948	56	934609
1	19	22	ERa~N/A	HA20421~B01R22C19	5870	17020	120	9004	8512	3009	35	48	48	75	83	110	100	100	0	215	215	24	11	159	159	160	9	5	93	90	0	159.929	151.143	141.867	165.902	1.923	171.531	0.696	133	583	92	9012	8520	7.321	8956	56	8464	56	1132046
25	21	22	AlexaAntiMouseAb~N/A	HA20421~B25R22C21	6310	44000	110	8993	7536	3075	40	40	40	46	29	63	100	100	0	3081	2549	1019	39	221	221	221	13	5	100	100	0	3.13	3.22	3.216	3.459	1.934	3.337	0.89	103	509	92	11813	9824	1.646	8953	2860	7496	2328	776215
10	1	22	ERa~N/A	HA20421~B10R22C01	6810	25980	120	8992	8479	2612	30	46	46	56	43	76	100	100	0	212	209	14	6	173	173	173	10	5	94	84	0	229.385	234.25	222.733	247.862	1.935	261.8	0.628	129	634	89	8985	8469	7.842	8946	39	8433	36	1093751
44	7	13	Hs~Ref:NM_182597.1~uORF:IOH44503~RFU:9782.45	HA20421~B44R13C07	17100	60190	200	8984	9410	3864	41	46	46	60	53	88	100	100	0	1289	2046	1472	71	210	210	211	15	7	98	96	0	8.284	5.1	6.13	8.076	3.65	5.893	0.465	289	899	68	10017	11200	3.05	8938	1079	9364	1836	2719582
5	18	5	Hs~Ref:NM_004088.1~uORF:IOH11297~RFU:12400.75	HA20421~B05R05C18	5710	18120	140	8976	8767	2532	28	67	67	164	300	182	100	100	0	2852	2562	683	26	216	216	408	374	91	97	93	0	3.38	3.708	3.897	3.839	1.632	4.195	0.798	145	543	95	11545	11046	1.757	8909	2636	8700	2346	1271256
36	20	2	Hs~MGC:BC001370.2~uORF:IOH3980~RFU:8087.77	HA20421~B36R02C20	19670	49010	150	8975	8549	3218	37	60	60	243	434	178	100	100	0	7413	6074	2463	40	221	221	339	342	100	100	98	0	1.24	1.45	1.394	1.595	1.729	1.457	0.866	167	649	90	16107	14342	0.31	8915	7192	8489	5853	1427626
47	9	16	Hs~Ref:NM_173822.1~uORF:IOH27491~RFU:27034.23	HA20421~B47R16C09	13020	65290	120	8974	9368	3685	39	80	80	220	343	155	100	100	0	5945	5440	1290	23	328	328	479	283	59	98	98	0	1.583	1.817	1.582	1.8	1.934	2.081	0.774	122	464	93	14511	14400	0.663	8894	5617	9288	5112	1142842
26	14	17	Hs~MGC:BC021187.1~uORF:IOH10893~RFU:23170.89	HA20421~B26R17C14	9430	43030	140	8972	8334	2773	33	41	41	139	384	276	100	100	0	1638	1414	527	37	217	217	218	13	5	99	97	0	6.285	6.928	6.453	8.525	2.238	6.876	0.907	142	449	92	10352	9490	2.652	8931	1421	8293	1197	1183399
45	4	1	ERa~N/A	HA20421~B45R01C04	2960	62310	120	8971	8532	2612	30	46	46	55	28	50	100	100	0	261	259	24	9	210	210	214	18	8	84	64	0	175	173.184	162.452	195.045	2.121	195.038	0.495	113	615	90	8976	8535	7.451	8925	51	8486	49	964138
25	2	22	ERa~N/A	HA20421~B25R22C02	2520	43990	130	8968	8354	2999	35	45	45	58	56	96	100	100	0	248	248	23	9	203	203	204	14	6	85	72	0	198.289	184.644	183.442	204.467	1.981	203.552	0.576	134	633	95	8968	8354	7.631	8923	45	8309	45	1119481
26	16	15	Hs~Ref:NM_005030.2~CAT:PV3501~RFU:1625.23	HA20421~B26R15C16	9820	42620	130	8963	8766	4309	49	41	41	44	18	40	100	100	0	234	233	16	6	204	204	204	14	6	82	52	0	297.4	300.862	290.177	286.743	1.958	334.41	0.494	141	490	88	8952	8754	8.216	8922	30	8725	29	1236065
48	6	12	Hs~Ref:NM_001014.2~uORF:IOH4063~RFU:23004.31	HA20421~B48R12C06	16910	64460	120	8959	8614	1984	23	134	134	225	302	134	100	100	0	2681	2530	648	25	456	456	563	393	69	94	90	0	3.966	4.089	4.092	4.398	1.843	4.569	0.674	128	473	89	11050	10554	1.988	8825	2225	8480	2074	1102625
19	3	1	ERa~N/A	HA20421~B19R01C03	11710	30800	120	8954	8657	2363	27	40	40	45	22	48	100	100	0	217	216	17	7	179	179	180	12	6	89	73	0	234.579	232.892	238.364	256.956	1.652	245.013	0.658	119	613	96	8952	8654	7.874	8914	38	8617	37	1030227
18	15	13	Hs~Ref:NM_183382.1~uORF:IOH40957~RFU:14221.37	HA20421~B18R13C15	9590	33220	130	8953	9316	4383	47	36	36	40	11	27	100	100	0	1972	1875	717	38	180	180	183	15	8	100	100	0	4.976	5.475	5.483	5.596	1.601	5.819	0.92	124	486	96	10709	10975	2.315	8917	1792	9280	1695	1155192
2	9	3	Hs~Ref:NM_015607.2~uORF:IOH41553~RFU:5907.51	HA20421~B02R03C09	8400	13210	130	8949	8587	3861	44	51	51	78	83	106	100	100	0	1282	1138	572	50	164	164	165	11	6	100	99	0	7.959	8.764	8.729	11.383	2.507	9.095	0.794	140	537	89	10016	9510	2.993	8898	1118	8536	974	1202127
44	16	5	Hs~Ref:NM_016167.3~uORF:IOH40609~RFU:18206.53	HA20421~B44R05C16	18910	58600	120	8948	8255	4298	52	50	50	78	87	111	100	100	0	1915	1624	743	45	222	222	318	241	75	88	82	0	5.256	5.852	5.663	6.756	2.524	6.424	0.829	126	476	92	10591	9607	2.394	8898	1693	8205	1402	1040084
6	8	17	Hs~MGC:BC032508.1~uORF:IOH62199~RFU:24978.87	HA20421~B06R17C08	8150	20480	130	8946	8285	3087	37	43	43	50	36	72	100	100	0	3520	3058	1053	34	172	172	172	10	5	100	100	0	2.659	2.856	2.908	3.106	2.431	3.073	0.834	133	506	93	12251	11128	1.411	8903	3348	8242	2886	1101876
38	1	22	ERa~N/A	HA20421~B38R22C01	6850	57520	130	8945	8011	4226	52	44	44	63	51	80	100	100	0	245	429	438	102	204	204	202	12	5	81	67	0	217.098	35.409	198.161	111.298	5.913	57.685	0.081	149	659	90	8942	8192	7.762	8901	41	7967	225	1193592
1	18	20	Hs~Ref:NM_133430.1~uORF:IOH50108~RFU:27052.46	HA20421~B01R20C18	5670	16630	170	8943	7588	3843	50	48	48	100	182	182	100	99	0	6213	4789	2519	52	170	170	211	139	65	98	97	0	1.472	1.632	1.661	1.825	2.062	1.656	0.889	218	630	89	14938	12159	0.558	8895	6043	7540	4619	1654238
33	1	12	Hs~Ref:NM_002136.1~uORF:IOH3526~RFU:10432.43	HA20421~B33R12C01	2300	51000	140	8942	8305	4036	48	47	47	72	73	101	100	100	0	1753	1459	654	44	215	215	214	14	6	99	96	0	5.783	6.638	6.737	8.326	2.45	7.012	0.847	157	731	89	10433	9502	2.532	8895	1538	8258	1244	1303814
26	16	17	Hs~Ref:NM_001412.2~uORF:IOH3055~RFU:8781.42	HA20421~B26R17C16	9830	43010	110	8942	9040	1193	13	199	199	758	1095	144	100	100	0	655	673	80	11	272	272	586	598	102	3	0	0	22.828	22.047	22.489	22.237	1.272	-46.942	0.021	98	367	60	9126	9242	4.513	8743	383	8841	401	885890
8	13	18	Hs~Ref:NM_175923.2~uORF:IOH22051~RFU:6130.45	HA20421~B08R18C13	18190	20670	120	8940	7894	3055	38	45	45	50	25	50	100	100	0	896	791	286	36	159	159	159	12	7	100	95	0	12.069	12.419	12.192	14.372	1.973	12.671	0.899	122	491	95	9632	8481	3.593	8895	737	7849	632	963048
21	9	3	Hs~Ref:NM_018990.1~uORF:IOH27033~RFU:27062.41	HA20421~B21R03C09	3910	35710	140	8937	8480	3021	35	77	77	116	105	90	100	100	0	3953	3581	980	27	206	206	220	43	19	100	100	0	2.365	2.49	2.583	2.508	1.682	2.691	0.875	168	600	92	12607	11778	1.242	8860	3747	8403	3375	1424583
41	5	7	Hs~Ref:NM_004765.2~uORF:IOH14041~RFU:10930.78	HA20421~B41R07C05	3160	59020	130	8937	9460	2345	24	91	91	254	334	131	100	100	0	3039	2890	477	16	307	307	480	447	93	100	97	0	3.238	3.627	3.583	3.608	1.388	4.03	0.858	149	511	91	11578	11952	1.695	8846	2732	9369	2583	1409582
37	9	20	Hs~MGC:BC014298.1~uORF:IOH13449~RFU:16814.09	HA20421~B37R20C09	3950	57100	170	8932	9580	5412	56	43	43	54	37	68	100	100	0	5854	5515	1619	29	226	226	303	201	66	99	99	0	1.579	1.803	1.729	1.575	1.729	2.209	0.835	239	540	69	14517	14826	0.659	8889	5628	9537	5289	2289528
4	5	5	Hs~Ref:NM_007278.1~uORF:IOH41289~RFU:13625.89	HA20421~B04R05C05	16600	13610	130	8932	9104	3481	38	46	46	55	34	61	100	100	0	1724	1655	476	28	163	163	200	73	36	98	94	0	5.693	6.071	5.872	6.252	2.139	7.411	0.691	138	449	95	10447	10550	2.509	8886	1561	9058	1492	1256380
18	11	3	Hs~Ref:NM_080390.3~uORF:IOH41393~RFU:27044.59	HA20421~B18R03C11	8810	31200	140	8932	8467	2938	34	60	60	118	129	109	100	100	0	5816	5110	1723	33	217	217	1175	1749	148	90	80	0	1.585	1.718	1.717	1.827	1.982	1.898	0.596	156	601	93	14471	13300	0.664	8872	5599	8407	4893	1320833
45	17	12	Hs~Ref:NM_002714.2~uORF:IOH39632~RFU:9637.83	HA20421~B45R12C17	5570	64530	130	8926	8590	4251	49	46	46	61	63	103	100	100	0	1556	1308	537	41	179	179	181	12	6	98	96	0	6.449	7.568	7.801	9.261	2.887	8.37	0.828	142	435	94	10257	9673	2.689	8880	1377	8544	1129	1219850
27	6	15	Hs~Ref:NM_003384.1~uORF:IOH41408~RFU:26368.72	HA20421~B27R15C06	12300	42590	130	8925	7811	3603	46	45	45	51	20	39	100	100	0	2408	2044	807	39	207	207	214	28	13	100	100	0	4.035	4.228	4.349	4.436	1.892	4.656	0.842	132	550	94	11081	9603	2.012	8880	2201	7766	1837	1031046
18	1	22	ERa~N/A	HA20421~B18R22C01	6780	35010	130	8918	8023	3310	41	44	44	72	85	118	100	100	0	220	217	22	10	182	182	190	31	16	54	4	0	233.526	227.971	207.125	242.813	2.013	277.342	0.221	143	671	92	8912	8014	7.867	8874	38	7979	35	1147233
8	21	6	Hs~MGC:BC014924.1~uORF:IOH25747~RFU:27060.75	HA20421~B08R06C21	19780	18290	170	8916	8071	4692	58	45	45	67	91	135	100	100	0	3128	2261	1394	61	153	153	156	23	14	100	100	0	2.982	3.807	3.837	4.62	1.811	3.808	0.902	194	504	57	11846	10134	1.576	8871	2975	8026	2108	1565786
28	1	22	ERa~N/A	HA20421~B28R22C01	15830	44010	110	8913	8719	1778	20	46	46	95	140	147	100	100	0	224	228	27	11	193	193	195	13	6	76	57	0	286.032	247.8	257.419	330.9	2.758	241.051	0.399	80	451	100	8898	8708	8.16	8867	31	8673	35	697500
18	16	13	Hs~Ref:NM_183382.1~uORF:IOH40957~RFU:14399.97	HA20421~B18R13C16	9790	33220	130	8899	8458	3365	39	36	36	41	17	41	100	100	0	1870	1769	800	45	178	178	178	10	5	100	100	0	5.238	5.294	5.2	6.248	2.169	5.435	0.847	128	548	87	10555	10013	2.389	8863	1692	8422	1591	1082669
12	20	5	Hs~MGC:BC064984.1~uORF:IOH40665~RFU:19587.25	HA20421~B12R05C20	19610	22600	140	8896	7177	4307	60	43	43	50	24	48	100	100	0	3442	2858	1537	53	159	159	178	80	44	100	100	0	2.697	2.643	2.681	2.52	1.694	2.914	0.853	173	595	86	12136	9833	1.431	8853	3283	7134	2699	1241557
26	15	3	Hs~Ref:NM_018664.1~uORF:IOH44746~RFU:27048.73	HA20421~B26R03C15	9640	40220	150	8886	8070	3844	47	41	41	55	49	89	100	100	0	6108	5158	2021	39	201	201	215	44	20	100	100	0	1.497	1.62	1.645	1.621	2.232	1.743	0.86	187	498	92	14752	12986	0.582	8845	5907	8029	4957	1509121
21	13	5	Hs~Ref:NM_012472.1~uORF:IOH26570~RFU:23006.35	HA20421~B21R05C13	4700	36110	110	8884	8840	1457	16	308	308	1947	2580	132	100	100	0	3775	3810	368	9	237	237	842	1060	125	100	100	0	2.424	2.388	2.476	2.365	1.195	2.933	0.666	80	355	100	12114	12105	1.277	8576	3538	8532	3573	707171
4	22	22	AlexaAntiMouseAb~N/A	HA20421~B04R22C22	20000	17000	110	8875	7805	3004	38	43	43	52	30	57	100	100	0	2647	2360	756	32	150	150	151	11	7	100	100	0	3.537	3.512	3.695	3.569	2.11	3.785	0.875	99	547	94	11329	9972	1.823	8832	2497	7762	2210	772689
4	11	17	Hs~Ref:NM_024068.1~uORF:IOH6654~RFU:10373.36	HA20421~B04R17C11	17800	16000	140	8871	8588	3241	37	44	44	52	26	50	100	100	0	1501	1347	366	27	159	159	164	49	29	96	95	0	6.577	7.192	6.961	7.631	2.073	7.886	0.873	162	508	89	10169	9732	2.718	8827	1342	8544	1188	1391207
38	4	1	ERa~N/A	HA20421~B38R01C04	7470	53300	130	8869	8714	2400	27	41	41	47	17	36	100	100	0	271	290	124	42	218	218	218	14	6	91	84	0	166.566	120.458	161.929	171.261	2.037	119.978	0.217	128	674	87	8881	8745	7.38	8828	53	8673	72	1115386
42	18	3	Hs~Ref:XM_086879.4~uORF:IOH43381~RFU:27054.95	HA20421~B42R03C18	10300	58220	130	8869	8446	3503	41	42	42	47	21	44	100	100	0	4542	3942	1332	33	208	208	213	71	33	99	97	0	2.037	2.251	2.235	2.391	2.213	2.413	0.88	135	535	94	13161	12138	1.026	8827	4334	8404	3734	1140237
37	17	9	Hs~Ref:NM_080588.1~uORF:IOH46132~RFU:9571.01	HA20421~B37R09C17	5530	54950	170	8859	8651	2374	27	52	52	87	142	163	100	100	0	3772	3937	1126	28	234	234	306	126	41	99	99	0	2.489	2.322	2.323	2.397	1.783	2.548	0.785	258	588	82	12345	12302	1.316	8807	3538	8599	3703	2232050
29	11	5	Hs~MGC:BC050645.1~uORF:IOH27032~RFU:27089.76	HA20421~B29R05C11	4360	45090	130	8855	8852	4140	46	39	39	45	19	42	100	100	0	5954	5200	1721	33	226	226	226	14	6	100	100	0	1.539	1.772	1.74	1.72	1.747	1.944	0.875	137	570	88	14544	13787	0.622	8816	5728	8813	4974	1212667
40	17	5	Hs~Ref:NM_001001330.1~uORF:IOH40137~RFU:16938.55	HA20421~B40R05C17	19060	54100	120	8855	8739	3428	39	53	53	105	143	136	100	100	0	1631	1466	425	28	238	238	291	105	36	98	92	0	6.319	7.073	7.017	7.473	1.874	8.143	0.781	116	487	94	10195	9914	2.66	8802	1393	8686	1228	1013692
31	5	20	Hs~Ref:NM_033414.1~uORF:IOH10240~RFU:17217.99	HA20421~B31R20C05	12140	48140	120	8850	9356	4467	47	38	38	40	10	25	100	100	0	1518	1384	483	34	219	219	218	15	6	99	99	0	6.784	7.998	7.979	8.232	1.83	8.697	0.896	120	510	89	10111	10483	2.762	8812	1299	9318	1165	1122698
11	4	1	ERa~N/A	HA20421~B11R01C04	11910	21780	120	8848	7995	2652	33	41	41	46	20	43	100	100	0	201	202	18	8	169	169	169	9	5	90	86	0	275.219	241.03	244.707	250.728	1.781	269.333	0.563	127	626	95	8839	7987	8.104	8807	32	7954	33	1015306
43	1	22	ERa~N/A	HA20421~B43R22C01	11430	62020	140	8844	7550	3887	51	45	45	61	54	88	100	100	0	229	232	26	11	193	193	198	24	12	68	33	0	244.417	192.436	188.6	194.706	2.027	217.024	0.5	150	838	83	8835	7544	7.933	8799	36	7505	39	1132434
34	2	4	Hs~Ref:NM_145273.1~uORF:IOH10923~RFU:15672.14	HA20421~B34R04C02	7030	49410	120	8840	8850	5710	64	36	36	39	10	25	100	100	0	3520	3164	1250	39	235	235	234	13	5	100	100	0	2.68	3.009	2.834	2.59	1.829	3.563	0.882	113	523	90	12089	11743	1.422	8804	3285	8814	2929	1000096
32	7	3	Hs~Ref:NM_022170.1~uORF:IOH44460~RFU:21142.88	HA20421~B32R03C07	17070	44710	120	8839	7782	3006	38	40	40	43	13	30	100	100	0	2080	1798	647	35	196	196	197	14	7	100	100	0	4.67	4.833	4.888	5.513	2.423	5.143	0.861	116	508	90	10683	9344	2.224	8799	1884	7742	1602	902750
18	3	16	Hs~Ref:NM_021803.1~CAT_PHC0215~RFU:1037.54	HA20421~B18R16C03	7180	33810	130	8838	8350	2634	31	46	46	67	67	100	100	100	0	217	212	17	8	176	176	185	88	47	0	0	0	214.439	230.667	209.412	246.444	1.825	266.313	0.095	127	504	90	8833	8340	7.744	8792	41	8304	36	1060414
3	22	22	AlexaAntiMouseAb~N/A	HA20421~B03R22C22	15500	17010	110	8829	8052	2308	28	44	44	50	23	46	100	100	0	2628	2144	878	40	158	158	159	10	6	100	100	0	3.557	4.032	3.841	4.91	2.312	4.033	0.849	100	549	87	11255	9994	1.831	8785	2470	8008	1986	805220
48	9	6	Hs~Ref:NM_032117.1~uORF:IOH23109~RFU:26968.76	HA20421~B48R06C09	17510	63260	100	8828	9319	2818	30	78	78	152	190	125	100	100	0	5636	5563	569	10	227	227	842	1139	135	100	100	0	1.618	1.732	1.679	1.666	1.346	2.026	0.712	94	359	87	14159	14577	0.694	8750	5409	9241	5336	875943
10	4	1	ERa~N/A	HA20421~B10R01C04	7430	21760	130	8827	8445	2439	28	42	42	47	19	40	100	100	0	193	191	19	9	166	166	167	11	6	73	54	0	325.37	336.12	313.037	386.12	2.488	321.262	0.459	134	644	78	8812	8428	8.346	8785	27	8403	25	1131625
38	6	17	Hs~Ref:NM_024333.1~uORF:IOH4546~RFU:27066.55	HA20421~B38R17C06	7850	56530	160	8825	7706	4420	57	47	47	113	223	197	100	100	0	3940	3297	2330	70	217	217	266	116	43	98	98	0	2.358	2.487	2.715	2.835	2.098	2.569	0.674	191	606	88	12501	10739	1.237	8778	3723	7659	3080	1471924
45	18	12	Hs~Ref:NM_002714.2~uORF:IOH39632~RFU:10870.21	HA20421~B45R12C18	5760	64530	130	8823	8414	3388	40	51	51	75	68	90	100	100	0	1611	1518	778	51	184	184	373	535	143	86	73	0	6.147	6.269	6.347	7.549	2.67	7.013	0.645	129	515	88	10199	9697	2.62	8772	1427	8363	1334	1085408
14	9	15	Hs~Ref:NM_006212.1~uORF:IOH34755~RFU:27086.03	HA20421~B14R15C09	8390	29080	130	8822	7921	3504	44	44	44	61	52	85	100	100	0	3338	2596	1250	48	183	183	206	59	28	98	96	0	2.782	3.264	3.295	3.999	2.413	3.395	0.85	155	497	93	11933	10290	1.476	8778	3155	7877	2413	1227710
4	12	17	Hs~Ref:NM_024068.1~uORF:IOH6654~RFU:10523.93	HA20421~B04R17C12	18000	16000	150	8821	9163	3949	43	49	49	56	28	50	100	100	0	1482	1390	416	29	162	162	227	172	75	94	93	0	6.645	7.422	7.082	7.787	2.155	9.135	0.724	164	526	91	10092	10342	2.732	8772	1320	9114	1228	1502704
43	13	4	Hs~Ref:NM_000398.3~uORF:IOH3023~RFU:13215.23	HA20421~B43R04C13	13830	58380	160	8819	9892	5520	55	50	50	185	537	290	100	100	0	2827	3204	1863	58	221	221	231	56	24	100	100	0	3.365	3.299	3.475	3.601	1.471	3.325	0.885	250	492	76	11375	12825	1.751	8769	2606	9842	2983	2473028
31	7	7	Hs~MGC:BC024291.1~uORF:IOH14775~RFU:11163.48	HA20421~B31R07C07	12540	45540	120	8817	10255	7227	70	37	37	39	7	17	100	100	0	1654	1594	721	45	209	209	210	13	6	100	100	0	6.076	7.378	7.698	6.788	2.045	8.79	0.859	108	479	93	10225	11603	2.603	8780	1445	10218	1385	1107498
1	19	9	Hs~MGC:BC055314.1~uORF:IOH29446~RFU:27041.27	HA20421~B01R09C19	5870	14430	140	8817	8908	4496	50	48	48	55	28	50	100	100	0	5224	4542	1487	32	163	163	165	16	9	100	100	0	1.733	2.023	1.948	1.977	2.019	2.347	0.811	143	553	94	13830	13239	0.793	8769	5061	8860	4379	1273862
34	17	20	Hs~Ref:NM_207286.1~uORF:IOH50103~RFU:8053.33	HA20421~B34R20C17	10040	52610	130	8815	7930	2991	37	47	47	72	71	98	100	100	0	2075	1851	856	46	238	238	343	241	70	90	85	0	4.773	4.887	4.557	6.127	2.296	4.83	0.863	139	517	85	10605	9496	2.255	8768	1837	7883	1613	1102338
37	18	9	Hs~Ref:NM_080588.1~uORF:IOH46132~RFU:10195.8	HA20421~B37R09C18	5740	54940	170	8809	8830	3160	35	48	48	73	128	175	100	100	0	4104	3994	1043	26	231	231	278	93	33	100	100	0	2.262	2.334	2.319	2.297	1.478	2.628	0.837	258	437	89	12634	12545	1.178	8761	3873	8782	3763	2278029
32	1	16	Hs~Ref:NM_000758.2~CAT_PHC2015~RFU:291.31	HA20421~B32R16C01	15870	47300	100	8807	8513	5430	63	46	46	86	123	143	100	100	0	219	218	12	5	203	203	202	15	7	50	11	0	547.563	564.467	549.88	490.946	2.576	592.606	0.297	92	399	88	8777	8482	9.097	8761	16	8467	15	783216
36	19	2	Hs~MGC:BC001370.2~uORF:IOH3980~RFU:9428.35	HA20421~B36R02C19	19470	49010	130	8807	9429	3445	36	67	67	268	458	170	100	100	0	7454	6896	1691	24	277	277	390	277	71	100	100	0	1.218	1.414	1.283	1.42	1.63	1.535	0.799	144	488	88	15917	15981	0.284	8740	7177	9362	6619	1357791
7	16	12	Hs~Ref:NM_022650.1~uORF:IOH41794~RFU:12864.66	HA20421~B07R12C16	14290	19510	120	8804	8158	3666	44	40	40	45	20	44	100	100	0	3858	3372	1016	30	169	169	175	23	13	100	100	0	2.376	2.534	2.56	2.339	1.575	2.803	0.913	126	505	95	12453	11321	1.248	8764	3689	8118	3203	1027893
2	22	15	Hs~Ref:NM_014840.2~CAT:PV4127~RFU:995.36	HA20421~B02R15C22	11000	15620	130	8804	8455	3941	46	45	45	55	37	67	100	100	0	212	216	31	14	166	166	166	10	6	94	86	0	190.413	168.2	193.246	176.621	1.757	198.298	0.617	131	596	84	8805	8460	7.573	8759	46	8410	50	1107586
21	10	12	Hs~MGC:BC013171.1~uORF:IOH22121~RFU:24088.76	HA20421~B21R12C10	4110	37520	130	8803	8379	3032	36	42	42	52	29	55	100	100	0	4222	3741	1094	29	203	203	205	17	8	100	100	0	2.18	2.356	2.248	2.406	1.836	2.52	0.868	145	517	94	12780	11875	1.124	8761	4019	8337	3538	1214946
11	21	22	AlexaAntiMouseAb~N/A	HA20421~B11R22C21	15310	26020	110	8798	7425	3038	40	42	42	45	12	26	100	100	0	2843	2390	877	36	170	170	171	11	6	100	100	0	3.276	3.326	3.369	3.303	1.887	3.481	0.908	94	531	79	11429	9603	1.712	8756	2673	7383	2220	697930
30	19	3	Hs~Ref:NM_201613.1~uORF:IOH45918~RFU:27072.77	HA20421~B30R03C19	10440	44720	170	8794	8358	5187	62	40	40	67	138	205	100	100	0	6246	6671	7397	110	222	222	263	124	47	100	98	0	1.453	1.29	2.112	1.662	2.802	0.884	0.196	203	637	81	14778	14767	0.539	8754	6024	8318	6449	1696729
47	13	8	Hs~MGC:BC035568.1~uORF:IOH27552~RFU:14574.21	HA20421~B47R08C13	13810	63690	130	8794	8130	4677	57	56	56	76	57	75	100	99	0	2809	2731	698	25	205	205	227	57	25	100	99	0	3.356	3.196	3.382	2.415	3.328	5.321	0.339	139	351	78	11342	10600	1.747	8738	2604	8074	2526	1130060
29	9	14	Hs~Ref:NM_005870.3~uORF:IOH53845~RFU:17778.88	HA20421~B29R14C09	3960	46890	120	8791	8706	2702	31	67	67	139	242	174	100	100	0	2124	1950	550	28	230	230	681	847	124	88	74	0	4.606	5.023	4.843	5.291	1.737	6.333	0.544	134	351	90	10618	10359	2.204	8724	1894	8639	1720	1166602
47	6	18	Hs~Ref:NM_007284.1~uORF:IOH5114~RFU:12568.01	HA20421~B47R18C06	12420	65690	150	8791	8352	3462	41	80	80	254	432	170	100	100	0	3307	2902	1066	36	203	203	429	358	83	94	90	0	2.806	3.065	2.929	3.4	2.734	3.82	0.709	166	567	95	11815	10971	1.489	8711	3104	8272	2699	1386405
21	20	22	ERa~N/A	HA20421~B21R22C20	6110	39520	120	8787	8422	2441	28	37	37	45	22	48	100	100	0	235	248	38	15	204	204	204	12	5	87	70	0	282.258	190.568	242.625	236	2.188	205.087	0.429	133	601	94	8781	8429	8.141	8750	31	8385	44	1120078
33	1	8	Hs~Ref:NM_005435.2~uORF:IOH14526~RFU:11329.27	HA20421~B33R08C01	2310	50190	110	8787	8739	1976	22	271	271	744	1295	174	100	100	0	4507	4621	400	8	955	955	1256	1071	85	100	100	0	2.398	2.31	2.337	2.25	1.299	2.614	0.722	80	559	100	12068	12134	1.262	8516	3552	8468	3666	699144
21	7	18	Hs~MGC:BC041366.2~uORF:IOH27747~RFU:25932.37	HA20421~B21R18C07	3500	38720	140	8784	8862	3831	43	42	42	54	37	68	100	100	0	4641	3895	1491	38	203	203	247	94	38	100	100	0	1.97	2.389	2.367	2.52	1.98	2.652	0.826	154	556	85	13180	12512	0.978	8742	4438	8820	3692	1364747
5	22	3	Hs~MGC:BC029796.1~uORF:IOH22647~RFU:27035.89	HA20421~B05R03C22	6500	17730	180	8784	8551	4214	49	50	50	98	178	181	100	100	0	5186	4264	1950	45	178	178	285	238	83	100	100	0	1.744	2.081	2.096	2.059	1.385	2.238	0.88	263	767	86	13742	12587	0.802	8734	5008	8501	4086	2248831
21	2	5	Hs~MGC:BC010907.1~uORF:IOH12088~RFU:12083.13	HA20421~B21R05C02	2500	36110	130	8783	7705	3260	42	44	44	121	294	242	100	100	0	2028	1741	781	44	189	189	259	274	105	86	83	0	4.752	4.936	4.995	5.955	2.484	5.18	0.829	135	517	93	10578	9213	2.249	8739	1839	7661	1552	1040220
22	19	22	ERa~N/A	HA20421~B22R22C19	10400	39490	130	8782	7386	2802	37	39	39	46	25	54	100	100	0	251	340	255	75	190	190	190	11	5	97	86	0	143.328	48.98	134.593	97.327	3.105	61.601	0.154	132	706	89	8804	7497	7.163	8743	61	7347	150	974892
27	2	8	Hs~Ref:NM_016093.2~uORF:IOH14674~RFU:21829.52	HA20421~B27R08C02	11500	41190	140	8778	7262	3903	53	43	43	56	43	76	100	100	0	1670	1354	685	50	198	198	214	59	27	90	87	0	5.934	6.245	6.37	7.352	2.195	6.427	0.902	147	524	91	10207	8375	2.569	8735	1472	7219	1156	1067556
13	22	5	Hs~Ref:NM_018956.2~uORF:IOH11209~RFU:26102.23	HA20421~B13R05C22	6510	27150	180	8777	8705	2721	31	40	40	59	180	305	100	100	0	2881	3184	1131	35	176	176	184	64	34	99	99	0	3.23	2.881	2.809	3.059	1.718	2.965	0.866	276	960	90	11442	11673	1.692	8737	2705	8665	3008	2402546
47	8	8	Hs~MGC:BC010876.1~uORF:IOH9862~RFU:6704.38	HA20421~B47R08C08	12810	63680	120	8774	8015	3032	37	65	65	124	140	112	100	100	0	1469	1434	557	38	198	198	243	90	37	94	93	0	6.852	6.432	6.561	7.379	2.362	6.982	0.814	118	532	86	9980	9186	2.777	8709	1271	7950	1236	945752
13	7	14	Hs~Ref:NM_003636.1~uORF:IOH29625~RFU:27078.15	HA20421~B13R14C07	3520	28940	130	8771	7825	3289	42	38	38	44	20	45	100	100	0	5050	4116	1900	46	178	178	178	12	6	100	100	0	1.792	1.977	1.949	2.521	3.015	2.035	0.816	127	548	91	13605	11725	0.842	8733	4872	7787	3938	993783
11	13	19	Hs~Ref:NM_001545.1~uORF:IOH11951~RFU:15544.35	HA20421~B11R19C13	13710	25420	140	8770	8105	3363	41	37	37	44	18	40	100	100	0	3243	2657	1055	39	171	171	170	9	5	100	99	0	2.843	3.245	3.128	3.651	2.519	3.454	0.847	145	562	91	11805	10554	1.507	8733	3072	8068	2486	1175197
44	5	10	Hs~MGC:BC053866.1~uORF:IOH28947~RFU:27065.72	HA20421~B44R10C05	16700	59590	130	8769	7722	4464	57	41	41	53	33	62	100	100	0	6635	5491	2460	44	217	217	243	65	26	99	98	0	1.36	1.456	1.5	1.401	2.916	1.619	0.831	151	485	91	15146	12955	0.444	8728	6418	7681	5274	1166016
11	1	6	Hs~Ref:NM_006924.3~uORF:IOH11039~RFU:2556.21	HA20421~B11R06C01	11300	22800	130	8768	8208	3476	42	50	50	70	90	128	100	100	0	1300	1131	398	35	169	169	169	10	5	100	100	0	7.708	8.48	8.28	9.378	2.155	9.427	0.805	153	587	92	9849	9120	2.946	8718	1131	8158	962	1255800
41	22	14	Hs~Ref:NM_153710.2~uORF:IOH45542~RFU:3884.49	HA20421~B41R14C22	6570	60420	120	8765	8945	5049	56	43	43	79	195	246	100	100	0	1360	1249	597	47	193	193	200	57	28	91	90	0	7.474	8.43	8.847	9.654	2.388	9.107	0.855	122	535	92	9889	9958	2.902	8722	1167	8902	1056	1091308
21	19	22	ERa~N/A	HA20421~B21R22C19	5910	39520	130	8758	7618	2727	35	39	39	46	22	47	100	100	0	239	386	560	145	204	204	203	12	5	87	67	0	249.114	41.643	202.691	185.588	4.423	50.943	0.056	132	649	94	8754	7761	7.961	8719	35	7579	182	1005640
5	5	15	Hs~MGC:BC093661.1~uORF:IOH61968~RFU:27073.6	HA20421~B05R15C05	3110	20120	140	8758	8669	5048	58	45	45	57	47	82	100	100	0	5794	4964	1909	38	163	163	163	11	6	100	100	0	1.547	1.796	1.814	1.716	2.735	2.14	0.772	154	544	93	14344	13425	0.63	8713	5631	8624	4801	1335014
32	17	19	Hs~MGC:BC070154.1~uORF:IOH63011~RFU:11285.97	HA20421~B32R19C17	19070	47910	130	8758	8187	3138	38	58	58	67	33	49	100	100	0	1392	1269	352	27	194	194	197	36	18	98	98	0	7.262	7.562	7.793	7.918	1.952	8.367	0.841	116	350	83	9898	9204	2.86	8700	1198	8129	1075	949639
8	12	20	Hs~Ref:NM_001039724.1~uORF:IOH63165~RFU:6455.33	HA20421~B08R20C12	17990	21070	120	8757	9089	3501	38	42	42	48	29	60	100	100	0	3375	3002	933	31	160	160	163	16	9	100	100	0	2.711	3.183	3.233	3.296	2.003	3.516	0.838	126	559	90	11930	11889	1.439	8715	3215	9047	2842	1145182
48	22	1	AlexaAntiMouseAb~N/A	HA20421~B48R01C22	20130	62260	160	8753	8921	7158	80	44	44	57	59	103	97	95	0	1991	2434	1862	76	198	198	203	38	18	100	98	0	4.857	3.97	3.77	3.197	3.484	4.167	0.877	147	983	65	10502	11113	2.28	8709	1793	8877	2236	1311361
31	7	14	Hs~Ref:NM_003935.3~uORF:IOH54164~RFU:13045.75	HA20421~B31R14C07	12540	46940	110	8749	8535	3004	35	39	39	43	16	37	100	100	0	2068	1871	644	34	211	211	211	14	6	100	100	0	4.69	5.118	4.919	5.327	1.513	5.285	0.906	112	448	83	10567	10156	2.23	8710	1857	8496	1660	955924
29	2	22	ERa~N/A	HA20421~B29R22C02	2560	48490	130	8749	8029	3409	42	42	42	57	52	91	100	100	0	258	256	21	8	212	212	212	13	6	89	80	0	189.283	181.523	179.246	177.491	1.748	210.253	0.614	138	659	87	8753	8031	7.564	8707	46	7987	44	1108064
40	16	3	Hs~Ref:NM_006591.1~uORF:IOH41599~RFU:19040.69	HA20421~B40R03C16	18860	53690	120	8744	8266	3263	39	60	60	840	1958	233	97	87	0	2171	2010	779	38	221	221	550	788	143	86	67	0	4.453	4.587	4.587	5.133	2.341	4.911	0.795	121	529	89	10634	9995	2.155	8684	1950	8206	1789	1000192
24	10	15	Hs~Ref:NM_006298.2~uORF:IOH34757~RFU:21853.14	HA20421~B24R15C10	17640	38100	140	8744	7544	3136	41	92	92	384	760	197	97	97	0	4058	3426	1226	35	193	193	276	192	69	100	100	0	2.239	2.305	2.332	2.257	2.024	2.579	0.804	148	558	85	12517	10685	1.163	8652	3865	7452	3233	1116469
17	19	22	ERa~N/A	HA20421~B17R22C19	5870	35010	130	8740	8162	2615	32	38	38	45	23	51	100	100	0	229	244	56	22	187	187	187	13	6	93	75	0	207.19	142.526	171.542	175.042	2.051	179.968	0.184	142	637	86	8744	8181	7.695	8702	42	8124	57	1159000
40	1	5	Hs~MGC:BC010501.1~uORF:IOH10253~RFU:21652.48	HA20421~B40R05C01	15830	54090	150	8739	8051	2793	34	49	49	214	526	245	100	100	0	2352	2169	511	23	258	258	338	199	58	100	99	0	4.15	4.187	4.097	4.077	1.387	4.754	0.84	235	430	59	10784	9913	2.053	8690	2094	8002	1911	1892057
35	16	6	Hs~Ref:NM_030636.1~uORF:IOH39935~RFU:27061.16	HA20421~B35R06C16	14370	49840	170	8732	9066	3805	41	41	41	51	68	133	100	100	0	2280	2267	600	26	234	234	236	21	8	100	100	0	4.248	4.439	4.167	4.33	1.773	5.332	0.778	263	449	83	10737	11058	2.087	8691	2046	9025	2033	2384412
29	15	17	Hs~Ref:NM_002013.2~uORF:IOH14109~RFU:24702.61	HA20421~B29R17C15	5160	47500	130	8731	8399	2340	27	45	45	72	63	87	100	100	0	1961	1815	531	29	228	228	242	63	26	100	96	0	5.012	5.264	5.151	5.689	1.931	5.607	0.83	136	464	93	10419	9941	2.325	8686	1733	8354	1587	1142298
34	1	22	ERa~N/A	HA20421~B34R22C01	6830	53030	120	8728	8309	3773	45	42	42	53	39	73	100	100	0	264	374	565	151	224	224	223	13	5	71	58	0	217.15	55.113	230.941	187.127	4.362	139.807	0.009	130	630	92	8726	8417	7.763	8686	40	8267	150	1080211
20	3	1	ERa~N/A	HA20421~B20R01C03	16260	30780	130	8726	8437	2907	34	45	45	53	29	54	100	100	0	230	233	43	18	174	174	176	17	9	88	69	0	155.018	142.237	163.208	165.388	1.907	150.139	0.548	133	672	93	8737	8451	7.276	8681	56	8392	59	1122139
13	17	4	Hs~MGC:BC014959.1~uORF:IOH13467~RFU:27071.11	HA20421~B13R04C17	5520	26930	120	8725	8535	4176	48	41	41	45	19	42	100	100	0	4285	3942	1050	26	176	176	178	14	7	100	100	0	2.113	2.255	2.432	1.962	2.039	2.698	0.805	133	458	91	12793	12260	1.08	8684	4109	8494	3766	1135198
35	19	22	ERa~N/A	HA20421~B35R22C19	14960	53010	130	8719	7890	3423	43	38	38	49	36	73	100	100	0	278	274	28	10	234	234	235	13	5	76	65	0	197.295	196.3	192.214	218.055	2.009	197.27	0.61	138	630	91	8725	7892	7.624	8681	44	7852	40	1088824
31	16	18	Hs~Ref:XM_498434.1~uORF:IOH57016~RFU:27057.85	HA20421~B31R18C16	14350	47740	130	8719	8474	2594	30	49	49	110	173	157	100	100	0	8191	7682	1628	21	220	220	232	38	16	100	100	0	1.088	1.129	1.116	1.103	1.412	1.163	0.907	145	480	87	16641	15887	0.121	8670	7971	8425	7462	1228696
22	15	4	Hs~MGC:BC036123.1~uORF:IOH27289~RFU:21774.49	HA20421~B22R04C15	9600	35870	110	8719	8559	2707	31	50	50	266	797	299	100	98	0	3130	3236	440	13	187	187	220	169	76	100	100	0	2.946	2.791	2.897	2.626	1.552	3.361	0.569	80	345	100	11612	11558	1.559	8669	2943	8509	3049	684682
31	11	20	Hs~MGC:BC001780.1~uORF:IOH4955~RFU:14271.51	HA20421~B31R20C11	13340	48130	110	8711	8402	3442	40	40	40	48	27	56	100	100	0	1927	1710	756	44	230	230	230	11	4	100	100	0	5.11	5.65	5.741	6.596	1.767	5.577	0.917	112	379	96	10368	9842	2.353	8671	1697	8362	1480	941047
22	8	21	Hs~Ref:NM_015609.1~uORF:IOH23006~RFU:8426.16	HA20421~B22R21C08	8190	39310	170	8708	7987	4491	56	41	41	88	183	207	100	100	0	642	897	909	101	206	206	220	50	22	62	60	0	19.878	11.499	14.27	30.53	4.799	10.066	0.515	256	692	78	9103	8637	4.313	8667	436	7946	691	2044755
21	9	6	Hs~MGC:BC064940.1~uORF:IOH39946~RFU:17962.04	HA20421~B21R06C09	3900	36310	130	8706	8356	3516	42	38	38	42	13	30	100	100	0	2562	2355	865	36	195	195	195	12	6	100	100	0	3.662	3.851	3.756	3.977	1.723	4.069	0.898	138	472	91	11035	10478	1.873	8668	2367	8318	2160	1153107
[truncated: 21,787 more rows]
[truncated: 7 more columns]
